# Supplementary material for: Combinatorial microRNA activity is essential for the transition of pluripotent cells from proliferation into dormancy
Source: HighWire-hosted journal article supplement (doi:10.1101/gr.278662.123), 2024-05-06
Supplement: Supplemental_Table_S1.xlsx [file Supplemental_Table_S1.xlsx]

## Sheet: tableS1
	Raw counts: Kallisto																Differential gene expression results: DESeq2
	Wild type, normal				Wild type, mTORi				DGCR8 KO, normal				DGCR8 KO, mTORi				WT mTORi vs WT normal						DGCR8 KO mTORi vs DGCR8 KO normal
ensembl_gene_id	WTNrep1	WTNrep2	WTNrep3	WTNrep4	WTPrep1	WTPrep2	WTPrep3	WTPrep4	DGCR8KONrep1	DGCR8KONrep2	DGCR8KONrep3	DGCR8KONrep4	DGCR8KOPrep1	DGCR8KOPrep2	DGCR8KOPrep3	DGCR8KOPrep4	baseMean_wt	log2FoldChange_wt	lfcSE_wt	stat_wt	pvalue_wt	padj_wt	baseMean_ko	log2FoldChange_ko	lfcSE_ko	stat_ko	pvalue_ko	padj_ko
ENSMUSG00000000001.4	14265	15418	13957	12454	11212	11817	11669	10747	13720	15963	15406	13679	10329	13430	11189	10395	12884.4	-0.397496	0.027827	0	1	1	12884.4	-0.501608	0.0278047	0	1	1
ENSMUSG00000000028.15	4592.11	4796.1	5531.84	5119.67	6240.43	6104.55	6071.6	5734.09	6140.02	6752.3	6453.33	5768.36	5654.87	7430.72	6953.85	6128.57	5951.88	0.170563	0.076482	0	1	1	5951.88	-0.0902593	0.076309	0	1	1
ENSMUSG00000000037.16	442	383	402	320	482	451	424	469	169	181	144	146	243	255	191	148	305.699	0.138979	0.166078	0	1	1	305.699	0.124728	0.175633	0	1	1
ENSMUSG00000000056.7	1824	2067	1649	1573	2783.49	2890.99	2770	2603	2060	2283	2156.99	1883	2395	2912	2555	2156	2297.51	0.686997	0.0942595	0	1	1	2297.51	0.432396	0.0941241	0	1	1
ENSMUSG00000000058.6	14	3	13	7	1	2	1	1	2	3	2	1	0	0	0	0	2.93644	-2.65569	1.0028	-1.65107	0.0987243	1	2.93644	-4.06022	1.35803	-2.25343	0.0242322	0.446909
ENSMUSG00000000078.7	3035	3171	3730	3402	3819	4203	4320	4157	2430	2690	2930	2742	3306	4906	3969	3751	3518.77	0.125963	0.0824401	0	1	1	3518.77	0.435239	0.0826997	0	1	1
ENSMUSG00000000085.16	1656.81	1655.38	1705.33	1572.32	1824.57	1837.87	1864.78	1711.93	1071.67	1165.43	1155	1138.55	1517.46	1943.49	1626.85	1636.92	1569.93	-0.103649	0.0683514	0	1	1	1569.93	0.49416	0.0695752	0	1	1
ENSMUSG00000000088.7	18956	19772	18909	16913	15170	14929	14559	13453	18850	21057	20342	19170	15499	20613	18160	16550	17739.1	-0.502587	0.0274058	0	1	1	17739.1	-0.348914	0.027261	0	1	1
ENSMUSG00000000093.6	19	18	26	18	62	74	49	44	30	23	25	29	74	91	113.037	92	48.0411	1.39996	0.257925	1.55068	0.120979	1	48.0411	1.6618	0.238231	2.77797	0.00546995	0.134783
ENSMUSG00000000094.12	194	203	98	133	54	72	75	80	34	29	25	27	37	46.0083	34	36	74.6292	-1.23271	0.222737	-1.04477	0.29613	1	74.6292	0.278562	0.26578	0	1	1
ENSMUSG00000000103.12	6.66765	4.55487	6.47377	6.31063	1.31181	2.2941	4.94212	0	0	0	0	0	0	0	0	0	2.06353	-1.69934	1.1442	-0.611201	0.541067	NA	2.06353	0	1.74378	0	1	NA
ENSMUSG00000000120.6	2840.65	3331.63	3870.91	3603.82	2081.51	2130.2	2501.84	2217.67	1715.13	2274.36	2382.15	2169.64	2584.21	3614.44	3372.87	2928.84	2727.62	-0.715031	0.109488	0	1	1	2727.62	0.421842	0.109617	0	1	1
ENSMUSG00000000125.5	86	90	76	56	16	19	25	19	4	8	10	6	8	10	4	7	28.348	-2.04958	0.270945	-3.87378	0.000107161	0.00737109	28.348	-0.0756516	0.432149	0	1	1
ENSMUSG00000000126.11	92	96	56	60	80	65	62	46	83	89	70	76	64	81	59	61	71.2222	-0.355186	0.198919	0	1	1	71.2222	-0.392951	0.197182	0	1	1
ENSMUSG00000000127.15	2051	2294	2176	1910	1730	1787	1716	1731	1661	1826	1929	1796	1269	1649	1380	1286	1766.95	-0.312824	0.0454625	0	1	1	1766.95	-0.467379	0.0467421	0	1	1
ENSMUSG00000000131.15	19139.4	19640.8	17691.5	16124.2	17396.7	18175.5	18023	16782.9	15825.4	18557.2	17120.4	16064.2	13357.6	17519.4	15296.7	14263.9	16961.7	-0.163161	0.0268383	0	1	1	16961.7	-0.310529	0.0269735	0	1	1
ENSMUSG00000000134.17	14350	15324	13226.6	11622	14652	14409	16699	15667.9	9767.01	10829	11514.9	10525.8	12873	17459.9	15333	14798	13672.3	0.0401157	0.0648772	0	1	1	13672.3	0.410428	0.0649653	0	1	1
ENSMUSG00000000142.15	1300	1618	1843	1605	4497	4745	4384	4192	835	991	949	854	1070	1232	1281	968	2004.95	1.40278	0.113701	3.54247	0.0003964	0.0232522	2004.95	0.255791	0.116278	0	1	1
ENSMUSG00000000148.17	2750	2889	2960	2656	3978	4120	4109	3875	1843	2185	1992	1853	2951	3691	3516	3175	3014.13	0.418764	0.0456518	0	1	1	3014.13	0.643585	0.0468155	0	1	1
ENSMUSG00000000149.10	5922.56	6388.43	6215.59	5813.57	7172.5	7334.1	7760.69	7082.72	5273.52	6069.94	5969.32	5491.05	5096.38	7559.83	6112.19	5765.88	6294.45	0.172426	0.0451664	0	1	1	6294.45	-0.0270768	0.0453973	0	1	1
ENSMUSG00000000154.16	113	116	164	171	341	309	284	273	169	180	164	158	221	359	309	266	222.279	1.03152	0.147457	0.213728	0.83076	1	222.279	0.65272	0.145889	0	1	1
ENSMUSG00000000159.16	5	10	0	10	25	23.9999	15	8	27	24	23	16.9918	18	16	24.3822	17	18.3425	2.32449	0.631754	2.09653	0.0360354	1	18.3425	-0.0125855	0.578134	0	1	1
ENSMUSG00000000167.14	165.134	183.133	195.35	130.065	189.071	190.059	189	182.056	112.051	130.289	160.478	127	150	182.09	151.005	182.007	164.321	0.188166	0.123336	0	1	1	164.321	0.269906	0.128079	0	1	1
ENSMUSG00000000168.9	11297	12397	11208	9830	8776	8658	8764	8400	12497	13666	13370	12240	8511.01	10988	9597	8747	10555	-0.380192	0.0464763	0	1	1	10555	-0.52228	0.0463566	0	1	1
ENSMUSG00000000171.5	11389	12119	11212	10684	8006	7370	7382	6662	9962	11186	11123	9970	5530	7656	6385	5880	8986.16	-0.728772	0.0429014	0	1	1	8986.16	-0.86819	0.0430802	0	1	1
ENSMUSG00000000182.9	15	11	27	18	22	12	19	13	17	7	14	18	15	20	22	28	17.4339	-0.213712	0.405494	0	1	1	17.4339	0.465023	0.406268	0	1	1
ENSMUSG00000000183.6	7.06398	6.04221	6.02413	3.05176	7.02165	19.0982	6.03644	10.0569	9.11105	7.03238	7.06956	5.02632	3.02747	11.1772	8.14937	9.10732	7.56941	0.843493	0.544956	0	1	1	7.56941	-0.00130927	0.542774	0	1	1
ENSMUSG00000000184.12	1901	2016	2191	1891	1621	1692	1455	1355	1653	1634	2291	2377	676	654	720	568	1626.43	-0.689566	0.177437	0	1	1	1626.43	-1.8446	0.178714	-4.72596	2.29029e-06	0.00012694
ENSMUSG00000000194.13	5106.69	5465.43	5293.62	4808.21	7812.26	7694.74	7557.48	6881.04	4514.65	5359.05	5394.37	4735.59	8148.9	11267.3	8965.99	9020.33	6586.1	-0.123836	0.0565045	0	1	1	6586.1	0.605512	0.0564169	0	1	1
ENSMUSG00000000197.8	48.669	24.1026	20.0844	20.4897	70.1603	99.1919	78.4409	91.1369	24.1101	30.0241	32.0134	28.0557	162.104	281.009	184.076	165.01	70.6939	0.682133	0.262589	0	1	1	70.6939	2.14678	0.255971	4.48011	7.46036e-06	0.00037113
ENSMUSG00000000202.9	41	68.9999	84.9999	81	72	102	66	70.0001	85.0001	95	56.9999	99.0001	178	246	154	178	102.329	0.0985816	0.228828	0	1	1	102.329	0.911773	0.216911	0	1	1
ENSMUSG00000000204.16	41.1264	56.1962	28.3542	24	32.1905	33.2806	28.3092	26.0115	3.08385	4.02422	4	4.08925	6.09317	6.07923	2.06094	6.0162	15.3173	-0.46312	0.346593	0	1	1	15.3173	0.40395	0.575798	0	1	1
ENSMUSG00000000214.11	48	65	66	50	81	82	58	69.0001	10	9	11	15	34	35	33	11	42.4583	0.0665046	0.27013	0	1	1	42.4583	1.02215	0.348273	0.063607	0.949283	1
ENSMUSG00000000215.11	2	6	7	4	1	5	2	8	0	1	0	2	1	1	4	13	3.59218	-0.332729	0.9638	0	1	1	3.59218	2.5757	1.22044	1.29109	0.196671	1
ENSMUSG00000000216.8	0	1	3	0	0	1	1	1	0	2	2	1	0	0	0	2	0.876324	-0.484839	1.69887	0	1	NA	0.876324	-1.37676	1.75232	-0.215009	0.82976	NA
ENSMUSG00000000223.13	200.782	220.575	151	119.028	192	239.109	203.81	206.036	198.033	253.942	230.011	184.761	330	459.494	385.118	427.852	247.977	0.145078	0.130469	0	1	1	247.977	0.865353	0.123317	0	1	1
ENSMUSG00000000244.17	294.016	285.987	324.391	267.535	545.762	540.608	485.713	513.934	160.401	162.314	242.207	165.835	419.456	591.649	510.317	446.845	367.302	0.737953	0.0958236	0	1	1	367.302	1.31854	0.101717	3.13169	0.00173804	0.0497993
ENSMUSG00000000247.11	33	30	48	40	41	36	45	36	13	26	39.9999	25	21	33	12	20	31.7113	-0.0236659	0.349159	0	1	1	31.7113	-0.0975967	0.374825	0	1	1
ENSMUSG00000000248.16	3.0331	2.5683	1.1009	1.22595	0	2.0277	3.06502	1.01756	0	0	1.99201	0	1.00739	0	0	1	1.15383	-0.477893	1.36471	0	1	NA	1.15383	0.43747	1.74043	0	1	NA
ENSMUSG00000000253.13	642.57	655	714	715.579	592.181	613.524	670.703	609.976	1687	1791	1853.39	1692.59	838	1079.33	987	899	1002.54	-0.244397	0.076505	0	1	1	1002.54	-1.01028	0.0714295	-0.143851	0.885618	1
ENSMUSG00000000263.15	1	5	0	0	1	2	0	0	0	0	0	0	2	2	1	0	0.843325	-1.27632	1.96348	-0.14073	0.888083	NA	0.843325	2.68733	2.0487	0.82361	0.410161	NA
ENSMUSG00000000266.11	11.1265	17.9386	10.0561	12.7491	12.2551	9.11644	13.2732	15.0215	7.038	13	8.09817	8.06049	28.0346	50.3527	21.1651	39.1387	17.3432	-0.511717	0.463108	0	1	1	17.3432	2.04069	0.456556	2.27943	0.0226415	0.423794
ENSMUSG00000000275.16	18015.9	18805.7	20624.8	19092.8	29174.3	31386.9	27956.2	26986.1	24349	27444.8	27768.7	25481.4	28337.4	38304	30746.2	29341.6	26463.9	0.558144	0.0734126	0	1	1	26463.9	0.291166	0.0733532	0	1	1
ENSMUSG00000000276.11	4641.25	4627.45	5024.81	4286.49	9276.06	10060	8847.67	8243.95	5024.75	6115.81	5683	5365.29	7890.79	10819.3	8326.84	7760.43	6932.11	0.923963	0.0598621	0	1	1	6932.11	0.531448	0.0597388	0	1	1
ENSMUSG00000000278.10	15003	15676	16654	14560	19116	19463	18430	17941	19176	22210	20923	18788	20563	29438	23334	23049	19498.5	0.176436	0.0469028	0	1	1	19498.5	0.11599	0.046755	0	1	1
ENSMUSG00000000282.12	6034	6505	5817	5266	10347	10151	11096	10210	5494	6563	6204	5772	9288	12075	11031	10115	8163.44	0.773403	0.0491861	0	1	1	8163.44	0.685638	0.0491627	0	1	1
ENSMUSG00000000290.13	116	89	44	33	11	15	11	9	14	13	13	21	1	10	1	5	25.2472	-2.63351	0.427366	-3.82227	0.000132227	0.00889246	25.2472	-1.95761	0.541091	-1.76977	0.076765	1
ENSMUSG00000000295.13	1515	1571	1485	1312	1259	1244	1210	1020	1594	1760	1550	1553	926	1245	1007	897	1331.23	-0.431318	0.061979	0	1	1	1331.23	-0.82584	0.0623264	0	1	1
ENSMUSG00000000296.8	1408	1532.01	1601	1368	1289	1306	1304	1189	1354	1434	1423	1263	1129	1341	1075	1050	1321.35	-0.329392	0.0621512	0	1	1	1321.35	-0.381539	0.0627451	0	1	1
ENSMUSG00000000301.16	264.238	287.099	305.296	278	280.74	252.385	291.409	229.098	334	378	367.001	354.002	292.003	395	363.002	367	314.039	-0.283472	0.109022	0	1	1	314.039	-0.171002	0.104886	0	1	1
ENSMUSG00000000303.12	28638.8	31118.1	31518.7	29214	35368.5	37992.5	38778.4	35114.7	38521	44253.1	42511.8	40424	45501.2	65722.8	50932.7	49175.5	39980.6	0.194436	0.0487304	0	1	1	39980.6	0.241037	0.0486394	0	1	1
ENSMUSG00000000305.12	236	274	345.002	356	836	939	824	899	385	478	555.608	480	631.01	987	818	761	596.375	1.04447	0.163975	0.271217	0.786224	1	596.375	0.871109	0.162337	0	1	1
ENSMUSG00000000308.14	684	722	1062	937	888	972.999	954.001	880	1348	1582	1805	1494	1494	2602	2148	2268	1345.92	0.0421886	0.138257	0	1	1	1345.92	0.34591	0.136109	0	1	1
ENSMUSG00000000317.11	930	1006	741	689	399	396	530	435	1360	1473	1335	1249	453	497	521	419	794.976	-1.14137	0.12092	-1.16915	0.242344	1	794.976	-1.62559	0.11962	-5.2298	1.69693e-07	1.14928e-05
ENSMUSG00000000318.16	29.9816	47.8989	32.4269	50.0795	73.9035	51.4048	29.6056	39.292	0	1	1	0	2	0	0	0	25.5237	0.184551	0.43053	0	1	1	25.5237	0.526271	1.40303	0	1	1
ENSMUSG00000000320.10	146.414	149.134	139.731	132.823	197.586	210.745	141.971	175.879	513.533	633.77	511.147	481.702	679.96	964.958	760.132	719.546	404.487	0.245849	0.118424	0	1	1	404.487	0.387401	0.0956145	0	1	1
ENSMUSG00000000325.16	2881.66	3178.16	3753	3343.95	4968.31	5417.03	5240.44	4846.52	5945.24	6011.03	5814.89	5760.72	6835.33	8157.24	8227.25	6341.47	5359.63	0.551721	0.0889105	0	1	1	5359.63	0.142595	0.0883432	0	1	1
ENSMUSG00000000326.13	906.518	895.628	907.146	896.143	822.904	806.308	786.714	747.264	1274.85	1346	1299.31	1172.03	1285.64	1760.98	1365.76	1397.05	1103.91	-0.180447	0.0645386	0	1	1	1103.91	0.103014	0.060837	0	1	1
ENSMUSG00000000339.14	3895	4283	4799	4267	3559	3627	3760	3398	4556	4997	5048	4594	2868	3719	3105	3099	3988.01	-0.346716	0.0659485	0	1	1	3988.01	-0.666893	0.066001	0	1	1
ENSMUSG00000000340.10	4584.23	4859.87	4362.57	3917.31	4214.43	4404.93	4032.2	3810.13	4038.65	4725.65	4444.53	3967.07	4182.29	5989.83	4887.61	4881.1	4448.21	-0.353713	0.0451907	0	1	1	4448.21	0.091	0.0450019	0	1	1
ENSMUSG00000000346.9	3887	4260.02	4010	3680.08	4236	4272	4447.07	4254.09	4256	4707.54	4383.24	4403.09	3423.57	4825.69	4030.03	3861	4176.6	0.0437685	0.0394686	0	1	1	4176.6	-0.220849	0.0394056	0	1	1
ENSMUSG00000000355.13	2256.01	2373	2124	1880	1759	1777.01	1655	1661	1578	1671	1737	1617	1267	1725	1477	1451	1753.44	-0.376278	0.0486513	0	1	1	1753.44	-0.218121	0.0499092	0	1	1
ENSMUSG00000000359.3	31	29	32	30	42	35	25	39	37	27	19	29	33	30	40	17	31.4917	0.255794	0.334451	0	1	1	31.4917	0.196241	0.340657	0	1	1
ENSMUSG00000000365.9	3700	4019	4139	3563	5077	5327.99	5581	5519.99	7825	9450	8920	7677.01	9469	13520	10285	10585	7073.12	0.207778	0.0709147	0	1	1	7073.12	0.222549	0.0700467	0	1	1
ENSMUSG00000000374.8	4252	4244	3572	3135	4281	4530	4334	4032	3376	3988	3891	3514	3966	5217	4444	3938	4028.56	0.0830527	0.0727781	0	1	1	4028.56	0.156927	0.0727943	0	1	1
ENSMUSG00000000378.15	1954	2188	2554	2255	2435	2330	2412	2175	3337	3344	3454	3250	2524	3478	2963	2620	2704.92	-0.054247	0.0842804	0	1	1	2704.92	-0.353608	0.0835799	0	1	1
ENSMUSG00000000384.15	19712.9	21099.9	21530.3	19738.2	17795.2	17603.2	18510.4	17233.1	16037.8	17962	19061.6	17838.4	11201.6	14020.6	13620.6	11897.5	17192.1	-0.269231	0.0502126	0	1	1	17192.1	-0.455123	0.0503731	0	1	1
ENSMUSG00000000385.8	10	16	21	17	28	30	21	42	0	4	1	3	9	21	14	10	17.7862	0.745282	0.517297	0	1	1	17.7862	2.7586	0.725854	2.4228	0.0154016	0.311827
ENSMUSG00000000386.15	370.051	344.097	277.017	230.05	216.625	197.026	167.864	185.308	167.743	174	159.015	149	123.809	143.985	128.041	129.755	198.951	-0.756099	0.127182	0	1	1	198.951	-0.430307	0.137535	0	1	1
ENSMUSG00000000392.17	27.0903	17.0876	19.0944	17.5656	28.335	23.2973	20.1455	27.248	11.0389	15.0079	19.1779	17	14.0296	28	14.1067	14.054	19.3398	0.179568	0.314414	0	1	1	19.3398	0.0319765	0.340247	0	1	1
ENSMUSG00000000399.10	11957.6	12595	10174.3	9507.29	8537.48	8377.92	7910.72	7753.06	8917.26	9792.17	9599.14	8678.79	7475.11	9966.45	8639.2	7922.66	9258.14	-0.536652	0.048515	0	1	1	9258.14	-0.25784	0.0485871	0	1	1
ENSMUSG00000000402.2	285.567	304.302	309.78	240.917	371.382	300.02	338.044	335.071	217.06	221.905	224.334	192.775	451.455	567.386	445.874	386.7	320.645	0.144157	0.0990847	0	1	1	320.645	0.981643	0.100035	0	1	1
ENSMUSG00000000409.14	2395	2493	2238	1949	1059	981.999	1055	1030	1884	2156	2212	2036	790.001	930	898.999	750.999	1556.25	-1.23579	0.0791371	-2.97946	0.00288759	0.130015	1556.25	-1.195	0.0800024	-2.43746	0.0147907	0.302651
ENSMUSG00000000411.7	0	2	5	4	11	6	6	5	4	5	6	5	4	7	8	5	5.12813	1.23603	0.668623	0.353007	0.724083	1	5.12813	0.122814	0.61377	0	1	1
ENSMUSG00000000416.16	72.9999	78	133	113	307	295	257	284	97	132	126	114	236	307	244	229	189.713	1.31469	0.251172	1.2529	0.21024	1	189.713	1.09746	0.250358	0.38927	0.697077	1
ENSMUSG00000000420.15	4665.99	4800	4552.07	4016.02	5304	5640.06	4745.07	4557.03	6199	7773.05	7252	6568	6111.02	8709.04	6606.01	6645.1	5839.44	0.0330412	0.0525942	0	1	1	5839.44	-0.12114	0.0519385	0	1	1
ENSMUSG00000000439.9	5446.78	5732.46	5345.13	4759.99	5572.99	5466.91	5471.63	5071.19	4504.74	5172.13	5304.64	4829.4	4940.12	6463.37	5511.11	5132.78	5306.9	-0.0978149	0.0741872	0	1	1	5306.9	0.0317029	0.0742228	0	1	1
ENSMUSG00000000440.12	3	5	12	7	6	11	4	8.00001	1	1	0	3	4	1	0	1	4.30664	0.11886	0.796577	0	1	1	4.30664	0.0727885	1.09789	0	1	1
ENSMUSG00000000441.17	14631.1	15226.9	15461.9	14113	14900.3	14792.9	14368.9	13937.4	12501.7	13928.7	14396.1	13415.6	11873	15654.9	14347.9	12857.4	14146.9	-0.13859	0.0358262	0	1	1	14146.9	-0.0558997	0.0359083	0	1	1
ENSMUSG00000000486.13	19421	20712	20726	18071	36614	34659	33613	30736.3	25557	29677	30392	26796	21757	29469	27919.1	26248	26927.4	0.747464	0.0579959	0	1	1	26927.4	-0.082618	0.0579673	0	1	1
ENSMUSG00000000489.7	387	377	289.001	312	464	392	527	524	791	844	815	769	789	1032	877	859	622.331	0.400171	0.123812	0	1	1	622.331	0.209068	0.118132	0	1	1
ENSMUSG00000000530.16	88	83.9999	64	73	167	160	138	145	375	393	338.999	270	544	708	518.999	550.999	293.172	0.878355	0.194031	0	1	1	293.172	0.549458	0.173052	0	1	1
ENSMUSG00000000531.5	1630.93	1798.34	1402.87	1261.94	2533.01	2508.98	2106.9	1882.74	1958.68	2261.93	1825.84	1742.64	2535.98	3412.88	2796.89	2728.94	2122.33	0.474016	0.0867809	0	1	1	2122.33	0.428275	0.0860637	0	1	1
ENSMUSG00000000532.11	2681.18	2900.58	2508.55	2222	5399.31	5676.35	5192.64	4918.28	7403.46	8598	7216.43	6800.72	12140.1	16887.1	13958.2	13499	7206.07	0.946758	0.0505653	0	1	1	7206.07	0.783204	0.0486042	0	1	1
ENSMUSG00000000538.18	1029	1125	907	834	2067	2028	2065	1947	1294	1659.01	1511	1400	1952	2771	2212	2187	1658.2	0.910423	0.0562185	0	1	1	1658.2	0.578423	0.0543574	0	1	1
ENSMUSG00000000544.14	7698	8310	7782	6966	12806	12346	14405	13430	10926	13008	13332	12190	17214	25274	20202	19707	13248.1	0.653517	0.0561044	0	1	1	13248.1	0.610849	0.0557527	0	1	1
ENSMUSG00000000552.10	3192.99	3353	3000	2859	1443	1412	1786	1733	4705	4997	5042	4870	2455	3322	3009	2778	3144.28	-1.05749	0.0763533	-0.752913	0.451502	1	3144.28	-0.890925	0.0749898	0	1	1
ENSMUSG00000000555.8	9935.66	10918.6	10408.3	9091.1	15252.9	15919.4	15134.1	14430.3	17922.2	21582.6	19691.1	16672.6	25298.5	33305.2	25906.6	24958.9	17626.6	0.461791	0.0503901	0	1	1	17626.6	0.455097	0.0499983	0	1	1
ENSMUSG00000000560.9	30.2967	31.1759	26.1102	21.918	31.4269	31.1199	25.3151	28.1373	15.7614	20.4283	25.5805	19.868	24.5392	44.7774	30.4662	36.4538	27.6406	-0.083464	0.274853	0	1	1	27.6406	0.643962	0.281465	0	1	1
ENSMUSG00000000561.14	30308.1	31925.1	30474.6	27191.6	23192.9	23349.7	23672.2	22645	25068.3	27956.4	27949.9	26016.5	19209.1	24002.7	21311.8	19705.7	25314.9	-0.467825	0.0288139	0	1	1	25314.9	-0.433267	0.028893	0	1	1
ENSMUSG00000000562.5	58.1555	60.9879	51.2261	26.4339	59.6763	73.0893	55.1375	63.0757	51.8975	50.0569	42.7568	44.5444	40.1047	68.2896	61.4513	76.391	54.6457	0.270343	0.229708	0	1	1	54.6457	0.236288	0.230731	0	1	1
ENSMUSG00000000563.17	27636.1	29742.3	26445.7	24170.9	21206.2	21055.4	20191.2	18858.3	27147	29793.8	28927.9	26888.8	20386.9	27328	24212.7	21646.5	24775.2	-0.508174	0.0281696	0	1	1	24775.2	-0.394562	0.0280985	0	1	1
ENSMUSG00000000567.5	26	24.2873	33.0286	28.0268	22.8148	27	13	16.6179	13	8.2452	18.5212	7.00227	17.3607	29.5332	17.3544	24.9981	20.4185	-0.575591	0.338696	0	1	1	20.4185	0.785208	0.371321	0	1	1
ENSMUSG00000000568.15	52088.8	61684.6	60493.3	51290.2	42085.4	44676.2	47095.7	43936.9	60217.7	66501.9	65767.7	62192.6	44938	54978.1	50661.7	45448.3	53386.7	-0.403721	0.0482883	0	1	1	53386.7	-0.438016	0.0482666	0	1	1
ENSMUSG00000000579.14	1598.66	1648.05	1398.26	1288.39	1875.44	1706.76	1745.61	1578.14	1382.36	1716.02	1582.78	1360.8	2248.99	3306.65	2545.68	2616.9	1911.3	0.349644	0.0898298	0	1	1	1911.3	1.27109	0.0892149	3.03867	0.00237627	0.0650663
ENSMUSG00000000581.8	3045	3391	3012	2719	2117	2225	2023	1888	2394	2663	2563	2476	1771.01	2452	1960	1984	2398.88	-0.511866	0.061665	0	1	1	2398.88	-0.0475525	0.0619783	0	1	1
ENSMUSG00000000594.7	655	720	814	750	804	899	916	793	1828	2132	1603	1548	1503	2257	1504	1617	1259.92	0.113174	0.107816	0	1	1	1259.92	-0.181614	0.104437	0	1	1
ENSMUSG00000000600.15	4870.24	5109.26	4497.72	3918.02	5961.29	6337.24	5623.01	5266.33	3098.27	3701.51	3860.22	3362.2	4688.3	6627.86	5309.9	5266.94	4798.56	0.218101	0.0483955	0	1	1	4798.56	0.500173	0.0488222	0	1	1
ENSMUSG00000000605.9	310.807	307.109	246.968	272.939	296.348	351.423	350.353	315.217	544.129	590.666	528.943	556.999	459.142	600.415	473	511.724	416.564	0.00674023	0.123031	0	1	1	416.564	-0.257911	0.116979	0	1	1
ENSMUSG00000000606.18	41.3453	50.9553	43.1119	37.1549	46.9428	59.2496	31.1574	50.276	19.3226	17.3002	22.0572	21.4275	15.9986	30.4536	34.1974	43.245	35.0261	0.0262398	0.270831	0	1	1	35.0261	0.510547	0.30559	0	1	1
ENSMUSG00000000617.14	44	58	52	46	102	85.9999	134	139	4	3	7	7	4	3	5	5	48.587	1.12911	0.25907	0.498368	0.618225	1	48.587	-0.476318	0.523491	0	1	1
ENSMUSG00000000627.15	243.162	265.252	270.117	247.061	321.097	303.066	308.141	272.115	241.047	291.151	211.133	210.088	287.08	391.239	314.11	293.082	277.515	0.128288	0.112212	0	1	1	277.515	0.242074	0.112474	0	1	1
ENSMUSG00000000628.10	33080	36772	31143	26507.5	31107	33216.8	33509	30651.3	21409.2	26791	24035.2	21785	18189.2	24155	20004	19616	27032.9	-0.0785943	0.044748	0	1	1	27032.9	-0.322427	0.0449179	0	1	1
ENSMUSG00000000631.20	2912.41	3147.82	3735.59	3143.79	7218.84	7681.06	6206.97	5927.31	13928.1	16990.1	15248.1	13760.9	15868.2	22687.2	18168.3	18283.6	10645.3	0.795391	0.0922491	0	1	1	10645.3	0.289415	0.091294	0	1	1
ENSMUSG00000000632.13	81.774	85.2244	81.0101	76.7176	129.756	138.857	147.003	135.623	106.953	99.4644	132.426	120.949	263.869	403.135	424.467	393.173	165.06	-0.378387	0.18953	0	1	1	165.06	1.65359	0.177939	3.67314	0.00023959	0.00867824
ENSMUSG00000000673.9	55.0078	93.2009	78.4175	42.398	76.7565	61.5769	57.2392	48.109	37.5386	46.1815	34.8723	34.2939	35.5926	42.949	33.3975	32.6877	51.4057	0.0197395	0.294348	0	1	1	51.4057	-0.616457	0.313498	0	1	1
ENSMUSG00000000682.7	2	8	12	6	2	13	6	5	8	12	7	12	15	5	9	6	8.04274	-0.188997	0.635293	0	1	1	8.04274	-0.255624	0.599685	0	1	1
ENSMUSG00000000686.11	22.7577	25	24.1978	21	36	36.9044	26	22.237	53.305	58	56.5698	32.4483	47.6981	86	38.6108	84	40.404	0.387543	0.309674	0	1	1	40.404	0.0413209	0.273489	0	1	1
ENSMUSG00000000690.5	2.0098	7.00986	2.05822	1.00033	0	4.00173	2	5.01918	1	2.06497	4	0	0	2.00097	0	0	2.04767	-0.155968	1.17753	0	1	NA	2.04767	-2.26521	1.5156	-0.834791	0.403835	NA
ENSMUSG00000000693.10	104.535	129.357	101.278	83.408	106.646	90.4186	67.088	97.9587	48.077	59.4981	57.2117	47.1681	87.9472	127.269	102.972	111.728	88.8539	-0.0554531	0.199481	0	1	1	88.8539	1.0008	0.208999	0.00384475	0.996932	1
ENSMUSG00000000706.16	13.0406	7.02924	6.02322	8.00436	21.0662	15.0442	18.0297	12.0573	12.8896	21.0178	9.00165	18.806	27.7166	24.059	13.0124	16.8611	15.5514	1.13947	0.418532	0.333225	0.738964	1	15.5514	0.469319	0.378587	0	1	1
ENSMUSG00000000708.14	6321.81	6700.82	6745.67	5816.71	7713.53	8177.3	7506.65	7337.73	8225.97	10173	10393	9279	8573	11934	9629	9368	8280.53	0.251754	0.0498016	0	1	1	8280.53	0.00641045	0.0493844	0	1	1
ENSMUSG00000000711.3	4550.66	4832	4876	4487	6537.65	6745	6671	6268.8	7572	8912.82	8111.4	7441.99	8121	10923.8	9203	8717.8	7058.32	0.40196	0.0394268	0	1	1	7058.32	0.0952464	0.0385479	0	1	1
ENSMUSG00000000724.10	13.1587	16.1862	18.2117	9.10757	15.0444	15.1034	13.0183	14.0282	10.0863	8.06389	18.1333	15.0758	16.2325	15.0319	16.0711	4.04949	13.3554	0.139217	0.394986	0	1	1	13.3554	-0.280453	0.406983	0	1	1
ENSMUSG00000000730.13	73549	82754	68273	62465	65782	65481	74329	69722.1	14569	12681	14293	15796	25771	30077	31777	24963	45948.1	-0.149166	0.0912312	0	1	1	45948.1	0.851683	0.0914499	0	1	1
ENSMUSG00000000731.15	7051.32	7500.61	5475.12	4453.22	6937.25	6810.94	8357.75	7583.55	1636.62	1502.56	1144.67	1543.09	1753.95	2010.52	2011.73	1503.88	4029.78	-0.0990765	0.138418	0	1	1	4029.78	-0.261289	0.140172	0	1	1
ENSMUSG00000000732.9	2625.38	2761.33	2928.06	2507.49	2901.74	3004.02	3706.52	3481.66	1093.17	1151.03	1098.3	1116.62	1511.4	2123.95	1682.19	1656.73	2200.42	0.203758	0.0794378	0	1	1	2200.42	0.530936	0.082025	0	1	1
ENSMUSG00000000738.18	3959.61	4306.4	5279.92	4589.43	6802.18	6689.24	6432.34	6105.24	5995.85	6605.79	6559.07	5738.69	5867.35	7414.39	6628.27	6069.94	5917.56	0.44126	0.0707217	0	1	1	5917.56	-0.00837272	0.0705074	0	1	1
ENSMUSG00000000739.14	246.641	249.596	283.32	303.912	590.12	609.877	520.081	563.395	305.012	355.627	320.991	331.831	1011.81	1441.24	1376.65	1447.68	644.256	1.13335	0.131036	1.01763	0.308852	1	644.256	2.05343	0.12781	8.24213	1.69172e-16	3.76043e-14
ENSMUSG00000000740.12	138467	157456	141667	126629	137986	134583	153887	135903	116232	120740	123056	118356	110525	138720	132893	112889	131268	-0.108465	0.0504023	0	1	1	131268	-0.0906656	0.0504141	0	1	1
ENSMUSG00000000743.9	6512.9	6598.94	7099.94	6506.89	7764.96	7553.86	7601	7248.96	7166.97	8129.98	7993.97	7254	6134	8484.98	7071.98	6553.99	7216.68	0.0857769	0.0473169	0	1	1	7216.68	-0.202775	0.0472742	0	1	1
ENSMUSG00000000751.13	50641.9	56155.9	47662.9	43282	39409	40356	37660	35334	43489	48481	46754	43849	31919	40342	35653	31979	42252.1	-0.497744	0.0341863	0	1	1	42252.1	-0.520679	0.0342186	0	1	1
ENSMUSG00000000753.15	222	232	160	143	21	14	11	19	1279	2088	2068	1283	449	1325	590.999	1003	627.351	-3.33557	0.345614	-6.75776	1.40142e-11	3.40158e-09	627.351	-1.11265	0.290808	-0.387375	0.698479	1
ENSMUSG00000000759.14	3914.52	4172.72	3690.23	3309.9	5196.21	5252.09	5172.19	4687.67	3993.71	4737.53	4673.94	4393.79	5638	7124.73	6389.5	5798.71	4839.8	0.357705	0.0395009	0	1	1	4839.8	0.362737	0.0389966	0	1	1
ENSMUSG00000000766.18	2	0	1	1	2	3	1	2	0	0	1	1	1	1	0	0	1.51785	0.400899	1.37312	0	1	NA	1.51785	0.330062	1.75953	0	1	NA
ENSMUSG00000000776.13	4347	4973	4732	4363	5110	5090	5249	4771	4961	5343	5409	5131	5423	7046	6651	5680	5245.65	0.0808609	0.0554562	0	1	1	5245.65	0.167883	0.055172	0	1	1
ENSMUSG00000000782.15	3586	3896	3636	3367	4401	4429	5300	4917	6118	6928	6398	5998	3884	5383	4531	4138	4801.67	0.312121	0.0637059	0	1	1	4801.67	-0.625317	0.063282	0	1	1
ENSMUSG00000000787.12	76353.4	82683	85059.1	73985.9	59809	63572.1	62954.9	61536.6	96775.5	113636	111714	103562	59111.8	73901.5	65284.1	58376.1	78261.3	-0.440711	0.043393	0	1	1	78261.3	-0.820189	0.0433715	0	1	1
ENSMUSG00000000791.9	20.0992	25.7605	24.5672	18.7866	20	12	20	14	55.5	75.5	38.5	37.5	31.6405	50.0936	34.0297	41.5	32.0998	-0.394336	0.331561	0	1	1	32.0998	-0.473685	0.280437	0	1	1
ENSMUSG00000000792.2	160	178	276	199	164	155	203	213	109	96	121	107	74	105	79	79	146.451	-0.24344	0.182051	0	1	1	146.451	-0.497873	0.196986	0	1	1
ENSMUSG00000000794.9	15	15	25	18	21	39	32	19	66	57	51	55	77	100	93	81	45.5082	0.20422	0.283676	0	1	1	45.5082	0.212557	0.219325	0	1	1
ENSMUSG00000000804.14	4494	4553.01	3647	3485	4570	5196	5001	4791	4336	5234	4910	4456	6054	8423	6495	6350	5068.68	0.199439	0.0748185	0	1	1	5068.68	0.445387	0.0744917	0	1	1
ENSMUSG00000000805.18	184	220	247	209	194	215	262	250	125	87	64	119	59	49	105	47	153.605	0.0646507	0.258534	0	1	1	153.605	-0.566295	0.274619	0	1	1
ENSMUSG00000000811.13	852	825	1058	967	1477	1498	1491	1412	479	512	454	461	376	510	480	390	830.105	0.560791	0.0959656	0	1	1	830.105	-0.247077	0.102883	0	1	1
ENSMUSG00000000817.10	7	3	9	3	7	4	1	2	2	1	5	3	7	14	8	3	5.41311	-0.241532	0.815023	0	1	1	5.41311	2.00623	0.832899	1.20811	0.227005	1
ENSMUSG00000000823.16	5932.69	6571.85	6059.33	5027.43	9128.34	9460.29	8960.88	8582.46	5980.57	6947.15	6832.98	6446.69	8349.62	10843.3	10213.3	9479.9	7759.91	0.459775	0.0481186	0	1	1	7759.91	0.634591	0.0479844	0	1	1
ENSMUSG00000000826.16	9911	10493.3	9057.01	7995	10179	10525	10249.4	9304.64	8634	10411	9881.99	9174.99	8933.35	12318	10339.4	9661	9776.93	-0.0781053	0.0420705	0	1	1	9776.93	0.0170965	0.0420488	0	1	1
ENSMUSG00000000827.18	7746.01	8518	7775	7405	10549	10300	10141	9287	8828	9600.99	9383.99	8708	8148	10431	9449.99	8498.99	9006.67	0.123527	0.0373874	0	1	1	9006.67	-0.0917932	0.0373408	0	1	1
ENSMUSG00000000838.17	8196.42	9112.66	8545.84	7377.61	8733.56	9612.58	8713.52	8591.42	8003.9	9587.75	9574.8	8504.61	8487.49	11666.8	9363.7	9199.38	8919.14	0.113218	0.0395053	0	1	1	8919.14	0.0817991	0.039399	0	1	1
ENSMUSG00000000861.15	612.825	703.59	740.229	599.326	1223	1376.14	1860.04	1701.11	383	261.105	511.623	683.188	615.173	376.089	640	364	772.202	1.08612	0.326885	0.26345	0.792204	1	772.202	-0.230238	0.328441	0	1	1
ENSMUSG00000000869.12	18	34	39	32	34	42	57	44	62	66	56	55	42	53	41	39	44.5836	0.412896	0.241887	0	1	1	44.5836	-0.59341	0.224725	0	1	1
ENSMUSG00000000876.11	576.834	612.618	570.531	483.02	854.509	839.845	806.165	785.851	759.133	866.391	825.163	738.541	748.624	1005.74	914.808	853.904	755.171	0.069164	0.064869	0	1	1	755.171	-0.313967	0.0624141	0	1	1
ENSMUSG00000000881.12	1742	1777	1740	1491	1922	2073	2047	2069	2457	2765	2295.99	2180	1980	2813	2171	2104	2093.18	0.294234	0.0744077	0	1	1	2093.18	-0.0838552	0.0736108	0	1	1
ENSMUSG00000000884.17	902.917	980.703	818.596	750.46	821.358	854.447	807.698	760.056	970.98	1122.59	1175.34	962.537	988.997	1401.88	1147.81	1070.87	963.325	-0.278799	0.0742636	0	1	1	963.325	-0.104932	0.0722189	0	1	1
ENSMUSG00000000901.17	2830.37	3003.69	2794.36	2530.47	6431.35	6111.59	6752.63	5827.44	6415.76	7387.32	6718.8	6068.84	10387.8	14964.1	11595.9	12181.7	6827.64	1.04013	0.0580567	0.691207	0.489435	1	6827.64	0.744469	0.0567635	0	1	1
ENSMUSG00000000902.13	13525.9	14664.6	14169.2	12685.6	14075.4	13228.4	13599.5	12594	12893.6	14904.2	15310.3	13670.2	11218.5	14945.3	13421.4	11709.2	13542.7	-0.148931	0.0411413	0	1	1	13542.7	-0.287111	0.0411524	0	1	1
ENSMUSG00000000903.3	242	253	193	173	220	211	221	190	406	466	422	394	332	438	345	359	303.496	-0.110485	0.0972802	0	1	1	303.496	-0.311871	0.084957	0	1	1
ENSMUSG00000000915.15	1014.73	1032.02	1182.51	1009.02	1651.37	1691.09	2089.05	1922.66	3083.16	3130.5	2825.4	2762.75	3217.63	4416.01	4001.54	3871.48	2409.97	0.768998	0.0963586	0	1	1	2409.97	0.394648	0.093917	0	1	1
ENSMUSG00000000916.15	4449.29	4719.08	5000.35	4525.75	3912.73	3868.38	4114.13	3740.14	4287.25	4846.02	4925.29	4532.35	3195.69	4138.94	3899.01	3454.44	4239.37	-0.345278	0.0468393	0	1	1	4239.37	-0.455547	0.0469493	0	1	1
ENSMUSG00000000934.9	875	973	933	834	663	632	685	683	1193	1300	1197	1175	1037	1389	1255	1185	997.409	-0.499901	0.0604437	0	1	1	997.409	-0.0931767	0.0561695	0	1	1
ENSMUSG00000000938.11	56	48	51	32	76	56	46	42	7	13	12	8.00001	39	43	36	15	34.776	0.255628	0.276329	0	1	1	34.776	1.59119	0.352465	1.6773	0.0934832	1
ENSMUSG00000000942.10	16	8	6	13	11	23	12	10	2	7	9	3	4	4	5	1	8.40581	0.262083	0.523783	0	1	1	8.40581	-0.703478	0.662295	0	1	1
ENSMUSG00000000948.16	2335.37	2241.91	1959.12	1475.25	2305.9	2596.15	2468.29	2688.03	894.608	969.688	852.03	956.994	1563.72	1839.28	1743.99	1686.4	1788.01	0.207599	0.113398	0	1	1	1788.01	0.603973	0.115159	0	1	1
ENSMUSG00000000957.11	706.002	749.792	785.422	706.349	1343.69	1310.97	1221.74	1235.22	2605.44	3137.59	3165.4	2806.14	2116.34	2621.59	2370.52	2154.43	1806.45	0.718476	0.0593753	0	1	1	1806.45	-0.439228	0.0530628	0	1	1
ENSMUSG00000000958.10	5372.03	5742.87	6186.73	5479.53	7866.06	7608.33	8431.88	7370.24	11421.1	14328.8	14831.2	13394	7661.16	9800.49	8616.91	7596.23	8882.11	0.30119	0.0694859	0	1	1	8882.11	-0.836116	0.0690754	0	1	1
ENSMUSG00000000959.7	4547.97	4900.13	4507.28	4285.47	4677.95	4541.67	4663.11	4492.76	8110.87	9186.17	9155.81	8334.03	9310.84	12472.5	10990.1	10141.8	7066.84	-0.100361	0.0299812	0	1	1	7066.84	0.139733	0.0279314	0	1	1
ENSMUSG00000000976.13	3931.24	4094.29	3914.27	3642.32	3816.23	4060.72	4375.68	3925.97	3384.98	4042.53	4209.77	3690.69	3870.46	4978.62	4675.59	4229.05	4045.49	-0.0289218	0.0705201	0	1	1	4045.49	0.142263	0.0704621	0	1	1
ENSMUSG00000000982.5	17	32	22	24	43	30	18	29	0	2	0	0	0	0	0	0	13.7177	0.233988	0.412968	0	1	1	13.7177	-1.55811	1.47967	-0.377189	0.706033	1
ENSMUSG00000001014.6	34	35	71	58	25.9999	25	27	28	32	74	58	59	25	45	48	42	43.166	-1.00753	0.310028	-0.0242964	0.980616	1	43.166	-0.611381	0.29775	0	1	1
ENSMUSG00000001016.12	21905.5	23876.9	21893.7	19722.2	17583	17602.3	17070.9	16051	19598.8	21701.8	20846.2	19321.4	14406.6	18861.5	16689.7	15261.7	18940	-0.424657	0.0246075	0	1	1	18940	-0.421133	0.0246763	0	1	1
ENSMUSG00000001017.15	20572	23819	23152	20093	19182	19139	18984.9	17819	18585	21330	21189	19832	15424	19751	17727	16349	19620.9	-0.312273	0.0412014	0	1	1	19620.9	-0.328332	0.0412566	0	1	1
ENSMUSG00000001018.15	2911.18	3077.34	3464.4	2931.99	4000.92	3978.51	3975.14	3796.9	3034.09	3399.55	3249.99	3003.36	3304.42	4346.8	3844.45	3553.09	3479.67	0.270461	0.0515602	0	1	1	3479.67	0.172311	0.0515939	0	1	1
ENSMUSG00000001020.8	1	0	6	0	0	0	0	0	2	0	1	3	0	0	0	0	0.771253	-3.16583	2.49702	-0.867367	0.385741	NA	0.771253	-3.10055	2.50036	-0.840101	0.400852	NA
ENSMUSG00000001021.12	28.7557	17.4782	17.2244	16.7088	13.1494	6.39091	1.01741	9.43816	4.26321	16.2507	10.5805	3.08152	13.5301	13.5212	10.3187	12.4847	14.4392	-2.1804	0.728435	-1.62046	0.105133	1	14.4392	0.0736466	0.738994	0	1	1
ENSMUSG00000001025.8	565	670	1202	1150	112	107	187	193	278	352	415	391	149	221	182	210	412.368	-2.65014	0.332936	-4.95632	7.18392e-07	7.86026e-05	412.368	-0.967911	0.333287	0	1	1
ENSMUSG00000001027.7	20	28	20	14	30	29	22	29	32	40	41	35	41	81	44	27	32.8239	0.587658	0.334658	0	1	1	32.8239	0.228233	0.30471	0	1	1
ENSMUSG00000001029.15	24	19	21	19	36	44.9999	48	43.0001	30	28	31.9999	40	24	47.9999	31	30	32.3895	1.0604	0.268534	0.224929	0.822034	1	32.3895	-0.106646	0.258329	0	1	1
ENSMUSG00000001034.17	5634.97	5965	5377	4828	7273	7337	7015	6649	7510	8739	8487.98	7745	7187.99	9187	8357	7435.98	7138.9	0.264757	0.0294535	0	1	1	7138.9	-0.188038	0.0287654	0	1	1
ENSMUSG00000001036.17	6995	7363	6997	6272	8547	8425.99	8488	7927	5515	6147	5744	5214	6574	9109.28	7666.99	7197.99	7125.55	0.257353	0.0479817	0	1	1	7125.55	0.490374	0.048222	0	1	1
ENSMUSG00000001039.12	1445	1566	1799	1708	2229	2065	2109	1994	1777	2161	2018	1744	1633	2222	1908	1723	1876.88	0.285499	0.0856715	0	1	1	1876.88	-0.10032	0.0855918	0	1	1
ENSMUSG00000001052.15	6852	6808.98	5002	4374	5357	5642	5582	5618	6178	7322	7069	6369.99	6817	9093.99	7863	7429	6419.03	-0.189079	0.112459	0	1	1	6419.03	0.113754	0.112284	0	1	1
ENSMUSG00000001053.15	6006	6729	5888	5106	6416.01	5968	6207	5458	6160	7185	7356	6552	6828	8771	8385	7290.01	6607.68	-0.0347495	0.0470738	0	1	1	6607.68	0.0807635	0.0467416	0	1	1
ENSMUSG00000001054.9	5908	6300	5278	4969	7626	7148	6953	6570	5761	6461	6643	6226	6237	8025	7828	6710	6501.19	0.189463	0.0493176	0	1	1	6501.19	0.0855706	0.0492085	0	1	1
ENSMUSG00000001056.3	26363	29792	30954	28626	18747	17312	19781	17671	21588	22611	24490	23617	10488	12897	13033	10567	20850.3	-0.772967	0.0739145	0	1	1	20850.3	-1.11863	0.0740561	-1.60191	0.109175	1
ENSMUSG00000001062.18	974.608	1072.55	818.244	719.623	1274.92	1236.49	1323.56	1310.08	765.537	914.071	835.174	847.326	1296.95	1667.56	1553.21	1418.02	1118.61	0.335499	0.0846495	0	1	1	1118.61	0.805376	0.0845496	0	1	1
ENSMUSG00000001065.15	1052.6	1145.66	1012.98	897.354	1638.43	1655.82	1519.44	1501.44	895.943	1174.73	1181.28	1145.99	1742.96	2370.4	2081.1	1942.88	1423.04	0.546007	0.0893232	0	1	1	1423.04	0.821922	0.0887206	0	1	1
ENSMUSG00000001076.7	51	58	49	57	28	38	26	20	80	62	86	62	35	57	38	28	48.8361	-1.04728	0.243104	-0.194492	0.845791	1	48.8361	-1.02482	0.226531	-0.109572	0.912749	1
ENSMUSG00000001082.12	6599.99	7040	8019.01	6953	10860	10442	10349	9311	5874	7009	7058	6218	8367	11150	10158	9464	8361.32	0.356621	0.0540436	0	1	1	8361.32	0.523302	0.0541353	0	1	1
ENSMUSG00000001089.14	12559	12938	10438	9350.01	12688	13676	11871	11239	14879	18691	17643	15298	13864	18346	14864	13551	13796.8	0.0302293	0.0692992	0	1	1	13796.8	-0.271523	0.0691382	0	1	1
ENSMUSG00000001095.5	22	25	39	43	54	52	37	44	17	17	16	14	11	11	8	15	26.8836	0.421206	0.297393	0	1	1	26.8836	-0.628937	0.374183	0	1	1
ENSMUSG00000001098.15	5174.2	5669.28	5348	4767.22	3771.11	3815.08	3945.87	3455.84	6498.69	7410.96	7393.32	6804.31	4699.08	5923.51	5459.9	4832.76	5304.51	-0.519354	0.0387603	0	1	1	5304.51	-0.515792	0.037922	0	1	1
ENSMUSG00000001100.10	9564.84	10099.6	10722.5	9585.81	15199.2	14839.1	13965.9	12750.6	9465.66	10793.9	10767.9	9755.07	10333.9	13413.2	11997.5	10754.1	11442.6	0.360417	0.0457396	0	1	1	11442.6	0.115721	0.0458218	0	1	1
ENSMUSG00000001103.7	14	7	13	4	4	5	5	4	5	7	14	8	2	2	0	1	5.98851	-1.1465	0.601923	-0.243388	0.807704	1	5.98851	-2.86408	0.817882	-2.27916	0.0226578	0.423794
ENSMUSG00000001105.15	1917	2036	2177	2022	2039.97	1793.48	1722	1637.97	2320	2484.98	2427	2255	1432	2114	1715	1675	2004.45	-0.319802	0.0776061	0	1	1	2004.45	-0.724523	0.0774696	0	1	1
ENSMUSG00000001119.7	6	10	16	17	14	16	12	16	14	10	12	13	18	29	27	21	15.878	0.13528	0.412295	0	1	1	15.878	0.689838	0.395476	0	1	1
ENSMUSG00000001120.15	1672	1885	1335	1280	2118	1989	2049	1942	2381	2494	2486	2446	2414	2904	2833	2411	2152.65	0.305386	0.0763536	0	1	1	2152.65	0.0147943	0.0751225	0	1	1
ENSMUSG00000001123.15	858.001	905	1004	1096	580	562	848	865	359	335.999	340	492	135	117	150	109	560.552	-0.532401	0.191425	0	1	1	560.552	-1.71395	0.201991	-3.53454	0.000408486	0.0140033
ENSMUSG00000001127.12	5075.41	5565.19	5814.39	4827.09	7636.76	7727.55	7322.92	6866.14	4760.19	5482.17	5291.71	4765.15	7013.48	9687.3	8417.36	8542.52	6469.26	0.313033	0.046492	0	1	1	6469.26	0.577773	0.0464541	0	1	1
ENSMUSG00000001128.7	304	329	448	396	564	533	521	513	325	377	392	371	487	692	593	579	461.687	0.461673	0.118627	0	1	1	461.687	0.577016	0.118361	0	1	1
ENSMUSG00000001131.11	1647	1650	1731	1588	1477	1327	1267	1132	1262	1468	1498	1321	1195	1719	1428	1463	1449.94	-0.454889	0.0734432	0	1	1	1449.94	-0.0714387	0.0736016	0	1	1
ENSMUSG00000001134.9	1424.23	1462.71	1331.09	1276.02	1212.55	1110.17	1148.29	1132.63	1146.92	1299.52	1192.5	1189.12	819.572	1166.26	1063.73	950.663	1190.09	-0.384009	0.0683268	0	1	1	1190.09	-0.466152	0.0692479	0	1	1
ENSMUSG00000001138.13	2878.12	2905.67	2627.8	2282.58	4523.15	4559.12	4600.35	4134.72	5947.85	6706.09	6242.02	5624.52	6846.26	8995.75	7454.36	7109.23	5159.79	0.575209	0.0859609	0	1	1	5159.79	0.296574	0.0850407	0	1	1
ENSMUSG00000001143.13	1015.03	983.699	1031.61	1019.32	1798.18	1875.49	1888.58	1767.51	2048.25	2607.34	2315.72	1985.53	3745.51	5302.63	4434.01	4296.4	2289.71	0.663445	0.0773002	0	1	1	2289.71	0.764704	0.0743613	0	1	1
ENSMUSG00000001150.7	22656.4	22597.3	17252.3	15891.3	11967.2	12884	13086.2	12349.2	15977.7	16956.3	17265.6	16461.2	10899.2	13682.4	12751.4	11281.1	15489.5	-0.833438	0.0963452	0	1	1	15489.5	-0.564074	0.0963787	0	1	1
ENSMUSG00000001151.10	24173.9	24144.8	20010.9	17593.9	24945.9	26878.8	26340.4	23720.5	15522.9	18552.7	18658.7	16238.9	21617	29527.8	23508.8	22185	22050.7	0.254083	0.0577932	0	1	1	22050.7	0.422958	0.0578559	0	1	1
ENSMUSG00000001155.13	24.9488	16.7212	11.2528	8.46553	12.1911	12.7014	8.14194	4	6.26142	8.14572	10.3237	12.2654	1.13517	3.48765	1.34911	1.11733	8.94167	-0.721018	0.503416	0	1	1	8.94167	-2.91574	0.754663	-2.53853	0.0111319	0.242092
ENSMUSG00000001156.9	603	544	522	406	872	910.001	811	812	318	317	333	264	373	465	402	392	520.641	0.563285	0.0760864	0	1	1	520.641	0.20377	0.0844404	0	1	1
ENSMUSG00000001157.13	3306.09	3518.12	3184.8	2729.12	3719.44	4055.19	3799.68	3667.19	1974.84	2227.19	2174.98	2082.97	2121.33	2707.7	2420.05	2326.7	2878.81	0.180009	0.042589	0	1	1	2878.81	0.113207	0.04448	0	1	1
ENSMUSG00000001158.13	3328.01	3963	3502	3085	2832	2844	2711	2430	1904	1888	1863	1681	1310	1603	1471	1303	2378.05	-0.462031	0.0577328	0	1	1	2378.05	-0.508523	0.0603501	0	1	1
ENSMUSG00000001166.17	119	124	116	122	121	134	137	108	224.759	249	217	205	167	192	186	153	161.918	-0.173784	0.183679	0	1	1	161.918	-0.154306	0.174531	0	1	1
ENSMUSG00000001168.16	5	5	4	4	8	9	5	8	1	2	1	3	5	7	11	2	5.08773	0.483714	0.638448	0	1	1	5.08773	1.7501	0.777641	0.964583	0.334754	1
ENSMUSG00000001173.15	2997.09	3088.6	3397.33	3060.35	4572.97	4773.45	4584.18	4363.94	3934.82	4597.71	4162.94	3920.06	5017.1	6504.76	5261.15	4837.72	4289.82	0.512518	0.044559	0	1	1	4289.82	0.340746	0.0439134	0	1	1
ENSMUSG00000001175.14	26410	29329	28423	25504	19597	20029	19679	18304	25466	28074	27638	25507	11995	14573	13629	11684	21635	-0.470634	0.0563416	0	1	1	21635	-1.07343	0.0564669	-1.30043	0.193453	1
ENSMUSG00000001211.15	2659	2800	2651	2431	3560	3615.99	3659	3395	2380	2466	2714	2727	3972	4727	4433.01	3610	3191.48	0.138267	0.0686504	0	1	1	3191.48	0.480713	0.0685301	0	1	1
ENSMUSG00000001225.12	30.1346	32.0107	19.8442	19.6204	47.5812	48.5718	24.6492	23.9041	12.5377	20.0506	31.7302	14.2255	28.0412	38.6649	38.2113	44.6589	29.9384	0.37476	0.388208	0	1	1	29.9384	0.764704	0.395703	0	1	1
ENSMUSG00000001227.12	365	357	308	329	246	213	289	212	577	564	592	581	399	445	496	396	398.923	-0.600413	0.118823	0	1	1	398.923	-0.513343	0.111886	0	1	1
ENSMUSG00000001228.14	33845.7	37021.7	44547.5	40071.5	37499.7	37557.8	37992.6	35259.7	48433.5	55043.1	54500.5	50771.5	28643.8	33800.8	32244.7	27311.6	39833.7	-0.166752	0.0829323	0	1	1	39833.7	-0.859353	0.0829311	0	1	1
ENSMUSG00000001229.9	9329	10004	8682	7564.01	8023	8230	8496	7592	6644	7893	7741	7180	5703	7081	6455	5764	7672.19	-0.234048	0.0403793	0	1	1	7672.19	-0.38131	0.0407676	0	1	1
ENSMUSG00000001240.13	103.864	108.79	124.8	90.6992	187.136	188.038	162.994	186.799	91.5646	90.3082	111.86	103.756	80.828	112.135	81.021	80.0533	120.546	0.707693	0.13115	0	1	1	120.546	-0.363766	0.143593	0	1	1
ENSMUSG00000001247.16	2349	2690	2775	2628	3320	3348	3946.01	3692	4245.99	4807	4258	4086.99	4599	6760.01	5731.99	5555	4006.07	0.359527	0.0799613	0	1	1	4006.07	0.259615	0.0791336	0	1	1
ENSMUSG00000001248.15	2640	2725	2761	2490	4500	4518	4512	4206.99	3210.99	3759	3668	3346	4506	6129.99	5501	5413	3932.28	0.617051	0.0492404	0	1	1	3932.28	0.444895	0.0485553	0	1	1
ENSMUSG00000001249.14	265	297	342	302	469	483	666	659	286	236.999	174	220	232	283	282	224	339.373	0.782489	0.181991	0	1	1	339.373	0.0629807	0.186497	0	1	1
ENSMUSG00000001260.10	10	10	6	12	1	8	3	7	4	7	8	6	4	15	2	10	7.42296	-1.53285	0.658528	-0.809153	0.418427	1	7.42296	0.172687	0.650947	0	1	1
ENSMUSG00000001270.9	20394.9	21947.3	31392.7	28594	16533	15893.9	17140.7	16285.7	9974.62	11151.5	12085.7	11721.6	11194.8	15364.8	14901.8	13298	16907.2	-0.743661	0.128472	0	1	1	16907.2	0.155637	0.1286	0	1	1
ENSMUSG00000001280.13	19068	18722.1	14209	12222	16509	18697	17615	16948	14599	17932	17075	15292	17109	22159	17995	16825	16997	0.0732828	0.0930627	0	1	1	16997	0.133395	0.0930514	0	1	1
ENSMUSG00000001281.10	2721	3027	2930	2680	2682	2574	2660	2422	2385	2510	2485	2356	1607	1874	1832	1308	2400.39	-0.140584	0.0940514	0	1	1	2400.39	-0.552253	0.094815	0	1	1
ENSMUSG00000001285.12	5068.58	5785.78	5814.13	5070.89	5743.78	5630.18	5793.91	5143.81	5761.53	6643.13	6453.73	6044.65	5002.52	6562.14	6048.68	5361.89	5737.05	-0.0654383	0.0425277	0	1	1	5737.05	-0.198352	0.0423612	0	1	1
ENSMUSG00000001288.15	38935	43400	32799	29430	40195	39382	39427	36593	12741	14725	14592	13827	13066	14308	15331	11024	25786.7	0.0517298	0.0842811	0	1	1	25786.7	-0.18757	0.0845682	0	1	1
ENSMUSG00000001289.12	6261.28	6748.02	6363.82	5733.12	6215.22	5950.81	6119.01	5402.02	5667.42	6485.71	5995.18	5682.29	4900.49	6586.61	5767.1	5195.04	5957.95	-0.238467	0.0293929	0	1	1	5957.95	-0.323843	0.0295606	0	1	1
ENSMUSG00000001300.16	2663	3007	2389	2113	2002	2247	2208	2177	220	203	281	361	409	495	506	410	1362.66	-0.304539	0.130949	0	1	1	1362.66	0.660643	0.140729	0	1	1
ENSMUSG00000001305.5	9384.35	10571.4	9587.14	8387.16	7002.33	6692.96	7361.81	6725.78	12707.8	13709.2	13849.4	12963.9	8485.43	11001	9832.12	8744.47	9867.33	-0.579092	0.0391713	0	1	1	9867.33	-0.646842	0.0387129	0	1	1
ENSMUSG00000001313.12	1018.09	1102.68	1293.66	1166.84	753.362	653.149	751.374	612.264	1891.77	1965.01	1737.85	1652.67	593.15	690.965	629.145	563.633	1081.16	-0.820615	0.102105	0	1	1	1081.16	-1.641	0.101748	-6.29985	2.97941e-10	3.16162e-08
ENSMUSG00000001323.17	240.484	283.279	294.96	234.069	238.772	253.683	274.888	227.991	281.71	317.629	259.142	291.431	342.55	447.364	419.771	383.098	300.444	-0.343322	0.116377	0	1	1	300.444	0.567463	0.112239	0	1	1
ENSMUSG00000001333.9	77.6251	71.4681	90.7204	78.6612	64.3152	77.353	80.4323	52.3402	120.577	128.531	110.54	93.4842	101.331	128.427	102.446	101.369	92.4217	-0.311124	0.170696	0	1	1	92.4217	-0.181858	0.156263	0	1	1
ENSMUSG00000001334.9	67.2694	67.1377	57.0703	70.1584	112.447	109.206	85.242	103.303	191.318	245.558	182.19	145.275	144.134	207.324	143.211	176.321	130.371	0.549194	0.175864	0	1	1	130.371	-0.31535	0.154101	0	1	1
ENSMUSG00000001348.15	202	233	214	210	307	293	253	204	535.999	551	449	420	333	460	355	314	332.304	0.221379	0.139821	0	1	1	332.304	-0.404825	0.132905	0	1	1
ENSMUSG00000001349.5	89.0001	106	89	108	69	49	49.9999	71	102	116	113	123	20	24	33	10	75.4344	-0.612155	0.318252	0	1	1	75.4344	-2.44489	0.339043	-4.26169	2.02891e-05	0.000933432
ENSMUSG00000001366.14	1671	1806	1740	1527	1987	1916	2025.99	1881	1940	2217	2109	1993	1945	2684	2425	2082	1984.09	0.0313329	0.0624213	0	1	1	1984.09	0.0384569	0.0616727	0	1	1
ENSMUSG00000001376.17	5605.28	6009.3	7160.49	6460.23	7767.79	7932.52	7703.4	7361.86	5926.6	6949.07	7490.23	6724.02	7692.93	10270.8	8468.48	8259.09	7321.04	0.122185	0.0844277	0	1	1	7321.04	0.251401	0.0843556	0	1	1
ENSMUSG00000001380.7	14357.9	15672	13542.5	11965.5	9859.74	9867.94	9879.38	9245.65	13290.9	14870.2	14627.1	13562	8373.92	10816.3	9257.37	8674.3	11809.1	-0.60609	0.0324816	0	1	1	11809.1	-0.73345	0.0325174	0	1	1
ENSMUSG00000001383.9	12093.8	13782.9	13221.8	12047.6	9428	9260	9702.63	8967.65	10221.8	11418.9	11088	10178.7	6352.56	7791.53	7322	6328.77	9979.48	-0.492351	0.047815	0	1	1	9979.48	-0.661746	0.0481019	0	1	1
ENSMUSG00000001403.13	20981.3	24425.6	24372.3	21861.7	19452.4	19048.8	21713.3	19869.8	18579	21058.5	21526.6	19806.7	13437.9	16171.8	16150.9	12741.8	19573.7	-0.299395	0.0678472	0	1	1	19573.7	-0.602768	0.0679423	0	1	1
ENSMUSG00000001415.10	22199.2	23343.1	24161.2	21669.7	24971.5	24541.1	25543.6	23722.5	18166.7	20863.7	22721.6	20786.1	22510	30508.8	26485.7	25406.2	23608.6	0.115712	0.0512175	0	1	1	23608.6	0.436107	0.0512317	0	1	1
ENSMUSG00000001416.13	80089.6	85145.4	73472.5	67241.5	53379.3	52595.1	54791.8	50157.4	63685.2	68103.4	67709.6	64376.5	42794.3	52962.8	49114.1	42602.2	60916.6	-0.623026	0.0405092	0	1	1	60916.6	-0.624143	0.0405386	0	1	1
ENSMUSG00000001418.13	4590.13	4848.63	4641.49	4504.94	7481.37	7114.93	6691.69	6331.6	4764.66	5658.74	5118.48	4581.8	6673.16	9492.64	8245.14	7764.29	6071.59	0.432489	0.0571649	0	1	1	6071.59	0.481704	0.057005	0	1	1
ENSMUSG00000001419.17	4150	4369	4430.01	3870	7399.99	7739	7101	6725.99	6277.01	7183	6751	6230	8187	10750	9342	8821.01	6800.14	0.675396	0.0453317	0	1	1	6800.14	0.418272	0.0446601	0	1	1
ENSMUSG00000001420.13	1378.37	1500.29	1773.47	1670.18	1431.44	1480.06	1695.75	1502.35	899.303	1062.92	1050.19	1086.07	601.263	863.737	678.964	619.537	1180.1	-0.0389214	0.0718545	0	1	1	1180.1	-0.355262	0.075933	0	1	1
ENSMUSG00000001424.14	17601.5	19508.7	20151.5	18282.3	22666.4	23137.6	22954.7	21473.1	28323.2	29499.8	26817.2	25899.3	20220.4	24677.5	22780.9	19862.7	22734.2	0.141183	0.0545158	0	1	1	22734.2	-0.46275	0.0544439	0	1	1
ENSMUSG00000001435.15	43407	48127	48371	43155	85737	85857	103998	91645.6	37068	40467	42568	40363	76364.6	91194.5	87707.1	73902	63675.7	0.804346	0.0705728	0	1	1	63675.7	0.844586	0.0705891	0	1	1
ENSMUSG00000001436.15	2034	2014	2420	2061	1953	1911	1977	1796	2406.01	2918	2991	2760	2089	2891	2251	2398	2289.13	-0.073501	0.0783198	0	1	1	2289.13	-0.116508	0.0776152	0	1	1
ENSMUSG00000001440.5	143904	154339	142655	126516	100620	106119	110669	103202	130219	148490	145859	134395	98172	124743	109395	99206	123877	-0.506558	0.0302647	0	1	1	123877	-0.446749	0.0302643	0	1	1
ENSMUSG00000001441.13	26578.5	27257.7	20812.3	17967.6	14518.2	15093.4	15577.6	14784.7	21791.2	23659.2	22921.3	21806.5	14631.3	19231	16974	16027.9	19184.9	-0.529732	0.0664346	0	1	1	19184.9	-0.361586	0.0664127	0	1	1
ENSMUSG00000001444.2	57	59	93	64	40	28	35	26	105	89	75	63	21	39	28	44	54.9883	-1.18367	0.267233	-0.687313	0.491885	1	54.9883	-1.46646	0.264192	-1.76562	0.0774601	1
ENSMUSG00000001445.10	6999.84	7597.03	7545.94	6459.37	6268.99	6217.66	6163.35	5787.27	6902.77	7554.26	7367.94	6988.93	4883.3	6298.47	5654	4982.4	6504	-0.324156	0.033705	0	1	1	6504	-0.533513	0.0338583	0	1	1
ENSMUSG00000001467.5	3460.35	3834.23	4804.14	4191.68	3775.95	3665.65	3579.91	3321.72	6672.59	7901.79	6635.4	6518.26	3255.08	4321.75	3284.23	3077.32	4556.66	-0.364911	0.0907971	0	1	1	4556.66	-1.13208	0.0905399	-1.45881	0.144619	1
ENSMUSG00000001472.17	15533	16975	17378	15818	18653	18773	18769	17774	20748	23836	22568	21060	15092	19864	17643	16447	18591.7	0.0450306	0.0467016	0	1	1	18591.7	-0.53714	0.0466398	0	1	1
ENSMUSG00000001473.7	6120	6547	5184.13	4703	2823.01	2758.03	2674.01	2283.01	8638.92	9116	7793.11	7246.65	3021	4081.01	3273	2937.23	5003.31	-1.19101	0.076818	-2.48657	0.012898	0.47041	5003.31	-1.43605	0.0763674	-5.70993	1.13023e-08	9.58513e-07
ENSMUSG00000001482.15	7442.56	7638.66	8575.24	7782.76	8618.65	8291.98	8436.33	8071.26	7491.78	8903.22	8493.76	7660.46	6885.06	9150.01	7747.97	7098.6	8024.45	-0.0564811	0.0575729	0	1	1	8024.45	-0.219551	0.0576053	0	1	1
ENSMUSG00000001493.9	67	101	172	146	61	51	73	92	125	152	174	194	21	10	12	8	93.9859	-0.917935	0.314362	0	1	1	93.9859	-3.76694	0.361463	-7.65482	1.9358e-14	3.46426e-12
ENSMUSG00000001494.6	0	4	10	11	5	5	10	8	4	2	1	6	7	5	12	5	6.00697	0.0336454	0.738264	0	1	1	6.00697	1.02384	0.786857	0.030302	0.975826	1
ENSMUSG00000001496.15	5.09921	6.0368	7.28181	13.0518	5.03235	5.06398	5.04594	6.18335	0	0	1.00754	0	3.02018	6.57242	4.07091	2.1154	4.26073	-0.691485	0.619469	0	1	1	4.26073	3.6028	1.17925	2.20717	0.0273018	0.489356
ENSMUSG00000001497.18	13.5364	11.6005	6.39349	12.5689	13.4566	24.4106	10.5388	10.2629	2.13476	1.03125	10.5802	5.3685	7.04455	5.1103	9.04966	3.37047	9.71624	0.329231	0.606501	0	1	1	9.71624	0.181442	0.694916	0	1	1
ENSMUSG00000001504.10	248	231	266	218	310	365	240	274	120	159	171	139	190	268	228	245	228.93	0.244421	0.142567	0	1	1	228.93	0.38082	0.14905	0	1	1
ENSMUSG00000001506.10	192	203	157	158	83	94.4434	68.318	57.271	166	133	133.495	139	84	92	76.7108	70	125.191	-1.41645	0.299661	-1.38975	0.164606	1	125.191	-0.931587	0.300174	0	1	1
ENSMUSG00000001507.16	5449	6125	8381	7430	10630	11301	10358	9543	7499	9715	9983	8385	10204	13054	10637	9352.01	9184.12	0.505432	0.123408	0	1	1	9184.12	0.123982	0.123335	0	1	1
ENSMUSG00000001508.15	3	5	9	4	6	3	5	0	5	2	9	6	1	5	7.00001	2	4.62869	-1.10278	0.830039	-0.12383	0.90145	1	4.62869	-0.0478826	0.838621	0	1	1
ENSMUSG00000001510.8	83	77	96	67	54	65	52	61	131	126	81	97	45	61	54	51	75.7835	-0.571553	0.194764	0	1	1	75.7835	-1.17717	0.192888	-0.918525	0.358344	1
ENSMUSG00000001517.14	6250.99	6640.92	6228.95	5308.99	9935.98	10002	10257	9671.89	7969.99	9710.96	9394.99	8613.99	10186	12500.9	11885	10221.9	8976.55	0.645848	0.0576053	0	1	1	8976.55	0.333444	0.0573232	0	1	1
ENSMUSG00000001518.12	2345.08	2544.72	2548.43	2313.96	3078.27	3000.8	3414.29	3110.55	1854.28	1952.67	2009.15	1891.17	2629.35	3566.92	3195	2887.99	2633.15	0.285093	0.0762287	0	1	1	2633.15	0.57574	0.076642	0	1	1
ENSMUSG00000001520.12	130.326	127.226	105.368	79.2283	109.272	158.525	133.449	115.743	85.7226	131.876	151.644	146.195	290.698	388.934	366.929	376.243	175.019	0.0747275	0.186747	0	1	1	175.019	1.15931	0.177644	0.896809	0.369821	1
ENSMUSG00000001521.12	4788.37	5020.88	5061.42	4433.93	6707.31	6573.08	6440.82	6063.55	7117.58	8240.56	7753.56	6925.74	6328.47	8469.82	7620.37	6969.02	6506.94	0.39857	0.0394617	0	1	1	6506.94	0.0132923	0.0388515	0	1	1
ENSMUSG00000001524.14	5970.18	6438.09	6344.05	5666	5182.32	5097.11	5144.33	4782	6211.08	6685.1	6692.04	6067.16	4199.08	5542.4	5123.45	4619.04	5637.62	-0.431995	0.0399327	0	1	1	5637.62	-0.511075	0.0399397	0	1	1
ENSMUSG00000001525.10	186491	203052	188213	172967	194556	191802	195006	180456	169797	183914	175086	166637	139176	172063	162063	131978	176190	-0.0799084	0.0419076	0	1	1	176190	-0.327638	0.041919	0	1	1
ENSMUSG00000001542.7	3508.49	3849.35	3781.5	3638.53	4710.61	5276.03	5083.68	5156.54	3546.49	4264.54	4238.1	3902.47	3558.73	4290.84	3830.27	3429.43	4137.35	0.479343	0.0840349	0	1	1	4137.35	-0.104066	0.0841856	0	1	1
ENSMUSG00000001552.14	13176.9	14136.9	19304.9	18152	29980.8	29290.7	32822	30919.8	22770.1	26234	28821.2	26641.1	27818.2	37183.3	34614	30886.1	26224.4	0.841047	0.122987	0	1	1	26224.4	0.194825	0.122935	0	1	1
ENSMUSG00000001555.10	2702.23	2736.12	1939.02	1733.51	1392.85	1380.87	1533.29	1317.2	6631.94	8406.57	8311.42	6793.86	5040.03	7674.54	5867.28	6324.02	4377.8	-0.895465	0.104384	0	1	1	4377.8	-0.47959	0.102221	0	1	1
ENSMUSG00000001558.5	79	78	80	62	62	75	57	60	65	60	69	70	95	123	121	97	78.1238	-0.219533	0.16597	0	1	1	78.1238	0.718163	0.158274	0	1	1
ENSMUSG00000001566.9	12	13	7	10	23	25	14	19	18	27	21	25	24	15	12	8	17.2314	0.906384	0.406526	0	1	1	17.2314	-0.728783	0.384041	0	1	1
ENSMUSG00000001569.10	8199.99	8701.36	7267.02	6357.57	5917.6	6020.23	6147.9	5778.09	7023.25	7875.4	7727.8	7261.72	5236.27	6757.64	6211.97	5682.33	6786.53	-0.390634	0.0690975	0	1	1	6786.53	-0.478892	0.0691113	0	1	1
ENSMUSG00000001576.15	5141	5254.99	4999	4411	7483	7564	8302	7652.99	8457	10045	9935.01	9058.99	8968	11271	10593	9433	7895.38	0.42613	0.0511028	0	1	1	7895.38	-0.0224141	0.0504655	0	1	1
ENSMUSG00000001583.13	558.944	655.981	667.842	682.75	924.153	934.204	1330.52	1237.69	1243.38	1431.97	1192.27	1177.11	1582.55	2526.69	1953.98	2141.02	1251.35	0.734416	0.140665	0	1	1	1251.35	0.587691	0.138492	0	1	1
ENSMUSG00000001588.12	903	1001	1092	975	1159	1180	1254	1232	1735	1827	1673	1548	1471	2144	1967	1865	1428.77	0.141125	0.0772333	0	1	1	1428.77	0.0285819	0.0748294	0	1	1
ENSMUSG00000001604.14	12161	13539	14097	12767	15511	15124	15623	13802	10123	11422	12432	11270	10843	13250	14045	11411	12963	0.0595275	0.0718988	0	1	1	12963	-0.0270722	0.0719969	0	1	1
ENSMUSG00000001622.15	27.0204	18.2205	22.7748	21.9449	6.04658	12.4333	5.20005	7.08492	0	2	4.07891	1.04034	2.00422	6.30723	3.93424	2.13638	8.59188	-1.5733	0.483252	-1.18633	0.23549	1	8.59188	0.849453	0.770826	0	1	1
ENSMUSG00000001627.12	6444	7234	8591	7674	9098	9355	10353	10038	11815	13373	13445	12556	9926	12974	12029	11312	10337.8	0.205948	0.0852039	0	1	1	10337.8	-0.286779	0.0849859	0	1	1
ENSMUSG00000001630.13	2505.47	2660.96	2546.83	2310.6	2326.64	2458.72	2433.72	2289.99	2348.48	2858.99	2657.52	2458.1	1995.21	2675.3	2179.18	2054.05	2426.47	-0.213251	0.0429042	0	1	1	2426.47	-0.284157	0.04303	0	1	1
ENSMUSG00000001632.16	7911.71	8591.81	7404	6720.35	9094.32	9227.68	9282.08	8472.11	7679.78	8924.94	8044.67	7656.07	7879.28	10362.4	8991.29	8188.31	8365.98	0.140341	0.0388155	0	1	1	8365.98	0.00301143	0.0387898	0	1	1
ENSMUSG00000001642.18	55747.8	60035.9	51725.8	48824.3	38697.6	36653.3	35859.3	33521.5	48416.3	50658.8	53198	51056.9	21656	24738.7	26813	19843.1	41648.8	-0.685615	0.0706069	0	1	1	41648.8	-1.26891	0.0706686	-3.80525	0.00014166	0.00545884
ENSMUSG00000001655.6	197	231	150	151	583	635	480	503	170	258	273	199	1239	1966	1424	1560	600.725	1.50321	0.131745	3.81956	0.000133691	0.00896241	600.725	2.65132	0.127291	12.9728	1.74571e-38	1.94022e-35
ENSMUSG00000001656.3	2	7	18	13	35	51	42	36	15	23	38	22	84	114	87	131	43.4809	1.92327	0.383436	2.40788	0.0160455	0.551844	43.4809	1.9691	0.330217	2.93473	0.00333843	0.0873577
ENSMUSG00000001657.7	1	2	5.1113	0	6.05986	6	4.01084	5	2.00448	2.00867	5.02481	6.01778	18	22.1216	14.1092	23	7.34401	1.45994	0.728262	0.631558	0.527675	1	7.34401	2.23864	0.575487	2.15234	0.0313709	0.548393
ENSMUSG00000001661.5	1	5	5	0	2	5	4	3	2	5	2	5	8	10	8	12	5.13137	-0.182526	0.813969	0	1	1	5.13137	1.62512	0.732755	0.853108	0.393599	1
ENSMUSG00000001663.10	287	332	353	355	332	289	371	323	307	298	348	359	304	312	384	282	328.612	-0.0990739	0.14039	0	1	1	328.612	-0.153303	0.14062	0	1	1
ENSMUSG00000001665.11	274.465	278.157	382.634	397.638	452.158	503.567	541.082	491.302	981.521	1078.14	969.93	958.318	782.484	1008.14	961.235	868.217	683.359	0.492945	0.142079	0	1	1	683.359	-0.215977	0.136718	0	1	1
ENSMUSG00000001666.8	5884.37	6248.44	6034.54	5541.48	5743.12	5358.42	5724.31	5093.6	5620.63	6331.93	5910.46	5437.95	3948.3	4998.22	4920.76	4197.18	5458.6	-0.224034	0.0476957	0	1	1	5458.6	-0.509219	0.0479333	0	1	1
ENSMUSG00000001670.13	2	4	8	5	3	2	0	1	0	0	0	0	0	0	0	0	1.61649	-1.60485	1.30872	-0.462168	0.643961	NA	1.61649	0	1.83027	0	1	NA
ENSMUSG00000001672.14	81	98	55	75	91	108	125	127	225	240	227	219	361	600	509	535	229.646	0.436791	0.17257	0	1	1	229.646	0.88343	0.147048	0	1	1
ENSMUSG00000001674.11	29431.5	32197.4	30445.2	27764.3	20746.8	20353.4	21656.8	20400.9	37144.8	40101.3	40490.3	38719.6	25192.3	32518.9	30422.3	26530.3	29659.2	-0.606225	0.0385457	0	1	1	29659.2	-0.554085	0.0384052	0	1	1
ENSMUSG00000001687.15	8876.99	9585.69	9057	8329	9182	9517	9562	9364.01	7864	8932.01	9810.99	8858.99	10459	14709	12344	11811	9842.92	0.0266039	0.0694245	0	1	1	9842.92	0.405327	0.0693362	0	1	1
ENSMUSG00000001700.10	520.053	549	569	495.035	514.001	443	660.999	586	356	395	360	365	229	334	319	252	438.157	-0.0225323	0.119492	0	1	1	438.157	-0.557985	0.124987	0	1	1
ENSMUSG00000001707.8	8488	9674	9426	8362.99	5802	5899	6477	5975	5783	6278	5964	5947	3736	4917	4478.99	3939	6482.46	-0.917413	0.0667041	0	1	1	6482.46	-0.692824	0.0671979	0	1	1
ENSMUSG00000001729.14	2771	2978	3173	2944	1929	1963	2239	2205	4246.01	4553	4414	4073	1632	2429	2189	2242	2879.71	-0.643484	0.0791928	0	1	1	2879.71	-1.08744	0.0788358	-1.10909	0.267392	1
ENSMUSG00000001739.14	21	22	35	19	20	21	25	29	29.0001	27	35	28	23	47	26	25	27.3479	0.211001	0.347682	0	1	1	27.3479	0.0439717	0.335098	0	1	1
ENSMUSG00000001741.12	34.1567	45.1804	25.0821	33.0556	26.3382	20.4589	33.3505	26.0246	47.8233	47.0079	32.8952	52.1724	47.0551	79.587	54.9213	54.7523	41.0227	-0.498014	0.266919	0	1	1	41.0227	0.263944	0.237972	0	1	1
ENSMUSG00000001750.16	698.848	705.74	640.087	660.944	580.876	604.833	616.508	569.828	1107.15	1333.32	1152.3	991.945	980.291	1517.57	1201.9	1280.51	917.845	-0.328341	0.07313	0	1	1	917.845	-0.0234495	0.0676904	0	1	1
ENSMUSG00000001751.9	101	129	83.0001	65	146	127	93	139	172	245	182	182	294	469	379	383	196.095	0.430531	0.200446	0	1	1	196.095	0.869911	0.18606	0	1	1
ENSMUSG00000001755.12	1337	1258	1326	1106	1785	1800	1564	1426	1897	2361	1922	1864	1596	2192	1859	1912	1690.52	0.36351	0.0772541	0	1	1	1690.52	-0.204158	0.0759887	0	1	1
ENSMUSG00000001761.7	2453.93	2529.68	2071.04	1884.12	3156.39	3252.07	2979.98	2655.61	4848.4	5643.48	5396.32	5042.21	4502.23	5886.32	4889.52	4629.06	3827.78	0.324726	0.0532224	0	1	1	3827.78	-0.198994	0.0512878	0	1	1
ENSMUSG00000001763.14	298.154	329.964	248.665	193.807	226.608	237.756	212.503	227.282	652.006	737.196	593.982	608.562	439.655	641.441	497.315	417.618	411.858	-0.27474	0.110886	0	1	1	411.858	-0.545417	0.0994647	0	1	1
ENSMUSG00000001767.5	10690.7	11480	9605.53	8530.13	8284	8454.6	8358	7858.36	7617.82	8923	8820.96	8015.95	6435.01	9040	7638	6968.96	8554.93	-0.388879	0.0452325	0	1	1	8554.93	-0.268862	0.0454257	0	1	1
ENSMUSG00000001768.16	539.46	558.587	491.584	490.498	992.182	1090.33	1102.51	1095.25	1109.11	1061.31	1212.42	1105.11	1236.22	1529.81	1345.21	1351.28	1001.61	0.833905	0.0892558	0	1	1	1001.61	0.206763	0.0856031	0	1	1
ENSMUSG00000001773.14	18	22	62	55	46	44	14	22	8	6	5	8	15	24	17	11	22.2189	-0.516327	0.482051	0	1	1	22.2189	0.678114	0.557431	0	1	1
ENSMUSG00000001774.8	10850.8	12340.9	10258.5	8641.73	7287.65	7385.03	7471.24	7330.63	9964.61	11715.5	11964.2	10489.6	8862.89	12296.6	10290.3	10362.5	9818.51	-0.476543	0.0487037	0	1	1	9818.51	-0.0236776	0.0484662	0	1	1
ENSMUSG00000001783.3	17643	19187	18792	16885	17724	17088	17717	16638	20081	21750	21901	20292	15614	19920	17904	16242	18484.9	-0.161784	0.0365849	0	1	1	18484.9	-0.395317	0.0365312	0	1	1
ENSMUSG00000001785.13	14617.1	15728	14460	13255	9809.43	9925	10414	9938.58	12180	13764	13823	12853	8954	11121	10273.1	8980	11938	-0.623909	0.0450165	0	1	1	11938	-0.513134	0.0450725	0	1	1
ENSMUSG00000001786.14	1292	1446	1592	1458	1895	1859	1986	1990	1730	2054	2092	1937	1928	2779	2402	2396	1911.71	0.370669	0.0846407	0	1	1	1911.71	0.130293	0.0838089	0	1	1
ENSMUSG00000001794.13	15634	16578	17632	16504	21586	20773	19728	17860	28029.9	33561	31363	27922	15741	22407	18118	17140	21256.2	0.206173	0.0602666	0	1	1	21256.2	-0.796298	0.0601717	0	1	1
ENSMUSG00000001802.16	170.239	179.731	154.009	132.004	398.001	412.988	438	367.01	280.001	270.066	197.012	223.005	373.475	540.181	396	467.925	308.053	1.20876	0.154082	1.35486	0.175463	1	308.053	0.798064	0.149971	0	1	1
ENSMUSG00000001819.4	110	161	215	176	158	161	118	125	43	49	73	93	29	31	35	23	101.723	-0.34362	0.245836	0	1	1	101.723	-1.25944	0.281691	-0.921012	0.357044	1
ENSMUSG00000001823.5	4	0	2	3	2	1	0	1	0	0	1	2	0	0	0	1	1.11167	-1.29501	1.46242	-0.201726	0.840131	NA	1.11167	-1.43843	1.7665	-0.248194	0.803984	NA
ENSMUSG00000001827.12	5610.01	5928	6552.01	6001	5189.99	5160.01	4827.01	4603	3091.01	3669	3737	3266	3008	4071	3184	2921	4455.15	-0.420937	0.0692775	0	1	1	4455.15	-0.152986	0.0701372	0	1	1
ENSMUSG00000001829.17	7893.25	8183.25	8075.54	7402.38	6514.18	6070.66	6799.26	6186.67	7571.47	8555.65	8242.74	7517.06	5116.41	6577.75	5980.78	5392.26	7106.3	-0.50612	0.0525002	0	1	1	7106.3	-0.716696	0.0525884	0	1	1
ENSMUSG00000001833.17	17212.4	18754.7	15871.1	13600.5	11640.3	12027.4	11427.1	11197.2	13188.4	14985.4	14246.5	13172.1	9699.47	13100.6	10627.1	9722.27	13203.5	-0.589808	0.0405839	0	1	1	13203.5	-0.491107	0.0406985	0	1	1
ENSMUSG00000001844.10	2086	2140	2625	2350	2890	2922	2876	2707	2059	2323	2354	2136	1961	2506	2187	1985	2381.7	0.205584	0.0793106	0	1	1	2381.7	-0.168163	0.079752	0	1	1
ENSMUSG00000001847.14	16836.3	17843.1	17372.2	15456.8	17077.7	17448.5	16896.4	16053.1	20215.8	22985.5	23143.4	21005.5	15965.3	21269	18750.1	16811.4	18415.9	-0.104876	0.0316232	0	1	1	18415.9	-0.365441	0.0314804	0	1	1
ENSMUSG00000001855.15	18119.8	17583.8	15779.8	14157.6	15235.8	16282	16189.7	15381	16831.3	20267.6	20441	17999.4	14663.4	19069.4	17043.2	15677.2	16882.9	-0.0983687	0.0503035	0	1	1	16882.9	-0.276469	0.0502478	0	1	1
ENSMUSG00000001864.13	382	394	418	425	356	301	379	326	965	986	866	780	408	460	486	358	509.246	-0.33491	0.1371	0	1	1	509.246	-1.16869	0.133419	-1.26433	0.20611	1
ENSMUSG00000001870.16	674.533	645.903	598.061	598.302	854.72	890.985	816.135	876.307	704.035	683.528	628.729	599.283	648.425	895.847	771.306	736.556	725.393	0.235144	0.113484	0	1	1	725.393	0.170704	0.113686	0	1	1
ENSMUSG00000001891.16	2630.01	2860	3246	2900	2553	2608	2600	2562	2459	2784	2586	2590	1891	2713	2254	2146	2595.86	-0.267078	0.0721768	0	1	1	2595.86	-0.344705	0.0725494	0	1	1
ENSMUSG00000001901.15	433	392	310	284	499	457	480	456	523.248	654	566	541	638	767	722	659	519.306	0.3251	0.0911491	0	1	1	519.306	0.181563	0.0860142	0	1	1
ENSMUSG00000001909.16	13957	15117.1	13774.9	12290.2	15184	14973.6	15134.2	13934.4	9320.88	10125.9	10534.7	9920.09	12381.8	16762.6	15582.7	14203.4	13270	-0.0732672	0.0444562	0	1	1	13270	0.455906	0.0446236	0	1	1
ENSMUSG00000001910.4	41414.6	45257.8	39746.2	35457.6	41782	42458.1	44004.2	40732.4	38564.3	44102.5	44213.3	41125.5	33818.5	40714.7	39445.9	33597.3	40413.1	-0.0294198	0.0421748	0	1	1	40413.1	-0.31038	0.0421911	0	1	1
ENSMUSG00000001911.16	146.009	158	111.004	103	201.097	197.031	222.28	194.111	51.0091	49	46	70.0076	150.093	205.752	170.025	147.126	131.527	0.191587	0.179472	0	1	1	131.527	1.2593	0.195936	1.32341	0.185699	1
ENSMUSG00000001918.17	5589	5698	4666	3933.96	3442	3407	2761	2477	12002	16309	14992	12272	14793	26643	17195	20835	10205.3	-0.701459	0.125984	0	1	1	10205.3	0.354219	0.125133	0	1	1
ENSMUSG00000001924.15	70029	75406.1	69391	62557.1	64381.5	64080.8	65773.9	62073.1	68647.4	76355.6	73468.8	68866.6	53822.8	68500.1	63034.8	55960.9	66510.6	-0.20666	0.0282755	0	1	1	66510.6	-0.38217	0.0282809	0	1	1
ENSMUSG00000001930.17	660.152	674.134	666.031	566.03	1002.53	1092.65	1160.5	1004.82	648.98	715.323	655.061	654.031	802.066	968.224	910.579	830.01	800.713	0.381166	0.093667	0	1	1	800.713	0.136711	0.0940463	0	1	1
ENSMUSG00000001942.8	788.052	785.021	877.973	803.596	1889.35	1897.78	1642.99	1602.84	1185.49	1480.69	1356.61	1194.93	1873.44	2484.84	1941.68	2042.71	1470.23	1.01664	0.0913836	0.182112	0.855495	1	1470.23	0.558427	0.0898295	0	1	1
ENSMUSG00000001943.8	209	238	228	206	272	337	298	283	114	83	83	94	91	82	111	67	179.451	0.273637	0.146005	0	1	1	179.451	-0.265762	0.169407	0	1	1
ENSMUSG00000001946.14	253	345	344	352	353	357	379	377	62	70	74.0001	86	60	45	67	50	211.731	0.0482192	0.173199	0	1	1	211.731	-0.634992	0.208306	0	1	1
ENSMUSG00000001948.10	102	107	165.693	131	176.182	235.234	178	203	70	69.4633	57	61	121.693	159	140.421	102.296	128.863	0.511979	0.181844	0	1	1	128.863	0.844374	0.196129	0	1	1
ENSMUSG00000001962.8	4851	5507	5105	4655	4844	4860	4869	4475	5036	5745	5419	5118	4777	6490	5881	5379	5175.4	-0.178397	0.0350216	0	1	1	5175.4	-0.0361443	0.0347065	0	1	1
ENSMUSG00000001964.14	6241.31	6606.89	6452.45	5765.09	5909.51	5706.08	5619.73	4931.92	6630.52	7560.81	7423.6	6544.37	4822.01	6606.28	5748.88	5184.82	6088.3	-0.171962	0.0424948	0	1	1	6088.3	-0.299561	0.0423862	0	1	1
ENSMUSG00000001983.7	1457	1467	1188	1079	1021	898	916	823	1463	1658	1415	1447	1030	1287	1120	962	1205.72	-0.600125	0.0766279	0	1	1	1205.72	-0.577166	0.0756605	0	1	1
ENSMUSG00000001985.9	3854.2	3969.98	3852.4	3407.61	10235.9	11437.9	9915	9089.21	9078.09	11517.9	12201.2	10480.9	21099.8	29407.4	23743.3	23284	11965.3	1.33583	0.0600754	5.59017	2.26847e-08	3.15153e-06	11965.3	1.0463	0.0590694	0.783747	0.433188	1
ENSMUSG00000001986.16	156.091	158.91	110.269	79.9724	62.6	62.4971	68.5983	64.1601	27.3292	42.9874	52.8322	46.6991	27.1906	29.3468	47.3905	36.0209	66.1799	-1.16571	0.242687	-0.682808	0.494728	1	66.1799	-0.236005	0.272991	0	1	1
ENSMUSG00000001988.9	97.9999	97	69	45	51	40	57	35	28.0001	35	37	30	43.0001	52	40	48.0001	51.9667	-0.909385	0.305551	0	1	1	51.9667	0.126282	0.321218	0	1	1
ENSMUSG00000001995.9	2256	2417	2659	2372	5538	5875	6014	5560	5782	6960	6347	5759	9944	14539	11254	11239	6387.95	1.14844	0.0627164	2.36683	0.0179411	0.608124	6387.95	0.789485	0.0612959	0	1	1
ENSMUSG00000001998.15	2344.16	2482.78	2188.75	1850.03	1876.93	1952.81	1925.44	1868.41	2494.47	3154.54	2947.28	2693.45	1999.1	2786.27	2230.36	2142.99	2297.13	-0.234159	0.0531483	0	1	1	2297.13	-0.273127	0.0522487	0	1	1
ENSMUSG00000001999.15	743	668	660	632	534	449	415	419.999	985	1134	1059	1005	616	839	697	649	718.521	-0.604547	0.0835218	0	1	1	718.521	-0.705344	0.0794305	0	1	1
ENSMUSG00000002006.12	13610	15302	15807	13966	17627	17450	22124	19485	12556	13899	14759	14282	12973	14533	15318	11837	15348.3	0.284674	0.0914831	0	1	1	15348.3	-0.14735	0.0915553	0	1	1
ENSMUSG00000002007.5	21	11	8	13	21	19	10	11	3	5	7	8	11	7	9	7	11.2234	-0.203781	0.563127	0	1	1	11.2234	0.458888	0.64085	0	1	1
ENSMUSG00000002010.17	11446	12217	11313	10256	15438	14718	14612	13241	11011	12120	11377	10560	12087	16379	14495	13166	12686.3	0.200918	0.0365343	0	1	1	12686.3	0.11493	0.0365571	0	1	1
ENSMUSG00000002012.13	124	137	128	119	402	383	343	339	303	284	240	215	502	661	559.001	588	327.158	1.3656	0.124408	2.93873	0.00329555	0.145896	327.158	1.12147	0.113443	1.07073	0.28429	1
ENSMUSG00000002014.12	5525	6033	5225	4724	5753	5456	5184	4835.99	3710	4116	3835	3661	4274.99	5860	5074	4861	4870.29	-0.133927	0.0457389	0	1	1	4870.29	0.262032	0.0462325	0	1	1
ENSMUSG00000002015.5	8525	9254	8736	8222	7791	7448	7272	6834	8668	9831	9611	8648	8102	11358	9502	8981	8659.11	-0.346062	0.0388243	0	1	1	8659.11	-0.0912864	0.0385821	0	1	1
ENSMUSG00000002017.10	7257.99	7763.98	7460	6791	5399.99	5567.99	5821	5541.98	7707	8559	7946	7631	3970	4809	4348.99	3791	6284.83	-0.454918	0.0327077	0	1	1	6284.83	-0.935353	0.0330844	0	1	1
ENSMUSG00000002020.15	192.708	174.555	102.995	98.4889	127.628	133.692	128.313	120.826	109.407	78.6494	62.4467	85.668	101.831	140.463	91.9807	115.873	117.52	0.0205478	0.263504	0	1	1	117.52	0.468235	0.269056	0	1	1
ENSMUSG00000002028.13	9062	8276	5856	4759	11257	11450	10855	9996	7157	9726	8602	7066	12772	19537	13699	13924	10058.9	0.619359	0.133122	0	1	1	10058.9	0.738072	0.133035	0	1	1
ENSMUSG00000002031.12	3624.7	3657.04	3527.89	3251.84	5059.91	4842.78	4780.31	4536.62	3978.33	4550.94	4213.95	3894.98	4530.84	6335.54	5438.01	5101.18	4430.78	0.36556	0.0361926	0	1	1	4430.78	0.239009	0.0357373	0	1	1
ENSMUSG00000002032.17	35	39	24	30	87	80	87	64	114	146	118	107	202	310	269	275	116.228	1.09841	0.194679	0.505484	0.613219	1	116.228	0.750312	0.145516	0	1	1
ENSMUSG00000002033.14	2.04512	5.01382	4	0	0	1	2	1.01081	1	6.10182	7	2	2	0	1.01373	1.02871	2.59916	-2.22003	1.22358	-0.997101	0.318716	1	2.59916	-2.28403	1.198	-1.07181	0.283804	1
ENSMUSG00000002043.17	776	866.001	660	617	830	769	715	690	647.999	681.001	556	564	903	1224	1104	1087	782.808	-0.163278	0.0901401	0	1	1	782.808	0.582903	0.0897321	0	1	1
ENSMUSG00000002052.6	31396.2	33322.2	31388	27853.9	42742.5	45844.2	44955.6	41937.7	30068.2	33982.5	34181.6	31409.4	34346.3	44221.2	37658.2	33221.7	35968.1	0.408431	0.0315194	0	1	1	35968.1	0.0830749	0.0315423	0	1	1
ENSMUSG00000002055.9	7304.58	7655.16	7530.74	6711.17	8769.76	8870.74	8490.16	8195.26	9168.98	10394.8	9404.53	9004.58	8548.48	11204.4	10068.2	9152.91	8750.24	0.147524	0.0497252	0	1	1	8750.24	0.113509	0.0494912	0	1	1
ENSMUSG00000002057.4	12.0744	11	16	12	19	8	6.00001	10	3	7.00001	14	19	9	12	7.00001	8.00001	10.8727	-0.343528	0.509785	0	1	1	10.8727	-0.390701	0.526731	0	1	1
ENSMUSG00000002058.13	1039	1141	1154	1027	1082	1108	1111	1045	2260	2418	2052	2044	1181	1456	1291	1183	1413.72	-0.0781239	0.0663654	0	1	1	1413.72	-0.898514	0.063987	0	1	1
ENSMUSG00000002059.18	1613.14	1752.45	2027.44	1791.23	1725.98	1640.61	1779.3	1704.62	2379.36	2463.08	2581.73	2442.14	1616.67	2189.14	1883.08	1791.6	1966.93	-0.212425	0.0717683	0	1	1	1966.93	-0.547224	0.0710593	0	1	1
ENSMUSG00000002064.10	2125.11	2451.24	2144.57	1944.37	3240.3	3173.5	3122.24	2859.07	2126.25	2449.49	2247.93	1971.23	2880.25	3927.71	3254.45	3139.68	2676.56	0.488474	0.0457291	0	1	1	2676.56	0.547692	0.0455953	0	1	1
ENSMUSG00000002068.16	22560	24579.2	28267	26209	11976	11951	13406	11991	27695	29885	30773	29233	4507	5575	5276	4351	18390.9	-1.15315	0.0812543	-1.88479	0.0594582	1	18390.9	-2.68438	0.0816336	-20.6334	1.3773e-94	4.84742e-91
ENSMUSG00000002076.12	8633	8919	8171.62	7456.01	8134.99	7814.01	7529	7324.99	5052	5079.57	5286	5137	3664	4452	4222	3600.01	6327.74	-0.206109	0.0489372	0	1	1	6327.74	-0.49941	0.0499714	0	1	1
ENSMUSG00000002083.13	5057	4989	2620	2484	3096	2948	3378	3013	3887	3950	3589	3243	2841	4477	3982	3863	3589.23	-0.461866	0.198553	0	1	1	3589.23	-0.157582	0.198491	0	1	1
ENSMUSG00000002100.15	108	116	171	154	277	286	305	306	223	265	217	244	122	121	189	128	202.514	0.985653	0.181549	0	1	1	202.514	-0.877573	0.182577	0	1	1
ENSMUSG00000002102.15	22074	24588	25029	22413	21193	20813	21122.7	18858	24923	27621.1	27112	24858	19017	25225	22401	19631.2	22950.1	-0.298517	0.0463451	0	1	1	22950.1	-0.363743	0.0463102	0	1	1
ENSMUSG00000002103.15	1522.13	1427.68	1268.51	1073.35	2045.09	2179.92	2105.06	1927.94	1286.29	1632.78	1545.89	1320.52	2276.21	3265.08	2723.29	2686.23	1846.78	0.342283	0.107985	0	1	1	1846.78	0.65443	0.107554	0	1	1
ENSMUSG00000002104.11	44.5	55.5	52.5	37	39	31	49.4999	25.5	11.5	16.5	14	12.5	13.5	16	13.5	12.5	27.2248	-0.551886	0.264784	0	1	1	27.2248	-0.0547435	0.347264	0	1	1
ENSMUSG00000002105.15	699	706	530	443	542.999	537	591.278	480	533	699.001	597	570	720	1023	928.001	926.765	649.858	-0.14489	0.11562	0	1	1	649.858	0.418161	0.113873	0	1	1
ENSMUSG00000002107.18	547.755	524.822	498.184	471.912	710.786	757.826	679.73	697.547	273.847	320.632	277.222	291.918	378.389	618.667	373.18	444.108	482.463	0.271658	0.097656	0	1	1	482.463	0.270316	0.103616	0	1	1
ENSMUSG00000002108.10	24	55	65	61	37.0001	65	71	49	99	150	172	93.9999	140	212	146	154	98.0674	0.00507231	0.324595	0	1	1	98.0674	0.141078	0.305765	0	1	1
ENSMUSG00000002109.14	753.039	825.027	734.203	663.053	1917.63	1888.78	1529.8	1548.51	801.048	959.365	843.594	773.159	2175.04	3386.15	2723.81	2779.64	1464.32	1.07016	0.0794577	0.882978	0.377248	1	1464.32	1.51456	0.0782119	6.57903	4.73524e-11	5.71395e-09
ENSMUSG00000002111.8	70	57	57	39	89	99	61	76	30	46	59	50	121	147	133	139	79.8159	0.50117	0.276317	0	1	1	79.8159	1.45511	0.275362	1.65276	0.09838	1
ENSMUSG00000002129.11	33831	37031	33124	28521	20610	20848	22116	20475	28340	32388	32456	30462	19308	24087	23250	19683	26877.4	-0.792249	0.0543671	0	1	1	26877.4	-0.625455	0.0543728	0	1	1
ENSMUSG00000002147.18	3112	3033	2702	2469	2659	2506	2390	2474	3635	3988	3594	3335	3365	4467	3858	3671	3187.01	-0.277806	0.0537813	0	1	1	3187.01	0.110104	0.0527236	0	1	1
ENSMUSG00000002190.13	1900	2106	2260	1873	3205	3382	3051	2982	5864	6704	6095	5621	5697	7249	6285	5662	4366.23	0.501407	0.0569472	0	1	1	4366.23	-0.0732003	0.0546999	0	1	1
ENSMUSG00000002204.9	1086.04	1045.03	689.001	635.05	1176	1081	914.076	932	372.001	403.034	409.001	314	1063	1277.02	1196.01	986.001	838.011	0.0825922	0.133106	0	1	1	838.011	1.45913	0.135862	3.37934	0.000726592	0.0234609
ENSMUSG00000002205.16	2816.03	3279.22	3366.31	3084.92	3776.6	3738.21	4123.72	3642.66	2939.11	3355.01	3621.09	3157.68	3831.28	5490.76	4669.8	4456.45	3688.26	0.158968	0.0699076	0	1	1	3688.26	0.379563	0.069705	0	1	1
ENSMUSG00000002210.11	2664.87	2890.06	2994.43	2497.85	2550.58	2434.99	2711.29	2435.22	1608.84	1781.38	1868.71	1784.17	1971.38	2630.76	2504.76	2168.39	2338.49	-0.180482	0.0598619	0	1	1	2338.49	0.440462	0.0609257	0	1	1
ENSMUSG00000002221.11	9145.57	9706.94	9570.26	8267.26	11297.8	11517.3	11825.2	11084.7	11203.6	13013.4	12722.5	11647.5	11279.3	14883.2	13317.7	11979.4	11328.3	0.116517	0.052809	0	1	1	11328.3	-0.162144	0.0526332	0	1	1
ENSMUSG00000002222.14	12653	12947	11075	9497	13048	14709	13581	13006	14084	16963	15648	14446	14754	19076	15520	14697	14029.9	0.20264	0.0480625	0	1	1	14029.9	-0.0504216	0.0478879	0	1	1
ENSMUSG00000002227.15	14463	15320	18735	17085	19536	19357	20398	19528	12428	13626	14314	12997	9086	9669.99	11197	8406	14795	0.158325	0.100261	0	1	1	14795	-0.535211	0.100439	0	1	1
ENSMUSG00000002228.7	2175	2500	2482	2169	8281	7701	7207	6725	3016	3356	3553	3071	2798	3391.01	3668	3083	4037.93	1.53001	0.0772118	6.86438	6.67825e-12	1.74105e-09	4037.93	-0.0558353	0.077398	0	1	1
ENSMUSG00000002233.13	2102	2101	2087	1893	3566	3532	3430	3164	3990	4352	4403	4014	2269	3029	2640	2445	3057.03	0.655869	0.0427277	0	1	1	3057.03	-0.801709	0.0417793	0	1	1
ENSMUSG00000002249.21	395.442	398.658	467.802	435.804	1005.9	1083.1	1297.82	1197.06	240	308.024	305.267	257.999	662.073	1069	844.141	969.762	676.85	1.38876	0.140994	2.75729	0.00582826	0.238981	676.85	1.5369	0.143793	3.73386	0.000188564	0.00708525
ENSMUSG00000002250.16	2834.53	3166.23	2641.58	2382.21	2379.66	2370.93	2700.9	2498.27	4589.41	5316.53	5196.43	4645.55	3618.78	5010.81	4594.7	4306.03	3643.87	-0.273859	0.0617464	0	1	1	3643.87	-0.393466	0.060329	0	1	1
ENSMUSG00000002257.8	3336	3630	2557	2301	1908	1861	1811	1688	3507	4082	4157	3674	1411	2016	1704	1796	2639.15	-0.871452	0.0968645	0	1	1	2639.15	-1.36232	0.0967367	-3.74543	0.000180082	0.00681504
ENSMUSG00000002265.16	5451	5626	5523	4983.99	5333	5839	6810	6142	1597.8	1970	1916	1693	2387	2871	2690	2215	3956.5	0.08032	0.071707	0	1	1	3956.5	0.386984	0.0738667	0	1	1
ENSMUSG00000002266.17	194.154	149.138	134.083	103.751	64.576	75.2472	109.399	94.6292	48.3041	55.152	46.7776	33.4681	20.4058	30.048	12.6722	24.6371	90.2517	-1.08226	0.340089	-0.241885	0.808869	1	90.2517	-2.40399	0.376229	-3.73175	0.000190154	0.00713228
ENSMUSG00000002274.13	1673	1793	1913.76	1578	1604.9	1410	1421.69	1376	2366	2657	2621.63	2257	1117	1531.74	1399	1247	1770.94	-0.324949	0.0707529	0	1	1	1770.94	-1.17032	0.0703951	-2.41952	0.0155411	0.31375
ENSMUSG00000002279.19	483.297	552.118	707.034	593.036	1085.02	1040.01	1052.01	981.033	740.006	734.012	693.396	705.102	896.013	1157.03	1072.01	1018.32	830.025	0.561023	0.0804976	0	1	1	830.025	0.389706	0.0794403	0	1	1
ENSMUSG00000002280.11	3128.96	3361.31	3117.17	2819.94	3174.39	2995.71	3172.13	2917.22	2072.18	2518.63	2578.88	2308.75	2355.96	3133.08	2850.18	2565.44	2807.77	-0.10692	0.0515207	0	1	1	2807.77	0.117941	0.0522412	0	1	1
ENSMUSG00000002289.16	2216.91	2333.47	2156.94	1931.91	1885.01	1844.91	1918	1659.04	2826	3109.93	2948	2830	1549	1849	1905.84	1440	2169.49	-0.361939	0.051521	0	1	1	2169.49	-0.983729	0.0511552	0	1	1
ENSMUSG00000002297.16	17393.8	19264	18389.7	16859.6	16451.1	16869	17392.3	16781.6	14303.7	16206	17263.8	15611.6	12668.8	17648.7	15598.5	14644	16465.9	-0.160367	0.0489926	0	1	1	16465.9	-0.180953	0.0490723	0	1	1
ENSMUSG00000002307.16	9299	10550	10405	9465	11384	11639	12083	11167	9030	10068	10029	9444	8602	11381	10486	9195	10264.2	0.0616995	0.054673	0	1	1	10264.2	-0.0942461	0.0547614	0	1	1
ENSMUSG00000002308.16	3138	3515	3303	3044	4068	4102	3857	3535	3273	3591	3692	3141	3526	4681	3982	3550	3608.46	0.168126	0.0514378	0	1	1	3608.46	0.0775953	0.0513546	0	1	1
ENSMUSG00000002319.16	11271.4	12348	11507.5	10347.8	9945	9933.29	9949	9125.52	17965.7	20086.6	20312	19293.3	16235.6	20628.1	19336.8	16922	14605.3	-0.384275	0.0338964	0	1	1	14605.3	-0.144874	0.0332438	0	1	1
ENSMUSG00000002320.15	1518.45	1714.06	1797.69	1507.77	1954.33	2085.96	2150.7	1889.27	3612.78	4399.42	4328.57	3797.79	4014.32	5339.07	4417.65	4504.41	3006.44	0.146157	0.0613722	0	1	1	3006.44	0.106972	0.0585982	0	1	1
ENSMUSG00000002324.8	398	345.017	321	286	368	338	304	295	2127	2399.15	1896	1852	1285	1663	1532	1597	1045.5	-0.241418	0.12124	0	1	1	1045.5	-0.519897	0.110268	0	1	1
ENSMUSG00000002325.15	674.718	776.441	647.19	628.954	832.475	842.672	748.732	692.617	1086.4	1330.17	1319.89	1218.72	1527.71	2140.73	1680.91	1664.18	1095.77	0.104751	0.0843025	0	1	1	1095.77	0.38091	0.0799623	0	1	1
ENSMUSG00000002326.6	1109.18	1178.65	1110.5	1126.33	583.484	502.213	507.868	489.932	1867.78	2114.29	2229.17	1930.19	1130.02	1399.98	1347.12	1276.11	1246.46	-1.08777	0.0757405	-1.15887	0.24651	1	1246.46	-0.715767	0.0702702	0	1	1
ENSMUSG00000002329.7	1080.68	1252.89	1333	1068.93	1253.91	1253.96	1253.98	1194	2445	2634.88	2586.89	2385.97	2412	3244.89	2827.99	2599.68	1908.06	-0.0369054	0.0487671	0	1	1	1908.06	0.0190817	0.0437424	0	1	1
ENSMUSG00000002332.16	709	723	903	816	1120	1068	957	935	1907	2133	2112	1863	1679	2553	2060	2125	1469.1	0.387677	0.100752	0	1	1	1469.1	0.0503681	0.0974319	0	1	1
ENSMUSG00000002341.8	581.738	612.719	472.382	442.366	404.36	422.505	490.694	454.261	1878.88	2086.67	1825.12	1734.51	839.59	895.748	902.723	742.535	928.808	-0.338363	0.0970805	0	1	1	928.808	-1.27264	0.0902894	-3.01963	0.00253083	0.0686935
ENSMUSG00000002342.17	1681	1913	1648	1436	2137	2138	2217	1985	2277	2535	2299	2035	2940	4372	3709	3583.01	2411.96	0.207184	0.0739711	0	1	1	2411.96	0.642578	0.072712	0	1	1
ENSMUSG00000002343.11	4173.16	4457.05	4834.92	4223.3	2450.62	2336.45	2586.92	2344.83	2414.18	2706.77	2991.64	2848.83	1518.53	1575.68	1708.53	1324.78	2829.8	-1.02232	0.0856424	-0.260628	0.794379	1	2829.8	-1.01397	0.0867975	-0.160941	0.87214	1
ENSMUSG00000002345.18	1191	1436	1374	1297	1546	1513	1478	1389	1439.93	1677.97	1772	1617.9	1752.97	2474.81	2153.94	1957.96	1616.24	0.0667791	0.0639376	0	1	1	1616.24	0.21071	0.0625783	0	1	1
ENSMUSG00000002346.16	486.745	492.727	498.069	385.997	787.649	863.346	714.405	766.407	691.058	768.856	629.07	616.458	961.124	1183.35	1084.22	1105.11	740.982	0.582689	0.0822771	0	1	1	740.982	0.607944	0.0789767	0	1	1
ENSMUSG00000002365.10	1414	1728	1414	1241	1792	1835	1782	1656	1278	1577	1792	1542	1239	1577	1295	1195	1519.85	0.176122	0.0755144	0	1	1	1519.85	-0.360013	0.0760215	0	1	1
ENSMUSG00000002372.9	17132.8	18090.5	15727.4	14198.7	12329.9	12243.9	13215.5	12000.8	12045.4	12989.3	13371.1	12832.6	10742.7	14290.1	13367.1	11515.4	13536.1	-0.48699	0.0456582	0	1	1	13536.1	-0.185867	0.0457555	0	1	1
ENSMUSG00000002379.7	7314	7862	7385.99	6871	6612	6246.9	6068	5520.98	6404.99	7153.99	7202.99	6281.99	4315.97	5607.95	5183.97	4207	6302.83	-0.380023	0.0520367	0	1	1	6302.83	-0.639089	0.052324	0	1	1
ENSMUSG00000002384.2	227.763	223.637	269.288	244.092	238.099	244.896	252.418	217.211	158.949	181.623	195.754	151.513	211.144	313.963	296.087	301.657	232.342	-0.027986	0.111112	0	1	1	232.342	0.662716	0.113566	0	1	1
ENSMUSG00000002393.14	2801.37	3181.64	3391.52	3050.97	3595.4	3694.64	4230.97	3764.21	3681.05	4352.4	4105.85	3801.02	2851.91	3944.66	3441.47	3422.79	3578.47	0.0989856	0.0630751	0	1	1	3578.47	-0.407957	0.0629259	0	1	1
ENSMUSG00000002395.14	4494	5149	5795	5372	5437.99	5051	5700.01	4947	4463	4980	4922	4606	4153	5744	5307	4695	5046.21	-0.0377966	0.0771922	0	1	1	5046.21	0.0263431	0.0773041	0	1	1
ENSMUSG00000002396.8	1467.63	1547.36	1464.48	1253.03	1089.61	1042.36	1223.04	1108.79	1064.95	1216.6	1256.15	1091.98	739.089	1088.34	914.527	881.208	1186.08	-0.643142	0.0819963	0	1	1	1186.08	-0.754639	0.0832211	0	1	1
ENSMUSG00000002409.18	502	491	550	444	1862	1826.01	1905	1789.99	515	601	588	560	1592	2332	1868	1887	1184.89	1.83257	0.0609795	13.6532	1.93088e-42	7.08232e-39	1184.89	1.65966	0.0598521	11.0214	3.01204e-28	1.59013e-25
ENSMUSG00000002413.15	8714.99	8676	7549.71	6549.87	7964.89	8635.89	8099.86	7926.01	4331.81	5214.63	4817.63	4493.83	5324	7083.57	5613.84	5040	6592.45	-0.0510609	0.0587564	0	1	1	6592.45	0.193734	0.059363	0	1	1
ENSMUSG00000002416.13	2708.07	3144.5	2851.09	2510.78	2154.57	2108.95	2158.73	1959.05	2640.06	2905.4	2904.85	2524.43	1778.53	2257.49	2013.34	1816.47	2426.36	-0.588176	0.0426072	0	1	1	2426.36	-0.686668	0.0428622	0	1	1
ENSMUSG00000002428.12	5167.52	5761.82	6295.21	5537.99	5259.41	5408.17	5734.18	5441.74	4449.87	5533.8	5544.53	5069.2	5734.11	7494.04	6442.54	6042.21	5672.6	-0.13435	0.0635587	0	1	1	5672.6	0.286448	0.0635294	0	1	1
ENSMUSG00000002455.14	13337	14543	14323	12577	15060	15427	15482	14460	16227	18532	18190	17061	17059.9	22816	19629	17983	16330.6	0.0445996	0.0275487	0	1	1	16330.6	0.0177917	0.0272636	0	1	1
ENSMUSG00000002458.13	2363	2629	2765	2476	2500	2359	2514	2373	2573	3017	3147	2835	2617	3489	3006	2786	2714.65	-0.229416	0.0725069	0	1	1	2714.65	-0.144768	0.0720975	0	1	1
ENSMUSG00000002459.17	36.3555	45.8662	44.3538	42.1928	216.646	264.506	185.013	151.902	435.843	556.78	583.563	465.5	387.266	518.414	455.431	450.494	290.638	2.05664	0.172572	6.12286	9.19107e-10	1.59088e-07	290.638	-0.252236	0.130501	0	1	1
ENSMUSG00000002475.16	82	76.0031	68.128	61.0484	92	85.0023	66.0652	76.9999	177	184.021	152.022	153.002	126.009	201.006	166.08	149.057	115.43	-0.176023	0.1711	0	1	1	115.43	-0.0922716	0.147768	0	1	1
ENSMUSG00000002477.5	13139.9	15099	12751	11816	7622.98	7479.98	7716.93	6968.99	10472	11282	11860	10708	5981.99	7474.98	7329	6072	9706.24	-0.909743	0.0495589	0	1	1	9706.24	-0.876896	0.0497164	0	1	1
ENSMUSG00000002486.15	1946.6	2402.99	1854.22	1579.06	2380.26	2396.34	2472.28	2177.4	2145.9	2367.39	2244.61	2077.56	2469.34	3082.36	2776.42	2443.24	2282.99	0.101073	0.0766006	0	1	1	2282.99	0.1099	0.0762139	0	1	1
ENSMUSG00000002489.16	4181	4295	4719	4323	6828	7350	7433.01	6923	10380	12729	12815	11627	11906	15860	13644	12734	9062.01	0.56984	0.0558888	0	1	1	9062.01	0.0193147	0.0549042	0	1	1
ENSMUSG00000002496.10	13707.7	14285.6	13991.8	12246.4	18666	19845.4	19483	17898.1	13708.1	16786.5	15530.6	13864.1	18648.7	24763.7	21694.6	20296.1	17100.8	0.379913	0.0401979	0	1	1	17100.8	0.490314	0.0401183	0	1	1
ENSMUSG00000002500.15	65	113	76	66	60	70	58	64	119	98	108	122	67	90	71.9999	54	83.6744	-0.39131	0.236692	0	1	1	83.6744	-0.958905	0.230821	0	1	1
ENSMUSG00000002504.15	1519	1659	1980	1745	2511	2396	2440	2156	1247	1358	1469	1223	1383	1899	1592	1451	1761.48	0.33674	0.082242	0	1	1	1761.48	0.158627	0.083489	0	1	1
ENSMUSG00000002524.17	18676	20102	18316	16759	18576	18323	19688	17524	20700	23338	21892	20797	17925.1	24263	22018	19590	19863.3	-0.0949234	0.032235	0	1	1	19863.3	-0.153588	0.0321224	0	1	1
ENSMUSG00000002546.16	5218.99	5972	5402	4545	5388	5602	5770	5299	5680.99	6726	6245	5916.99	5386.17	7071.19	6045.98	5505.2	5718.52	-0.0867182	0.0528609	0	1	1	5718.52	-0.0798258	0.0526642	0	1	1
ENSMUSG00000002550.16	2892.76	3156	2447	2280.7	2949.74	3112.92	2663.05	2647.06	2849.27	2828.43	2651.08	2417.52	2527.15	3552.29	2838.25	2717.05	2775.23	0.0271764	0.0818213	0	1	1	2775.23	0.133522	0.081806	0	1	1
ENSMUSG00000002565.16	147.534	134.659	164.848	97.0001	158.267	147.474	138.642	123.299	95.077	96	96.0519	83.7255	113.758	147.2	113.67	128	123.373	-0.0173213	0.138098	0	1	1	123.373	0.328257	0.146051	0	1	1
ENSMUSG00000002578.17	227.087	305.49	256.596	203.91	353.084	403.044	407.733	425.424	340.093	424.767	392.9	393.046	545.973	715.16	646.3	555.351	402.897	0.419834	0.145942	0	1	1	402.897	0.501426	0.141759	0	1	1
ENSMUSG00000002580.7	1648	1826	2015	2008	1139	1154	1206	1032	1543	1568	1588	1546	617	802	731	562	1334.91	-0.845141	0.0934393	0	1	1	1334.91	-1.35103	0.0954116	-3.67916	0.000234004	0.00851976
ENSMUSG00000002588.13	0	0	4	2	2	0	1	0	1	1	0	0	0	0	0	0	0.682127	-0.837042	2.18949	0	1	NA	0.682127	-1.56314	2.37312	-0.237301	0.812423	NA
ENSMUSG00000002602.16	192	176	229	227	243	295	347	346	166	127.001	119	130	85	99	125	104	196.68	0.421962	0.232553	0	1	1	196.68	-0.186765	0.242146	0	1	1
ENSMUSG00000002603.15	892.959	995.211	1482.38	1285.76	1283.84	1313.17	1484.87	1454.79	1817.53	1917.29	2022.85	1780.44	1383.95	2374.74	1917.16	1853.51	1569.05	0.0808788	0.14291	0	1	1	1569.05	-0.192481	0.14199	0	1	1
ENSMUSG00000002608.8	4150	4204	3948	3535	4506	4600	4298	4090	3388	4116	3861	3768	3963	5401	4918	4596	4192.27	0.0476714	0.0580354	0	1	1	4192.27	0.231308	0.0580216	0	1	1
ENSMUSG00000002617.14	528.922	562.591	563.396	503.93	776.831	835.367	725.346	745.936	375.36	458.947	517.859	493.238	569.777	785.365	551.35	562.746	594.073	0.30661	0.0894995	0	1	1	594.073	0.428373	0.0914176	0	1	1
ENSMUSG00000002625.10	5945	5896	4177	3780	7116	6962	6483	5978	5570	6076	5560	4943	9863.99	13833	12054	11723	7139.28	0.419269	0.0856119	0	1	1	7139.28	1.00247	0.0853387	0.0289666	0.976891	1
ENSMUSG00000002633.4	12	12	14	6	12	12	14	8	7	2	5	3	6	11	11	8	8.85545	-0.025115	0.439832	0	1	1	8.85545	0.938873	0.529797	0	1	1
ENSMUSG00000002635.11	3140	3422	3424	3326	4029	3869	4206	3717	3223	3278	3445	3098	3367	4176	3842	3333	3549.63	0.0558717	0.0593321	0	1	1	3549.63	0.000177202	0.0594514	0	1	1
ENSMUSG00000002658.9	14554	17311	17469	15434	10025	10268	10544	9638	11538	12876	13379	12229	7612	9746	9123	7849	11961.9	-0.778719	0.0570779	0	1	1	11961.9	-0.673981	0.0572464	0	1	1
ENSMUSG00000002660.8	9993	11267	11121	10204	7805	7584	7668	6966	8108	8734	9234	8603	5693	7637	7245	6361	8447.28	-0.611501	0.0521919	0	1	1	8447.28	-0.500609	0.0523819	0	1	1
ENSMUSG00000002661.14	1703	1812	1718	1579	1784	1568	1751	1520	1257	1379	1408	1214	1576	2052	1710	1691	1603.18	-0.157753	0.0515036	0	1	1	1603.18	0.280496	0.052221	0	1	1
ENSMUSG00000002664.2	29	33	18	16	27	27	14	21	13	16	3	12	22	37	25	21	20.5733	-0.203059	0.360809	0	1	1	20.5733	1.09955	0.390293	0.255075	0.798665	1
ENSMUSG00000002668.8	75.6603	93.3078	106.696	74.7118	195.605	188.295	187.286	193.258	125.085	117.543	121.496	123.24	189.269	246.505	233.403	231.468	153.964	1.0155	0.172762	0.0897025	0.928524	1	153.964	0.698521	0.166531	0	1	1
ENSMUSG00000002679.14	4272	4346	3899	3574	2789	2635	2767	2524	3163	3500	3626	3491	2187	2967	2633	2320	3179.32	-0.63662	0.0411412	0	1	1	3179.32	-0.560897	0.041563	0	1	1
ENSMUSG00000002688.8	151	156	128	102	168	197	182	161	62	73	84	67	55	80	53	56	110.887	0.308791	0.130282	0	1	1	110.887	-0.359716	0.16126	0	1	1
ENSMUSG00000002699.13	2.00818	5.02057	6.00094	8.00119	2.01955	2.01516	8.02865	3.48102	3.00023	2.00987	2.00085	1.00012	2.00911	6.00208	5.01558	7.00281	4.15635	-0.601103	0.74468	0	1	1	4.15635	1.5098	0.824892	0.618014	0.536566	1
ENSMUSG00000002718.14	40889.3	43335.7	39859	35806.4	32030.9	33701.2	33424.1	31599.2	40851	47413.6	46638.2	43336.7	29516.7	37247.8	33916.9	30953.2	37593.1	-0.351762	0.0251529	0	1	1	37593.1	-0.534371	0.0251261	0	1	1
ENSMUSG00000002728.14	6199.08	6510	5265	4605.14	4577	4418	4458	4321	5021	5624.95	5321.04	5068	3286	4270.36	3775	3571	4782.38	-0.42708	0.0467622	0	1	1	4782.38	-0.617347	0.0470794	0	1	1
ENSMUSG00000002731.6	493	561	449	494	739	690	727	657	721	852	711	662	742	1015	910	804	695.839	0.411947	0.0818235	0	1	1	695.839	0.12297	0.0788968	0	1	1
ENSMUSG00000002732.14	80	84	60	55	74.9999	65	59	66	66.0001	101	79	69	45	85	50	64	68.7156	-0.160823	0.185298	0	1	1	68.7156	-0.535026	0.185071	0	1	1
ENSMUSG00000002733.8	3292.82	3618.05	3085.56	2761.19	2839.56	2927.9	2797.96	2560.68	2689.94	3022.76	2976.42	2730.13	1731.11	2606.48	1945.86	2001.34	2735.6	-0.315403	0.0460247	0	1	1	2735.6	-0.622943	0.0469482	0	1	1
ENSMUSG00000002741.9	10769	11506	9332	8292	6284	6362	6307	5906	9324	10176	10017	8975	4508	5935	5202	4741.99	7758.81	-0.729644	0.0457583	0	1	1	7758.81	-1.0061	0.0459864	-0.132746	0.894394	1
ENSMUSG00000002748.7	18918.8	19313.2	18624.9	16199.4	22551.5	23753.2	22818.5	21244.4	22214.4	26860.1	25704.7	22906.7	24063.7	32825	27372.3	25232	22999.2	0.225702	0.0281827	0	1	1	22999.2	0.0521482	0.0279864	0	1	1
ENSMUSG00000002763.16	2485	2771	3424	3046	5604	5365	4729	4561	4939	5204	4842	4711	6748	8694	7731.99	6918	5026.03	0.647661	0.0937498	0	1	1	5026.03	0.463629	0.0931919	0	1	1
ENSMUSG00000002767.13	7096.93	7706.56	8588.66	7883.74	9957.95	9355.03	10177	9064.25	9158.49	10222.7	10359.5	9279.75	8500.36	11029.4	10114.6	8505.79	9156.83	0.182	0.0632723	0	1	1	9156.83	-0.149409	0.0631777	0	1	1
ENSMUSG00000002768.8	4144.85	4854.83	4791.1	4324.41	4143.25	4158.93	4434.9	3955.98	3462.71	4016.31	3829.41	3518.55	2984.84	4097.38	3777.2	3258.56	3994.2	-0.240263	0.0527713	0	1	1	3994.2	-0.197363	0.0532433	0	1	1
ENSMUSG00000002769.9	53	62	46	27.9999	37	39	66	41	98.0001	100	57	65	44	45.9999	39	46	54.385	-0.116776	0.267683	0	1	1	54.385	-1.00602	0.259955	-0.0231472	0.981533	1
ENSMUSG00000002771.12	237.01	247	236.011	182.017	296.016	293	264	270.047	338	394	345.011	296	510	754.042	680.024	681	368.369	0.247389	0.0950037	0	1	1	368.369	0.800689	0.0847019	0	1	1
ENSMUSG00000002778.14	3525	3697	3811	3429	3833	4050	3956	3853	5043	5742	5320	4854	4772	7014	5755	5536	4595.76	0.0201307	0.0401752	0	1	1	4595.76	0.0366774	0.0390912	0	1	1
ENSMUSG00000002781.19	1759.88	1994.86	1981.94	1729.33	2013.12	1827.73	1974.67	1952.84	1940.49	2242.27	2037.25	1890.95	1715.67	2321.48	2088.34	1870.38	1959.2	-0.148037	0.0857918	0	1	1	1959.2	-0.0619286	0.0856432	0	1	1
ENSMUSG00000002791.17	25.5021	20.2646	12.012	7.01962	18.7156	7	8	13.5748	27.0432	42.7114	32.414	37.5428	20.4464	34.4738	40.4947	41.7278	23.9888	-0.654779	0.457392	0	1	1	23.9888	-0.463158	0.402075	0	1	1
ENSMUSG00000002797.9	1653	1940	1749	1463	901	851	867	835	1829	1979	1721	1761	814	892	943.999	761	1344.41	-1.1889	0.0916359	-2.06141	0.0392635	1	1344.41	-1.28227	0.0915643	-3.08272	0.0020512	0.0572953
ENSMUSG00000002799.6	2885	3006	2028	1856	2174	2291	2417	2391.99	2338	2448	1924	1919	1970	2740	2143	2096.23	2297.37	-0.304396	0.140943	0	1	1	2297.37	-0.0653347	0.141076	0	1	1
ENSMUSG00000002803.14	1285	1301	1236	1101	1469	1387	1481	1331	1273	1404	1369	1181	1276	1730	1534	1418	1355.05	0.0339146	0.0584538	0	1	1	1355.05	0.0652627	0.0581066	0	1	1
ENSMUSG00000002804.4	1885	2122	2200.99	1974	2168	2333	1821	1834	2666	2961	2637	2281	1502	2132	1656	1604	2110.76	-0.0878035	0.0768844	0	1	1	2110.76	-0.693904	0.0768451	0	1	1
ENSMUSG00000002808.7	422.572	452.155	396.52	393.799	826.425	890.628	676.654	633.257	878.442	999.266	1077.08	936.721	1876.66	2862.52	2180.74	2236.03	1072.59	0.822781	0.106183	0	1	1	1072.59	1.18656	0.100498	1.85638	0.0633993	0.975803
ENSMUSG00000002812.4	4876	5399	5643	5118	7501	7520	7601	7219	7625	8836	8055	7231	9264	13524	10996	10749	7863.14	0.387868	0.0660126	0	1	1	7863.14	0.381968	0.0655901	0	1	1
ENSMUSG00000002814.15	3742	3809	4213	3842	4796	4756	4561	4187	4092	4599	4733	4540	4013	5404	4923	4573	4411.68	0.133311	0.0656821	0	1	1	4411.68	-0.0214518	0.0655299	0	1	1
ENSMUSG00000002820.6	2964.11	3335.79	3094.76	2919.65	3475.19	3402.28	3633.11	3227.93	2942.47	3249.72	2857.88	2602.54	3576.75	4839.94	4007.07	3837.2	3343.84	-0.038814	0.0648201	0	1	1	3343.84	0.182882	0.0647202	0	1	1
ENSMUSG00000002825.8	3530	3827	3783	3567	4062	3919	4195	4000	3082	3339	3388	3239	3848	5085	4576	4327	3848.4	-0.00628039	0.0496779	0	1	1	3848.4	0.369406	0.0497512	0	1	1
ENSMUSG00000002831.13	33	23	44	51	79	63	84	78	28	56	39	31	45	51	54	61	51.0844	0.897452	0.268657	0	1	1	51.0844	0.348663	0.274274	0	1	1
ENSMUSG00000002833.11	15396.8	17453.9	16665	14531.7	16417.4	16584.6	16922.1	15241.2	15421.1	17031.7	16143.7	15317	14607.4	19317.5	17383.1	16130.4	16257.7	-0.123727	0.0345844	0	1	1	16257.7	-0.0523881	0.0345736	0	1	1
ENSMUSG00000002835.9	16516.5	18621.2	17256.3	15219.2	14568.9	14466.8	15280.3	14125.5	19928.7	22177.4	21749.2	20101.9	15102.6	19246.8	17731.4	15600.5	17662.3	-0.545709	0.0532535	0	1	1	17662.3	-0.676664	0.0531533	0	1	1
ENSMUSG00000002844.9	20061.5	21473.3	20978.5	18457.4	19593.4	18458.3	18088.2	16334.4	13845.5	16219.6	17133.6	14881.2	11339.8	15455.3	13672.8	12711.8	17285.9	-0.457901	0.0591694	0	1	1	17285.9	-0.36766	0.0593269	0	1	1
ENSMUSG00000002845.14	8147	8664	7191	6408	9544	9636	8527	7998	7697	9112	7896	7234	8909	11662	9882	9356	8556.79	0.161914	0.0588034	0	1	1	8556.79	0.164751	0.0587253	0	1	1
ENSMUSG00000002846.9	1932.06	2062.22	1920.13	1604.48	2096.81	2225.98	1989.6	1879.37	2432.71	2469.85	2397.51	2169.29	2549.74	3471.78	2762.85	2624.13	2266.17	0.0159838	0.0536433	0	1	1	2266.17	0.117091	0.0524321	0	1	1
ENSMUSG00000002847.7	361	360	509	464	1010	944	982	986	722	868	890	867	420	636	467	493	685.361	1.1034	0.122487	0.844186	0.398566	1	685.361	-0.86752	0.122148	0	1	1
ENSMUSG00000002870.8	59948.6	66475.6	62653	57048.5	62139.6	62638.4	64777	58395.1	30326.8	34239.9	34374.1	31589.2	28461.2	36141.2	33930.7	28853	47177.9	-0.0862247	0.0380827	0	1	1	47177.9	-0.159766	0.038287	0	1	1
ENSMUSG00000002871.14	833	982.001	656	531	1420	1332	1312	1325	535.999	601	530	413	813	1192	1020	991	896.312	0.646774	0.178963	0	1	1	896.312	0.795661	0.180233	0	1	1
ENSMUSG00000002881.14	1841.97	1959	1303	1087.17	1183	1269	1003	1041.23	1779.01	1722	1450	1372	1438	1767	1450	1256	1429.86	-0.545464	0.125997	0	1	1	1429.86	-0.227619	0.125508	0	1	1
ENSMUSG00000002885.14	3218.52	3342.21	3859.19	3368.47	7285.12	7424.93	7481.16	6907.64	4580.25	5233.19	4007.15	3865.65	5123.29	6731.82	5505.84	5228.24	5133.99	0.924649	0.0819672	0	1	1	5133.99	0.208772	0.0818973	0	1	1
ENSMUSG00000002897.5	577.265	556.715	568.576	494.328	1007.89	953.221	1040.52	996.989	667.583	760.511	727.307	684.921	1021.81	1400.88	1232.34	1276.14	858.784	0.833296	0.0756154	0	1	1	858.784	0.534835	0.073512	0	1	1
ENSMUSG00000002900.16	18632	19126	14863	13392	14394	16040	16766	15597	14450	15346	14316	13935.1	11845	14176	12473	10593	14765	-0.162982	0.0748658	0	1	1	14765	-0.353997	0.0749573	0	1	1
ENSMUSG00000002908.17	68.4323	66.0201	78.5336	71.2618	102.626	113.588	110.597	103.092	233.736	306.305	223.129	204.673	332.66	515.596	389.086	381.183	199.928	0.497166	0.168114	0	1	1	199.928	0.504642	0.139844	0	1	1
ENSMUSG00000002910.11	257	249	295.5	293	456.5	417	464	395	630	651.5	550.5	584	384.5	484.5	434.499	376.5	432.171	0.537923	0.1056	0	1	1	432.171	-0.713429	0.100807	0	1	1
ENSMUSG00000002930.6	1	0	2.00001	2	1	3.00037	0	2	0	1	0	1	1	0	0	0	0.90253	0.13073	1.47868	0	1	NA	0.90253	-0.835482	1.86854	0	1	NA
ENSMUSG00000002944.15	1	1	2	2	2	2	0	1	0	2	0	0	1	1	0	0	1.10091	-0.694871	1.46977	0	1	NA	1.10091	-0.0799712	1.77816	0	1	NA
ENSMUSG00000002948.19	5583	6053	5924.17	5352.82	7929.08	8085.22	8417.31	8066.55	6323	7425.21	7470	6849.08	8819.68	11795.2	10451.6	9879.45	7735.65	0.479444	0.0493591	0	1	1	7735.65	0.504529	0.04906	0	1	1
ENSMUSG00000002949.15	4879	5264	5307	4741	4401	4233	4686	4299	5175	5607	5700	5219	4167	5212	5062	4367	4897.59	-0.276636	0.0507039	0	1	1	4897.59	-0.255557	0.0505688	0	1	1
ENSMUSG00000002957.11	21054	22256	20612	18623.5	17679.3	18059	17938	16419.4	23589.5	26759	25816	22719.5	17692.4	24210.3	19403.9	18346.9	20705	-0.332519	0.0294514	0	1	1	20705	-0.435295	0.0293241	0	1	1
ENSMUSG00000002963.17	1612	1768	1862	1770	2148	2062	2077	2022	2181	2409	2149	1917	2045	2887	2535	2349	2095.81	0.065851	0.061506	0	1	1	2095.81	0.0117135	0.0607537	0	1	1
ENSMUSG00000002968.9	11477.1	12571.8	14629.4	13077.7	20726.2	20371.3	21371.3	19629.8	17497.1	19987.8	19193.3	17818.5	19021.4	24793.2	23100.9	20846.9	18342.7	0.56183	0.0716273	0	1	1	18342.7	0.0893581	0.0715325	0	1	1
ENSMUSG00000002980.14	15882	17740	21122	19423	33663	32957	33107	31537	14580	18037	20685	17058	23285	31753	30118	27886	23969.8	0.631816	0.0952904	0	1	1	23969.8	0.521142	0.0953135	0	1	1
ENSMUSG00000002981.10	10326	11245	11962	10780	12561	13128	13491	12325	6826	7957	7782	7152	10619	15512	12541	12169	10949.3	0.0892538	0.0530428	0	1	1	10949.3	0.593264	0.0532688	0	1	1
ENSMUSG00000002983.17	1203.04	1308.11	1367.31	1282	1161.05	1091.74	1279.8	1197.76	778.775	840.006	839.676	717.018	870.752	1458.46	1055.06	1164.36	1101.07	-0.189016	0.101263	0	1	1	1101.07	0.392454	0.102624	0	1	1
ENSMUSG00000002984.17	26438.1	29757.8	32994.3	29573.9	22808.7	21913.9	23587	21325	27105.8	29230.8	30100.4	28537.4	15429.5	19748.5	18150.2	16210.2	24759.5	-0.495862	0.0689649	0	1	1	24759.5	-0.844396	0.06902	0	1	1
ENSMUSG00000002985.16	17566	20174	21093	19182	32700	31651	32798	29566	10319	10530	11358	10732	19729	25656	24687	21214	20975.5	0.550385	0.0640495	0	1	1	20975.5	0.916065	0.0642707	0	1	1
ENSMUSG00000002992.17	17	12	16	20	4	5	10	9	7	4	2	2	0	2	3	0	6.98138	-1.25354	0.528602	-0.479642	0.631482	1	6.98138	-1.7419	0.856538	-0.866163	0.386401	1
ENSMUSG00000002996.17	6790.13	6932.79	5189.54	4785.85	15332.4	15607.3	15703.4	14850.4	6296.19	7014.39	6579.49	6201.65	14898.2	20214.5	17060.2	16017.2	10999.7	1.23879	0.076426	3.12449	0.00178116	0.0866653	10999.7	1.3099	0.0763508	4.05886	4.93132e-05	0.0021252
ENSMUSG00000002997.15	299	285	357	286	810	806	743	717	189	216	200	206	424	544	478	389	429.501	1.1884	0.122647	1.53612	0.124509	1	429.501	1.01986	0.127971	0.155182	0.876678	1
ENSMUSG00000003031.14	1821	1895	1606	1384	4278	4334	3943	3809	4171	5275.01	4585	3988	7420	11506	8684	8886	4701.75	1.19995	0.0576377	3.4691	0.000522213	0.0295645	4701.75	0.834444	0.0552766	0	1	1
ENSMUSG00000003032.8	14454	16066	14221.4	13008.6	33418.4	35160.7	33892.9	32327.4	38110.4	44419.8	39895.7	35906.2	60258.9	86823.3	68842	66448.4	38647.2	1.11782	0.0375858	3.13456	0.00172112	0.0843132	38647.2	0.707311	0.0371713	0	1	1
ENSMUSG00000003033.15	4022	4230	4250	3979	4741	4513	4277	3854	3488	4049	4046	3713	4286	5646	5265	4664	4298.18	-0.0140572	0.0535727	0	1	1	4298.18	0.303925	0.0535346	0	1	1
ENSMUSG00000003037.16	5754.05	6613.02	6410.9	5980.12	6114.57	5942.93	6112.06	5722.53	6060.92	6958.05	6905.93	6149.78	5389.65	7587.27	6651.61	6042.88	6264.99	-0.163547	0.051339	0	1	1	6264.99	-0.0960408	0.0512463	0	1	1
ENSMUSG00000003038.15	6646.39	7305.51	6684.68	5929.7	5596.64	6061.54	6057.71	5358.88	5738.02	6667.84	6087.04	5586.94	4320.99	5531.68	4868.91	4302.29	5816.29	-0.302519	0.0386235	0	1	1	5816.29	-0.472491	0.038985	0	1	1
ENSMUSG00000003039.9	7515.31	8297.15	8233.2	7381.39	8092.16	7734.95	8513.3	7883.9	6610.89	7281.44	7601.19	6967.71	6392.17	8173.98	7744.47	6788.52	7576.82	-0.0692291	0.0533594	0	1	1	7576.82	-0.110533	0.0534948	0	1	1
ENSMUSG00000003051.13	1922	2055	2102	1991	1150	1237	1435	1322	2979	3010	2111	2148.01	1362	1909	1602	1403	1870.74	-0.729705	0.116455	0	1	1	1870.74	-0.839333	0.115925	0	1	1
ENSMUSG00000003053.17	14.0586	16	18.0212	11.0914	18	1.01129	11.0353	12	1	5	1.00578	4.02043	2.20854	1	2	3.34386	7.61664	-0.570384	0.610813	0	1	1	7.61664	-0.562308	0.858046	0	1	1
ENSMUSG00000003062.13	3824	4146	4058	3771	3762	3969	3673	3539	4265	4900	4770	4264	3986.45	5279	4536	4356	4185.59	-0.152409	0.0394438	0	1	1	4185.59	-0.14757	0.0389207	0	1	1
ENSMUSG00000003068.16	11286.1	12593.1	12227.9	10459	13097.8	13217.5	14138.9	12994	11418	12463	11811.3	11250.8	12240.4	15783.7	14053.3	12842.4	12577.5	0.124281	0.0319178	0	1	1	12577.5	0.156028	0.0318991	0	1	1
ENSMUSG00000003070.6	601.931	669.625	691.899	584.89	804.625	768.787	802.41	682.537	831.025	988.93	924.968	872.936	1150.97	1599.71	1336.95	1158.9	893.367	0.165442	0.061846	0	1	1	893.367	0.403161	0.0574736	0	1	1
ENSMUSG00000003072.15	14023	15317.3	15252	13918	11214	10593	10986	9798	16563	17488	16773	15748.5	9679	12123	11520	9709	13260.9	-0.56118	0.0510024	0	1	1	13260.9	-0.761305	0.050959	0	1	1
ENSMUSG00000003099.11	14835	16910	17183	15782	12558	12484	13212	12039	11516	12745	12585	11888	9242	12141	11112	9801	12918.1	-0.458863	0.0436401	0	1	1	12918.1	-0.246735	0.0438557	0	1	1
ENSMUSG00000003119.14	17457.4	18255.7	15088.9	13298.4	14133.6	15631.2	14426	13886.6	13267.4	17370.8	16358.1	14547.1	12929.1	16325.1	13637.4	12533.1	14917.1	-0.202059	0.0572479	0	1	1	14917.1	-0.221281	0.057277	0	1	1
ENSMUSG00000003123.15	1006.81	1017.83	1074.75	964.863	1624	1536.84	1608.54	1500	1401.89	1564.97	1346.53	1246.74	1390.93	1837.61	1670.95	1612.29	1399.79	0.658048	0.0778244	0	1	1	1399.79	0.0870179	0.0768601	0	1	1
ENSMUSG00000003131.7	4808.32	5255	4602	3908.72	3835	4213.71	3917.91	3824.47	6549.27	7600.26	7365.28	6703.21	4028.32	5134.69	4311.38	4174.17	5057.01	-0.428845	0.0457287	0	1	1	5057.01	-0.815083	0.0451569	0	1	1
ENSMUSG00000003134.10	900.104	868.123	767.465	705.762	1493.28	1596.05	1322.96	1334.97	2138.69	2690.97	2618.17	2030.67	4280.85	7572.9	5046.43	5886.24	2487.59	0.764311	0.0970495	0	1	1	2487.59	1.1156	0.0934067	1.2376	0.215864	1
ENSMUSG00000003135.15	8232	8922	8761.01	7787.01	7417	7529	7472	7161	13629	15902	16167	14457	12162	16776	14457	13720	11229	-0.280184	0.0362743	0	1	1	11229	-0.197751	0.0354265	0	1	1
ENSMUSG00000003153.10	40423.3	39825.6	35144.5	31546.3	45187.1	47919.9	42543.2	40631.7	66014	73469.4	54979	54483.3	100670	147495	113265	112348	63345	0.108481	0.0735869	0	1	1	63345	0.739067	0.0734968	0	1	1
ENSMUSG00000003154.15	344	392	455	360.777	463	519.762	451.778	464	816.815	943	831.852	679.914	613	909.952	704.931	748.989	610.403	0.0586629	0.137995	0	1	1	610.403	-0.280442	0.133971	0	1	1
ENSMUSG00000003161.15	2070.82	2249.97	2026.95	1795.06	1320.09	1382.64	1352.18	1297.85	1545.42	1675.04	1534.87	1416.92	1158	1493.74	1216.27	1141.38	1547.71	-0.702705	0.0448955	0	1	1	1547.71	-0.2999	0.046113	0	1	1
ENSMUSG00000003166.20	6415.39	6752.5	6261.12	5716.51	7623.04	7831.15	7552.69	7043.97	6708.58	7581.2	7514	6657.39	7207.35	9466.29	8250.31	7676.38	7235.16	0.170502	0.0310773	0	1	1	7235.16	0.175068	0.0308418	0	1	1
ENSMUSG00000003184.15	1952	2220	2042	1797	2432	2447	2389	2229	2049	2271	2260	2006	2389	3026	2866.41	2564	2294.75	0.143301	0.0468605	0	1	1	2294.75	0.191124	0.0463958	0	1	1
ENSMUSG00000003190.12	1044	1170	1034	884	1572	1652	1620	1452	1352	1559	1412	1248	1679	2226	2166.59	1872	1477.61	0.472014	0.0609279	0	1	1	1477.61	0.369412	0.0592828	0	1	1
ENSMUSG00000003198.10	691.347	770.912	694.444	642.413	790.459	849.282	716.154	750.566	656.058	843.745	876.331	799.902	734.931	913.885	841.613	796.29	771.035	0.0669964	0.0775552	0	1	1	771.035	-0.0867671	0.07676	0	1	1
ENSMUSG00000003199.16	3536	3828	4021.01	3552	7724	7309	7652	7057	4861	5308	4749	4367	6580	9313	8392	7722	5904.47	0.858801	0.0582846	0	1	1	5904.47	0.590674	0.0579784	0	1	1
ENSMUSG00000003200.10	9639	10355	10352	9443	8937	8584	9015	8249	8578	9530.01	9899	9068	7404	10037	8668	7561	9100.45	-0.295178	0.0461458	0	1	1	9100.45	-0.284543	0.0462165	0	1	1
ENSMUSG00000003206.7	50	50	54	38	56	37	36	53	42	56	56	54	57	54	61	48	50.1258	-0.171426	0.217907	0	1	1	50.1258	-0.0441003	0.211389	0	1	1
ENSMUSG00000003208.9	1479.99	1679.99	1682.95	1678	1527.95	1360.94	1493.87	1381	1319.99	1581.98	1608.99	1564.99	1143.98	1580.97	1506.91	1213.97	1492	-0.283286	0.0832589	0	1	1	1492	-0.299041	0.0835587	0	1	1
ENSMUSG00000003226.7	31721.3	30776.7	25058.5	21773.8	22776	25029.2	23395.9	22188.4	13658.3	17751.8	16275.5	14591.6	13779	18983.9	14101.4	13563.2	20354.4	-0.306529	0.0720446	0	1	1	20354.4	-0.155601	0.0722316	0	1	1
ENSMUSG00000003227.4	6	4	10	6	25	15	15	8	1	2	1	1	1	3	6	1	6.50491	1.16884	0.575442	0.293411	0.769208	1	6.50491	0.999835	0.909533	0	1	1
ENSMUSG00000003228.9	648	646	730	636	532	534.729	508	564	653	716	771	718	369	462	405	381	590.643	-0.410668	0.100408	0	1	1	590.643	-1.10538	0.101782	-1.03531	0.300526	1
ENSMUSG00000003233.12	2883.99	3252.68	2696.95	2342.88	3353.84	3659.13	3284.07	3276.26	3508.72	4495.79	4505.37	3889.15	4599.89	6310.09	5456.03	5378.5	3884.82	0.182896	0.057307	0	1	1	3884.82	0.292819	0.0562786	0	1	1
ENSMUSG00000003234.16	5291	5588	4858	4628.01	5347	5302	5057	4737	4212.99	4817	4688	4202	4778	6517	5698	5127	5047.61	-0.0361148	0.0574334	0	1	1	5047.61	0.332751	0.0574986	0	1	1
ENSMUSG00000003235.13	20279	22122	21994	19880	18075	18189	18867	17770	18866	20803	20400	19111	14758	19201	16763	15114	18953.4	-0.312028	0.0381413	0	1	1	18953.4	-0.399509	0.0382064	0	1	1
ENSMUSG00000003269.17	6942	7832.99	8856	7999	9481.01	9199.99	9446	8836.01	6100	7333	7456.01	6780	7296.99	10112	8756	7675	8108.53	0.139174	0.0739102	0	1	1	8108.53	0.213395	0.0740161	0	1	1
ENSMUSG00000003271.17	126	109	181	152	206	222	239	234	202.158	213	201.662	185	261.57	358	280.239	270.357	213.144	0.609741	0.156139	0	1	1	213.144	0.332873	0.151083	0	1	1
ENSMUSG00000003273.14	327	307	250	197	202	220	246	212	142	165	136	117	175	245	205	243	213.036	-0.476177	0.1599	0	1	1	213.036	0.643814	0.165468	0	1	1
ENSMUSG00000003279.17	252.466	256.883	305.023	280.284	310.414	289.634	267.239	273.111	283.164	318.962	369.431	378.103	344.265	463.918	343.015	330.961	314.706	-0.0443055	0.110976	0	1	1	314.706	-0.0491241	0.107486	0	1	1
ENSMUSG00000003282.9	468	426	349.015	321	837	931	787.014	733	842	1046	856	725	1686.02	2589	1728	1923.02	978.959	0.908968	0.116632	0	1	1	978.959	0.732097	0.111727	0	1	1
ENSMUSG00000003283.14	4629	4799.01	4942.99	4468	5829.99	5687.99	5621.99	4824.01	3768	3756	4069.01	3881	5343.01	5629	6562	4978	4911.85	0.107178	0.0861411	0	1	1	4911.85	0.433086	0.0862664	0	1	1
ENSMUSG00000003299.10	6840	7532	8090	7189	6612	6451	6951	6326	7997	8655	8564	7974	5904	7412	6998	6086	7262.07	-0.312584	0.0609301	0	1	1	7262.07	-0.500921	0.0608729	0	1	1
ENSMUSG00000003308.15	3074	3163	2872	2540	3405	3338	3159	2774	3604	4402	4462	3894	4378	5985.01	4759	4703	3737.15	0.0509286	0.0610071	0	1	1	3737.15	0.175828	0.0601016	0	1	1
ENSMUSG00000003309.14	1068	1221	1541.03	1568	1851.19	1921.06	3263	2979	1277	1432	1431.03	1588.05	2060	3605	2819	3085	2029.65	0.812661	0.2159	0	1	1	2029.65	0.971974	0.215798	0	1	1
ENSMUSG00000003316.14	16008.5	15556.3	13113.5	11631.7	18711.6	20126.1	18975.7	17403.6	16461.3	19696.9	17559.7	15999.7	21911.6	29215.1	22940.5	21848	18318.1	0.257322	0.0580722	0	1	1	18318.1	0.278765	0.0579592	0	1	1
ENSMUSG00000003341.9	137	149	97	89	122	115	158	132	175	174	138	136	170	230	214	169	148.531	0.19193	0.162402	0	1	1	148.531	0.125182	0.154977	0	1	1
ENSMUSG00000003344.14	5909	6391	5488	4876	6523	6432	6998	6632	5857	6227	5971	5471	5437	6606	6355.99	5004	6000.62	0.146633	0.0634137	0	1	1	6000.62	-0.129972	0.0634741	0	1	1
ENSMUSG00000003345.16	13157.8	14385.1	14860	13112.5	16076	16044.8	17130	15322.1	15181	16102.7	15895	14995.1	12184.7	15547.2	14333.3	12818	14816.5	0.123892	0.0468129	0	1	1	14816.5	-0.290555	0.046834	0	1	1
ENSMUSG00000003346.14	4704	5235	6376	5797	7067	6791.99	6985	6391	6321	7102	6466	6070	5303	6825	6346	5632	6204.68	0.171912	0.0857888	0	1	1	6204.68	-0.208981	0.0857722	0	1	1
ENSMUSG00000003348.10	2038	2263	2167	1881	2234	2149	2275	2115	1788	1923	1652	1496	1478	1963	1710	1470	1911.86	-0.0184317	0.0663229	0	1	1	1911.86	-0.195174	0.0673284	0	1	1
ENSMUSG00000003352.14	3609	4331	4586	4073	5163	5318	6034	5561	1075	1074	1103	1040	1301	1798	1602	1513	3074.38	0.300014	0.0775017	0	1	1	3074.38	0.296767	0.0813005	0	1	1
ENSMUSG00000003354.6	126	133	117	106	154	155	117	116	132	178	156	134	151	254	190	239	152.032	0.0839637	0.142496	0	1	1	152.032	0.488143	0.13472	0	1	1
ENSMUSG00000003355.7	1550.14	1733.09	1667.7	1539.14	1302.95	1309.99	1395.45	1218.64	1879.75	2003.68	1714.29	1854.19	1245.09	1467.56	1392.3	1196.75	1540.02	-0.420375	0.0687542	0	1	1	1540.02	-0.648189	0.0684197	0	1	1
ENSMUSG00000003360.15	19692.2	22811.3	22243.2	20098.6	18222.4	18479.1	19618.4	17972.8	16752.1	18369.8	18547.9	17574.3	15420	19934.9	18244.5	16941.3	18824.9	-0.299813	0.0473795	0	1	1	18824.9	-0.0901488	0.0474472	0	1	1
ENSMUSG00000003363.15	3454	3655	3870	3454	4925	4912	4587	4377	3334	3888	3534	3263	3812	5667	4655	4612	4089.59	0.209719	0.0491201	0	1	1	4089.59	0.287422	0.0491838	0	1	1
ENSMUSG00000003378.9	915.815	986.511	888.438	712.975	1421.2	1524.2	1448.97	1274.25	1317.06	1442.21	1327.47	1318.56	1782.06	2334.52	1994.76	1904.09	1388.02	0.466084	0.0795666	0	1	1	1388.02	0.522125	0.0775392	0	1	1
ENSMUSG00000003379.7	113	116	125	120	34	28	35	39	73	80	69	64	4	15	8	15	60.4143	-1.90291	0.199543	-4.52488	6.04289e-06	0.000562149	60.4143	-2.90563	0.277921	-6.85673	7.04547e-12	9.35718e-10
ENSMUSG00000003380.11	3085	3469	4310	3960	5337	4941	5180	4611	4137	4346	3769	3679	4374	5813	4907	4498	4380.73	0.32562	0.102371	0	1	1	4380.73	0.155386	0.102344	0	1	1
ENSMUSG00000003382.18	2599.27	2742.77	2125.42	1896.42	3561.41	3862.25	3312.68	3163	3209.48	4097.48	3849.59	3391	4715	6563.4	4894.38	4824.72	3607.87	0.459829	0.0746323	0	1	1	3607.87	0.390914	0.0737562	0	1	1
ENSMUSG00000003402.14	11666.7	13306	13854.4	11794.6	16919.2	16965.7	16272.6	14619	13540	15330	14710	13137	16302	22114.8	18457	16432	15214.4	0.246794	0.0508491	0	1	1	15214.4	0.230411	0.050772	0	1	1
ENSMUSG00000003410.8	586.32	651.485	768.29	691.194	1126.87	1090.8	1034.47	945.085	1230.32	1199.84	1026.71	1211.16	616.527	667.785	672.863	555.03	882.813	0.534334	0.103631	0	1	1	882.813	-1.01038	0.103681	-0.100113	0.920254	1
ENSMUSG00000003411.10	237	248	323	306	183	178	192	185	290	345	268	273	189	277	251	206	248.718	-0.705735	0.137151	0	1	1	248.718	-0.511977	0.134861	0	1	1
ENSMUSG00000003418.11	308	341	354	280	1461	1530	1023	1045	502	576	511	436	1181	1856	1292.01	1441	829.572	1.69152	0.122353	5.65183	1.58749e-08	2.24987e-06	829.572	1.16351	0.119692	1.36609	0.171911	1
ENSMUSG00000003420.8	454.43	461.225	806.248	685.901	1112.25	1129.78	1148.11	1058.58	352.209	332.735	336	337.826	566.076	579.925	570.651	425.487	648.525	0.745977	0.183631	0	1	1	648.525	0.596318	0.186805	0	1	1
ENSMUSG00000003421.13	5837.71	6706.23	7087.48	6216.44	6995.72	6906.36	7080.79	6451.98	7179.72	7692.52	7556.49	7093.18	5962.13	7975.62	7150.88	6221.26	6867.99	-0.0154275	0.0589767	0	1	1	6867.99	-0.112314	0.058902	0	1	1
ENSMUSG00000003423.15	3048.44	3397.73	4190.51	3892.08	4218.05	4188.85	4329.43	3943.89	2907.28	3344.04	3451.2	3159.48	2862.89	3911.64	3628.08	3187	3603.72	0.0837283	0.0919251	0	1	1	3603.72	-0.00349266	0.0921919	0	1	1
ENSMUSG00000003429.11	21397.8	24124.1	23343.9	21974.8	27451	27530.2	30032.6	26701.1	23506.2	26486.8	24847.1	23218.3	24954.1	31662.7	30741.8	25768.2	25727.5	0.144562	0.0427229	0	1	1	25727.5	0.0675685	0.0427024	0	1	1
ENSMUSG00000003435.9	20681.8	22619.3	24565.8	22353.9	33106.5	32932.8	33100.1	30751.2	33636.4	37635.2	36316.9	33336.7	32145.3	43606.3	38167.9	35463.5	31673.6	0.405218	0.054364	0	1	1	31673.6	-0.0437258	0.05427	0	1	1
ENSMUSG00000003436.11	318.91	305.693	403.441	386.683	213.078	166.147	212.256	197.243	456.063	448.999	390.283	381.977	236.972	343.773	307.088	339.091	321.141	-0.902879	0.154858	0	1	1	321.141	-0.67251	0.151107	0	1	1
ENSMUSG00000003437.14	6295.1	7148.28	7920.6	7113.85	8260.01	8335.75	8732.99	7856.26	7940.4	9116.13	8670.55	7932.99	7572.42	10130.5	8922.74	8189.04	8105.48	0.0938181	0.0613227	0	1	1	8105.48	0.0164976	0.0612132	0	1	1
ENSMUSG00000003438.17	5380	5619	6617	6270	7557	6791	7614	6810	6575	7378	7603	6991	5124.01	6636	6192	5523	6541.88	0.129333	0.0719207	0	1	1	6541.88	-0.381197	0.0719434	0	1	1
ENSMUSG00000003444.8	3369	3712	3515	3297	2910	2818	2679	2528	2688	3129	3009	2858	1901	2338	2201	1855	2819.88	-0.447732	0.0488331	0	1	1	2819.88	-0.626183	0.0497534	0	1	1
ENSMUSG00000003452.15	935.645	984.284	805.699	674.148	1072.88	1131.79	1066.56	1032.88	1044.07	1314.86	1180.27	1035.59	1644.38	2312.49	1818.99	1784.42	1230.78	0.0687557	0.0793716	0	1	1	1230.78	0.653817	0.0770263	0	1	1
ENSMUSG00000003458.12	4853.42	4953.56	4816.27	4228.8	6222.48	6234.2	6192.69	5838.55	7205	8719.83	8069.8	6896.32	10902.8	16932.2	13431.3	13648.5	7965.12	0.264318	0.0564875	0	1	1	7965.12	0.744657	0.0556885	0	1	1
ENSMUSG00000003464.13	6637.42	6992.04	6719.63	6129.99	7697.59	7423.04	7936.42	7432.72	10552	12086.1	11783.4	10711.3	10601.2	14429.5	12188.6	11275.4	9358.48	0.16206	0.0354999	0	1	1	9358.48	0.0957803	0.0346834	0	1	1
ENSMUSG00000003469.9	401	437	486	477	540	536	560	510	807	824	829	763	839	1227	963	1028	685.41	0.251899	0.112218	0	1	1	685.41	0.425598	0.107873	0	1	1
ENSMUSG00000003476.16	113	96	66	60	50	41	51	44	51	44.0001	36	33	28	32	24	25	48.3665	-0.747885	0.221107	0	1	1	48.3665	-0.447066	0.251907	0	1	1
ENSMUSG00000003484.4	3.00349	1	9.03934	6	3.01526	2	5	2.00446	1.00074	0	2	0	1	7	0	1.0011	3.17593	-0.907004	1.12089	0	1	1	3.17593	2.02171	1.37846	0.741199	0.458573	1
ENSMUSG00000003500.13	5592	6125	7806	7408	5008	5341.01	5105	4913	9535	10040	9394	9150	4875	6354	5527	5328	6763.32	-0.524604	0.0973712	0	1	1	6763.32	-0.885824	0.0972192	0	1	1
ENSMUSG00000003518.13	1388.27	1371.22	1177.49	977.478	1234.44	1268.78	1304.02	1173.21	1353.75	1443.36	1206.12	1129.49	1017.05	1253.72	1232.49	1245.82	1237.93	-0.107409	0.11085	0	1	1	1237.93	-0.218557	0.110863	0	1	1
ENSMUSG00000003526.12	940.831	1086.51	1482.68	1240.36	1997.63	1858.11	1975.05	1767.85	1312.73	1584.01	1601.87	1472.94	1777.09	2251.77	2148.44	2003.81	1629.21	0.342873	0.088756	0	1	1	1629.21	0.390616	0.0881435	0	1	1
ENSMUSG00000003527.9	2966.71	3114.41	2912.74	2757.38	3933.32	3877.19	4002.65	3826.12	3477.01	3941.26	3765.15	3508.02	3882.87	5473.98	4774.58	4361.08	3757.31	0.302319	0.0368509	0	1	1	3757.31	0.269616	0.0361003	0	1	1
ENSMUSG00000003528.15	7250	7628	7982	7447	7353	7030	7225	6546	7364	7873	7221	7020	5017	6744	6164	5354	6979.87	-0.227148	0.0547753	0	1	1	6979.87	-0.479514	0.0549423	0	1	1
ENSMUSG00000003531.15	834.031	984.544	1101.04	962.023	1017.51	990.091	1013.55	863.035	1382.61	1521.58	1455.63	1336	1048.02	1362.08	1200.59	1076.55	1135	-0.0791416	0.0824454	0	1	1	1135	-0.419902	0.0808636	0	1	1
ENSMUSG00000003534.17	3890	4216	4179	3776.01	2295	2274	2885	2707	3158	3356	3286	3229	2545	3731	3135	2931	3238.99	-0.747499	0.0836832	0	1	1	3238.99	-0.249458	0.0836625	0	1	1
ENSMUSG00000003541.6	373	440	387	335	320	356	315	300	647	657	545	501	301	366	321	269	404.499	-0.34927	0.0990564	0	1	1	404.499	-1.03899	0.096901	-0.402409	0.687383	1
ENSMUSG00000003545.3	83	89	78	63	52	60	49	45.9999	138	174	166	123	64	122	102	96	93.3264	-0.61154	0.197763	0	1	1	93.3264	-0.797807	0.177169	0	1	1
ENSMUSG00000003546.10	2157	2412	2342	2003	3656	3582	3902	3515	2044	2432	2327	2062	3123	4141	3532	3357	2880.99	0.621617	0.0417465	0	1	1	2880.99	0.545634	0.0418363	0	1	1
ENSMUSG00000003549.9	2217.22	2491.66	2420.66	2237.28	2610.56	2534.43	2622.62	2362.58	2607.55	3064.85	3146.88	2683.69	2893.58	4143.33	3744.34	3359.88	2807.37	0.0128892	0.0584752	0	1	1	2807.37	0.255127	0.0576343	0	1	1
ENSMUSG00000003555.8	2	2	1	3	2	3	1	0	5	1	1	0	1	4	1	1.99999	2.35624	-0.603521	1.25476	0	1	NA	2.35624	-0.21212	1.25003	0	1	NA
ENSMUSG00000003559.8	1105	1194	993	784	1390	1352	1170	1151	1768	2092	1989	1800	1633	2270	1811	1832	1507.82	0.233525	0.0774818	0	1	1	1507.82	-0.11591	0.0750305	0	1	1
ENSMUSG00000003573.15	1261.06	1417.92	1200.72	1072.72	949.584	912.951	1157.8	994.263	1159.45	1353.58	1251.87	1248.17	793.88	1023.43	918.928	895.286	1110.03	-0.347072	0.0725987	0	1	1	1110.03	-0.616096	0.0729504	0	1	1
ENSMUSG00000003575.13	1590	1710	1774	1577.01	2959.05	3218	2855	2734.07	2063	2461	2870	2561	3761.01	5063.02	4613	4228	2737.17	0.365627	0.0673096	0	1	1	2737.17	0.501002	0.0660983	0	1	1
ENSMUSG00000003581.14	466	502	552	410	612	628	624	620	554	622	623	588	735	1039	950	896	644.721	0.287927	0.0730196	0	1	1	644.721	0.492159	0.0697622	0	1	1
ENSMUSG00000003585.13	692	777	555	468	670	647	673	649	775	910	803	753	796	1026	829	749	733.424	0.139427	0.140386	0	1	1	733.424	0.0760986	0.139087	0	1	1
ENSMUSG00000003604.14	4153.14	4748.99	5452.12	4857.19	3763.81	3851.37	3400.6	3367.83	4260.79	4770.94	5386.2	5028.76	2266.83	3077.85	2848.03	2455.88	4001.15	-0.538175	0.0823263	0	1	1	4001.15	-0.932543	0.0826396	0	1	1
ENSMUSG00000003617.16	7	6	4	5	2.00109	5	8	5	3	1.00125	2	3.0615	3.78409	8.19128	6	4	5.59015	-0.605781	0.771456	0	1	1	5.59015	1.61467	0.853567	0.720115	0.471454	1
ENSMUSG00000003623.4	1844.6	1983.06	2161.38	1975.54	2129.09	2374.3	2190.04	2228.02	3466.68	3914.89	3591.68	3376.98	2965.48	4142.08	3303.85	3274.28	2790.54	0.0771196	0.0621661	0	1	1	2790.54	-0.17083	0.0605733	0	1	1
ENSMUSG00000003644.17	16468	17864	18878	17325	18744	19414	20321	18984	18264	20691	20361	18383	16294	21979	18941	16963	18701.4	0.035744	0.0442878	0	1	1	18701.4	-0.130723	0.0442748	0	1	1
ENSMUSG00000003657.9	277	271	190	170	476	393	326	310	762	634	674	693	1093	1211	1280	923	595.096	0.636596	0.15403	0	1	1	595.096	0.571327	0.145741	0	1	1
ENSMUSG00000003660.10	62502.6	62011.6	48211.3	43158.3	71174.9	77156.4	67466.4	63807	49137.7	57119.3	53905.4	49685.2	72280.1	97918.2	82897.9	78696.6	64100.5	0.27562	0.06937	0	1	1	64100.5	0.532566	0.0693636	0	1	1
ENSMUSG00000003662.10	6853.67	6989.06	6818.26	6093.04	6259.45	5835.45	6192.68	5902.93	5368.76	5947.24	6037.3	5464.19	5584.83	7254.21	6659.77	5933.8	6204.54	-0.322782	0.052465	0	1	1	6204.54	0.00289082	0.0525594	0	1	1
ENSMUSG00000003665.7	14.0003	24.0003	17	15.0001	13.0001	9.00002	12	12	11	17.003	9.0002	13	15	20	12.0002	9.00009	14.0584	-0.646857	0.405483	0	1	1	14.0584	-0.0604483	0.409831	0	1	1
ENSMUSG00000003680.16	3326	3894	4057	3540.6	3465	3318	3215.05	2969	3641.81	4000	3949.95	3859	3136	4311	3851	3409.39	3618.17	-0.281203	0.056833	0	1	1	3618.17	-0.145182	0.0566263	0	1	1
ENSMUSG00000003721.14	1182	1347	1141	948	1441	1522	1395	1281	2497	3029	2554	2254	2870	3866	3063	2915	2078.68	0.131804	0.0748502	0	1	1	2078.68	0.0884411	0.0717456	0	1	1
ENSMUSG00000003731.13	11326.2	11871.1	10429.8	8966.46	8932.2	9290.02	9578.04	9102.22	11876	13656.3	13201.1	12001.9	10101.5	12780.8	11146	10209.7	10884.5	-0.341531	0.04883	0	1	1	10884.5	-0.270642	0.0486564	0	1	1
ENSMUSG00000003746.16	267	338	284	273	314	338	342	306	76.0001	99	95	79	45	75	53	40	191.401	0.167636	0.126076	0	1	1	191.401	-0.849611	0.168315	0	1	1
ENSMUSG00000003752.9	1419.35	1578.38	1352.14	1215.2	1550.85	1633.88	1368.39	1340.23	1595.35	2005.35	1819.36	1628.61	1956.2	2688.48	2097.32	2056.31	1691.96	-0.0421016	0.0660143	0	1	1	1691.96	0.221884	0.0645284	0	1	1
ENSMUSG00000003762.13	771.126	826.795	1063.34	937.577	870.012	806.155	818.341	765.781	786.68	766.137	779.313	683.958	897.467	1433.09	1143.28	1116.09	898.754	-0.221638	0.0906473	0	1	1	898.754	0.524841	0.09029	0	1	1
ENSMUSG00000003778.14	14706	15549.2	14260.5	12332.9	21074.5	21840.2	21458.3	20163.9	13077.8	15076	14708.8	13692.8	19219.1	26024.3	22592.7	20876	17703.3	0.454756	0.0197676	0	1	1	17703.3	0.491878	0.0197465	0	1	1
ENSMUSG00000003779.16	27024.7	29159.1	27224.7	24731.7	26143.3	26148.9	27209.4	25221.3	27038.9	29302.3	29040.1	27483.3	19961.7	23711.1	24249	19287.9	25882	-0.135431	0.0513043	0	1	1	25882	-0.484447	0.0513367	0	1	1
ENSMUSG00000003808.18	14581.2	16324.6	15015.8	13927.1	10556.9	10454.5	10428.4	9771.31	12676.1	13590.6	13321.4	12760.1	8745.89	11126.3	10210.3	9044.48	12097.8	-0.627286	0.0350389	0	1	1	12097.8	-0.52331	0.0351536	0	1	1
ENSMUSG00000003809.14	2665	2921.01	2908.99	2649	3901	3929	3672	3467.01	3408	3884	3510	3297	3568	4590	4178	3949	3536.76	0.470953	0.0635325	0	1	1	3536.76	0.276062	0.0631438	0	1	1
ENSMUSG00000003810.12	5656	5947.99	5892	5538	6495.99	6456	7276.99	6622	8543	10011	9588.01	8979	7055	9544	8112	7279	7382.19	0.162487	0.0579395	0	1	1	7382.19	-0.235438	0.057543	0	1	1
ENSMUSG00000003812.13	1401.87	1544.51	1469.35	1283.57	1990.34	1916.69	1910.98	1768.89	1489.67	1696.39	1618.03	1465.15	2049.95	2838.19	2339.18	2421.61	1813.09	0.36436	0.0486652	0	1	1	1813.09	0.5592	0.0477379	0	1	1
ENSMUSG00000003813.15	6439.09	7145.06	6837.61	6000.75	8227.75	8215.89	7719.22	7253.47	6952.4	7646.49	6985.82	6663.35	6145.36	8350.74	7426.32	6449.84	7125.79	0.132887	0.0382842	0	1	1	7125.79	-0.0286657	0.0383193	0	1	1
ENSMUSG00000003814.8	68739	76336	70054	64541	62711	63411	65752	61210	56718	62433	61815	56560	46021	54423	47929	37141	59927.4	-0.253789	0.0617181	0	1	1	59927.4	-0.45969	0.0617539	0	1	1
ENSMUSG00000003824.12	2358	2594	2904	2567	2387	2375	2732	2326	3105	2880	2842	2818	1681	2202	2210	1853	2534.52	-0.313924	0.0910084	0	1	1	2534.52	-0.897032	0.0911798	0	1	1
ENSMUSG00000003847.16	6731.27	6097.93	4089.55	3248.16	4819.58	5138.33	4608.46	4676.16	4780.7	6605.94	5911.86	5323.72	4814.99	7197.84	5275.09	5305.32	5257.27	-0.256651	0.129981	0	1	1	5257.27	-0.0629461	0.129873	0	1	1
ENSMUSG00000003848.14	11599.7	13018	12703.8	11699.7	8977.48	8947.28	9565.3	8965.82	8660.46	9594.24	9915.29	9656.49	7919.2	10359.5	9945.6	8723	10058.7	-0.539401	0.0570042	0	1	1	10058.7	-0.170114	0.0571124	0	1	1
ENSMUSG00000003849.8	1145	1206	1514	1452	1172	1279	1072	1121	878	955	1108	904	860	1311	1015	1026	1129.07	-0.306278	0.112747	0	1	1	1129.07	-0.00673367	0.113656	0	1	1
ENSMUSG00000003863.18	659.001	675	796.999	724.999	684.999	695	754	759.999	801	1004	845	836.999	1161	1810	1431	1488	922.464	-0.150669	0.0918035	0	1	1	922.464	0.627306	0.0890957	0	1	1
ENSMUSG00000003865.16	8170.36	8017.52	7034.82	6221.78	6497.67	6417.38	6304.53	5516.67	8354.77	11016.2	9853.87	8282.16	8393.53	12962.3	8988.65	9684.63	8198.13	-0.260766	0.0728467	0	1	1	8198.13	0.104768	0.0725257	0	1	1
ENSMUSG00000003868.14	30321.1	33592.2	33065	29169.5	26558.8	25548.4	27253.6	24401.7	33713.8	36293.1	35515.3	33476.3	24997.9	32402.8	29843.8	25057.7	30194.7	-0.416104	0.0444836	0	1	1	30194.7	-0.472637	0.0444508	0	1	1
ENSMUSG00000003872.9	74	131	142	109	211	193	253	170	145	217	187	159	233	327	245	218	187.26	0.924533	0.166677	0	1	1	187.26	0.366244	0.160341	0	1	1
ENSMUSG00000003873.11	23445.2	25710.4	21894.1	20269.8	17265.1	16873.7	17583.1	16331.6	20290.5	21971.4	22006.2	20259.3	14452.6	18334.2	17524.3	15538	19448.6	-0.503754	0.0377488	0	1	1	19448.6	-0.508956	0.0377889	0	1	1
ENSMUSG00000003882.5	9.21044	1.0101	3.09034	1.03233	2.09179	8.16609	6.54021	2.05919	5.33982	1.06072	3.17673	4.05989	1.33232	7.30599	3.20286	6.38215	3.87813	0.342493	0.854794	0	1	1	3.87813	0.206197	0.86838	0	1	1
ENSMUSG00000003923.14	9477.7	10439.2	9954.76	8934.55	8137.54	8179.97	8407.47	8138.19	6218.78	6979.34	6832.65	6466.66	3997.29	5208.71	4535.17	4192.09	7216.34	-0.31318	0.0366747	0	1	1	7216.34	-0.470154	0.0377304	0	1	1
ENSMUSG00000003929.11	1379.41	1347.73	1219.42	1069.43	1688.7	1706.12	1595.01	1479.27	1112.77	1322.39	1232.17	1140.2	1468.12	1934.47	1525.5	1509.58	1416.96	0.360921	0.0789583	0	1	1	1416.96	0.345505	0.0790712	0	1	1
ENSMUSG00000003934.5	352	392	417	401	816	832	921	835	973	1140	1105	856	780	1222	920	874	793.734	1.02436	0.0920077	0.264772	0.791185	1	793.734	-0.236407	0.0871335	0	1	1
ENSMUSG00000003948.17	308.376	284.477	276.739	249.721	291.523	289.037	239.775	240.847	534.78	595.281	437.076	392.325	404.083	550.934	463.624	438.089	372.82	-0.159806	0.116191	0	1	1	372.82	-0.216442	0.108964	0	1	1
ENSMUSG00000003949.16	465	507	463	441	564	528	670	694	110	106	187	174	295.999	284	330	225	385.23	0.145459	0.21287	0	1	1	385.23	0.917031	0.220778	0	1	1
ENSMUSG00000003955.8	4022	4218	3401	2984	3231.93	3124	2987	2761.9	4917.99	5245.99	4555.99	4577	3025.97	3776.93	3677.98	3021.94	3734.35	-0.387389	0.0689197	0	1	1	3734.35	-0.646123	0.0685421	0	1	1
ENSMUSG00000003970.9	196466	219434	201677	184308	186025	176132	197480	179449	177404	183451	183338	173496	152691	190190	182647	157606	184215	-0.222337	0.0481919	0	1	1	184215	-0.210634	0.0481977	0	1	1
ENSMUSG00000003974.6	2	3	5	1	6	3	3	8	0	1	0	0	1	0	0	0	2.0773	0.796445	0.941764	0	1	NA	2.0773	-0.119717	1.63506	0	1	NA
ENSMUSG00000003992.15	293.345	276.672	338.479	357.742	570.667	564.188	584.089	521.24	70.0924	50.6894	87.6714	78.0178	132.567	138.823	115.239	92.8587	249.884	0.572541	0.147884	0	1	1	249.884	0.722431	0.175717	0	1	1
ENSMUSG00000004018.9	2304.24	2464.83	3187.34	2908.7	2375.5	2361.21	2747.63	2557.03	2863.62	3239.58	3302.67	3115.18	1703.95	2415.59	2151.66	1925.05	2622.46	-0.248169	0.104303	0	1	1	2622.46	-0.778202	0.104426	0	1	1
ENSMUSG00000004031.13	89.0002	113.001	89.0427	83.1128	99.8674	121.26	127	125.002	130	167.001	106	128.14	112.125	116.334	121.261	86.0781	113.229	0.241892	0.161562	0	1	1	113.229	-0.442695	0.157637	0	1	1
ENSMUSG00000004032.10	240	351	284	265	251	218	235	265	494	510	445	408	374	471	378	386	347.814	-0.325197	0.113787	0	1	1	347.814	-0.341217	0.106739	0	1	1
ENSMUSG00000004035.12	94.0065	115.005	137	110	119	167	131.001	113	201	223	200.005	151	81.1418	119.008	75.0075	83	133.265	0.286472	0.201463	0	1	1	133.265	-1.02195	0.201707	-0.108812	0.913352	1
ENSMUSG00000004038.9	71.2131	83.208	98	119.874	89.938	105.228	124.076	133.23	97.1903	145.152	100.741	95.8665	53.9968	90.6083	55.0693	66.1177	96.0874	0.167632	0.214758	0	1	1	96.0874	-0.859782	0.220655	0	1	1
ENSMUSG00000004040.16	12359.5	13671.7	12724.1	10856.6	15887.5	16336.6	16341.4	15184.6	14563.8	18553.7	18224.3	16405.9	15818.1	21144.3	18066.7	16744	15733	0.228477	0.0451416	0	1	1	15733	0.0725621	0.0449783	0	1	1
ENSMUSG00000004043.14	293.203	291.008	268.485	252.153	536.284	486.235	489.666	458.761	485.203	610.936	583.618	500.342	346.024	466.833	392.06	415.645	432.806	0.756902	0.101181	0	1	1	432.806	-0.452245	0.0977156	0	1	1
ENSMUSG00000004044.9	3047	3249	2898	2513	3338	3594	3148	2812	7206	8694	8085	7025	3062	4159	3393	3227	4342.34	0.0714957	0.0539616	0	1	1	4342.34	-1.26856	0.0528268	-5.08385	3.69868e-07	2.33149e-05
ENSMUSG00000004054.9	2404	2467.21	2221	2040	3615	3670	3733	3619.25	3738	4640	4526	3971	4076	5462	4757	4473.56	3670.57	0.677448	0.0719067	0	1	1	3670.57	0.186227	0.0709694	0	1	1
ENSMUSG00000004056.15	8767.08	9299.07	9204.26	8303.62	9314.68	9154.65	9557.24	8932.26	7629.77	9010.62	9231.44	8255.64	7417.58	9612.74	8657.52	8060.4	8765.4	-0.00708638	0.0401857	0	1	1	8765.4	-0.0531967	0.04029	0	1	1
ENSMUSG00000004069.17	10015.9	11209.7	9783.17	8657.16	7974.97	8002.3	8432.16	7914.94	7997.25	9152.15	9010.57	8380.29	7107.2	9513.47	8230.33	7624.37	8699.23	-0.390509	0.0327106	0	1	1	8699.23	-0.220498	0.0328323	0	1	1
ENSMUSG00000004070.15	3246.26	3482.33	3586.01	3386.38	3013.08	3065.04	3079.61	2935.39	4161.24	4627.44	4535.83	4253.5	2721.92	3594.68	3107.98	2954.19	3503.16	-0.341776	0.0463656	0	1	1	3503.16	-0.674769	0.0459768	0	1	1
ENSMUSG00000004071.13	4064.16	4244.32	3430.83	3099.25	4070.35	4135.09	3756.89	3701.02	4080.41	4877.87	4683.88	4107.48	4486.56	6329.48	5106.13	4900	4280.53	0.0622349	0.0475254	0	1	1	4280.53	0.0983946	0.0469364	0	1	1
ENSMUSG00000004085.14	1793.22	1872.32	881.513	863.409	641.809	784.987	765.423	728.818	1291.03	1562.65	1509.74	1400.61	970.141	1384.65	1130.24	1097.46	1173.81	-1.047	0.152668	-0.307832	0.75821	1	1173.81	-0.688504	0.151714	0	1	1
ENSMUSG00000004096.9	7947	8948	7748.99	6911	7325	7245.01	7033	6676	7896.01	9010	8629	7947	6618	8977.01	7897	7207	7743.26	-0.249359	0.0342742	0	1	1	7743.26	-0.246258	0.0341413	0	1	1
ENSMUSG00000004098.7	474	535	762	651	709	741	763	730	591	574	462	492	257	349	348	304	550.812	0.176635	0.141482	0	1	1	550.812	-0.881293	0.14528	0	1	1
ENSMUSG00000004099.16	37005.7	40007.4	38745.7	33214.3	42816.5	44596.4	45444.9	40869.2	41336.7	47519.1	44880.7	41123.6	36246.3	44550	41980.8	35524.6	40916.6	0.116107	0.0373032	0	1	1	40916.6	-0.260496	0.0372922	0	1	1
ENSMUSG00000004100.12	19635.5	22524.1	22116.8	19698.9	21279.7	20769.4	23453.9	20870.8	20359.4	22601.3	23312.7	22132.8	18465.1	23229.4	22914.3	19469.1	21430.3	-0.060889	0.0610024	0	1	1	21430.3	-0.209427	0.0609993	0	1	1
ENSMUSG00000004105.8	55	56	28	40	65	56	63	60	71	89	95	90	262	370	288	298	118.311	0.229122	0.172228	0	1	1	118.311	1.68945	0.131077	5.25988	1.44152e-07	9.94787e-06
ENSMUSG00000004110.16	47.6458	46.414	49.002	26.6167	29.0199	39.7441	62.2354	41.5109	7.81504	16.88	21.1088	31.1803	41.0765	66.7413	37.2794	46.6455	40.5266	0.39883	0.465896	0	1	1	40.5266	1.41535	0.481391	0.862818	0.388237	1
ENSMUSG00000004113.18	319.648	250.077	270.803	247.391	678.008	675.495	841.497	789.477	511.112	624.179	493.958	503.5	722.87	824.641	777.03	661.591	577.043	1.51632	0.172977	2.98494	0.00283635	0.128513	577.043	0.401839	0.170202	0	1	1
ENSMUSG00000004127.12	3600.15	3860.76	3746.42	3597.31	2883.73	2969.24	2965.06	2721.9	2909.53	3421.09	3476.7	3196.88	2158.54	2759.85	2555.11	2248.25	3044.61	-0.338626	0.046554	0	1	1	3044.61	-0.187295	0.0471394	0	1	1
ENSMUSG00000004151.17	5066.99	5358.32	4592.54	3837.81	5693.07	5908.03	5371.19	5322.48	1964.88	2241.87	2511.41	2250.63	3846.81	5706.53	3921.42	4060.18	4213.63	0.0803086	0.0786707	0	1	1	4213.63	0.883836	0.0796081	0	1	1
ENSMUSG00000004187.11	919.136	1050.11	1279.09	1229.27	1888.37	1898.33	1979.72	1795.24	1617.4	1866.68	1434.29	1397.32	2443.61	3493.27	2934.91	3053.55	1888.42	0.607058	0.110079	0	1	1	1888.42	0.778152	0.109015	0	1	1
ENSMUSG00000004207.14	17861	18883	19858	18202	28139	28552	26674	25175	16152	18353	16387	14402	17767	24141	20542	19041	20531.9	0.435482	0.0571051	0	1	1	20531.9	0.189555	0.0571995	0	1	1
ENSMUSG00000004221.16	1415.97	1427.69	1348.55	1209.48	2062.91	2235.41	2092.78	2057.84	1222.24	1496.17	1348.19	1255.33	1764.41	2394.14	1972.92	1840.25	1679.57	0.443744	0.0935336	0	1	1	1679.57	0.471027	0.0936464	0	1	1
ENSMUSG00000004231.15	39	36	23	43	24	21	20	25.0001	19	27	35	40	9	15	16	13	25.497	-0.700612	0.305264	0	1	1	25.497	-1.27522	0.335111	-0.821275	0.41149	1
ENSMUSG00000004233.14	740.135	767.316	692.473	631.739	696.16	681.638	781.63	696.527	519.715	656.192	705.156	640.203	785.365	1052.37	958.513	866.529	739.794	0.0512309	0.0964581	0	1	1	739.794	0.488361	0.0960734	0	1	1
ENSMUSG00000004263.15	5675.76	5599.27	5877.94	5471.56	7533.68	7933.1	7124.53	7068.16	6549.24	8115.47	8301.78	7395.82	9353.55	13586.3	10737.3	10974.3	7787.81	0.00593012	0.0565335	0	1	1	7787.81	0.438622	0.0561232	0	1	1
ENSMUSG00000004264.17	42268	47748	48060.9	43203	34310	32638	35146	31648	43623	47916	48268	45221	27512	34730	32465	28100	39237.8	-0.547814	0.0509026	0	1	1	39237.8	-0.73451	0.0509154	0	1	1
ENSMUSG00000004266.15	1692	1666.99	1903	1833	2047	2012	2291	2123	2573	2740	2545	2384	2180	2838	2854	2283	2244.88	0.199885	0.0864741	0	1	1	2244.88	-0.0664253	0.0857316	0	1	1
ENSMUSG00000004267.16	187.247	216.001	171.336	122	278.376	279	264.002	293.949	518.801	543.263	368.001	352.877	764.001	1053.4	870.221	894	434.729	0.64426	0.155753	0	1	1	434.729	0.630838	0.145104	0	1	1
ENSMUSG00000004268.11	17987.5	20323.6	19971.8	18043.7	11844.8	11650.6	11525.7	10653.7	15454.9	16532.8	16552.3	15896	8692.6	10904.8	10410.4	9054.49	14294.4	-0.858149	0.0493521	0	1	1	14294.4	-0.884261	0.0494851	0	1	1
ENSMUSG00000004270.13	2785.01	2895.73	2924.42	2594.75	3623.89	3503.04	3441.35	3315.69	3893.68	4774.44	4396.44	3785.64	3491.75	5032.94	4301.58	4063.98	3647.22	0.195865	0.0370283	0	1	1	3647.22	-0.0304482	0.0358293	0	1	1
ENSMUSG00000004285.12	5476	5986	5683.95	5352	5636.98	5142.98	5389.96	4764	5593.96	6117.97	6121.99	5615	4658	6736.99	5698.97	5206.93	5571.3	-0.214782	0.0491013	0	1	1	5571.3	-0.220392	0.0490124	0	1	1
ENSMUSG00000004296.14	2	1.00143	0	0	0	0	0	1	1	1.00372	0	2.00481	0	0	2.00489	1.01109	0.693966	-1.36757	1.96163	-0.187383	0.851361	NA	0.693966	-0.545317	1.81682	0	1	NA
ENSMUSG00000004317.14	1353	1396.01	1319	1195	564	701.001	575	518	1180	1329	1033	1093	557	709	600	618	934.06	-1.22007	0.0899209	-2.44738	0.0143901	0.509859	934.06	-0.952841	0.0900142	0	1	1
ENSMUSG00000004319.15	5956.64	6188.15	5864.37	5058.22	6222.75	6801.35	6164.74	5800.19	7996.9	9283.76	8167.03	7511.04	6640.45	8840.97	7166.54	6790.89	6868.53	0.0451617	0.0416938	0	1	1	6868.53	-0.267105	0.0412189	0	1	1
ENSMUSG00000004328.15	795.907	848.835	1119.96	949.814	604.902	715.227	844	799.867	377.488	504.927	424	425.959	507	726.829	647.932	621.574	687.426	-0.512801	0.144075	0	1	1	687.426	0.277126	0.146813	0	1	1
ENSMUSG00000004341.8	127	148	94	73	15	8	25	17	34	27	27	47	5	4	10	0	43.042	-2.89065	0.362645	-5.21349	1.85322e-07	2.27221e-05	43.042	-2.97225	0.469072	-4.20457	2.61582e-05	0.00118792
ENSMUSG00000004347.16	18	28.0991	24.1865	20.0498	48.127	40.0116	66.1305	55.0331	11.0841	12.0005	9.06517	14.0521	42.005	39.1606	43.0495	46.2567	31.3506	1.00423	0.30155	0.0140284	0.988807	1	31.3506	1.69833	0.340552	2.05057	0.0403086	0.676089
ENSMUSG00000004356.8	39497	38645	29560	25875	21931	23990	24242	22212	26120.9	31848	31524	28298.1	20743	27257	23466	21548.5	27287.7	-0.594476	0.0803633	0	1	1	27287.7	-0.408439	0.0803763	0	1	1
ENSMUSG00000004359.16	247.138	278.905	507.251	431.085	183.787	139.034	218.346	173.842	263.169	271.892	335.425	416.735	322.996	524.208	418.583	425.156	326.301	-1.17908	0.261375	-0.685153	0.493247	1	326.301	0.177321	0.25864	0	1	1
ENSMUSG00000004360.9	647.394	713.494	500.569	432.273	658.12	745.45	475.241	549.211	116.732	110.882	182.725	198.03	207.694	161.654	209.507	182.687	383.091	0.00188926	0.220428	0	1	1	383.091	0.232125	0.229964	0	1	1
ENSMUSG00000004364.14	17174	18490	15885	13907	14534	15677	15210	15158	17879	20754.1	20692	18463	18384	25240	20878	19785.1	17935.4	-0.244875	0.0474849	0	1	1	17935.4	0.0516378	0.0473311	0	1	1
ENSMUSG00000004366.4	5	7	6	8	12	8	8	4	3	2	2	6	4	9	12	9	6.49421	0.179861	0.551789	0	1	1	6.49421	1.22795	0.616905	0.369504	0.711752	1
ENSMUSG00000004371.15	36.4501	35.2223	34.3131	13.8252	25.0289	24.2936	27.136	35.1208	18.7169	21.8003	30.3181	22.671	27.3975	33.9837	30.8198	37.8631	28.7774	-0.285374	0.330917	0	1	1	28.7774	0.480617	0.334022	0	1	1
ENSMUSG00000004383.18	693.004	665.278	678.101	597.043	1553.03	1583.08	1544	1438	1067.01	1109.15	1014	1036.01	1309.01	1781	1556.01	1536	1183.72	1.13192	0.0595154	2.21654	0.0266544	0.845138	1183.72	0.430268	0.0569343	0	1	1
ENSMUSG00000004393.10	14053	14947	15099	13584	11941	11409	11808	11106	10855	12204	12670	11638	8695	10894	10315	9012	11931.4	-0.440143	0.0413566	0	1	1	11931.4	-0.314489	0.0415598	0	1	1
ENSMUSG00000004394.12	3232	3540	2893	2772	3361	3294	3163	2756	3333	3695	3697	3142	3472	4487	3817	3390	3362.61	-0.0229477	0.0523198	0	1	1	3362.61	0.0719535	0.0518905	0	1	1
ENSMUSG00000004415.15	510.398	519.109	490.934	369.487	226.759	264.268	255.139	236.178	983.033	1042.08	1005.61	945.417	1229.96	1761.81	1278.73	1487.01	736.726	-0.565787	0.108425	0	1	1	736.726	0.576787	0.0970646	0	1	1
ENSMUSG00000004446.12	3298.25	3467	3171.51	2746.12	3966.19	3950	4114	3765.54	5983.98	6853.64	7032.38	6216.57	4665.96	6155	5440	4838.63	4711.75	0.244224	0.0373447	0	1	1	4711.75	-0.40932	0.0357429	0	1	1
ENSMUSG00000004451.14	2163.01	2338.15	2297.97	2007.68	1942.09	2052.07	2053.36	1987.05	5820.02	6277.95	5741.58	5300.69	3943.01	5339.32	4609.44	4205.11	3613.69	-0.23242	0.0462699	0	1	1	3613.69	-0.483738	0.0430244	0	1	1
ENSMUSG00000004455.16	36027.4	40279.7	36294.6	32287.8	36373.2	37147.3	40054.9	36909.2	41085.7	46027.1	44216.4	41651.6	38799	51579.3	45529	41746.8	40249.8	-0.00862451	0.0339175	0	1	1	40249.8	-0.0416651	0.0338533	0	1	1
ENSMUSG00000004460.17	6940	8028	7864	7068	6220.01	6514	6434	6012	8065	8946	8684	8001	6094.01	8048	6745	6179	7257.16	-0.348785	0.0442102	0	1	1	7257.16	-0.453323	0.0440646	0	1	1
ENSMUSG00000004462.7	2753.06	2836.88	2627.98	2437.05	3011.81	3122.16	3078.29	2875.18	2504.11	2779	3017.35	2884.39	3272.09	4186.01	3683.92	3503.81	3017.57	0.0539261	0.0506989	0	1	1	3017.57	0.260671	0.0503148	0	1	1
ENSMUSG00000004473.10	115	101	105	72	168	152	136	128	53	62	63	46	142	152	102	126	106.589	0.48012	0.162315	0	1	1	106.589	1.10093	0.175394	0.575456	0.564983	1
ENSMUSG00000004500.9	471	655.001	621	648.927	843.606	864.911	834	757.92	409.824	542	662	583.851	974	1317.96	1032.88	952.889	751.55	0.363123	0.124148	0	1	1	751.55	0.833515	0.123923	0	1	1
ENSMUSG00000004508.6	16	18.0004	32.001	27.0003	24	26	21.0002	39.0008	18.0005	25.0003	11	19	39	67.9999	39.0009	45.9999	28.9435	0.354227	0.354688	0	1	1	28.9435	1.13548	0.350329	0.38671	0.698971	1
ENSMUSG00000004530.12	17800.3	19379.4	17476.4	15507.7	11796.9	12446.6	13492.5	12307.2	17382.1	19726.3	19213.6	17792.3	10042.8	11928	11350.1	9759.66	14785.6	-0.528295	0.0471473	0	1	1	14785.6	-0.713567	0.047205	0	1	1
ENSMUSG00000004535.12	16427.2	17363.7	16645.9	14805.1	18013	18671.1	18469.8	18003.8	19366.2	22476.1	22760.2	20668.7	17800.4	24193.7	20677.9	19321.7	19033.5	0.0576485	0.0293023	0	1	1	19033.5	-0.202019	0.0291255	0	1	1
ENSMUSG00000004540.7	1	2	1	2	0	1	0	0	0	0	0	0	0	0	1	3	0.702764	-2.41193	1.96299	-0.719277	0.47197	NA	0.702764	2.3641	2.00364	0.680815	0.495989	NA
ENSMUSG00000004542.15	15.167	14.169	10.1668	10.0926	16.235	21.2221	12.1666	17.2041	18.1915	10.1086	11.1338	15.152	12.2882	13.2154	17.4957	15.3404	14.1352	0.361156	0.373836	0	1	1	14.1352	-0.0399442	0.374764	0	1	1
ENSMUSG00000004552.16	8.33074	2.14952	4.24031	0	0	1	0	2.04215	0	5	1.14662	0	2.06495	0	0	0	1.58001	-2.26315	1.72706	-0.731385	0.464544	NA	1.58001	-1.60029	1.86664	-0.321588	0.747765	NA
ENSMUSG00000004558.15	581.369	603	552	554	865.338	806	911	858.336	2676.68	2379.11	1674.5	1994.01	1339.37	1399.24	1822.66	1164.03	1263.25	0.496389	0.161569	0	1	1	1263.25	-0.649822	0.158716	0	1	1
ENSMUSG00000004561.14	951.834	1023.28	1188.55	1117.68	1613.61	1654.56	1591.9	1428.28	2812.69	3399.47	3270.72	3061.61	2902.68	4148.78	3626.23	3469.23	2274.45	0.438423	0.0779981	0	1	1	2274.45	0.0167727	0.0747037	0	1	1
ENSMUSG00000004562.16	348.923	334.316	428.401	300.982	392.861	353.753	418.744	372.088	887.628	873.165	733.106	819.048	1191.3	1564.79	1304.32	1271.44	642.995	-0.827933	0.150842	0	1	1	642.995	0.253232	0.144778	0	1	1
ENSMUSG00000004565.15	12596.9	13600.6	12850.9	11840.3	11950.5	12622.5	11934.1	10926.6	14022.4	15957.1	15306.2	14009.4	9420.45	11692.6	11200.7	9738.65	12469.5	-0.278926	0.0500402	0	1	1	12469.5	-0.445454	0.0500429	0	1	1
ENSMUSG00000004567.16	1918.82	2009.05	1988.15	1645.32	3859.76	4022.08	3866.19	3688.1	1768.68	1966.37	1956.24	1853.09	4077.36	5916.03	4948.71	4824.65	3115.57	1.00953	0.0496745	0.191778	0.847916	1	3115.57	1.29969	0.0493845	6.06856	1.29062e-09	1.23322e-07
ENSMUSG00000004568.12	6824	7211.99	6908	6241	11721	12181	12493	11435	8052	8945.99	9000	8369	13102	17541	15038	13543	10376.2	0.738786	0.0517673	0	1	1	10376.2	0.575497	0.0515345	0	1	1
ENSMUSG00000004591.16	13814	14743.7	12812	11282	12520	13808.6	12726	12388	11936	13736.3	12837	11975	11402	15555	12288	11800	12868.5	-0.291897	0.0486781	0	1	1	12868.5	-0.153235	0.0487029	0	1	1
ENSMUSG00000004609.11	45.2902	54.7362	44.5871	28.2567	58.4328	40.933	62.8545	57.9459	30.5007	30.0323	28.5142	33.7784	25.3759	42.0931	38.2562	50.7379	42.1337	0.245966	0.255825	0	1	1	42.1337	0.212574	0.271932	0	1	1
ENSMUSG00000004610.4	6842.7	7580.89	6758	5951.41	6804.51	6141.92	6515.62	5879.05	6020.94	6609.95	6015.16	5510.86	5577.87	7028.27	6094.78	5584.1	6316.28	-0.275198	0.0482057	0	1	1	6316.28	-0.184764	0.0483461	0	1	1
ENSMUSG00000004612.9	1	4	6	4	3	11	9	3	1	4	3	4	0	2	0	0	3.36	0.590979	0.817774	0	1	1	3.36	-2.46071	1.26686	-1.15302	0.248903	1
ENSMUSG00000004626.14	2748.61	2884.46	3049.7	2942.22	3405.56	3315.52	3917.48	3647.59	3256.27	3305.41	3148.7	2878.27	2942.31	4254.93	3738.84	3654.17	3323.11	0.225038	0.0919783	0	1	1	3323.11	0.342059	0.0918977	0	1	1
ENSMUSG00000004630.18	4.72197	8.26372	2.66571	17.2615	6.50021	5.60536	15.0975	11.363	8.29395	4.43911	0	0	2.67511	6.6009	6.72193	2.61742	6.67933	-0.19589	0.79791	0	1	1	6.67933	0.986466	0.902557	0	1	1
ENSMUSG00000004631.15	171	184.001	177.016	160	197.002	196	170	182	141.001	132.034	140	120	312	455.003	280	322.001	205.149	0.0169683	0.123364	0	1	1	205.149	1.23273	0.121841	1.91008	0.0561234	0.887537
ENSMUSG00000004633.17	443	473	355	298	429.001	460	433	422.001	163	175	169	193	172	226	209	144	294.931	-0.242792	0.143269	0	1	1	294.931	0.10222	0.154139	0	1	1
ENSMUSG00000004637.15	697.367	798.268	837.114	773.12	1017.05	989.223	1082.17	1015.01	888.306	980.271	839.871	867.161	976.081	1475.13	1284.69	1247.46	975.873	0.197531	0.0835277	0	1	1	975.873	0.379773	0.0824865	0	1	1
ENSMUSG00000004642.13	11005.5	12334.6	12424.9	10916.9	9169.5	9027.27	9046.04	8326.62	10542.1	11360.1	11002.4	10163.3	6866.38	8966.21	7789.63	7230.56	9788.56	-0.474486	0.0420319	0	1	1	9788.56	-0.534884	0.0421896	0	1	1
ENSMUSG00000004651.6	16.5921	7.80376	17.6975	5.42642	13.6292	5.48158	9.6523	16.1376	3.46251	12.7301	5.78506	10.0448	17.1885	10.9778	9.58442	6.01317	10.8908	-0.122764	0.555444	0	1	1	10.8908	0.366371	0.569253	0	1	1
ENSMUSG00000004655.5	2	3	4	3	4	4	3	6	1	2	3	1	4	4	5	9	3.60334	0.409881	0.722511	0	1	1	3.60334	1.54755	0.786987	0.69576	0.486579	1
ENSMUSG00000004661.15	7379	7647.99	8105	7328	10173	10603	10301	9647.99	7464	8422	8671	8181	10111	13412	12335	11357	9369.61	0.303037	0.0545061	0	1	1	9369.61	0.38446	0.0544022	0	1	1
ENSMUSG00000004665.10	4519	4750	6727	6193	8336	8212	8353	7983	4547	5545	6795	5610	9972	14878	11585	11000	7722.65	0.507166	0.131087	0	1	1	7722.65	0.983796	0.131013	0	1	1
ENSMUSG00000004667.18	21898	24996	26166	23948	19827	19029	20419.9	18194	21761	22762	22040	21506	14102	17052	16624	13356	20385.7	-0.414921	0.0712141	0	1	1	20385.7	-0.665159	0.0712819	0	1	1
ENSMUSG00000004668.14	107	99	159	119	214	234	148	157	79	89	107	105	81	82	49	51	117.409	0.513126	0.199361	0	1	1	117.409	-0.583853	0.214851	0	1	1
ENSMUSG00000004677.17	4491.79	4622.84	5041.91	4659.41	7528.02	7764.31	8474.94	7501.43	5875.24	6910.25	6617.32	5979.74	7093.66	9872.68	8141.08	8040.06	6774.07	0.72807	0.0645846	0	1	1	6774.07	0.375893	0.0643407	0	1	1
ENSMUSG00000004698.10	90.2774	80.8081	122.791	115.051	140.387	163.251	119.915	90.7447	51	65.0863	66.3168	55.9356	69.1653	96.32	82.9712	59.6204	93.619	0.326133	0.228183	0	1	1	93.619	0.215653	0.242193	0	1	1
ENSMUSG00000004709.14	1	8	1	12	3	8	8	9	3	0	3	5	10	4	10	4	5.68286	0.374441	0.820467	0	1	1	5.68286	1.05322	0.872826	0.0609691	0.951384	1
ENSMUSG00000004748.5	682	800	833	777	572	510	580	598	1381	1470	1533	1339	793	944	906	806	912.424	-0.519946	0.0903627	0	1	1	912.424	-0.858031	0.0868562	0	1	1
ENSMUSG00000004768.14	6019	6102.99	4131	3697	3309.01	3475	3180	2992.99	7335	8387	7733.99	7008	5378.01	6525	5932.99	5409	5389.21	-0.873702	0.100905	0	1	1	5389.21	-0.504839	0.100368	0	1	1
ENSMUSG00000004771.12	3008	3242	3166	2888	3577	3601	3609	3289	3603	4182	3867	3423	3255	4477	3658	3540	3512.28	-0.00169106	0.0448458	0	1	1	3512.28	-0.0416473	0.0444241	0	1	1
ENSMUSG00000004788.11	6549	7153	7323	6631	6168	5984	6282	5472	6927	7698	7653	7195	4658	6285	5583	5158	6424.53	-0.234495	0.0451164	0	1	1	6424.53	-0.517706	0.0451716	0	1	1
ENSMUSG00000004789.10	9333	9690	9286	8186	9383	9203	9165	8361.5	11450	12785	11925	10820	8615.59	11652	10135.7	9627.33	9934.61	-0.0446006	0.0289697	0	1	1	9934.61	-0.196779	0.028657	0	1	1
ENSMUSG00000004791.7	45	23	38	25	17	12	17	12	38	46	34	44	8	14	8	5	24.4041	-1.31681	0.328494	-0.964421	0.334835	1	24.4041	-2.26138	0.358792	-3.51564	0.000438699	0.0149661
ENSMUSG00000004798.14	150	109	141	99	573.999	612	402	455	179	187	184	140	578	761	552	640	354.078	2.02434	0.161124	6.35744	2.05141e-10	4.0863e-08	354.078	1.73288	0.156834	4.67298	2.96866e-06	0.000160742
ENSMUSG00000004814.10	72	42	46	38	82	88	96	107	44	49	53	49	103	106	74	110	71.7215	0.818824	0.218011	0	1	1	71.7215	0.889766	0.21769	0	1	1
ENSMUSG00000004815.12	1612.99	1783.29	1518.01	1183.23	1720.95	1748.73	1812.76	1567.73	1796.93	2123.61	1904.71	1727.59	1895.01	2478.43	2258.66	2341.17	1830.38	0.0648213	0.119778	0	1	1	1830.38	0.173798	0.119203	0	1	1
ENSMUSG00000004837.2	6.64636	4.25651	4.49936	1.4339	5.04484	0	11.9256	5.85578	1.17048	4.82068	9.79619	4.21242	3.88883	9.54149	2.50695	9.32645	5.2037	0.451454	0.82874	0	1	1	5.2037	0.248736	0.807183	0	1	1
ENSMUSG00000004842.18	5.40503	2.568	10.61	2.7427	5.37405	3.08511	9.51246	6.34989	7.37253	4.47861	12.5292	8.78052	11.3652	11.1077	5.1931	8.27199	7.14367	-0.126587	0.6398	0	1	1	7.14367	0.00184244	0.592716	0	1	1
ENSMUSG00000004843.7	2065	2222	1961	1812	1640	1754	1733	1629	2321	2604	2382	2147	1823	2527	2068	2045	2044.46	-0.350846	0.0440162	0	1	1	2044.46	-0.293025	0.0428821	0	1	1
ENSMUSG00000004846.10	5312.23	6154.88	5496.71	4596.33	5592.92	5622.41	5896.97	5418.69	4709.65	5352.96	5110.46	4900.5	4938.34	6494.18	5773.38	5355.83	5411.58	-0.115637	0.0688703	0	1	1	5411.58	0.00882243	0.0689276	0	1	1
ENSMUSG00000004849.14	5452	5915	6003	5307	4251	4201	3921	3764	3475	3907	3926	3657	2010	2796	2430	2202	4015.61	-0.643704	0.0484417	0	1	1	4015.61	-0.888704	0.049871	0	1	1
ENSMUSG00000004864.13	584	690	606	559.999	566	539	750	667.999	1020	1081	852	885.001	1117	1799	1295	1494	902.296	0.0285622	0.147867	0	1	1	902.296	0.484721	0.145243	0	1	1
ENSMUSG00000004865.16	14959.6	16541.9	18052	15868.5	16530.9	17470.6	17927.2	16637.5	21036.9	24043.1	23877.7	22145.4	14170.9	17433.5	16163.4	14248.3	18024.5	-0.350366	0.0576279	0	1	1	18024.5	-0.664347	0.0575804	0	1	1
ENSMUSG00000004872.15	5.00341	10.021	1.00283	1.00059	8.00232	6.00576	4.00212	3.02951	9.00317	3.0011	7.00262	6.12841	4.00314	13.8258	0	16.0101	6.00242	0.20655	0.887104	0	1	1	6.00242	0.415174	0.840332	0	1	1
ENSMUSG00000004880.11	14417.2	15415.9	14784.6	12992.2	14336	15166.3	15938.4	14941.4	30925.7	34858.8	31206.9	29141.4	21208.1	26831.2	23542.8	21084.7	21023.2	-0.0173149	0.0436854	0	1	1	21023.2	-0.575865	0.0433235	0	1	1
ENSMUSG00000004885.5	597	717	865	751	552	618	741	732	396	413	442	393	194	209	257	176	510.656	-0.256102	0.140054	0	1	1	510.656	-1.10927	0.147945	-0.73855	0.460181	1
ENSMUSG00000004891.16	1444	1474	2007	1769	1028	1082	1022	987	1770	2089	2114	1810	571	790	640	630	1343.36	-0.802742	0.105868	0	1	1	1343.36	-1.65936	0.107063	-6.15859	7.33943e-10	7.27637e-08
ENSMUSG00000004892.13	75	89.9083	100	87.0001	145.058	139	102	113	136	164	129	143	156	201.363	167.23	148	129.816	0.271085	0.167289	0	1	1	129.816	0.156062	0.156874	0	1	1
ENSMUSG00000004894.10	1	3	0	2	6	2	2	1	5	4	6	4	6	3	5	2	4.37041	0.624803	0.903239	0	1	1	4.37041	0.193279	0.716227	0	1	1
ENSMUSG00000004895.9	10042	10936	10302	9260	8045	7957	8405	7915	9185	10210	9616	9090	7330	10034	9267	8089	9120.39	-0.422922	0.0378769	0	1	1	9120.39	-0.266396	0.0378693	0	1	1
ENSMUSG00000004896.16	2265.68	2194.85	2144.93	1750.58	2998.29	3031.11	2684.54	2495.62	1971.84	2339.12	2190.82	1940.96	2502.79	3496.58	3025.93	2969.28	2470.4	0.256931	0.0587744	0	1	1	2470.4	0.296655	0.0586506	0	1	1
ENSMUSG00000004897.16	68263	76899	79777	71402	81734	80481	84159	79145	73684	79104	81607	75198	63645	82116	77730	67650	76410.6	0.0494234	0.0568274	0	1	1	76410.6	-0.19417	0.056832	0	1	1
ENSMUSG00000004902.7	55	44	31	24	49	53	43	37	22	26	26	20	20	29	20	27	32.7538	0.151178	0.250229	0	1	1	32.7538	-0.0993071	0.285491	0	1	1
ENSMUSG00000004929.12	24186	26623	26373	23805	19199	18218	19632	17609	20024	21225	20891	20347	11975	14173	14076	11416	19554.2	-0.549481	0.0486107	0	1	1	19554.2	-0.791281	0.0487886	0	1	1
ENSMUSG00000004931.11	2915	3117	3305	2950	3234	3463	3480	3387	5935	6955	6439	5610	4810	7063	6019.99	5664	4608.7	-0.0334748	0.0481763	0	1	1	4608.7	-0.075237	0.0465949	0	1	1
ENSMUSG00000004933.17	45.0001	62	35	41	137	133	137	93.0001	257	301	248	181	384	447	402	377	194.794	1.3301	0.177369	1.86109	0.0627309	1	194.794	0.692164	0.138386	0	1	1
ENSMUSG00000004934.14	7052.95	7898.9	7478.37	6624.63	7841.65	7746.23	8226.96	7536.53	6709.97	7387.77	7156.49	6650.67	7391.9	9929.2	9202.64	8028.9	7650.14	0.0603128	0.0387578	0	1	1	7650.14	0.216619	0.0387236	0	1	1
ENSMUSG00000004936.8	8693	9334	9509	8756.38	9054.37	8923.39	9206	8560	13004.4	14711.9	13039	12770	9326	12922	10706	10696	10557.9	-0.0955109	0.0499362	0	1	1	10557.9	-0.396656	0.0496501	0	1	1
ENSMUSG00000004937.6	10939	12556	12025	11111	11380	11167	11646	10713	11256	12413	12564	11227	9354	12170	11247	9804	11350.6	-0.181467	0.0393071	0	1	1	11350.6	-0.244164	0.0393358	0	1	1
ENSMUSG00000004939.7	29.2964	37.5768	27.8264	24.3551	34.6665	22.8016	27.3215	31.0914	21.6567	27.3787	16.7834	25.748	32.6859	37.0734	21.2556	36.7278	28.3787	-0.125909	0.277969	0	1	1	28.3787	0.351374	0.284018	0	1	1
ENSMUSG00000004945.15	2700	2936	3114	2934	2582	2435	2349	2155	3144	3427	3485	3412	2097	2590	2366	2078	2755.37	-0.404885	0.0689172	0	1	1	2755.37	-0.694431	0.0688276	0	1	1
ENSMUSG00000004947.15	3301	3763	4302	4208	3746	3668.08	4059.3	3955.45	3324.49	3773	3636.44	3607.38	2998.24	3872.99	3471	3188	3697.94	-0.120552	0.097947	0	1	1	3697.94	-0.236153	0.0981147	0	1	1
ENSMUSG00000004948.12	1252	1327	1821	1648	715	744	771	718	161	115	133	147	123	136	162	121	651.771	-1.16279	0.151814	-1.07232	0.283576	1	651.771	-0.17999	0.17198	0	1	1
ENSMUSG00000004951.10	62845.8	68412.8	72298.6	67088.5	74847.9	71251.9	70144.2	65022	43020.1	47032.5	48383.6	46124.4	37664.3	47794.7	47999.5	41392.7	57184.4	-0.0549537	0.0662176	0	1	1	57184.4	-0.215648	0.0662796	0	1	1
ENSMUSG00000004952.13	2295.08	2355.37	2453.56	2298.07	1835.75	1918.97	1836.47	1710.26	1035.28	1232.33	1154.83	1019.56	1393.57	2063.06	1675.81	1633.41	1751.47	-0.534151	0.0566121	0	1	1	1751.47	0.368272	0.0589809	0	1	1
ENSMUSG00000004961.7	227	247	291	237	465	473	513	490	267	224	168	196	371	435	417	316	335.368	0.954624	0.152418	0	1	1	335.368	0.892358	0.154508	0	1	1
ENSMUSG00000004980.16	124355	137610	126892	109662	111181	113057	110827	107119	122532	137443	133263	124228	98486	124343	113174	107279	118800	-0.204889	0.0280819	0	1	1	118800	-0.297268	0.0280794	0	1	1
ENSMUSG00000004988.9	83.0002	74	88	90.0001	104	133	102	64	114	141	139	116	100	131	104	95.0001	105.195	0.341713	0.20424	0	1	1	105.195	-0.304372	0.198502	0	1	1
ENSMUSG00000004994.12	889	1030	1035	882	1491	1451	1404	1280	957.001	1028	1027	902	1228	1741	1517	1488	1201.81	0.492347	0.0777424	0	1	1	1201.81	0.525953	0.0775622	0	1	1
ENSMUSG00000004996.9	3100.25	3386.86	3245.58	2884.45	3520.62	3458.43	3627.73	3383.1	3202.02	3688.56	3720.38	3405.23	2772.18	3209.1	3126.62	2802.72	3294.37	-0.11692	0.0643437	0	1	1	3294.37	-0.419039	0.0644235	0	1	1
ENSMUSG00000005034.15	4236	4481	3832	3290	4287	4527	4551	4350	4626	5642	5177	4559	4728	6231	5173	4854	4637.51	0.121769	0.0658789	0	1	1	4637.51	-0.0300718	0.0655343	0	1	1
ENSMUSG00000005043.13	146.479	158.677	139.529	130.242	238.533	290.609	270.202	221.267	394.49	358.585	360.684	329.865	717.02	1012.55	728.301	766.485	373.279	0.63985	0.11766	0	1	1	373.279	1.03391	0.101296	0.334721	0.737836	1
ENSMUSG00000005045.16	1248	1396.24	1280	1060	2444	2509	2720.99	2308	1535	1768	1614.89	1474	2987	3944	2995	3144	2098.41	0.826633	0.136596	0	1	1	2098.41	0.744166	0.136095	0	1	1
ENSMUSG00000005054.7	1572	1733	1701	1567	1350	1323	1321	1273	1865	2040	1965	1776	1779	2274	2094	1957	1722.53	-0.430908	0.0509875	0	1	1	1722.53	-0.0591024	0.0491803	0	1	1
ENSMUSG00000005057.13	225.004	276.536	225.575	207.001	304.031	272.015	368.796	345.011	176.798	167.006	141.633	172.001	160.013	207.005	201.362	197.02	226.828	0.291146	0.122152	0	1	1	226.828	-0.0655739	0.130282	0	1	1
ENSMUSG00000005069.12	4582	5148	5468	5265	5388	5282	6023	5292	6085.99	6930	6792	6253	4990	6048	5604	5195	5649.8	0.0199522	0.0668048	0	1	1	5649.8	-0.370672	0.0666526	0	1	1
ENSMUSG00000005078.16	1294.51	1368.89	1393.44	1348.53	1547.04	1638.75	1420.69	1328.58	1451.52	1555.08	1384.71	1289.37	1584.82	2275.15	1703.53	1651.88	1507.69	0.109268	0.0788848	0	1	1	1507.69	0.250156	0.0783902	0	1	1
ENSMUSG00000005087.17	55	40	37	29	6	17	6	15	16	5	16	17	4	8	4	3	18.6252	-2.16633	0.469518	-2.4841	0.0129878	0.472869	18.6252	-1.49974	0.556398	-0.898177	0.369091	1
ENSMUSG00000005089.15	21.0768	28.247	19.1898	20.0043	21.7396	18.8845	14.7082	10.0324	10.6244	25.4957	14.0034	10.0031	11.8154	18.4626	14.5899	16.5723	18.6519	0.0474623	0.506806	0	1	1	18.6519	-0.483683	0.521226	0	1	1
ENSMUSG00000005102.13	2235	2495	2358.99	2173	2946	3146	3136	2935	3079	3399	3352	3128	3217	4222	3418	3400	3017.46	0.24375	0.0397213	0	1	1	3017.46	-0.0570967	0.038595	0	1	1
ENSMUSG00000005103.12	13910.6	14996.1	15501.1	14544.8	11282	11566.5	11472.8	10783.2	18137.8	21716	23066.4	20453.1	14619.2	20459.2	17242.2	16485.3	15994	-0.476796	0.0582443	0	1	1	15994	-0.343429	0.058022	0	1	1
ENSMUSG00000005107.13	7	9	13	9	15	15	6	10	5	10	9	2	26	33	15	22	12.8665	0.630412	0.485619	0	1	1	12.8665	1.83292	0.48823	1.706	0.0880075	1
ENSMUSG00000005124.10	155	170	197	139	217	192	189	199.999	72	67	77	97.0001	206	254	252	211	165.566	0.36212	0.205554	0	1	1	165.566	1.09341	0.21281	0.438933	0.66071	1
ENSMUSG00000005125.13	1173.67	1301.77	1891.92	1853.37	2869.2	2646.19	2567.91	2424.86	625.103	587.296	427.216	598.132	905.147	1032.5	978.28	767.785	1416.26	0.63613	0.161985	0	1	1	1416.26	0.609494	0.164944	0	1	1
ENSMUSG00000005131.4	84	95	63	47	53	49	43	55	69	52	41	61.9999	35	47	36	44	55.3829	-0.678045	0.248134	0	1	1	55.3829	-0.573363	0.257195	0	1	1
ENSMUSG00000005142.10	4629.95	4875.77	4134.54	3611.42	4045.15	4091.65	4231.09	3939.86	5135.38	5744.68	5285.09	4872.31	4437.26	6227.32	4947.67	5019.43	4681.22	-0.129123	0.0505473	0	1	1	4681.22	-0.121884	0.0500735	0	1	1
ENSMUSG00000005148.8	21779	24395	20874	17657	23929	26069	24106	23715	33084	40682.8	38253	34865	29539	38322	34184	32694	28852.7	0.118269	0.0431922	0	1	1	28852.7	-0.248959	0.0430038	0	1	1
ENSMUSG00000005150.16	2308.29	2334.8	2281.49	2065.71	2961.67	2889.08	2911.6	2742.08	2137.84	2497.93	2483.79	2345.31	2305.85	2765.92	2739.5	2488.87	2509.15	0.247991	0.0511138	0	1	1	2509.15	0.0163864	0.0512187	0	1	1
ENSMUSG00000005161.15	14076.9	14985.8	15823.7	15139.9	13589.5	12991.7	12424.8	12078.7	19038.7	19792.9	19421.7	18185.7	10826.7	13316.9	13099.5	11014.8	14797.1	-0.334545	0.0637547	0	1	1	14797.1	-0.739289	0.0637179	0	1	1
ENSMUSG00000005198.15	39591	38814	41117	37588	86925	93351	81728	80108	70596	87376	83844	74269	64890	85797	72819	66579	68478.7	1.00594	0.0515089	0.115273	0.908229	1	68478.7	-0.245917	0.0514557	0	1	1
ENSMUSG00000005202.2	0	1	1	3	0	0	0	0	2	4	1	1	0	1	1	0	1.27882	-3.41363	1.7363	-1.3901	0.1645	NA	1.27882	-2.56837	1.69383	-0.925934	0.35448	NA
ENSMUSG00000005204.12	43773	48066	44648	40334	41775	42668	41272.9	38567	37015	40863	39524	37537	33706	40793.9	36810	31257	39939	-0.0552413	0.034364	0	1	1	39939	-0.0852971	0.0344178	0	1	1
ENSMUSG00000005220.10	11	6	10	15	10	22	25	19	13	17	11	13	53	120	63.0001	81	28.7115	0.533561	0.501893	0	1	1	28.7115	1.95872	0.469566	2.04171	0.04118	0.686345
ENSMUSG00000005225.15	4430.29	4725.69	4385.74	3829.61	3652.98	3965.76	3821.08	3607.23	4837.65	6419.7	5692.65	5102.91	4215.9	5674.12	4382.61	4310.74	4580.78	-0.532159	0.0621782	0	1	1	4580.78	-0.457124	0.0617729	0	1	1
ENSMUSG00000005232.11	40	31	50	27.0001	18	28	21	25	17	16	12	16	8	10	4	13	22.5751	-0.852166	0.335197	0	1	1	22.5751	-0.862422	0.410978	0	1	1
ENSMUSG00000005233.16	5654	6020	5493	4924	5672	5647	5481	5244	5197	5867	5454	4994	4021	5082	4460	3737	5194.57	-0.106535	0.0414572	0	1	1	5194.57	-0.451856	0.0418098	0	1	1
ENSMUSG00000005237.14	273	329	310	301	508	475	509	437	521	666	510	563	556	795	648	576.999	481.649	0.227108	0.118381	0	1	1	481.649	-0.179827	0.113874	0	1	1
ENSMUSG00000005251.15	998	1104	737	630	1346	1387	1312	1278	1097	1213	974	913	1239	1642	1350	1456	1154.98	0.535754	0.110127	0	1	1	1154.98	0.312399	0.109524	0	1	1
ENSMUSG00000005262.13	4299.96	4554.19	4070.96	3824.09	4120.11	4206.39	3966.36	3730.82	3749.93	4615.74	4246.13	3899.68	3528.8	4536.03	3968.54	3807.56	4065.45	-0.151264	0.0427755	0	1	1	4065.45	-0.130791	0.0428263	0	1	1
ENSMUSG00000005267.13	260.259	275.401	242.509	175.809	641.5	720.649	528.608	462.88	345.88	441.563	395.468	320.828	1028.68	1416.54	1107.86	1069.51	563.531	1.13272	0.116537	1.13889	0.25475	1	563.531	1.39382	0.111079	3.54546	0.000391935	0.0134796
ENSMUSG00000005268.20	55.529	67.6644	97.3975	85.5642	60.5489	80.3297	113.79	116.455	34.078	40.0854	22.1145	31.6993	25.3441	46.7969	45.2522	57.594	60.419	-0.110123	0.323503	0	1	1	60.419	0.294942	0.347123	0	1	1
ENSMUSG00000005299.6	6226.82	6951.86	6868.79	6191.14	5761.18	5822.87	6285.92	5646.06	6670.2	7827.59	7936.07	7360.33	5450.55	7712.55	6615.64	6171.35	6593	-0.236616	0.0550265	0	1	1	6593	-0.242914	0.0548704	0	1	1
ENSMUSG00000005312.15	33823	37240	29295	25620	20605	21654	21655	19918	28284	30507	29988	28673	18575	24043	21769	19587	25805.9	-0.670199	0.0536988	0	1	1	25805.9	-0.596731	0.0537106	0	1	1
ENSMUSG00000005320.9	276	309	225	217	202	244	203	158	278	328	244	251	97	149	130	105	216.112	-0.405877	0.144947	0	1	1	216.112	-1.34382	0.150522	-2.28419	0.0223603	0.420466
ENSMUSG00000005338.13	69	87.0069	102	89.9999	74.9999	89	104	102	83	97	123	85.9999	50	64	57	47	85.3409	-0.184817	0.238268	0	1	1	85.3409	-1.08182	0.245293	-0.333546	0.738722	1
ENSMUSG00000005354.16	10383.6	11851.7	11964.5	11294	8487.05	8190.8	8297.8	7870.96	7017.25	7508.06	8144.24	7413.71	4880.05	6016.37	5968.6	5081.63	8236.66	-0.579293	0.0667606	0	1	1	8236.66	-0.607689	0.067177	0	1	1
ENSMUSG00000005355.9	88	114	82	55	47	57	57	49	8	18	13	16	15	13	18	3	40.8996	-0.77451	0.258467	0	1	1	40.8996	-0.344776	0.362639	0	1	1
ENSMUSG00000005357.9	21.0001	21	36	35	40	43	28	52	36	32.9999	32	36	63	89	66	75	43.2402	0.365053	0.268592	0	1	1	43.2402	0.780508	0.251741	0	1	1
ENSMUSG00000005360.14	845.179	972.197	1008.3	929.449	1946.09	2192.05	1833.39	1773.89	2241.95	2344.15	2263.9	2124.34	2801.67	4054.23	3270.15	2927.37	1943.17	0.314018	0.0747982	0	1	1	1943.17	0.131531	0.0718768	0	1	1
ENSMUSG00000005362.14	3621.44	3712.84	3469.51	3190.91	4695.95	4630.88	4747.98	4430.24	3564.82	4358.24	4089.04	3727.2	5395.52	7358	6130.44	5899.18	4514.47	0.317961	0.0307641	0	1	1	4514.47	0.52643	0.0300368	0	1	1
ENSMUSG00000005364.11	39.24	32.9927	27.6657	16.2577	12.5123	18.3499	21.9192	20.5365	8.13739	12.7293	9.33133	10.1532	11.1777	22.8662	19.0911	13.1009	18.3621	-0.756477	0.323227	0	1	1	18.3621	0.546819	0.3772	0	1	1
ENSMUSG00000005370.4	74252.6	76175.5	70752.1	64537.9	68592.5	73038	70803.5	67554.4	87892.2	98669.8	97875.4	90170.5	85758.7	116201	95324.1	90323.2	82630	-0.126916	0.0245735	0	1	1	82630	-0.0818881	0.0244971	0	1	1
ENSMUSG00000005371.15	6143	6311	5089	4241	5254.01	5546	4817	4840.01	6204	7652	7051	5930	6943	11036	8022	8572	6411.27	-0.178745	0.0786877	0	1	1	6411.27	0.242373	0.0783099	0	1	1
ENSMUSG00000005373.13	549.556	571.313	613.14	525.654	752.46	763.66	748.883	707.462	230.178	216.856	219.074	204.096	339.753	418.016	373.803	358.845	470.209	0.0493442	0.119292	0	1	1	470.209	0.529791	0.128059	0	1	1
ENSMUSG00000005374.13	4893.91	5076.76	4318.51	3868.67	6894.02	7056.1	6824.21	6073.21	5603.69	6439.82	5315.19	4722.12	6351.41	8159.23	6798.7	5934.13	5856.22	0.47602	0.0710576	0	1	1	5856.22	0.324984	0.0709086	0	1	1
ENSMUSG00000005378.17	5717.2	6336.47	7056.18	6204.43	5681.1	5618.06	6190.26	5283.24	5216.85	5581.49	5665.03	5320.67	4147.71	5512.34	4921.14	4552.68	5567.93	-0.188383	0.0512208	0	1	1	5567.93	-0.16382	0.0515304	0	1	1
ENSMUSG00000005397.8	15539.9	15656	17642	15775	30742.5	32207.6	30982.8	27724.8	23345.8	30590.5	30845.8	26544	43383	55509.6	48805.7	43991.7	30109.4	0.816885	0.0685525	0	1	1	30109.4	0.670589	0.0684095	0	1	1
ENSMUSG00000005410.6	64829.4	70103.4	64227.5	58303.1	56269.2	56012.1	55698.9	51748.1	64193.3	70153.2	68262.1	65147.5	55131	70251	67150.1	59249.1	62324.5	-0.327187	0.032628	0	1	1	62324.5	-0.204922	0.0326055	0	1	1
ENSMUSG00000005413.8	18911	20356	19233	18679	5586	6134	5591	5953	12449	13681	13123	12469	7798	14140	10040	11705	12366.2	-1.83565	0.0876246	-9.53676	1.4737e-21	1.07311e-18	12366.2	-0.374463	0.0874671	0	1	1
ENSMUSG00000005417.17	15833.2	16541.9	14982.6	13489.9	17147.3	17396.2	17432	16254.2	16398.4	18784.2	18468.6	16722.7	17859.5	23637.6	20825.3	19308.8	17478.8	0.0903436	0.0306622	0	1	1	17478.8	0.144878	0.0305081	0	1	1
ENSMUSG00000005442.13	17939	19236	18681	16260	25828	26320	25610	23204	16732	19839	20121	18362	22074	28843	25718	23771	21654	0.357417	0.0423722	0	1	1	21654	0.324741	0.0423628	0	1	1
ENSMUSG00000005447.12	2172	2440	2726	2437	3364	3329	3567	3308	2854	2952	2844	2756	2522	3161	3042	2582	2874.72	0.382737	0.0725909	0	1	1	2874.72	-0.163425	0.0726039	0	1	1
ENSMUSG00000005465.9	98	87	66	60.0001	195	164	205	158	156	192	126	104	273	423	275	311	175.763	1.08598	0.182254	0.471777	0.637086	1	175.763	0.993123	0.169677	0	1	1
ENSMUSG00000005469.10	7677	8420	7189	6370	6565	6737	6508	6136	8596	9897	9251	8539	5495	6905	5979	5054	7230.75	-0.286192	0.0447228	0	1	1	7230.75	-0.759109	0.0446817	0	1	1
ENSMUSG00000005470.8	3291	3439	3187	2869	3334	3125	3136	3005	3750	4302	3869	3504	2536	3404	2992	2625	3285.34	-0.181776	0.0711827	0	1	1	3285.34	-0.560602	0.0711008	0	1	1
ENSMUSG00000005474.9	8	2	0	5	0	0	6	3	0	0	0	0	0	0	0	0	1.56081	-0.983517	2.00802	0	1	NA	1.56081	0	2.39458	0	1	NA
ENSMUSG00000005481.18	32017.3	35216.3	35647.2	32894.2	25696.5	24999.1	27871.9	26083.2	24283.8	26395.2	28029.4	26350.5	16591.2	19992.6	19624.1	16297.8	26381	-0.478076	0.0650102	0	1	1	26381	-0.676764	0.0651143	0	1	1
ENSMUSG00000005483.10	6268.79	6552.92	4679.82	4189.83	5595.7	5894	5308.7	4971.53	4958.87	5598.89	5119.74	4825.87	4971.84	6777.76	5903.99	5298.01	5405.32	-0.081541	0.0810576	0	1	1	5405.32	0.0323552	0.0810625	0	1	1
ENSMUSG00000005493.15	244.262	231.138	194.189	152.026	347.822	351.387	325.721	314.911	150.136	137.362	179.6	143.935	307.322	377.452	366.718	366.348	257.637	0.664673	0.112583	0	1	1	257.637	1.01775	0.115971	0.153072	0.878342	1
ENSMUSG00000005501.14	1317.6	1374.16	1333.28	1133.25	1403.66	1409.26	1487.35	1302.12	3007.45	3463.2	3662.48	3181.11	2852.57	4171.26	3454.32	3308	2327.26	0.0316809	0.0501576	0	1	1	2327.26	-0.0785631	0.0452605	0	1	1
ENSMUSG00000005503.8	188	241	524	484	375	391	471	419	41	38	120	109	127	111	98	83	243.661	0.0805369	0.423232	0	1	1	243.661	0.331844	0.43377	0	1	1
ENSMUSG00000005505.12	1071.54	1141.53	1131.51	1046.53	986.038	1034.05	1001.03	898.533	1121.51	1317.52	1358.54	1261.02	1005.52	1275.01	1052.04	986.523	1104.78	-0.279263	0.0588684	0	1	1	1104.78	-0.255826	0.0579512	0	1	1
ENSMUSG00000005506.16	15384.5	15806.9	13364.6	11692.1	10943.7	11567.1	11629.6	11050.2	13794	16176.1	15345.4	14139.7	11015.1	14253.5	12471.3	11547.5	13117.7	-0.359225	0.047239	0	1	1	13117.7	-0.313446	0.0471803	0	1	1
ENSMUSG00000005510.9	3020	3170.96	3180.46	2929.5	3373.5	3193.46	3227.5	2958	3503.5	3785.45	3683.5	3553	2850.5	3763.5	3448.47	3035.5	3287.96	-0.00775802	0.0453954	0	1	1	3287.96	-0.224004	0.045075	0	1	1
ENSMUSG00000005514.14	5482	6105	6585	5986	7109	6986	6793	6528	8021	8694	8004	7674	6378	8447	7258	6594	7021.66	0.0717253	0.063255	0	1	1	7021.66	-0.275433	0.063062	0	1	1
ENSMUSG00000005533.10	1867.18	1772	1803.65	1467.31	4946.5	5392.71	4311.12	4002	3933.11	4730.9	4486.5	4077.93	8679.33	12036.2	8887.07	9138.86	5071.21	1.47701	0.111202	4.28956	1.79026e-05	0.00149427	5071.21	1.34399	0.110128	3.12354	0.00178692	0.0507866
ENSMUSG00000005534.10	458.072	420.888	348.92	287.061	853.246	959.037	933.078	935.441	1091.5	1272.98	1052.49	984.577	1838.94	2598.91	2015.3	2084.57	1101.3	1.29837	0.0996005	2.99571	0.00273808	0.124881	1101.3	0.91829	0.0932094	0	1	1
ENSMUSG00000005540.10	41.2052	47.2885	24.1285	28.0308	31.7422	46.1642	43.0473	36.3342	23.0533	15.0795	24.0352	34.0426	72.1077	76.0644	51.3939	58.0369	40.1588	0.0753035	0.277039	0	1	1	40.1588	1.29783	0.279598	1.06519	0.286788	1
ENSMUSG00000005547.14	2	2.37336	9.3522	7.85637	1.27747	1	2	0	0	0	0	3	0	0	0	0	2.28591	-2.81631	1.52219	-1.19322	0.232782	NA	2.28591	-2.45547	1.836	-0.792742	0.427928	NA
ENSMUSG00000005553.14	102	124	71	65	84	115	105	96	104	153	131	130	77	105	90	83	103.311	0.200563	0.215521	0	1	1	103.311	-0.633904	0.213053	0	1	1
ENSMUSG00000005566.14	369579	401113	399023	363165	346869	342629	347874	327922	235588	249223	265510	253328	211856	255486	253083	209704	301749	-0.174959	0.0473242	0	1	1	301749	-0.0646821	0.0473395	0	1	1
ENSMUSG00000005575.16	10735	12032	11409	10154	11461	11756	11662	10749	8486	9772	10060	9076	9390	12735	11834	10075	10694.3	0.0136468	0.0355066	0	1	1	10694.3	0.179418	0.0356586	0	1	1
ENSMUSG00000005580.11	332	342	361.001	287	433	390.999	437.999	479	244	321	305	298.999	388	576	425	434	375.147	0.304568	0.0974372	0	1	1	375.147	0.511189	0.098302	0	1	1
ENSMUSG00000005583.16	13	10	30	23	22	13	16	22	12	11	11	20	7.99999	19	12	13	16.6246	-0.726717	0.461916	0	1	1	16.6246	-0.762267	0.486411	0	1	1
ENSMUSG00000005609.16	9894.78	10807.1	10724.8	9653.78	12300.1	13266.6	12895.1	12051.6	10133.4	11538.6	11208.8	10218.6	9178.12	11956.8	10141.3	9283.03	10933.2	0.198979	0.0364624	0	1	1	10933.2	-0.192162	0.0365754	0	1	1
ENSMUSG00000005610.17	179642	191285	183088	162627	155692	162267	157179	150931	169166	198731	195376	182283	128171	165448	144775	131628	166723	-0.319801	0.0377487	0	1	1	166723	-0.51427	0.037752	0	1	1
ENSMUSG00000005611.15	27	21	25	34	23	32	19	31	10	4	4	6	11	3	6	7	16.3823	-0.10799	0.397048	0	1	1	16.3823	-0.128971	0.53125	0	1	1
ENSMUSG00000005615.15	4002.41	4171.26	3563.08	3254.1	3814.54	3847.25	3600.04	3495.52	3563.28	4402.72	4529.86	3969.34	2633.14	3646.41	3002.7	2546.15	3654.49	-0.249316	0.0663411	0	1	1	3654.49	-0.671421	0.066521	0	1	1
ENSMUSG00000005621.11	3113	3539	3019	2610	3467	3674	3563	3503.99	3760	4607	4292	3767	4777.99	6617	5022	4857	3960.78	0.038185	0.0768595	0	1	1	3960.78	0.225546	0.076272	0	1	1
ENSMUSG00000005625.15	20861	23255	22494	20983	18322	18502	18372	17114	22217	24074	23037	21625	16370	21384	19309	16934	20372.8	-0.385025	0.0413967	0	1	1	20372.8	-0.432143	0.0413816	0	1	1
ENSMUSG00000005628.12	16	20	21	14	14	21	12	8	36	31	24	38	20	25	29	20	22.5634	-0.45673	0.447333	0	1	1	22.5634	-0.427453	0.413672	0	1	1
ENSMUSG00000005640.11	19.0325	25.0793	24.0124	13.0127	38.1206	39.0328	32.0102	29.0423	29.0573	45.089	26	16.0284	50.0143	81.2928	39.0309	67.0408	34.3156	0.732695	0.311105	0	1	1	34.3156	0.703306	0.28834	0	1	1
ENSMUSG00000005649.17	7.00221	4.00228	0	4.0003	4.00105	3.00077	5.00145	3.0006	1.00646	7.00107	1.00042	5.00184	4.00162	2.00105	3.00007	1.00023	3.71857	-0.429507	0.932478	0	1	1	3.71857	-0.0850719	0.972753	0	1	1
ENSMUSG00000005656.9	5166.9	5260.01	4882.59	4184.03	4610.61	4618.48	4245.27	4049.9	5144.14	5680.98	5405.64	5130.4	4736.04	6378.32	5431.42	5276.12	4995.59	-0.208412	0.0465954	0	1	1	4995.59	-0.217725	0.0462525	0	1	1
ENSMUSG00000005667.8	12941	14157	11632	9714	2000	1960	1983	1817	11105	13758	13665	11670	5909	9637	6871	7790	8526.43	-2.67602	0.0785222	-21.3446	4.38015e-101	9.24955e-97	8526.43	-0.826928	0.0772364	0	1	1
ENSMUSG00000005672.12	5703	5897.99	6604.99	6199	9862	10854	9636	9063	17786	22932	21021	18554.9	28531	40351	32070	31295	16967.3	0.612825	0.0678224	0	1	1	16967.3	0.623572	0.0671098	0	1	1
ENSMUSG00000005674.9	3093	3314.56	3292.55	3073.61	2517.33	2327.32	2423.35	2137.85	3554.44	4060.98	3884.33	3549.17	2376.06	3091.67	2780.13	2550.8	3042.17	-0.593286	0.0800032	0	1	1	3042.17	-0.71937	0.0796771	0	1	1
ENSMUSG00000005677.14	18.9948	13.4399	10.4483	11.3887	10.665	12.6808	15.6547	13.1566	18.5624	16.0212	11.6676	11.8284	15.936	30.3275	25.8772	21.1967	15.958	-0.198622	0.37694	0	1	1	15.958	0.520381	0.348252	0	1	1
ENSMUSG00000005681.12	10	14	23	12	12	9	8	8	24	16	13	19	7	2	4	0	11.5263	-0.78367	0.483781	0	1	1	11.5263	-2.51624	0.574878	-2.63749	0.00835216	0.190057
ENSMUSG00000005682.9	7712.6	7886.09	6871.1	6213.89	8276.68	8375.87	8197.42	7711.93	7316.93	8200.45	7950.09	7461.42	7617.96	9528.38	8514.49	7699.02	7817.44	0.0892896	0.0355385	0	1	1	7817.44	-0.0282414	0.0354459	0	1	1
ENSMUSG00000005683.8	24877.1	25994.1	25828.9	23877.2	18779.5	18517.2	18368.8	17291.7	37851	44546.1	42530.9	38107.3	19341.4	27306.4	22774.6	21829.1	26869.2	-0.561429	0.0376394	0	1	1	26869.2	-0.96756	0.0374613	0	1	1
ENSMUSG00000005686.17	888.618	779.952	455.924	428.94	808	826.979	789.724	687.732	2661.64	3080.78	2757.58	2525.81	2685.37	3658.42	3023.04	3054.45	1768.41	0.196572	0.158663	0	1	1	1768.41	-0.0133035	0.155045	0	1	1
ENSMUSG00000005687.14	12748.9	14064.6	13890.5	11912.9	11083.1	11133.8	11110.5	10196.8	12066.6	13488.7	13644.1	12109.3	9360.54	12379.3	11253.1	10320.3	11998.2	-0.450316	0.0341215	0	1	1	11998.2	-0.461512	0.0341457	0	1	1
ENSMUSG00000005696.11	7.77024	10.2743	10.1185	3.0638	2.14617	3.68443	0	3.69472	10.7634	0	6.02262	3.45583	1	3.99007	12.1409	9.43265	5.50957	-2.03511	0.89559	-1.15579	0.247768	1	5.50957	0.250218	0.841661	0	1	1
ENSMUSG00000005698.15	19415	22194	21457	19149	18257.6	19526	19643.5	18658.9	18831	22368.9	23056.7	20817	17644	22433	19876	17383.8	20032	-0.19646	0.0506085	0	1	1	20032	-0.19496	0.0505984	0	1	1
ENSMUSG00000005699.16	611	611	579.999	584	800	727.999	718	646	674	826.999	717	694	752.001	899.999	837.999	766	711.715	0.124985	0.082836	0	1	1	711.715	-0.0134316	0.0814052	0	1	1
ENSMUSG00000005705.10	22	14	17	15	24.3214	32	16.4345	18	9	14.1254	7.23469	4	9	8	11.0529	11.1853	14.4983	0.265977	0.370671	0	1	1	14.4983	0.0713408	0.445685	0	1	1
ENSMUSG00000005718.8	2902.07	3445.05	3772.01	3392.19	4301.98	4319	5016.11	4628	1895	2200.12	2587	2636	2773.98	3504.99	3192.01	2799.77	3317.78	0.340878	0.098801	0	1	1	3317.78	0.272978	0.0994418	0	1	1
ENSMUSG00000005732.14	21141.6	24998.6	23621	20725	15037.8	15562.5	16397.1	14655.1	19652.4	20745.7	21001	19824	10649.7	13011.2	12706.2	10420.7	17688.7	-0.655266	0.0522948	0	1	1	17688.7	-0.931614	0.0524252	0	1	1
ENSMUSG00000005763.15	33.0242	15.7957	10.1842	5.93351	20.6885	14.3261	12.7756	1.0198	18.8012	6.01452	32.9193	17.222	13.4638	10.4071	14.4237	5.07176	13.9254	-0.709113	0.624828	0	1	1	13.9254	-0.571885	0.619137	0	1	1
ENSMUSG00000005774.12	830	903.999	748	681	463	484	454	524	1161	1250	1341	1253	744	922	825	907	842.249	-0.757224	0.122239	0	1	1	842.249	-0.504951	0.119323	0	1	1
ENSMUSG00000005779.12	25720	27182	24827	22804	18606	17676	17906	16431	24802	26105	25552	24232	16313	20715	18776	16563	21663.5	-0.638066	0.0357144	0	1	1	21663.5	-0.608978	0.0357066	0	1	1
ENSMUSG00000005802.12	262.505	287.745	195.983	189	376.497	417.302	330.5	359.157	171	201	181	157.5	347.5	526.491	368.003	387.998	290.572	0.550816	0.11481	0	1	1	290.572	0.967329	0.117344	0	1	1
ENSMUSG00000005803.14	16.0271	15.3924	15.0189	10.043	4.00852	13.6605	26.0536	23.0099	9.02824	16.0064	11.0148	16	20.605	13.0218	8	17.0137	14.485	0.159726	0.461543	0	1	1	14.485	0.102277	0.466502	0	1	1
ENSMUSG00000005804.14	2115.33	2275.84	2011.89	1730.32	2743.99	2699.09	2644.94	2336.04	2367.54	2611.6	2618.31	2513.37	2773.37	3815.21	3349.14	3005.61	2577.64	0.220362	0.0718395	0	1	1	2577.64	0.215796	0.0712171	0	1	1
ENSMUSG00000005813.12	9224	10169	10281	9075	7897	7990	8406	8045	8976	10227	10379	9404	6855	8600	7632	7133	8783.69	-0.338542	0.0376698	0	1	1	8783.69	-0.430989	0.0377323	0	1	1
ENSMUSG00000005823.9	1464	1583	1679	1324	2381	2332.99	2264	1943	1067	1373	1242	1083	2136	3005	2627	2441.01	1840.57	0.440721	0.0603282	0	1	1	1840.57	0.938821	0.0608738	0	1	1
ENSMUSG00000005836.10	528	646	345	392	364	564	292	318	142	102	85	132	93	149	108	104	282.039	-0.351424	0.181381	0	1	1	282.039	-0.29645	0.198959	0	1	1
ENSMUSG00000005846.12	36901	40561	39381	36002	25498	25390	25643	24388	37000	41040	42667	39803	21202	28021	25626	23511	32410.7	-0.719409	0.0450671	0	1	1	32410.7	-0.884036	0.0450681	0	1	1
ENSMUSG00000005871.15	13849.7	13662.2	11695.8	10225.7	13457.8	14828.7	14441.5	13503.5	11642.3	15169.4	14164.9	12695.3	13952.8	19405	14801	13844.1	13772.9	0.141559	0.0718441	0	1	1	13772.9	0.179535	0.0717995	0	1	1
ENSMUSG00000005873.6	920	958	1002	832	1056	1117	1065	1024	1977	2133	1758	1566	1213	1967	1423	1436.01	1347.78	-0.0236933	0.146093	0	1	1	1347.78	-0.481628	0.144659	0	1	1
ENSMUSG00000005881.13	4613	5080	5579	4859	6093	6017	6030	5415	5554	6103	5871	5310	5797	8436	7026	6719	5867.48	0.132704	0.0583805	0	1	1	5867.48	0.130122	0.0581645	0	1	1
ENSMUSG00000005882.18	2735.43	2992.3	3067.98	2813.12	2689.91	2541.21	2628.06	2463.32	2455.03	2638.62	2731.66	2597.34	2180	2839.78	2485.22	2373.85	2657.27	-0.379378	0.0568541	0	1	1	2657.27	-0.209952	0.057127	0	1	1
ENSMUSG00000005883.15	4	0	1	1	1.02099	1	2	1	1	1	1	0	1	2	2	0	1.41564	-0.836284	1.2714	0	1	NA	1.41564	-1.02713	1.34733	-0.0201377	0.983934	NA
ENSMUSG00000005886.14	3352.49	3345.44	3479.21	3021.44	4722.36	5048.16	5088.38	4774.26	3828.94	4726.66	4696.02	4323.74	5621.32	8170.05	5843.14	5874.23	4700.01	0.476386	0.0677493	0	1	1	4700.01	0.473827	0.0672866	0	1	1
ENSMUSG00000005892.4	21230	23523	16797	14866	17094	15035	21853	18380	13632	15851	16680	16252	11554	14283	15543	12815	16612.3	-0.165512	0.115349	0	1	1	16612.3	-0.3333	0.115418	0	1	1
ENSMUSG00000005893.14	2823.66	2720.03	1939.04	1565.56	3519.21	4094.2	3948.91	3715.66	1261.95	1653.15	1417.38	1187.88	2132.05	3016.05	2395.92	2344.61	2437.7	0.501589	0.111338	0	1	1	2437.7	0.476071	0.112328	0	1	1
ENSMUSG00000005897.14	1171	1215	1487.06	1355.02	2551.03	2575	2544	2687.06	1074	1274.02	1275	1209.01	1760	2389.06	1973	1988.07	1760.72	0.846333	0.0805775	0	1	1	1760.72	0.627052	0.0811533	0	1	1
ENSMUSG00000005899.14	22922.5	23875.4	21401.2	19117	19154.8	18988.3	18772.9	17443.9	14193.9	16313.2	16617.8	15209.8	11856.8	14235.1	13514.2	11602.8	17287.4	-0.30981	0.0509387	0	1	1	17287.4	-0.367521	0.0511586	0	1	1
ENSMUSG00000005907.14	2588.6	2786.79	2550.53	2337.96	2966.75	3002.46	2943.1	2847.12	2626.82	3031.27	2976.46	2819.09	2548.19	3486.13	3043.79	2903.74	2844.66	0.1971	0.0730062	0	1	1	2844.66	0.277753	0.0728489	0	1	1
ENSMUSG00000005917.15	37.6552	37.1331	45.2759	41.0148	97.8436	115.756	81.9716	78.6834	29	32.6948	40.2524	41.7045	34	68	51.8276	25.006	52.8616	1.16158	0.231849	0.696897	0.485867	1	52.8616	0.287126	0.248399	0	1	1
ENSMUSG00000005936.19	9842.58	10306.4	9044.67	8218.23	8833.63	9057.03	9139.26	8688.63	9934.25	11257.5	10527.5	9706.05	8030.84	10848.8	8918.64	8481.99	9399.84	-0.0885219	0.0359499	0	1	1	9399.84	-0.19724	0.0358687	0	1	1
ENSMUSG00000005947.11	185	177	157	154	106	116	91	105	193	238	205	219	113	143	130	123	154.486	-0.780216	0.119846	0	1	1	154.486	-0.873445	0.113262	0	1	1
ENSMUSG00000005949.9	1001.73	1028	816.084	733.103	1579.82	1720.95	1592	1441.21	1017.01	1143.66	1008	862	1716.79	2308.44	2025.14	1962	1359.77	0.735072	0.0884844	0	1	1	1359.77	0.969618	0.0877241	0	1	1
ENSMUSG00000005950.14	121	104	91	99	198	195	170	152	180	163	166	143	177	209	184	149	155.214	0.61422	0.149049	0	1	1	155.214	0.0795093	0.142798	0	1	1
ENSMUSG00000005951.13	202	213	150	146	323	318	197	238	122	174	140	145	266	357	296	251	217.866	0.506024	0.151368	0	1	1	217.866	0.880968	0.153044	0	1	1
ENSMUSG00000005952.15	1	3	7	2	1	4	4	6	0	0	0	0	2	1	4	0	2.46176	0.21645	1.12506	0	1	NA	2.46176	3.52697	1.51281	1.67037	0.0948454	NA
ENSMUSG00000005958.15	1810.86	1886.31	2019	1923.35	3702.78	3565.91	3822.59	3466.59	4454.07	5047.42	4584.83	4283.42	4630.43	6458.36	5299.63	5299.29	3850.94	0.823387	0.0644297	0	1	1	3850.94	0.119855	0.0628204	0	1	1
ENSMUSG00000005968.14	167.836	164	182.918	204	649.798	680.666	565.817	604.676	405.654	425.236	441.744	468.732	695.312	1067.04	830.552	927.777	518.601	1.65993	0.113072	5.83636	5.33538e-09	7.99058e-07	518.601	0.859593	0.104204	0	1	1
ENSMUSG00000005973.6	5100	5457.01	6244	5659	10077	10312	8659	8177	12748	16412	16886	13729	11248	15640	13297	12971	10701.1	0.627309	0.0874694	0	1	1	10701.1	-0.29642	0.0870457	0	1	1
ENSMUSG00000005980.15	474.016	529	537.001	433	1052	1069	1030	836	479	574	698	575	1342	1571	1373	1212	842.749	0.883697	0.107492	0	1	1	842.749	1.12262	0.106081	1.15593	0.247711	1
ENSMUSG00000005981.11	24981	26049	23959	21525	26938	25922	26580	24315	20112	21478	20510	19070	18250	22968	21736	18879	22704.1	0.00378793	0.0376743	0	1	1	22704.1	-0.117948	0.0378016	0	1	1
ENSMUSG00000005982.13	2983.05	3112.6	3067.71	2710.77	3033.79	2955.42	2978.38	2850.61	3310.3	4008.67	3929.44	3499.89	2623.5	3746.46	3131.74	2867.95	3170.56	-0.170091	0.0411011	0	1	1	3170.56	-0.349492	0.0406089	0	1	1
ENSMUSG00000005983.15	126.541	168.927	136.183	108.472	115.573	115.458	99.0869	71.949	65.1527	90.9955	103.281	84.864	67.17	93.8843	81.7239	82.7216	103.369	-0.630921	0.218322	0	1	1	103.369	-0.00101709	0.22585	0	1	1
ENSMUSG00000005986.16	275	300	267	256	362	350	340	372	505	580	516	478	595	772	710	707	455.733	0.291024	0.0836429	0	1	1	455.733	0.328259	0.0734226	0	1	1
ENSMUSG00000005994.14	9	7	4	6	6	4	4	5	1	1	0	0	0	2	3	0	3.98709	0.547831	0.775682	0	1	1	3.98709	1.50649	1.33056	0.38066	0.703455	1
ENSMUSG00000006005.18	45796.4	46169.5	39353.1	33862.9	39413.9	41895.1	40200.8	37008.8	66622.8	79189.3	75041.9	66623.5	60229.7	84361.4	65912.8	62043.4	54697.5	-0.100362	0.0529531	0	1	1	54697.5	-0.190799	0.0528509	0	1	1
ENSMUSG00000006007.14	2	4	2	8	0	6	2	5	0	4	2	4.99999	6	9	4	2.99999	4.2755	0.140364	0.980038	0	1	1	4.2755	1.20386	0.987578	0.206419	0.836463	1
ENSMUSG00000006010.14	2042.92	2155.37	1953.06	1636.65	2231.51	2323.05	2343.42	2098.47	2227.26	2578.37	2555.68	2394.33	2916.56	3705.88	3278.77	3108.9	2456.04	0.108463	0.0808821	0	1	1	2456.04	0.414001	0.0801187	0	1	1
ENSMUSG00000006014.16	46.6265	67.0413	65.8483	41.5351	70.6633	103.879	63.7844	66.7605	53.9557	77.3639	86.3886	63.1309	52.7255	67.7656	48.4155	56.6292	64.8846	0.211043	0.247995	0	1	1	64.8846	-0.476947	0.249366	0	1	1
ENSMUSG00000006019.15	1491	1561	1670	1519	2535	2557	2510	2280	1719	1936	1791	1576	2715	4021	3379	3111	2247.39	0.59829	0.0876462	0	1	1	2247.39	0.776496	0.087143	0	1	1
ENSMUSG00000006021.5	848	958	1071	886	1117	1064	1184	1126	860	1042	1158	969	842	1117	996	989	1011.24	0.167973	0.0787164	0	1	1	1011.24	-0.030665	0.0789181	0	1	1
ENSMUSG00000006024.13	10939	11520	10784	9791	13133	12203	12323.1	11209	7055	8010	7894.99	7069	8439	11502	10172	9445	10046.5	0.0846983	0.0469111	0	1	1	10046.5	0.455369	0.0472472	0	1	1
ENSMUSG00000006050.12	4187	4651	4616	3997	3482	3532	3446	3233	3092	3734	3552	3301	2788	3669.99	3157	2845	3594.26	-0.456212	0.0373634	0	1	1	3594.26	-0.282877	0.0380193	0	1	1
ENSMUSG00000006056.13	7528.86	7987.85	13118.9	12164.9	2174.87	2294.83	2616.87	2873.89	1370.82	1488.68	1497.92	1503.9	766.764	1107.93	825.967	685.806	3907.78	-2.13467	0.19235	-5.89899	3.65728e-09	5.67873e-07	3907.78	-0.929907	0.194223	0	1	1
ENSMUSG00000006057.15	24371.7	26877.8	26293.3	24163.8	16647.3	15547.5	15541.4	14226.3	26086.4	28697.8	29091.3	26796.2	13112	16519.3	15303.3	12607.2	21185.5	-0.887929	0.0507805	0	1	1	21185.5	-1.18249	0.050793	-3.59273	0.000327228	0.0114785
ENSMUSG00000006058.10	5416.29	5992.1	6100.12	5345.45	3621.32	3592.9	3668.82	3300.16	4771.4	5120.57	5182.98	4840.18	2850.98	3825.4	3327.9	2971.9	4465.05	-0.930866	0.050437	0	1	1	4465.05	-0.802463	0.0507218	0	1	1
ENSMUSG00000006095.12	7090.9	8052.29	7608.36	6853.59	5555.27	5621.51	5787	5082.1	7981.99	8708.98	8620.55	8103.4	4848.11	6394.66	5648.24	4709.67	6693.19	-0.468599	0.0442342	0	1	1	6693.19	-0.763632	0.0441763	0	1	1
ENSMUSG00000006127.9	1377.99	1438	1555	1399	3687	3638	3543	3451	1562	1853	1760	1643	2744	3889	3373	3207	2482.31	1.244	0.0663941	3.67501	0.000237841	0.0145579	2482.31	0.8816	0.0660821	0	1	1
ENSMUSG00000006134.4	12454	13114	10870	9505	11600	12410	11524	10837	9467	11041	10066	9448	10229	13583	11304	10408	11077.8	-0.0680038	0.0463467	0	1	1	11077.8	0.0770901	0.0464302	0	1	1
ENSMUSG00000006143.12	68	86	87	78.9999	27	19	29	26.0001	9	9	8.99999	13	5	0	0	0	30.3614	-1.82902	0.27232	-3.04428	0.00233236	0.10945	30.3614	-2.96407	0.713725	-2.75186	0.00592583	0.144166
ENSMUSG00000006154.13	14	17	32	18	25	29	30	28	16	15	29	14	30	60	29	40	27.152	-0.150881	0.369473	0	1	1	27.152	1.11227	0.364975	0.307607	0.758382	1
ENSMUSG00000006169.19	10129	11275	10297	8946.99	8829	9243.01	9598	9073	11303	12537	12180	11170	8065	10503	9228	8152.01	10053.8	-0.24126	0.0348382	0	1	1	10053.8	-0.529604	0.03476	0	1	1
ENSMUSG00000006179.9	146	179	188	185	724.001	643	606	621.001	493.999	656	531	482.999	969	1519	1063	1222	620.192	1.68256	0.124438	5.4852	4.13006e-08	5.5199e-06	620.192	0.975375	0.114493	0	1	1
ENSMUSG00000006191.17	2159.73	2416.43	1858.76	1671.59	1825.59	1882.75	1837.54	1879.87	1920.27	2147.04	2142.4	1973.78	1615.24	2321.04	1951.78	1839.46	1962.11	-0.242841	0.0631425	0	1	1	1962.11	-0.171176	0.0630489	0	1	1
ENSMUSG00000006200.3	111.506	129.837	168.499	168	98.3299	95.5561	110.52	98.1884	16.5	10.1265	13	19.263	14.5	20.5	14.9927	11	70.3399	-0.636455	0.206175	0	1	1	70.3399	-0.0989685	0.323176	0	1	1
ENSMUSG00000006204.6	10	3	4	6.00042	30	48	29	22	9	9	5	10	45	50	45	43	22.2619	2.18575	0.442692	2.67851	0.0073951	0.295203	22.2619	2.38091	0.408892	3.37718	0.000732319	0.0236097
ENSMUSG00000006205.13	1898	2266	2870	2762	3849	4232	3421	3551	5270	6858	8052	6189	7557	11881	8019	8441	5308.7	0.489558	0.13995	0	1	1	5308.7	0.32353	0.139194	0	1	1
ENSMUSG00000006215.12	3099	3665	4493	3910	3589	3631	3892	3502	3219	3420	3519	3450	3036	3806.01	3764	3203	3582.05	-0.155244	0.0958771	0	1	1	3582.05	-0.127177	0.0960106	0	1	1
ENSMUSG00000006216.10	193	209	145	151	155	135	168	133	132	101	128	116	111	129	121	130	147.435	-0.299136	0.196206	0	1	1	147.435	-0.56011	0.201564	0	1	1
ENSMUSG00000006218.4	278	259	482	415	391	439	436	387	1210	1183	947	971	641	756	686	522	627.199	0.0859916	0.180859	0	1	1	627.199	-0.862082	0.176919	0	1	1
ENSMUSG00000006219.12	35078	36390.6	29059	24801.6	34826.1	34099.1	33120.1	30316.6	27359.9	33864.1	37654.8	33571.5	40532.9	51975.3	47689.6	43408	35557.6	0.104268	0.0809281	0	1	1	35557.6	0.371886	0.0808953	0	1	1
ENSMUSG00000006221.7	7.01681	9.03469	6.01983	2.00464	18.0244	18.0099	10.0072	9.00653	21.0831	19.029	17.049	25.083	23.0298	21.0293	24.0378	14.0248	15.0382	1.10908	0.45262	0.240993	0.809561	1	15.0382	-0.127861	0.360673	0	1	1
ENSMUSG00000006235.6	123	131	155	129	117	93	95	100	239	219	177	224	135	199	147	133	154.5	-0.547925	0.151697	0	1	1	154.5	-0.795735	0.14094	0	1	1
ENSMUSG00000006241.16	112	104	104	94	180	135	174	150	87	124	70	85	156	259	192	226	138.324	0.518676	0.157714	0	1	1	138.324	1.05235	0.157613	0.332118	0.7398	1
ENSMUSG00000006262.15	2056.72	2295.23	1771.89	1573.25	1806.72	2028.2	1783.71	1939.29	1418.93	1841.31	1732.67	1645.52	1429.79	1904.58	1497.06	1486.91	1774.76	-0.254831	0.0896895	0	1	1	1774.76	-0.187825	0.0902408	0	1	1
ENSMUSG00000006269.7	3	0	1	2	2	1	1	0	2	4	6	1	4	8	4	2	2.54845	-1.33514	1.17741	-0.284638	0.775922	1	2.54845	0.484425	0.906632	0	1	1
ENSMUSG00000006270.7	6	4	1	2	3	9	3	1	0	1	0	0	0	2	4	0	2.54688	-0.410339	1.11755	0	1	1	2.54688	2.06454	1.54528	0.688898	0.490888	1
ENSMUSG00000006273.14	20399.1	20881.2	19277.2	17583.5	19474.9	19862.3	18978	18381.1	13202.1	14419.7	14791	13783.1	16730.2	22408.1	19924.7	17997.2	17949.7	-0.123565	0.0271746	0	1	1	17949.7	0.342278	0.0273668	0	1	1
ENSMUSG00000006276.10	7902.65	8344.4	7578.23	6782.46	11041.4	11143.3	11008.3	10607.9	6748.58	7667.13	7887.23	6950.13	9116.45	11742.9	10599.5	9524.55	8989.4	0.447324	0.032451	0	1	1	8989.4	0.407721	0.0325554	0	1	1
ENSMUSG00000006281.8	1188	1294	1127	968	2211	2195	1961	1822	2533	3018	2572	2258	2565	3291	2826	2588	2136.87	0.714178	0.0927431	0	1	1	2136.87	0.0825232	0.090965	0	1	1
ENSMUSG00000006288.8	2631.14	2880.85	2853.71	2625.64	3578.99	3556.49	3785.8	3518.43	4623.92	5004.87	4855.8	4587.2	6620.55	8884.07	7581.05	7175.38	4615.66	0.308796	0.0501488	0	1	1	4615.66	0.525962	0.0485793	0	1	1
ENSMUSG00000006289.14	1354.52	1576.91	1719.74	1515.45	1641.88	1536.33	1610.97	1430.57	2773.97	2935.46	2702.27	2483.78	1940.07	2348.81	2184.2	1954.17	2007.64	-0.271785	0.0816642	0	1	1	2007.64	-0.65398	0.0802256	0	1	1
ENSMUSG00000006299.13	14448	15858	15991	14661	19469	18903	19179	17756.9	26243	29011	28243	25784	22772	28892	26778	23944.9	21658.3	0.205884	0.0443454	0	1	1	21658.3	-0.196061	0.0440938	0	1	1
ENSMUSG00000006301.17	1694.76	1631.67	1551.87	1252.98	1230.55	1258	1280.84	1212.71	1758.13	2068.61	1793.37	1604.18	1139.05	1711.28	1245.19	1225.88	1477.95	-0.408294	0.0710772	0	1	1	1477.95	-0.553802	0.0705598	0	1	1
ENSMUSG00000006304.14	14429	15840	14988	13278	10114	10139	10457	9814	19089	21483	21280	19784	13052	17590	15113	14124	15078.9	-0.635037	0.0259869	0	1	1	15078.9	-0.58048	0.0254739	0	1	1
ENSMUSG00000006307.16	21015	21874	20636	17656	28880	30501	31851	29038	17422	21449	21155	18580	29921.8	41832	34246	33471	25860.6	0.449124	0.0434709	0	1	1	25860.6	0.678573	0.0434555	0	1	1
ENSMUSG00000006310.10	1495	1504	1764	1560	2097	2044	2178	2058	1648	1806	1754	1690	1553	2080	1965	1797	1808.7	0.334919	0.0780579	0	1	1	1808.7	0.0433005	0.0781147	0	1	1
ENSMUSG00000006311.8	126	138	174	166	41	48	53	48	87	90	86	88	17	20	19	17	78.589	-1.78043	0.186812	-4.17762	2.94571e-05	0.00228693	78.589	-2.40306	0.234537	-5.98228	2.20041e-09	2.02909e-07
ENSMUSG00000006313.5	527	528	896	823	937	941	981	1012	149	196	185	232	143	193	163	141	508.623	0.363347	0.179069	0	1	1	508.623	-0.388712	0.191858	0	1	1
ENSMUSG00000006315.9	2927	3095	3373	3093	3397	3325	3137	2935	5104	5896	5744	4833	3908	6088	4834	4852	4136.46	-0.0807794	0.0699391	0	1	1	4136.46	-0.271655	0.0690376	0	1	1
ENSMUSG00000006333.14	82901.3	90433.2	88285.8	81709.8	92025.3	87656.8	96971.4	86683.4	74999.9	79199.1	78571.8	74356.8	75425.3	96714	89926.4	78655.6	84554.3	-0.0209995	0.04688	0	1	1	84554.3	0.0153513	0.0468923	0	1	1
ENSMUSG00000006335.16	1654	1900	2096	1890	1837	1786	1883	1689	2095	2279	2112	2024	1860	2422	2065	1966	1971.17	-0.170601	0.0737612	0	1	1	1971.17	-0.131564	0.0733014	0	1	1
ENSMUSG00000006342.15	769.001	881	1227	1197	3046	2955	2643	2627	929	1197	1106	992	2273	3444	2779	2901	1897.8	1.35667	0.137055	2.60235	0.00925877	0.357436	1897.8	1.29773	0.137013	2.173	0.0297801	0.525808
ENSMUSG00000006344.17	60	65	57	39	19	38	27	16	35	26	26	18	8	7	13	9	32.7747	-1.4398	0.359372	-1.22379	0.221032	1	32.7747	-1.69471	0.41858	-1.65969	0.0969772	1
ENSMUSG00000006345.10	406	459	619	573	445	431	375	316	957	1054	1019	932	277	341	343	302	558.718	-0.40842	0.17894	0	1	1	558.718	-1.75569	0.178561	-4.23208	2.31541e-05	0.00105604
ENSMUSG00000006356.10	4374	4690	4503	4242	3777	3614	3921	3625	4755	5060	5072	4690	2571	3557	3182	2804	4053.9	-0.377389	0.0399225	0	1	1	4053.9	-0.825363	0.0402169	0	1	1
ENSMUSG00000006360.11	994	1143	1644	1513	1388	1318	1474	1333	705	638	512	563.001	399.45	500	571	420	956.944	-0.0652187	0.162112	0	1	1	956.944	-0.51385	0.165782	0	1	1
ENSMUSG00000006362.16	66	68.0001	82	62	77	63	54.9999	72	81	86	99	93	53	106	77	74	77.5205	-0.262642	0.236886	0	1	1	77.5205	-0.714292	0.23165	0	1	1
ENSMUSG00000006369.14	5321	5625	4944	4735	4903	4968	4961	4575	4532	4384	4033	4323	4434	5101	4978	3884	4743.22	-0.195969	0.0703161	0	1	1	4743.22	-0.0834664	0.0704991	0	1	1
ENSMUSG00000006373.10	7068	7216	7189	6406	6565	6873	6538	6034	4557	4881	4620	4438	4612	6280	5157	4865	5836.06	-0.199334	0.0347621	0	1	1	5836.06	0.0430162	0.0355904	0	1	1
ENSMUSG00000006378.15	4734.88	4790.15	4490.52	4175.22	5828.71	5355.86	5379.9	5086.45	5988.9	7124.05	6167.38	5537.41	5461.12	7629.42	6440.17	5684.73	5586.5	0.1647	0.0500512	0	1	1	5586.5	-0.110528	0.0496223	0	1	1
ENSMUSG00000006386.15	1686	1571	1333	1154	1946.01	2191	2173	2054	1609	1870	1661	1485	3232	4390	3315	3397.99	2154.68	0.456289	0.0775816	0	1	1	2154.68	0.99091	0.0765963	0	1	1
ENSMUSG00000006389.13	1	5	1	6	3	7	7	5	1	4	4	3	3	1	2	3	3.34099	0.551966	0.735455	0	1	1	3.34099	-0.360706	0.830148	0	1	1
ENSMUSG00000006390.15	742	798	853.004	850.999	758.007	716.009	772	648.999	1051.01	1210	1047	939	730.012	1090.01	829	856	865.092	-0.213148	0.0826697	0	1	1	865.092	-0.36186	0.0810251	0	1	1
ENSMUSG00000006392.16	4390	4948	5069	4611	4280	4338	4382	4053.99	4841	5752	5827.01	5238	3657	5054	4278	4131	4706.08	-0.32022	0.0493044	0	1	1	4706.08	-0.573644	0.0491804	0	1	1
ENSMUSG00000006395.16	134.731	176.213	178.351	160.308	375.803	414.978	365.792	304.498	228	236.893	222.884	228.914	414.999	587.8	493.889	477.903	306.772	1.10559	0.108582	0.972402	0.330851	1	306.772	0.948185	0.10243	0	1	1
ENSMUSG00000006398.15	37012	41118	38275	36110	27969	27185	31666	29016	30729	32569	34632	31902	20594	23956	25335	20839	30808.7	-0.498842	0.0671108	0	1	1	30808.7	-0.639639	0.0671666	0	1	1
ENSMUSG00000006403.13	146.704	183.973	156.068	148.357	184.203	182.688	197.959	167.638	324.947	361.884	345.51	293.648	323.72	441.804	391.345	349.45	260.18	0.135732	0.0996189	0	1	1	260.18	0.101057	0.0822422	0	1	1
ENSMUSG00000006411.12	243.185	237.168	143.149	154.143	69.0002	85.0259	81.045	78.9999	334	282.076	246	310	46	63.0523	95.0002	58.0183	160.824	-1.39812	0.204861	-1.94337	0.051971	1	160.824	-2.2937	0.205927	-6.28232	3.33566e-10	3.50443e-08
ENSMUSG00000006412.10	9975.17	12057.5	10631.1	9249.85	7159.18	7225.67	7633.97	7258.36	12932.2	13401.6	12967.3	12749.2	8676.86	10696.3	9772.99	8557.08	10062.6	-0.512647	0.0452869	0	1	1	10062.6	-0.528323	0.0450047	0	1	1
ENSMUSG00000006418.17	6204	6738	6607	6246.07	9127.01	8903.09	9182.09	8822.08	5836.04	6606.99	6071.13	5656.55	7832.09	10408.1	9056.06	7995.25	7534.44	0.397533	0.0462199	0	1	1	7534.44	0.441482	0.0462994	0	1	1
ENSMUSG00000006423.15	3683.92	3897.01	3699.1	3271.4	4324.78	4422.65	4177.92	4098.19	2545.13	2971.34	2945.16	2709.94	3635.07	4925.42	3878.12	3690.58	3649.44	0.204791	0.0482764	0	1	1	3649.44	0.297613	0.0488024	0	1	1
ENSMUSG00000006435.16	1039.39	993.968	1151.37	1019.95	2397.12	2434.81	2433.63	2295.91	2008.22	2271.51	2158.62	1997.42	2879.36	4270.75	3528.17	3535.76	2209.23	0.994367	0.0674561	0	1	1	2209.23	0.540939	0.0650586	0	1	1
ENSMUSG00000006442.10	34739	39449	38561	35176	23343	22212	27535	24566	22587	23922	24493	23913	13246	15673	16402	13103	25106.3	-0.690464	0.0754983	0	1	1	25106.3	-0.7782	0.0756468	0	1	1
ENSMUSG00000006445.3	19780.1	21249.6	17584	15826.2	34168	35685.6	34984	31824.7	24355	28657.5	23805.2	21352	22028	26940.5	24214.4	20828.6	25015.3	0.761795	0.0602603	0	1	1	25015.3	-0.180631	0.0602625	0	1	1
ENSMUSG00000006456.10	18002.9	18641.6	20950.5	18960.8	19386.9	20138.3	20321.8	18491.1	14973.4	17688.5	19342.4	17654.8	15247.6	18598.3	17153.8	14036.9	18136.5	-0.0797679	0.0761927	0	1	1	18136.5	-0.238356	0.0762485	0	1	1
ENSMUSG00000006457.4	4599	4734	4024	3528	3132	2892	2847	2481	6988	6740.16	6390	6510	2881	2926	3114	2198	4170.41	-0.666236	0.0985433	0	1	1	4170.41	-1.38637	0.0983306	-3.92933	8.51842e-05	0.00349968
ENSMUSG00000006463.13	580.807	635.379	754.901	638.78	1268.84	1395.24	1168.17	1105.66	768.101	840.046	694.679	649.928	1270.74	1691.78	1386.23	1383.77	1006.29	0.8886	0.0999102	0	1	1	1006.29	0.879551	0.09917	0	1	1
ENSMUSG00000006464.9	755.582	900.342	720.86	645.935	1252.08	1247.81	1137.29	1053.53	625.286	746.348	757.732	589.869	1607.54	2333.16	1646.79	1733.21	1101.73	0.506145	0.109514	0	1	1	1101.73	1.41412	0.109104	3.79569	0.000147236	0.00564147
ENSMUSG00000006469.13	115	84	78	66	110	99	81	69	140	155	114	97	70	86	83	58	94.1941	-0.0744324	0.21416	0	1	1	94.1941	-0.815131	0.212464	0	1	1
ENSMUSG00000006471.18	6280.8	6723.41	6447.34	5445.05	8876.56	8811.51	9296.75	8562.54	4811.35	5921.7	5654.9	5382.44	6468.34	8755.16	7783.43	7485.08	6984.81	0.357635	0.0490246	0	1	1	6984.81	0.347467	0.0492509	0	1	1
ENSMUSG00000006476.19	132	152	132	93	288.001	274	306.999	272	348	417	352	294	509	696	539	586	336.937	1.01257	0.178645	0.0703861	0.943886	1	336.937	0.718893	0.168479	0	1	1
ENSMUSG00000006490.3	5	4	6	3	3	3	3	0	1	0	1	0	0	0	0	0	1.84563	-1.11082	1.00517	-0.110245	0.912215	NA	1.84563	-1.56909	1.64755	-0.345418	0.72978	NA
ENSMUSG00000006494.11	9883.39	10547.3	11035	9973.89	19368	19362.1	19310	17246.1	25687.5	28828.4	27314.1	25607.5	14274	18281.1	17286.7	15220.1	17875.3	0.765613	0.0520311	0	1	1	17875.3	-0.903598	0.0517786	0	1	1
ENSMUSG00000006498.16	102278	110097	96263.4	89317.5	94460.2	96794.4	98183.9	90480.2	91460.5	105270	108291	102211	83306.4	104894	98109.3	84502.5	97361.4	-0.224593	0.0473089	0	1	1	97361.4	-0.242407	0.0473095	0	1	1
ENSMUSG00000006517.5	3190	3635	3944	3530	2669	2516	2578	2422	5155	5613	5248	5062	2262	2936	2627	2274	3512.29	-0.592358	0.067531	0	1	1	3512.29	-1.19526	0.0672123	-2.90518	0.00367037	0.0951007
ENSMUSG00000006519.11	335.684	352.726	322.298	302.42	480.789	459.239	462.28	421.388	938.001	1093.43	907.059	756.804	1001.84	1562.5	1061.32	1233.35	716.617	0.370185	0.100485	0	1	1	716.617	0.234001	0.0914609	0	1	1
ENSMUSG00000006522.17	7	5	8	2	7	8	0	3	3	3	3	2	1	4	1	1	4.01845	-1.41009	0.752291	-0.545127	0.585666	1	4.01845	-1.30033	0.920271	-0.326348	0.744161	1
ENSMUSG00000006526.13	1530	1512	1581	1378.99	1900	2001.72	1998.99	1839.45	1903	2007	1834	1698	1695	2349	1977	1995	1814.93	0.223891	0.0557363	0	1	1	1814.93	-0.101812	0.0550578	0	1	1
ENSMUSG00000006527.16	1777	1767	1389	1206	1431	1482	1224	1152	2542	2954	2963	2717.99	1376	1963	1754	1502	1814.86	-0.325805	0.090773	0	1	1	1814.86	-0.81295	0.0895006	0	1	1
ENSMUSG00000006529.16	4	2	3	0	0	0	0	4	0	1	2	0	1	1	2	0	1.24909	-1.18541	1.56367	-0.118575	0.905612	NA	1.24909	0.312221	1.71438	0	1	NA
ENSMUSG00000006538.12	33	66	22	16	42.0001	21	13	24	22	31	21	35	16	34	33	30	28.5447	-0.588502	0.412054	0	1	1	28.5447	-0.0742116	0.413755	0	1	1
ENSMUSG00000006542.13	11.2259	12.274	11.1819	11.2271	5.6626	3.03384	9.07416	5.05695	25.1322	31.3003	27.1442	24.209	9.09676	10.1293	13.4474	13.2096	14.6284	-1.1983	0.449643	-0.441015	0.659202	1	14.6284	-1.65633	0.36141	-1.81603	0.0693654	1
ENSMUSG00000006546.3	7.00549	16.0572	5.0037	7	5.0049	3	12	3.00298	5.00453	8.00541	10.0154	10.0102	7	10.0048	10.0204	11.0212	7.987	-0.652304	0.559089	0	1	1	7.987	0.0623895	0.52799	0	1	1
ENSMUSG00000006567.11	291	300	279	253	265	292	283	262	729	747	542	590	501	598	497	462	430.222	-0.12449	0.109808	0	1	1	430.222	-0.41939	0.100612	0	1	1
ENSMUSG00000006574.15	17	16	21	12	14	22	18	20	46	35	22	31	17	23	25	23	25.2614	-0.0660776	0.428617	0	1	1	25.2614	-1.32563	0.406311	-0.801442	0.422876	1
ENSMUSG00000006575.14	458	529	747	691	711	704	733	686	1783	2163	2067	1828	2703	4500	3325	3477	1702.14	0.231719	0.135795	0	1	1	1702.14	0.914738	0.131413	0	1	1
ENSMUSG00000006576.16	598	673.001	625	579.999	1523	1525	1440	1521	1612	1883	1578	1358	2619	3724	2832	2982	1706.69	1.3149	0.101558	3.10066	0.00193093	0.0922522	1706.69	0.935458	0.0981015	0	1	1
ENSMUSG00000006585.3	21858	23591.9	23174	20913	19795	18812	20593	18635	24015	25694	25148	23938	17532	22050	22543	19134	21782.3	-0.311246	0.0537177	0	1	1	21782.3	-0.421343	0.0536885	0	1	1
ENSMUSG00000006586.15	582.996	551.007	558.004	494.008	469.004	506.008	513.005	519.156	153.002	155	232.977	241.002	412.981	418.984	426.003	288	407.824	-0.159673	0.150079	0	1	1	407.824	0.994523	0.156732	0	1	1
ENSMUSG00000006587.6	479	562	404	357	259	224	258	239	241	344	313	291	55	106	86	64	271.507	-0.967637	0.120116	0	1	1	271.507	-2.07346	0.14026	-7.65337	1.95779e-14	3.47417e-12
ENSMUSG00000006589.8	15967	17817	16029	15256	8352	7648	8471	7967	13272	14661	14951	13756	5792	6913	6872	5709	11385.5	-1.10298	0.0545655	-1.88724	0.0591282	1	11385.5	-1.29369	0.0547805	-5.36122	8.26603e-08	5.97787e-06
ENSMUSG00000006599.13	19551	21398	18079	16020	10275	10882	10493	10281	10743	11582	11597	11464	9083	12255	10510	9796	12805.9	-0.9081	0.0407348	0	1	1	12805.9	-0.212072	0.0409657	0	1	1
ENSMUSG00000006611.15	38.1654	34.9437	44.8347	36.1438	65.9978	66.2667	53.793	52.7193	76.4829	76.6204	74.8137	62.6036	40.8163	70.2379	55.5465	41.9524	58.3581	0.686632	0.250337	0	1	1	58.3581	-1.08926	0.23951	-0.372698	0.709373	1
ENSMUSG00000006641.12	3041.4	3376.77	3494.89	3162.1	2537.98	2457.21	2431.54	2328.59	2491.43	2996.04	3228.62	2711.62	2134.07	2729	2418.42	2138	2763.08	-0.682667	0.0792175	0	1	1	2763.08	-0.496216	0.0794326	0	1	1
ENSMUSG00000006642.3	81	136	44.0194	73	70	111.038	50	78.0593	18	16	8	14	16	9	9.00289	9	46.8127	-0.194726	0.338411	0	1	1	46.8127	-0.491967	0.43179	0	1	1
ENSMUSG00000006649.17	7226.7	8091.49	8368.64	7031.33	35182.2	33915.8	35582.5	31436	6809.65	8089.4	7926.53	7570.69	11024.4	13103.9	13582.8	11719.4	15356.8	2.12675	0.066371	16.9766	1.22425e-64	1.29263e-60	15356.8	0.683307	0.0665811	0	1	1
ENSMUSG00000006651.8	10362	11606	12148	11008	17879	16993	17930	16451	9048	9714.01	9814	9186	8763	10004	10019	8315	11754.7	0.369435	0.0589984	0	1	1	11754.7	-0.272824	0.059297	0	1	1
ENSMUSG00000006673.14	15154.9	16193.1	15160	13655.6	15829.4	17062	16157.5	15218.4	16389.7	18870.3	19094.4	17714.3	16009.6	20618.1	18254	16151.9	16689.3	0.00662936	0.0452614	0	1	1	16689.3	-0.118816	0.0451658	0	1	1
ENSMUSG00000006675.10	475.257	508.035	484.035	382.075	831.065	825.074	633.19	634.211	473.055	578.128	599.189	524.01	1409.09	2095.53	1679.38	1635.35	835.664	0.567451	0.096185	0	1	1	835.664	1.52002	0.0931605	5.58193	2.37859e-08	1.86032e-06
ENSMUSG00000006676.16	15290.3	16636.2	17185.2	16093.3	23742.6	24102.8	24348.7	22214.7	25451.3	28718.6	28133.4	25848.2	27010.3	35512.3	31788.8	28827.3	24288.3	0.412272	0.0357126	0	1	1	24288.3	0.119782	0.0354643	0	1	1
ENSMUSG00000006678.6	15438.8	15425.3	11731.6	10385.9	15259.9	15996.6	16195.9	15560.7	14224.3	16858.8	16043.3	13798.6	16133	21246.9	17224.3	15823.2	15329.6	0.122912	0.0711422	0	1	1	15329.6	0.0570441	0.0710821	0	1	1
ENSMUSG00000006699.17	30510	31938	28556	25670	19445	19756	18821	18232	25982	29472	28249	25947	14250	19512	16423	15623	23187.5	-0.706989	0.0252277	0	1	1	23187.5	-0.857359	0.0253417	0	1	1
ENSMUSG00000006705.13	2870.14	2970.47	2432.05	2176.27	2959.16	2936.21	2983.47	2786	2945.32	3466.49	3364.27	3006.13	2661.45	3655.39	3119.63	2961.01	2943.07	-0.00450349	0.0515483	0	1	1	2943.07	-0.196996	0.0511038	0	1	1
ENSMUSG00000006711.15	11.0001	11.0001	16.1475	12	39.0087	32.011	29	26.7043	23	30	34	16	44.1206	40	36.0452	36	27.2646	0.521506	0.494841	0	1	1	27.2646	0.277218	0.467213	0	1	1
ENSMUSG00000006715.11	6947	7780	7425	6949	6758	6743	6448	6066	9531	10607	9962	9375	5442	7194	6526	5641	7498.12	-0.266469	0.0422901	0	1	1	7498.12	-0.810959	0.0421228	0	1	1
ENSMUSG00000006717.7	997	1038	959	855	823	803	810	808	1148	1190	1104	1100	1021	1331	1283	1091	1020.28	-0.335265	0.0629788	0	1	1	1020.28	-0.0934198	0.060702	0	1	1
ENSMUSG00000006720.16	952.999	1041	1057	876	1833	1862	1707	1652	1071	1231	1196	1023	1268	1743	1398	1288	1315.51	0.759122	0.0698975	0	1	1	1315.51	0.213678	0.069926	0	1	1
ENSMUSG00000006724.12	75	84	63	61	47	46	66	53	86	97	81	89	92	98	83	95	78.2698	-0.391847	0.241499	0	1	1	78.2698	-0.0334152	0.229657	0	1	1
ENSMUSG00000006728.12	50533.6	54050.1	51582.7	46878.2	61466.3	57393.6	57847.9	53194.7	43941.2	48063.5	48288.8	44807.1	42283.6	53423.8	50336	43386.1	50500.2	0.201222	0.0437832	0	1	1	50500.2	0.0358727	0.0438174	0	1	1
ENSMUSG00000006731.10	448.776	570.615	666.664	643.112	503.403	458.452	456.811	405.516	990.314	1151.31	1146.44	835.576	699.408	1001.27	723.516	831.266	717.603	-0.406715	0.122935	0	1	1	717.603	-0.422374	0.119305	0	1	1
ENSMUSG00000006732.14	3545.69	3813.8	4108.9	3583.39	3542.72	3474.35	3428.37	3077.93	2761.19	3036.48	3214.49	3049.02	2528.17	3125.37	2886.77	2633.03	3247.83	-0.229413	0.0582107	0	1	1	3247.83	-0.204407	0.0587916	0	1	1
ENSMUSG00000006736.9	3612.15	4009.91	3524.71	3254.59	3747.39	3450.23	3219.64	3079.35	3346.64	3971.23	3628.93	3348.3	2814.3	3911.63	3108.66	2991.8	3445.38	-0.280937	0.0560468	0	1	1	3445.38	-0.320096	0.0561438	0	1	1
ENSMUSG00000006740.14	31348.4	33356.7	26608.7	23675.7	17727.1	19596	18445.2	17664.1	27692.7	32269.1	30800.4	27626.4	21804.7	31122.6	24699.9	24388.1	25449.5	-0.664285	0.055219	0	1	1	25449.5	-0.262195	0.0551435	0	1	1
ENSMUSG00000006763.14	3265.53	3674.83	3382.99	2854.64	2741.64	2677.21	2845.83	2536.82	3246.07	3491.54	3249.64	3249.16	2355.46	3016.56	2692.47	2374.37	3031.4	-0.420609	0.0502932	0	1	1	3031.4	-0.766058	0.0503655	0	1	1
ENSMUSG00000006764.8	17	13	25	25	37	26	31	37	6	4	3	5	3	3	5	2	15.484	0.782885	0.485836	0	1	1	15.484	-0.0366277	0.677778	0	1	1
ENSMUSG00000006777.7	2	6	3	9	6	12	3	6	0	2	2	0	1	0	1	0	3.36829	0.30213	0.801881	0	1	1	3.36829	-1.09412	1.40767	-0.0668612	0.946692	1
ENSMUSG00000006782.16	1785.26	1932.21	2080.2	1858.22	1853.27	1972.29	1929.39	1911.5	2695.23	2973.38	2662.2	2467.24	1806.48	2241.67	2082.75	1730.6	2125.08	-0.091889	0.0658235	0	1	1	2125.08	-0.552044	0.0651878	0	1	1
ENSMUSG00000006784.14	213.332	243.674	335.421	283.114	162.132	211.519	205.117	205.857	187.059	180.982	171.119	226.882	133.401	151.777	155.572	136.62	205.883	-0.566313	0.197157	0	1	1	205.883	-0.648568	0.201585	0	1	1
ENSMUSG00000006800.14	15697.3	16576.2	14930.3	13218.9	23238.8	23461.5	24000	21281.5	17804.5	20366.5	21221.4	19154.3	22147	30265.5	27779.9	25303.4	20797.7	0.481683	0.050654	0	1	1	20797.7	0.32596	0.0505486	0	1	1
ENSMUSG00000006818.5	18607.4	20104.3	19330.6	17112.2	14478.4	14910.4	14893.6	13970.2	13136.2	15176.6	15892.7	14271.6	13061.7	16407.2	14234.5	12753.3	15596.4	-0.530053	0.0377108	0	1	1	15596.4	-0.0127388	0.0378359	0	1	1
ENSMUSG00000006850.8	979	1115	1206	1064	2071	1991	1830	1723	1692	1804	1737	1518	1635	2216	1950	1579	1616.85	0.678466	0.0717399	0	1	1	1616.85	-0.00912993	0.0706445	0	1	1
ENSMUSG00000006906.10	313.598	398.298	392.014	344.71	582.3	589.895	626.533	616.903	178.202	264.425	232.926	218.074	316.14	369.337	384.085	365.678	386.32	0.689613	0.0943438	0	1	1	386.32	0.547999	0.101957	0	1	1
ENSMUSG00000006920.14	2956.04	3059.99	3181.07	2756	4447.03	4669	4811.77	4505	3459.02	3666.01	3453.06	3434.15	4874	6582.13	5736	5514.04	4128.12	0.377499	0.0399387	0	1	1	4128.12	0.598931	0.0393538	0	1	1
ENSMUSG00000006930.15	5000	5324	5100	4186	7531	7686	6313	5631	14839	18246	17556	14825	17690	26069	19636	20381	12051.2	0.354767	0.0773921	0	1	1	12051.2	0.245525	0.0765713	0	1	1
ENSMUSG00000006931.15	811	894	1115	942	827	821	992	780	1729	2073	2122	1857	1431	1909	1857	1607	1344.94	-0.304278	0.0946007	0	1	1	1344.94	-0.449489	0.0914419	0	1	1
ENSMUSG00000006932.17	89755.9	93014	79165.9	71626	93491.3	94536.4	93543.3	88244.3	82987.9	92739.1	88330	83139	82726.2	102995	93959.2	82478.3	88065.1	0.0539567	0.0436847	0	1	1	88065.1	-0.0902339	0.0436835	0	1	1
ENSMUSG00000006941.5	1748	1860	1609	1357	1797	1672	1643	1383	1694	1973	1752	1689	1535	2118	1806	1582	1693.71	-0.067189	0.0596966	0	1	1	1693.71	-0.135212	0.0592958	0	1	1
ENSMUSG00000006948.7	3	0	0	0	0	0	0	0	2	7	0	0	0	0	0	0	0.746663	-2.09354	3.56004	-0.307171	0.758714	NA	0.746663	-3.67543	3.49366	-0.765797	0.443797	NA
ENSMUSG00000006958.14	389	437.459	464.676	401.495	749.675	805.938	870.969	782.981	1272.39	1578.81	1616.97	1360	2434.83	3315.86	3119.85	3032.37	1350.07	0.617363	0.0889422	0	1	1	1350.07	0.880542	0.0810118	0	1	1
ENSMUSG00000006998.16	55386.9	59202.8	53691.8	48320.7	36301	36169.8	36486.8	34156.8	63087.8	68894.6	65974.8	60788.9	35872.9	44839.9	40063.9	35109.8	48698.6	-0.690615	0.0306343	0	1	1	48698.6	-0.851936	0.0305907	0	1	1
ENSMUSG00000007021.5	164	209	190	193	128	126	158	139	631	656	545	575	301	295	276	295	307.205	-0.550554	0.133985	0	1	1	307.205	-1.15603	0.118608	-1.31552	0.188334	1
ENSMUSG00000007029.16	42419	46028	41854	36445	36229	37094	39615	36321	51524.9	59423	55573	50915	38942	52544	46123	42216	44507.4	-0.274732	0.0300974	0	1	1	44507.4	-0.315316	0.0300112	0	1	1
ENSMUSG00000007030.8	44.673	42.8306	49.0685	45.4718	61.774	61.7547	67.3831	58.3019	67.9362	84.7163	47.9168	59.9439	85.3933	151.213	109.478	141.679	72.4236	0.35772	0.210231	0	1	1	72.4236	0.763611	0.191615	0	1	1
ENSMUSG00000007033.4	385.544	386.217	267.446	214.468	303.793	303.85	296.329	261.146	176.367	211.676	226.805	204.213	418.24	628.29	529.447	512.977	327.161	-0.189872	0.126443	0	1	1	327.161	1.21724	0.126788	1.71338	0.0866428	1
ENSMUSG00000007034.15	427.001	401	452.001	439	669	611	609	567	600.999	750.001	681	560	493	783	476	566	564.684	0.406709	0.107699	0	1	1	564.684	-0.29485	0.106117	0	1	1
ENSMUSG00000007035.15	70	40.1511	79	75	299.59	295.001	240	234	70.3289	74	74.9999	64.5183	197.922	310.793	231.784	298.525	154.069	1.27035	0.247528	1.09218	0.274753	1	154.069	1.65212	0.246573	2.64474	0.00817544	0.186841
ENSMUSG00000007036.15	1349	1469	1545	1320	2721	2668	2798	2461	2518	2900	2868	2362	3681	5042	4302	4250	2724.26	0.715838	0.0518351	0	1	1	2724.26	0.645183	0.0494127	0	1	1
ENSMUSG00000007038.5	899	1023	824	758	1332	1252	1380	1234	1858	2171	1848	1579	1715	2581	2080	2098	1517.12	0.378102	0.0854875	0	1	1	1517.12	-0.0251486	0.082679	0	1	1
ENSMUSG00000007039.12	1390.01	1512	2152	1936	8234	8059	8378	7844	5240	5755	4928	4455.99	10303	14666	12543	12210	6674.17	2.078	0.118793	9.07463	1.14063e-19	7.29901e-17	6674.17	1.1934	0.11788	1.64067	0.100866	1
ENSMUSG00000007041.9	1492.57	1600.27	1690.84	1624.24	3386.78	3235.7	3300.15	3160.1	4626.52	5193.86	4717.71	3997.64	4948.87	7924.97	5634.06	5947.8	3829.89	0.917954	0.0814049	0	1	1	3829.89	0.262745	0.0796376	0	1	1
ENSMUSG00000007050.17	6296.18	7235.18	8269.91	7757.81	6686.03	6235.74	6665.49	6261.3	6562.18	7525.84	7777.42	7019.63	4929.4	6265.02	5947.51	5186.97	6715.5	-0.341135	0.0840026	0	1	1	6715.5	-0.541645	0.0840951	0	1	1
ENSMUSG00000007080.14	16733.5	16252.3	15855.3	13949.4	19953.6	20784.6	19610.7	17933	17374	20178	19511.9	17568.5	19415	26050.2	23229.5	21592.1	18940.1	0.0878476	0.0403041	0	1	1	18940.1	0.0955008	0.0401979	0	1	1
ENSMUSG00000007097.14	15.0245	21.4216	19.3306	16.0959	21.0461	28.1915	22.1308	21.1754	95.6859	79.0745	63.3413	61.2545	32.2037	30.0897	43.0615	36.802	39.1775	0.280639	0.304084	0	1	1	39.1775	-1.3398	0.249011	-1.36462	0.172374	1
ENSMUSG00000007107.6	95	146	161	156	101	109	166	156.932	207	202	366	356	49	25	56	33	152.347	-0.166057	0.291142	0	1	1	152.347	-2.89644	0.302637	-6.26638	3.69548e-10	3.82537e-08
ENSMUSG00000007122.11	201	207	232	211	183	160	202	161	415	475	513.001	501.001	158	173	212	131	258.083	-0.302206	0.150015	0	1	1	258.083	-1.51598	0.145966	-3.53491	0.000407907	0.0140033
ENSMUSG00000007207.10	728	801	740	616	1116	1240	1197	1105	680	752.001	681	667	883.001	1166	903	970	888.78	0.666163	0.0691948	0	1	1	888.78	0.485409	0.0700293	0	1	1
ENSMUSG00000007209.4	38	14	31	16	5	6	4	5	14	9	16	6	0	0	2	2	11.9276	-2.23536	0.564368	-2.18892	0.0286025	0.901491	11.9276	-3.66029	0.878712	-3.02749	0.0024659	0.0670648
ENSMUSG00000007216.6	526	558	439	379.766	964	891.488	802	677	965	1101	1097	976.33	1212	1644.29	1359.68	1469	919.427	0.804413	0.0852384	0	1	1	919.427	0.301534	0.0800336	0	1	1
ENSMUSG00000007279.14	59	80	75	42	121	140	123	94	268	289	318	309	106	96	120	65	143.68	0.831227	0.18725	0	1	1	143.68	-1.7372	0.171941	-4.2875	1.80696e-05	0.000842329
ENSMUSG00000007338.10	6894	7711	7379	6559	6402.72	6226.71	6396	5684	6870.73	7762	7601	7020	5083	6611	6054	5156	6593.43	-0.27024	0.0439451	0	1	1	6593.43	-0.415268	0.0440083	0	1	1
ENSMUSG00000007379.15	6206.41	6055.24	5168	4879.13	5127.28	5074.33	5101.04	4611.67	6014.36	7064.82	7119.7	6456.15	5410.86	7298.17	6000.09	5688.9	5814.82	-0.245605	0.0486762	0	1	1	5814.82	-0.234881	0.0483272	0	1	1
ENSMUSG00000007411.16	10184.5	11059	10195.3	8765.77	8761.22	9216.5	9548.47	8997.67	9705.26	10696.1	10588.6	10011.1	10018.3	13576.2	11765.2	11164.8	10235.1	-0.229826	0.0356571	0	1	1	10235.1	0.0656925	0.0354751	0	1	1
ENSMUSG00000007415.15	6010.82	6832.77	6438.54	5441.13	5735.51	5979.97	5990.01	5539.93	5088.8	5738.26	5250.17	4860.61	4274.31	5617.88	4764.98	4654.13	5523.39	-0.180004	0.0330759	0	1	1	5523.39	-0.18494	0.0335878	0	1	1
ENSMUSG00000007440.10	0	1.58005	0	0	0	1.41653	1.45511	5.97877	2.14503	0	0	0	1.4711	1.35096	8.21963	0	1.34908	1.97898	1.95058	0.501892	0.615743	NA	1.34908	2.16114	1.93475	0.600151	0.548406	NA
ENSMUSG00000007457.3	153	189	235	190.817	301	328	312.886	286.617	72	109	130	103	245.761	333	266.827	260.465	217.074	0.574634	0.135053	0	1	1	217.074	1.2881	0.144167	1.99838	0.0456751	0.750421
ENSMUSG00000007458.14	16696.9	17766.9	17194	15330	18387	18653	17345.9	16202	15708	18441	17800	16153.9	17346	24009	19687.9	18641	17748.9	-0.0264428	0.0329421	0	1	1	17748.9	0.0901292	0.0328874	0	1	1
ENSMUSG00000007476.18	1238.71	1503.95	1342.08	1167.8	1606.21	1791.69	1603.51	1533.7	2033.18	2684.28	2358.25	1964.27	2072.92	2617.58	2119.72	2217.75	1852.89	0.221629	0.0685889	0	1	1	1852.89	-0.121076	0.0667184	0	1	1
ENSMUSG00000007480.4	208	266	436.945	400	196.878	209	205	219	160.728	185	239	239	230	197	285.842	196	245.241	-0.772809	0.232129	0	1	1	245.241	0.0304505	0.233708	0	1	1
ENSMUSG00000007564.15	34476	36133	31884	30032	30522	29418	30068	28583	27366	30098	29822	27789	22874	29871	26558	23298	29356.2	-0.25369	0.0315516	0	1	1	29356.2	-0.289394	0.0316355	0	1	1
ENSMUSG00000007570.16	1884.39	2014.05	2383.46	2157.89	3435.53	3266.04	3297.74	2894.92	2829.97	3202.64	3030.49	2836.01	2857.51	3905.32	3369.96	3112.17	2876.08	0.442565	0.0652891	0	1	1	2876.08	0.0316547	0.0647138	0	1	1
ENSMUSG00000007589.9	2744.91	2904.51	2961.57	2654.75	3699.92	3598.96	3562.51	3331.36	7658.89	8681.52	8290.49	7493.23	7665.94	10347.7	8978.05	8622.81	5764	0.158622	0.0487756	0	1	1	5764	-0.0254026	0.0465976	0	1	1
ENSMUSG00000007591.15	14	9	9	6	8	8	8	18	10	9	16	14	43	55	52.0001	31	18.8687	-0.0644204	0.425563	0	1	1	18.8687	1.77993	0.360294	2.1647	0.0304108	0.534263
ENSMUSG00000007594.10	423	402	233	208	229	206	270	253	753	949	623	602	524	944	737	847	503.69	-0.616243	0.223439	0	1	1	503.69	-0.000750186	0.218061	0	1	1
ENSMUSG00000007603.9	7818.01	8958	10418	9376	8283	8386	9508	8469	8272	9387	9866.01	9337	7425.99	9263	8747	7827	8876.84	-0.208329	0.0929297	0	1	1	8876.84	-0.345312	0.0929449	0	1	1
ENSMUSG00000007610.15	3885.45	4536.45	4218.54	3776.93	4972.84	4768.79	4828.72	4415.72	3507.8	3948.77	3711.06	3355.85	3749.13	4718.75	4296.42	3836.79	4142.23	0.0508188	0.0514242	0	1	1	4142.23	0.060889	0.0517455	0	1	1
ENSMUSG00000007613.15	3282.61	3287.24	3097.51	2561.84	3516.57	3882.57	3628.99	3469.4	2998.55	3612.81	3729.84	3150.13	3578.98	4931.65	3720.26	3803.99	3495.28	0.156143	0.0606861	0	1	1	3495.28	0.192187	0.0604471	0	1	1
ENSMUSG00000007617.18	1813.38	1918.26	1780.1	1480.5	1735.13	1907.35	1728.73	1692.58	2232.43	2515.38	2401.71	2318.15	1265.31	1602.56	1365.05	1345.81	1817.96	0.0222858	0.04262	0	1	1	1817.96	-0.799662	0.042635	0	1	1
ENSMUSG00000007646.13	1683.63	1793.13	1710.42	1482.27	1600.78	1644.91	1472.92	1431.08	2190.74	2464.75	2142.57	2094.73	1591.4	2195.2	1885.21	1772.86	1821.23	-0.218378	0.0548377	0	1	1	1821.23	-0.363213	0.0535842	0	1	1
ENSMUSG00000007653.12	15.1063	9.04803	13.0003	7.01134	20	33.005	17.0005	12.082	14	16.1919	13.1223	5.00164	29	49	20.0029	27.0009	17.7294	0.724782	0.416358	0	1	1	17.7294	0.925144	0.402447	0	1	1
ENSMUSG00000007655.16	2	4	1	5	4	2	3	0	2	1	0	0	0	1	0	0	1.86731	0.551679	1.26098	0	1	NA	1.86731	-2.12255	1.68259	-0.667155	0.504673	NA
ENSMUSG00000007656.13	12106	13398	12463	10748	9424	9789	9853	9201	10692	11809	11699	11022	8422	10978	9389.01	8320.01	11005.9	-0.967243	0.0425865	0	1	1	11005.9	-0.799898	0.0426526	0	1	1
ENSMUSG00000007659.18	4089.81	4447	4700	4335	4897.77	4857.99	4776	4552	3752.5	4614	5076	4412.01	4858	6613	5918.46	5259.71	4797.85	0.00259417	0.0740119	0	1	1	4797.85	0.231007	0.0738915	0	1	1
ENSMUSG00000007670.10	17825	20190	20087	17364	20796	22357	22623	21820	27148	30461	30062	27765.1	21565	26236	24101	21519	23175	0.112208	0.0447998	0	1	1	23175	-0.386313	0.0446779	0	1	1
ENSMUSG00000007682.6	1	1	1	1	0	1	1	0	0	1	1	1	1	3	0	1	0.850927	-1.09911	1.56328	-0.0633996	0.949448	NA	0.850927	0.579569	1.42268	0	1	NA
ENSMUSG00000007721.6	8682	10947	11260	10136	4018	4016	4460	3908	6529	6303	6253	6266	2224	2713	2593	2217	5859	-1.41323	0.0819357	-5.04336	4.57431e-07	5.13807e-05	5859	-1.43296	0.0826619	-5.23776	1.62535e-07	1.11076e-05
ENSMUSG00000007739.10	61987.9	66009.9	56872.9	51744	42627	42037	44847	41721.1	49557	54479	53492	51254	41182	52558	49186	43567.1	50171.9	-0.513277	0.0499408	0	1	1	50171.9	-0.160183	0.0499433	0	1	1
ENSMUSG00000007777.9	2098	2202	2002	1730	2313	2255	2191	2052	1730	2045	1859	1687	1926	2445	2109	1991	2032.17	0.0299617	0.0420333	0	1	1	2032.17	0.0713595	0.0424577	0	1	1
ENSMUSG00000007783.10	4704.92	5130.04	3376.23	2971.29	3311.96	3450.64	3454.77	3263.92	3796.64	4784.25	4390.67	3905.61	5435.5	7768.12	6541.88	6376.78	4482.72	-0.354403	0.0928479	0	1	1	4482.72	0.478594	0.0924141	0	1	1
ENSMUSG00000007805.4	3	7	1	1	4	5	6	0	6	6	4	8	1	5	1	6	3.97771	0.236515	0.858944	0	1	1	3.97771	-1.1903	0.820586	-0.231902	0.816614	1
ENSMUSG00000007812.16	6044	6145	5293	4557	7788	8299	7513	7203	5878	7093	6409	5749	8024	11773	9262	9469	7172.98	0.37012	0.0484121	0	1	1	7172.98	0.426083	0.0481526	0	1	1
ENSMUSG00000007815.13	34610.7	37160.2	35754.6	32030.2	29826.9	31072.9	30725.8	28929.1	31689.8	35681.5	34823.1	31899.3	26016.2	34876.4	29252.6	26873.8	32009	-0.3101	0.0249568	0	1	1	32009	-0.328179	0.0249829	0	1	1
ENSMUSG00000007817.15	5811.74	5909.09	5526.4	4920	6725.01	7383.15	6023.27	5673.4	4978	5892.35	5777.27	5529.42	3518.59	4035	3600	3033	5275.41	0.0696876	0.0629896	0	1	1	5275.41	-0.768297	0.0635127	0	1	1
ENSMUSG00000007827.10	3288	3376	2673	2271	3331	3640	3099	2877	3825	4517	4046	3652	4713	5970	5261	4988	3797.48	0.010433	0.0801325	0	1	1	3797.48	0.241882	0.0794378	0	1	1
ENSMUSG00000007833.15	5602.63	6026.83	6832.6	6015.06	7137.72	7251.43	7402.1	6885.63	5039.04	5333.26	5311.69	4915.96	5150.5	7188.88	6288.9	6077.05	6157.25	0.25741	0.0784436	0	1	1	6157.25	0.380039	0.0786281	0	1	1
ENSMUSG00000007836.6	36721	40865	40616	35465	34135	35385	35311	33426	46832	48451	47621	45637	29513	36910	33176	29555	38262.2	-0.248973	0.0426094	0	1	1	38262.2	-0.675182	0.0425937	0	1	1
ENSMUSG00000007837.11	316	322.001	310	307	337	359	292.001	321	451.999	495	461.999	391.999	406	634	522.001	615	408.328	0.0737402	0.109205	0	1	1	408.328	0.154601	0.103902	0	1	1
ENSMUSG00000007850.16	42569.9	47248.8	50586.8	42977.3	46238.1	47136.7	50047.4	47353.7	51249.8	60360.9	60486.8	56149.9	44781.8	53788.5	53385.5	48713.7	50200.8	-0.0883476	0.0585598	0	1	1	50200.8	-0.317548	0.0585368	0	1	1
ENSMUSG00000007867.9	301	312	345	309	749	671	745	643	791	984	859	861	1054	1395	1235	1102	759.823	1.04447	0.0751734	0.591621	0.554104	1	759.823	0.305186	0.0655935	0	1	1
ENSMUSG00000007872.3	3020	3621	5014	4953	3572	3397	4339	4233	1764	1901	2707	2681	3390	4243	4293	3354	3539.93	-0.176818	0.207724	0	1	1	3539.93	0.655673	0.207988	0	1	1
ENSMUSG00000007877.2	2	4	3	4	2	1	1	4	2	6	1	3	2	1	6	7	3.08819	-0.798093	0.906848	0	1	1	3.08819	0.320529	0.841443	0	1	1
ENSMUSG00000007880.16	49256	50362.5	40364	34506.9	55497.4	59361.2	61133.7	55803.4	36767.9	44767.4	46413.8	41691.6	45561.7	58385.9	52422.2	45489.9	48338.1	0.338159	0.0697462	0	1	1	48338.1	0.144436	0.0697584	0	1	1
ENSMUSG00000007888.15	122	152	263	199	103	121	170	133	67	89	139	117	52	55	71.9999	59	118.268	-0.807065	0.219479	0	1	1	118.268	-0.951722	0.234764	0	1	1
ENSMUSG00000007891.16	18573.6	19683.8	15055.7	14504.8	21513.2	21650.4	20211.2	19381.8	19694.9	22018.3	21061.3	18715.7	28437.2	39926.7	32378	31200.8	22457.4	0.195327	0.0582422	0	1	1	22457.4	0.566288	0.0581176	0	1	1
ENSMUSG00000007892.8	126291	141255	134418	124451	120813	117906	137367	123671	112726	118870	119280	114938	88595.7	110669	110732	94260.6	118930	-0.18672	0.0581943	0	1	1	118930	-0.346477	0.0582075	0	1	1
ENSMUSG00000007907.4	60	79	64	36	84	84	72	70	7	8	21	20	74	75	74	78	55.8728	0.289747	0.229002	0	1	1	55.8728	2.30409	0.284562	4.5828	4.58788e-06	0.000236298
ENSMUSG00000007908.14	260	205	199	163	170	161	163	168	162	204	195	158	246	344	306	266	209.954	-0.64615	0.158523	0	1	1	209.954	0.433483	0.15552	0	1	1
ENSMUSG00000007944.8	76.2535	91.1801	143.691	131.564	153.632	165.61	153.874	151.566	96.1974	153.917	144.143	140.452	210.72	340.498	261.448	274.913	165.343	0.386961	0.191228	0	1	1	165.343	0.892896	0.185582	0	1	1
ENSMUSG00000007946.11	119	119.055	132	126	99	112	121	126	89	106	91.0282	84	81	80	88	67	103.544	-0.323562	0.150161	0	1	1	103.544	-0.2783	0.161408	0	1	1
ENSMUSG00000007950.9	611.626	649.179	599.528	505.865	578.64	628.589	607.223	521.26	1353.75	1520.89	1341.01	1223.58	1018.16	1330.51	1220.44	1130.48	926.12	-0.101958	0.0653117	0	1	1	926.12	-0.326865	0.0576277	0	1	1
ENSMUSG00000007987.12	801.999	803	694	660	920.999	887	874	756	595	631.001	699	622	771	1069	982	829	780.81	-0.094578	0.101865	0	1	1	780.81	0.140571	0.102283	0	1	1
ENSMUSG00000007989.7	833.769	790.561	671.174	523.593	1076.16	1300.29	1044.14	959.435	1286.19	1435.39	1207.05	1101.21	1456.46	1919.87	1436.38	1313.8	1127.71	0.439582	0.111361	0	1	1	1127.71	0.14541	0.109278	0	1	1
ENSMUSG00000008028.15	226.715	241.694	325.137	248.779	563.541	540.749	460.484	431.556	125.407	177.41	178.665	153.61	386.221	489.495	505.983	508.966	345.054	0.839655	0.158519	0	1	1	345.054	1.51474	0.162763	3.16254	0.00156402	0.045681
ENSMUSG00000008035.12	1730	1777	1772	1619	1054	954	1277	1040	5573	6626	6443.01	5749	1740	2832	1963	2330	2679.71	-0.582258	0.128985	0	1	1	2679.71	-1.28972	0.127209	-2.27748	0.0227577	0.424912
ENSMUSG00000008036.11	6899	7698	7619	6877	5030	4835	5169	4724	5063	5738	5733	5161	3176	4218	3623	3327	5357.68	-0.66496	0.0430615	0	1	1	5357.68	-0.735384	0.0438165	0	1	1
ENSMUSG00000008090.14	632	707	596	529	1059	1090	1087	970	694	766.999	698	612.999	854	1138	1028	961	837.276	0.664883	0.075301	0	1	1	837.276	0.653999	0.0748772	0	1	1
ENSMUSG00000008129.14	590	570	746	635	1000	1038	1283	1089	245	257	302	345	497	549	652	457	630.287	0.559982	0.196543	0	1	1	630.287	0.760267	0.200254	0	1	1
ENSMUSG00000008136.14	28	52	60	63.9999	58	76	43	56	52	76	91	76	81	164	121	130	75.4406	0.0186166	0.27455	0	1	1	75.4406	0.606716	0.260252	0	1	1
ENSMUSG00000008140.17	5861.01	6636	7406.01	6666.01	8800.99	8702	8799	7843.99	7889	9051	9119	7994	8507	11138	10194	9190.99	8323.44	0.333656	0.0656259	0	1	1	8323.44	0.158347	0.0654414	0	1	1
ENSMUSG00000008153.11	5978	6560	6579	5943.99	2980	2975	3821	3472	4140	4452	4132	3715	2270	2618	2692	2189	4528.72	-1.06636	0.0899062	-0.738128	0.460436	1	4528.72	-0.947635	0.0904668	0	1	1
ENSMUSG00000008167.14	3227.78	3469	2810	2621	2880	2837	2797	2648	2372.61	2492.01	2513	2226	1903	2638	2308.69	2008	2611.48	-0.275295	0.0603428	0	1	1	2611.48	-0.22783	0.0611339	0	1	1
ENSMUSG00000008193.13	103.023	79	77.0007	61.6694	83.0001	95.0079	113.002	108	59	62	63	84.0176	74.008	82.0001	85.0064	78	81.6805	0.00778843	0.201758	0	1	1	81.6805	-0.121983	0.207956	0	1	1
ENSMUSG00000008200.14	15053	15759	13060	11335	12487	12845	12492	11739	11893	13281	12647	12025	9799	13166	11433	10671	12490.9	-0.195352	0.0684362	0	1	1	12490.9	-0.120977	0.0684995	0	1	1
ENSMUSG00000008206.16	926.126	897.76	966.28	849.159	1353.8	1312.77	1158.94	1129.03	1890.96	2033.22	1581.27	1620.68	1781.68	2287.37	1967.81	1848.71	1459.97	0.254586	0.096416	0	1	1	1459.97	-0.0420606	0.0941495	0	1	1
ENSMUSG00000008226.14	2017	2073	2277.04	2077.97	1514	1603.03	1522	1368.45	1620.91	1919.95	1855	1666	1222	1499.98	1340.01	1211.97	1698.59	-0.745616	0.075341	0	1	1	1698.59	-0.56213	0.0759858	0	1	1
ENSMUSG00000008301.11	6287.8	7098.32	6862.18	6446.64	5148.13	5019.56	5141.49	4848.61	5637.02	6508.9	6650.71	6262.62	4576.55	5960.82	5563.7	4964.1	5851.83	-0.572914	0.0420474	0	1	1	5851.83	-0.428644	0.0420665	0	1	1
ENSMUSG00000008305.18	4054.14	4536.47	4910.21	4372	4129	4087.2	4326	4017.4	3234	3714	3416	3580	2827.01	3711.25	3195	2891	3833.01	-0.299133	0.0576914	0	1	1	3833.01	-0.306186	0.0583266	0	1	1
ENSMUSG00000008307.11	156.349	183.901	128.157	93.8869	155.225	161.3	165.183	112.353	103.726	127.968	100.208	129.597	129.784	177.181	155.984	166.611	140.301	-0.421334	0.178755	0	1	1	140.301	0.234045	0.180437	0	1	1
ENSMUSG00000008318.10	566	603	517	440	543	536	491	457.56	627	699	618.713	606.812	410	457.796	379	340	530.916	-0.317507	0.145645	0	1	1	530.916	-1.0162	0.146105	-0.110909	0.911688	1
ENSMUSG00000008333.12	11162	12509	11106	9913	6993	7221	7135	6640	8540	9121	9321	8705	5260	7016	6150.99	5632	8297.02	-0.738043	0.0337542	0	1	1	8297.02	-0.602471	0.0341177	0	1	1
ENSMUSG00000008348.9	52123.5	55913.2	55510.1	48474.9	60903.2	63968.1	72324.4	65699.3	59772.8	69091.7	69622.2	64917.3	74578.4	105702	85054.9	81288.5	67201.2	0.209415	0.0504729	0	1	1	67201.2	0.258098	0.0504356	0	1	1
ENSMUSG00000008373.16	16198.1	18240.1	19522	17496.1	14370.1	13982	14058.1	12833	13542	14942	15273.1	13799.1	8524	10374.1	10045	8532.04	13990.8	-0.516627	0.0623913	0	1	1	13990.8	-0.729389	0.0625941	0	1	1
ENSMUSG00000008384.8	852	993	1116	973	1119	1109	1017	960	781	883	745	689	425	593	510	502	829.685	-0.0220396	0.0940469	0	1	1	829.685	-0.674515	0.0975974	0	1	1
ENSMUSG00000008393.9	6143	6605.73	5599.34	5298.78	5154	5461	5180.67	4928.58	8534	9175.62	8323.53	7853.85	5163	6227	5414	4593	6251.23	-0.284321	0.0550301	0	1	1	6251.23	-0.791229	0.0547631	0	1	1
ENSMUSG00000008398.15	439.655	513.584	507.214	428.323	824.785	859.858	850.056	798.005	1461.4	1723.85	1971.27	1702.64	1428.2	1986.53	1775.16	1753.99	1117.45	0.165743	0.0713223	0	1	1	1117.45	-0.291669	0.062948	0	1	1
ENSMUSG00000008429.8	2087	2173	1729	1512	2221	2378	2028	1921	2384	2665	2411	2236	2254	3245	2307	2498	2239.26	0.0617683	0.0739744	0	1	1	2239.26	-0.0859042	0.0732649	0	1	1
ENSMUSG00000008435.15	2243.08	2354.77	2622.52	2366.85	2700.85	2615.14	2439.58	2306.97	2689.86	3075.83	3193.63	2959.38	2407.5	3197.03	2610.44	2508.01	2640.57	0.0262431	0.0759869	0	1	1	2640.57	-0.206358	0.0756419	0	1	1
ENSMUSG00000008438.3	18	16	11	11	13	10	14	8	1	11	8	9	7	8	14	23	11.3459	-0.407654	0.499514	0	1	1	11.3459	0.750467	0.527235	0	1	1
ENSMUSG00000008450.8	8436	9945.25	10420.7	9793.27	6970.02	7149.57	9015.97	6036.77	5933.25	6056.34	6131.48	6444.49	3472.54	4114.43	4125.83	3442.32	6753.08	-0.511003	0.0933817	0	1	1	6753.08	-0.765158	0.0939016	0	1	1
ENSMUSG00000008461.6	51.0146	34.0207	42.0001	11.0022	5	3	7	2.0005	298	397	385.058	271	421	621.047	409.036	540.024	214.903	-3.149	0.534926	-4.01739	5.88471e-05	0.00421245	214.903	0.377371	0.396834	0	1	1
ENSMUSG00000008475.13	5868	6831	7149	6447	4215	4411	4503	4170	9908	11122	11365	10332	5634	7392.01	6216	5920	6999.14	-0.703531	0.0557061	0	1	1	6999.14	-0.878941	0.0550991	0	1	1
ENSMUSG00000008482.9	46	48	65	51	59	54	49	41	44	41	39	50	32	39	34	24	44.8032	-0.23538	0.212615	0	1	1	44.8032	-0.582951	0.230967	0	1	1
ENSMUSG00000008489.18	2378	2736	2890	2493	3289	3591	3755	3419	2666	2923	3023	2874	2103	2589	2330	2116	2836.29	0.492748	0.0774802	0	1	1	2836.29	-0.397297	0.0778927	0	1	1
ENSMUSG00000008496.19	709.989	752.697	638.757	523.719	1464.59	1436.66	1661.14	1330.16	427.835	351.571	341.965	414.732	540.966	559.548	587.208	420.335	773.106	1.17721	0.149076	1.18873	0.234544	1	773.106	0.169547	0.153003	0	1	1
ENSMUSG00000008540.11	51	61	35	45	84	89	119	85.0001	119	114	95.0001	118	98.0001	95	106	86	86.0815	0.817729	0.211031	0	1	1	86.0815	-0.254638	0.194864	0	1	1
ENSMUSG00000008575.17	1386.91	1457.5	1301.56	1018.86	1694.17	1864.86	1438.1	1440.2	1228.12	1560.8	1639.98	1526.3	1366.23	1791.2	1375.22	1442.09	1466.14	0.178859	0.114097	0	1	1	1466.14	0.096374	0.113979	0	1	1
ENSMUSG00000008590.4	1.00051	2.20919	2	1	2	2.00059	1.00102	2.00071	0	0	3	0	2	1	0	3.45335	1.37765	0.137855	1.19699	0	1	NA	1.37765	0.925485	1.35115	0	1	NA
ENSMUSG00000008601.12	165	213	272	254	206	211	367	391	69	68.0001	79	104	75.9999	108	92	98	166.299	0.00947136	0.241729	0	1	1	166.299	0.0419208	0.257621	0	1	1
ENSMUSG00000008604.11	24923	26813	25069	22642	30608	30552	30416	28673	28472	33189	31584	28870	34629	47657	42222	39220	31463.9	0.241825	0.02666	0	1	1	31463.9	0.411509	0.0265025	0	1	1
ENSMUSG00000008658.16	9	11	15	16	19	23.0001	21.0004	29	8	4	9	4	9	4	7	5	12.6899	0.381466	0.477994	0	1	1	12.6899	0.94999	0.577051	0	1	1
ENSMUSG00000008668.15	110179	123626	108067	98904	124289	117265	127038	115200	101172	106668	107030	100682	110330	145802	133523	118778	115033	0.0270749	0.039495	0	1	1	115033	0.147449	0.0394963	0	1	1
ENSMUSG00000008682.13	52147.4	55462.2	48543.2	41391.3	34853.8	40269.3	42518	37540.6	45511.4	48208.8	49075	45694.4	36324.1	42530.6	41137.6	33293.7	43676.1	-0.484894	0.0650046	0	1	1	43676.1	-0.484542	0.06501	0	1	1
ENSMUSG00000008683.16	61222.3	65398.6	58138.6	53637.7	67052.1	64626.4	71038.3	63747.4	53074.8	57618.9	56600.3	53472.9	58221.7	82084.1	71356.8	66174.5	62329.1	-0.00859275	0.03726	0	1	1	62329.1	0.102239	0.037266	0	1	1
ENSMUSG00000008690.15	16877.9	18020.7	16976.8	15768.4	21271.5	20626	20992.8	19505.2	18460.9	20588.2	18921.6	17931.7	18474.9	23996.2	21085.8	18854.1	19192.8	0.159052	0.0367412	0	1	1	19192.8	0.0515721	0.0366989	0	1	1
ENSMUSG00000008730.17	6055.66	6349	5454	4888.17	6998.33	7683.11	7232.07	7160.13	6775	8959.13	8321	7305.34	7684.1	10678	8404	8154	7327.02	0.241834	0.0586864	0	1	1	7327.02	0.0837915	0.0583743	0	1	1
ENSMUSG00000008734.9	1074.94	1091	1235.95	1193	1890.84	1991.96	1797.79	1599.82	2625.36	3019.61	3132.4	2896.9	3026.88	3924.92	3082.81	2906.73	2232.62	0.48362	0.0940344	0	1	1	2232.62	0.159075	0.0918981	0	1	1
ENSMUSG00000008763.16	4978	5141	5146	4475	4479	5124	4624	4356	4630	5855	5771	5054	3968	5150	4094	4118	4812.92	-0.242898	0.107967	0	1	1	4812.92	-0.0682169	0.10797	0	1	1
ENSMUSG00000008789.10	5	0	2	5	2	3	3	3	0	0	1	1	0	0	1	0	1.68266	-0.260219	1.08083	0	1	NA	1.68266	-0.84622	1.69265	0	1	NA
ENSMUSG00000008822.15	427	531	626	538	647	629	554	521	520	538.999	565	542	564	724	646	628	573.619	0.0641021	0.106412	0	1	1	573.619	0.118829	0.106007	0	1	1
ENSMUSG00000008843.4	5	2	7	4	11	5	19	21	1	0	1	1	1	0	0	1	4.98017	1.53998	0.700903	0.770401	0.441062	1	4.98017	-0.710969	1.42175	0	1	1
ENSMUSG00000008845.9	27.2196	20.3649	28.0573	28.4909	29.0569	34.0841	22.0085	25.0212	1.00642	2.00621	4.01097	0	1.0052	0	2.00812	2.00601	13.9015	-0.0807289	0.359981	0	1	1	13.9015	-0.811826	0.896572	0	1	1
ENSMUSG00000008855.17	4151.19	4637	5198.01	4627.55	9541	9769	9646.99	9112.01	6503.24	7494	7047.19	6398	13080.4	18277.4	14622.7	14409	8886.35	0.912123	0.0543958	0	1	1	8886.35	1.05718	0.0538814	1.06122	0.288589	1
ENSMUSG00000008859.8	4589.01	5250	4954	4345	4441	4441.99	4576	4191	3548	3964	3919	3647	3078.99	4209	3717	3488	4167.36	-0.439751	0.0557833	0	1	1	4167.36	-0.280687	0.0562841	0	1	1
ENSMUSG00000008874.3	0	0	0	0	3	4	3	4	0	0	1	0	4	1	1	0	1.29836	4.15549	1.54708	2.03964	0.0413862	NA	1.29836	2.231	1.60641	0.766305	0.443495	NA
ENSMUSG00000008892.12	11706.5	12535.1	11527	10134.9	8009.11	7909.25	7796.17	7439.22	13296.7	15358.9	14889.8	13251.4	7527.61	10581.6	8357.17	8405.53	10604.9	-0.657605	0.0339319	0	1	1	10604.9	-0.842889	0.033706	0	1	1
ENSMUSG00000008932.9	12.6636	10.2696	12.9977	9.39024	9.64991	12.314	10.8972	6.80068	36.3715	32.2176	18.9279	31.7502	29.5927	38.2894	44.5961	22.3517	20.2084	-0.481127	0.412991	0	1	1	20.2084	0.111075	0.323721	0	1	1
ENSMUSG00000008958.14	4003.79	4514.92	4675.02	4563.36	6514.35	6160.48	6709.79	6161.99	5943.27	6409.09	6370.84	5840.84	5284.03	6957.32	6684.97	5727.12	5764.42	0.430981	0.0730488	0	1	1	5764.42	-0.0996927	0.0728543	0	1	1
ENSMUSG00000008976.16	18129.2	19259.2	16910.2	14920.8	14923.1	16163.8	15388.7	14962.5	15794.1	18313.4	16710.5	15646.2	14798.7	20088.8	16206.8	15339.9	16432.5	-0.232664	0.0306325	0	1	1	16432.5	-0.0822333	0.0306148	0	1	1
ENSMUSG00000008999.7	174.76	168.183	131.917	131.085	150.237	148.826	128.384	134.875	351.779	423.2	278.869	337.122	192.339	292.307	249.725	218.816	217.689	-0.0783846	0.136788	0	1	1	217.689	-0.426579	0.12363	0	1	1
ENSMUSG00000009013.5	21042.4	23223.1	24957.8	23002	21715.2	21067	21816.6	19872.4	20378	22495.8	22589.6	21085.8	17145	22947.1	21187.2	18446.1	21490.6	-0.230109	0.0569266	0	1	1	21490.6	-0.266755	0.0569552	0	1	1
ENSMUSG00000009030.14	4597	4803	3610	3178	3361	3529.01	3412	3235	4478	5077	4354	4173	3209	4366	3857	3756	3935.36	-0.381608	0.0761062	0	1	1	3935.36	-0.283638	0.0759044	0	1	1
ENSMUSG00000009035.15	4849	5170	4312	3891	7086.01	7091	6408.99	5848	7190.99	8475	7358	6741	6787.99	9154.99	7646.01	7028	6496.56	0.488807	0.0574186	0	1	1	6496.56	0.0615116	0.0569368	0	1	1
ENSMUSG00000009070.14	18	14	12	15	35	20	24	23	7	4	3	6	15.0003	15	27	8	14.6977	0.688822	0.376204	0	1	1	14.6977	1.42366	0.472768	0.896128	0.370184	1
ENSMUSG00000009073.16	21503	22494.2	20830.6	18418	18936	19926	20863.3	19154.6	13739	16181.6	16874.7	15416.7	12314.7	15956.6	14318	12809.2	17716.9	-0.218587	0.0550978	0	1	1	17716.9	-0.333566	0.0552785	0	1	1
ENSMUSG00000009075.2	290.421	253.49	204.015	188.708	215.265	241.877	200.953	183.085	213.818	219.054	246.895	217.393	165.352	247.636	210.324	226.688	219.981	-0.24776	0.123369	0	1	1	219.981	-0.20978	0.123679	0	1	1
ENSMUSG00000009076.10	1688.58	1814.51	2044.98	1914.29	1685.73	1608.12	1553.05	1432.91	1513.19	1512.95	1580.1	1456.6	1267.65	1575.37	1532.67	1270.31	1598.84	-0.361634	0.0838643	0	1	1	1598.84	-0.242639	0.0844886	0	1	1
ENSMUSG00000009079.16	33254.3	37196.2	39612.4	34655.7	51183.5	50416.4	52303	48205.4	44373.6	50340.4	50400	46372.3	46862.8	58692.7	54214.7	48351.6	46581.1	0.46381	0.0397444	0	1	1	46581.1	0.247432	0.0396975	0	1	1
ENSMUSG00000009090.17	9294	9846	9931	9004	13222	13174	13618	12561	10898	12450	12090	11123	9883	12544	11013	9624	11224.6	0.322481	0.0386406	0	1	1	11224.6	-0.222191	0.0386309	0	1	1
ENSMUSG00000009092.5	542	589	670	623	2843	2728	3129	2780	900	1015	886.999	867	2277	2930	2545	1923	1663.53	2.12277	0.0911143	12.3227	6.83635e-35	1.20303e-31	1663.53	1.28522	0.0897045	3.17951	0.00147522	0.043328
ENSMUSG00000009093.7	5	7	5	12	2	1	4	1	2	1	0	0	0	2	2	0	2.84167	-1.97233	0.901601	-1.07844	0.280836	1	2.84167	0.250343	1.30645	0	1	1
ENSMUSG00000009097.10	20.0001	21	20	24	41	29.0001	24	20	6	9	15	3	5	14	10	8	16.4388	0.339615	0.354877	0	1	1	16.4388	0.0642396	0.452996	0	1	1
ENSMUSG00000009108.15	568	545	300	270	193	210	200	191	297	280	253	298	180	197	205	175	272.051	-1.03595	0.161912	-0.222025	0.824295	1	272.051	-0.707768	0.164097	0	1	1
ENSMUSG00000009112.4	4761.2	5045.19	4327.28	3969.77	4357.68	4604.25	4627.52	4327.54	6111.52	6941.61	6598.35	6078.22	5386.45	6991.5	6049.46	5667.63	5415.25	-0.190025	0.078544	0	1	1	5415.25	-0.30585	0.0781306	0	1	1
ENSMUSG00000009114.17	15.9077	7.12245	9.26864	5.86269	4.82147	10.1314	3.67009	7.26999	12.1453	4.77825	6.21687	3.81137	3.69901	3.56768	0	1.1685	6.36076	-0.627067	0.613793	0	1	1	6.36076	-1.73355	0.742005	-0.988602	0.322858	1
ENSMUSG00000009115.5	13	3	2	4	5	13	8	5	6	2	6	3	6	6	4	2	5.64811	0.306626	0.700501	0	1	1	5.64811	0.0589653	0.75599	0	1	1
ENSMUSG00000009145.6	315.082	349.023	341.165	326.132	422.489	440.535	353.068	344.718	145.466	167.337	106.493	137.246	138.311	208.531	167.363	160.366	257.766	0.25084	0.116934	0	1	1	257.766	0.301013	0.132846	0	1	1
ENSMUSG00000009207.15	2028	2293	2016	1777	2337	2377	2290.01	2147	2002	2274	1992	1844	2288	2912	2556	2423	2209.48	-0.0479266	0.0543187	0	1	1	2209.48	0.137098	0.0541134	0	1	1
ENSMUSG00000009210.10	0	1	2	0	1	0	0	0	0	1	0	0	4	0	1	0	0.683683	-1.7016	2.42261	-0.289606	0.772117	NA	0.683683	1.93271	2.37007	0.393535	0.693924	NA
ENSMUSG00000009214.9	6	5	3	2	2	3	0	0	0	1	0	1	0	2	0	0	1.51961	-1.70935	1.24033	-0.571904	0.567387	NA	1.51961	-0.109442	1.73081	0	1	NA
ENSMUSG00000009216.7	77	64	26	24	55	60	52	44	217	215	172	169	130	180	173	158	112.473	0.0649686	0.2598	0	1	1	112.473	-0.401827	0.229153	0	1	1
ENSMUSG00000009246.14	140.022	119.712	52.4222	61.947	32.8002	33.5255	38.9316	24.143	112.139	131.715	89.7022	109.94	110.859	191.745	150.985	130.788	90.8979	-1.6198	0.254044	-2.43973	0.0146983	0.519037	90.8979	-0.494677	0.226162	0	1	1
ENSMUSG00000009248.6	601	723	554	447	424	439	439	307	196	174	157	198	252	302	304	254	361.401	-0.538958	0.129617	0	1	1	361.401	0.522256	0.139083	0	1	1
ENSMUSG00000009281.6	7.78121	8.04547	10.7897	9.67122	13.1176	10.3233	11.8733	6.52246	4.57211	6.55516	7.82562	7.81305	5.17752	4.99215	10.9721	26.721	9.7779	-0.542184	0.576984	0	1	1	9.7779	-0.199877	0.586248	0	1	1
ENSMUSG00000009291.13	4188	4568	4686	4309	6597	6633	6514	6191	4377	5186	4721	4467	6739	9655	7407	7305	5755.95	0.392676	0.0545035	0	1	1	5755.95	0.533969	0.0543334	0	1	1
ENSMUSG00000009292.18	736.352	832.768	760.573	702.971	243.38	274.601	210.835	210.073	289.47	278.884	321.214	335.451	118.192	152.823	131.038	85.6772	353.939	-1.77016	0.139102	-5.53663	3.08341e-08	4.17387e-06	353.939	-1.37196	0.149732	-2.48416	0.0129859	0.272587
ENSMUSG00000009293.17	2918.03	3263.09	2954.57	2652.44	3122.43	3010.54	2891.17	2586.98	2901.29	3200.2	2941.6	2977.48	2474.18	3244.53	2694.05	2494.52	2897.16	-0.115138	0.0530053	0	1	1	2897.16	-0.301247	0.0530946	0	1	1
ENSMUSG00000009350.13	9.17021	12.2901	8.04645	13	1.00559	9.01615	13	7.005	11.2896	10	17.2641	9	9.52231	9.20628	8.09119	6.01617	9.88974	-0.833487	0.538652	0	1	1	9.88974	-0.655616	0.529511	0	1	1
ENSMUSG00000009356.12	21	23	31	33	34	29	33	28	29	30	28	32	17	26	30	17	33.1329	1.05328	0.563277	0.0945861	0.924644	1	33.1329	-0.543221	0.569097	0	1	1
ENSMUSG00000009376.15	350	316	369	357	592	710	732	703	210	265	236	209	449	570	423	427	427.175	0.888614	0.192631	0	1	1	427.175	0.467002	0.195534	0	1	1
ENSMUSG00000009378.4	7	6	12	7	7	1	12	4	3	2	1	1	0	3	1	0	4.23854	-0.514648	0.735171	0	1	1	4.23854	-0.987488	1.10651	0	1	1
ENSMUSG00000009394.13	7	4	9	4	8	6	8.00452	2	8	11	4	11	8	16	13	21	8.51014	-0.481692	0.560868	0	1	1	8.51014	0.581279	0.482838	0	1	1
ENSMUSG00000009406.13	2631.12	2924.32	2342.76	2131.97	3579.96	3508.63	3600.6	3419.64	2395.1	2942.15	2749.75	2554.71	3393.17	4398.96	3963.89	3513.62	3099.55	0.407356	0.048951	0	1	1	3099.55	0.400887	0.0487199	0	1	1
ENSMUSG00000009418.15	5777.31	6051.32	6334.58	5658.65	7012.43	7531.62	7632.4	7443.13	14756.5	17720.7	18664.1	16890.4	17206.8	23196.1	20478.8	18270.6	12261.6	0.136759	0.0663608	0	1	1	12261.6	0.0533493	0.0656002	0	1	1
ENSMUSG00000009470.17	36325.3	35659.1	31507.2	27093.1	27119.9	30406.5	28183.2	26986	36625.1	46935.9	45121.6	39451.3	31016.8	40119.7	32524.7	31043.1	33890.3	-0.201312	0.0600077	0	1	1	33890.3	-0.296978	0.0599536	0	1	1
ENSMUSG00000009471.4	7	12	7	7	8	16	16	14	15	3	10	6	11	6	14	12	10.2819	0.619671	0.507318	0	1	1	10.2819	0.217541	0.5135	0	1	1
ENSMUSG00000009487.10	11.3589	6.54808	16.4595	4.04999	11.1483	11.344	14.4041	15.427	11.5252	17.9764	8.38323	15.1161	10.5369	18.5689	13.7703	11.8705	12.6834	0.563788	0.420479	0	1	1	12.6834	0.330063	0.39634	0	1	1
ENSMUSG00000009535.13	15609	16102	13135	11478	11101	11450	11786	11142	13008	14630	14239	13213	10079	13171	11700	10694	12657.1	-0.388317	0.0498786	0	1	1	12657.1	-0.338383	0.049887	0	1	1
ENSMUSG00000009545.14	9	7	11	10	10	19	11	7	26	9	10	7	17	29	19	19	15.8309	0.287902	0.553476	0	1	1	15.8309	-0.0838914	0.526039	0	1	1
ENSMUSG00000009549.14	6628	7299	6433	5982	5506	5330	5176	4802	7191	7970	7360	6949	4815	6177	5534	4711	6140.83	-0.442493	0.0407246	0	1	1	6140.83	-0.608604	0.0406056	0	1	1
ENSMUSG00000009551.2	3	1	3	3	0	0	0	2	2	4	5	1	0	4	0	2	1.88559	-2.25534	1.40016	-0.896567	0.36995	NA	1.88559	-1.30593	1.16589	-0.262401	0.793012	NA
ENSMUSG00000009555.16	7439.73	8338.32	10128.9	9338.78	9868.45	9582.02	9769.41	9045.57	10495.7	11605.9	10365.3	10151.4	6750.28	8896.63	8060.6	7490.57	9225.9	0.00904073	0.0845379	0	1	1	9225.9	-0.547498	0.0845554	0	1	1
ENSMUSG00000009563.16	2080.74	2339.51	1941.53	1826.58	1715.29	1580.33	1589.8	1552.93	2448.17	2771.23	2684.78	2398.88	1618.08	2173.93	1789.57	1839.65	2019.63	-0.302551	0.0463989	0	1	1	2019.63	-0.58963	0.045371	0	1	1
ENSMUSG00000009566.12	9553	10636	11403	10241	7879	7588	8241	7740.01	8684	9413	8851	8643	5415	6667	6410	5717	8369.58	-0.501136	0.0559126	0	1	1	8369.58	-0.646635	0.0561735	0	1	1
ENSMUSG00000009569.14	2243.34	2291.39	1897.17	1657.96	2210.39	2656.01	2864.4	2671.88	2522.51	3257.11	3355.66	2944.83	3099.39	4185.82	3298.26	3285.06	2740.56	0.169678	0.0812459	0	1	1	2740.56	-0.0509823	0.0804047	0	1	1
ENSMUSG00000009575.14	43164	43303.2	38319	32695.6	35310.1	39876.2	36804	35922.1	25900.3	32606.7	32761.1	28898.9	28956	36306.2	30127.6	27453.5	34328	-0.175121	0.0648909	0	1	1	34328	-0.0841352	0.0649445	0	1	1
ENSMUSG00000009585.18	13013.4	13931.4	14456.6	13005.4	13677	13213.5	13246.7	12643.3	13707.4	15652	15762.6	14895	10631.9	14106.6	12726.1	11317.8	13540.7	-0.177404	0.0467638	0	1	1	13540.7	-0.461671	0.0467652	0	1	1
ENSMUSG00000009588.9	2.07975	0	2.1017	3.12835	2.00082	1.01436	5.00274	4.17573	2.04308	0	1.01793	0	5.11751	2.05542	3.03326	3.00137	2.21608	0.660089	0.9955	0	1	NA	2.21608	2.01137	1.17103	0.863662	0.387774	NA
ENSMUSG00000009596.9	314	343	221	248	617.999	652	465	516	194	265	215	203	635	889	599	584	423.058	0.90637	0.127027	0	1	1	423.058	1.42669	0.128485	3.32095	0.000897107	0.0281987
ENSMUSG00000009614.16	54.9999	43.5018	29	31	28	31	30.7508	23	2	6	11	10	3	10	2.071	2.06919	17.1329	0.0626518	0.414799	0	1	1	17.1329	-1.35754	0.601517	-0.594397	0.552246	1
ENSMUSG00000009621.18	2344.91	2548	2586	2342.94	3048	3138	3216	2976.49	2985.89	3321.93	3410.91	3078.78	3364.32	4392	3708	3389.23	3092.42	0.198484	0.0445018	0	1	1	3092.42	0.15245	0.0436392	0	1	1
ENSMUSG00000009628.14	871	864.001	721	649	763	925	859	823	1380	1574	1410	1306	1478	2416	1562	1579	1169.38	0.0345708	0.0843345	0	1	1	1169.38	0.126604	0.0805626	0	1	1
ENSMUSG00000009630.10	7288	7919	7934	7124	6496	6869	6613	6448	7685	8417	8423	7765	6480	8771	7629	7024	7433.86	-0.296424	0.0383766	0	1	1	7433.86	-0.245422	0.0382096	0	1	1
ENSMUSG00000009633.3	94	92	115	93	54	65	65	55	765	1011	904	681	844	1389	941	1048	501.112	-0.829223	0.158185	0	1	1	501.112	0.185773	0.110213	0	1	1
ENSMUSG00000009640.11	3598	3922	3787	3617	4112	4046	4130	3691	3843	4255	4171	3910	4157.99	5620	5132	4690	4149.09	-0.00467565	0.0443987	0	1	1	4149.09	0.135372	0.0440159	0	1	1
ENSMUSG00000009646.13	24	27	15	22.9999	2	6	4	1	4	3	0	2	1	0	0	0	7.28483	-2.98284	0.623038	-3.18253	0.00145993	0.0732287	7.28483	-2.83313	1.21471	-1.50911	0.13127	1
ENSMUSG00000009647.13	1544.62	1756.94	1653.58	1449.41	1710.76	1662.07	1871.23	1802.42	896.918	1087.75	1072.94	1038.19	1090.36	1485.75	1269.82	1192.6	1410.32	0.052907	0.0572	0	1	1	1410.32	0.190753	0.0598117	0	1	1
ENSMUSG00000009654.4	0	3	0	0	0	2	0	1	0	0	2	1	0	2	1	0	0.714891	-0.0209563	2.10966	0	1	NA	0.714891	-0.229686	2.11403	0	1	NA
ENSMUSG00000009670.11	894	897	683	522.001	987	1020	918.001	840	998	1072	805	877	984	1115	1061	930.999	907.264	0.211044	0.122982	0	1	1	907.264	0.00766376	0.122205	0	1	1
ENSMUSG00000009681.10	3706	4212	4259	3782	5482	5891	6114	5899	3712	4263	4651	4225	5539	7139	6300	5649	5001.86	0.307647	0.0682306	0	1	1	5001.86	0.430178	0.0681507	0	1	1
ENSMUSG00000009687.14	210.863	215.68	255.926	245.331	86.7356	70.2589	87.1927	82.8244	93.377	96.0314	76.7995	75.8894	14.5926	28.3699	31.93	29.8042	115.891	-1.77824	0.192817	-4.03618	5.43289e-05	0.00392898	115.891	-2.1936	0.233585	-5.10993	3.22279e-07	2.05606e-05
ENSMUSG00000009731.4	1207	1228.51	853.721	690.069	806.001	787.131	855.408	837.114	958.143	1125.14	984.212	966.828	1098.67	1163.83	1088.98	1064.9	980.166	-0.338529	0.118173	0	1	1	980.166	0.0640525	0.117418	0	1	1
ENSMUSG00000009733.9	1025.46	1046.59	1229.56	1101.36	2543.53	2752.81	2388.64	2269.68	1549.46	1884.16	1685.67	1473.71	3049.7	4445.62	3376.33	3517.39	2167.79	1.02542	0.0844768	0.3009	0.763491	1	2167.79	0.981041	0.0831756	0	1	1
ENSMUSG00000009734.18	13.058	28.0068	15.0361	14.1499	11.0025	15.0163	14.0038	19	5.00716	11.0115	6.07118	8	5.00889	6	1	2	13.4277	-0.532715	0.428137	0	1	1	13.4277	-1.31317	0.591963	-0.529038	0.596779	1
ENSMUSG00000009739.17	981.22	1093.6	825.383	674.333	733.209	762.28	698.673	733.819	3121.43	3640.77	3685.77	3131.15	1422.48	2260.04	1764.24	1928.12	1669.72	-0.129036	0.0939823	0	1	1	1669.72	-0.78942	0.0892829	0	1	1
ENSMUSG00000009741.15	10797.2	11662.4	10318.5	8962.3	11610.4	11836.4	11843.4	10966.1	11099.8	13301.7	12280.1	11145.5	10623.8	14684.7	12576.9	12213.2	11564.7	0.0633447	0.0417923	0	1	1	11564.7	0.0401703	0.0416784	0	1	1
ENSMUSG00000009772.15	503	465	348.976	299	813	794.988	766	721	2243	2669.93	2100	1786.99	2051	2718	2276	2067	1388.92	0.829734	0.115182	0	1	1	1388.92	-0.0165142	0.108447	0	1	1
ENSMUSG00000009828.15	1061.05	1057.06	1026.03	909.095	1713.12	1780	1703.07	1617.16	2107.02	2356.03	2354.72	2064.05	2168.01	3048.21	2746.27	2447.07	1837.19	0.491535	0.0491304	0	1	1	1837.19	0.00905976	0.0450583	0	1	1
ENSMUSG00000009863.14	7227	7553	7604	6924	8044	7656	7791	7176	9195	10024	10050	9012	7781	10235	9669	8205	8367.71	-0.0437459	0.0456237	0	1	1	8367.71	-0.230639	0.045338	0	1	1
ENSMUSG00000009876.13	87	87	73	60	24	22	40	36	214	215	148	142	31	39	45	27	82.2892	-1.42974	0.239523	-1.79417	0.0727865	1	82.2892	-2.48642	0.226183	-6.57175	4.97281e-11	5.96653e-09
ENSMUSG00000009894.15	6129.35	6153	5450	4842	6831	6456	6323	5786	7211	7974	8277	7415	6687	8716	7877	6876	6781.07	0.0929002	0.0473221	0	1	1	6781.07	-0.163899	0.0469247	0	1	1
ENSMUSG00000009900.7	55	33	70	80	85	54	84	79	29	33	63	31	66	162	78	114	68.6462	0.224289	0.322285	0	1	1	68.6462	1.27868	0.326949	0.85237	0.394009	1
ENSMUSG00000009905.5	2337.37	2495.51	2187.48	1876.38	3502.16	3728.02	3417.04	3272.31	4029.13	4744.68	4412.01	3940.57	4717.93	6095.52	5346.27	5099.98	3812.85	0.532893	0.0745644	0	1	1	3812.85	0.423094	0.0734509	0	1	1
ENSMUSG00000009907.17	9831.99	10514	9864	8649	8888.99	9201.99	9013.95	8425	13898	15749.9	15309.9	14207	12420	17046	14065.2	13319	11866	-0.247897	0.035404	0	1	1	11866	-0.131878	0.0348333	0	1	1
ENSMUSG00000009927.9	64106.1	69744.1	62072.5	55732.5	63596.2	61657.9	66735.1	59191.1	54338.8	59140.1	59462.1	55569.9	53991.1	73102.9	67349.7	58894.5	61381.7	-0.083815	0.0369902	0	1	1	61381.7	0.0253989	0.0370014	0	1	1
ENSMUSG00000009941.10	32	43	36	46	146	129	97	85	12	21	18	22	31	38	30	24	50.8077	1.51669	0.240661	2.14696	0.0317964	0.978781	50.8077	0.6316	0.292816	0	1	1
ENSMUSG00000009995.17	951.647	974.89	1191.55	999.98	2069.68	1999.83	2018.98	1886.97	1191.79	1437.42	1311.66	1051.14	1771.53	2588.9	2187.26	2260.86	1602.25	0.894625	0.0837533	0	1	1	1602.25	0.754152	0.0831096	0	1	1
ENSMUSG00000010021.13	56	83	78	81	48.9999	47	39	57	175	157	107	129	68.0001	119	94	96	89.7278	-0.605812	0.215658	0	1	1	89.7278	-0.661691	0.195046	0	1	1
ENSMUSG00000010025.19	1949	2056	2161	1961	2847	2916	2847	2601	4032	5480	4803	4158	3851	5753	4122	4298	3470.87	0.438143	0.0792929	0	1	1	3470.87	-0.0740817	0.0779459	0	1	1
ENSMUSG00000010044.12	14	13	18	8	19	21	28	25	11	25	23	10	32	42	44	28	22.928	0.853978	0.389064	0	1	1	22.928	0.891013	0.367249	0	1	1
ENSMUSG00000010045.2	2320	2591	2307	2080	3198	3071	2800	2707	2747	3137	3122	2652	2815	4067	3383	3219	2866.41	0.245256	0.0500714	0	1	1	2866.41	0.0772525	0.0494035	0	1	1
ENSMUSG00000010047.12	3205	3594	3397	3048	4009	3931	3934	3764	4100	4580	4578	4089	3757	4809	4346	3741	3917.72	0.143419	0.0402736	0	1	1	3917.72	-0.143426	0.0397147	0	1	1
ENSMUSG00000010048.10	7358.01	8259	9637.01	8985	10938	10881	12057	10729	9464	10014	10396	9843	7504	9847.01	9685	8241	9583.93	0.232476	0.0679951	0	1	1	9583.93	-0.20967	0.0680273	0	1	1
ENSMUSG00000010051.15	717.787	711.862	328.723	320.914	415.446	456.234	457.797	375.939	559.201	774.431	567.324	587.925	623.099	1114.3	798.984	903.674	598.209	-0.368413	0.195636	0	1	1	598.209	0.336465	0.193613	0	1	1
ENSMUSG00000010054.4	2116	2331	2038	1907	3009	2779	2859	2580	2173	2461	2390	2193	2102	2773	2449	2232	2388.39	0.302141	0.0436979	0	1	1	2388.39	-0.0270966	0.0438307	0	1	1
ENSMUSG00000010057.8	1199.02	1446.01	1385.02	1227	1760.01	1794.03	1740.02	1558.08	1425.03	1604.01	1597	1304	1512.02	2113.9	2012.01	1690	1571.92	0.237789	0.0599009	0	1	1	1571.92	0.166602	0.0593821	0	1	1
ENSMUSG00000010064.15	186	166	145	144	243	243	276	254	312	323	270	310	200	250	221	195	234.428	0.517922	0.140626	0	1	1	234.428	-0.671677	0.136471	0	1	1
ENSMUSG00000010066.15	264.009	295.03	356.738	318.025	711.023	743.126	692.001	576.699	846.001	927.001	988.027	943	1045	1338	1187	1119.04	770.899	1.04533	0.142998	0.316987	0.751254	1	770.899	0.212529	0.137904	0	1	1
ENSMUSG00000010067.13	1545.3	1664.1	1669.64	1484.74	2506.79	2460.81	2258.27	2126.72	1805.51	1982.54	1919.33	1783.48	2119.35	3389.92	2510.57	2774.75	2099.98	0.4255	0.0695829	0	1	1	2099.98	0.377678	0.0690296	0	1	1
ENSMUSG00000010080.15	28	23	31	39	8	40	45	32	12	12	7	12	20	20.0001	15	15	24.4544	-0.0244019	0.531083	0	1	1	24.4544	1.11772	0.573387	0.205313	0.837328	1
ENSMUSG00000010086.17	49	64	80	70	41	54	31	31	40	34.0001	32	64	63	60.9999	68	48	52.3735	-0.961926	0.271277	0	1	1	52.3735	0.323493	0.270444	0	1	1
ENSMUSG00000010095.13	23934.2	25660.4	22731.8	20121.3	18045.5	17548.3	18768.7	17187.1	33832.3	40786.3	38290.4	33706.7	30109.1	45362.3	34526.7	35969.2	28189	-0.557851	0.0580465	0	1	1	28189	-0.115436	0.0578482	0	1	1
ENSMUSG00000010097.15	19636.9	20495	17742	15902	18739	18564	18952	17598	15012	17278	16091	15236	15084	19996	18327	16572	17543	-0.167253	0.0363863	0	1	1	17543	-0.0575517	0.0364721	0	1	1
ENSMUSG00000010110.17	3345.71	3697.29	3372.02	3106.9	6027.73	5834.47	5610.87	5341.54	3910	4699.37	4126.65	3796.71	5646.62	7767.1	6366.97	6145.4	4878.33	0.667933	0.0502927	0	1	1	4878.33	0.595003	0.0499121	0	1	1
ENSMUSG00000010122.14	1843.5	1944.49	1757.48	1453.95	2947.18	2947.78	2513	2259.77	2305	2633.58	2798.27	2557	2977.33	3489.53	3475.18	3046.83	2553.23	0.598512	0.0738102	0	1	1	2553.23	0.321776	0.0729156	0	1	1
ENSMUSG00000010136.14	28.0001	42	41	35	9	11	18	15	13	13	12	14	3	4	3	4	17.0459	-1.55947	0.334856	-1.67077	0.094768	1	17.0459	-1.99927	0.497457	-2.00876	0.0445631	0.735762
ENSMUSG00000010142.12	30	37.9999	46.0001	45	48	45.9999	37	49	143	188	157	135	74	117	56	89	80.9693	-0.218778	0.328419	0	1	1	80.9693	-1.09209	0.305627	-0.301306	0.763181	1
ENSMUSG00000010154.7	1238	1541	1595	1522	2891	2827	3094	2886	2401	2604	2633	2369	2792	3391	3161	2631	2452.21	0.886365	0.083228	0	1	1	2452.21	0.131565	0.0823405	0	1	1
ENSMUSG00000010175.13	23	32	31.0001	34	37	53.0001	43	44	27	44	34	34	44	31.9999	47	36.0001	37.9911	0.475777	0.325196	0	1	1	37.9911	0.119791	0.323098	0	1	1
ENSMUSG00000010205.11	19106.1	19922.8	22030.1	20465.5	20774.8	21044.2	21335.5	20459.1	19314.3	22447.7	22256.9	20439.1	14676.3	18254.9	16802.7	15044.2	19722.5	-0.0647062	0.0624921	0	1	1	19722.5	-0.507388	0.0625459	0	1	1
ENSMUSG00000010277.7	35979	36112	35822	32110	39463	41605	39725	36824	49077	60375	57539	51194	41463	55783	46125	44502	43685.7	0.0846473	0.0306504	0	1	1	43685.7	-0.267611	0.0305308	0	1	1
ENSMUSG00000010290.7	2957	3126	2576	2343	3044	3177	2908	2726	4040	4499	4014	3701	3610	4618	3950	3644	3416.68	0.0159136	0.0534116	0	1	1	3416.68	-0.166146	0.0524192	0	1	1
ENSMUSG00000010307.7	102	111	62	86	297	286	278	221	123	137	109	91	193	241	225	193	170.641	1.52668	0.161374	3.26371	0.00109964	0.0569146	170.641	0.815585	0.159171	0	1	1
ENSMUSG00000010311.15	9.4634	9.20122	9	8	13	8	7	6	19	22	32.0737	27	14	21	24	28.0001	16.3932	-0.196622	0.451686	0	1	1	16.3932	-0.2831	0.357022	0	1	1
ENSMUSG00000010342.16	2499.84	2580.94	1738.4	1466.06	4708.84	4919.78	4202.73	3828.69	4249.15	4971.9	4625.31	4127.24	7408.05	10817.7	8384.46	8410.46	4787.97	0.917985	0.120335	0	1	1	4787.97	0.814233	0.119523	0	1	1
ENSMUSG00000010358.13	172	181	276	225	42	49.9999	57	39	154	168	165	151	15	18	13	20.9999	112.253	-2.25919	0.201648	-6.24452	4.25097e-10	8.08719e-08	112.253	-3.3605	0.24801	-9.51777	1.76941e-21	5.33782e-19
ENSMUSG00000010362.9	5770	5958	6178	5640	4421	4072	5600	5153	3733	3960.99	3567	3402	2884	3388	2793	2543	4347.03	-0.40867	0.0957032	0	1	1	4347.03	-0.42188	0.0963621	0	1	1
ENSMUSG00000010376.15	6220.87	7087.83	6591.77	5815.81	3729.92	3672.89	3747.89	3475.84	10573.7	11563.6	11249.7	10598.7	4758.56	6065.81	5684.82	4877.77	6661.51	-0.913582	0.0395059	0	1	1	6661.51	-1.16602	0.0385059	-4.31142	1.62213e-05	0.000764295
ENSMUSG00000010392.8	3372	3562	3404	2903	3318	3534	3253	3241	2483	3010	3017	2638	3084	4334	3593	3323	3257.9	-0.341939	0.0829834	0	1	1	3257.9	-0.022061	0.0831048	0	1	1
ENSMUSG00000010406.12	1906	2115	2033	1784	1791	1628	1702	1566	3497	3881	3665	3656	2928	4488	3993	3601	2748.4	-0.326337	0.0612772	0	1	1	2748.4	-0.117525	0.0588179	0	1	1
ENSMUSG00000010435.7	3	1	0	1	0	3	1	1	0	0	1	1	2	1	0	2	1.05146	-0.140691	1.38615	0	1	NA	1.05146	1.16529	1.58183	0.104495	0.916777	NA
ENSMUSG00000010453.12	4784.43	4858.04	4524.33	4145.22	7416.24	7235.26	7045.9	6607.13	9877.41	11426	10823.1	9970.19	12019	16328.4	13529	13173.2	8949.77	0.596621	0.0454252	0	1	1	8949.77	0.42243	0.044311	0	1	1
ENSMUSG00000010461.15	59.5087	72.3424	61.7825	40.826	48.3435	29.9006	31.2038	33.5507	25.6626	40.6656	45.8184	27.5536	31.415	41.9122	46.6577	43.5407	42.8256	-0.913416	0.236199	0	1	1	42.8256	-0.0404018	0.24513	0	1	1
ENSMUSG00000010476.14	47.0146	46.0114	49	32	52	44.0098	40.0092	46.0261	29	42.0001	25	29	24	38.0015	34	24	38.0914	-0.0547784	0.2644	0	1	1	38.0914	-0.109355	0.284638	0	1	1
ENSMUSG00000010505.16	14.1044	21.0152	21	19.034	11.0215	19.0156	6.00403	8.0257	1	6.03083	9.01567	9	1	13.0272	2	8.01203	11.7068	-0.72334	0.668866	0	1	1	11.7068	1.01686	0.744746	0.0226401	0.981937	1
ENSMUSG00000010517.7	15495.5	16269.4	14203.3	12673.3	11486.4	11616.9	12056	11135.8	9171	10162	10215	9705	9259.99	12364	10401	10097	11662.7	-0.437211	0.0387287	0	1	1	11662.7	-0.00619434	0.0390161	0	1	1
ENSMUSG00000010529.6	23	11	27	18	43	28	15	21	43	70	57	57	36	81	49	68	39.8109	0.32954	0.348081	0	1	1	39.8109	-0.100442	0.306122	0	1	1
ENSMUSG00000010538.14	501.744	481.988	542.58	484.676	966.768	854.792	908.16	733.598	260.293	296.697	343.247	310.444	434.809	542.076	465.068	412.082	530.665	0.671302	0.0990959	0	1	1	530.665	0.465101	0.105055	0	1	1
ENSMUSG00000010554.14	18696.9	20643.8	15773.3	13848.3	9222.11	9482.53	9343.08	8819.86	10630.2	11796.4	11891.7	10937.6	8534.64	10485.3	9646.97	8408.02	11796.5	-1.00076	0.0740567	-0.0103051	0.991778	1	11796.5	-0.274385	0.0741639	0	1	1
ENSMUSG00000010592.9	1328	1358	1185	962	2495	2792	1754	1907	283	262	236	270	1000	1224	921	859	1172.5	0.84985	0.131293	0	1	1	1172.5	1.8849	0.138071	6.40899	1.46491e-10	1.63674e-08
ENSMUSG00000010601.14	16	4	5	6.00013	1	2.00003	2.00808	4.00124	8.00002	15	8	9.00003	0	3.00027	5	4.0001	5.3919	-1.27138	0.786389	-0.3451	0.730019	1	5.3919	-1.26301	0.743821	-0.353592	0.723645	1
ENSMUSG00000010607.8	611	688	715	663	837	796	772	790	928	1124	882	881	822	1388	1123	1021	869.84	0.142188	0.0914239	0	1	1	869.84	0.0391931	0.0892352	0	1	1
ENSMUSG00000010608.15	34351.2	38416.1	32846.6	28051.5	35374.8	37857.1	36718.1	34489	33038	36072.5	33683.6	32484.4	29884.6	38765.5	34987.5	32825.4	34309.9	0.083922	0.0352227	0	1	1	34309.9	-0.149815	0.035232	0	1	1
ENSMUSG00000010609.15	290.033	281.068	300.083	271	737	753	725	689	714	917	805	684.051	1358	1908	1683	1670	839.461	1.19851	0.0854269	2.32379	0.0201366	0.664413	839.461	0.990279	0.0757848	0	1	1
ENSMUSG00000010651.4	191.334	202.981	154.526	135.594	147.728	144.512	151.921	118.838	401.769	422.538	324.034	303.67	166.478	261.805	176.261	166.353	217.29	-0.386467	0.157006	0	1	1	217.29	-1.06101	0.148566	-0.410636	0.681339	1
ENSMUSG00000010660.3	1325	1479.9	1853	1605	1893	1876	1660	1615	1255	1210	1098	1194	686	707	851	624	1308.98	0.0778103	0.11371	0	1	1	1308.98	-0.76294	0.116062	0	1	1
ENSMUSG00000010663.5	3121	3224	3415	2848	4909	4951	4292	4110	8446	9916	8583	7902	7975	11133	9035	8868	6356.66	0.478608	0.0480988	0	1	1	6356.66	0.00629247	0.0463746	0	1	1
ENSMUSG00000010721.15	776	775.999	990	825.174	1473.24	1545	1499	1452	1019	1235	1145.24	1068	1300	1682	1429	1296.56	1209.29	0.608721	0.126314	0	1	1	1209.29	0.228799	0.125801	0	1	1
ENSMUSG00000010751.15	3368.37	3483.16	2574.02	2324.26	2913.75	3244.8	2489.69	2468.61	2896.12	2979.69	2813.69	2662	1956.39	2503.98	2260.47	2155.68	2740.61	-0.171642	0.102938	0	1	1	2740.61	-0.493141	0.103197	0	1	1
ENSMUSG00000010755.17	19261	20197.2	13079.3	11243	7060	6888	7202	6402	25405.8	31480.1	29528.1	25082.6	24861.5	39779.4	30372.7	32951.3	20297.2	-1.22511	0.121023	-1.86007	0.0628757	1	20297.2	0.119748	0.120719	0	1	1
ENSMUSG00000010760.5	7370	8237	5874	5140	1720	1578	2004	1755	2159	1829	1988	2230	533	502	638	477	2809.9	-1.99136	0.134007	-7.39778	1.38482e-13	4.6418e-11	2809.9	-2.01634	0.137135	-7.41122	1.25143e-13	1.91497e-11
ENSMUSG00000010796.11	24	26	19	21	32	28	33	25	1	4	2	1	0	0	0	1	12.4203	0.137585	0.343985	0	1	1	12.4203	-3.26161	1.17656	-1.92223	0.0545771	0.869815
ENSMUSG00000010797.6	0	0	2	2	5	2	0	1	3	3	3	1	3	0	2	0	1.72013	0.861435	1.34246	0	1	NA	1.72013	-1.06144	1.28223	-0.0479161	0.961783	NA
ENSMUSG00000010803.13	68	98	75	78	62	77.0001	27	46	1	1	0	1	6	3	1	5	33.7644	-0.564865	0.528433	0	1	1	33.7644	1.80081	1.00866	0.793937	0.427232	1
ENSMUSG00000010825.17	150	165	189	188	401.001	469	417	424	70	94	87	79.9999	491	786	533	577	315.587	1.34432	0.126166	2.72912	0.00635028	0.258878	315.587	2.74821	0.137447	12.7192	4.62803e-37	4.44228e-34
ENSMUSG00000010830.8	654	661	581	512	1264	1331	903	933	3059	3293	2800	2531	1728	2571	2057	2138	1675.42	0.780909	0.110888	0	1	1	1675.42	-0.597392	0.106689	0	1	1
ENSMUSG00000010841.13	1	0	0	0	1	1	1	1	3	0	1	1	1	2	4	4	1.46766	1.93229	1.52782	0.610207	0.541725	NA	1.46766	0.696623	1.20109	0	1	NA
ENSMUSG00000010911.12	1576	1630	1491	1233	1327	1277	1225	1015	1369	1650	1592	1387	1390	1986	1715	1541	1456.96	-0.438858	0.0694311	0	1	1	1456.96	-0.0167478	0.0685777	0	1	1
ENSMUSG00000010914.10	4726.69	5263.2	4358.16	4055.94	4024.4	4033.36	3892.75	3615.26	3991.09	4752.33	4572.83	3954.81	3557.3	4856.03	4132.4	3848.89	4226.17	-0.371595	0.0558536	0	1	1	4226.17	-0.129952	0.0558675	0	1	1
ENSMUSG00000010936.11	7871.89	8162.17	8850.08	8208.26	8385.95	8453.83	9228.57	8537.08	8036.22	9250.44	9443.84	8582.5	6808.55	8369.63	8098.33	7091.2	8357.41	-0.0282094	0.07046	0	1	1	8357.41	-0.358351	0.070497	0	1	1
ENSMUSG00000011008.13	9	4	4	3	6	3	5	6	2	4	4	3	2	4	1	1	3.89627	0.277325	0.674265	0	1	1	3.89627	-0.727622	0.820631	0	1	1
ENSMUSG00000011034.6	883	857	705	575	224	271	294	284	153	171	176	160	156	134	129	94	335.335	-1.57712	0.140327	-4.11265	3.91145e-05	0.00288805	335.335	-0.47948	0.155791	0	1	1
ENSMUSG00000011096.17	3188	3623	4206	3899	4042.71	4213.38	4275	3953	3255	3652	4305.99	3978.27	4256.27	5793.99	5057	4645.31	4134.03	0.194152	0.0808563	0	1	1	4134.03	0.342606	0.080719	0	1	1
ENSMUSG00000011114.18	9690.11	10379.4	10549.9	9975.42	12859.8	13021.3	12589.4	11669.1	15984.5	17564.2	16059.4	15489.4	13361.2	18509.6	15672.9	13926	13516.1	0.206399	0.0488536	0	1	1	13516.1	-0.201553	0.0485813	0	1	1
ENSMUSG00000011148.14	82	83	71	78	104	120	101	105	260	254	234	179	213	317	252	208	163.365	0.338183	0.160399	0	1	1	163.365	0.0453931	0.136475	0	1	1
ENSMUSG00000011154.17	25.0203	39	42	46	9.00001	12	20	15	6	15	13	15	8	15	7.02533	11	19.2332	-1.30669	0.366052	-0.837824	0.402129	1	19.2332	-0.32726	0.421218	0	1	1
ENSMUSG00000011158.8	2615	2821	2607	2205	3960	4188	3974	3684.01	2587	2979	2790	2648	3778.01	4967	4363	4137	3374.85	0.614377	0.0340666	0	1	1	3374.85	0.599192	0.0337028	0	1	1
ENSMUSG00000011171.11	7.06878	13.0219	21.0968	14.0701	7.00476	7.2444	13.0868	3.00352	2.00241	2	3.01101	2.00391	1.25913	2.33265	0	2	8.53049	-2.04746	0.718414	-1.45802	0.144835	1	8.53049	-1.49482	1.01534	-0.487343	0.626015	1
ENSMUSG00000011179.8	93756.7	102161	102680	93747.7	74629.3	73428.6	77376.2	69965.1	80079.7	87501.4	89021	83235.5	44215	55084.4	51005.1	43888	76979.7	-0.505491	0.0451137	0	1	1	76979.7	-0.906906	0.0451645	0	1	1
ENSMUSG00000011254.16	3929.34	4324.56	4723.74	4173.86	3428.74	3297.53	3740.58	3491.56	3466.62	4038.74	4096.76	3897.82	2785.76	3686.61	3420.79	3133.4	3732.45	-0.36671	0.0704319	0	1	1	3732.45	-0.268675	0.0706087	0	1	1
ENSMUSG00000011256.16	3798.6	4201	5239.48	4847.73	6546.05	6639.59	8090.56	6916.1	3419.53	3658.71	3792.65	4063.87	3423.61	4129.01	4163.06	3233.65	4762.08	0.51007	0.113714	0	1	1	4762.08	-0.131036	0.114115	0	1	1
ENSMUSG00000011257.19	42114.6	45967.4	55505.2	49951.3	32840.2	32611.1	35366.2	32282.7	62963.2	66650.3	65557	63088.9	31459	38889.6	36420.8	32021.8	45444.6	-0.589882	0.0863967	0	1	1	45444.6	-0.963546	0.0863782	0	1	1
ENSMUSG00000011263.16	201	172	384	332	112	113	184	176	33	45	44	57	28	36	33	39	128.35	-1.04129	0.295209	-0.139876	0.888758	1	128.35	-0.63414	0.32954	0	1	1
ENSMUSG00000011267.8	9281.07	10303	8180.78	7125.35	10274.4	10004.7	7664.81	7198.89	6481.96	7346.52	6597.73	5821.49	7890.92	10649	9697.26	8537.94	8264.26	-0.0856435	0.0935594	0	1	1	8264.26	0.352227	0.0936515	0	1	1
ENSMUSG00000011305.11	101.847	95.3841	153.814	145.134	197.522	180.864	228.513	186.736	118	131.339	163.421	118.453	154	184.221	149.696	174.034	154.73	0.568902	0.178795	0	1	1	154.73	0.198239	0.179667	0	1	1
ENSMUSG00000011306.7	4931.01	5534	6007.99	5287	7241	6973	7275.99	7008.01	6460	7393	7450.99	6806	7442.99	10073	9261	8507	7056.4	0.295494	0.0631168	0	1	1	7056.4	0.20791	0.0628397	0	1	1
ENSMUSG00000011349.5	91	80	84	75	161	161	210	165	132	108	101	89	147	182	163	145	129.533	0.979779	0.151148	0	1	1	129.533	0.432289	0.14719	0	1	1
ENSMUSG00000011382.8	2221.51	2272.36	2364.85	1948.38	1730.19	1872.2	1817.46	1719.43	1201.04	1400.57	1360.5	1405.46	1358.12	1719.19	1473.38	1302.97	1697.13	-0.337477	0.0627654	0	1	1	1697.13	0.0286803	0.0644683	0	1	1
ENSMUSG00000011427.16	889	954.001	782	671	1023	1068	886	841	1053	1218	1073	930.999	1150	1597	1236	1104	1023.12	0.0805485	0.0937242	0	1	1	1023.12	0.155032	0.0922167	0	1	1
ENSMUSG00000011463.5	11.146	11.0875	3.02027	5	8.02611	5.00689	9.0257	1.00506	4	11	4.00327	9.02341	6.0057	7.00218	4.01195	3.00121	6.33051	-0.394208	0.646027	0	1	1	6.33051	-0.571666	0.660007	0	1	1
ENSMUSG00000011486.14	34	38	33	28	15	16	20	11	73	57	53	44	8	10	22.9999	10	29.8652	-1.17347	0.320643	-0.540997	0.588509	1	29.8652	-2.24067	0.321823	-3.85514	0.000115662	0.00456531
ENSMUSG00000011589.9	1902	2112	2009	1825	1521	1639	1723	1558	2927	3167	2978	2621	2519	3408	3236	2791	2355.85	-0.274318	0.0581656	0	1	1	2355.85	-0.0670582	0.0561156	0	1	1
ENSMUSG00000011632.7	16	16	12	10	11	5	2	3	4	3	5	7	5	4	1	0	6.62947	-1.46003	0.612131	-0.75153	0.452334	1	6.62947	-1.07205	0.744627	-0.0967648	0.922913	1
ENSMUSG00000011658.16	1380.57	1496.02	1692.22	1494.85	1978.33	1800.13	2009.69	1742.35	1064.07	1101.6	1085.97	927.765	1169.76	1520.59	1395.22	1305.28	1450.84	0.143979	0.0916674	0	1	1	1450.84	0.126584	0.093122	0	1	1
ENSMUSG00000011751.16	3963.83	4265.72	4303.63	3647.36	2822.73	2845.89	3190.92	2975.99	2264.92	2238.83	2271.93	2159	2135	2948.95	2566.95	2496.61	2996.85	-0.646648	0.0534122	0	1	1	2996.85	0.0471186	0.0546641	0	1	1
ENSMUSG00000011752.7	121610	131129	112154	102278	61567.1	58316.7	59855.8	55408.1	117746	126198	113280	110057	47468.6	58573.2	55370.2	48240.6	87312.7	-1.08365	0.047863	-1.74763	0.0805283	1	87312.7	-1.28343	0.0478748	-5.92019	3.21577e-09	2.88968e-07
ENSMUSG00000011831.16	5324.99	5709	5306.99	4655.99	5474.97	6204	5675.98	5429.98	6494.99	7826.99	7444.99	6618	6453.94	8912.98	6758.98	6502.99	6270.84	-0.0351113	0.0522329	0	1	1	6270.84	-0.109043	0.0518114	0	1	1
ENSMUSG00000011832.15	374.891	411.001	362	303.664	1054.09	1062.42	1043.8	979.273	384.746	414.481	414.82	396	732.385	1042.99	841.644	856.073	638.716	1.03886	0.0820009	0.473926	0.635553	1	638.716	0.952535	0.0817398	0	1	1
ENSMUSG00000011837.4	1088	1159	1125	1052	1330	1296.99	1188	1110.99	1492	1748	1527	1415.99	1207	1563.99	1347	1154	1298.21	0.0478989	0.0597256	0	1	1	1298.21	-0.376329	0.0583872	0	1	1
ENSMUSG00000011877.13	9475	10320	10178	9311.01	16953	16582	17463	16054	15661	17900	18314	16944	20382	27923	25938	24261	16873.1	0.645591	0.0443828	0	1	1	16873.1	0.400899	0.0440156	0	1	1
ENSMUSG00000011884.13	2938	3279	3433	3151.91	2903	2772	2988	2633.81	3726	4157	4069	3688	2217.76	3082	2863	2456	3159.82	-0.282239	0.0620082	0	1	1	3159.82	-0.689761	0.0618845	0	1	1
ENSMUSG00000011958.17	3534	3906	2924	2413	3370	3556	3089	2868	3050	3668	3354	3081	2911	3751	3138	2943	3206.23	0.0812609	0.0715764	0	1	1	3206.23	-0.0356245	0.0715528	0	1	1
ENSMUSG00000011960.12	11842.4	12603.9	10415.7	8981.66	10042.6	11561.2	9741.1	9071.1	8375.7	9913.77	8882.18	7713.32	8269.01	10901.4	8863.58	8487.09	9682.56	-0.13086	0.0615685	0	1	1	9682.56	0.162317	0.0617141	0	1	1
ENSMUSG00000012017.4	81	98	107	60	262	300	239	213	47	60.0001	88.9999	62	246	420.999	339	354	176.415	1.4677	0.184823	2.53053	0.011389	0.422673	176.415	2.04992	0.189654	5.53599	3.09469e-08	2.36778e-06
ENSMUSG00000012042.8	26	29	43	26	38	30.0001	16	18	1	1	0	2	2	0	1	1	14.4355	-0.605021	0.482962	0	1	1	14.4355	0.922563	1.08669	0	1	1
ENSMUSG00000012076.8	1696.26	1851.49	1973.58	1763.54	2015.04	2199.76	2329.2	2164.58	2316.97	2597.67	2604.74	2318.14	2290.57	3101.83	2578.35	2488.74	2253.18	-0.211898	0.0818227	0	1	1	2253.18	-0.0710405	0.0811419	0	1	1
ENSMUSG00000012114.17	4973.91	5630.49	5587.39	4984.15	6105.05	6442.79	6631.22	5915.59	5308.5	5923.05	5951.01	5495.09	6482.09	8705.14	7602.55	7062.37	6135.4	0.109732	0.0424512	0	1	1	6135.4	0.298913	0.0422265	0	1	1
ENSMUSG00000012117.13	1955.07	1903	1850.76	1623.01	2310	2349.52	2243.03	2108	2425.25	2722	2746.84	2335.03	2171	3016.11	2643.43	2330	2278.18	0.165748	0.0644424	0	1	1	2278.18	-0.179078	0.0636195	0	1	1
ENSMUSG00000012123.17	788.742	752.775	858.217	799.948	1292.71	1204.67	1311.53	1193.48	2310.59	2824.98	2456.01	2178.35	1022.95	1444.63	1266.06	1268.23	1367.42	0.26439	0.0892144	0	1	1	1367.42	-0.439644	0.0867671	0	1	1
ENSMUSG00000012126.16	932.225	947.084	910.209	700.132	1252.25	1322.28	1058.25	982.116	776.178	1040.22	1130.4	999.089	1280.09	1982.28	1521.3	1572.15	1124.53	0.100791	0.102909	0	1	1	1124.53	0.295384	0.101974	0	1	1
ENSMUSG00000012187.13	3	0	2	1	0	4	0	2	0	0	1	0	1	1	1	0	1.12822	-0.603581	1.54698	0	1	NA	1.12822	0.911292	1.82371	0	1	NA
ENSMUSG00000012211.13	1	0	1	1	6	2	3	2	2	2	0	1	5	5	2	2	2.42173	2.48191	1.19624	1.23881	0.215415	NA	2.42173	0.796804	1.04666	0	1	NA
ENSMUSG00000012282.2	175	234	205	193	100	91	138	117	7	11	4	11	7	11	16	9	84.9668	-0.951413	0.183855	0	1	1	84.9668	0.248565	0.371761	0	1	1
ENSMUSG00000012296.16	5386	5731	5586	4952.99	6860	6908.99	7006	6425	5869	6008	5775	5368	7383.99	10359	9146.01	8249	6652.12	0.259978	0.0418437	0	1	1	6652.12	0.549394	0.0415755	0	1	1
ENSMUSG00000012350.15	20.9186	30.6536	51.0352	47.0221	23.0115	34.0171	34.028	29.0261	21.5153	16.0081	35.3372	25.9838	9.40813	20.0215	10.0042	12.0051	28.7593	-0.758684	0.449427	0	1	1	28.7593	-1.45013	0.484666	-0.928737	0.353026	1
ENSMUSG00000012396.12	38312.7	39906.8	42417.1	38045.4	44112	44347.2	38770.2	36046.8	49515.7	57311.2	53146.2	48376.8	64999.8	87533.3	71257	66135.5	50763.2	-0.0618497	0.0594181	0	1	1	50763.2	0.344065	0.0593456	0	1	1
ENSMUSG00000012405.16	50070.9	53940.7	51156.4	47507.5	46899	47022.8	52933.4	47864.3	47418.4	53562.1	53084.3	50124.5	42536.2	56405.8	52947.8	46321.1	50000.6	-0.225231	0.049513	0	1	1	50000.6	-0.0651659	0.0495115	0	1	1
ENSMUSG00000012422.14	6827.73	7325	7326	6759	5307	5588.3	5312.62	5039.96	4931	5570	5392	5042.65	3504	4267	3618	3433	5384.3	-0.546603	0.038013	0	1	1	5384.3	-0.616987	0.0389131	0	1	1
ENSMUSG00000012428.9	40	50	36	38	83	87	63	81	63	62	102	109	54	58	60	60	65.3974	0.84494	0.23114	0	1	1	65.3974	-0.658904	0.221876	0	1	1
ENSMUSG00000012429.9	2597.68	3028.59	3111.38	2616.79	3015.21	3196.22	3105.23	2977.67	2106.74	2350.52	2695.99	2390.19	3383.23	4250.66	3810.98	3436.38	2982.13	0.0189604	0.0734789	0	1	1	2982.13	0.457089	0.0735217	0	1	1
ENSMUSG00000012443.4	11698.9	12343.1	9992.88	8676.52	11216.4	11689.1	11576.8	11435.5	7708.6	9431.55	8757.84	8028.93	9392.77	11863.2	10204.6	9128.01	10159.8	0.0187217	0.0566577	0	1	1	10159.8	0.135584	0.0568242	0	1	1
ENSMUSG00000012483.4	2103	2312	2704.93	2472	2891	2908	2664	2623	2677.94	3069	2958	2642.89	2353	3174	2707	2445	2666.04	0.0914309	0.0809302	0	1	1	2666.04	-0.232685	0.0807862	0	1	1
ENSMUSG00000012519.14	56.0001	39	40	38	58	44	56	53	74	82	81	79	34	40	31	34	52.2162	0.291678	0.203813	0	1	1	52.2162	-1.14909	0.20306	-0.734241	0.462802	1
ENSMUSG00000012520.10	7	12	14	16	13	10	5	3	0	0	0	2	3	1	4	1	5.15646	-0.733437	0.635852	0	1	1	5.15646	2.38745	1.23222	1.12598	0.260176	1
ENSMUSG00000012535.14	28940.7	29932.6	25805.2	22926.4	21251.1	22157.5	22521	21157.9	22584.3	25193.2	24243.1	23053.7	20646.7	26127.8	23265.6	20761.2	23799.3	-0.375816	0.0375663	0	1	1	23799.3	-0.190294	0.0375887	0	1	1
ENSMUSG00000012609.19	1723.74	1854.35	1953.08	1742.05	1955.55	2047.73	2082.33	1986.15	2043.03	2459.11	2358.41	2245.55	1918.32	2571.77	2100	1860.3	2049.02	0.0210064	0.0574138	0	1	1	2049.02	-0.216129	0.0568379	0	1	1
ENSMUSG00000012640.16	2083	2249	2150	1818	3342	3344	3112	3104	2198.56	2732	2549	2251	3353.99	4267	3472	3252.01	2789.85	0.441822	0.0520772	0	1	1	2789.85	0.368832	0.0515671	0	1	1
ENSMUSG00000012705.16	15.0873	9.59088	18.0822	18.003	8.69956	22.2796	18.3075	17.5814	9.03734	12.0963	14.0343	9.58533	15.6622	15.0752	3.41893	24.2422	14.5329	0.00384448	0.472956	0	1	1	14.5329	0.261649	0.490913	0	1	1
ENSMUSG00000012777.14	11.0163	8.033	11.0901	5.01562	22.0463	25.0427	20.0658	17.0641	0	7.04649	3	9.02761	13.0674	22.0499	12	16	12.1536	1.21352	0.42622	0.500953	0.616404	1	12.1536	1.52323	0.491436	1.0647	0.287013	1
ENSMUSG00000012819.15	159	134	154	122	495	567	342	363	127	144	129	95	201.001	284	236	204	220.126	0.547474	0.246646	0	1	1	220.126	-0.32284	0.249956	0	1	1
ENSMUSG00000012848.15	115384	128663	115345	107037	129701	124217	133155	120693	104445	114044	111696	105009	120496	159367	143876	129590	122085	0.0179294	0.0335741	0	1	1	122085	0.204507	0.0335743	0	1	1
ENSMUSG00000012889.8	41	62	44	35	32	36	45	35	101	52	31	58	38	36	33	31	44.9323	-0.489084	0.309712	0	1	1	44.9323	-0.979352	0.306397	0	1	1
ENSMUSG00000013033.16	18954.1	19248.4	13619.6	11459.4	19000.1	20320.6	24268	21391.6	16221.5	17479.8	16049.5	16237.4	18579.3	21880	20287.5	18228.2	18234.3	0.263995	0.120206	0	1	1	18234.3	0.167692	0.120208	0	1	1
ENSMUSG00000013076.17	1900.43	1957.77	1665.92	1513.22	1661.99	1774.25	1606.36	1478.89	1929.26	2576.7	2275.39	2161.51	1756.33	2547.65	1887.4	1850.1	1900.3	-0.267363	0.0853783	0	1	1	1900.3	-0.153505	0.0846684	0	1	1
ENSMUSG00000013083.8	1	3	0	2	4	1	1	0	1	5	0	2	2	1	2	0	1.66576	-0.571972	1.33605	0	1	NA	1.66576	-0.616353	1.33332	0	1	NA
ENSMUSG00000013089.15	51213.9	53687.6	44283.2	40147.3	48571.4	50413.5	49657.5	46974.9	41495.8	48589.2	48134	45318.4	42506.7	56150.2	50458.5	45207.9	47537	-0.0509465	0.0427492	0	1	1	47537	-0.0474107	0.0427548	0	1	1
ENSMUSG00000013091.5	10	8	8	7	14	14	12	16	2	12	13	6	15	21	24	8	11.45	0.720804	0.452281	0	1	1	11.45	0.829651	0.448304	0	1	1
ENSMUSG00000013150.15	1047.33	1236.28	1040.97	908.476	1122.34	1162.81	1078.93	1056.86	1350.28	1400.56	1291.05	1257.13	1204.31	1396.15	1379.9	1186.98	1201.15	0.182627	0.0892382	0	1	1	1201.15	0.00373885	0.088305	0	1	1
ENSMUSG00000013155.10	1501.07	1713.04	1804.47	1561.48	1900.35	1800.92	1881.86	1573.11	1734.57	1811.93	1698.28	1649.82	1586.22	2129.34	1843.96	1901.25	1753.34	0.069375	0.0817871	0	1	1	1753.34	0.0180273	0.0816373	0	1	1
ENSMUSG00000013158.6	22	13	14	14.071	17.2427	12.2251	5	9	18	24.1706	23	20.2919	8	13.1679	20	18.1013	15.9048	-0.428089	0.44877	0	1	1	15.9048	-0.66676	0.425541	0	1	1
ENSMUSG00000013160.7	8489	8606	7627	6972	10006	9693	9713	9275	6837	7735	7397	6816	8017	11232	9903	8975	8527.47	0.196028	0.0361061	0	1	1	8527.47	0.285617	0.0362155	0	1	1
ENSMUSG00000013236.17	9960.01	10767	9852.01	8589	16223	17045	17935.7	15965	10805	11599.7	10736	10896	12348	14672	13395	11971	12704.4	0.768612	0.0548586	0	1	1	12704.4	0.304342	0.0548852	0	1	1
ENSMUSG00000013275.9	3499	3684	3482	3054	4947	5266	4131	3762	11205	13939	12859	10798	13656	19989	15081	14890	8793.45	0.320068	0.0895056	0	1	1	8793.45	0.290565	0.088432	0	1	1
ENSMUSG00000013338.16	49	54	32	23	15	9	14	19	21	33	17	31	10	8	9	3	23.6434	-1.36691	0.449237	-0.816748	0.414072	1	23.6434	-2.23518	0.495434	-2.49313	0.0126623	0.267122
ENSMUSG00000013353.10	14.2558	3.81554	8.22002	7.13677	9.30932	5.19805	9.66546	9.50089	9.68983	11.7192	15.4055	13.4262	8.33516	12.3706	9.22856	9.34971	10.0158	0.178991	0.496618	0	1	1	10.0158	-0.468062	0.470595	0	1	1
ENSMUSG00000013367.5	105.067	98.5913	87.323	97.3791	192.153	182.147	211.055	208.419	362.46	347.402	298.135	311.8	319.55	352.831	320.756	308.805	241.366	0.975637	0.129188	0	1	1	241.366	-0.138207	0.108989	0	1	1
ENSMUSG00000013415.9	67651	73076.1	64426	54896	48039.1	54604	51841.1	50140.1	39248	44867	45930	42280.1	43976	52962	46190.1	42358.1	52471.6	-0.543052	0.0576051	0	1	1	52471.6	0.220675	0.0576498	0	1	1
ENSMUSG00000013418.8	191	214	133	112	92	121	103	95	228	246	191	198	202	278	197	277	178.83	-0.747276	0.17555	0	1	1	178.83	0.0150389	0.164669	0	1	1
ENSMUSG00000013419.7	354.999	404	293	309	801	727	750	648	419	539	661	610.001	1124	1672	1330	1284	717.2	0.949825	0.113654	0	1	1	717.2	1.14512	0.109495	1.32531	0.185068	1
ENSMUSG00000013465.19	6716	7122	6943	6177.01	7428	7200	7165	6635	7842	8652	8423	7533	6985	9110	8024	7361	7441.65	-0.0332857	0.0387065	0	1	1	7441.65	-0.158523	0.0384521	0	1	1
ENSMUSG00000013483.14	20.5459	9.34592	18.5163	6.80577	4.61637	4.64971	6.92366	4.86811	19.5788	27.4784	2.39311	14.173	6.48999	15.9698	14.9966	3.77931	11.2594	-1.18875	0.655532	-0.287935	0.773396	1	11.2594	-0.66419	0.617818	0	1	1
ENSMUSG00000013495.15	432.011	450.704	684.989	705.769	1287.05	1219.27	1210.24	1279.27	676.075	794.385	873.291	782.411	1308.99	1876.57	1484.34	1491.83	1013.83	0.952265	0.157959	0	1	1	1013.83	0.845164	0.156984	0	1	1
ENSMUSG00000013523.13	269	282	313	318	208	203	222	180	572.999	625	527	556	200	267	264	225	336.75	-0.868673	0.158155	0	1	1	336.75	-1.35809	0.15425	-2.32148	0.0202607	0.389287
ENSMUSG00000013539.14	364.617	422.596	449.583	374.071	314.012	317.285	344.168	332.907	473.542	508.469	491.887	463.425	283.561	406.695	332.894	321.137	389.202	-0.529322	0.0984818	0	1	1	389.202	-0.546421	0.0972377	0	1	1
ENSMUSG00000013584.5	316	301	261	226	239	257	233	206	91	100	124	126	108	108	143	104	185.113	-0.333517	0.132038	0	1	1	185.113	-0.0531559	0.150093	0	1	1
ENSMUSG00000013593.12	16770	18393.2	17435.3	16113.9	17891	17244	17834.2	16390	23411.3	26183.1	26031.5	24133.1	23862.4	31498.4	29006.1	25617.5	21619.4	-0.0985323	0.0394829	0	1	1	21619.4	-0.0213366	0.0392245	0	1	1
ENSMUSG00000013611.14	29	31	38	37	43	36	65	36	138	139	102	111	80	92	88	70	71.2714	0.399286	0.263641	0	1	1	71.2714	-0.819055	0.230171	0	1	1
ENSMUSG00000013622.15	1205.56	1230.23	1228.08	1172.9	2065.02	2020.77	1734.46	1676.41	940.575	1034.95	1071.38	1007.38	1627.93	2325	1847.58	1751	1478.56	0.50173	0.0693248	0	1	1	1478.56	0.76484	0.069931	0	1	1
ENSMUSG00000013629.16	47417	48886	44854	40348	38692	40022	42948	38506	49649	56013	53143	49580	28406	31728	30729	24979	41910.3	-0.298856	0.0507767	0	1	1	41910.3	-0.967379	0.050812	0	1	1
ENSMUSG00000013646.17	3376.33	3815.52	3266.85	2891.77	4264.68	4042.37	4093.77	3823.48	5709.24	6486.01	6031.25	5292.45	4829.06	6884.11	5499.99	5582.84	4720.32	0.209159	0.0490569	0	1	1	4720.32	-0.156296	0.0479846	0	1	1
ENSMUSG00000013662.6	6707.1	7507	6633.89	5756.34	5196.71	5515.49	5362.69	5273.63	4940.06	5723.62	5352.98	5191.87	4310.1	5533.96	4716	4489.68	5530.39	-0.422976	0.0370355	0	1	1	5530.39	-0.230798	0.0374697	0	1	1
ENSMUSG00000013663.7	14194.2	15393.9	10421.4	8709.47	8251.05	9217.75	8909.19	8835.63	10193.6	11818	11057.8	10237.9	9411.06	12109.3	10032.6	9361.77	10487.5	-0.517534	0.092476	0	1	1	10487.5	-0.186266	0.0924599	0	1	1
ENSMUSG00000013668.9	3.02283	8	4	2	2	4.00186	5.04063	2.01752	3	8	4.08692	10	7	8.06203	9.07766	11.0959	5.55244	-0.470893	0.688809	0	1	1	5.55244	0.366809	0.576749	0	1	1
ENSMUSG00000013698.12	901	953.976	1255	1249	1219	1116	1291	1117	2970	3540	3772	3357	2336	3128.94	2592	2508.97	2064.57	0.0394175	0.111693	0	1	1	2064.57	-0.446726	0.109149	0	1	1
ENSMUSG00000013701.13	25908.8	28022.1	26748	24394.2	18007	17349.7	17948.2	16713.1	20157.4	21912.1	22164.8	20935	13763.8	18586	16924.6	15460.5	20441.9	-0.680443	0.0359088	0	1	1	20441.9	-0.518001	0.0360112	0	1	1
ENSMUSG00000013707.3	57	66	79	65	41	43	19	25	25	28	31	34	8	12	10	10	35.3483	-1.16858	0.262287	-0.642717	0.520408	1	35.3483	-1.69998	0.338536	-2.06766	0.0386719	0.65546
ENSMUSG00000013736.16	7723.11	8419.92	8111.36	7180.39	5058.3	5244.87	5354.61	5136.99	4955.07	5291.08	5671.79	5302.97	3621.11	4859.07	4166.14	4040.57	5651.64	-0.686999	0.0508712	0	1	1	5651.64	-0.3788	0.0514316	0	1	1
ENSMUSG00000013766.11	372.08	367.115	593.615	581.538	2861.43	2820.38	2801.51	2524.4	1510	1785.43	1749.15	1431.81	3217.98	5158.35	4030.19	4075.3	2211.71	2.46013	0.162075	9.00899	2.07969e-19	1.29167e-16	2211.71	1.25187	0.159567	1.57843	0.114467	1
ENSMUSG00000013787.15	20296.1	23235.5	24342.3	21216.7	16234.6	16346.4	18893.9	17060.4	12062.4	12735.3	12771.2	12625.1	10552.8	13988.7	12903.5	11728.3	16149.7	-0.444541	0.068421	0	1	1	16149.7	-0.0865289	0.0686435	0	1	1
ENSMUSG00000013822.7	3548	3957	3797	3603	2932	2730	2733	2555	3915	4089	4112	3877	2303	3054	2731	2329	3290.37	-0.549742	0.0529842	0	1	1	3290.37	-0.759159	0.0530034	0	1	1
ENSMUSG00000013833.15	3828.03	4178.23	4428.33	3947.69	4828.83	4737.87	4969.09	4500.92	4377.94	5257.57	5003.03	4583.01	4396.2	5560.33	4848.37	4359.83	4603.98	0.101741	0.0594109	0	1	1	4603.98	-0.176303	0.0592547	0	1	1
ENSMUSG00000013846.10	106.888	86.2435	104.91	94.1008	213.657	209.374	168.306	178.073	84.3411	64.5357	45.4546	51.2048	118.202	141.574	142.013	109.413	119.089	0.527551	0.293685	0	1	1	119.089	0.579402	0.300543	0	1	1
ENSMUSG00000013858.14	8627.56	9558.08	9426.81	8527.66	12217.5	12114.8	12313.1	11440.3	9856.88	10849.1	10077.9	9518.39	12669.7	17700.8	15156.8	14036.5	11400	0.29744	0.0352252	0	1	1	11400	0.448971	0.0350273	0	1	1
ENSMUSG00000013878.18	644.347	743.722	845.312	706.379	1045.55	1122.02	1124.24	1126.93	777.85	884.45	910.001	815.011	948.148	1361.37	1066.93	1055.8	938.426	0.39344	0.0816761	0	1	1	938.426	0.229109	0.0811219	0	1	1
ENSMUSG00000013921.15	1952	2053.01	1602	1548	1752	1843	1835	1773	3668	4283	3598	3517	3902	5033	4532	4285	2921.35	-0.101176	0.0811365	0	1	1	2921.35	0.298544	0.0791235	0	1	1
ENSMUSG00000013928.13	32.2763	34.5025	33.167	31.1525	49.5591	43.0557	45.1961	49.4754	24.0707	35.8458	17.334	27.6866	39.4525	49.1258	47.8856	44.5444	37.5166	0.423352	0.227983	0	1	1	37.5166	0.673588	0.237381	0	1	1
ENSMUSG00000013936.12	23.0434	38	26.0627	35	15	6.00001	6.13554	9.00001	40	23	27	31	8	7	26	9	21.3228	-1.81258	0.485933	-1.67221	0.0944838	1	21.3228	-1.46858	0.466679	-1.00407	0.315343	1
ENSMUSG00000013973.12	2980.64	3325.05	3035.64	2960.84	4768.09	4822.74	5995.84	5412.42	4584.51	5237.18	4840.55	4609.39	4761.69	6197.57	5462.22	5001.33	4588.11	0.643414	0.064885	0	1	1	4588.11	0.127866	0.0644051	0	1	1
ENSMUSG00000013974.3	7	6	4	8	6	5	5	1	3	4	6	8	2	8	1	3	4.82391	-0.674758	0.671697	0	1	1	4.82391	-0.757496	0.705311	0	1	1
ENSMUSG00000013997.10	2353.13	2561.07	2761.78	2289.28	3236.03	3217.71	2738.29	2593.94	3957.79	4483.99	4361.87	4046.62	5254.9	7030.26	6080.97	5837.87	3833.78	0.0856242	0.0724868	0	1	1	3833.78	0.284846	0.0712628	0	1	1
ENSMUSG00000014030.15	76	69	35	31	66	42	48	55	20	16	16	17	15	39	16	18	36.1686	0.0556098	0.479162	0	1	1	36.1686	0.938137	0.511504	0	1	1
ENSMUSG00000014039.18	1847.24	2005.24	1672.96	1377.52	1990.49	2055.46	2253.1	2024.22	1736.59	1938.51	1757.61	1799.45	2036.85	2490.41	2276.42	2050.03	1952.44	0.218896	0.0995217	0	1	1	1952.44	0.14336	0.0993883	0	1	1
ENSMUSG00000014074.17	5671.93	6068.82	5198.13	4615.57	6406.58	6710.26	6408.84	6196.68	5074.36	5998.58	5781.44	5349.52	5547.99	7541.3	6186.25	5821.57	5885	0.187768	0.0378513	0	1	1	5885	0.149999	0.0378472	0	1	1
ENSMUSG00000014075.15	533.9	585.721	657	585	618	612.999	568	481	951.001	1129	1028	884	748	931.999	835.901	837	752.224	-0.319029	0.0942358	0	1	1	752.224	-0.545883	0.0907428	0	1	1
ENSMUSG00000014077.13	4806.85	4995.96	5205.87	4611.89	3741.93	3976.86	3740.87	3751.94	5519.97	6434.7	5656	5229.95	3249.93	4380.63	3607.86	3497.95	4532.51	-0.452264	0.043626	0	1	1	4532.51	-0.68266	0.0435228	0	1	1
ENSMUSG00000014104.12	1	0	0	3	2	2	0	1	0	1	1	0	0	1	0	0	0.771836	0.275297	1.73254	0	1	NA	0.771836	-0.615595	2.03064	0	1	NA
ENSMUSG00000014158.12	113	116	117.002	126.002	137	118.001	160.002	151	185.001	218.002	200	196	266.003	416	299.002	310.002	192.627	0.0848626	0.145809	0	1	1	192.627	0.653744	0.131995	0	1	1
ENSMUSG00000014164.15	296.68	352.904	309.26	222.853	386.381	364.413	388.359	369.854	397.712	370.79	402.933	417.649	453.481	540.394	454.149	380.735	379.251	0.27619	0.10399	0	1	1	379.251	0.0809562	0.100562	0	1	1
ENSMUSG00000014177.10	2133	2388	2266	1936	2119	2327	2118	1902	2133	2502	2181.99	2177	1836	2512	2117	1962	2156.95	-0.066877	0.0445361	0	1	1	2156.95	-0.12868	0.0444841	0	1	1
ENSMUSG00000014195.15	33435.2	35731.4	31861.9	28620.2	31145.1	31516.4	31475.8	30227.6	22127.1	24508.3	25432.5	23713.7	27970.2	36761.4	33763.5	29534.7	29811.7	-0.0285921	0.037131	0	1	1	29811.7	0.41636	0.0372029	0	1	1
ENSMUSG00000014198.15	19.5229	36.3847	24.3288	26.2986	31.8295	15.3096	14.4655	6.38329	49.1261	43.215	51.5196	32.3026	8.21427	12.5726	9.71768	13.9426	26.5615	-0.508765	0.424158	0	1	1	26.5615	-2.48939	0.434243	-3.42986	0.000603903	0.0199884
ENSMUSG00000014226.10	49339	55486	44936	39213	20521	20777.9	22216	20309	32277	34436	36274.9	34754.9	15997	19637.9	18807.9	16633	30593.6	-1.28847	0.0585843	-4.92395	8.48161e-07	9.18493e-05	30593.6	-1.10365	0.0586588	-1.76702	0.0772243	1
ENSMUSG00000014232.14	1136.05	1324.55	1388.51	1228.12	1890.09	1978.99	1831.26	1681.67	1127.25	1334.8	1468.15	1270.58	1487.98	2010.14	1717.77	1593.02	1514.56	0.348631	0.0690002	0	1	1	1514.56	0.225254	0.0691257	0	1	1
ENSMUSG00000014243.5	1590	1719	1808	1596	1920	1853	1733	1546	1239	1271	1300	1248	1107	1401	1142	1036	1473.32	-0.0411006	0.0696567	0	1	1	1473.32	-0.255257	0.0714556	0	1	1
ENSMUSG00000014245.8	6312.13	6352.13	5489.98	4866.71	6445.98	6413.3	5899.43	5463.12	3388.66	3885.29	4308.61	4042.11	4888	6811.33	5459.03	5321.03	5325.89	0.0480637	0.0647838	0	1	1	5325.89	0.539864	0.0651706	0	1	1
ENSMUSG00000014294.4	4986	5383	4763	4304	3301	3078	3132	2757	3675	3940	3607	3425	2513	3433	2870	2650	3639.88	-0.772564	0.0481263	0	1	1	3639.88	-0.50179	0.048626	0	1	1
ENSMUSG00000014301.13	2173.91	2330.46	2513.93	2184.64	1909	1825.89	1986.78	1642.27	1945.9	2114.84	2087.41	2082.12	1749.92	2634.28	2242.71	2036.94	2090.88	-0.426417	0.067228	0	1	1	2090.88	-0.0624421	0.0671333	0	1	1
ENSMUSG00000014303.13	3268.49	3575.63	3433.78	3298.33	4805.9	4981.41	4561.52	4320.69	4884.78	6652.11	5958.64	4922.98	6436.02	8862.26	7120.89	6824.92	5227.07	0.430109	0.0711446	0	1	1	5227.07	0.281166	0.0704384	0	1	1
ENSMUSG00000014313.15	14788.2	16707.7	15344.1	13911.9	10156.8	10360	11007.9	9887.09	12997.2	13798.7	13649.3	13443.7	8058.24	9850.98	9075.55	8044.57	12091.1	-0.690151	0.0428474	0	1	1	12091.1	-0.797124	0.0430089	0	1	1
ENSMUSG00000014329.14	297.413	338.747	301.251	278.148	503.246	628.029	428	473.102	293.204	368.266	309.283	269.903	278.764	407.073	299.252	318.551	359.934	0.698187	0.118585	0	1	1	359.934	0.0817595	0.120927	0	1	1
ENSMUSG00000014349.7	18062	19282	18566	17470	16918	16975	17518	16659	19390	21727	20980	19895	15517	20621	18035	16564	18404.2	-0.204697	0.0347015	0	1	1	18404.2	-0.341594	0.0346463	0	1	1
ENSMUSG00000014351.12	13	11	12	12	0	4	1	2	0	1	2	1	0	1	2	0	4.01644	-2.94232	0.803668	-2.41682	0.0156566	0.542345	4.01644	-0.564955	1.23506	0	1	1
ENSMUSG00000014353.14	1551.64	1468.63	1261.01	1177.94	2444.01	2632	2359.9	2041.99	1931	2473.01	2214	1958.92	2818.95	3987.85	3038.95	3109	2235.48	0.622723	0.0796602	0	1	1	2235.48	0.492598	0.0784078	0	1	1
ENSMUSG00000014355.10	20681.6	20865.4	19532.7	17591.9	18116.8	19388.6	19856.9	19154.6	24560.5	30152.6	29663.6	26557.3	21531.2	27520.5	23623.9	21658.5	22420.1	-0.260419	0.0528386	0	1	1	22420.1	-0.310531	0.0527191	0	1	1
ENSMUSG00000014361.5	265	250	229	201	369	396	349	375	327	322	316	299	427	599	426	413	343.628	0.562254	0.094802	0	1	1	343.628	0.432222	0.090304	0	1	1
ENSMUSG00000014402.15	5188.98	5606.6	5380.51	4795.64	5895.78	5873.09	5705.12	5659.67	5878.93	6529.82	6464.02	5946.72	5600.61	7498.42	6714.48	6036.73	5902.27	0.13471	0.045032	0	1	1	5902.27	0.0174396	0.0447638	0	1	1
ENSMUSG00000014418.16	1719.43	1663.65	1824.94	1600.52	1793.28	1996.63	1869.3	1857.38	1727.02	2186.78	2122.55	1801.15	2045.29	2696.54	2144.21	2098.05	1937.02	0.00830517	0.0634221	0	1	1	1937.02	0.102766	0.0627771	0	1	1
ENSMUSG00000014426.9	6865	7298	5819	5146	6265	6226.99	6844	6139	7252	8396.01	7669.99	7406	6924	8997.01	7719	6937	6977.78	-0.0629473	0.066542	0	1	1	6977.78	-0.105959	0.0663282	0	1	1
ENSMUSG00000014444.17	18798	19964.2	17418	15793.7	16510.2	17944.8	18627.5	16355	12613.9	15174.1	15154	13194	13408.4	17151.2	16281.4	14715.7	16181.8	-0.216558	0.0588051	0	1	1	16181.8	0.0196144	0.0589093	0	1	1
ENSMUSG00000014453.4	6	3	6	3	1	0	1	0	1	0	0	2	1	2	0	0	1.77659	-3.39083	1.40286	-1.70425	0.0883345	NA	1.77659	0.324698	1.47941	0	1	NA
ENSMUSG00000014470.4	900.999	947	867	690	1235	1262	1085	1020	1060	1080	1187	1135	1535	2185	1864	1906	1241.96	0.318751	0.10141	0	1	1	1241.96	0.727895	0.0998441	0	1	1
ENSMUSG00000014496.8	11423.2	11645.4	11213.2	9968.43	10939.9	11889.8	11779.8	11619.8	9330.08	10938.7	10509.2	9850.22	10872.9	15036.6	11921.2	11933.4	11276.6	0.0457231	0.043924	0	1	1	11276.6	0.282482	0.0439397	0	1	1
ENSMUSG00000014498.9	3895.04	3941.16	3212	2618	3711.01	3782.01	3880.05	3488.01	4764.02	6000.05	5591.06	5039.04	5517.05	7821.04	6356.13	6698.09	4720.93	0.0500085	0.066341	0	1	1	4720.93	0.212844	0.0654512	0	1	1
ENSMUSG00000014503.15	531.395	613.192	525.921	411.108	612.536	625.595	589.182	581.461	546.607	663.805	628.477	544.02	765.636	1148.2	856.425	956.205	656.118	0.133784	0.0751812	0	1	1	656.118	0.568862	0.0722729	0	1	1
ENSMUSG00000014504.16	5895.49	6680.45	6575.09	5774.45	4063.25	3980.72	4170.2	3667.8	7125.63	8025.39	8088.49	7453.22	3802.4	4960.88	4526.16	4194.73	5651.09	-0.832485	0.0464192	0	1	1	5651.09	-1.02301	0.0461295	-0.49878	0.617935	1
ENSMUSG00000014529.9	1.00096	0	1.00051	1.006	1.02101	2.00544	1.01068	2.03122	1.00115	3.05731	7.03876	0	2.07138	4.02236	0	0	1.69228	0.881902	1.43562	0	1	NA	1.69228	-1.24337	1.25352	-0.194151	0.846058	NA
ENSMUSG00000014542.3	6	5	4	9	2	1	4	5	1	1	1	0	0	0	0	0	3.43612	-1.51129	1.0306	-0.496115	0.619813	1	3.43612	-1.96701	1.57757	-0.612972	0.539895	1
ENSMUSG00000014547.10	1531.38	1507.15	1258.88	1190.53	1432.89	1502.71	1548.31	1498.49	1891.28	2258.27	2084.85	1820	2352.36	3112.97	2679.95	2421.83	1861.9	0.0441728	0.0575819	0	1	1	1861.9	0.274817	0.0551815	0	1	1
ENSMUSG00000014550.14	4125.54	4338.06	3803.96	3378.04	3700.35	3801.72	3443.86	3344.91	2154.46	2272.92	2420.18	2163.66	1925.35	2418.22	2062.31	1997.95	2982.49	-0.202101	0.0485201	0	1	1	2982.49	-0.219297	0.0505503	0	1	1
ENSMUSG00000014551.8	5401.94	5970.12	5695.44	4929.69	4940.93	4636.97	4680.36	4412.86	3075.6	3168.54	2972.45	2935.65	1836.1	2207.28	1896.01	1736.68	3927.54	-0.638887	0.0682821	0	1	1	3927.54	-1.1216	0.0700025	-1.73707	0.0823756	1
ENSMUSG00000014554.13	861	887	863.001	853	1254	1252	1349	1232	598	650	619	587	694.999	959.001	961	796	894.271	0.433487	0.0785755	0	1	1	894.271	0.312417	0.081402	0	1	1
ENSMUSG00000014592.20	2330.97	2429.94	2355.88	2026.68	3467.97	3779.9	3495.87	3402.92	4628.99	5579.95	5206.96	4551.94	3549.83	4821.85	3885.96	3724.81	3758.66	-0.338306	0.0777889	0	1	1	3758.66	-1.20511	0.0768924	-2.66751	0.00764167	0.177719
ENSMUSG00000014599.10	40	38	25	27	24	32	34	31	21	32	41	38	25	39	50	54	34.8252	-0.595307	0.315331	0	1	1	34.8252	0.158749	0.307331	0	1	1
ENSMUSG00000014601.13	6721	7269.07	6522	5712	6906	6742	6883	6258	6054	6802	6290.02	5867	5422	7361	6524	6144	6454.66	-0.0393188	0.0398023	0	1	1	6454.66	-0.100736	0.0399083	0	1	1
ENSMUSG00000014602.15	410.352	476.442	379.226	348.881	349.566	455.629	495.124	346.009	2133.51	2206.47	1641.78	1640	1781.19	2346.59	1809	1749.37	1142.31	-0.00819119	0.112694	0	1	1	1142.31	-0.140825	0.103326	0	1	1
ENSMUSG00000014603.3	3	8	10	9	20	21	19	27	15	10	21	7	16	22	26	32	16.4577	1.33374	0.462368	0.721801	0.470417	1	16.4577	0.771007	0.427297	0	1	1
ENSMUSG00000014606.14	5901.89	6263.08	6885.92	6045.84	7232.05	6977.93	6952.15	6353.4	5232.27	5792.39	5667.49	5394.68	4578.84	5534.69	4959.37	4320.76	5896.72	-0.000968309	0.0599656	0	1	1	5896.72	-0.336298	0.0603307	0	1	1
ENSMUSG00000014609.16	4	8	7	2	11	2	3	3	5	6	3	7	6	5	5	9.00001	5.74843	-0.180907	0.746933	0	1	1	5.74843	0.0910851	0.719475	0	1	1
ENSMUSG00000014633.15	1181.5	1324.61	1267.77	1136.81	1029.5	1019.51	981.285	893.732	1185.9	1229.89	1272.75	1181.91	856.014	1032.95	983.443	799.197	1108.72	-0.655959	0.0737864	0	1	1	1108.72	-0.657616	0.074084	0	1	1
ENSMUSG00000014668.15	6227.99	6833	6793	6413	5914	6105	6395	6126	6450	7521	7475	6701	5750	7682	6638.99	6538	6593.6	-0.132596	0.0590225	0	1	1	6593.6	-0.127177	0.0589298	0	1	1
ENSMUSG00000014686.8	58.5269	63.9397	69.4787	42.9531	100.844	94.9794	83.1995	79.5792	72.5701	39.9702	67.7969	44.0233	47.6829	68.2939	64.4719	65.7549	66.9645	0.323087	0.288816	0	1	1	66.9645	-0.0895843	0.293908	0	1	1
ENSMUSG00000014704.10	4	0	2	1	3	5	1.54503	3	3	2	1.53306	1	2	10	5	3	2.88196	0.791497	0.903108	0	1	1	2.88196	1.13717	0.852284	0.160941	0.87214	1
ENSMUSG00000014725.16	29.1574	21.2103	33.0913	15.3583	13.8447	19.6725	26.5237	18.6049	10.376	22.9629	28.7542	14.4514	21.7495	28.5475	15.8551	26.1019	21.5571	-0.387604	0.356295	0	1	1	21.5571	0.176537	0.360124	0	1	1
ENSMUSG00000014747.6	41	43	24	17	28	25	28	20	21	17	12	21	20	25	26	34	25.0463	-0.390169	0.318127	0	1	1	25.0463	0.434421	0.335713	0	1	1
ENSMUSG00000014748.13	3918.1	4132.72	4319.1	4021.97	4210.82	4167.91	4058.34	3759.6	2338.28	2844.34	2764.54	2530.39	2143.08	2786.82	2328.47	2270.42	3339.24	-0.175234	0.0738355	0	1	1	3339.24	-0.367999	0.0749466	0	1	1
ENSMUSG00000014763.8	1530.48	1589.04	1410.43	1300.39	2437.29	2621.26	2404.57	2279.57	1987.98	2368.64	2352.65	2151.75	3217.8	4509.27	3923.95	3739.58	2473.85	0.705439	0.0486541	0	1	1	2473.85	0.737508	0.0465551	0	1	1
ENSMUSG00000014767.17	6513.31	7096.05	5454.42	5122.55	5397.95	5559.25	5261.72	5339.16	4867.66	5817.33	5378.87	4858.06	5003.5	6606.63	5760.06	5378.23	5576.36	-0.27557	0.0571605	0	1	1	5576.36	-0.00197402	0.0572414	0	1	1
ENSMUSG00000014769.10	19982	21517	18547	16824	15886	15661	15197	14154	17826	20159	19039	17677	15806	22321	18751	18148	17948.6	-0.432533	0.0346362	0	1	1	17948.6	-0.127941	0.0345577	0	1	1
ENSMUSG00000014771.13	3738.49	4224.27	4350.65	3743.93	4118.53	4058.44	4324.01	3946.4	3648.1	4166.6	4198.31	3845.12	4181.82	5645.6	5166.35	4726.41	4236.57	-0.0813446	0.0534744	0	1	1	4236.57	0.176677	0.0533035	0	1	1
ENSMUSG00000014773.13	915	1033	591	520	921	938	902	874	74	77	70	76	194	184	189	115	481.755	0.16437	0.197391	0	1	1	481.755	1.10297	0.218532	0.471194	0.637503	1
ENSMUSG00000014776.7	75.5287	95.133	98.4737	101.358	183.837	192.529	164.967	166.335	271.255	285.041	200.61	225.191	268.121	268.249	277.995	292.32	196.62	0.834915	0.158446	0	1	1	196.62	0.0553939	0.143345	0	1	1
ENSMUSG00000014778.10	1367.68	1340.8	1539.13	1383.81	2045.46	1937.02	2011.21	1868.98	2845.1	3136.82	2733.87	2449.86	2803.4	3967.26	3356.7	3444.63	2361.16	0.315953	0.0789994	0	1	1	2361.16	0.182463	0.0771189	0	1	1
ENSMUSG00000014782.16	115	137	154	136	369	381	349	311	187	195	164	178	257	341	301	247	234.835	1.15758	0.146569	1.0751	0.282332	1	234.835	0.509291	0.144584	0	1	1
ENSMUSG00000014786.8	581	534	515	403	1458	1435	1424	1248	1543	1655	1383	1307	2086	2608	2151	2246	1387.08	1.35601	0.0799285	4.45411	8.42422e-06	0.000760232	1387.08	0.493958	0.0746266	0	1	1
ENSMUSG00000014791.10	187	208	297	194	573	595.001	740	587	291	367	314	258	494	788.999	592	699	439.777	1.28884	0.126342	2.2862	0.0222423	0.729333	439.777	1.07562	0.123586	0.611907	0.540599	1
ENSMUSG00000014813.9	22	13	14	14	23.0528	24	21	28	31.0453	43	17	29	22	15	11	18	21.712	0.514843	0.361077	0	1	1	21.712	-0.966781	0.352596	0	1	1
ENSMUSG00000014837.15	833.06	875.333	994.26	784.816	1977.23	1890.54	2095.64	1889.63	698.424	885.199	864.314	875.043	1279.34	1657.78	1677.18	1471.96	1280.6	1.13425	0.0854444	1.57124	0.116127	1	1280.6	0.724109	0.0861061	0	1	1
ENSMUSG00000014846.12	707.297	873.224	1374.59	1282.62	1375.97	1281.28	1385.02	1201.85	399.061	391.208	405.272	385.056	476.341	529.596	506.33	398.497	815.238	0.160802	0.172548	0	1	1	815.238	0.0892999	0.176924	0	1	1
ENSMUSG00000014850.15	4803.96	5054.36	5275.23	4709.2	6217.69	6433.2	6537.78	6258.86	5160.7	6272.32	6533.07	5787.57	6359.44	8487.86	7408.96	6785.01	6087.24	0.284302	0.0546642	0	1	1	6087.24	0.139877	0.0544202	0	1	1
ENSMUSG00000014852.16	3.15562	3.08454	4.31977	3	3.15584	6.1517	1.10076	3.33618	1	4	4.40854	0	3.17276	1	1	2.21318	3.44782	-0.315165	1.06887	0	1	1	3.44782	-0.83266	1.1463	0	1	1
ENSMUSG00000014856.12	1783.37	1992	2112	1839	2250	2084.17	2069	1815	1694.2	1892	2073	1798.37	2039.18	2860.47	2517.09	2307.09	2057.95	-0.0572984	0.0718301	0	1	1	2057.95	0.201397	0.0716418	0	1	1
ENSMUSG00000014859.9	15989	17645	17433	15759	18626.8	17935.8	20246	18261.8	17559	20077	20431	18773	13190	16535	16337	13908	17436.4	0.0741591	0.0545269	0	1	1	17436.4	-0.46535	0.0545563	0	1	1
ENSMUSG00000014867.9	10188	10730.4	10604.1	9683.96	8228.22	8552.85	8383.32	7649.04	14506.5	16552.7	14874.5	13787.2	8614.95	11543.7	9229.78	8512.81	10786.5	-0.4899	0.0440141	0	1	1	10786.5	-0.798503	0.0437462	0	1	1
ENSMUSG00000014873.15	4601.92	5189.19	4676.9	4070.52	4008.92	3797.97	3856.26	3429.68	4514.52	5232.8	5564.8	5020.44	3616.9	4478.69	4604.69	3958.34	4445.98	-0.468498	0.0603489	0	1	1	4445.98	-0.528883	0.060161	0	1	1
ENSMUSG00000014905.4	1743	1976.99	1711.99	1513	2892.99	2996	2680	2532	2093	2282	2102	1871	2641.99	3663	2638	2803.97	2357.56	0.581359	0.0624196	0	1	1	2357.56	0.36492	0.0619366	0	1	1
ENSMUSG00000014907.10	9176.47	10532.7	10311.1	9204.01	7165.84	7657.33	8204.03	8086.1	6771.98	7861.93	8040.93	7614.92	4353.93	5278.89	5164.98	4495.96	7564.77	-0.437607	0.0638131	0	1	1	7564.77	-0.774259	0.064262	0	1	1
ENSMUSG00000014932.15	12966.3	13853.2	10260.1	8317.05	7393.15	7640.1	7898.04	7716.11	6536.16	7899.33	7939.15	7043.05	8974.1	12941.1	10346	10448.1	9207.51	-0.584061	0.0840468	0	1	1	9207.51	0.49413	0.0840824	0	1	1
ENSMUSG00000014956.15	24315.6	26793.4	23374.2	20166.3	16611.4	18172.4	17645.5	17216.6	25515.1	29931.4	28481.5	25796.5	19638.8	25731.3	21323.7	20983.1	22550.4	-0.472456	0.0474327	0	1	1	22550.4	-0.3379	0.0473372	0	1	1
ENSMUSG00000014959.12	9529.34	10036.6	9838.67	9366.21	8989.38	9194	9118.2	8579.65	11549.7	13175.9	12835.2	11796.3	7737.38	10306.7	9096.88	8192.38	10005.2	-0.297283	0.0334095	0	1	1	10005.2	-0.662482	0.0332603	0	1	1
ENSMUSG00000014980.14	2098.05	2379.38	2208.38	1894.48	1479.73	1510.13	1468.27	1346.99	1837.03	2039.42	2229.61	2084.38	1575.85	2034.79	1817.07	1736.59	1864.76	-0.665487	0.051511	0	1	1	1864.76	-0.328709	0.0509716	0	1	1
ENSMUSG00000015001.17	60	63.9999	152	147	61	65.9999	82.9999	83	1	0	5	8	8	12	9	9	48.949	-0.816613	0.47406	0	1	1	48.949	1.35355	0.637524	0.554567	0.579191	1
ENSMUSG00000015002.18	10775.1	11080.2	11020.8	9758.17	10248	11072.9	11247.1	10862.3	7863.83	9136.74	8983.05	8002.12	8517.73	11688.7	9843.63	9196.27	10172.7	-0.108976	0.0507011	0	1	1	10172.7	-0.0257183	0.0508813	0	1	1
ENSMUSG00000015013.9	1256.86	1363.96	1493.92	1328.14	1814.09	1763.15	1777.95	1648.35	997.235	1191.87	1274.97	1094.12	1608.71	2192.35	1904.79	1681.07	1512.9	0.206994	0.0682659	0	1	1	1512.9	0.603418	0.0687154	0	1	1
ENSMUSG00000015016.8	1195.01	1318.03	1384.03	1262.02	1813.03	1672.04	1839.15	1676.02	1665.04	1891.01	1799.02	1694.07	1667.13	2105.15	1899.09	1746.13	1656.81	0.326686	0.0594831	0	1	1	1656.81	-0.0595475	0.0584455	0	1	1
ENSMUSG00000015023.7	10796.7	11531.9	10125.8	9241.93	6912.3	7267.56	6985.25	6278.67	13628.4	15025.5	14323.5	13614.7	7800.75	9916.4	8521.91	7646.77	10010.3	-0.675551	0.0354168	0	1	1	10010.3	-0.818076	0.03503	0	1	1
ENSMUSG00000015027.11	280	301	328.032	262	677	597	652	587	380	414	437	374.05	731	953.232	791.158	749	519.814	0.933125	0.089896	0	1	1	519.814	0.835898	0.0861706	0	1	1
ENSMUSG00000015053.14	238	307	344	278	163	193	201	211	112	124	192	139	84.0001	107	82	86	188.967	-0.821404	0.236372	0	1	1	188.967	-0.39081	0.247165	0	1	1
ENSMUSG00000015083.11	156	177	135	100	239	219	209	223	139	158	169	135	261	336	322	286	201.132	0.539582	0.120629	0	1	1	201.132	0.902346	0.117202	0	1	1
ENSMUSG00000015085.8	17.7027	10.731	10.3856	19.5295	30	23.4439	23	16.127	66.8554	66.5947	26.5594	35	49.5351	125	66.4532	111	42.3987	0.527958	0.401031	0	1	1	42.3987	0.659705	0.345626	0	1	1
ENSMUSG00000015087.14	5291.08	5749.73	4755.55	4134.05	5253.12	5319.54	5180.7	4660.13	6030.15	6520.54	5928.19	5613.12	5572.15	7143.31	6440.25	5998.62	5593.67	-0.0873736	0.0906492	0	1	1	5593.67	0.11366	0.0904481	0	1	1
ENSMUSG00000015090.13	45	61	39	38	24	37.0001	28	41	82	57	37	37	16	9	13	16	37.6557	-0.687152	0.318616	0	1	1	37.6557	-2.25156	0.348863	-3.58753	0.000333828	0.0116713
ENSMUSG00000015092.9	8987	10362	9453	8260.96	7221	6681.97	7339	6349.84	8410	8769.96	8711.96	8035	5788	7559	7253	5930	7859.7	-0.533327	0.0520275	0	1	1	7859.7	-0.502262	0.0521118	0	1	1
ENSMUSG00000015093.15	16	34.9999	17	20	22	33	26	19	14	20	19	15	22	37	29	36	23.3748	0.211681	0.299511	0	1	1	23.3748	0.746034	0.303852	0	1	1
ENSMUSG00000015094.16	929.625	981.623	1028.77	894.575	2123.2	2066.7	2080.4	1917.03	1538.32	1837.54	1595.67	1463.37	2754.94	3685.38	3326.98	3154.13	1927.56	0.968576	0.0497109	0	1	1	1927.56	0.931952	0.0464801	0	1	1
ENSMUSG00000015095.12	2104	2249	2275	2013	3803	3676	3625.77	3391	2933.8	3309	3164	2805.81	3495	4424	4255	3777	3165.18	0.561762	0.0485344	0	1	1	3165.18	0.298658	0.0476755	0	1	1
ENSMUSG00000015112.15	10270	11110.1	11345.1	10498	11003	11551	11329	11183	14586	17382	17757	15508.6	11797	16302.3	12922	12761.2	12935.7	-0.0492491	0.0563496	0	1	1	12935.7	-0.407245	0.0561436	0	1	1
ENSMUSG00000015120.15	30547.4	33720.4	29646.6	26580.5	25539.8	25680.6	26697.2	24611.4	28525	32258.8	30995	29668.2	23508.8	30792.9	27817.2	26122.3	28454.6	-0.411235	0.030683	0	1	1	28454.6	-0.423041	0.0306653	0	1	1
ENSMUSG00000015126.9	2037.93	2245.99	2387.95	2076.98	2820.88	2764.86	2941.9	2477.95	2479.98	2758.89	2655.95	2418.94	2571.92	3451.82	3176.9	2861.89	2618.11	0.226519	0.0573867	0	1	1	2618.11	0.0906668	0.0569396	0	1	1
ENSMUSG00000015127.14	3397.99	3615.22	3516.77	3180.59	3715.14	4035.21	3887.29	3492.05	2999.26	3634.53	3479.69	2948.55	3196.95	4239.81	3552.43	3462.41	3566.91	-0.244275	0.0816864	0	1	1	3566.91	-0.137439	0.0817759	0	1	1
ENSMUSG00000015133.17	295.391	338.193	297.333	250.063	222.07	281.043	247.013	188.016	107.007	124.731	133.065	120.142	79.0101	119.017	91	91.0037	190.914	-0.540582	0.234089	0	1	1	190.914	-1.00365	0.246273	-0.0148266	0.988171	1
ENSMUSG00000015134.15	193.288	224.69	224.342	203.024	89.6801	93.1789	83.2163	66.1447	109.707	102.049	107.661	109.574	37.4833	75.8599	75.5486	71.2489	123.659	-1.72629	0.162636	-4.46571	7.98023e-06	0.000726373	123.659	-1.01787	0.175	-0.102108	0.918671	1
ENSMUSG00000015143.15	27221	29745	26754.7	23431.3	29445	30004	30522.4	27936.4	35712.9	42489.5	43153.4	38366.1	40185.6	54052.6	47193.2	43229	35371.2	0.0791903	0.0342402	0	1	1	35371.2	0.088581	0.0340538	0	1	1
ENSMUSG00000015149.14	1447.31	1634.34	1752.08	1559.24	1669.01	1532.39	1585.98	1474.41	1759.81	2216.18	2005.48	1802.29	2054	2995.01	2708.59	2509.01	1901.58	-0.121622	0.0751829	0	1	1	1901.58	0.249473	0.0739443	0	1	1
ENSMUSG00000015165.16	70767.3	76463.4	61090	54924.5	60242.4	60951.3	62057.4	58403.1	64346.3	69357.9	69313.6	65570	51437.9	64645.2	57596.8	50292.9	62267.1	-0.153037	0.0551204	0	1	1	62267.1	-0.301516	0.0551255	0	1	1
ENSMUSG00000015176.11	57706.4	66453.1	63298.2	55040.4	42368.4	42637.7	45665.2	42266.1	50008.6	53896.6	55044.1	53215.4	30255.8	35290.5	36370.4	29197.8	47971.6	-0.644467	0.0589673	0	1	1	47971.6	-0.817859	0.059011	0	1	1
ENSMUSG00000015189.12	935	983	956	826	1504	1633	1703	1561	667	839	962	789	1418	1964	1607	1470	1218.04	0.57626	0.124299	0	1	1	1218.04	0.762731	0.124588	0	1	1
ENSMUSG00000015202.13	1203	1316	1146	1069	1289	1311	1438	1325	1616	1737	1676	1619	1137	1457	1449	1221	1375.18	0.0838763	0.0575756	0	1	1	1375.18	-0.464178	0.0565453	0	1	1
ENSMUSG00000015214.14	1273.76	1426.78	1268	1170.84	1083.71	1187.65	1018	1066	878	986	949	862.507	928.562	1092.53	1009.52	928.412	1073.3	-0.266423	0.0678753	0	1	1	1073.3	0.0746715	0.0694119	0	1	1
ENSMUSG00000015217.11	2286.89	2468	2091.11	1996.51	2526	2438.95	2347.32	2068.14	1271.6	1311.87	1482.42	1413.56	1217.76	1349.98	1294.33	1094.08	1791.84	0.00485241	0.0856706	0	1	1	1791.84	-0.178465	0.0876517	0	1	1
ENSMUSG00000015222.17	402	444.001	664	636.001	499	580	622	512	423	452	440	439	768	885.999	812.001	791	597.391	0.148435	0.165179	0	1	1	597.391	1.0894	0.16496	0.541949	0.587853	1
ENSMUSG00000015224.10	22	32	36	17	51	51	36	41	36	35	23	29	46	61	49	29	36.6164	0.689746	0.271885	0	1	1	36.6164	0.404067	0.266471	0	1	1
ENSMUSG00000015242.14	0	2	4	1	3.00001	2	3	3	3	1	1	0	3	2	1	1	1.90489	0.527913	1.0211	0	1	NA	1.90489	0.514571	1.12064	0	1	NA
ENSMUSG00000015243.4	2996	2835	2829.01	2306	3817	4195	3543	3150	3651	5242	5849	4469	4799	7496	5169	6006	4182.22	0.179391	0.113446	0	1	1	4182.22	0.157094	0.112858	0	1	1
ENSMUSG00000015247.10	1691	1798	2108	2057	1898	1823	1903	1816	1720	2105	1834	1838	1408	1914	1666	1627	1826.52	-0.0969689	0.0826382	0	1	1	1826.52	-0.211376	0.0829123	0	1	1
ENSMUSG00000015289.4	3596.7	3859.68	4258.26	4036.49	3482.92	3304.73	3288.67	2937.4	4021.43	4582.78	4755.81	4286.02	2931.13	3817.4	3523.69	3120.76	3759.31	-0.399305	0.075533	0	1	1	3759.31	-0.553251	0.0754218	0	1	1
ENSMUSG00000015290.15	2290.69	2333.49	2352	2189.19	2335.06	2249.92	2404.63	2113.22	2375.19	2829.07	2703.64	2474.85	2181.73	2828.56	2476.06	2263.18	2420.14	-0.28457	0.0598872	0	1	1	2420.14	-0.496855	0.0595582	0	1	1
ENSMUSG00000015291.10	6211.54	6262.66	5336.46	4630.08	7400.5	7051.33	6484.73	6301.27	5740.85	6219.16	4966.83	4739.18	9329.48	13323.2	10911.8	11336.4	7185.9	0.129454	0.0701198	0	1	1	7185.9	0.934828	0.0699301	0	1	1
ENSMUSG00000015305.6	4392.79	4425.87	3820.5	3514.95	3217.9	3522.37	4454.47	4135.5	1538.69	1643.45	1686.69	1743.89	1897.75	2510.59	2237.91	1974.01	2944.31	-0.204179	0.0972669	0	1	1	2944.31	0.244676	0.0987648	0	1	1
ENSMUSG00000015312.9	676	749	1357	1267	1131	1017	924	850	656	706	585	455	493	693	479	444	784.851	-0.173051	0.201414	0	1	1	784.851	-0.294708	0.203469	0	1	1
ENSMUSG00000015314.10	109	116	95	83	133	126.69	120	98	36	63	50	58	87	106	94	94	90.6742	0.14747	0.144957	0	1	1	90.6742	0.640327	0.164675	0	1	1
ENSMUSG00000015316.11	59.0254	83.0131	85.6538	68.2851	34.2603	47.3654	30.3195	22.6098	84.7306	76.4983	67.4034	96.479	26.9549	15.3048	25.4556	10.7336	53.2189	-1.24613	0.271071	-0.907994	0.363881	1	53.2189	-2.17843	0.289354	-4.07262	4.64882e-05	0.00200755
ENSMUSG00000015335.16	2564	2963.86	3256	3099	3086	2947.91	3246.93	2814.84	3765.94	4197	3977.95	3637	2714	3608.56	3159	3018.82	3254.92	-0.0943851	0.0748107	0	1	1	3254.92	-0.433484	0.0745087	0	1	1
ENSMUSG00000015337.5	1413.21	1647.91	1716.79	1437.24	944.952	924.718	936.357	829.631	1819.15	1915.33	1924.38	1970.11	764.631	937.28	811.985	677.667	1309.54	-0.877291	0.0723254	0	1	1	1309.54	-1.3954	0.0724736	-5.45582	4.87481e-08	3.6375e-06
ENSMUSG00000015340.10	54	88	109	92	27	34	34	28	32	43.9999	53	48	25	51	25	17	53.6701	-1.89777	0.312356	-2.87418	0.00405076	0.173862	53.6701	-0.521095	0.322415	0	1	1
ENSMUSG00000015341.17	9738	10587	9702.99	8490.01	8206.9	8285.99	8173.99	7768	9505.9	10662	10287	9561.99	6937.99	8929.99	7780.97	7057	8883.25	-0.353448	0.0232944	0	1	1	8883.25	-0.513873	0.0233364	0	1	1
ENSMUSG00000015342.6	305.708	287.303	329.41	267.071	492.998	541.584	525.186	487.399	285	354.082	318.051	292.387	422.863	543.912	370.274	392.779	384.999	0.688589	0.0917004	0	1	1	384.999	0.343382	0.0923161	0	1	1
ENSMUSG00000015354.8	2457.01	2920	4235	3919	3068	3167	3708	3375	4119	4978	5495	4966	3348	4161	3813	3291	3837.92	-0.220202	0.15856	0	1	1	3837.92	-0.544553	0.158376	0	1	1
ENSMUSG00000015357.10	4377	4621	4504	3957.01	4543	4515	4451	4383	4252	4961	5195	4753	4718	6267	5303	5161	4732.49	-0.0826547	0.0424957	0	1	1	4732.49	0.0577261	0.0421513	0	1	1
ENSMUSG00000015363.13	1984.53	2047.63	1974.46	1807.79	2858.19	2842.42	2893.56	2778.62	3240.81	3325.54	3229.07	3018.69	3291.01	4431.8	3781.13	3659.05	2926.62	0.45787	0.0451367	0	1	1	2926.62	0.129414	0.0434564	0	1	1
ENSMUSG00000015365.15	1429	1564	1458	1336	3151	3169	2586	2470	1337	1381	1314	1139	1790	2310	1847	1713	1830.71	0.683793	0.101753	0	1	1	1830.71	0.30054	0.1024	0	1	1
ENSMUSG00000015377.10	1325	1292	1309	1060	2368	2199	2342	2121	1981	2089	1975	1783	3757	5118.01	4556	4577	2450.5	0.708116	0.0724732	0	1	1	2450.5	1.14119	0.0706116	1.99954	0.0455505	0.749135
ENSMUSG00000015396.4	5	2	12	13	12	12	19	4	15	24	13	9	20.9999	30	23	14	14.0043	0.533944	0.541671	0	1	1	14.0043	0.345437	0.492915	0	1	1
ENSMUSG00000015405.15	8	5	1	0	0	1	2	1	0	0	0	2	0	0	0	0	1.29012	-1.54776	1.79594	-0.304998	0.760368	NA	1.29012	-1.77216	2.1326	-0.362076	0.717295	NA
ENSMUSG00000015452.14	33	45	31	21	17	22	21	24	50	40.9999	36	40	30	34	43	35	32.7241	-0.781396	0.274831	0	1	1	32.7241	-0.406872	0.248425	0	1	1
ENSMUSG00000015461.15	7035	7857	8152	7549	9580	8914	9851	8909	6469	7729	7774	7229	8589	11221	10293	9070	8462.53	0.13964	0.0584233	0	1	1	8462.53	0.286301	0.0584331	0	1	1
ENSMUSG00000015467.14	46.0392	36.0053	22.9999	13	34.0091	35.9999	39	31.0097	56	62	35.9999	43.0213	59.0001	52	69.0001	76.0146	44.1049	0.0360018	0.315964	0	1	1	44.1049	0.210369	0.292068	0	1	1
ENSMUSG00000015468.14	1673	1745	2791	2467.01	4708	4679	5674	4884	2890	3409	2793	3016	2020	2130	2061	1633	2987.24	0.871661	0.148795	0	1	1	2987.24	-0.676226	0.149114	0	1	1
ENSMUSG00000015474.16	1118	1120	1090	1002	1400	1356	1501	1298	1616	1778	1689	1451	1661	2285	1926	1746	1487.25	0.161003	0.0511703	0	1	1	1487.25	0.0441054	0.0485549	0	1	1
ENSMUSG00000015476.6	55	70	51	46	29	18	36	24	42.9999	42	52	66	9	21	22	15	37.4267	-0.982801	0.324052	0	1	1	37.4267	-1.54696	0.342864	-1.59528	0.11065	1
ENSMUSG00000015478.13	3158.99	3720	3774	3180	4907	4839	5154	4661	3549	3923	3455.99	3259	3648	5015	4634.99	4128	4039.91	0.409939	0.0571237	0	1	1	4039.91	0.21329	0.0572145	0	1	1
ENSMUSG00000015484.3	3	4	9	4	8	18	5	8	2	0	0	5	2	8	5	8	5.48432	0.860414	0.707796	0	1	1	5.48432	1.54594	0.85322	0.639863	0.522261	1
ENSMUSG00000015488.14	958	985	779	679	1213	1253	1293.68	1179.33	1293	1649	1401.4	1271	1571	2102.36	1795.06	1727	1304.2	0.501134	0.0753027	0	1	1	1304.2	0.242253	0.072793	0	1	1
ENSMUSG00000015501.10	176.35	176.952	233.609	200.047	239.997	268.08	297.021	277.773	29.0001	29.2514	75.5237	52.9239	65.7707	86.4709	55.8649	56.3952	143.704	0.27107	0.279994	0	1	1	143.704	0.584577	0.304128	0	1	1
ENSMUSG00000015522.18	8438.45	8940.34	8307.68	7417.19	9159.42	10261.3	9519.08	9085.69	7622.77	8707.88	7548.33	7257.39	8575.82	11512.3	9741.09	9239.4	8784.58	0.0955264	0.0356055	0	1	1	8784.58	0.184652	0.0356471	0	1	1
ENSMUSG00000015533.9	8.00133	12.0052	11.0489	7.78174	7.00001	2.0063	4.00886	8.04175	2.00126	7.0406	9.00134	5.00916	4	5.68408	3.53222	5.00936	6.40907	-0.973902	0.552393	0	1	1	6.40907	-0.394189	0.59527	0	1	1
ENSMUSG00000015536.14	1643.32	1666.25	1614.48	1372.94	1406.65	1357.9	1266.36	1219.62	1643.48	1982.37	1742.41	1668.78	1464.08	2065.72	1834.9	1762.22	1606	-0.387156	0.0543165	0	1	1	1606	-0.146468	0.053038	0	1	1
ENSMUSG00000015542.17	1295	1478	1467	1234	1234	1149	1142	1129	1314	1568	1441	1380	1378	1739	1502	1424	1372.37	-0.516474	0.0646202	0	1	1	1372.37	-0.148813	0.063727	0	1	1
ENSMUSG00000015568.16	767.587	818.18	984.374	842.294	835.372	913.911	772.599	887.248	1207.5	1267.29	1206.84	1157.07	2719.89	4229.93	2732.55	2645.28	1482.04	-0.0988527	0.103579	0	1	1	1482.04	1.29881	0.100553	2.97164	0.00296217	0.0787811
ENSMUSG00000015575.15	4029.73	4490.34	4520.3	4280.54	3454.12	3428.34	3497.55	3270.53	3455.19	3872.36	3796.01	3472.77	2242.46	2863.93	2656.36	2382.83	3522.56	-0.479956	0.0546864	0	1	1	3522.56	-0.716538	0.0553864	0	1	1
ENSMUSG00000015579.5	46	62	96	62	100	111	90	67	58	85	129	97	138	182	154	162	100.967	0.377483	0.235652	0	1	1	100.967	0.673257	0.22582	0	1	1
ENSMUSG00000015597.17	3565.53	3392.07	3050.83	2536.49	4571.21	4843.55	4912.85	4657.07	4085.93	5111.17	4631.04	4208.78	4981.06	7118.09	5528.31	5530.53	4544.42	0.629908	0.0833898	0	1	1	4544.42	0.379617	0.0829704	0	1	1
ENSMUSG00000015599.9	309.684	330.242	269.206	250.746	234.735	286.828	253.11	241.226	398.843	553.471	541.956	505.577	788.324	1059.24	865.405	832.474	478.873	-0.266321	0.0969069	0	1	1	478.873	0.688738	0.0847189	0	1	1
ENSMUSG00000015605.6	6215	7149	7133	6368	5396	5544	5672	5179	5689	6452	7147	6596	5154	6740	6073	5278	6104.54	-0.317306	0.0562004	0	1	1	6104.54	-0.200482	0.0561817	0	1	1
ENSMUSG00000015619.10	468.621	509.633	544.344	486.954	635.974	743	639	642.78	38.8579	52	41	59	120.497	166	114.367	127	347.698	0.223738	0.0954534	0	1	1	347.698	1.41048	0.148905	2.75663	0.00584008	0.142243
ENSMUSG00000015627.5	37.1682	36.6966	21.8631	14.5669	34.7415	29.4998	43.8039	24.3765	19.0918	29.1467	21.1757	30.1977	34.1251	69.5003	46.1226	64.1619	34.0033	0.167632	0.30608	0	1	1	34.0033	0.97417	0.299713	0	1	1
ENSMUSG00000015647.9	34111	33463	31593	27367	56381	61210	65811	59145	25469	30742	29576	25678	49470	69393	54742	55351	43414.1	0.754265	0.052095	0	1	1	43414.1	0.849489	0.0521219	0	1	1
ENSMUSG00000015652.9	1700	1906	1762	1439	1926	1905	1695	1618	1686	1975	2023	1784	984	1422	1137	1099	1632.15	-0.0145982	0.0557151	0	1	1	1632.15	-0.810745	0.0569023	0	1	1
ENSMUSG00000015653.13	3273	3278.21	3009.06	2410.64	4855.73	5134.01	4388.34	4167.43	4256.48	5782.86	5698.13	4861.89	3472.31	4974.54	3803.74	3845.72	4187.81	0.580028	0.089836	0	1	1	4187.81	-0.509993	0.0895252	0	1	1
ENSMUSG00000015656.17	258717	272238	239241	219730	189449	190566	207691	193638	205869	233484	245173	222354	190982	256883	244912	218309	224180	-0.404841	0.0503019	0	1	1	224180	-0.0731329	0.0503003	0	1	1
ENSMUSG00000015659.12	1232	1261.85	1073.31	853.921	1527.85	1535.36	1538.91	1369.59	1716.38	2107.45	1826.07	1609.92	1953.28	2583.11	2174.97	2098.89	1635.17	0.312173	0.0970666	0	1	1	1635.17	0.187812	0.0955366	0	1	1
ENSMUSG00000015668.13	3327.02	3334.71	2823.06	2485.84	2118.95	2095.24	2012.12	1902.77	1568.05	1866.49	1910.51	1651.2	1382.75	1729.56	1559.9	1436.3	2094.62	-0.706232	0.0549814	0	1	1	2094.62	-0.356501	0.0568621	0	1	1
ENSMUSG00000015671.11	23970.8	25270	22602	20565.2	14604	13991.4	13759.7	13323.9	18649.7	19864.6	19785.1	18414	11439.2	14421.5	13418	11900.6	17350.7	-0.798301	0.0353988	0	1	1	17350.7	-0.653928	0.0355139	0	1	1
ENSMUSG00000015672.4	2959.36	3322.73	3001.2	2712.73	2302	2261.32	2281.31	2166.87	2528.33	2864	2981	2568.73	1672.6	2422.39	2018	1977	2527.51	-0.595571	0.0472639	0	1	1	2527.51	-0.628982	0.0477368	0	1	1
ENSMUSG00000015697.14	16456.6	16814	20746.3	18505.6	26288.1	27518.7	24872.8	23565.9	16134.2	18875	19306.6	17538.1	24391.6	33964	28774.2	27654.8	22385.2	0.393741	0.0795383	0	1	1	22385.2	0.55023	0.0795281	0	1	1
ENSMUSG00000015702.13	22	30	33.0098	26	71	82	40	42	14	15.0076	18	9	38	60	60	69	39.9636	1.17314	0.315475	0.548832	0.58312	1	39.9636	1.9605	0.34447	2.78834	0.00529796	0.131775
ENSMUSG00000015709.9	765	831.005	610.045	510.01	1197.07	1268	1177	1105	426	402.001	384	314	504.008	595.068	522.067	456	691.576	0.274859	0.20575	0	1	1	691.576	0.278971	0.208511	0	1	1
ENSMUSG00000015711.8	7093	7488	7853	7616.99	7024.97	7040	7461	6747.99	5979.99	7023.99	6655.99	6218	3835	5252.99	4304	3921	6389.94	-0.192577	0.0596483	0	1	1	6389.94	-0.713993	0.060145	0	1	1
ENSMUSG00000015714.11	3535	3516	4048	3616	5808	5738	5048.29	4705	2724	3462	3480.27	2979	5147	7820	6231	6547	4595.5	0.428729	0.0804516	0	1	1	4595.5	0.930666	0.080501	0	1	1
ENSMUSG00000015721.18	14.0623	9.02976	13.0862	16.2228	29.0002	8.08312	21.2505	17.4256	7.03865	7.10919	6	12.1545	21.173	34.176	21.1252	17.1283	15.3239	0.261821	0.428911	0	1	1	15.3239	1.17306	0.452058	0.382823	0.701851	1
ENSMUSG00000015733.13	11620.3	12457.5	12326.6	10968.3	10598.4	11177	10414	10312.5	11356.2	13206.3	13017.9	11780	9919.64	13999.4	11095.4	10979.2	11554.1	-0.162466	0.0454303	0	1	1	11554.1	-0.0578856	0.0453767	0	1	1
ENSMUSG00000015745.9	123	135	173	136	258	274	245	220	308	292	300	279	227	284	268	279	239.167	0.907572	0.113762	0	1	1	239.167	-0.295608	0.104463	0	1	1
ENSMUSG00000015747.5	1281	1404	1293	1230	994	1064.01	885	911	1373	1455	1528	1349	864	1167	980	902	1160.99	-0.274804	0.0844071	0	1	1	1160.99	-0.447427	0.0841586	0	1	1
ENSMUSG00000015748.13	13164	14025.3	11732.4	10371.8	10871.4	11112.6	10191.9	9412.28	10695.1	12088.2	12761.3	11684.1	11038.5	14684.4	13464.1	11868.3	11766.7	-0.195907	0.048403	0	1	1	11766.7	0.0936213	0.0483271	0	1	1
ENSMUSG00000015749.12	24665	28037	26205	22627	16643	17736	18148	16845	28347	31386	29996	28349	16049	19843	17036	15455	22507.4	-0.72174	0.0408202	0	1	1	22507.4	-0.865837	0.0407927	0	1	1
ENSMUSG00000015750.15	5186.17	5660.81	5186.25	4949.61	6267.24	6357.75	6323.38	5893.7	8769.12	9597.47	9063.8	8214.82	5938.17	7715.91	6554.81	6085.52	6740.29	0.195004	0.06545	0	1	1	6740.29	-0.427481	0.0651105	0	1	1
ENSMUSG00000015755.16	10434	10557	8895	7992	9944	10792	10174	9602.01	7724	8797	8279	7648	9183	13214	10060	9905	9526.34	0.0613365	0.0506692	0	1	1	9526.34	0.310577	0.0507419	0	1	1
ENSMUSG00000015757.10	8147.16	8805.09	7407.26	6314.11	5891.41	6187.24	6090.25	5688.88	6410.25	7781.86	7454.45	6793.5	6100.3	8324.7	6949.76	6722.76	6928.33	-0.432748	0.0421047	0	1	1	6928.33	-0.124469	0.0420167	0	1	1
ENSMUSG00000015759.11	2218	2396	2434	2157	2043	2186	2186	2009	5010	5617	5396	4940	4030	5635	4865	4605	3591.83	-0.271876	0.0465674	0	1	1	3591.83	-0.334374	0.0436382	0	1	1
ENSMUSG00000015766.14	5809.02	6389.04	4842.06	4286	4460.03	4683.06	5195.03	4793.72	6732	8070	7809.05	7157.06	6754.44	9055.14	7609.13	7081.24	6259.05	-0.278997	0.0740981	0	1	1	6259.05	-0.105638	0.0736387	0	1	1
ENSMUSG00000015776.12	6247	6944	7279	6580	4737	4703	4794	4408	4367	5107	4845	4380	3416	4556	3688	3540	4929.53	-0.438635	0.0615715	0	1	1	4929.53	-0.143324	0.062066	0	1	1
ENSMUSG00000015787.15	80	85	71.9999	83	121	110	88	78	29	35	48	34	71	92	66	48	70.8255	0.201273	0.191845	0	1	1	70.8255	0.784119	0.21664	0	1	1
ENSMUSG00000015790.16	1931.09	2290.93	2208.34	1914.51	2321.59	2216.17	2064.42	1977.29	1976.94	2307.54	2368.79	2096.45	2146.16	2966.59	2643.52	2595.85	2244.65	-0.048938	0.0633976	0	1	1	2244.65	0.194297	0.0629878	0	1	1
ENSMUSG00000015804.14	4677	5221	4976	4479.99	3575	3441	3539	3063	4666	5190.01	5239.01	4713	3401	4441	3777	3309	4247.25	-0.607502	0.0447233	0	1	1	4247.25	-0.518494	0.0445589	0	1	1
ENSMUSG00000015806.12	10290	11148	11443	10403	12224	11853	11803	11006	11800	12816	12564	11418	8891	10374	10017	8559	11058.1	0.0573176	0.0584769	0	1	1	11058.1	-0.448647	0.0585256	0	1	1
ENSMUSG00000015812.8	32	27.9999	9	3	15	13	8	12	4	6	6	3	22	22	18	19	13.6517	-0.608057	0.528545	0	1	1	13.6517	2.01571	0.584383	1.7381	0.0821937	1
ENSMUSG00000015829.13	17.0744	20.1073	17.8821	20.5995	27.2467	21.2686	29.4802	20.3	8.29525	7.47228	13.2992	6.95414	13.2517	31.7415	19.0842	22.2336	21.2053	1.01532	0.395071	0.0387884	0.969059	1	21.2053	2.29644	0.436522	2.96992	0.00297874	0.0790226
ENSMUSG00000015837.15	9466.31	9989.77	10537.5	9710.13	11131.9	10776.7	10438.4	10234.6	13583.5	15004.8	13369.8	12483.3	13936.2	21045.4	16613.5	16775.2	12708.2	-0.0120219	0.0645478	0	1	1	12708.2	0.188708	0.0642982	0	1	1
ENSMUSG00000015839.6	6087	6287	5565	4904	7130	7208	6599	6175	7673	9110	8528	7437	8930	13291	10305	10099	7743.65	0.158827	0.0497627	0	1	1	7743.65	0.252422	0.0492051	0	1	1
ENSMUSG00000015843.10	144.128	202.179	173.06	180.047	191.104	138.049	209.136	182.135	102.014	98.0213	85	118.032	80.0061	51.0324	56.0451	45.0102	130.74	-0.0472331	0.199463	0	1	1	130.74	-0.897077	0.219083	0	1	1
ENSMUSG00000015846.14	2974	3076	2481	2248	4062	4367	3305	3438	4815	5961	5897	4986	5479	7093	6186	5678	4351.44	0.299999	0.0733387	0	1	1	4351.44	-0.0596133	0.0723086	0	1	1
ENSMUSG00000015850.11	173.24	187.499	194.221	132.519	188.106	166.064	173.129	146.584	397.027	456.584	355.744	340.194	334.309	434.811	308.312	295.792	259.125	-0.532168	0.227805	0	1	1	259.125	-0.242224	0.220541	0	1	1
ENSMUSG00000015852.13	3	4	0	2	1	3	9	4	1	3	2	3	5	9	5	13	4.75575	1.16676	0.924535	0.180375	0.856858	1	4.75575	1.7876	0.90469	0.870571	0.383988	1
ENSMUSG00000015869.16	12797	14147	14739	13183	9636	9302	10152	9520	10902	12072	11925	11104	6886	8780	8233	7473	10698.2	-0.537953	0.0506205	0	1	1	10698.2	-0.56724	0.0508217	0	1	1
ENSMUSG00000015879.8	121	113	133	145	95.0031	83	89.0086	103	232	228	250	253	106	102	100	66	140.71	-0.536082	0.173922	0	1	1	140.71	-1.49812	0.168314	-2.95948	0.00308158	0.0814439
ENSMUSG00000015880.13	11144.4	11659.3	10234	8671.44	9359.35	9972.7	9663.5	9350.24	10958	12409.9	11440.4	10877.8	9547.66	12728.2	10980.9	10408.7	10564.6	-0.203582	0.0386778	0	1	1	10564.6	-0.185376	0.0385385	0	1	1
ENSMUSG00000015882.17	1085.61	1115.04	821.86	656.574	1438.81	1446.28	1460.72	1402.56	644.007	680.618	671.025	551.453	968.354	1316.53	1015.89	973.641	1005.65	0.648982	0.0898878	0	1	1	1005.65	0.627769	0.0918887	0	1	1
ENSMUSG00000015889.8	9402.28	9992	8800	7914	9874	10162	9177	8654	12494	13740	12899	11701	9742	12174	10920	9510	10424.4	-0.0514062	0.0485452	0	1	1	10424.4	-0.404737	0.0483151	0	1	1
ENSMUSG00000015890.2	71	84	67	70	185	144	125	125	177	176	162	181	90	87	79	61	118.188	0.890898	0.168725	0	1	1	118.188	-1.26148	0.165204	-1.58278	0.113472	1
ENSMUSG00000015932.8	55773	59570	48629	44347	48534.9	48115	50933	47941	54745	66134	69674	60938	41802	56772	46903	44301	52841.9	-0.183262	0.0536497	0	1	1	52841.9	-0.537028	0.0536376	0	1	1
ENSMUSG00000015937.15	5284.23	5647	6449.1	6052.13	8663.01	8476.39	8986.79	8055.69	11403	13080	11091.1	10612	11088.3	15966.2	13520.9	12847.5	9745.45	0.41903	0.0748558	0	1	1	9745.45	0.139308	0.0744208	0	1	1
ENSMUSG00000015942.9	314.062	339.099	321.602	270.826	517.741	520.388	602.416	517.69	354.477	458.087	534.396	499.601	571.938	696.546	685.979	667.776	481.666	0.439938	0.130962	0	1	1	481.666	0.377453	0.128298	0	1	1
ENSMUSG00000015943.11	2681	3076	2809	2469	1904	1918	1889	1705	1452	1601	1737	1599	988	1266	1208	1027	1851.35	-0.674456	0.050555	0	1	1	1851.35	-0.643609	0.0536519	0	1	1
ENSMUSG00000015944.9	619.021	711.956	491.543	440.414	451.666	577.32	492.415	518.221	440.549	404.253	461.515	427.382	250.921	373.941	331.663	292.389	456.061	-0.23387	0.112045	0	1	1	456.061	-0.580124	0.116149	0	1	1
ENSMUSG00000015947.10	3	2	1	1	5	3	3	1	1	1	2	4	9	21	7	7	4.5282	0.683383	0.917759	0	1	1	4.5282	1.92054	0.807888	1.13944	0.25452	1
ENSMUSG00000015950.13	46.3953	44.7053	49.3454	45.3909	52.3686	35.1978	33.4354	38.1936	37.2088	43.7304	30.9493	43.0114	47.1018	47.5086	36.5475	44.2525	42.3463	-0.317576	0.2337	0	1	1	42.3463	0.0137302	0.235713	0	1	1
ENSMUSG00000015957.12	88	102	81	82	97	90.9999	66	59.0001	64.0001	77	90.0001	61	111	132	132	109.133	91.6258	-0.209299	0.216002	0	1	1	91.6258	0.675803	0.213621	0	1	1
ENSMUSG00000015961.8	20697.4	22331.1	24194.3	21486.2	15801.7	16289.4	15894.2	15339.1	31950.2	36465	38246	35351.6	21189.7	27352.1	23899.2	21838.2	24324.1	-0.566743	0.0570562	0	1	1	24324.1	-0.703759	0.0568862	0	1	1
ENSMUSG00000015962.5	4	11	5	10	2	5	8	15	4	2	2	3	3	11	3	4	5.74258	-0.100015	0.664563	0	1	1	5.74258	0.737025	0.771007	0	1	1
ENSMUSG00000015966.17	11	22.0023	16	15	21.001	23	27	31.1572	6	16	19.0847	9	13	16	12.0012	10.0004	16.6929	0.745664	0.380001	0	1	1	16.6929	0.177402	0.415818	0	1	1
ENSMUSG00000015968.17	25	27.3579	35.8634	28	90.9508	108.45	86.4056	85.6295	52.9422	58.062	36.4943	51	62.5521	94.2951	89.0001	98	60.8573	0.916277	0.220377	0	1	1	60.8573	0.824176	0.203817	0	1	1
ENSMUSG00000015970.19	23	15.8702	28.1366	38	3.1343	5.55002	8.6721	6.37045	1.05786	6.93804	4.50565	3	3.44784	6.70492	1	6	9.9921	-2.23003	0.555632	-2.21376	0.0268455	0.849921	9.9921	0.162087	0.676507	0	1	1
ENSMUSG00000015971.5	5313.46	5828.98	5083.59	4575.2	4935.54	4880.45	5123.73	4827.85	5048.3	5310.38	5147.48	4800.18	4689.55	6294.29	5656.07	4943.37	5144.91	-0.183925	0.0468104	0	1	1	5144.91	-0.0392251	0.0467478	0	1	1
ENSMUSG00000015980.14	183.866	206.838	255.382	225.228	226.053	227.123	211.993	203.226	261.108	242.502	249.001	228.586	174.143	205.219	208.176	189.84	220.864	-0.134672	0.130372	0	1	1	220.864	-0.527743	0.130481	0	1	1
ENSMUSG00000015981.12	72.5	85	101.5	73.5	135.5	116	97.5	94.5	62	57.5	67.5	43.5	55	62.5	54.5	45.5	77.2294	0.3142	0.179895	0	1	1	77.2294	-0.228174	0.200115	0	1	1
ENSMUSG00000015994.10	9648	10562	10119	8979	7257	7423	8108	7772	6792	7669	7733	7162	6731	9291	8055	7675	8182.8	-0.381173	0.0457472	0	1	1	8182.8	0.0839728	0.0459232	0	1	1
ENSMUSG00000016018.4	23554.7	25165.3	18823.9	16731.1	15999.3	16413.3	17152.5	16003.2	17316	20130.3	20012.1	18249.9	15947	20940.9	18665.8	17331.3	18541.7	-0.242695	0.0636048	0	1	1	18541.7	0.0137993	0.0636022	0	1	1
ENSMUSG00000016024.9	32.2415	39.224	30.3534	32.2779	45.1936	65.7246	76.5279	63.2788	33.2045	35.7574	43.6649	32.1034	66.856	95.5868	72.2886	93.5265	52.1356	0.745723	0.221682	0	1	1	52.1356	0.975204	0.214373	0	1	1
ENSMUSG00000016028.10	1860	1827	1215	1035	3120	3311.01	2815	2497	3866	5148	4788	3767	6376	10032	6082	6989	3929.22	0.871162	0.139951	0	1	1	3929.22	0.619164	0.138728	0	1	1
ENSMUSG00000016087.13	28	19.0895	13.0726	13	24	19	21.0296	28.1256	16.0128	9.00764	12.01	12.0111	17	24.0056	33.0311	26	19.4813	0.249183	0.3452	0	1	1	19.4813	0.895541	0.362138	0	1	1
ENSMUSG00000016128.14	123.49	118.42	128.446	95.8281	169.566	173	230	182.496	69.258	56.1315	61	84	97	93.0001	87.8258	83.6498	120.067	0.449896	0.164689	0	1	1	120.067	0.114054	0.182397	0	1	1
ENSMUSG00000016150.15	165.791	193.553	140.911	108.65	202.564	236.329	196.869	174.451	42.6064	29.3257	66.8831	58.1315	71.2239	105.109	86.1497	70.3848	116.993	-0.289508	0.22723	0	1	1	116.993	0.274935	0.249679	0	1	1
ENSMUSG00000016179.11	21	18	38.0001	33	94	79.0001	87	94	8.99999	4	9	20	47	35	45	44	39.7594	1.48127	0.28758	1.6735	0.0942288	1	39.7594	1.62015	0.348538	1.77929	0.0751925	1
ENSMUSG00000016181.9	6553.99	6792.91	5237.78	4681.6	4070.69	3991.29	4058.26	3736.52	7145.6	7757.95	7180	7049.92	4636.52	5901.41	5411.25	4773.65	5527.64	-0.442224	0.0912538	0	1	1	5527.64	-0.372395	0.0909873	0	1	1
ENSMUSG00000016200.14	1407	1292	975.999	815.999	1931	1965	1975	1755	1932.97	2335	2284	1985	3673	5267	4177	4055	2273.6	0.598591	0.0986042	0	1	1	2273.6	0.869767	0.0966853	0	1	1
ENSMUSG00000016206.6	49	56	27	43	26	27	39	42	142	112	82	76	48	55	39	65	58.6128	-0.47768	0.299793	0	1	1	58.6128	-1.12151	0.278459	-0.436384	0.662558	1
ENSMUSG00000016239.11	322	349	328	307	359	391	287	282	230	206	190	250	208	243	170	146	271.464	-0.0683528	0.145369	0	1	1	271.464	-0.300152	0.151855	0	1	1
ENSMUSG00000016252.7	8514	9166	8213	7296	6596	6037	6244	5716	7156	7767	7902	7324	3915	4791	4679	3963	6650.06	-0.55058	0.0489211	0	1	1	6650.06	-0.951296	0.0493523	0	1	1
ENSMUSG00000016253.12	7440	8058	8258	7401	9183	8938	9246	8626	7413	8098	7645	7223	6904	9156	8219	7517	8062.43	0.130739	0.0364181	0	1	1	8062.43	0.043854	0.0365544	0	1	1
ENSMUSG00000016255.5	7	4	8	7	0	1	0	4	5	15	4	3	0	2	0	0	3.83109	-2.47052	1.00944	-1.45677	0.145181	1	3.83109	-3.88261	1.26858	-2.27231	0.0230677	0.430319
ENSMUSG00000016256.10	4219	4743	4131	3768	3835	3979	3530	3394	3766	3903	3585	3578	3357	4337	3734	3372	3828.74	-0.292316	0.0493754	0	1	1	3828.74	-0.138472	0.049547	0	1	1
ENSMUSG00000016257.15	6382	7299	7276	6338	4047	4055	4081	3902	5863	6625	6668	6033	3027	3956	3486	3253	5179.18	-0.813943	0.042288	0	1	1	5179.18	-0.967575	0.0426433	0	1	1
ENSMUSG00000016262.14	222	297	199	209	353	385	463	394	123	108	123	124.381	114	104	103	88	214.528	0.669141	0.16593	0	1	1	214.528	-0.416862	0.182803	0	1	1
ENSMUSG00000016283.13	6.1971	5.22805	2.07605	5.07147	4.11376	4.14512	6.18752	4.07235	2.03585	4.08577	1.01753	0	4.12225	8.21541	6.10973	3.08101	3.92944	-0.102329	0.675797	0	1	1	3.92944	1.44374	0.791165	0.560871	0.574886	1
ENSMUSG00000016308.12	5207	5805	6551	5846	4964	5030.99	5620	5349.01	3327	3808.99	3830	3773	2764	3721	3349	3062	4526.19	-0.292674	0.0790658	0	1	1	4526.19	-0.298423	0.079799	0	1	1
ENSMUSG00000016319.3	73734.9	78929	72209	67837.9	51239	48841.9	54628.9	49300	45362	47254.9	47832	46734	25346	30057.9	28681.9	23486	50078.4	-0.617333	0.0548357	0	1	1	50078.4	-0.930324	0.0549568	0	1	1
ENSMUSG00000016327.9	2	1	0	4	1	0	1	0	0	0	0	0	0	2	0	0	0.704527	-1.96296	2.18924	-0.439859	0.660039	NA	0.704527	1.24638	2.35227	0.104739	0.916583	NA
ENSMUSG00000016344.14	5021.4	5573.6	6099.99	5620.26	6380	6013	6277.62	5523.64	4220	4401.99	3922.02	4088	2510.33	2783	2781	2245	4649.05	-0.0296476	0.0819838	0	1	1	4649.05	-0.857818	0.0828857	0	1	1
ENSMUSG00000016346.17	459.826	463.447	593.178	465.285	1130.63	1133.3	1077.38	1051.32	590.269	602.27	673.597	633.285	928.522	1016.87	1037.68	930.295	790.387	1.07587	0.125737	0.603417	0.546232	1	790.387	0.0384534	0.125119	0	1	1
ENSMUSG00000016349.10	141	154	162	161	64	38	37	51	270	246	220	234	63	67	50	44	128.179	-1.80195	0.190476	-4.21026	2.55079e-05	0.00200242	128.179	-2.24715	0.182891	-6.81911	9.16054e-12	1.19409e-09
ENSMUSG00000016356.18	102	105	78	57	221	280	206	250	40	43	44	33	97	181	149	174	123.465	1.35354	0.225527	1.56762	0.116969	1	123.465	1.36904	0.243122	1.51791	0.129038	1
ENSMUSG00000016382.15	1918	1970	2453	2298	1119	1294	1549	1625	888	814	840	901	922	1218	1225	1058	1397.94	-0.692134	0.130921	0	1	1	1397.94	0.249086	0.132689	0	1	1
ENSMUSG00000016386.15	290	322	425	397	591	574	586	641	163	166	150	187	414	656	460	376	389.218	0.429474	0.142769	0	1	1	389.218	1.28426	0.149226	1.90489	0.0567947	0.895309
ENSMUSG00000016409.4	2569.97	2788.88	2375.98	2131	1917	2195	1944.04	1878	1987.98	2406	2088	1969	1865.95	2530	2079.02	1928.93	2163.53	-0.41223	0.0611753	0	1	1	2163.53	-0.038935	0.061364	0	1	1
ENSMUSG00000016427.7	2992	3193	2861	2470	2471	2575	2574	2416	2477	2774	2454	2371	1849	2155	2160	1805	2484.82	-0.30484	0.0508183	0	1	1	2484.82	-0.469755	0.0516039	0	1	1
ENSMUSG00000016458.14	877.846	1116.82	981.037	985	578.721	533	782	726	123.024	128.873	152	160	34	31.0193	23.636	19	426.95	-0.632767	0.150517	0	1	1	426.95	-2.27724	0.210629	-6.06391	1.3285e-09	1.25803e-07
ENSMUSG00000016477.18	4506	4582	4339	3587	4105.99	4177	4146	3778	5162	6343	6601	6123	3742	4470	4138	3647	4599.94	-0.174103	0.0557401	0	1	1	4599.94	-0.718534	0.055431	0	1	1
ENSMUSG00000016481.15	2724.49	2877.86	2780.39	2408.6	2172.79	2210.69	2263.1	2078	1473.57	1546.82	1652.96	1591.35	2426.03	3057.99	2601.67	2322.48	2261.09	-0.477721	0.0571467	0	1	1	2261.09	0.589827	0.0580283	0	1	1
ENSMUSG00000016487.15	4518	4736	4151	3474	3493	3801	3637	3263	3746	4143	3837	3624	2922	3874	2915	2824	3695.81	-0.36456	0.0635121	0	1	1	3695.81	-0.439299	0.0637684	0	1	1
ENSMUSG00000016493.13	19	15	30	14	32	30	23	27	29	31	23	35	159	196	184	216	53.2332	0.150509	0.289669	0	1	1	53.2332	2.33486	0.243615	5.4794	4.26779e-08	3.20722e-06
ENSMUSG00000016494.9	443.831	464.722	424.253	399.126	520.826	507.245	484.751	452.759	517.216	550.253	609.988	616.789	548.044	738.802	605.015	568.421	525.777	0.102164	0.0784696	0	1	1	525.777	-0.0420226	0.0751996	0	1	1
ENSMUSG00000016495.12	557	624	589	520	566	499	471	439	774	926	910	823	726	977	845	783	687.62	-0.353412	0.0685525	0	1	1	687.62	-0.153595	0.0630127	0	1	1
ENSMUSG00000016496.7	76.0637	75.382	53.1323	61.0288	55.9116	62.5336	59.7856	58.5547	57.8992	61.0429	60.7337	65.2544	91.8353	97.3887	81.4397	101.033	69.7109	-0.24835	0.179712	0	1	1	69.7109	0.477818	0.172575	0	1	1
ENSMUSG00000016503.17	5696.04	6351.29	6638.52	6118.02	5609.52	5325.42	5344.53	5043.48	5599.21	6070.99	6317.46	5888.55	4731.88	6099.16	5770.44	5029.76	5740.96	-0.306112	0.0602508	0	1	1	5740.96	-0.276063	0.060274	0	1	1
ENSMUSG00000016510.11	1418.96	1631.71	1386.48	1206.97	1422.79	1350.57	1384.47	1288.51	1650.8	1738	1848.53	1585.45	1496.12	2091.84	1930.56	1774.25	1575.08	-0.198292	0.0637082	0	1	1	1575.08	-0.196432	0.0624476	0	1	1
ENSMUSG00000016520.7	2911.45	3213.21	2777.68	2478	3326.83	3485	3740	3514	2864	3362	3009.64	2760	2538	3224.23	2913.21	2667	3041.37	0.200556	0.0490012	0	1	1	3041.37	-0.186789	0.0492778	0	1	1
ENSMUSG00000016524.12	0	0	0	0	0	0	4	1	0	0	0	0	3	1	1	0	0.572881	2.69718	2.6406	0.642726	0.520402	NA	0.572881	2.47742	2.64495	0.558583	0.576446	NA
ENSMUSG00000016526.8	7758	8362	7134	6615	6025	6483	5929	5596	10900	11902	11999	11205	7340	9661	8938	7919	8375.7	-0.464422	0.042357	0	1	1	8375.7	-0.605245	0.0417701	0	1	1
ENSMUSG00000016528.10	2855	3096	3105	2977	3452	3633	3266	3089	5473	6481	6865	5909	4268	6475	4877	5230	4417.51	0.0541253	0.069442	0	1	1	4417.51	-0.378162	0.068409	0	1	1
ENSMUSG00000016529.5	10	14	7	5	6	3	6	4	1	0	2	0	0	0	0	0	3.66995	-1.00024	0.698603	-0.000346611	0.999723	1	3.66995	-2.14936	1.43306	-0.802032	0.422534	1
ENSMUSG00000016534.15	1841.14	1826.79	1644.46	1456.16	2969.58	3406.02	2699.13	2760.52	3983.94	4814.69	4209.22	3742.36	5780.94	9196.57	6410.79	7549.34	3976.49	0.856527	0.0878164	0	1	1	3976.49	0.765058	0.0861601	0	1	1
ENSMUSG00000016541.10	27440	29044	25385	22992	21267	20894	22862	21145	18569	20311	19440	18910	16376	21969	19619	17632	21540.2	-0.377114	0.0389153	0	1	1	21540.2	-0.163732	0.0390528	0	1	1
ENSMUSG00000016552.13	2443.99	2467	2289	1997	3746	3750.99	3621	3429	2954	3801	3687	3494	4504	5772	4980	4553	3543.92	0.530143	0.0545112	0	1	1	3543.92	0.35898	0.0534528	0	1	1
ENSMUSG00000016554.9	52338.7	57504.1	49587.4	44696.2	33478.4	32545.6	34064.4	31569.2	39865.1	42600.7	42351.4	39683.2	29007.7	38415.7	34684.1	30047.9	39664.2	-0.712074	0.039041	0	1	1	39664.2	-0.406927	0.0390734	0	1	1
ENSMUSG00000016559.14	72392.1	78317.2	67485.2	60772	81789.2	81692	74967.9	71589.7	63055.2	68991.4	66107.7	61549.8	69273.3	93154.1	74654.8	71048.3	71984.3	0.103671	0.0355067	0	1	1	71984.3	0.176412	0.0355156	0	1	1
ENSMUSG00000016619.10	19717	21955	20235	18166	13968	14493	15044	13799	17028	19469	19788	18357	13396	16881	15193	13393	17221	-0.766158	0.0430096	0	1	1	17221	-0.542811	0.0430237	0	1	1
ENSMUSG00000016624.15	819.999	827.999	724	567	1091	1115	1100	989	1030	1170	1057	968	1250	1468	1351	1346	1056.97	0.454103	0.146518	0	1	1	1056.97	0.422423	0.145463	0	1	1
ENSMUSG00000016626.10	193	191	220	193	129	125	146	159	156	134	115	143	65	62	75	41	134.59	-0.515558	0.173718	0	1	1	134.59	-1.00124	0.190612	-0.0065207	0.994797	1
ENSMUSG00000016637.7	1237	1397	1120	1071	1378	1343	1318	1184	1305	1500	1408	1223	1208	1414	1365	1301	1296.28	-0.0499151	0.0649766	0	1	1	1296.28	-0.17207	0.0645691	0	1	1
ENSMUSG00000016664.16	10211.1	11210.7	9881.39	8679.53	8524.26	8968.04	9066.12	8280.76	15611.1	18823.6	18119.2	15659.4	12549.9	18669.8	14432.2	14488	12642.5	-0.26066	0.044341	0	1	1	12642.5	-0.318561	0.0438141	0	1	1
ENSMUSG00000016756.17	37040.4	39479.9	33607.4	27160.3	29056.8	35146.9	37848.9	36362.8	13860.6	19212.7	20200.7	18927	16310.6	19556.8	17977.5	17001.8	26243.3	-0.0716009	0.0982906	0	1	1	26243.3	-0.144697	0.098434	0	1	1
ENSMUSG00000016757.11	9792	10391	10155	9453	8596	8624	9093	8607	8955	9998	9695	9244	7188	8973	8199	6789	9013.53	-0.280508	0.0483633	0	1	1	9013.53	-0.40309	0.0484714	0	1	1
ENSMUSG00000016758.4	150	135	118	90	202	160	199	164	170	218	188	154	132	175	142	152	158.522	0.502959	0.130636	0	1	1	158.522	-0.395343	0.127617	0	1	1
ENSMUSG00000016763.15	110.456	89.2296	104.106	109.119	204.065	214.506	175.175	166.098	144.122	189.342	163.361	130.063	158.255	267.222	161.077	184.233	158.457	0.66173	0.183775	0	1	1	158.457	0.240146	0.179233	0	1	1
ENSMUSG00000016831.12	3935.25	4290.41	3736.19	3396.7	3971.38	4068.55	3939.05	3629.77	7179.45	8411.02	8006.84	7353.03	8168.23	10828.6	9063.93	8425.63	6091.84	-0.00236924	0.0584336	0	1	1	6091.84	0.140749	0.0571782	0	1	1
ENSMUSG00000016833.14	3378.14	3678.49	3492.7	3084.93	2276.32	2228.09	2192.47	2114.06	2993.65	3284.15	3168.16	2927.53	1777.43	2332.41	2248.65	1982.2	2726.48	-0.747152	0.0406403	0	1	1	2726.48	-0.755611	0.0410127	0	1	1
ENSMUSG00000016918.15	7245	7939.01	6504.99	5815.01	4098	4288	4800	4292.99	5684	6252.01	6414	6229	5046	5733	5533	4604	5676.48	-0.692989	0.0720444	0	1	1	5676.48	-0.41635	0.0719724	0	1	1
ENSMUSG00000016921.14	45702	50519.9	48233	41548	45637	45501	48731	46021	42290	47980.9	48567	45265	39629	51429.9	48785	44536.9	46203.9	-0.0797966	0.0451957	0	1	1	46203.9	-0.0263641	0.0451988	0	1	1
ENSMUSG00000016933.17	8924.99	9150.99	8299.97	7550.98	13215	13658	13886	12537	10183	11332	10799	9738	9425.01	11946	11376	10313	10738.1	0.611085	0.0472826	0	1	1	10738.1	0.0166699	0.0472583	0	1	1
ENSMUSG00000016940.18	1326	1374	1486	1354	2300	2219	2342	2189	1520	1633	1492	1427	1885	2345	2155	2060	1804.4	0.587339	0.0599659	0	1	1	1804.4	0.333934	0.0598464	0	1	1
ENSMUSG00000016942.6	81	55	27	32	12	8	14	7	16	23	17	20	8	11	8	12	24.6772	-2.54363	0.487693	-3.16516	0.00154997	0.0770135	24.6772	-0.515113	0.50937	0	1	1
ENSMUSG00000016946.6	7888	8380.01	7988	7191	6124	6081	6397	5912	6891	7520	7283	6847	4907	5968	5455	4814	6636.23	-0.44504	0.0361084	0	1	1	6636.23	-0.544206	0.0363965	0	1	1
ENSMUSG00000016982.6	22	28	22	18	104	102	85	82	9	11	19	12	89	165	132	149	62.7256	2.00699	0.236465	4.25852	2.05788e-05	0.00168435	62.7256	3.16641	0.268228	8.07672	6.65345e-16	1.35097e-13
ENSMUSG00000016984.7	6210.99	6411.97	6509.99	5767.98	7331	7521.96	7173.96	6924.98	5783	6560.95	6408	5917	7216.94	9395.95	7824.97	7257.96	6851.35	0.121525	0.0344753	0	1	1	6851.35	0.233763	0.034405	0	1	1
ENSMUSG00000016995.17	31	35.0001	33	45	17.9999	29	36.9999	34.0001	63.9999	67	77	67	53	90	69	67	51.6442	-0.592502	0.258741	0	1	1	51.6442	-0.214588	0.223695	0	1	1
ENSMUSG00000017007.9	3.00287	5.00375	6.0066	6	1	5.00552	8.01496	2.0015	10.0035	10	17.0045	12.0067	19.0166	32.0038	18.0108	40.01	11.0142	0.167331	0.61179	0	1	1	11.0142	0.942054	0.442743	0	1	1
ENSMUSG00000017009.3	3725.58	3892.74	3237.63	3275.94	1527.23	1815.43	1804.64	1903.97	5913.3	6749.03	6397.29	5606.69	3174.17	5269.26	4231.94	4651.18	3913.4	-0.999528	0.0857032	0	1	1	3913.4	-0.575493	0.0843121	0	1	1
ENSMUSG00000017057.9	764	799	995	843	382	417	473	468	435	448	529	477	226	264	221	177	504.461	-1.06582	0.122077	-0.539131	0.589796	1	504.461	-1.21776	0.128687	-1.69212	0.0906224	1
ENSMUSG00000017119.19	14202.2	15357.6	15112.8	13509.9	17630.7	18535.9	18339	17696.3	14398	16953.9	15938.6	14714.9	17503.9	22968.1	19439.9	17626	16796.1	0.235602	0.0345201	0	1	1	16796.1	0.296739	0.0344637	0	1	1
ENSMUSG00000017132.17	454	577.001	456.001	438	676.999	795.999	846	709.999	533	660.001	595.999	471	859	1214	1019	1011	690.993	0.554354	0.0711215	0	1	1	690.993	0.670641	0.0687049	0	1	1
ENSMUSG00000017144.8	2170.22	2385.48	2509.47	2415.1	2804.31	2972.5	2755.13	2770.7	1822.1	2101.9	2046.39	1870.87	1394.36	1596.26	1367	1286.6	2150.1	0.136292	0.0676979	0	1	1	2150.1	-0.632155	0.0693976	0	1	1
ENSMUSG00000017146.12	10641	10549	11025	9968	12989	13407	13500	12510	11045	13863	12716	11714	11428	15222	13100	11870	12170.1	0.224344	0.0445876	0	1	1	12170.1	-0.0242408	0.0445198	0	1	1
ENSMUSG00000017165.1	15	13	34	41	7	3	6	4	10	7	11	6	0	0	0	1	10.4766	-2.5147	0.586029	-2.58469	0.00974663	0.371515	10.4766	-4.93801	1.14957	-3.42565	0.000613333	0.0202371
ENSMUSG00000017167.6	17.7432	21.5567	10.0237	7.53215	19.5321	31.4923	19.377	23.9003	49	52.0832	45	55.0365	97.1931	144.295	89.3491	132.497	52.899	0.414224	0.373245	0	1	1	52.899	1.40703	0.312068	1.30431	0.192128	1
ENSMUSG00000017176.17	2003.45	2259.95	2425.8	2273.33	2494.49	2502.45	2276.35	2222.67	3473.61	3991.94	3851.91	3450.05	3201.48	4361.07	3693.4	3564.56	3001.84	0.00738878	0.0647798	0	1	1	3001.84	0.124488	0.0634669	0	1	1
ENSMUSG00000017188.3	3461	3732	3844	3383	2958	2876	2961	2599	2908	3367	3517	2999	2198	2685	2611	2213	3068.87	-0.586779	0.0659559	0	1	1	3068.87	-0.705435	0.0663518	0	1	1
ENSMUSG00000017195.15	8	8	11	4	18	15	16	13	26.0001	22	23	14	12	8	16	14	14.5008	0.691676	0.450215	0	1	1	14.5008	-0.850845	0.407238	0	1	1
ENSMUSG00000017204.4	63	84	63	75	95	76	57	61	62	53	59	67	46	54	27.6977	32	61.3878	-0.0797365	0.220816	0	1	1	61.3878	-0.726836	0.236539	0	1	1
ENSMUSG00000017210.14	8367	8840	8862	8229	11952	11619	11770	10941	9541	11024	10633	9695	10259	13615	12066	10964	10461.6	0.306353	0.0394337	0	1	1	10461.6	0.10342	0.0393074	0	1	1
ENSMUSG00000017211.14	6	17	6	9	8	12	8	9	4	10	13	3	15	20	7.30233	7	10.3639	0.448927	0.683603	0	1	1	10.3639	0.411337	0.686218	0	1	1
ENSMUSG00000017221.14	38280.1	42368.3	38538.6	34582.5	28983.6	28577.9	28081.1	25820.1	38237.4	40771.7	38923.9	37035.8	22867.7	28840.9	26452	22663.3	32758.7	-0.550973	0.0376822	0	1	1	32758.7	-0.743193	0.0377088	0	1	1
ENSMUSG00000017264.16	15714	17436	16363	14785	13693	13744	14231	12862	10596	12096	12615	12023	11044	15146	14044	12140	13661.6	-0.329519	0.0404075	0	1	1	13661.6	0.0130203	0.0405755	0	1	1
ENSMUSG00000017286.15	4856.35	5324.13	4329.02	3970.24	3630.72	3372.31	3335.55	3409.53	3768	4413.3	4279.9	3855	2884.75	3867.43	3326.01	2858.5	3853.22	-0.489368	0.0582583	0	1	1	3853.22	-0.525543	0.058483	0	1	1
ENSMUSG00000017288.15	2045.25	2030.29	2181.35	2017.8	3540.14	3598.98	3383.13	3046.46	3239.75	3614.55	3519.16	3332.97	3887.94	5401.97	4723.8	4290.79	3268.7	0.327787	0.059477	0	1	1	3268.7	0.174664	0.0583065	0	1	1
ENSMUSG00000017291.13	11146	11032	10103	8442	11381	13335	11994	11614	9333	11814	11363	9707	14208	18682	13884	13676	11868	0.158748	0.0638476	0	1	1	11868	0.393581	0.0637678	0	1	1
ENSMUSG00000017299.13	2280	2540	2239	2069	3071	3038	3154	2906	2559	2916	2883	2555	2697	3731	3337	3109	2788.53	0.118899	0.0406331	0	1	1	2788.53	-0.0631566	0.0400684	0	1	1
ENSMUSG00000017300.9	35.9121	40.4135	75.9437	55.7921	14	28	28.9148	8.56385	33.5897	31	52.8155	35.7377	22.8415	15.6939	20.7734	19	32.9733	-1.48379	0.339057	-1.42688	0.153614	1	32.9733	-1.08766	0.343057	-0.255537	0.798309	1
ENSMUSG00000017307.16	1886.86	2166.47	2094.85	1822.84	2395.57	2221.46	2199.23	2035.66	1778.21	2049.13	1958.22	1764.19	1961.24	2558.51	2218.14	2142.07	2070.98	0.0686032	0.0472279	0	1	1	2070.98	0.152901	0.0473918	0	1	1
ENSMUSG00000017309.11	18.0874	25.0678	12.0193	11.038	17.0314	17.0308	16.05	15.0664	18.0314	21.0206	26.0044	24.0253	9.02493	13.0152	15.0802	6.02241	16.4663	-0.17659	0.34875	0	1	1	16.4663	-1.19663	0.360491	-0.54545	0.585444	1
ENSMUSG00000017311.15	4	7	4	4	1	2	3	4.00001	8	7	5	1	2	3	5	5	4.31259	-1.16176	0.787309	-0.205463	0.837211	1	4.31259	-0.885719	0.732903	0	1	1
ENSMUSG00000017314.12	251	246	253	214	233	284	302	312	751	885	629	638	702	1124	747	808	514.838	0.104994	0.140044	0	1	1	514.838	0.0900767	0.130229	0	1	1
ENSMUSG00000017344.4	3	1	4	1	1	0	0	1	0	4	0	3	1	0	2	2	1.35384	-1.41084	1.48644	-0.276389	0.782249	NA	1.35384	-0.066685	1.31802	0	1	NA
ENSMUSG00000017376.15	2674	3020	2567	2393	3453	3892	4024	3615	3711	4304	4125	3675	4546.01	6390	5318	5138	3872	0.337288	0.0509325	0	1	1	3872	0.323898	0.0498919	0	1	1
ENSMUSG00000017386.10	9815	10449	7090	6597	7371	7166	7964	7331	10213	10749	9483	9087	7193	9386	8694	7862	8524.23	-0.270027	0.0921141	0	1	1	8524.23	-0.388946	0.0920291	0	1	1
ENSMUSG00000017390.15	451	440	603	574	299.001	269	343	294	1550	1592	876.999	1076	351	560	399	367	624.407	-0.932858	0.170232	0	1	1	624.407	-1.71834	0.167141	-4.29782	1.72487e-05	0.000805843
ENSMUSG00000017400.10	971	968	1102	970	510	452	489	503	2108	2355	2047	1932	577	876	724	761	1095.72	-1.14144	0.0886617	-1.59531	0.110642	1	1095.72	-1.6454	0.0851008	-7.58393	3.35246e-14	5.75561e-12
ENSMUSG00000017404.12	111963	123215	104424	96696.9	103824	98607.2	108614	96102.9	95589.8	103413	101730	95238.4	96151.6	126914	118402	102981	105020	-0.20588	0.0420149	0	1	1	105020	0.0205895	0.0420159	0	1	1
ENSMUSG00000017405.14	862.239	906.878	1084.5	977.495	1835.46	1778.5	1730.37	1507.34	1100	1348.55	1272.29	1182.7	2026.66	2998.08	2337.46	2611.42	1562.48	0.532535	0.0853817	0	1	1	1562.48	0.894796	0.0841218	0	1	1
ENSMUSG00000017412.15	60	59.0008	74.0033	54.0013	115.004	94.0001	102.003	111.002	23	33.0017	43.0012	45.0002	73	105	75.0015	76	88.0223	0.832671	0.428618	0	1	1	88.0223	1.57702	0.437686	1.31835	0.187386	1
ENSMUSG00000017417.14	243	235	354	350	797	696	821	749	1438	1591	1283	1266	1167	1622	1554	1365	954.594	1.30035	0.128686	2.33394	0.0195988	0.650735	954.594	-0.0763672	0.12192	0	1	1
ENSMUSG00000017418.13	5189.11	5426.34	4270.31	3494.67	4185.65	4645.82	4232.71	4053.7	4187.1	5212.62	4614.92	4177.47	3872.54	4863.39	4052.56	3958.82	4387.12	-0.156633	0.0711537	0	1	1	4387.12	-0.169649	0.0711772	0	1	1
ENSMUSG00000017421.18	32580.1	34760	24553.8	22297.4	25480	25781.2	25263.3	24202.1	27856.3	32711.1	30960.1	28091	24037	32243.3	28994	26505.3	27827.1	-0.256513	0.0766555	0	1	1	27827.1	-0.234262	0.0766371	0	1	1
ENSMUSG00000017428.16	21717.1	23262.2	20636	19178.6	16995.9	17845.4	17788.6	17184	16734.5	19013.3	18032.1	16673.4	13509.4	17664.4	15736.5	13902.4	17914.2	-0.414512	0.0329097	0	1	1	17914.2	-0.327285	0.0330573	0	1	1
ENSMUSG00000017446.14	14.1187	21.3156	20.1201	19.9155	23.3463	13.0207	25.169	15.0743	38.1989	49.2527	48.1556	41.1558	26.2353	26.6685	17.0941	13.07	24.9874	-0.174523	0.400896	0	1	1	24.9874	-0.367512	0.37939	0	1	1
ENSMUSG00000017453.4	2560	2730	3405	3205	4675	4572	4505	4334	3880	4228	3968	3626	2738	3453	3308	2905	3625.69	0.528772	0.0990651	0	1	1	3625.69	-0.374177	0.099129	0	1	1
ENSMUSG00000017466.9	166	191	185	205	213	230	194	209	941	1091	900	812	1109	1615.01	1025	1151	615.064	0.0186771	0.144678	0	1	1	615.064	0.138542	0.129136	0	1	1
ENSMUSG00000017478.15	18893.3	22674	21707	18703.3	16509.7	17434.4	18686.8	16458.9	19051.9	21125.9	21733.9	20165	16057	19900.9	18690	16101	19034.7	-0.343457	0.0537818	0	1	1	19034.7	-0.342127	0.0537767	0	1	1
ENSMUSG00000017485.11	4637.9	4758.93	3266.73	2833.95	4990.73	5336.85	4502.79	4386.9	5910.94	6858.91	6205.97	5656.94	6814.91	9084.85	7213.7	7319.84	5533.19	0.28473	0.117066	0	1	1	5533.19	0.178824	0.116681	0	1	1
ENSMUSG00000017491.9	19.1034	15.0747	24.2734	13.0485	21.2687	23.1512	14.2112	19.1041	14.0651	24.0966	9.02764	11.0542	22.0929	32.1513	38.1431	36.1642	22.7503	-0.0721681	0.428704	0	1	1	22.7503	1.72556	0.424372	1.70974	0.0873147	1
ENSMUSG00000017493.12	326.026	373.825	402.295	422.792	836.005	809.054	703.196	704.543	1695.53	1743.4	1496.43	1413.36	1231.48	1509.21	1344.75	1271.24	1033.73	0.975368	0.115818	0	1	1	1033.73	-0.487663	0.10995	0	1	1
ENSMUSG00000017499.15	9413	9895	10231	8808	7286	6981	6712	6347	12317	14044	13063	12274	6461	7978	7684	6283	9171.86	-0.598872	0.053939	0	1	1	9171.86	-0.992025	0.0537867	0	1	1
ENSMUSG00000017548.15	21607	22869	23708	21253	24600	27284	27277	27254	34115	41397	37942	34364	37414	55829	41913	43260	32271.3	0.124767	0.0601875	0	1	1	32271.3	0.149597	0.060047	0	1	1
ENSMUSG00000017550.14	6683	6640	5725.01	4969	6891.99	7371	6863	6549.99	5587	6999.01	6458	5794	6515	8490	6970	6462	6524.35	0.120668	0.05612	0	1	1	6524.35	0.0463443	0.0560825	0	1	1
ENSMUSG00000017561.16	6297.77	6752.47	6417.96	5808.89	4830.11	4752	4949.08	4625.41	5319.5	5837.61	5742.32	5318.26	3697.29	4812.12	4255.99	3778.59	5207.15	-0.465086	0.0350914	0	1	1	5207.15	-0.452442	0.0355085	0	1	1
ENSMUSG00000017588.2	7	8	14	4	2	4	8	2	4	3	3	5	0	2	3	0	4.35729	-1.13789	0.701418	-0.196585	0.844152	1	4.35729	-1.74964	0.927455	-0.808275	0.418932	1
ENSMUSG00000017607.9	81.2703	78.9627	126.149	136.071	62.0137	87.1014	63.1727	121.753	46.0161	26.0449	38.0272	52.4999	8.00314	31.2711	30.0419	23.0804	64.2344	-0.698863	0.370148	0	1	1	64.2344	-1.12556	0.403192	-0.311423	0.755479	1
ENSMUSG00000017615.12	5573	6132	5451	4824	4166	4289	4307	3996	5644	6539	6152	5822	3772	5153	4280	4015	5023.26	-0.483667	0.0270516	0	1	1	5023.26	-0.617716	0.0268456	0	1	1
ENSMUSG00000017631.18	5396.01	5571	5995	5402	9323.08	9937	9765	8861	9322	11735	11623	10349	11384	15699	12487	12062	9750.54	0.771902	0.0637606	0	1	1	9750.54	0.131406	0.0632991	0	1	1
ENSMUSG00000017639.13	2607	2766	3215	2904	3268	3668	4389	4021	3855	4224	4078	4037	3818	4618	4039	3549	3675.22	0.188604	0.0987769	0	1	1	3675.22	-0.111794	0.0984899	0	1	1
ENSMUSG00000017652.16	52.076	68.7511	47.6374	55.3504	97.6089	95.4702	112.825	107.298	74.6833	77.287	73.0226	81.0224	135.559	168.361	145.68	166.718	97.5882	0.828114	0.251646	0	1	1	97.5882	0.562338	0.242855	0	1	1
ENSMUSG00000017664.16	2350.08	2417.09	2634.36	2280.02	3416.08	3354.05	3298.09	3058.07	3163.01	3516.18	3408.11	3075.02	3792.23	5075.18	4274.41	4202.07	3313.58	0.36169	0.0429867	0	1	1	3313.58	0.353251	0.0418699	0	1	1
ENSMUSG00000017667.9	1289.47	1439.11	990.348	879.093	1580.58	1671.97	1391.86	1337.01	2397.76	2862.85	2603.33	2387.9	2419.31	2983.64	2515.92	2270.42	1920.61	0.295292	0.0927524	0	1	1	1920.61	-0.132041	0.0905899	0	1	1
ENSMUSG00000017670.16	3188.99	3472.85	3468.02	3031.32	5341.14	5256.1	5758.17	5232.18	4176.08	5155.57	4726.32	4328.63	6811.14	9240.21	8141.79	7764.04	5307.77	0.616622	0.0515793	0	1	1	5307.77	0.850486	0.0508388	0	1	1
ENSMUSG00000017677.11	6600	6697	6133	5560	10521	10940	10260	10057	7155	8214	7592	7019	9672	13627	10924	11486	8918.22	0.826801	0.0411278	0	1	1	8918.22	0.653581	0.0409087	0	1	1
ENSMUSG00000017679.16	1129.04	1222.78	1153.6	986.028	1193.92	1231.46	1240.53	1183.66	1573.06	1882.6	1818.37	1660.03	1323.03	1931.11	1632.22	1539.08	1410.8	0.0805236	0.0797306	0	1	1	1410.8	-0.00165213	0.0780448	0	1	1
ENSMUSG00000017686.17	7202.69	8059.33	6906.37	5909.15	6607.65	6770.38	6664.72	6642.56	7013.99	8135.92	7708.03	7117.96	6703.72	8459.58	7450.4	6901.05	7123.4	-0.137914	0.044953	0	1	1	7123.4	-0.0992548	0.0448213	0	1	1
ENSMUSG00000017688.14	1	4	0	0	0	0	0	1.05576	0	0	0	1	0	1	0	2	0.6124	-2.05803	2.33379	-0.453354	0.650294	NA	0.6124	1.17042	2.38931	0.071327	0.943138	NA
ENSMUSG00000017692.8	124.652	128	143.002	135.753	187.8	201.035	183.915	188.863	87.5526	85.0001	102.012	71.662	169.528	202.966	174.935	186.696	148.285	0.328841	0.179909	0	1	1	148.285	0.784134	0.18611	0	1	1
ENSMUSG00000017697.3	1582	1716	1756	1460	1287	1204	1455	1228	2094	2209	2212	2198	1041	1259	1357	1099	1584.68	-0.434424	0.0749489	0	1	1	1584.68	-1.0036	0.0746576	-0.0482761	0.961496	1
ENSMUSG00000017707.9	6916.98	7059.65	6959.62	6161.34	10270	10912	10109.7	9968.87	8318.52	10030.2	9288.17	7973.49	11356.8	17084.1	13109.8	13417.8	9794.06	0.500878	0.0472055	0	1	1	9794.06	0.488022	0.0468824	0	1	1
ENSMUSG00000017713.9	137	142	117	113	113	124	118	90	184	195	172	199	197	281	257	234	166.997	-0.31178	0.161939	0	1	1	166.997	0.339054	0.149529	0	1	1
ENSMUSG00000017715.11	8898.96	9364.95	8024.98	7016.99	6710.01	6960.99	7129.96	6596.97	7961.98	9243.99	8633.99	8008	5491.94	7342	6520.97	6311.94	7537.96	-0.380574	0.0396934	0	1	1	7537.96	-0.546388	0.0397511	0	1	1
ENSMUSG00000017716.15	12320.6	13456.2	12263.8	11142.5	11679.8	11176.2	11198.5	10393.8	10966.5	12245.9	11817	10612.9	8598.28	10646	10283.9	8933.07	11216.3	-0.342556	0.0440456	0	1	1	11216.3	-0.550293	0.0441691	0	1	1
ENSMUSG00000017718.15	175.201	163.474	226.463	201.596	390.329	368.484	294.262	266.581	250.999	333.14	319.33	347.273	465.554	718.644	490.196	564.192	340.164	0.477638	0.134307	0	1	1	340.164	0.737379	0.127813	0	1	1
ENSMUSG00000017720.2	12	10	8	12	10	10	6	6	11	5	7	4	19	12	11	15	9.93213	-0.504989	0.477294	0	1	1	9.93213	0.95731	0.475467	0	1	1
ENSMUSG00000017721.15	5677.81	5982.94	5916.86	5570.9	6421.66	6477.65	6394.6	5912.51	5203.78	5610.58	5106.78	4706.76	4564.65	6755.72	5869.39	5767.76	5733.7	0.00943666	0.0565693	0	1	1	5733.7	0.0204538	0.0567473	0	1	1
ENSMUSG00000017723.11	388	424	726	625	335	322	434	366	1391	1348	1133	1071	863	1325	1082	931	794.128	-0.724828	0.178768	0	1	1	794.128	-0.509444	0.174637	0	1	1
ENSMUSG00000017724.14	15452	16810	15445	13659	22659	21673	19518	18176	17417	20713	21491	18912	9987	12817	12222	10606	16679.4	0.397066	0.0614375	0	1	1	16679.4	-0.778808	0.0615446	0	1	1
ENSMUSG00000017733.4	1	1	1	2	2	1	5	5	4	10	8	11	1	1	3	2	3.66714	1.26903	0.927286	0.290129	0.771717	1	3.66714	-2.3651	0.804337	-1.69718	0.0896632	1
ENSMUSG00000017734.15	72.8646	64.311	87.7878	56.851	46.0489	80.5664	70.0221	59.2814	147.535	149.051	159.572	132.381	100.905	146.501	101.795	157.543	105.674	-0.136599	0.255589	0	1	1	105.674	-0.475437	0.239782	0	1	1
ENSMUSG00000017737.2	114	115	114	134	126	104	112	114	124	141	123	119	62	80	66	83	108.491	0.0866061	0.243066	0	1	1	108.491	-0.320101	0.248278	0	1	1
ENSMUSG00000017740.17	209.062	226.139	231.104	221	674.032	689	676	628.035	428.205	442.193	429	409.741	919.386	1223.16	1048.86	1074.5	597.311	1.58906	0.115443	5.10262	3.34976e-07	3.8654e-05	597.311	1.29693	0.109124	2.72105	0.0065075	0.156336
ENSMUSG00000017747.13	814.186	969.867	857.749	689.144	939.135	872.208	838.243	798.297	1128.41	1332.83	1241.14	1107.66	1239.01	1721.42	1368.22	1368.86	1068.96	-0.00998098	0.0772271	0	1	1	1068.96	0.189581	0.0743793	0	1	1
ENSMUSG00000017754.13	2287.89	2475.48	2822.44	2489.52	3481.74	3298.31	3768.27	3319.4	2489.07	2338.85	1709.15	1810.34	2149.27	2880.64	2668.04	2340.35	2637.43	0.317447	0.113148	0	1	1	2637.43	0.1491	0.1136	0	1	1
ENSMUSG00000017756.9	5952	5973	6059	5304.99	13085	14299	13015	12272	8888	11101	9698	8224	16081	24815	17833	19036	11774.1	1.07267	0.0757788	0.958944	0.337587	1	11774.1	0.950655	0.0754705	0	1	1
ENSMUSG00000017760.16	4174.49	4439.59	4248.6	3821.91	8719.65	8832.54	8680.64	8029.58	4480.05	5160.03	4922.02	4494.98	9583.3	14246.7	12379	11555.1	7275.86	0.997135	0.0511535	0	1	1	7275.86	1.2347	0.0508361	4.61682	3.89658e-06	0.000204687
ENSMUSG00000017764.2	5731.99	6016.7	5966	5538	8489	8504.8	9106.76	8596	5487	6093	5666	5348.74	5472	7342.76	6832	5737.77	6598.34	0.48421	0.0429126	0	1	1	6598.34	0.0442517	0.0432102	0	1	1
ENSMUSG00000017765.17	4367	4512	4712	4092	5172	5148	5183	4752	3515	3798	3560.01	3273	4856	6895	5317	5280	4619.51	0.0836423	0.0354852	0	1	1	4619.51	0.566878	0.0357811	0	1	1
ENSMUSG00000017767.3	1	4.30681	4	4	5	4.20184	6.24273	4	5	8	4	4.26082	5	2.23629	6	6.23072	4.47418	0.493289	0.669096	0	1	1	4.47418	-0.137254	0.624955	0	1	1
ENSMUSG00000017774.19	7527.74	8169.29	8768.41	8245.97	8200.64	8553.93	8546.65	8183.75	15921.9	19959.3	20055.3	16959.4	13274.3	20718.3	15625.6	17096.8	12712	-0.0915902	0.071975	0	1	1	12712	-0.224789	0.0715188	0	1	1
ENSMUSG00000017776.15	7140.47	7644.85	7766	6722.08	10574.1	11344.3	10449.6	10075.8	12494.1	14577.8	13220.5	12088.7	14140.1	20564.6	15813	16289.3	11704.5	0.378508	0.0510382	0	1	1	11704.5	0.164019	0.0505563	0	1	1
ENSMUSG00000017778.14	20560.6	23684.1	22474.7	19833.9	18310.9	17653.5	17409.8	16302.6	20626.5	22335.6	21919.7	20635.4	16351.8	21245.7	18411.9	16489.8	19705.8	-0.428574	0.0417506	0	1	1	19705.8	-0.381456	0.041743	0	1	1
ENSMUSG00000017781.17	7516.01	8414	8412.01	7648	7664	7846	7750	7238	9078	10563	10805	9352	6773	9307.01	7988	7658	8376.53	-0.239711	0.041416	0	1	1	8376.53	-0.390185	0.0412386	0	1	1
ENSMUSG00000017801.15	4138.83	4569.86	3973.09	3732.15	3037.88	2926.13	2891.64	2819.81	3513.93	4172.51	4152.77	3737.59	2738.97	3536.71	3342.32	2891.77	3514.97	-0.551203	0.0647323	0	1	1	3514.97	-0.331039	0.0647088	0	1	1
ENSMUSG00000017802.14	4081	4513	3789	3564	5366	5740	4915	4781	4985	5810	5336	4718	5402	7020	5854	5446	5044.17	0.232503	0.050339	0	1	1	5044.17	0.0205342	0.0499167	0	1	1
ENSMUSG00000017817.11	65	48	56	42	114	65	84	104	84	104	87	115	84	107	104	95	84.4289	0.7162	0.205074	0	1	1	84.4289	-0.119386	0.192892	0	1	1
ENSMUSG00000017830.15	70.0002	59	66.0002	48	48.0003	31	38	33	110	145	132	121	64.0324	92.9999	73.0001	68	74.3637	-0.733138	0.211583	0	1	1	74.3637	-0.761305	0.182941	0	1	1
ENSMUSG00000017831.8	9816.82	11397.7	10914.7	9373.89	10499.8	11367.7	10942.9	10765.9	10074.9	11545.9	10532.8	9897.88	10421.9	14876.8	11575.8	11886.8	10943.1	-0.0254594	0.0459956	0	1	1	10943.1	0.0804458	0.0459381	0	1	1
ENSMUSG00000017832.2	32	38	20	22	19	18	9	20	32	30	51	35	33	23	17	22	26.5936	-0.857982	0.351068	0	1	1	26.5936	-0.760934	0.329927	0	1	1
ENSMUSG00000017837.12	2878.55	3184.81	2742.89	2591.89	3205.32	3189.35	3018.26	2844.27	2857.3	3237.39	2967.23	2865.24	3041.24	4213.31	3566.12	3260.28	3088.41	-0.079654	0.0434146	0	1	1	3088.41	0.0736808	0.0430854	0	1	1
ENSMUSG00000017843.14	13269.6	13750.8	12159.6	11154.2	13951.7	14014.6	14961.1	14132.4	14568.5	16341.4	16146.5	15089.4	14187.6	19182.6	17545.6	16403.1	14718	0.0366754	0.0404475	0	1	1	14718	-0.0898159	0.0402832	0	1	1
ENSMUSG00000017858.12	4697.99	4888	4519	3862	4392	4417	4234	4057	3309	3786	3382	3205	3964	5640	4710	4437	4195.93	-0.134667	0.0379025	0	1	1	4195.93	0.364552	0.0382556	0	1	1
ENSMUSG00000017861.11	86577.4	93436.6	88778.1	80108.3	129882	128157	127848	119500	86202.2	95673.8	94546.6	87333	111309	146657	137554	123460	108065	0.483714	0.0316668	0	1	1	108065	0.476757	0.0316618	0	1	1
ENSMUSG00000017868.16	578	587	500	437	169	171	199	165	162	154	162	158	64	86	80	47	242.697	-1.7419	0.114902	-6.4568	1.06937e-10	2.19242e-08	242.697	-1.34782	0.141702	-2.4546	0.0141042	0.292374
ENSMUSG00000017897.18	31	26	19	27	23	17	17	19	75	52.0001	43	55	55	82	39	64	43.119	-1.93782	0.389895	-2.40531	0.0161589	0.554842	43.119	-0.78177	0.35018	0	1	1
ENSMUSG00000017929.13	3298.61	3345	3341	2895	4276.62	4306	4017.82	3574	6295	7375.65	6917.96	6263	4191	5178.82	4715.52	4149.35	4619.35	0.157537	0.0525596	0	1	1	4619.35	-0.701851	0.0516205	0	1	1
ENSMUSG00000017943.15	130	132	127	131	113	123	167	169	217	261	223	218	154	225	213	172	173.625	-0.0495753	0.155028	0	1	1	173.625	-0.403192	0.146376	0	1	1
ENSMUSG00000017950.16	563	501	261	239	194	213	164	177	67	42	33	68	15	6	27	18	152.631	-0.971203	0.492227	0	1	1	152.631	-1.72317	0.526022	-1.37479	0.169196	1
ENSMUSG00000017969.13	1627	1889	1906	1788	1296	1272	1221	1243	1716	1837	1879	1660	1123	1540	1301	1144	1531.24	-0.568179	0.0659672	0	1	1	1531.24	-0.546015	0.0659902	0	1	1
ENSMUSG00000017978.18	32	39.0032	50.0001	29.0032	110	152.011	87.0009	103	29.0034	20.0037	27.4393	18.2078	141.842	321.619	183.612	235	89.5122	1.28846	0.240924	1.1973	0.23119	1	89.5122	2.86148	0.253294	7.34909	1.99567e-13	2.96779e-11
ENSMUSG00000017999.16	20637.9	23108.9	22569.3	20111.1	18425	18292.1	19301	17205.6	19018.3	20635.8	21126.3	19615.6	16009.3	20631.3	19555.1	16926.2	19631.7	-0.367626	0.0420218	0	1	1	19631.7	-0.263144	0.0420464	0	1	1
ENSMUSG00000018001.18	1293	1382	1068	1019	1304	1373	1485	1346	1293	1472	1229	1157	1433	1828	1513	1500	1349.03	0.167367	0.0796209	0	1	1	1349.03	0.153068	0.079137	0	1	1
ENSMUSG00000018008.8	158.78	170.879	123.444	100.257	85.5065	105.53	62.6609	65.9799	159.202	110.343	123.698	153.86	63.908	90.7066	99.2625	53.3683	106.796	-0.758136	0.199549	0	1	1	106.796	-0.793408	0.200552	0	1	1
ENSMUSG00000018012.11	618	737	847	809.999	1107	998	1220	1173	716	761	695	608	698.001	881	891.001	736	844.546	0.511117	0.121456	0	1	1	844.546	0.126742	0.122492	0	1	1
ENSMUSG00000018040.9	9259.1	10048.4	12089.5	11496.3	9425.03	8741.34	9596.99	8649.81	11181.4	12255.5	12596.9	11524.8	6308.67	8204.5	7475.16	6398.9	9762	-0.319529	0.0837666	0	1	1	9762	-0.862188	0.0838389	0	1	1
ENSMUSG00000018042.18	13532.7	14493	14459.8	12975	17140.5	16773.7	17636.9	16163	14646	16495	15416.9	13615.7	10557.6	13379	11687.3	9978	14331.6	0.176342	0.048431	0	1	1	14331.6	-0.542242	0.0485591	0	1	1
ENSMUSG00000018068.13	9355.37	9780.33	8775.64	7709.56	8796.34	9307.14	8846.89	8341.97	8965.81	10766.1	10892.6	9865.45	7439.78	8932.79	7875.13	6912.31	8928.97	-0.0861201	0.0590561	0	1	1	8928.97	-0.517935	0.0590656	0	1	1
ENSMUSG00000018076.12	9684.01	10322	9469	8332	11022	12578.4	12910.3	12502	9207	11678.3	11049	9949.01	16300	22656	17323.5	17003	12481.7	0.302323	0.056162	0	1	1	12481.7	0.700796	0.0559914	0	1	1
ENSMUSG00000018102.5	1314.47	1390.74	927.043	825.367	1463.72	1529.91	928.669	950.572	891.32	950.896	1041.66	932.679	1392.68	1766.55	1379.1	1350.58	1178.11	0.0359581	0.149306	0	1	1	1178.11	0.490233	0.149312	0	1	1
ENSMUSG00000018126.15	66.0001	70	50	58	93	106	93.9999	103	150	146	105	120	163	310	189	207	126.316	0.0802393	0.309942	0	1	1	126.316	0.455618	0.298304	0	1	1
ENSMUSG00000018143.10	904.673	1016.87	1033.91	938	699.962	767.952	809	754	569.848	642.965	589.915	604	376	602.926	473	511	710.908	-0.502503	0.0941139	0	1	1	710.908	-0.451679	0.097843	0	1	1
ENSMUSG00000018160.15	8849.7	9075.78	7991.5	6722.72	8097.54	8852.38	8489.74	7587.99	6746.23	8284.71	8436	7461.09	7398.26	9668.7	8147.84	7522.3	8202.93	-0.354823	0.0488274	0	1	1	8202.93	-0.485987	0.048867	0	1	1
ENSMUSG00000018166.8	1545	1583	2466	2093	1824	2111	2438	2518	3147	3744	3452	3137	2800	4286	2919	3140	2686.4	0.105606	0.150185	0	1	1	2686.4	-0.169953	0.149563	0	1	1
ENSMUSG00000018167.10	1063	1151	1062	963	1708	1522	1717	1601	1516	1591	1600	1439	2039	2796	2377	2181	1632.73	0.556002	0.0530285	0	1	1	1632.73	0.563424	0.0506477	0	1	1
ENSMUSG00000018168.8	24	25	29	33	35.0001	29	30	21.9999	143	194	134	142	92.9999	150	79	84	82.1888	-0.40773	0.276979	0	1	1	82.1888	-0.66504	0.220909	0	1	1
ENSMUSG00000018169.12	403	369.066	393.29	358.295	251.017	233.012	317.102	279.004	701	657	579	562	284.209	346	334.096	247	397.803	-0.654787	0.140648	0	1	1	397.803	-1.09949	0.138024	-0.72083	0.471014	1
ENSMUSG00000018171.9	3855	4249	4146	3717	3962	3850	3756	3573	4715	5491	5395	4891	3660	5143	4131	4036	4280.2	-0.230594	0.0573771	0	1	1	4280.2	-0.317846	0.0570074	0	1	1
ENSMUSG00000018189.12	7895.29	8815.95	8350.17	7161.45	4230.85	4280.26	4129.97	3839.28	11091.4	12073	11093.9	10707.9	5375.68	7090.42	6165.72	5548.56	7482.61	-1.15686	0.0462283	-3.39308	0.000691108	0.0377109	7482.61	-1.11857	0.0455959	-2.60042	0.00931084	0.208723
ENSMUSG00000018196.18	1724.34	1928.42	1991.44	1748.64	2272.06	2432.28	2135.41	2006.37	1667.77	1930.05	1848.17	1769.59	1858.41	2471.04	2164.99	2150	2005.08	-0.120438	0.0734649	0	1	1	2005.08	-0.123814	0.0735623	0	1	1
ENSMUSG00000018199.9	3145.8	3203.9	2587.42	2225.83	2876.12	3290.18	2830.8	2782.4	3536.45	4240.82	3693.06	3244.85	4224.59	5945.34	4274.23	4453.39	3495.19	-0.0349992	0.0714519	0	1	1	3495.19	0.229704	0.0706659	0	1	1
ENSMUSG00000018209.15	11236	12174	10840	9538	8166	8434	9110	8487	10245	11537	11000	10274	7189	9477	8151	7487	9691.63	-0.585452	0.0471519	0	1	1	9691.63	-0.609034	0.0472049	0	1	1
ENSMUSG00000018217.12	83	111	90	115	162	172	140	131	56	70	57	65	174	279	197	196	127.931	0.681866	0.173453	0	1	1	127.931	1.45909	0.179969	2.55095	0.0107428	0.236063
ENSMUSG00000018238.6	36	47	54.9999	29	24	23	16	24	23	25	27	45	10	15	15	8	27.8774	-0.932011	0.418721	0	1	1	27.8774	-1.48604	0.445683	-1.09055	0.27547	1
ENSMUSG00000018239.9	6484	7300	5700	5091	3438.98	3556	3584	3453	3540	3925	3648	3713	2283	2777.95	2659.96	2376.36	3999.79	-0.860009	0.058045	0	1	1	3999.79	-0.642048	0.0590204	0	1	1
ENSMUSG00000018263.11	78.4016	95.4255	65.5522	42.7131	47.4464	68.11	31.2603	35.366	66.0222	86.2266	82.1993	75.1585	87.3112	164.468	106.777	157.553	79.036	-0.777336	0.260256	0	1	1	79.036	0.626616	0.244129	0	1	1
ENSMUSG00000018286.6	22896	24724	23727	21967	17472	16361	16667	15221	20906	22447	22452	20907	12860	16578	15145	13221	19133.2	-0.614957	0.0420671	0	1	1	19133.2	-0.729239	0.0421426	0	1	1
ENSMUSG00000018287.12	5568.01	6589.15	6726.78	6202.66	6050.15	5812.26	6209.83	5641.62	6783.47	7626.74	7644.2	7057.81	5966	7396.11	6962.15	6071.05	6524.43	-0.196752	0.062479	0	1	1	6524.43	-0.264555	0.0623219	0	1	1
ENSMUSG00000018293.4	67216	76361	76998	67770	52894	51772	57206	53010	51521	57371	59131	55250	39341	49557	46949.9	38934	56815.3	-0.544545	0.0568576	0	1	1	56815.3	-0.520747	0.0568966	0	1	1
ENSMUSG00000018322.10	7722.03	8332.01	8317.01	7198.01	5346.01	5216	5898	5622.01	6789	7433.01	7353.01	7135	4702.01	5672.01	5538	4850.01	6501.72	-0.637477	0.0566654	0	1	1	6501.72	-0.614439	0.056782	0	1	1
ENSMUSG00000018326.9	23615	25142	23320	20812	15427	15591	15249	14479	21934	25654	24762	22176	14221	19337	16023	15301	19670.4	-0.709131	0.0216967	0	1	1	19670.4	-0.670882	0.0216442	0	1	1
ENSMUSG00000018334.18	1230.66	1400.75	1555.23	1406.31	2153.71	2119.82	2328.54	2066.77	2531.55	2795.64	2760.65	2707.46	2182.35	2612.16	2224.89	1830.92	2117.38	0.677618	0.123101	0	1	1	2117.38	-0.316275	0.122374	0	1	1
ENSMUSG00000018339.11	1400	1385	932	930	675	702	751	709	1412	1543	1391	1290	762	928	865	769	1029.47	-0.780714	0.101462	0	1	1	1029.47	-0.802491	0.100548	0	1	1
ENSMUSG00000018340.13	10950	11982	12085	10610	13584	13112	12464	11771	10558	11941	12058	11008	13840	18036	15497	14021	12640.4	0.0611052	0.0431794	0	1	1	12640.4	0.302549	0.0431029	0	1	1
ENSMUSG00000018341.12	6.13431	9.56078	11.6362	9.60241	5.49711	10.7184	4.34682	2.17948	3.1766	3.13714	5.34967	7.43024	4.39395	16.9358	5.47407	3.33013	6.56656	-0.88538	0.632189	0	1	1	6.56656	0.492083	0.663047	0	1	1
ENSMUSG00000018347.16	641	774	773	731	991	1051	981	830	588	639	641	643	763	910	868	829	787.784	0.298411	0.0813242	0	1	1	787.784	0.298917	0.0825189	0	1	1
ENSMUSG00000018362.14	1489.79	1814.45	1447.91	1253.9	1253.13	1210.64	1293.84	1285.63	1382.62	1547.88	1535.18	1532.67	1082.87	1275.22	1088.93	1079.1	1347.87	-0.100942	0.0761593	0	1	1	1347.87	-0.480361	0.07648	0	1	1
ENSMUSG00000018363.16	4221	4561	3614	3256	4533.99	4777	4711	4521	4167	4900	4628	4205	4357	6123	4848	4720	4478.14	0.131676	0.0601603	0	1	1	4478.14	0.0383019	0.0599577	0	1	1
ENSMUSG00000018372.13	1539	1775	1503	1311	2785	2814	2701	2414	1565	1913	2003	1920	3456	4608	3939	3666.99	2476.03	0.827537	0.0770198	0	1	1	2476.03	1.01019	0.0762408	0.133595	0.893723	1
ENSMUSG00000018377.10	1273.85	1407.98	1017.05	904.495	1511.78	1670.21	1573.6	1392.66	1471.16	1808.79	1472.73	1313.23	2282.23	3474.86	2698.19	2743.85	1718.62	0.331444	0.0902464	0	1	1	1718.62	0.75242	0.0887807	0	1	1
ENSMUSG00000018378.13	222	224.5	219.5	184	324.5	303	286	298	460	462	387	398	740.5	1096.5	827.5	810.999	465.406	0.499975	0.107978	0	1	1	465.406	1.2106	0.0964959	2.18243	0.0290777	0.516428
ENSMUSG00000018379.17	26199.5	29467.5	28436	24611.9	21839.5	23148	24367.5	22837	26477	31674	31656.5	29215.5	20045.5	25290.5	22401.5	20899	25493.5	-0.296526	0.0618022	0	1	1	25493.5	-0.366112	0.0617975	0	1	1
ENSMUSG00000018381.15	293.156	277.01	346.142	316.99	450.628	444.73	415.327	373.805	587.906	750.127	831.287	722.816	527.753	671.566	628.473	562.535	508.103	0.502041	0.12715	0	1	1	508.103	-0.233861	0.121847	0	1	1
ENSMUSG00000018387.12	65.921	76.8529	56.8293	45.4033	51.3898	58.6126	32.9869	42.3402	68.6428	78.9816	84.4517	68.2699	50.5612	74.5495	59.1169	56.6934	60.9126	-0.385578	0.198535	0	1	1	60.9126	-0.402773	0.187591	0	1	1
ENSMUSG00000018395.19	1216.78	1279.91	1520.47	1304.68	1377.91	1421.56	1482.01	1300.96	2387.63	2881.01	2664.77	2494.64	1984.92	2763.45	2364.48	2297.2	1921.19	-0.097741	0.0795042	0	1	1	1921.19	-0.293722	0.0773388	0	1	1
ENSMUSG00000018398.18	1581	1615	1814	1639	1684	1814	1829	1781	3170	3744	3391	3135	2867	3962	3158	3228	2486.6	-0.071761	0.0831255	0	1	1	2486.6	-0.183936	0.0813555	0	1	1
ENSMUSG00000018401.17	5131	5617	4609	4263	4810	5181	5463	5117	5421	6339	6113	5450	5131	6634	5755	4817	5358.21	-0.0309484	0.067396	0	1	1	5358.21	-0.172431	0.0672164	0	1	1
ENSMUSG00000018405.7	1069	1213	1547	1418	1841	1785	1745	1637	953	958	1023	953	980	1303	1239	1043	1295.05	0.0418888	0.102415	0	1	1	1295.05	-0.0155108	0.103841	0	1	1
ENSMUSG00000018411.17	2301	2268	2890	2599	7007	6994	5501	5121	4039	4666	5501	4827	5867	6675	5863	5028	4688.02	0.926756	0.115537	0	1	1	4688.02	0.127275	0.115136	0	1	1
ENSMUSG00000018412.16	12552	12862	10288	8963	14072	14920	14234	13630	11238	13335	13230	11618	17127	23854	19500	18591	14248.4	0.299266	0.0520703	0	1	1	14248.4	0.611634	0.0519275	0	1	1
ENSMUSG00000018415.14	6415.31	7041.8	6193.69	5449.32	10416.1	10324.1	11085.8	10392.2	6526.2	7458.32	7098.39	6479.65	11118	14645	13139.3	12079.3	8979.94	0.632218	0.0370081	0	1	1	8979.94	0.757023	0.0367958	0	1	1
ENSMUSG00000018417.14	5691.59	5838.31	5245.33	4917.2	6975.35	7580.73	6845.2	6605.13	13925.7	16464.8	15168.5	13601.6	16870.4	23874.1	17532.6	17867.9	11430.3	0.393733	0.0529688	0	1	1	11430.3	0.30099	0.0519434	0	1	1
ENSMUSG00000018425.18	6260.77	6636.11	6150.9	5286.67	6713.91	7056.17	7047.6	6445.7	6695.85	7405.89	6849.94	6648.98	6816.91	8865.86	7829.87	7125.71	6832.65	0.0573774	0.030741	0	1	1	6832.65	0.0187833	0.0304438	0	1	1
ENSMUSG00000018427.7	701	797	519	423	1338	1560	1334	1213	750	877	803	784	2262	2921	2576	2458	1298.08	1.07596	0.106823	0.71112	0.47701	1	1298.08	1.54329	0.104968	5.1758	2.26937e-07	1.49291e-05
ENSMUSG00000018428.15	16772	18253	18317	16650	19999	20250.9	20913	19300	23745	27544	27575	25043	27534	37963	32317	30945	23768.4	0.150486	0.0350359	0	1	1	23768.4	0.26202	0.0347601	0	1	1
ENSMUSG00000018433.14	16593.1	17705	15175.1	13461	10508	11070	10619	10303	12099	13897	13399	12883	8797.95	11230	10152	9020.99	12377.2	-0.660136	0.035061	0	1	1	12377.2	-0.548376	0.0352206	0	1	1
ENSMUSG00000018442.13	2684.19	2839.06	2833.4	2548.84	2601.51	2612.97	2591.05	2465.09	2186.36	2511.34	2414.21	2280.91	1972.82	2630.3	2251.74	2164.46	2507.11	-0.499417	0.0643735	0	1	1	2507.11	-0.48751	0.0648478	0	1	1
ENSMUSG00000018446.8	36093.4	38910	36369.7	32691.4	24004.1	23331.5	23755.2	22205	30210.5	33203.7	32718.2	31467.7	19966.4	25192	23881.4	20770.8	28646.1	-0.730171	0.0334058	0	1	1	28646.1	-0.638699	0.0334492	0	1	1
ENSMUSG00000018449.12	851	885.001	775.999	713.001	1147	1107	1005	953.001	804.001	928	829	706	1223	1747	1495	1414	1034.81	0.373914	0.0915751	0	1	1	1034.81	0.831888	0.0907849	0	1	1
ENSMUSG00000018451.6	106	111	131	102	120	131	115	101	68	88	69	67	82	100	97	67	97.0979	-0.0476275	0.143208	0	1	1	97.0979	0.113094	0.156868	0	1	1
ENSMUSG00000018459.15	5	7	8	4	4	3	9	7	9	11	14	12	15	11	10	10	10.0844	-0.702382	0.636546	0	1	1	10.0844	-1.12392	0.572997	-0.216258	0.828787	1
ENSMUSG00000018470.8	91.9999	103	171	157	265	261	206	206	563	713	668	621	374	536	467	482	360.61	0.821477	0.187287	0	1	1	360.61	-0.490133	0.175662	0	1	1
ENSMUSG00000018474.17	1000	1040	1206	1129	2340	2593	2678	2548	1108	1169	1112	1173	2439	3896	2805	2806	1875.66	0.902278	0.0895376	0	1	1	1875.66	1.23482	0.0892639	2.63065	0.00852208	0.193506
ENSMUSG00000018476.7	5222.8	5738.79	5486.62	4597.57	6559	7501.99	7556.96	6986.98	9404.88	11189.5	9855	9290.78	8848.99	11268	9529	8326	7883.72	0.345184	0.051051	0	1	1	7883.72	-0.189398	0.0504167	0	1	1
ENSMUSG00000018479.12	2	5	3	6	2	2	3	2	4	6	6	3	4	4	6	1	3.77556	-1.1988	0.779166	-0.255145	0.798611	1	3.77556	-0.395399	0.701476	0	1	1
ENSMUSG00000018481.9	12526.6	13150.9	12545.4	10799.1	8945.22	9683.94	9737.27	9133.76	13125.6	15502.5	15109.8	13794.5	9751.99	12408.1	10288.7	9503.99	11658.4	-0.478526	0.0365467	0	1	1	11658.4	-0.58077	0.036385	0	1	1
ENSMUSG00000018486.2	8	9	8	8	14	12	7	6	2	7	4	2	2	7	2	4	6.33223	0.140873	0.522823	0	1	1	6.33223	-0.134779	0.661779	0	1	1
ENSMUSG00000018500.2	244	310	259	232	366	343	353	338	268	267	210	205	191	265	217	176	264.871	0.327662	0.106876	0	1	1	264.871	-0.299375	0.112261	0	1	1
ENSMUSG00000018501.17	37669.9	38006	31267.9	27798.5	42115.1	44556.5	43427.7	39963.5	26447.7	33365.6	33523.8	29091.1	42271.8	58652.6	45596.4	42253.4	38146.2	0.288845	0.058314	0	1	1	38146.2	0.509638	0.0583173	0	1	1
ENSMUSG00000018507.16	349.021	425.648	383.269	324.121	166.809	194.696	128.918	120.693	254.679	253.733	192.716	226.255	95.776	155.539	111.022	89.5562	216.973	-1.18258	0.133758	-1.36498	0.172258	1	216.973	-1.18091	0.141309	-1.28022	0.200467	1
ENSMUSG00000018509.8	2870	3098	2753	2402	3560	3574	3374	3123	3662	3730	3679	3601	3164	3788	3709	3057	3309.49	0.226142	0.0554504	0	1	1	3309.49	-0.135538	0.0550344	0	1	1
ENSMUSG00000018537.16	7624.74	8366.17	7481.83	6907.34	12050.6	12172.7	12661	11723.5	9200.03	10755.7	10217.2	9493.18	12017.5	16022.6	15131.6	13598.6	10844.9	0.570501	0.0358563	0	1	1	10844.9	0.395055	0.0355486	0	1	1
ENSMUSG00000018541.10	2979.33	3466.75	3209.39	2757.98	3421.67	3617.86	3511.12	3202.23	3618.05	4129.5	3922.86	3448.45	3397.49	4591.9	3882.24	3469.91	3522.35	0.0429352	0.0403989	0	1	1	3522.35	-0.101748	0.0398407	0	1	1
ENSMUSG00000018543.8	50	30	64	65	49	54	41	36	27	36	30	50	17	35	20	22	39.6288	-0.349189	0.296592	0	1	1	39.6288	-0.768588	0.321884	0	1	1
ENSMUSG00000018547.8	11230.9	12097.5	11102	10017.3	9569.35	10318.6	9808.15	9173.07	11156.5	13117	12677.3	11668.3	8974.1	11494	10206.9	9227.12	10746.9	-0.27377	0.0300346	0	1	1	10746.9	-0.394754	0.0299501	0	1	1
ENSMUSG00000018548.15	8300.22	8702.24	8305.65	7173.92	8990.43	9523.15	9604	8919.26	10482.4	12084.2	11607.4	10610.9	8756.43	11203.6	9650.05	8674.93	9560.16	-0.0270032	0.0374322	0	1	1	9560.16	-0.522037	0.0371754	0	1	1
ENSMUSG00000018554.13	496.001	523	555	503	1410	1338	1558	1449	742	749	683.999	638	1101	1642	1520	1514	1024.43	1.43575	0.0835603	5.2148	1.84012e-07	2.27221e-05	1024.43	1.07613	0.0819948	0.928515	0.35314	1
ENSMUSG00000018559.16	4062	4361	4504	3914	4575	4728	4543	4353	4482	4977	5043	4428	4168	5799	4874	5050	4601.63	-0.00274762	0.0485476	0	1	1	4601.63	-0.0557547	0.0483167	0	1	1
ENSMUSG00000018565.17	6040.56	6109.66	6604.16	6257	6256.32	5994.89	5787.58	5467.17	6107.19	7002.86	6666.02	6024.23	4672.1	5800.79	5390.71	4767.14	5962.14	-0.233436	0.0630862	0	1	1	5962.14	-0.465288	0.0631722	0	1	1
ENSMUSG00000018566.14	67	75	86	73	223	230	218	214	181	186	141	139	234	288	301	335	189.08	1.69563	0.199259	3.49107	0.000481096	0.027532	189.08	0.691316	0.188079	0	1	1
ENSMUSG00000018567.14	4346	4497	3998	3583	5648	5433	5271	4889	4202	4975	4707	4442	6385	9586	7724	7635	5399.97	0.330238	0.0474493	0	1	1	5399.97	0.698334	0.0469821	0	1	1
ENSMUSG00000018569.12	202	243	304	251	263	270	427	412	330	345	256	284	334	634	469	542	342.919	0.348034	0.223771	0	1	1	342.919	0.438573	0.221975	0	1	1
ENSMUSG00000018570.17	299	260	325	282	630	606	626	560	267	305	232	289	370	572	477.999	453	405.602	1.02154	0.114959	0.187404	0.851344	1	405.602	0.564991	0.116585	0	1	1
ENSMUSG00000018572.10	9939.01	11424	10164	9284	12327	12210	12236	11289	11080	11595	11346	10676	11742	14877	13556	12145	11564.7	0.15574	0.0353969	0	1	1	11564.7	0.108985	0.0352863	0	1	1
ENSMUSG00000018574.14	1881.72	2112.68	2223.6	2196.4	2376.68	2299.16	2234.04	1981.46	3231.51	3315.53	3134.95	2812.55	1700.54	2100.07	1765.3	1582.49	2302.08	-0.0209339	0.076739	0	1	1	2302.08	-0.766923	0.0765963	0	1	1
ENSMUSG00000018581.15	167.02	146.567	157.077	108.253	245.163	269.515	238.938	250.675	41.2387	30.1697	28.0259	41.4671	94.0031	128.413	93.5042	83.6023	126.415	0.380353	0.27224	0	1	1	126.415	1.36999	0.296743	1.24682	0.212462	1
ENSMUSG00000018583.5	62411.3	68613	73263.2	67212.1	61070.6	61994.1	66531.2	61952.8	70670.5	80085.2	80502.7	74764.2	46451.4	57057.8	53938.9	46333	64701.2	-0.287185	0.0439088	0	1	1	64701.2	-0.621482	0.043922	0	1	1
ENSMUSG00000018585.9	7976	8641	8225	7664	4548	4246	4945	4352	6027	6542	6687	6050	2091	2680	2403	1935	5411.18	-0.956593	0.0555307	0	1	1	5411.18	-1.62161	0.0567244	-10.9584	6.05379e-28	3.118e-25
ENSMUSG00000018589.8	3.07149	0	2.18755	2	4.17632	5.13155	2.21932	3.02451	1.0061	2.00127	1.09873	0	3.02172	3.11366	0	1.04998	1.98805	0.886011	0.987408	0	1	NA	1.98805	0.690877	1.1643	0	1	NA
ENSMUSG00000018593.13	18920.2	21830.5	26085.9	24991	20235	22582.3	18642.5	19046.4	22018.4	26817.3	29792.9	25406.1	16832	24776.9	19775.6	19501.5	22383.3	-0.281424	0.10609	0	1	1	22383.3	-0.492289	0.106079	0	1	1
ENSMUSG00000018595.6	11	12	20	21	33	23.9999	14	26.9999	17	14	10	10	19.0001	12	15	18	17.4251	0.498049	0.387326	0	1	1	17.4251	0.219437	0.411585	0	1	1
ENSMUSG00000018599.5	1003.6	1133.14	1185.64	1105	1235	1280.63	1240	1238	1974.94	2231.58	2209	2052	1803.8	2355	2028	1999.61	1612.19	0.198822	0.0600663	0	1	1	1612.19	-0.0063473	0.0567705	0	1	1
ENSMUSG00000018604.18	13515	13940	14894	13404	24837	28265	24789	23926	25335	31743	30429	28169	49476	68397	52508	52406	29882.5	0.705128	0.0632833	0	1	1	29882.5	0.815081	0.0630431	0	1	1
ENSMUSG00000018620.3	10	10	12	20	4	4	4	6	7	5	4	4	3	1	2	2	6.39411	-1.64654	0.565124	-1.14407	0.252594	1	6.39411	-1.43911	0.725437	-0.605307	0.544975	1
ENSMUSG00000018634.10	8	5	7	3	9	6	10	13	3	3	7	8	12	13	16	11	8.26461	0.640721	0.515186	0	1	1	8.26461	1.18016	0.50892	0.354006	0.723334	1
ENSMUSG00000018648.15	446	435	652	668	372	375	348	356	667	758	790	688	291	373	278	240	493.616	-0.763746	0.166305	0	1	1	493.616	-1.45507	0.166695	-2.72995	0.00633434	0.152697
ENSMUSG00000018651.14	5546	5883	5790	5055	4896	4910	5190	4904	5543	6216	6237	5910	4666	6150	5531	5019	5462.8	-0.270648	0.0358905	0	1	1	5462.8	-0.21314	0.0357123	0	1	1
ENSMUSG00000018654.17	50	48.0001	46.9999	42	76	63	65	65	16	13	17	20	20	24	10	17	39.7266	-0.0512936	0.271063	0	1	1	39.7266	-0.307595	0.340521	0	1	1
ENSMUSG00000018659.12	2416	2375	2443	2200	2681	2534	2454	2239	2992	3499	3405	2951	2463	3096	2985	2606	2704.96	-0.022647	0.0532191	0	1	1	2704.96	-0.319663	0.0524557	0	1	1
ENSMUSG00000018661.17	3507.74	3705.9	4442.51	3930.21	4868.2	4854.95	4972.64	4791.82	3686.53	4411.45	4476.88	4085.68	4483.4	5683.56	5019.23	4556.09	4446.74	0.209621	0.0636509	0	1	1	4446.74	0.140769	0.0635828	0	1	1
ENSMUSG00000018666.13	31098.4	35868	34618.5	31085.3	25016	26178.9	28255.2	26831.5	26340.6	28130.1	27412.2	26145.2	18690.3	21638	20332.9	17764.8	26757.3	-0.403716	0.0612129	0	1	1	26757.3	-0.571814	0.0613001	0	1	1
ENSMUSG00000018669.14	6669	7249	7289.99	6412	8164	7882	8095	7547	7506	8219	8082	7344	6997	8946	8063.01	7386	7613.28	0.213872	0.0427793	0	1	1	7613.28	0.0222793	0.0426925	0	1	1
ENSMUSG00000018672.15	51	54.0001	51	52	76	76	90	82	76.8738	87	65	69	67	82.7822	60	73	69.5222	0.586161	0.181482	0	1	1	69.5222	-0.0938018	0.175681	0	1	1
ENSMUSG00000018677.9	18131	19696	18701	16937	18168	16812	16583	15547	33337	37860	35357	31520	25380	37057	29516	28691	24751.6	-0.294568	0.0431622	0	1	1	24751.6	-0.360426	0.0428504	0	1	1
ENSMUSG00000018678.13	6796.01	7278	6185	5659	6515	6611	6880	6452	6053	6964	7644	7132	6423.01	8601	7942	7186.99	6869.52	-0.0539127	0.055685	0	1	1	6869.52	-0.00249663	0.055553	0	1	1
ENSMUSG00000018697.14	7739	8728	8181	7139	5375	5378	5528	5139	5347	5734	6588	5882	4868	6052	6028	5056	6203.05	-0.66429	0.0574565	0	1	1	6203.05	-0.234312	0.0576381	0	1	1
ENSMUSG00000018698.15	13	16	15	4	5	13	13	4	10	1	7	9	0	4	1	3	7.98656	-1.08212	0.786876	-0.104364	0.91688	1	7.98656	-1.69312	0.92672	-0.74793	0.454502	1
ENSMUSG00000018707.13	41972.8	37548.7	31049.8	26824.4	51312.7	55518.8	55416.5	50095.1	43235.7	53585.9	46419.2	39408.5	58283.1	83964.7	59000	57828.3	48624.2	0.448165	0.0891293	0	1	1	48624.2	0.387841	0.0890987	0	1	1
ENSMUSG00000018727.19	1344	1406	1664	1508	2927	2678	2754.99	2511	966	1238	1440	1214	3319.99	4292	3819.99	3378	2244.2	0.78097	0.0943167	0	1	1	2244.2	1.51722	0.0944741	5.47478	4.38063e-08	3.28034e-06
ENSMUSG00000018733.10	1494.23	1544.84	1459.08	1221.79	1423.31	1399.84	1312.15	1164.92	941.115	1016.45	1100.61	1067.55	944.744	1272.59	1042.22	941.669	1209.73	-0.242959	0.0664535	0	1	1	1209.73	-0.0226909	0.0682719	0	1	1
ENSMUSG00000018736.14	2317.76	2682.31	2132.68	1960	2832.06	2875.21	2923	2748	2092.36	2537.12	2138	2004.1	2760	3814	3198.84	3214.13	2613.38	0.200513	0.0589164	0	1	1	2613.38	0.425876	0.0588057	0	1	1
ENSMUSG00000018740.14	358.307	446.82	487.932	414.529	335.598	314.369	323.303	306.371	430.756	517.06	601.167	488.827	402.615	589.2	433.131	425.946	431.184	-0.393499	0.148619	0	1	1	431.184	-0.276974	0.146292	0	1	1
ENSMUSG00000018750.14	80	82.0001	59	63	173	180	109	141	193	211	222	191	604	909	613	699	269.629	0.907679	0.212124	0	1	1	269.629	1.78338	0.193145	4.0559	4.99415e-05	0.00214353
ENSMUSG00000018752.19	1136.31	1140.55	928.504	882.139	1088.89	1183.64	1227.32	920.916	845.06	902.342	759.502	811.801	617.892	665.43	535.152	486.229	886.793	-0.0657907	0.105407	0	1	1	886.793	-0.697054	0.107979	0	1	1
ENSMUSG00000018761.14	8365.34	8998.53	10316.9	9564.69	8498.52	8154.34	8976.55	8043.74	6053.07	6698.31	6707.99	6057.27	4086.68	5260.45	4959.29	4257.9	7214.04	-0.25858	0.0654561	0	1	1	7214.04	-0.495226	0.0660434	0	1	1
ENSMUSG00000018765.5	22721	26053	23468	20802	21504	21542	22868	20835	23065	24732	22466	21575	22389	29716	25326	23030.6	23193.1	-0.10208	0.0394944	0	1	1	23193.1	0.112905	0.0394587	0	1	1
ENSMUSG00000018770.9	27630	31454	30500	27008	14992	15492	15131	13422	31336	33764	33640	32463	12996	16215	14594	13407	23113	-1.09596	0.0423845	-2.26403	0.0235721	0.762284	23113	-1.3456	0.042377	-8.1553	3.48315e-16	7.35536e-14
ENSMUSG00000018774.13	1420	1600	1485	1269	1005	977	953	883	861	1102	1022	960	735	1028	694	730	1047.17	-0.694912	0.0795049	0	1	1	1047.17	-0.293186	0.0812488	0	1	1
ENSMUSG00000018776.10	10	21	9	9	24	22	13	18	16	19	23	15	18	19	23	15	16.9311	0.526896	0.361903	0	1	1	16.9311	-0.0663814	0.342587	0	1	1
ENSMUSG00000018796.13	2116.17	2109.21	2158.37	1973.09	2625.07	2687.32	2606.03	2365.11	3085.09	3318.03	3286.11	3042.08	2430.21	3239.23	2804.42	2595.34	2647.48	0.227373	0.0406493	0	1	1	2647.48	-0.356555	0.0394167	0	1	1
ENSMUSG00000018800.14	396.323	420.363	463.263	415.341	601.059	696.06	568.079	501.999	369.019	476.027	443.012	347	850.008	1248	845.029	891	573.005	-0.0760187	0.118996	0	1	1	573.005	0.912468	0.117781	0	1	1
ENSMUSG00000018809.2	2916.64	3008.38	3164.39	2993.99	3257.26	3303.13	3112.85	2865.69	3184.8	3595.44	3508.28	3340.33	2429.15	3299.41	2848.47	2606.89	3090.59	-0.0950879	0.0442719	0	1	1	3090.59	-0.380985	0.0443026	0	1	1
ENSMUSG00000018819.10	23	15	28	19	8	10	20	16	6	3	5	6	11	8	8	4	12.4106	-0.950807	0.420934	0	1	1	12.4106	-0.234259	0.532732	0	1	1
ENSMUSG00000018820.13	2544.44	2681.12	2346.5	1934.16	4119.72	4306.45	4246.6	3883.85	2546.6	2917.43	2477.73	2381.24	4592.93	6276.89	5441.9	5437.81	3688.53	0.92114	0.0743152	0	1	1	3688.53	1.25133	0.0739928	3.39666	0.000682128	0.0221608
ENSMUSG00000018821.3	4116	4441	3870	3566	2285	2333	2474	2223	2361	2630	2471	2444	1480.99	2048	1698	1667	2661.19	-0.885458	0.03861	0	1	1	2661.19	-0.661427	0.0406359	0	1	1
ENSMUSG00000018822.7	420	489	580	547	398	410	417	347	477	589	633	641	674	642	673	519	529.479	-0.481857	0.138429	0	1	1	529.479	-0.0179323	0.13616	0	1	1
ENSMUSG00000018830.10	54.0017	56.0017	47.0016	39.0016	18	40	34.0009	34	66	65	46	31	22	39	16	17.0015	39.2925	-0.704005	0.303118	0	1	1	39.2925	-1.31387	0.311896	-1.00633	0.314258	1
ENSMUSG00000018841.17	1438	1448	1338	1255	1271	1218	1300	1217	1572	1877.01	1712	1556	1178	1474	1301	1184	1400.56	-0.239663	0.0549149	0	1	1	1400.56	-0.572459	0.0542034	0	1	1
ENSMUSG00000018844.6	5.00046	14	6	8	5	20	9	4	12	5	9	20	5	10	6	7	9.07677	0.100233	0.593273	0	1	1	9.07677	-0.881896	0.594326	0	1	1
ENSMUSG00000018845.14	263	262	211	199	138	153	128	127	203	217	194	198	107	124	133	111	175.557	-0.442449	0.171384	0	1	1	175.557	-0.887569	0.173868	0	1	1
ENSMUSG00000018846.8	4736	4862	4873	4170.77	5030	5693	4652	4545	5787	7016	6448	6137	5010	6867	5018	5142	5358.71	0.000549112	0.0594429	0	1	1	5358.71	-0.332429	0.059115	0	1	1
ENSMUSG00000018848.4	26708	27946	26131	23208	19401	19300	19561	18600	24691	28457	27835	25379	19393	25516	23133	20672	23543	-0.524507	0.0238254	0	1	1	23543	-0.380452	0.0237439	0	1	1
ENSMUSG00000018849.6	5105	5779	5981	5371	6399	6517	7623	6877	11553	13967	13793	11742	12856	21360	15267	17051	10317.4	0.155477	0.0803069	0	1	1	10317.4	0.269567	0.079701	0	1	1
ENSMUSG00000018858.15	3979	4394	4067	3664	3102	2935	3089	2791	3098	3323	3385	3017	2287	3214	2920	2515.99	3252.87	-0.523397	0.0467488	0	1	1	3252.87	-0.392616	0.0472892	0	1	1
ENSMUSG00000018861.8	1117.24	1182	1287.22	1068.2	1420.73	1341.96	1327.66	1266.7	1783.43	1873.44	1781.26	1487.55	1747.73	2345.38	2102.26	1959.04	1556.11	0.102873	0.0620645	0	1	1	1556.11	0.14361	0.0597801	0	1	1
ENSMUSG00000018862.11	0	0	5	0	2	1	1	3	3	0	3	0	0	1	0	0	1.20217	0.416404	1.72629	0	1	NA	1.20217	-2.44713	1.91025	-0.757561	0.448714	NA
ENSMUSG00000018865.9	5745	6524	5541	5044	5376	5278	5184	4916	5272	5909	6224	5763	4179	5150	5084	4257	5356.04	-0.254903	0.0548327	0	1	1	5356.04	-0.422859	0.0549283	0	1	1
ENSMUSG00000018868.4	11	9	5	11	2	9	7	8	4	5	7	4	2	0	4	5	5.93837	-0.446222	0.623265	0	1	1	5.93837	-0.953022	0.736229	0	1	1
ENSMUSG00000018882.12	14300.8	15316.7	13640.6	12581.1	7119.74	6908.88	7735.16	6974.78	8748.2	9462	9577.22	9103.47	4668.91	6535.05	5971.64	5193.01	9165.73	-1.11374	0.0521439	-2.1813	0.0291613	0.912296	9165.73	-0.857839	0.0525345	0	1	1
ENSMUSG00000018893.15	18	15	31	27	72	48	77	63	18	22	40	25	8	17	11	17	31.8987	1.45321	0.317505	1.42743	0.153457	1	31.8987	-1.45824	0.35892	-1.27673	0.201698	1
ENSMUSG00000018899.16	1507.03	1686	1649.02	1557.04	3006.01	2976.08	3707.98	3404	3272.21	3816.98	3397.07	3336.13	3536.14	4556.04	3933.03	3507.14	3027.03	0.948917	0.083841	0	1	1	3027.03	0.0575093	0.0826527	0	1	1
ENSMUSG00000018900.7	464.239	512.103	571.883	496.278	835.979	807.365	835.947	813.894	607.658	710.229	723.724	605.575	845.425	1136.17	956.732	965.625	732.21	0.515537	0.0741852	0	1	1	732.21	0.374232	0.071961	0	1	1
ENSMUSG00000018906.14	1094.89	1276.3	865.288	948.496	1256.55	1450.95	907.248	933.157	1021.6	1018	694.046	863.267	611.006	755.363	674.249	592.335	936.856	0.228332	0.137596	0	1	1	936.856	-0.375077	0.139121	0	1	1
ENSMUSG00000018907.10	31	32	78	85	52	55	46	52	20	19	18	13	21	38	30.0001	15	38.3894	-0.262409	0.356448	0	1	1	38.3894	0.459471	0.397593	0	1	1
ENSMUSG00000018909.15	1463.49	1413.25	1361.66	1103.75	829.406	890.492	1038.03	977.439	1221.24	933.146	794.765	1108.61	731.354	661.493	793.484	491.148	1025.48	-0.715875	0.261851	0	1	1	1025.48	-0.788305	0.262508	0	1	1
ENSMUSG00000018914.5	6	9	4	4	10	11	9	8	0	2	0	0	2	2	1	1	4.2848	0.625186	0.590893	0	1	1	4.2848	1.45817	1.25246	0.365816	0.714503	1
ENSMUSG00000018919.10	151	229	275	257	284	256	290	215.001	332	352	304	323	93	90	111	82	227.913	-0.144551	0.173806	0	1	1	227.913	-1.77511	0.181839	-4.26259	2.02072e-05	0.000931692
ENSMUSG00000018920.11	114.237	147.081	103.238	112.612	145.209	166.088	203.848	175.696	180.692	163.715	161.207	152.293	87.3006	157.715	125.925	111.253	144.473	0.441586	0.166008	0	1	1	144.473	-0.618347	0.16668	0	1	1
ENSMUSG00000018921.11	27703	29131	27911	24891	24405	24229.8	25339	23528	24968	27427	27071	25460	19099.7	24387	22811	19581	24971.5	-0.304297	0.0318861	0	1	1	24971.5	-0.428351	0.0319478	0	1	1
ENSMUSG00000018923.13	1606	1837	1718	1544	1244	1313	1369	1171	1592	1676	1657	1574	969	1288	1192	981	1430.21	-0.503716	0.0523967	0	1	1	1430.21	-0.699412	0.0531003	0	1	1
ENSMUSG00000018924.6	239	286	320	301	277	298	292	308	148	137	144	137	84	92	107	95	205.609	-0.0939374	0.129039	0	1	1	205.609	-0.639991	0.149243	0	1	1
ENSMUSG00000018925.3	13	8	13	16	25	16	14	21	0	1	4	5	10	13	4	3	10.4007	0.492581	0.498036	0	1	1	10.4007	1.44028	0.676751	0.650586	0.515314	1
ENSMUSG00000018927.3	14	12.9773	6	6	13	12	19	10	4	1	5	1	7.916	5	4	1	7.57185	0.44281	0.52947	0	1	1	7.57185	0.452996	0.706281	0	1	1
ENSMUSG00000018931.3	6506	6623	5418	4928	9772	9788	9146	8492	5448	6496	6682	5917	10312	13818	12384	10974	8156.52	0.537821	0.0585464	0	1	1	8156.52	0.813413	0.0584102	0	1	1
ENSMUSG00000018932.9	5429	5902	5931	5375	6453	6359	6383	5676	6050	7027	6714	6002	5212	6823	5800	5419	6026.41	0.0243947	0.0433284	0	1	1	6026.41	-0.256129	0.0432753	0	1	1
ENSMUSG00000018965.11	25766.9	28140	26967	24849.8	31319	31366.9	31908.9	29623.8	23352	26425	27241	25669.9	22233	27429	26042	21510	26854.4	0.139966	0.0461736	0	1	1	26854.4	-0.19627	0.0462323	0	1	1
ENSMUSG00000018973.2	53	59.7488	48	44.1645	43	30.4344	36.6321	40.5859	26	34	27.3134	28	26	38	27.8613	34	37.7005	-0.592962	0.21533	0	1	1	37.7005	0.00149814	0.239039	0	1	1
ENSMUSG00000018974.7	17647	19558	18071	15536	16303	16400	17477	15910	14293	16090	15982	15325	12885	15613	14716	12745	15903.7	-0.176502	0.0423135	0	1	1	15903.7	-0.221311	0.0424343	0	1	1
ENSMUSG00000018983.9	1843	2025	1904	1611	2361	2419	1916	1755	3103	3663	3221	2974	2002	2394	2463	2034	2325.7	0.144533	0.0900862	0	1	1	2325.7	-0.449754	0.089341	0	1	1
ENSMUSG00000018986.10	114.875	157.054	130.03	104.18	148.804	145.68	149.804	127.174	58.7684	60.5785	63.3146	49.911	82.7595	114.422	91.2226	41.243	102.921	0.0614762	0.185256	0	1	1	102.921	0.274019	0.204668	0	1	1
ENSMUSG00000018995.12	1043.08	1183.01	1118.02	1005.01	1238.05	1294.01	1303.01	1219.01	1356.01	1313.03	1354.01	1207	1188	1557.02	1296.04	1267.04	1246.32	0.0327251	0.0896478	0	1	1	1246.32	-0.149627	0.0891112	0	1	1
ENSMUSG00000018999.14	3456.01	3649.14	3298.54	2956.05	3551.5	3717.92	3638.49	3487.16	5478	6878	6714.53	5933.7	5967.86	8188.79	6647.84	6308.03	4902.11	-0.0384621	0.0561811	0	1	1	4902.11	-0.0344739	0.0549177	0	1	1
ENSMUSG00000019027.8	69	72	56	78	218	219	243	178	359	362	261	256	375	536	489	465	265.371	1.74017	0.160626	4.60805	4.06462e-06	0.00039193	265.371	0.506068	0.136337	0	1	1
ENSMUSG00000019039.14	4214.18	4516.57	5121.6	4618.6	7799.05	7521.07	7261.18	6786.93	3464.32	3859.76	3729.43	3295.32	5442.89	8057.91	6813.69	6654.67	5526.44	0.503013	0.0656542	0	1	1	5526.44	0.897074	0.0659564	0	1	1
ENSMUSG00000019054.13	4309	4594	4236	3898	4276	3958	4289	3811	4047	4549	4272	4303	3359	4541	3954	3623	4126.61	-0.157575	0.0401551	0	1	1	4126.61	-0.261547	0.0402442	0	1	1
ENSMUSG00000019055.15	1391.4	1563.78	1771.15	1631.01	3000.5	3051.64	2654.49	2517.76	3577.32	3960.38	3706.73	3336.2	3327.05	4609.58	3767.22	3780.93	2934.76	0.662894	0.07894	0	1	1	2934.76	-0.0805841	0.077445	0	1	1
ENSMUSG00000019066.13	863.877	845.194	835.36	754.141	1198.42	1226.88	1167.92	1101.48	533.252	495.385	471.851	523.327	474.22	592.373	491.43	508.332	759.405	0.270538	0.0742291	0	1	1	759.405	-0.334978	0.0804761	0	1	1
ENSMUSG00000019080.8	400.162	477.881	483.084	412.914	796.033	788.939	695.968	591.669	412.324	489.792	407.048	388.59	523.611	808.42	664.651	537.018	550.423	0.526828	0.111055	0	1	1	550.423	0.54483	0.111827	0	1	1
ENSMUSG00000019082.18	2048	2143	2182	1985	1487	1511	1688	1503	2488	2791	2751	2606	1788	2321	2235	2179	2112.28	-0.51301	0.0817002	0	1	1	2112.28	-0.434457	0.0808146	0	1	1
ENSMUSG00000019087.13	3879	4030	3970	3488	5051	5126	5173	4803	3468	4253	3834	3547	4853	7031	5747	5735	4590.62	0.313704	0.0594506	0	1	1	4590.62	0.556906	0.0593584	0	1	1
ENSMUSG00000019088.13	82	65	74	54	99	101	76	82.9999	115	121	107	98	95.9999	160	141	134	100.102	0.11269	0.209786	0	1	1	100.102	0.393029	0.198257	0	1	1
ENSMUSG00000019102.10	183	146	157	159	69	70	47	54	82	94	93	135	19	16	32	18	88.2558	-1.52943	0.217416	-2.4351	0.0148877	0.5231	88.2558	-2.3735	0.254865	-5.38911	7.08056e-08	5.19167e-06
ENSMUSG00000019122.8	45.5151	44.8193	42.7758	23.5471	38.9853	27.9446	30.9005	37.6182	33.4768	31.8951	31.743	30.0277	36.5855	38.6348	19.1657	19.7939	33.5723	-0.27097	0.275427	0	1	1	33.5723	-0.272678	0.286154	0	1	1
ENSMUSG00000019124.10	1828.42	1860.16	2002.29	1728.21	2910.14	3069.78	2823.67	2721.81	755.046	776.073	797.375	769.225	2690.57	3589.86	3052.18	2897.52	2135.85	0.36681	0.0913773	0	1	1	2135.85	1.97424	0.0934408	10.4263	1.88045e-25	7.94188e-23
ENSMUSG00000019132.11	14748.8	15586.8	13821.9	12271.7	19722.7	20886	18578.3	18085.2	15469.4	18320.9	17234	16034	15849.6	19698.8	17350.5	16195	16795.7	0.348361	0.045977	0	1	1	16795.7	-0.140302	0.0459496	0	1	1
ENSMUSG00000019139.10	14657	16958	21318	19889	17990	16827	19565	18342	24270	25583	25454	24002	12618	15379	14481	12077	18846.1	-0.116642	0.108317	0	1	1	18846.1	-0.976752	0.108328	0	1	1
ENSMUSG00000019143.15	2668.19	2890.64	2646.96	2168.53	3257.79	3177.89	3122.72	2759.1	2306.72	2733.05	2461.19	2295.19	2384.12	3179.74	2686.81	2696.77	2709.07	0.119492	0.0926746	0	1	1	2709.07	0.166023	0.0928672	0	1	1
ENSMUSG00000019146.2	8.67659	13.4092	6.69571	5.8454	6.97687	4.24203	5.05461	3.17139	10.1576	8.07231	12.6563	4.2353	11.6426	13.5304	10.1715	8.8335	8.3045	-0.966456	0.53124	0	1	1	8.3045	0.23724	0.467583	0	1	1
ENSMUSG00000019158.9	2202	2482	2864	2493	2297	2096	2328	2177	2664	2843	2837	2516	1548.01	2042	1744	1676	2319.2	-0.294038	0.0817829	0	1	1	2319.2	-0.787903	0.082092	0	1	1
ENSMUSG00000019173.11	12839	14576	14089	13098	11167	10937	11328	10094	17161	19820	19385	17303	11231	15173	13106	11957	13997.2	-0.426476	0.0439645	0	1	1	13997.2	-0.652455	0.0437727	0	1	1
ENSMUSG00000019178.17	24	26.9999	18	22	30	28	24.0001	24	20	27	22	14	33	64	34.0001	37	28.1706	0.275711	0.302624	0	1	1	28.1706	1.18988	0.294921	0.643842	0.519678	1
ENSMUSG00000019179.10	42517	45786.9	42860	39657	30324.3	28768.6	29009	26596.2	41489	45118.9	43621	41308	22742.8	28545.2	26458.9	22402	35123.8	-0.675266	0.0392152	0	1	1	35123.8	-0.899006	0.0392502	0	1	1
ENSMUSG00000019188.16	3170	3335	3632.99	3336	3441	3466	3237	2953	1838	2057	2174	2155	1690	2258	1913	1850	2689.65	-0.217205	0.0689084	0	1	1	2689.65	-0.281189	0.0704338	0	1	1
ENSMUSG00000019189.13	9296	9670	8839	8125	9233	8901.01	10393	9051	9380	10686	9980	9409	4673	5699	5514	4714	8419.78	-0.0552825	0.0539537	0	1	1	8419.78	-1.08553	0.0543337	-1.57415	0.115452	1
ENSMUSG00000019194.15	301	331	323	284	241	223	240	294	205	221	193	173	185	275	173	201	242.893	-0.453338	0.121817	0	1	1	242.893	-0.0367335	0.127401	0	1	1
ENSMUSG00000019210.10	8138	9127	8822.26	7991.61	7449.54	7086.51	7276.23	6781.52	6136	6909	6749	6346.83	5338.87	7730.05	6637.27	6254.77	7188.75	-0.357774	0.0417655	0	1	1	7188.75	-0.155182	0.0420867	0	1	1
ENSMUSG00000019214.14	12165.5	13313.6	15233.7	13108.3	16454.6	16269.6	16804.8	15181.6	13461.7	16015.5	15533.7	13334.2	13555.4	17749.9	15904.8	14386.4	14854.7	0.156242	0.0630422	0	1	1	14854.7	-0.0225526	0.063035	0	1	1
ENSMUSG00000019230.14	11.1056	16.1656	31.4176	23.4867	18.5381	19.1096	25.2964	22.3099	1.00011	4.04351	8.02473	3.07441	10.0769	44.1117	10.0215	25.0038	16.616	0.194781	0.525485	0	1	1	16.616	2.29139	0.616945	2.09319	0.0363318	0.622238
ENSMUSG00000019232.14	9.22981	10.0286	13.8336	9.40124	10.99	11.9517	7.58674	12.4076	6.77777	15.8982	8.34774	7.05762	12.6949	15.8301	8.32574	5.26526	10.229	-0.0716148	0.447807	0	1	1	10.229	0.0619684	0.455924	0	1	1
[truncated: 21,908 more rows]

## Sheet: README
Supplemental Table S1 Raw counts of wild-type and Dgcr8 KO ESCs in normal and pausing conditions, and results from differential gene expression analysis
