# Supplementary material for: Combinatorial microRNA activity is essential for the transition of pluripotent cells from proliferation into dormancy
Source: HighWire-hosted journal article supplement (doi:10.1101/gr.278662.123), 2024-05-06
Supplement: Supplemental_Table_S6.xlsx [file Supplemental_Table_S6.xlsx]

## Sheet: MaxQuant_results
Protein IDs	Majority protein IDs	Peptide counts (all)	Peptide counts (razor+unique)	Peptide counts (unique)	Protein names	Gene names	Fasta headers	Number of proteins	Peptides	Razor + unique peptides	Unique peptides	Peptides E14_Pause1	Peptides E14_Pause2	Peptides E14_Pause3	Peptides E14_WT1	Peptides E14_WT2	Peptides E14_WT3	Razor + unique peptides E14_Pause1	Razor + unique peptides E14_Pause2	Razor + unique peptides E14_Pause3	Razor + unique peptides E14_WT1	Razor + unique peptides E14_WT2	Razor + unique peptides E14_WT3	Unique peptides E14_Pause1	Unique peptides E14_Pause2	Unique peptides E14_Pause3	Unique peptides E14_WT1	Unique peptides E14_WT2	Unique peptides E14_WT3	Sequence coverage [%]	Unique + razor sequence coverage [%]	Unique sequence coverage [%]	Mol. weight [kDa]	Sequence length	Sequence lengths	Fraction average	Fraction 1	Fraction 3	Fraction 4	Fraction 5	Fraction 6	Q-value	Score	Identification type E14_Pause1	Identification type E14_Pause2	Identification type E14_Pause3	Identification type E14_WT1	Identification type E14_WT2	Identification type E14_WT3
E9Q616;A0A494BBD5	E9Q616	164;6	164;6	164;6		Ahnak	tr|E9Q616|E9Q616_MOUSE AHNAK nucleoprotein (desmoyokin) OS=Mus musculus OX=10090 GN=Ahnak PE=1 SV=1	2	164	164	164	127	107	136	122	141	126	127	107	136	122	141	126	127	107	136	122	141	126	56.9	56.9	56.9	604.25	5656	5656;311	3.46	331	330	302	169	215	0	323.31	By MS/MS	By MS/MS	By MS/MS	By MS/MS	By MS/MS	By MS/MS
E9QA63;E9PVY8;B1ARU4;A0A571BGC6;A0A571BF93;A0A0A0MQA6;E9QNP1;F6SHS0;F6YKN8;A0A0A0MQH5;A0A5F8MP99;F6RL59;S4R2A8	E9QA63;E9PVY8;B1ARU4;A0A571BGC6;A0A571BF93;A0A0A0MQA6;E9QNP1	158;158;157;145;145;145;143;49;11;10;6;5;1	158;158;157;145;145;145;143;49;11;10;6;5;1	0;0;0;0;0;0;0;0;0;0;0;0;0		Macf1	tr|E9QA63|E9QA63_MOUSE Microtubule-actin cross-linking factor 1 OS=Mus musculus OX=10090 GN=Macf1 PE=1 SV=2;tr|E9PVY8|E9PVY8_MOUSE Microtubule-actin cross-linking factor 1 OS=Mus musculus OX=10090 GN=Macf1 PE=1 SV=2;tr|B1ARU4|B1ARU4_MOUSE Microtubule-actin	13	158	158	0	112	98	131	101	105	112	112	98	131	101	105	112	0	0	0	0	0	0	27.9	27.9	0	831.93	7351	7351;7355;7353;5309;5323;5328;5478;2030;544;369;326;349;262	3.74	240	167	285	192	206	0	323.31	By MS/MS	By MS/MS	By MS/MS	By MS/MS	By MS/MS	By MS/MS
Q9JHU4;F6ZX84	Q9JHU4	152;8	152;8	152;8	Cytoplasmic dynein 1 heavy chain 1	Dync1h1	sp|Q9JHU4|DYHC1_MOUSE Cytoplasmic dynein 1 heavy chain 1 OS=Mus musculus OX=10090 GN=Dync1h1 PE=1 SV=2	2	152	152	152	98	125	123	107	94	100	98	125	123	107	94	100	98	125	123	107	94	100	39.7	39.7	39.7	532.04	4644	4644;252	3.68	366	128	250	207	309	0	323.31	By MS/MS	By MS/MS	By MS/MS	By MS/MS	By MS/MS	By MS/MS
F7ACR9;A0A286YD76	F7ACR9	150;12	6;2	5;2		Macf1	tr|F7ACR9|F7ACR9_MOUSE Microtubule-actin cross-linking factor 1 (Fragment) OS=Mus musculus OX=10090 GN=Macf1 PE=1 SV=1	2	150	6	5	111	97	131	100	102	110	6	4	6	4	4	6	5	3	5	3	3	5	36.5	1.5	1.2	608.23	5333	5333;1358	4.26	7		16	25	5	0	90.126	By MS/MS	By MS/MS	By MS/MS	By MS/MS	By MS/MS	By MS/MS
Q8BTM8;B7FAU9;B7FAV1;F6XC15;J3JS91;F6Z2C0;A0A668KLG7;F7AVL7	Q8BTM8;B7FAU9;B7FAV1	123;123;119;25;13;9;3;1	123;123;119;25;13;9;3;1	116;116;112;19;12;9;3;1	Filamin-A	Flna	sp|Q8BTM8|FLNA_MOUSE Filamin-A OS=Mus musculus OX=10090 GN=Flna PE=1 SV=5;tr|B7FAU9|B7FAU9_MOUSE Filamin, alpha OS=Mus musculus OX=10090 GN=Flna PE=1 SV=1;tr|B7FAV1|B7FAV1_MOUSE Filamin, alpha (Fragment) OS=Mus musculus OX=10090 GN=Flna PE=1 SV=1	8	123	123	116	97	108	116	91	98	94	97	108	116	91	98	94	92	102	109	85	92	89	61.2	61.2	59	281.22	2647	2647;2639;2583;511;277;280;73;74	3.42	535	138	299	236	313	0	323.31	By MS/MS	By MS/MS	By MS/MS	By MS/MS	By MS/MS	By MS/MS
A2ANY6;J3QMC5	A2ANY6;J3QMC5	115;114	115;114	115;114		Mdn1	tr|A2ANY6|A2ANY6_MOUSE Midasin OS=Mus musculus OX=10090 GN=Mdn1 PE=1 SV=1;tr|J3QMC5|J3QMC5_MOUSE Midasin OS=Mus musculus OX=10090 GN=Mdn1 PE=1 SV=1	2	115	115	115	77	99	95	78	71	66	77	99	95	78	71	66	77	99	95	78	71	66	27.1	27.1	27.1	630.33	5589	5589;5582	3.69	272	78	163	115	253	0	323.31	By MS/MS	By MS/MS	By MS/MS	By MS/MS	By MS/MS	By MS/MS
E9Q447;A3KGU5;A3KGU4;A0A5F8MQC3;P08032	E9Q447;A3KGU5	115;115;8;3;1	1;1;0;0;0	1;1;0;0;0		Sptan1	tr|E9Q447|E9Q447_MOUSE Spectrin alpha chain, non-erythrocytic 1 OS=Mus musculus OX=10090 GN=Sptan1 PE=1 SV=1;tr|A3KGU5|A3KGU5_MOUSE Spectrin alpha chain, non-erythrocytic 1 OS=Mus musculus OX=10090 GN=Sptan1 PE=1 SV=1	5	115	1	1	85	80	97	87	95	83	1	0	1	1	0	1	1	0	1	1	0	1	54.8	0.7	0.7	285.34	2478	2478;2457;219;112;2415	2.8	2		3			0	4.1181	By MS/MS	By matching	By MS/MS	By MS/MS	By matching	By matching
A3KGU7;A3KGU9	A3KGU7;A3KGU9	115;115	1;1	0;0		Sptan1	tr|A3KGU7|A3KGU7_MOUSE Spectrin alpha chain, non-erythrocytic 1 OS=Mus musculus OX=10090 GN=Sptan1 PE=1 SV=1;tr|A3KGU9|A3KGU9_MOUSE Spectrin alpha chain, non-erythrocytic 1 OS=Mus musculus OX=10090 GN=Sptan1 PE=1 SV=2	2	115	1	0	85	81	97	87	96	83	1	0	0	0	1	1	0	0	0	0	0	0	54.7	0.8	0	285.15	2477	2477;2498	4			4			0.0013748	3.0907	By MS/MS	By matching	By matching	By matching	By matching	By MS/MS
P16546	P16546	115	115	1	Spectrin alpha chain, non-erythrocytic 1	Sptan1	sp|P16546|SPTN1_MOUSE Spectrin alpha chain, non-erythrocytic 1 OS=Mus musculus OX=10090 GN=Sptan1 PE=1 SV=4	1	115	115	1	85	82	98	88	96	83	85	82	98	88	96	83	1	1	1	1	1	1	54.8	54.8	0.7	284.59	2472	2472	3.53	364	123	226	204	237	0	323.31	By MS/MS	By MS/MS	By MS/MS	By MS/MS	By MS/MS	By MS/MS
Q80X90	Q80X90	104	98	95	Filamin-B	Flnb	sp|Q80X90|FLNB_MOUSE Filamin-B OS=Mus musculus OX=10090 GN=Flnb PE=1 SV=3	1	104	98	95	91	92	94	87	95	89	87	87	88	82	90	84	85	84	85	80	88	82	57.3	55.5	53.8	277.82	2602	2602	3.41	460	181	208	231	269	0	323.31	By MS/MS	By MS/MS	By MS/MS	By MS/MS	By MS/MS	By MS/MS
Q8VDD5;F2Z494;A0A2R8VKI5;A0A2R8W6V7	Q8VDD5	104;7;5;3	104;7;5;3	86;6;5;3	Myosin-9	Myh9	sp|Q8VDD5|MYH9_MOUSE Myosin-9 OS=Mus musculus OX=10090 GN=Myh9 PE=1 SV=4	4	104	104	86	79	81	93	79	79	71	79	81	93	79	79	71	67	67	77	64	67	60	54.6	54.6	46.4	226.37	1960	1960;120;211;110	3.61	361	78	264	349	168	0	323.31	By MS/MS	By MS/MS	By MS/MS	By MS/MS	By MS/MS	By MS/MS
E9PVX6;A0A1B0GQV9	E9PVX6	102;5	102;5	102;5		Mki67	sp|E9PVX6|KI67_MOUSE Proliferation marker protein Ki-67 OS=Mus musculus OX=10090 GN=Mki67 PE=1 SV=1	2	102	102	102	86	79	90	74	82	87	86	79	90	74	82	87	86	79	90	74	82	87	41.8	41.8	41.8	350.86	3177	3177;192	3.48	233	167	235	209	85	0	323.31	By MS/MS	By MS/MS	By MS/MS	By MS/MS	By MS/MS	By MS/MS
Q9ERU9	Q9ERU9	99	99	99	E3 SUMO-protein ligase RanBP2	Ranbp2	sp|Q9ERU9|RBP2_MOUSE E3 SUMO-protein ligase RanBP2 OS=Mus musculus OX=10090 GN=Ranbp2 PE=1 SV=2	1	99	99	99	84	68	77	74	83	81	84	68	77	74	83	81	84	68	77	74	83	81	39.2	39.2	39.2	341.12	3053	3053	3.46	331	106	191	177	191	0	323.31	By MS/MS	By MS/MS	By MS/MS	By MS/MS	By MS/MS	By MS/MS
S4R1P5;E9Q9X1;Q91ZU6;A0A087WSP0;A0A087WPR7;S4R1Y6;A0A087WRB8;A0A0A6YX28;A0A0A6YXR1;A0A571BGG5;A0A5F8MPU9;S4R2C6	S4R1P5;E9Q9X1;Q91ZU6;A0A087WSP0	96;94;93;72;27;21;20;4;4;3;2;2	92;90;89;69;27;18;19;3;3;3;1;1	73;72;71;50;27;6;19;3;3;3;1;1	Dystonin	Dst	tr|S4R1P5|S4R1P5_MOUSE Dystonin OS=Mus musculus OX=10090 GN=Dst PE=1 SV=1;tr|E9Q9X1|E9Q9X1_MOUSE Dystonin OS=Mus musculus OX=10090 GN=Dst PE=1 SV=2;sp|Q91ZU6|DYST_MOUSE Dystonin OS=Mus musculus OX=10090 GN=Dst PE=1 SV=2;tr|A0A087WSP0|A0A087WSP0_MOUSE Dysto	12	96	92	73	56	32	61	53	63	71	54	31	58	51	61	69	43	26	50	41	50	55	16.6	16	13.3	870.52	7717	7717;7406;7393;5175;2987;1638;1471;274;282;386;153;259	4.13	34	99	87	82	85	0	301.31	By MS/MS	By MS/MS	By MS/MS	By MS/MS	By MS/MS	By MS/MS
Q99PV0;B7ZC27	Q99PV0	87;31	87;31	87;31	Pre-mRNA-processing-splicing factor 8	Prpf8	sp|Q99PV0|PRP8_MOUSE Pre-mRNA-processing-splicing factor 8 OS=Mus musculus OX=10090 GN=Prpf8 PE=1 SV=2	2	87	87	87	64	75	76	68	63	61	64	75	76	68	63	61	64	75	76	68	63	61	44.9	44.9	44.9	273.61	2335	2335;1044	3.65	342	65	130	176	285	0	323.31	By MS/MS	By MS/MS	By MS/MS	By MS/MS	By MS/MS	By MS/MS
Q62261;A0A0A0MQG2;P15508;Q3UGX2;A0A494BBH5;E9Q397	Q62261;A0A0A0MQG2	83;70;2;2;2;2	83;70;2;2;2;2	77;64;0;0;0;0	Spectrin beta chain, non-erythrocytic 1	Sptbn1	sp|Q62261|SPTB2_MOUSE Spectrin beta chain, non-erythrocytic 1 OS=Mus musculus OX=10090 GN=Sptbn1 PE=1 SV=2;tr|A0A0A0MQG2|A0A0A0MQG2_MOUSE Spectrin beta chain, non-erythrocytic 1 (Fragment) OS=Mus musculus OX=10090 GN=Sptbn1 PE=1 SV=1	6	83	83	77	67	61	72	64	74	70	67	61	72	64	74	70	63	56	69	61	70	66	43	43	40.3	274.22	2363	2363;2092;2128;2329;175;2137	3.43	263	128	261	157	117	0	323.31	By MS/MS	By MS/MS	By MS/MS	By MS/MS	By MS/MS	By MS/MS
Q6P4T2	Q6P4T2	82	82	82	U5 small nuclear ribonucleoprotein 200 kDa helicase	Snrnp200	sp|Q6P4T2|U520_MOUSE U5 small nuclear ribonucleoprotein 200 kDa helicase OS=Mus musculus OX=10090 GN=Snrnp200 PE=1 SV=1	1	82	82	82	53	73	68	56	45	45	53	73	68	56	45	45	53	73	68	56	45	45	43.4	43.4	43.4	244.54	2136	2136	3.55	244	86	106	155	162	0	323.31	By MS/MS	By MS/MS	By MS/MS	By MS/MS	By MS/MS	By MS/MS
P26039;A2AIM2;F6S1V7;F6SX70	P26039	80;11;3;3	80;11;3;3	73;10;3;3	Talin-1	Tln1	sp|P26039|TLN1_MOUSE Talin-1 OS=Mus musculus OX=10090 GN=Tln1 PE=1 SV=2	4	80	80	73	69	58	71	69	69	68	69	58	71	69	69	68	62	52	65	63	63	61	45.5	45.5	41.5	269.82	2541	2541;241;122;279	3.48	317	88	213	209	157	0	323.31	By MS/MS	By MS/MS	By MS/MS	By MS/MS	By MS/MS	By MS/MS
A2ASS6;A0A5K1VVQ1;E9Q8N1;E9Q8K5;A0A5K1VVQ9;A2AT64;A2AT67;A2AT66;A2AT65;A2AT68;A2AT70;F7CR78	A2ASS6;A0A5K1VVQ1;E9Q8N1;E9Q8K5;A0A5K1VVQ9	80;80;80;80;80;1;1;1;1;1;1;1	80;80;80;80;80;1;1;1;1;1;1;1	80;80;80;80;80;1;1;1;1;1;1;1	Titin	Ttn	sp|A2ASS6|TITIN_MOUSE Titin OS=Mus musculus OX=10090 GN=Ttn PE=1 SV=1;tr|A0A5K1VVQ1|A0A5K1VVQ1_MOUSE Titin OS=Mus musculus OX=10090 GN=Ttn PE=1 SV=1;tr|E9Q8N1|E9Q8N1_MOUSE Titin OS=Mus musculus OX=10090 GN=Ttn PE=1 SV=1;tr|E9Q8K5|E9Q8K5_MOUSE Titin OS=Mus	12	80	80	80	41	20	46	24	38	21	41	20	46	24	38	21	41	20	46	24	38	21	3.2	3.2	3.2	3906.4	35213	35213;26938;33467;33467;35390;544;629;679;710;1054;3409;8272	4.47	4	48	39	59	47	0	151.15	By MS/MS	By MS/MS	By MS/MS	By MS/MS	By MS/MS	By MS/MS
Q61879;Q3UH59;Q5SV64;Q8BXF2;Q5SX39;Q5SX40;Q91Z83;G3UW82;P13541	Q61879;Q3UH59;Q5SV64	79;79;77;6;1;1;1;1;1	66;66;64;4;0;0;0;0;0	65;65;63;4;0;0;0;0;0	Myosin-10	Myh10	sp|Q61879|MYH10_MOUSE Myosin-10 OS=Mus musculus OX=10090 GN=Myh10 PE=1 SV=2;tr|Q3UH59|Q3UH59_MOUSE Myosin-10 OS=Mus musculus OX=10090 GN=Myh10 PE=1 SV=1;tr|Q5SV64|Q5SV64_MOUSE Myosin-10 OS=Mus musculus OX=10090 GN=Myh10 PE=1 SV=1	9	79	66	65	57	56	64	59	59	49	48	46	53	47	50	40	47	45	52	46	49	39	43.8	37.1	37.1	228.99	1976	1976;2013;2007;231;1939;1942;1935;1942;1940	3.58	109	52	137	104	44	0	323.31	By MS/MS	By MS/MS	By MS/MS	By MS/MS	By MS/MS	By MS/MS
P19096;A0A0U1RNJ1;A0A0U1RPP5	P19096;A0A0U1RNJ1	77;76;1	77;76;1	77;76;1	Fatty acid synthase;[Acyl-carrier-protein] S-acetyltransferase;[Acyl-carrier-protein] S-malonyltransferase;3-oxoacyl-[acyl-carrier-protein] synthase;3-oxoacyl-[acyl-carrier-protein] reductase;3-hydroxyacyl-[acyl-carrier-protein] dehydratase;Enoyl-[acyl-carrier-protein] reductase;Oleoyl-[acyl-carrier-protein] hydrolase	Fasn	sp|P19096|FAS_MOUSE Fatty acid synthase OS=Mus musculus OX=10090 GN=Fasn PE=1 SV=2;tr|A0A0U1RNJ1|A0A0U1RNJ1_MOUSE 3-hydroxyacyl-[acyl-carrier-protein] dehydratase OS=Mus musculus OX=10090 GN=Fasn PE=1 SV=1	3	77	77	77	47	60	56	69	63	59	47	60	56	69	63	59	47	60	56	69	63	59	43.7	43.7	43.7	272.43	2504	2504;2502;24	3.71	286	66	88	169	251	0	323.31	By MS/MS	By MS/MS	By MS/MS	By MS/MS	By MS/MS	By MS/MS
Q01320	Q01320	77	77	62	DNA topoisomerase 2-alpha	Top2a	sp|Q01320|TOP2A_MOUSE DNA topoisomerase 2-alpha OS=Mus musculus OX=10090 GN=Top2a PE=1 SV=2	1	77	77	62	63	69	69	63	70	63	63	69	69	63	70	63	49	56	56	51	56	49	51.2	51.2	43.1	172.79	1528	1528	3.4	373	167	224	171	215	0	323.31	By MS/MS	By MS/MS	By MS/MS	By MS/MS	By MS/MS	By MS/MS
Q9QXS1;E9Q3W4;A0A3B2W7J8;A0A0R4J223;A0A0R4J221;A0A0R4J218;E9Q9J6;E9PW24	Q9QXS1;E9Q3W4	76;74;26;8;8;8;7;6	75;73;26;8;8;8;7;6	74;72;25;8;8;8;7;6	Plectin	Plec	sp|Q9QXS1|PLEC_MOUSE Plectin OS=Mus musculus OX=10090 GN=Plec PE=1 SV=3;tr|E9Q3W4|E9Q3W4_MOUSE Plectin OS=Mus musculus OX=10090 GN=Plec PE=1 SV=1	8	76	75	74	45	41	45	54	54	55	44	40	44	53	53	54	43	39	43	52	52	53	22.3	22.1	21.3	534.18	4691	4691;4386;1646;661;702;964;676;499	4.39	41	49	58	141	90	0	241.91	By MS/MS	By MS/MS	By MS/MS	By MS/MS	By MS/MS	By MS/MS
E9PVA8	E9PVA8	75	75	75		Gcn1l1	sp|E9PVA8|GCN1_MOUSE eIF-2-alpha kinase activator GCN1 OS=Mus musculus OX=10090 GN=Gcn1 PE=1 SV=1	1	75	75	75	59	61	57	60	54	54	59	61	57	60	54	54	59	61	57	60	54	54	35.8	35.8	35.8	293.02	2671	2671	3.75	191	41	131	161	144	0	323.31	By MS/MS	By MS/MS	By MS/MS	By MS/MS	By MS/MS	By MS/MS
Q7M739	Q7M739	75	75	2		Tpr	tr|Q7M739|Q7M739_MOUSE Nucleoprotein TPR OS=Mus musculus OX=10090 GN=Tpr PE=1 SV=1	1	75	75	2	64	64	67	60	65	64	64	64	67	60	65	64	2	1	2	2	2	2	37.4	37.4	0.8	266.92	2357	2357	3.43	312	92	211	252	108	0	323.31	By MS/MS	By MS/MS	By MS/MS	By MS/MS	By MS/MS	By MS/MS
Q7TMY8;A2AFQ0;F6XP90;A0A668KL97;F6UYC1	Q7TMY8;A2AFQ0	74;74;25;5;2	74;74;25;5;2	74;74;25;5;2	E3 ubiquitin-protein ligase HUWE1	Huwe1	sp|Q7TMY8|HUWE1_MOUSE E3 ubiquitin-protein ligase HUWE1 OS=Mus musculus OX=10090 GN=Huwe1 PE=1 SV=5;tr|A2AFQ0|A2AFQ0_MOUSE HECT-type E3 ubiquitin transferase OS=Mus musculus OX=10090 GN=Huwe1 PE=1 SV=1	5	74	74	74	56	52	59	41	41	40	56	52	59	41	41	40	56	52	59	41	41	40	21.9	21.9	21.9	482.63	4377	4377;4378;1176;226;150	3.84	166	36	94	98	172	0	323.31	By MS/MS	By MS/MS	By MS/MS	By MS/MS	By MS/MS	By MS/MS
Q6PR54;A0A2I3BQI4;A0A2I3BRD9;A0A2I3BQ21	Q6PR54	74;27;24;20	74;27;24;20	74;27;24;20	Telomere-associated protein RIF1	Rif1	sp|Q6PR54|RIF1_MOUSE Telomere-associated protein RIF1 OS=Mus musculus OX=10090 GN=Rif1 PE=1 SV=2	4	74	74	74	59	65	63	58	57	58	59	65	63	58	57	58	59	65	63	58	57	58	35.5	35.5	35.5	266.23	2419	2419;740;731;535	3.38	240	116	150	86	146	0	323.31	By MS/MS	By MS/MS	By MS/MS	By MS/MS	By MS/MS	By MS/MS
F6ZDS4;F6RX08	F6ZDS4	74;6	1;0	1;0	Nucleoprotein TPR	Tpr	sp|F6ZDS4|TPR_MOUSE Nucleoprotein TPR OS=Mus musculus OX=10090 GN=Tpr PE=1 SV=1	2	74	1	1	63	64	66	59	64	63	1	1	1	1	1	1	1	1	1	1	1	1	36.4	0.9	0.9	273.99	2431	2431;611	5				6		0	6.604	By matching	By MS/MS	By MS/MS	By MS/MS	By MS/MS	By MS/MS
E9Q7G0;A0A1B0GSW3;A0A1B0GT61;F6ZQA3;A0A1B0GSH2;A0A1B0GT38	E9Q7G0;A0A1B0GSW3	72;37;29;24;6;5	72;37;29;24;6;5	72;37;29;24;6;5		Numa1	sp|E9Q7G0|NUMA1_MOUSE Nuclear mitotic apparatus protein 1 OS=Mus musculus OX=10090 GN=Numa1 PE=1 SV=1;tr|A0A1B0GSW3|A0A1B0GSW3_MOUSE Nuclear mitotic apparatus protein 1 (Fragment) OS=Mus musculus OX=10090 GN=Numa1 PE=1 SV=1	6	72	72	72	60	55	69	58	56	55	60	55	69	58	56	55	60	55	69	58	56	55	46.8	46.8	46.8	235.63	2094	2094;1082;875;741;218;207	3.39	230	90	168	138	99	0	323.31	By MS/MS	By MS/MS	By MS/MS	By MS/MS	By MS/MS	By MS/MS
Q5XG71;E9QK83;A0A1W2P8D7;A0A1W2P6J9;A0A1W2P7L8	Q5XG71;E9QK83	67;67;4;2;2	67;67;4;2;2	67;67;4;2;2	Small subunit processome component 20 homolog	Utp20	sp|Q5XG71|UTP20_MOUSE Small subunit processome component 20 homolog OS=Mus musculus OX=10090 GN=Utp20 PE=1 SV=2;tr|E9QK83|E9QK83_MOUSE Small subunit processome component 20 homolog OS=Mus musculus OX=10090 GN=Utp20 PE=1 SV=1	5	67	67	67	48	50	52	46	55	45	48	50	52	46	55	45	48	50	52	46	55	45	30.4	30.4	30.4	317.74	2788	2788;2789;141;162;201	3.74	162	55	80	79	161	0	323.31	By MS/MS	By MS/MS	By MS/MS	By MS/MS	By MS/MS	By MS/MS
Q9WTQ5;A0A668KLV9;A0A668KLD3;A0A668KM55	Q9WTQ5;A0A668KLV9;A0A668KLD3	66;64;64;7	66;64;64;7	66;64;64;7	A-kinase anchor protein 12	Akap12	sp|Q9WTQ5|AKA12_MOUSE A-kinase anchor protein 12 OS=Mus musculus OX=10090 GN=Akap12 PE=1 SV=1;tr|A0A668KLV9|A0A668KLV9_MOUSE A-kinase anchor protein 12 OS=Mus musculus OX=10090 GN=Akap12 PE=1 SV=1;tr|A0A668KLD3|A0A668KLD3_MOUSE A-kinase anchor protein 12 O	4	66	66	66	55	53	58	55	61	58	55	53	58	55	61	58	55	53	58	55	61	58	58.6	58.6	58.6	180.69	1684	1684;1604;1604;190	2.88	336	279	196	79	68	0	323.31	By MS/MS	By MS/MS	By MS/MS	By MS/MS	By MS/MS	By MS/MS
P58252	P58252	66	66	65	Elongation factor 2	Eef2	sp|P58252|EF2_MOUSE Elongation factor 2 OS=Mus musculus OX=10090 GN=Eef2 PE=1 SV=2	1	66	66	65	50	57	53	62	59	61	50	57	53	62	59	61	49	56	53	61	59	60	73.5	73.5	72.4	95.313	858	858	3.54	537	147	245	283	373	0	323.31	By MS/MS	By MS/MS	By MS/MS	By MS/MS	By MS/MS	By MS/MS
Q8CGC7;A0A0A6YWA4;A0A0A6YWH3	Q8CGC7	66;2;1	66;2;1	66;2;1	Bifunctional glutamate/proline--tRNA ligase;Glutamate--tRNA ligase;Proline--tRNA ligase	Eprs	sp|Q8CGC7|SYEP_MOUSE Bifunctional glutamate/proline--tRNA ligase OS=Mus musculus OX=10090 GN=Eprs1 PE=1 SV=4	3	66	66	66	57	59	57	56	63	61	57	59	57	56	63	61	57	59	57	56	63	61	48.9	48.9	48.9	170.08	1512	1512;131;96	3.48	367	92	181	189	228	0	323.31	By MS/MS	By MS/MS	By MS/MS	By MS/MS	By MS/MS	By MS/MS
A2AN08;Z4YMA7;F6SSP6;Z4YLP1	A2AN08	65;21;21;2	65;21;21;2	65;21;21;2	E3 ubiquitin-protein ligase UBR4	Ubr4	sp|A2AN08|UBR4_MOUSE E3 ubiquitin-protein ligase UBR4 OS=Mus musculus OX=10090 GN=Ubr4 PE=1 SV=1	4	65	65	65	46	41	51	48	48	46	46	41	51	48	48	46	46	41	51	48	48	46	17.1	17.1	17.1	572.28	5180	5180;1301;2065;204	3.94	94	40	87	114	91	0	256.58	By MS/MS	By MS/MS	By MS/MS	By MS/MS	By MS/MS	By MS/MS
P57780;A0A1L1SV25;A0A1L1SVJ6;D3Z0L8;D3Z761	P57780;A0A1L1SV25	63;62;21;12;9	63;62;21;12;9	22;21;16;1;0	Alpha-actinin-4	Actn4	sp|P57780|ACTN4_MOUSE Alpha-actinin-4 OS=Mus musculus OX=10090 GN=Actn4 PE=1 SV=1;tr|A0A1L1SV25|A0A1L1SV25_MOUSE Alpha-actinin-4 OS=Mus musculus OX=10090 GN=Actn4 PE=1 SV=1	5	63	63	22	45	58	56	55	51	46	45	58	56	55	51	46	18	21	20	19	21	18	69.6	69.6	28.4	104.98	912	912;932;323;206;133	3.44	427	98	218	210	246	0	323.31	By MS/MS	By MS/MS	By MS/MS	By MS/MS	By MS/MS	By MS/MS
Q6PDQ2;E9QAS5;E9QAS4;F6WR45;A2A8L1;E9PYU4;E9PYL1;B1AR17;F7C528;E9Q614;A0A5F8MQ82;F6V4V3	Q6PDQ2;E9QAS5;E9QAS4	63;63;63;16;14;14;14;10;10;10;2;1	63;63;63;16;14;14;14;10;10;10;2;1	63;63;63;16;14;14;14;10;10;10;2;1	Chromodomain-helicase-DNA-binding protein 4	Chd4	sp|Q6PDQ2|CHD4_MOUSE Chromodomain-helicase-DNA-binding protein 4 OS=Mus musculus OX=10090 GN=Chd4 PE=1 SV=1;tr|E9QAS5|E9QAS5_MOUSE DNA helicase OS=Mus musculus OX=10090 GN=Chd4 PE=1 SV=1;tr|E9QAS4|E9QAS4_MOUSE DNA helicase OS=Mus musculus OX=10090 GN=Chd4	12	63	63	63	54	55	57	56	55	52	54	55	57	56	55	52	54	55	57	56	55	52	40.1	40.1	40.1	217.75	1915	1915;1922;1902;444;1946;1915;1952;2055;1886;2021;385;197	3.62	270	95	93	169	210	0	323.31	By MS/MS	By MS/MS	By MS/MS	By MS/MS	By MS/MS	By MS/MS
Z4YL78;A0A0R4J0K2;K3W4R5;A2AGT5	Z4YL78;A0A0R4J0K2;K3W4R5;A2AGT5	63;63;63;62	63;63;63;62	63;63;63;62	Cytoskeleton-associated protein 5	Ckap5	tr|Z4YL78|Z4YL78_MOUSE Cytoskeleton-associated protein 5 OS=Mus musculus OX=10090 GN=Ckap5 PE=1 SV=1;tr|A0A0R4J0K2|A0A0R4J0K2_MOUSE Cytoskeleton-associated protein 5 OS=Mus musculus OX=10090 GN=Ckap5 PE=1 SV=1;tr|K3W4R5|K3W4R5_MOUSE Cytoskeleton-associated	4	63	63	63	53	48	57	51	52	52	53	48	57	51	52	52	53	48	57	51	52	52	35.9	35.9	35.9	218.71	1972	1972;2011;2032;2032	3.78	157	66	88	95	160	0	285.7	By MS/MS	By MS/MS	By MS/MS	By MS/MS	By MS/MS	By MS/MS
P11499;E9Q3D6;E9Q0C3;E9PX27;D3Z1R1	P11499	62;17;12;5;4	62;17;12;5;4	48;13;12;1;0	Heat shock protein HSP 90-beta	Hsp90ab1	sp|P11499|HS90B_MOUSE Heat shock protein HSP 90-beta OS=Mus musculus OX=10090 GN=Hsp90ab1 PE=1 SV=3	5	62	62	48	50	52	56	59	55	51	50	52	56	59	55	51	37	39	42	46	41	38	70.3	70.3	53.9	83.28	724	724;189;161;112;76	3.77	732	256	297	563	655	0	323.31	By MS/MS	By MS/MS	By MS/MS	By MS/MS	By MS/MS	By MS/MS
Q3U2G2;Q61316	Q3U2G2;Q61316	62;61	62;61	59;58	Heat shock 70 kDa protein 4	Hspa4	tr|Q3U2G2|Q3U2G2_MOUSE Heat shock 70 kDa protein 4 OS=Mus musculus OX=10090 GN=Hspa4 PE=1 SV=1;sp|Q61316|HSP74_MOUSE Heat shock 70 kDa protein 4 OS=Mus musculus OX=10090 GN=Hspa4 PE=1 SV=1	2	62	62	59	55	54	54	54	53	57	55	54	54	54	53	57	52	51	51	51	50	54	77.9	77.9	76.8	94.208	842	842;841	3.43	448	211	238	301	223	0	323.31	By MS/MS	By MS/MS	By MS/MS	By MS/MS	By MS/MS	By MS/MS
B7ZWL1;A0A1D5RMJ8;A0A1D5RM04;A0A1D5RM03;A0A1D5RMB6	B7ZWL1;A0A1D5RMJ8	60;60;4;4;3	1;1;0;0;0	1;1;0;0;0		Cnot1	tr|B7ZWL1|B7ZWL1_MOUSE CCR4-NOT transcription complex subunit 1 OS=Mus musculus OX=10090 GN=Cnot1 PE=1 SV=1;tr|A0A1D5RMJ8|A0A1D5RMJ8_MOUSE CCR4-NOT transcription complex subunit 1 OS=Mus musculus OX=10090 GN=Cnot1 PE=1 SV=1	5	60	1	1	41	48	52	43	40	36	1	0	1	0	1	1	1	0	1	0	1	1	31.2	1.2	1.2	260.95	2326	2326;2369;122;213;92	2.67	4				2	0	21.007	By MS/MS	By matching	By MS/MS	By matching	By MS/MS	By MS/MS
Q6ZQ08;A0A1D5RMD8;A0A1D5RML9	Q6ZQ08;A0A1D5RMD8	60;47;21	60;47;21	1;1;1	CCR4-NOT transcription complex subunit 1	Cnot1	sp|Q6ZQ08|CNOT1_MOUSE CCR4-NOT transcription complex subunit 1 OS=Mus musculus OX=10090 GN=Cnot1 PE=1 SV=2;tr|A0A1D5RMD8|A0A1D5RMD8_MOUSE CCR4-NOT transcription complex subunit 1 OS=Mus musculus OX=10090 GN=Cnot1 PE=1 SV=1	3	60	60	1	41	49	52	44	40	36	41	49	52	44	40	36	1	1	1	1	1	1	30	30	0.6	266.8	2375	2375;1614;823	3.78	157	41	89	99	148	0	323.31	By MS/MS	By MS/MS	By MS/MS	By MS/MS	By MS/MS	By MS/MS
Q7TPV4	Q7TPV4	60	60	60	Myb-binding protein 1A	Mybbp1a	sp|Q7TPV4|MBB1A_MOUSE Myb-binding protein 1A OS=Mus musculus OX=10090 GN=Mybbp1a PE=1 SV=2	1	60	60	60	42	56	51	51	46	43	42	56	51	51	46	43	42	56	51	51	46	43	48.4	48.4	48.4	152.04	1344	1344	3.27	311	97	113	108	169	0	323.31	By MS/MS	By MS/MS	By MS/MS	By MS/MS	By MS/MS	By MS/MS
Q68FD5;Q5SXR6;F6Z1R4	Q68FD5;Q5SXR6	59;59;6	59;59;6	59;59;6	Clathrin heavy chain 1;Clathrin heavy chain	Cltc	sp|Q68FD5|CLH1_MOUSE Clathrin heavy chain 1 OS=Mus musculus OX=10090 GN=Cltc PE=1 SV=3;tr|Q5SXR6|Q5SXR6_MOUSE Clathrin heavy chain OS=Mus musculus OX=10090 GN=Cltc PE=1 SV=1	3	59	59	59	38	55	52	50	38	31	38	55	52	50	38	31	38	55	52	50	38	31	46.2	46.2	46.2	191.55	1675	1675;1679;216	3.32	229	38	64	78	137	0	323.31	By MS/MS	By MS/MS	By MS/MS	By MS/MS	By MS/MS	By MS/MS
Q8BU30;F6Q6R1;E9Q866	Q8BU30	59;5;4	59;5;4	59;5;4	Isoleucine--tRNA ligase, cytoplasmic	Iars	sp|Q8BU30|SYIC_MOUSE Isoleucine--tRNA ligase, cytoplasmic OS=Mus musculus OX=10090 GN=Iars1 PE=1 SV=2	3	59	59	59	43	46	48	45	47	47	43	46	48	45	47	47	43	46	48	45	47	47	53.2	53.2	53.2	144.27	1262	1262;96;92	3.69	212	51	70	91	201	0	323.31	By MS/MS	By MS/MS	By MS/MS	By MS/MS	By MS/MS	By MS/MS
P54276;A0A3Q4EGF1	P54276	59;4	59;4	59;4	DNA mismatch repair protein Msh6	Msh6	sp|P54276|MSH6_MOUSE DNA mismatch repair protein Msh6 OS=Mus musculus OX=10090 GN=Msh6 PE=1 SV=3	2	59	59	59	46	52	53	51	47	48	46	52	53	51	47	48	46	52	53	51	47	48	49.4	49.4	49.4	151.08	1358	1358;167	3.56	286	70	96	172	196	0	323.31	By MS/MS	By MS/MS	By MS/MS	By MS/MS	By MS/MS	By MS/MS
Q6NS46	Q6NS46	59	59	59	Protein RRP5 homolog	Pdcd11	sp|Q6NS46|RRP5_MOUSE Protein RRP5 homolog OS=Mus musculus OX=10090 GN=Pdcd11 PE=1 SV=2	1	59	59	59	42	48	52	49	44	46	42	48	52	49	44	46	42	48	52	49	44	46	35.4	35.4	35.4	207.78	1862	1862	3.67	240	35	77	86	226	0	323.31	By MS/MS	By MS/MS	By MS/MS	By MS/MS	By MS/MS	By MS/MS
P70398;Q4FE56;E9PWA9;G3UZS3	P70398;Q4FE56	59;59;18;5	59;59;18;5	47;47;12;5	Probable ubiquitin carboxyl-terminal hydrolase FAF-X;Ubiquitin carboxyl-terminal hydrolase	Usp9x	sp|P70398|USP9X_MOUSE Probable ubiquitin carboxyl-terminal hydrolase FAF-X OS=Mus musculus OX=10090 GN=Usp9x PE=1 SV=2;tr|Q4FE56|Q4FE56_MOUSE Probable ubiquitin carboxyl-terminal hydrolase FAF-X OS=Mus musculus OX=10090 GN=Usp9x PE=1 SV=1	4	59	59	47	44	50	52	46	40	37	44	50	52	46	40	37	33	41	40	34	30	27	27.9	27.9	22.7	290.71	2559	2559;2554;755;345	3.53	150	76	77	67	116	0	321.83	By MS/MS	By MS/MS	By MS/MS	By MS/MS	By MS/MS	By MS/MS
E9Q3P4;E9PY14;E9Q776;F6V6F0	E9Q3P4	57;22;3;1	57;22;3;1	57;22;3;1		Cenpf	tr|E9Q3P4|E9Q3P4_MOUSE Centromere protein F OS=Mus musculus OX=10090 GN=Cenpf PE=1 SV=1	4	57	57	57	40	28	37	28	38	36	40	28	37	28	38	36	40	28	37	28	38	36	24.5	24.5	24.5	342.47	2997	2997;952;88;119	4.02	22	58	75	61	34	0	165.49	By MS/MS	By MS/MS	By MS/MS	By MS/MS	By MS/MS	By MS/MS
P07901;B7ZC50;B7ZC49;A2A6A2	P07901	57;9;6;5	45;4;4;3	45;4;4;3	Heat shock protein HSP 90-alpha	Hsp90aa1	sp|P07901|HS90A_MOUSE Heat shock protein HSP 90-alpha OS=Mus musculus OX=10090 GN=Hsp90aa1 PE=1 SV=4	4	57	45	45	51	54	52	54	51	48	40	43	40	43	39	37	40	43	40	43	39	37	70.8	56.9	56.9	84.787	733	733;201;103;98	3.61	514	388	286	401	382	0	323.31	By MS/MS	By MS/MS	By MS/MS	By MS/MS	By MS/MS	By MS/MS
P14733	P14733	57	57	54	Lamin-B1	Lmnb1	sp|P14733|LMNB1_MOUSE Lamin-B1 OS=Mus musculus OX=10090 GN=Lmnb1 PE=1 SV=3	1	57	57	54	43	52	53	48	47	47	43	52	53	48	47	47	41	49	50	46	44	44	78.9	78.9	75.2	66.785	588	588	3.44	375	130	201	247	186	0	323.31	By MS/MS	By MS/MS	By MS/MS	By MS/MS	By MS/MS	By MS/MS
Q6PB66;F6V2A3	Q6PB66	57;3	57;3	57;3	Leucine-rich PPR motif-containing protein, mitochondrial	Lrpprc	sp|Q6PB66|LPPRC_MOUSE Leucine-rich PPR motif-containing protein, mitochondrial OS=Mus musculus OX=10090 GN=Lrpprc PE=1 SV=2	2	57	57	57	45	50	51	51	47	46	45	50	51	51	47	46	45	50	51	51	47	46	51	51	51	156.61	1392	1392;142	3.6	247	52	127	138	179	0	323.31	By MS/MS	By MS/MS	By MS/MS	By MS/MS	By MS/MS	By MS/MS
Q6ZQ38;D3YWC5	Q6ZQ38	56;9	56;9	55;9	Cullin-associated NEDD8-dissociated protein 1	Cand1	sp|Q6ZQ38|CAND1_MOUSE Cullin-associated NEDD8-dissociated protein 1 OS=Mus musculus OX=10090 GN=Cand1 PE=1 SV=2	2	56	56	55	40	46	46	45	43	42	40	46	46	45	43	42	39	46	46	45	42	42	48.9	48.9	48.9	136.33	1230	1230;247	3.78	219	32	125	147	191	0	323.31	By MS/MS	By MS/MS	By MS/MS	By MS/MS	By MS/MS	By MS/MS
Q9JKF1;A0A0U1RNG5;A0A0U1RPI2;A0A0U1RPU3	Q9JKF1	56;5;1;1	56;5;1;1	53;5;1;1	Ras GTPase-activating-like protein IQGAP1	Iqgap1	sp|Q9JKF1|IQGA1_MOUSE Ras GTPase-activating-like protein IQGAP1 OS=Mus musculus OX=10090 GN=Iqgap1 PE=1 SV=2	4	56	56	53	43	40	47	46	44	48	43	40	47	46	44	48	41	38	45	44	42	45	44.9	44.9	43.2	188.74	1657	1657;186;37;101	3.73	170	65	87	92	163	0	323.31	By MS/MS	By MS/MS	By MS/MS	By MS/MS	By MS/MS	By MS/MS
P23116;A0A494B9I0	P23116	55;3	55;3	55;3	Eukaryotic translation initiation factor 3 subunit A	Eif3a	sp|P23116|EIF3A_MOUSE Eukaryotic translation initiation factor 3 subunit A OS=Mus musculus OX=10090 GN=Eif3a PE=1 SV=5	2	55	55	55	39	48	44	48	45	47	39	48	44	48	45	47	39	48	44	48	45	47	40	40	40	161.93	1344	1344;194	3.62	251	19	85	105	206	0	323.31	By MS/MS	By MS/MS	By MS/MS	By MS/MS	By MS/MS	By MS/MS
P08775;A0A0R4J0V5	P08775;A0A0R4J0V5	55;55	55;55	55;55	DNA-directed RNA polymerase II subunit RPB1	Polr2a	sp|P08775|RPB1_MOUSE DNA-directed RNA polymerase II subunit RPB1 OS=Mus musculus OX=10090 GN=Polr2a PE=1 SV=3;tr|A0A0R4J0V5|A0A0R4J0V5_MOUSE DNA-directed RNA polymerase subunit OS=Mus musculus OX=10090 GN=Polr2a PE=1 SV=1	2	55	55	55	44	44	47	33	42	36	44	44	47	33	42	36	44	44	47	33	42	36	37.7	37.7	37.7	217.17	1970	1970;1932	3.37	129	75	94	53	72	0	323.31	By MS/MS	By MS/MS	By MS/MS	By MS/MS	By MS/MS	By MS/MS
Q9CU62;S4R179	Q9CU62	55;1	55;1	55;1	Structural maintenance of chromosomes protein 1A	Smc1a	sp|Q9CU62|SMC1A_MOUSE Structural maintenance of chromosomes protein 1A OS=Mus musculus OX=10090 GN=Smc1a PE=1 SV=4	2	55	55	55	44	48	45	38	45	38	44	48	45	38	45	38	44	48	45	38	45	38	48.7	48.7	48.7	143.23	1233	1233;54	3.36	136	87	109	97	47	0	305.83	By MS/MS	By MS/MS	By MS/MS	By MS/MS	By MS/MS	By MS/MS
Q9JIK5	Q9JIK5	54	54	54	Nucleolar RNA helicase 2	Ddx21	sp|Q9JIK5|DDX21_MOUSE Nucleolar RNA helicase 2 OS=Mus musculus OX=10090 GN=Ddx21 PE=1 SV=3	1	54	54	54	43	46	47	49	45	50	43	46	47	49	45	50	43	46	47	49	45	50	58.9	58.9	58.9	93.55	851	851	3.12	323	157	167	101	126	0	323.31	By MS/MS	By MS/MS	By MS/MS	By MS/MS	By MS/MS	By MS/MS
G3X9B1;A0A1Y7VNI1;A0A1Y7VNG8	G3X9B1	54;20;8	54;20;8	54;20;8		Heatr1	tr|G3X9B1|G3X9B1_MOUSE HEAT repeat-containing protein 1 OS=Mus musculus OX=10090 GN=Heatr1 PE=1 SV=1	3	54	54	54	40	41	45	46	42	46	40	41	45	46	42	46	40	41	45	46	42	46	29.1	29.1	29.1	242.07	2143	2143;744;344	3.56	182	31	59	66	149	0	217.1	By MS/MS	By MS/MS	By MS/MS	By MS/MS	By MS/MS	By MS/MS
Q922D8;A0A1W2P733;A0A1W2P7L5	Q922D8;A0A1W2P733	54;43;11	54;43;11	53;42;11	C-1-tetrahydrofolate synthase, cytoplasmic;Methylenetetrahydrofolate dehydrogenase;Methenyltetrahydrofolate cyclohydrolase;Formyltetrahydrofolate synthetase;C-1-tetrahydrofolate synthase, cytoplasmic, N-terminally processed	Mthfd1	sp|Q922D8|C1TC_MOUSE C-1-tetrahydrofolate synthase, cytoplasmic OS=Mus musculus OX=10090 GN=Mthfd1 PE=1 SV=4;tr|A0A1W2P733|A0A1W2P733_MOUSE C-1-tetrahydrofolate synthase, cytoplasmic OS=Mus musculus OX=10090 GN=Mthfd1 PE=1 SV=1	3	54	54	53	40	45	46	44	47	44	40	45	46	44	47	44	40	44	45	43	46	43	68	68	67.6	101.2	935	935;755;160	3.11	272	91	99	83	118	0	323.31	By MS/MS	By MS/MS	By MS/MS	By MS/MS	By MS/MS	By MS/MS
Q921K2;A0A0A6YY63;A0A0A6YVX0	Q921K2	54;4;1	54;4;1	20;2;1		Parp1	tr|Q921K2|Q921K2_MOUSE Poly [ADP-ribose] polymerase OS=Mus musculus OX=10090 GN=Parp1 PE=1 SV=1	3	54	54	20	45	46	48	42	45	42	45	46	48	42	45	42	16	15	18	12	17	16	53.3	53.3	19.4	112.72	1014	1014;68;99	3.77	269	77	190	263	197	0	323.31	By MS/MS	By MS/MS	By MS/MS	By MS/MS	By MS/MS	By MS/MS
Q91ZW3	Q91ZW3	54	54	38	SWI/SNF-related matrix-associated actin-dependent regulator of chromatin subfamily A member 5	Smarca5	sp|Q91ZW3|SMCA5_MOUSE SWI/SNF-related matrix-associated actin-dependent regulator of chromatin subfamily A member 5 OS=Mus musculus OX=10090 GN=Smarca5 PE=1 SV=1	1	54	54	38	39	46	49	45	44	44	39	46	49	45	44	44	31	33	35	33	34	33	55.1	55.1	42.1	121.63	1051	1051	3.62	201	47	67	77	177	0	323.31	By MS/MS	By MS/MS	By MS/MS	By MS/MS	By MS/MS	By MS/MS
B2RQC6;E9QAI5;G3UWN2;E9QAT6;F6S3Z3	B2RQC6;E9QAI5;G3UWN2	53;53;50;24;2	53;53;50;24;2	51;51;48;24;2	CAD protein;Glutamine-dependent carbamoyl-phosphate synthase;Aspartate carbamoyltransferase;Dihydroorotase	Cad	sp|B2RQC6|PYR1_MOUSE CAD protein OS=Mus musculus OX=10090 GN=Cad PE=1 SV=1;tr|E9QAI5|E9QAI5_MOUSE Aspartate carbamoyltransferase OS=Mus musculus OX=10090 GN=Cad PE=1 SV=1;tr|G3UWN2|G3UWN2_MOUSE CAD protein OS=Mus musculus OX=10090 GN=Cad PE=1 SV=1	5	53	53	51	31	43	40	42	38	38	31	43	40	42	38	38	30	42	39	41	37	37	32.1	32.1	31.8	243.24	2225	2225;2162;2164;971;194	3.43	173	34	76	100	92	0	323.31	By MS/MS	By MS/MS	By MS/MS	By MS/MS	By MS/MS	By MS/MS
F6XCT0	F6XCT0	53	2	2		Macf1	tr|F6XCT0|F6XCT0_MOUSE Microtubule-actin cross-linking factor 1 (Fragment) OS=Mus musculus OX=10090 GN=Macf1 PE=1 SV=1	1	53	2	2	41	35	44	38	32	36	2	2	2	2	2	2	2	2	2	2	2	2	36.8	1.5	1.5	211.68	1837	1837	3.5		6	6			0	8.1843	By MS/MS	By MS/MS	By MS/MS	By MS/MS	By MS/MS	By MS/MS
O88738;S4R1L5;S4R2P8;A0A3Q4EH00;S4R268;J3QP64;REV__Q5NCS9;REV__S4R268	O88738;S4R1L5;S4R2P8	52;52;52;3;3;2;1;1	52;52;52;3;3;2;1;1	51;51;51;3;2;2;0;0	Baculoviral IAP repeat-containing protein 6	Birc6	sp|O88738|BIRC6_MOUSE Baculoviral IAP repeat-containing protein 6 OS=Mus musculus OX=10090 GN=Birc6 PE=1 SV=2;tr|S4R1L5|S4R1L5_MOUSE Baculoviral IAP repeat-containing protein 6 OS=Mus musculus OX=10090 GN=Birc6 PE=1 SV=1;tr|S4R2P8|S4R2P8_MOUSE Baculoviral	8	52	52	51	33	33	38	37	37	36	33	33	38	37	37	36	33	32	38	37	37	36	14.1	14.1	13.9	532.16	4882	4882;4853;4869;255;597;973;454;597	4.3	73	38	40	36	162	0	215.25	By MS/MS	By MS/MS	By MS/MS	By MS/MS	By MS/MS	By MS/MS
P13864	P13864	52	52	8	DNA (cytosine-5)-methyltransferase 1	Dnmt1	sp|P13864|DNMT1_MOUSE DNA (cytosine-5)-methyltransferase 1 OS=Mus musculus OX=10090 GN=Dnmt1 PE=1 SV=5	1	52	52	8	46	47	48	44	47	44	46	47	48	44	47	44	7	8	5	6	7	7	42.1	42.1	6	183.19	1620	1620	3.21	224	102	101	74	109	0	323.31	By MS/MS	By MS/MS	By MS/MS	By MS/MS	By MS/MS	By MS/MS
E9PVZ8;E9QAH1;Q9CTU9	E9PVZ8;E9QAH1	52;52;1	52;52;1	52;52;1		Golgb1	tr|E9PVZ8|E9PVZ8_MOUSE Golgi autoantigen, golgin subfamily b, macrogolgin 1 OS=Mus musculus OX=10090 GN=Golgb1 PE=1 SV=1;tr|E9QAH1|E9QAH1_MOUSE Golgi autoantigen, golgin subfamily b, macrogolgin 1 OS=Mus musculus OX=10090 GN=Golgb1 PE=1 SV=1	3	52	52	52	36	22	31	18	34	30	36	22	31	18	34	30	36	22	31	18	34	30	20.3	20.3	20.3	370.15	3238	3238;3197;146	4.07	1	65	62	43	19	0	153.35	By MS/MS	By MS/MS	By MS/MS	By MS/MS	By MS/MS	By MS/MS
P14873	P14873	52	52	51	Microtubule-associated protein 1B;MAP1B heavy chain;MAP1 light chain LC1	Map1b	sp|P14873|MAP1B_MOUSE Microtubule-associated protein 1B OS=Mus musculus OX=10090 GN=Map1b PE=1 SV=2	1	52	52	51	39	29	38	39	44	45	39	29	38	39	44	45	38	28	37	38	43	44	30.6	30.6	30.6	270.25	2464	2464	3.41	99	68	128	60	37	0	316.58	By MS/MS	By MS/MS	By MS/MS	By MS/MS	By MS/MS	By MS/MS
Q9D0E1	Q9D0E1	51	51	6	Heterogeneous nuclear ribonucleoprotein M	Hnrnpm	sp|Q9D0E1|HNRPM_MOUSE Heterogeneous nuclear ribonucleoprotein M OS=Mus musculus OX=10090 GN=Hnrnpm PE=1 SV=3	1	51	51	6	39	42	41	40	41	39	39	42	41	40	41	39	5	6	5	5	5	3	73.4	73.4	5.3	77.648	729	729	3.68	355	396	137	260	360	0	323.31	By MS/MS	By MS/MS	By MS/MS	By MS/MS	By MS/MS	By MS/MS
E9QAE4;O88491;A0A286YE36;A0A286YDS9	E9QAE4;O88491;A0A286YE36	50;47;47;3	50;47;47;3	50;47;47;3	Histone-lysine N-methyltransferase;Histone-lysine N-methyltransferase, H3 lysine-36 and H4 lysine-20 specific	Nsd1	tr|E9QAE4|E9QAE4_MOUSE Histone-lysine N-methyltransferase, H3 lysine-36-specific OS=Mus musculus OX=10090 GN=Nsd1 PE=1 SV=1;sp|O88491|NSD1_MOUSE Histone-lysine N-methyltransferase, H3 lysine-36 specific OS=Mus musculus OX=10090 GN=Nsd1 PE=1 SV=1;tr|A0A286Y	4	50	50	50	41	37	39	31	38	38	41	37	39	31	38	38	41	37	39	31	38	38	25.2	25.2	25.2	296.36	2691	2691;2588;2588;158	3.72	71	76	77	42	76	0	252.17	By MS/MS	By MS/MS	By MS/MS	By MS/MS	By MS/MS	By MS/MS
A2AQ25;E9QAU4;D3Z781;Q8BHR1;A0A5F8MPV1;B1AY50;B1AY49	A2AQ25;E9QAU4;D3Z781	50;50;31;12;4;1;1	50;50;31;12;4;1;1	50;50;31;12;4;1;1	Sickle tail protein	Skt;Etl4	sp|A2AQ25|SKT_MOUSE Sickle tail protein OS=Mus musculus OX=10090 GN=Skt PE=1 SV=1;tr|E9QAU4|E9QAU4_MOUSE Enhancer trap locus 4 OS=Mus musculus OX=10090 GN=Etl4 PE=1 SV=1;tr|D3Z781|D3Z781_MOUSE Enhancer trap locus 4 OS=Mus musculus OX=10090 GN=Etl4 PE=1 SV=	7	50	50	50	38	26	42	16	28	24	38	26	42	16	28	24	38	26	42	16	28	24	33.2	33.2	33.2	213.03	1946	1946;1997;1347;480;277;173;220	3.96	29	55	59	41	46	0	191.49	By MS/MS	By MS/MS	By MS/MS	By MS/MS	By MS/MS	By MS/MS
Q62383	Q62383	50	50	50	Transcription elongation factor SPT6	Supt6h	sp|Q62383|SPT6H_MOUSE Transcription elongation factor SPT6 OS=Mus musculus OX=10090 GN=Supt6h PE=1 SV=2	1	50	50	50	36	40	43	33	40	33	36	40	43	33	40	33	36	40	43	33	40	33	40.9	40.9	40.9	199.08	1726	1726	3.61	118	48	102	71	83	0	298.87	By MS/MS	By MS/MS	By MS/MS	By MS/MS	By MS/MS	By MS/MS
E9PXY8;F8VPX1;Q6A4J8;G3UWR8	E9PXY8;F8VPX1;Q6A4J8	50;49;47;16	50;49;47;16	50;49;47;16	Ubiquitin carboxyl-terminal hydrolase;Ubiquitin carboxyl-terminal hydrolase 7	Usp7	tr|E9PXY8|E9PXY8_MOUSE Ubiquitin carboxyl-terminal hydrolase 7 OS=Mus musculus OX=10090 GN=Usp7 PE=1 SV=1;tr|F8VPX1|F8VPX1_MOUSE Ubiquitin carboxyl-terminal hydrolase 7 OS=Mus musculus OX=10090 GN=Usp7 PE=1 SV=1;sp|Q6A4J8|UBP7_MOUSE Ubiquitin carboxyl-term	4	50	50	50	33	41	41	38	36	35	33	41	41	38	36	35	33	41	41	38	36	35	49.6	49.6	49.6	132.85	1143	1143;1103;1103;327	3.52	171	66	67	78	128	0	323.31	By MS/MS	By MS/MS	By MS/MS	By MS/MS	By MS/MS	By MS/MS
O08810;A2AH85;G3UZ34;G3UXK8;G3UZ25	O08810;A2AH85;G3UZ34	49;48;46;6;1	48;47;45;5;1	48;47;45;5;1	116 kDa U5 small nuclear ribonucleoprotein component	Eftud2	sp|O08810|U5S1_MOUSE 116 kDa U5 small nuclear ribonucleoprotein component OS=Mus musculus OX=10090 GN=Eftud2 PE=1 SV=1;tr|A2AH85|A2AH85_MOUSE 116 kDa U5 small nuclear ribonucleoprotein component OS=Mus musculus OX=10090 GN=Eftud2 PE=1 SV=1;tr|G3UZ34|G3UZ34	5	49	48	48	36	41	43	37	36	33	35	40	43	36	36	32	35	40	43	36	36	32	64.7	64.7	64.7	109.36	971	971;972;962;85;98	3.43	206	63	83	117	116	0	323.31	By MS/MS	By MS/MS	By MS/MS	By MS/MS	By MS/MS	By MS/MS
Q64737;D6RCG1;A0A338P6X4;A0A338P676;A0A338P6W0;A0A338P6T2	Q64737	49;14;10;3;3;2	49;14;10;3;3;2	49;14;10;3;3;2	Trifunctional purine biosynthetic protein adenosine-3;Phosphoribosylamine--glycine ligase;Phosphoribosylformylglycinamidine cyclo-ligase;Phosphoribosylglycinamide formyltransferase	Gart	sp|Q64737|PUR2_MOUSE Trifunctional purine biosynthetic protein adenosine-3 OS=Mus musculus OX=10090 GN=Gart PE=1 SV=3	6	49	49	49	38	42	44	48	47	43	38	42	44	48	47	43	38	42	44	48	47	43	63	63	63	107.5	1010	1010;306;199;64;82;99	3.41	344	77	83	185	199	0	323.31	By MS/MS	By MS/MS	By MS/MS	By MS/MS	By MS/MS	By MS/MS
Q9EPU0	Q9EPU0	49	49	48	Regulator of nonsense transcripts 1	Upf1	sp|Q9EPU0|RENT1_MOUSE Regulator of nonsense transcripts 1 OS=Mus musculus OX=10090 GN=Upf1 PE=1 SV=2	1	49	49	48	36	36	44	36	38	39	36	36	44	36	38	39	36	36	44	35	38	39	53.4	53.4	52.8	123.97	1124	1124	3.56	177	41	71	110	117	0	323.31	By MS/MS	By MS/MS	By MS/MS	By MS/MS	By MS/MS	By MS/MS
Q7TPR4;A1BN54	Q7TPR4;A1BN54	48;48	24;24	23;23	Alpha-actinin-1	Actn1	sp|Q7TPR4|ACTN1_MOUSE Alpha-actinin-1 OS=Mus musculus OX=10090 GN=Actn1 PE=1 SV=1;tr|A1BN54|A1BN54_MOUSE Alpha-actinin cytoskeletal isoform OS=Mus musculus OX=10090 GN=Actn1 PE=1 SV=1	2	48	24	23	38	41	46	41	39	36	20	20	24	21	21	19	19	20	23	21	21	19	62.7	39.3	37.7	103.07	892	892;887	3.2	145	58	89	50	61	0	323.31	By MS/MS	By MS/MS	By MS/MS	By MS/MS	By MS/MS	By MS/MS
P25206	P25206	48	48	48	DNA replication licensing factor MCM3	Mcm3	sp|P25206|MCM3_MOUSE DNA replication licensing factor MCM3 OS=Mus musculus OX=10090 GN=Mcm3 PE=1 SV=2	1	48	48	48	45	44	44	43	41	42	45	44	44	43	41	42	45	44	44	43	41	42	66.1	66.1	66.1	91.545	812	812	3.25	276	94	131	108	131	0	323.31	By MS/MS	By MS/MS	By MS/MS	By MS/MS	By MS/MS	By MS/MS
B1AU75;B1AU76	B1AU75;B1AU76	48;28	48;28	1;0		Nasp	tr|B1AU75|B1AU75_MOUSE Nuclear autoantigenic sperm protein OS=Mus musculus OX=10090 GN=Nasp PE=1 SV=1;tr|B1AU76|B1AU76_MOUSE Nuclear autoantigenic sperm protein OS=Mus musculus OX=10090 GN=Nasp PE=1 SV=1	2	48	48	1	41	41	45	38	41	37	41	41	45	38	41	37	1	1	1	1	1	1	71.9	71.9	1.9	84.012	773	773;448	3.18	266	240	159	124	95	0	323.31	By MS/MS	By MS/MS	By MS/MS	By MS/MS	By MS/MS	By MS/MS
Q6A026;E9QPI5;A0A0J9YV33	Q6A026;E9QPI5	48;48;3	48;48;3	44;44;3	Sister chromatid cohesion protein PDS5 homolog A	Pds5a	sp|Q6A026|PDS5A_MOUSE Sister chromatid cohesion protein PDS5 homolog A OS=Mus musculus OX=10090 GN=Pds5a PE=1 SV=3;tr|E9QPI5|E9QPI5_MOUSE Sister chromatid cohesion protein PDS5 homolog A OS=Mus musculus OX=10090 GN=Pds5a PE=1 SV=1	3	48	48	44	41	38	42	36	39	42	41	38	42	36	39	42	37	34	38	32	35	38	42.8	42.8	39.8	150.33	1332	1332;1332;140	3.64	124	74	83	86	97	0	323.31	By MS/MS	By MS/MS	By MS/MS	By MS/MS	By MS/MS	By MS/MS
Q9CW03	Q9CW03	48	48	48	Structural maintenance of chromosomes protein 3	Smc3	sp|Q9CW03|SMC3_MOUSE Structural maintenance of chromosomes protein 3 OS=Mus musculus OX=10090 GN=Smc3 PE=1 SV=2	1	48	48	48	38	40	42	40	42	37	38	40	42	40	42	37	38	40	42	40	42	37	46.8	46.8	46.8	141.55	1217	1217	3.5	172	61	113	110	95	0	302.54	By MS/MS	By MS/MS	By MS/MS	By MS/MS	By MS/MS	By MS/MS
E9PUM4;A0A1L1SQ51;Q71LX4;Q8CDM9;A0A1L1SRI1;A0A1L1SQP9;A0A1L1SVA8	E9PUM4;A0A1L1SQ51;Q71LX4;Q8CDM9;A0A1L1SRI1	48;48;45;31;31;20;2	41;41;38;26;26;16;2	41;41;38;26;26;16;2	Talin-2	Tln2	tr|E9PUM4|E9PUM4_MOUSE Talin-2 OS=Mus musculus OX=10090 GN=Tln2 PE=1 SV=1;tr|A0A1L1SQ51|A0A1L1SQ51_MOUSE Talin-2 OS=Mus musculus OX=10090 GN=Tln2 PE=1 SV=1;sp|Q71LX4|TLN2_MOUSE Talin-2 OS=Mus musculus OX=10090 GN=Tln2 PE=1 SV=3;tr|Q8CDM9|Q8CDM9_MOUSE Talin	7	48	41	41	36	30	38	19	28	33	29	24	32	13	22	26	29	24	32	13	22	26	27.6	23.6	23.6	271.66	2542	2542;2544;2375;1452;1471;923;137	3.89	23	37	61	40	23	0	181.29	By MS/MS	By MS/MS	By MS/MS	By MS/MS	By MS/MS	By MS/MS
Q62318	Q62318	48	48	48	Transcription intermediary factor 1-beta	Trim28	sp|Q62318|TIF1B_MOUSE Transcription intermediary factor 1-beta OS=Mus musculus OX=10090 GN=Trim28 PE=1 SV=3	1	48	48	48	43	48	46	45	44	43	43	48	46	45	44	43	43	48	46	45	44	43	71.8	71.8	71.8	88.846	834	834	3.54	532	251	290	309	369	0	323.31	By MS/MS	By MS/MS	By MS/MS	By MS/MS	By MS/MS	By MS/MS
Q02053	Q02053	48	48	36	Ubiquitin-like modifier-activating enzyme 1	Uba1	sp|Q02053|UBA1_MOUSE Ubiquitin-like modifier-activating enzyme 1 OS=Mus musculus OX=10090 GN=Uba1 PE=1 SV=1	1	48	48	36	36	41	42	40	37	37	36	41	42	40	37	37	28	32	31	29	28	28	54	54	44.9	117.81	1058	1058	3.46	273	55	146	149	153	0	323.31	By MS/MS	By MS/MS	By MS/MS	By MS/MS	By MS/MS	By MS/MS
E9QNN1;Q3UR42	E9QNN1;Q3UR42	47;28	47;28	2;2		Dhx9	tr|E9QNN1|E9QNN1_MOUSE RNA helicase OS=Mus musculus OX=10090 GN=Dhx9 PE=1 SV=1;tr|Q3UR42|Q3UR42_MOUSE ATP-dependent RNA helicase A (Fragment) OS=Mus musculus OX=10090 GN=Dhx9 PE=1 SV=1	2	47	47	2	37	44	44	36	37	35	37	44	44	36	37	35	2	2	2	2	2	2	41	41	2	149.69	1384	1384;735	3.52	212	63	71	144	129	0	323.31	By MS/MS	By MS/MS	By MS/MS	By MS/MS	By MS/MS	By MS/MS
P63017;Q504P4;D3Z5E2	P63017;Q504P4	47;44;11	47;44;11	33;30;6	Heat shock cognate 71 kDa protein	Hspa8	sp|P63017|HSP7C_MOUSE Heat shock cognate 71 kDa protein OS=Mus musculus OX=10090 GN=Hspa8 PE=1 SV=1;tr|Q504P4|Q504P4_MOUSE Heat shock cognate 71 kDa protein OS=Mus musculus OX=10090 GN=Hspa8 PE=1 SV=1	3	47	47	33	43	42	42	43	45	44	43	42	42	43	45	44	30	29	30	30	32	32	77.9	77.9	70.4	70.87	646	646;627;116	3.81	608	334	672	641	494	0	323.31	By MS/MS	By MS/MS	By MS/MS	By MS/MS	By MS/MS	By MS/MS
P63038;D3Z2F2;D3Z7J9	P63038	47;14;6	47;14;6	47;14;6	60 kDa heat shock protein, mitochondrial	Hspd1	sp|P63038|CH60_MOUSE 60 kDa heat shock protein, mitochondrial OS=Mus musculus OX=10090 GN=Hspd1 PE=1 SV=1	3	47	47	47	42	44	42	45	44	41	42	44	42	45	44	41	42	44	42	45	44	41	77.8	77.8	77.8	60.955	573	573;202;142	3.58	435	457	362	396	276	0	323.31	By MS/MS	By MS/MS	By MS/MS	By MS/MS	By MS/MS	By MS/MS
A0A087WNZ7;A0A087WRV6;A0A087WP92;A0A087WQ02;A0A087WSG4;A0A087WS65;Q3TP48	A0A087WNZ7	47;20;5;4;3;2;2	1;0;0;0;0;0;0	1;0;0;0;0;0;0		Trip12	tr|A0A087WNZ7|A0A087WNZ7_MOUSE E3 ubiquitin-protein ligase TRIP12 OS=Mus musculus OX=10090 GN=Trip12 PE=1 SV=1	7	47	1	1	37	40	37	34	35	31	1	1	1	1	1	1	1	1	1	1	1	1	30.8	0.7	0.7	220.66	1992	1992;830;423;346;213;65;146	2.36	6	5	3			0	5.5979	By MS/MS	By MS/MS	By MS/MS	By matching	By MS/MS	By MS/MS
G5E870;A0A0B4J1N9	G5E870	47;21	47;21	1;1	E3 ubiquitin-protein ligase TRIP12	Trip12	sp|G5E870|TRIPC_MOUSE E3 ubiquitin-protein ligase TRIP12 OS=Mus musculus OX=10090 GN=Trip12 PE=1 SV=1	2	47	47	1	37	40	37	34	35	30	37	40	37	34	35	30	1	1	1	1	1	0	30.7	30.7	1	224.13	2025	2025;982	3.67	152	34	81	81	127	0	323.31	By MS/MS	By MS/MS	By MS/MS	By MS/MS	By MS/MS	By MS/MS
Q01853	Q01853	47	47	47	Transitional endoplasmic reticulum ATPase	Vcp	sp|Q01853|TERA_MOUSE Transitional endoplasmic reticulum ATPase OS=Mus musculus OX=10090 GN=Vcp PE=1 SV=4	1	47	47	47	42	37	45	42	44	40	42	37	45	42	44	40	42	37	45	42	44	40	74.4	74.4	74.4	89.321	806	806	3.45	312	85	133	161	188	0	323.31	By MS/MS	By MS/MS	By MS/MS	By MS/MS	By MS/MS	By MS/MS
A0A087WPL5;O70133;A0A0R4J2C3;A0A087WRT3	A0A087WPL5;O70133	46;43;17;1	1;1;1;0	1;1;1;0	ATP-dependent RNA helicase A	Dhx9	tr|A0A087WPL5|A0A087WPL5_MOUSE RNA helicase OS=Mus musculus OX=10090 GN=Dhx9 PE=1 SV=1;sp|O70133|DHX9_MOUSE ATP-dependent RNA helicase A OS=Mus musculus OX=10090 GN=Dhx9 PE=1 SV=2	4	46	1	1	36	43	43	35	36	34	1	1	1	1	1	1	1	1	1	1	1	1	41	2	2	149.62	1383	1383;1380;459;47	3	4		6	1		0	25.529	By MS/MS	By MS/MS	By MS/MS	By MS/MS	By MS/MS	By MS/MS
J3QNW0	J3QNW0	46	2	2	DNA (cytosine-5)-methyltransferase	Dnmt1	tr|J3QNW0|J3QNW0_MOUSE DNA (cytosine-5)-methyltransferase OS=Mus musculus OX=10090 GN=Dnmt1 PE=1 SV=1	1	46	2	2	40	40	45	39	42	39	1	1	2	1	2	2	1	1	2	1	2	2	40.2	1.2	1.2	169.95	1501	1501	3.58	2	4	1	5		0	8.8866	By MS/MS	By MS/MS	By MS/MS	By MS/MS	By MS/MS	By MS/MS
Q8VDJ3;A0A087WP83;A0A087WS92;A0A087WPC5;A0A087WQY9;A0A087WPH2	Q8VDJ3;A0A087WP83	46;43;11;10;9;1	46;43;11;10;9;1	46;43;11;10;9;1	Vigilin	Hdlbp	sp|Q8VDJ3|VIGLN_MOUSE Vigilin OS=Mus musculus OX=10090 GN=Hdlbp PE=1 SV=1;tr|A0A087WP83|A0A087WP83_MOUSE Vigilin OS=Mus musculus OX=10090 GN=Hdlbp PE=1 SV=1	6	46	46	46	38	33	37	35	39	43	38	33	37	35	39	43	38	33	37	35	39	43	43.1	43.1	43.1	141.74	1268	1268;1199;178;141;129;22	3.35	155	90	67	92	75	0	323.31	By MS/MS	By MS/MS	By MS/MS	By MS/MS	By MS/MS	By MS/MS
P08113;F7C312	P08113;F7C312	46;28	44;28	44;28	Endoplasmin	Hsp90b1	sp|P08113|ENPL_MOUSE Endoplasmin OS=Mus musculus OX=10090 GN=Hsp90b1 PE=1 SV=2;tr|F7C312|F7C312_MOUSE Endoplasmin (Fragment) OS=Mus musculus OX=10090 GN=Hsp90b1 PE=1 SV=1	2	46	44	44	42	42	44	43	44	43	40	40	42	41	42	41	40	40	42	41	42	41	50.5	48.4	48.4	92.475	802	802;373	3.36	300	85	93	148	166	0	323.31	By MS/MS	By MS/MS	By MS/MS	By MS/MS	By MS/MS	By MS/MS
P29341;A0A2I3BR37;F6ZAX1;A2A5N3;Q8C7D3	P29341	46;10;6;4;1	46;10;6;4;1	23;5;4;1;1	Polyadenylate-binding protein 1	Pabpc1	sp|P29341|PABP1_MOUSE Polyadenylate-binding protein 1 OS=Mus musculus OX=10090 GN=Pabpc1 PE=1 SV=2	5	46	46	23	38	42	40	44	44	41	38	42	40	44	44	41	19	20	18	22	22	20	67.6	67.6	43.7	70.67	636	636;126;118;607;381	3.34	376	34	104	133	227	0	323.31	By MS/MS	By MS/MS	By MS/MS	By MS/MS	By MS/MS	By MS/MS
Q3V117;Q91V92;Q3TS02	Q3V117;Q91V92	45;43;22	45;43;22	45;43;22	ATP-citrate synthase	Acly	tr|Q3V117|Q3V117_MOUSE ATP-citrate synthase OS=Mus musculus OX=10090 GN=Acly PE=1 SV=1;sp|Q91V92|ACLY_MOUSE ATP-citrate synthase OS=Mus musculus OX=10090 GN=Acly PE=1 SV=1	3	45	45	45	35	36	37	43	39	40	35	36	37	43	39	40	35	36	37	43	39	40	52.6	52.6	52.6	120.79	1101	1101;1091;491	3.49	198	42	110	96	125	0	323.31	By MS/MS	By MS/MS	By MS/MS	By MS/MS	By MS/MS	By MS/MS
Q8CJF7;F6S6E4;F6SJR1;F6QTR3	Q8CJF7	45;8;6;2	45;8;6;2	45;8;6;2	Protein ELYS	Ahctf1	sp|Q8CJF7|ELYS_MOUSE Protein ELYS OS=Mus musculus OX=10090 GN=Ahctf1 PE=1 SV=1	4	45	45	45	35	36	40	30	38	35	35	36	40	30	38	35	35	36	40	30	38	35	25.1	25.1	25.1	247.64	2243	2243;116;176;104	3.74	67	51	93	55	56	0	251.96	By MS/MS	By MS/MS	By MS/MS	By MS/MS	By MS/MS	By MS/MS
Q6NZJ6;E9PVC6;E9Q9E1;E9PVC5;A0A0J9YUS5;A0A0J9YVC1;A0A0J9YUC1;E9Q770;A0A0J9YUL1;D3Z439;A0A0J9YU44;A0A0J9YTV0;D3YWY7;D3YWM1	Q6NZJ6;E9PVC6;E9Q9E1;E9PVC5;A0A0J9YUS5	45;45;45;45;43;22;22;22;2;2;1;1;1;1	45;45;45;45;43;22;22;22;2;2;1;1;1;1	41;41;41;41;39;19;19;19;2;2;1;1;1;1	Eukaryotic translation initiation factor 4 gamma 1	Eif4g1	sp|Q6NZJ6|IF4G1_MOUSE Eukaryotic translation initiation factor 4 gamma 1 OS=Mus musculus OX=10090 GN=Eif4g1 PE=1 SV=1;tr|E9PVC6|E9PVC6_MOUSE Eukaryotic translation initiation factor 4 gamma 1 OS=Mus musculus OX=10090 GN=Eif4g1 PE=1 SV=1;tr|E9Q9E1|E9Q9E1_MO	14	45	45	41	37	36	34	39	35	37	37	36	34	39	35	37	33	32	30	35	31	33	33.4	33.4	30.8	176.07	1600	1600;1553;1593;1594;1303;795;900;958;129;209;119;137;170;202	3.74	194	54	141	167	145	0	323.31	By MS/MS	By MS/MS	By MS/MS	By MS/MS	By MS/MS	By MS/MS
P20029	P20029	45	43	43	78 kDa glucose-regulated protein	Hspa5	sp|P20029|BIP_MOUSE Endoplasmic reticulum chaperone BiP OS=Mus musculus OX=10090 GN=Hspa5 PE=1 SV=3	1	45	43	43	33	38	39	34	39	36	31	36	37	32	37	34	31	36	37	32	37	34	54.5	52.8	52.8	72.421	655	655	3.73	201	103	111	209	144	0	323.31	By MS/MS	By MS/MS	By MS/MS	By MS/MS	By MS/MS	By MS/MS
Q61699;E9Q0U7;D3Z027;D3Z3I9;A0A0J9YTZ7	Q61699;E9Q0U7	45;43;7;5;4	43;41;7;5;4	43;41;7;5;4	Heat shock protein 105 kDa	Hsph1	sp|Q61699|HS105_MOUSE Heat shock protein 105 kDa OS=Mus musculus OX=10090 GN=Hsph1 PE=1 SV=2;tr|E9Q0U7|E9Q0U7_MOUSE Heat shock protein 105 kDa OS=Mus musculus OX=10090 GN=Hsph1 PE=1 SV=1	5	45	43	43	40	38	40	39	40	42	38	36	38	37	38	40	38	36	38	37	38	40	66.1	65	65	96.406	858	858;817;100;144;94	3.56	234	67	140	132	158	0	323.31	By MS/MS	By MS/MS	By MS/MS	By MS/MS	By MS/MS	By MS/MS
Q8BKC5	Q8BKC5	45	45	44	Importin-5	Ipo5	sp|Q8BKC5|IPO5_MOUSE Importin-5 OS=Mus musculus OX=10090 GN=Ipo5 PE=1 SV=3	1	45	45	44	29	39	32	41	39	39	29	39	32	41	39	39	28	38	31	40	38	38	60.2	60.2	59.1	123.59	1097	1097	4.03	236	37	125	168	300	0	323.31	By MS/MS	By MS/MS	By MS/MS	By MS/MS	By MS/MS	By MS/MS
P43247;G3UXD8;G3UWZ8	P43247	45;12;3	45;12;3	45;12;3	DNA mismatch repair protein Msh2	Msh2	sp|P43247|MSH2_MOUSE DNA mismatch repair protein Msh2 OS=Mus musculus OX=10090 GN=Msh2 PE=1 SV=1	3	45	45	45	37	39	43	38	36	33	37	39	43	38	36	33	37	39	43	38	36	33	55.9	55.9	55.9	104.15	935	935;210;68	3.56	229	44	112	122	158	0	323.31	By MS/MS	By MS/MS	By MS/MS	By MS/MS	By MS/MS	By MS/MS
P52480;A0A1L1SU37;A0A1L1SQV8;A0A1L1SSN6;A0A1L1STV8;A0A1L1SUV0;A0A1L1ST52;A0A1L1SVH2;P53657	P52480	45;19;15;14;14;13;4;2;1	45;19;15;14;14;13;4;2;1	44;19;15;14;14;13;4;2;0	Pyruvate kinase PKM	Pkm	sp|P52480|KPYM_MOUSE Pyruvate kinase PKM OS=Mus musculus OX=10090 GN=Pkm PE=1 SV=4	9	45	45	44	36	42	38	40	38	37	36	42	38	40	38	37	35	41	37	39	37	36	77.8	77.8	75.7	57.844	531	531;232;187;176;184;155;102;51;574	3.5	443	204	354	226	275	0	323.31	By MS/MS	By MS/MS	By MS/MS	By MS/MS	By MS/MS	By MS/MS
Q99NB9;G5E866;A0A087WNS2	Q99NB9;G5E866	45;45;4	45;45;4	45;45;4	Splicing factor 3B subunit 1	Sf3b1	sp|Q99NB9|SF3B1_MOUSE Splicing factor 3B subunit 1 OS=Mus musculus OX=10090 GN=Sf3b1 PE=1 SV=1;tr|G5E866|G5E866_MOUSE Splicing factor 3B subunit 1 OS=Mus musculus OX=10090 GN=Sf3b1 PE=1 SV=1	3	45	45	45	33	39	38	34	31	29	33	39	38	34	31	29	33	39	38	34	31	29	44.2	44.2	44.2	145.81	1304	1304;1304;144	3.6	176	27	46	79	144	0	275.04	By MS/MS	By MS/MS	By MS/MS	By MS/MS	By MS/MS	By MS/MS
Q78PY7;Q3TJ56;E9Q3E9	Q78PY7;Q3TJ56	45;28;11	45;28;11	45;28;11	Staphylococcal nuclease domain-containing protein 1	Snd1	sp|Q78PY7|SND1_MOUSE Staphylococcal nuclease domain-containing protein 1 OS=Mus musculus OX=10090 GN=Snd1 PE=1 SV=1;tr|Q3TJ56|Q3TJ56_MOUSE Staphylococcal nuclease domain-containing protein 1 OS=Mus musculus OX=10090 GN=Snd1 PE=1 SV=1	3	45	45	45	33	33	37	32	33	32	33	33	37	32	33	32	33	33	37	32	33	32	60.4	60.4	60.4	102.09	910	910;608;262	3.62	145	25	61	108	93	0	270.41	By MS/MS	By MS/MS	By MS/MS	By MS/MS	By MS/MS	By MS/MS
Q8BGQ7	Q8BGQ7	44	44	44	Alanine--tRNA ligase, cytoplasmic	Aars	sp|Q8BGQ7|SYAC_MOUSE Alanine--tRNA ligase, cytoplasmic OS=Mus musculus OX=10090 GN=Aars1 PE=1 SV=1	1	44	44	44	27	26	31	39	36	40	27	26	31	39	36	40	27	26	31	39	36	40	58.8	58.8	58.8	106.91	968	968	3.62	150	53	112	126	87	0	323.31	By MS/MS	By MS/MS	By MS/MS	By MS/MS	By MS/MS	By MS/MS
Q8BMJ2;A0A494BBF9;A0A494BA30;A0A494BA98	Q8BMJ2	44;7;5;4	44;7;5;4	44;7;5;4	Leucine--tRNA ligase, cytoplasmic	Lars	sp|Q8BMJ2|SYLC_MOUSE Leucine--tRNA ligase, cytoplasmic OS=Mus musculus OX=10090 GN=Lars1 PE=1 SV=2	4	44	44	44	37	33	39	43	41	40	37	33	39	43	41	40	37	33	39	43	41	40	47	47	47	134.19	1178	1178;213;102;99	3.79	204	19	90	162	168	0	323.31	By MS/MS	By MS/MS	By MS/MS	By MS/MS	By MS/MS	By MS/MS
P49718	P49718	44	44	44	DNA replication licensing factor MCM5	Mcm5	sp|P49718|MCM5_MOUSE DNA replication licensing factor MCM5 OS=Mus musculus OX=10090 GN=Mcm5 PE=1 SV=2	1	44	44	44	35	38	43	37	39	37	35	38	43	37	39	37	35	38	43	37	39	37	67.6	67.6	67.6	82.406	734	734	3.56	261	24	139	132	176	0	246.53	By MS/MS	By MS/MS	By MS/MS	By MS/MS	By MS/MS	By MS/MS
O35134;A0A0U1RPM9;A0A0U1RPX8	O35134	44;15;6	44;15;6	44;15;6	DNA-directed RNA polymerase I subunit RPA1	Polr1a	sp|O35134|RPA1_MOUSE DNA-directed RNA polymerase I subunit RPA1 OS=Mus musculus OX=10090 GN=Polr1a PE=1 SV=2	3	44	44	44	35	30	37	36	35	32	35	30	37	36	35	32	35	30	37	36	35	32	31.6	31.6	31.6	194.11	1717	1717;743;282	4.02	87	24	42	53	119	0	167.14	By MS/MS	By MS/MS	By MS/MS	By MS/MS	By MS/MS	By MS/MS
Q8CG48;B1AWH6	Q8CG48	44;18	44;18	44;18	Structural maintenance of chromosomes protein 2	Smc2	sp|Q8CG48|SMC2_MOUSE Structural maintenance of chromosomes protein 2 OS=Mus musculus OX=10090 GN=Smc2 PE=1 SV=2	2	44	44	44	37	35	38	39	37	39	37	35	38	39	37	39	37	35	38	39	37	39	41.9	41.9	41.9	134.24	1191	1191;471	3.52	148	38	108	92	82	0	300.59	By MS/MS	By MS/MS	By MS/MS	By MS/MS	By MS/MS	By MS/MS
Q9CWJ9	Q9CWJ9	43	43	43	Bifunctional purine biosynthesis protein PURH;Phosphoribosylaminoimidazolecarboxamide formyltransferase;IMP cyclohydrolase	Atic	sp|Q9CWJ9|PUR9_MOUSE Bifunctional purine biosynthesis protein ATIC OS=Mus musculus OX=10090 GN=Atic PE=1 SV=2	1	43	43	43	40	39	42	39	42	41	40	39	42	39	42	41	40	39	42	39	42	41	81.1	81.1	81.1	64.217	592	592	3.46	274	92	84	135	182	0	323.31	By MS/MS	By MS/MS	By MS/MS	By MS/MS	By MS/MS	By MS/MS
Q61687;F6RDB7;Q8C2S3;A0A0G2JFA5;A6PWK7;A0A0G2JFG6;Q3TA30;A0A0G2JED2;A6PWK9;A6PWL2;A0A0G2JF35	Q61687	43;16;14;13;8;7;7;4;3;2;1	43;16;14;13;8;7;7;4;3;2;1	31;5;3;4;3;3;3;3;1;0;1	Transcriptional regulator ATRX	Atrx	sp|Q61687|ATRX_MOUSE Transcriptional regulator ATRX OS=Mus musculus OX=10090 GN=Atrx PE=1 SV=3	11	43	43	31	34	32	40	31	33	30	34	32	40	31	33	30	23	25	29	25	22	20	22.4	22.4	16.7	278.58	2476	2476;995;385;520;208;135;181;526;89;61;78	3.63	80	76	95	50	65	0	230.31	By MS/MS	By MS/MS	By MS/MS	By MS/MS	By MS/MS	By MS/MS
A2A432;E9PXY1;J3QJX0	A2A432;E9PXY1;J3QJX0	43;38;23	43;38;23	37;32;21	Cullin-4B	Cul4b	sp|A2A432|CUL4B_MOUSE Cullin-4B OS=Mus musculus OX=10090 GN=Cul4b PE=1 SV=1;tr|E9PXY1|E9PXY1_MOUSE Cullin-4B OS=Mus musculus OX=10090 GN=Cul4b PE=1 SV=2;tr|J3QJX0|J3QJX0_MOUSE Cullin-4B OS=Mus musculus OX=10090 GN=Cul4b PE=1 SV=1	3	43	43	37	32	37	38	32	35	33	32	37	38	32	35	33	27	32	32	28	29	28	53.5	53.5	47.5	110.7	970	970;896;552	3.26	200	47	116	58	102	0	323.31	By MS/MS	By MS/MS	By MS/MS	By MS/MS	By MS/MS	By MS/MS
Q61656;Q8BTS0;S4R1I6;B1ARB9;B1ARC0;S4R1E3	Q61656;Q8BTS0;S4R1I6	43;43;33;10;9;5	43;43;33;10;9;5	32;32;24;10;9;5	Probable ATP-dependent RNA helicase DDX5	Ddx5	sp|Q61656|DDX5_MOUSE Probable ATP-dependent RNA helicase DDX5 OS=Mus musculus OX=10090 GN=Ddx5 PE=1 SV=2;tr|Q8BTS0|Q8BTS0_MOUSE DEAD box protein 5 OS=Mus musculus OX=10090 GN=Ddx5 PE=1 SV=1;tr|S4R1I6|S4R1I6_MOUSE RNA helicase OS=Mus musculus OX=10090 GN=Dd	6	43	43	32	36	38	41	38	37	39	36	38	41	38	37	39	26	28	31	28	27	28	65.1	65.1	55.5	69.289	614	614;615;406;182;167;71	3.55	296	37	123	170	192	0	323.31	By MS/MS	By MS/MS	By MS/MS	By MS/MS	By MS/MS	By MS/MS
Q61191;B1AUX2;F6SJS2	Q61191;B1AUX2	43;42;12	43;42;12	43;42;12	Host cell factor 1;HCF N-terminal chain 1;HCF N-terminal chain 2;HCF N-terminal chain 3;HCF N-terminal chain 4;HCF N-terminal chain 5;HCF N-terminal chain 6;HCF C-terminal chain 1;HCF C-terminal chain 2;HCF C-terminal chain 3;HCF C-terminal chain 4;HCF C-terminal chain 5;HCF C-terminal chain 6	Hcfc1	sp|Q61191|HCFC1_MOUSE Host cell factor 1 OS=Mus musculus OX=10090 GN=Hcfc1 PE=1 SV=2;tr|B1AUX2|B1AUX2_MOUSE Host cell factor 1 OS=Mus musculus OX=10090 GN=Hcfc1 PE=1 SV=1	3	43	43	43	35	33	40	29	38	37	35	33	40	29	38	37	35	33	40	29	38	37	31.5	31.5	31.5	210.43	2045	2045;2090;612	3.66	168	65	117	155	104	0	323.31	By MS/MS	By MS/MS	By MS/MS	By MS/MS	By MS/MS	By MS/MS
P97311;Q3ULG5	P97311;Q3ULG5	43;41	43;41	43;41	DNA replication licensing factor MCM6;DNA helicase	Mcm6	sp|P97311|MCM6_MOUSE DNA replication licensing factor MCM6 OS=Mus musculus OX=10090 GN=Mcm6 PE=1 SV=1;tr|Q3ULG5|Q3ULG5_MOUSE DNA helicase OS=Mus musculus OX=10090 GN=Mcm6 PE=1 SV=1	2	43	43	43	30	38	38	33	35	34	30	38	38	33	35	34	30	38	38	33	35	34	59.3	59.3	59.3	92.866	821	821;794	2.87	215	51	63	60	63	0	323.31	By MS/MS	By MS/MS	By MS/MS	By MS/MS	By MS/MS	By MS/MS
Q8CG47;E9Q2X6;Q3U763;A0A0A6YXY3	Q8CG47;E9Q2X6	43;43;12;5	43;43;12;5	43;43;12;5	Structural maintenance of chromosomes protein 4;Structural maintenance of chromosomes protein	Smc4	sp|Q8CG47|SMC4_MOUSE Structural maintenance of chromosomes protein 4 OS=Mus musculus OX=10090 GN=Smc4 PE=1 SV=1;tr|E9Q2X6|E9Q2X6_MOUSE Structural maintenance of chromosomes protein OS=Mus musculus OX=10090 GN=Smc4 PE=1 SV=1	4	43	43	43	30	31	37	31	31	29	30	31	37	31	31	29	30	31	37	31	31	29	36.9	36.9	36.9	146.89	1286	1286;1261;337;109	3.61	108	34	73	81	68	0	284.73	By MS/MS	By MS/MS	By MS/MS	By MS/MS	By MS/MS	By MS/MS
P80318;Q3U0I3;E9Q133;F6Q609;F6ZVG8	P80318;Q3U0I3;E9Q133;F6Q609	42;40;39;22;1	42;40;39;22;1	42;40;39;22;1	T-complex protein 1 subunit gamma	Cct3	sp|P80318|TCPG_MOUSE T-complex protein 1 subunit gamma OS=Mus musculus OX=10090 GN=Cct3 PE=1 SV=1;tr|Q3U0I3|Q3U0I3_MOUSE T-complex protein 1 subunit gamma OS=Mus musculus OX=10090 GN=Cct3 PE=1 SV=1;tr|E9Q133|E9Q133_MOUSE T-complex protein 1 subunit gamma O	5	42	42	42	34	41	37	39	37	37	34	41	37	39	37	37	34	41	37	39	37	37	72.1	72.1	72.1	60.629	545	545;521;507;306;85	3.76	300	26	118	222	244	0	323.31	By MS/MS	By MS/MS	By MS/MS	By MS/MS	By MS/MS	By MS/MS
P26231;A0A494BAD0;A0A494BAM5;A0A494BBB4;A0A494BBA4;A0A494BA24;A0A0N4SUZ7	P26231	42;18;7;5;2;1;1	42;18;7;5;2;1;1	31;16;6;4;1;1;0	Catenin alpha-1	Ctnna1	sp|P26231|CTNA1_MOUSE Catenin alpha-1 OS=Mus musculus OX=10090 GN=Ctnna1 PE=1 SV=1	7	42	42	31	38	35	38	34	33	36	38	35	38	34	33	36	28	26	28	26	25	27	63.8	63.8	51.4	100.11	906	906;415;156;122;62;37;243	3.59	204	50	122	120	140	0	323.31	By MS/MS	By MS/MS	By MS/MS	By MS/MS	By MS/MS	By MS/MS
Q8VEK3	Q8VEK3	42	42	42	Heterogeneous nuclear ribonucleoprotein U	Hnrnpu	sp|Q8VEK3|HNRPU_MOUSE Heterogeneous nuclear ribonucleoprotein U OS=Mus musculus OX=10090 GN=Hnrnpu PE=1 SV=1	1	42	42	42	37	41	41	39	38	39	37	41	41	39	38	39	37	41	41	39	38	39	52.5	52.5	52.5	87.917	800	800	3.42	330	107	159	202	168	0	323.31	By MS/MS	By MS/MS	By MS/MS	By MS/MS	By MS/MS	By MS/MS
A0A0R4J170;Q3TKT4;G3UX35;Q6DIC0;H3BLH0;F2Z4A9;H3BJK2;E9QAB8;A0A140LJD7;H3BKN5;A0A140LID0;A0A140LJK1;A0A140LHF4;A0A140LHP6;H3BK47;H3BJM2;A0A140LI14;Q9D007;A0A140LIQ9;A0A140LHE2;H3BLI4;H3BJI1;A0A140LHZ8;A0A140LIV3;A0A140LIM0;H3BKJ3	A0A0R4J170;Q3TKT4;G3UX35	42;42;34;14;14;14;13;13;4;3;3;1;1;1;1;1;1;1;1;1;1;1;1;1;1;1	42;42;34;14;14;14;13;13;4;3;3;1;1;1;1;1;1;1;1;1;1;1;1;1;1;1	41;41;33;13;13;13;12;12;3;3;3;1;1;1;1;1;1;1;1;1;1;1;1;1;1;1	Transcription activator BRG1	Smarca4	tr|A0A0R4J170|A0A0R4J170_MOUSE Transcription activator BRG1 OS=Mus musculus OX=10090 GN=Smarca4 PE=1 SV=1;sp|Q3TKT4|SMCA4_MOUSE Transcription activator BRG1 OS=Mus musculus OX=10090 GN=Smarca4 PE=1 SV=1;tr|G3UX35|G3UX35_MOUSE Transcription activator BRG1 (	26	42	42	41	28	28	34	29	27	29	28	28	34	29	27	29	28	27	33	28	27	29	30.2	30.2	29.7	181.85	1617	1617;1613;1267;1577;1601;1583;1525;1510;228;299;267;169;296;278;276;149;244;236;229;228;211;201;200;170;260;254	3.38	116	62	70	56	63	0	323.31	By MS/MS	By MS/MS	By MS/MS	By MS/MS	By MS/MS	By MS/MS
Q6P5D8;A0A3B2WD81	Q6P5D8	42;2	42;2	42;2	Structural maintenance of chromosomes flexible hinge domain-containing protein 1	Smchd1	sp|Q6P5D8|SMHD1_MOUSE Structural maintenance of chromosomes flexible hinge domain-containing protein 1 OS=Mus musculus OX=10090 GN=Smchd1 PE=1 SV=2	2	42	42	42	34	26	36	25	32	28	34	26	36	25	32	28	34	26	36	25	32	28	28.7	28.7	28.7	225.65	2007	2007;87	3.9	71	25	65	62	73	0	200.53	By MS/MS	By MS/MS	By MS/MS	By MS/MS	By MS/MS	By MS/MS
Q6P5F9;F6YA11;A2AKT6	Q6P5F9	42;9;4	42;9;4	42;9;4	Exportin-1	Xpo1	sp|Q6P5F9|XPO1_MOUSE Exportin-1 OS=Mus musculus OX=10090 GN=Xpo1 PE=1 SV=1	3	42	42	42	26	38	35	34	28	26	26	38	35	34	28	26	26	38	35	34	28	26	46.9	46.9	46.9	123.09	1071	1071;233;59	3.71	192	22	69	96	172	0	323.31	By MS/MS	By MS/MS	By MS/MS	By MS/MS	By MS/MS	By MS/MS
A2BH40;E9QAQ7	A2BH40;E9QAQ7	41;41	41;41	40;40	AT-rich interactive domain-containing protein 1A	Arid1a	sp|A2BH40|ARI1A_MOUSE AT-rich interactive domain-containing protein 1A OS=Mus musculus OX=10090 GN=Arid1a PE=1 SV=1;tr|E9QAQ7|E9QAQ7_MOUSE AT-rich interactive domain-containing protein 1A OS=Mus musculus OX=10090 GN=Arid1a PE=1 SV=1	2	41	41	40	33	30	36	24	28	24	33	30	36	24	28	24	32	29	35	23	27	23	25.3	25.3	25	242.09	2283	2283;2287	3.37	104	54	59	66	46	0	275.68	By MS/MS	By MS/MS	By MS/MS	By MS/MS	By MS/MS	By MS/MS
Q3U1J4;A0A494B987;A0A494BBJ6	Q3U1J4	41;16;2	41;16;2	27;15;2	DNA damage-binding protein 1	Ddb1	sp|Q3U1J4|DDB1_MOUSE DNA damage-binding protein 1 OS=Mus musculus OX=10090 GN=Ddb1 PE=1 SV=2	3	41	41	27	27	38	33	35	27	27	27	38	33	35	27	27	19	24	21	22	18	18	40.3	40.3	28.4	126.85	1140	1140;451;196	3.76	143	32	61	94	128	0	196.46	By MS/MS	By MS/MS	By MS/MS	By MS/MS	By MS/MS	By MS/MS
P38647	P38647	41	41	41	Stress-70 protein, mitochondrial	Hspa9	sp|P38647|GRP75_MOUSE Stress-70 protein, mitochondrial OS=Mus musculus OX=10090 GN=Hspa9 PE=1 SV=3	1	41	41	41	34	37	39	38	38	38	34	37	39	38	38	38	34	37	39	38	38	38	64.1	64.1	64.1	73.46	679	679	3.58	313	110	124	225	206	0	323.31	By MS/MS	By MS/MS	By MS/MS	By MS/MS	By MS/MS	By MS/MS
Q6P9P6	Q6P9P6	41	41	41	Kinesin-like protein KIF11	Kif11	sp|Q6P9P6|KIF11_MOUSE Kinesin-like protein KIF11 OS=Mus musculus OX=10090 GN=Kif11 PE=1 SV=1	1	41	41	41	32	31	35	27	29	30	32	31	35	27	29	30	32	31	35	27	29	30	46.5	46.5	46.5	118.03	1052	1052	3.66	85	31	74	75	52	0	239.44	By MS/MS	By MS/MS	By MS/MS	By MS/MS	By MS/MS	By MS/MS
A2AWL7;H7BX50;E9QLG3	A2AWL7;H7BX50;E9QLG3	41;41;41	41;41;41	41;41;41	MAX gene-associated protein	Mga	sp|A2AWL7|MGAP_MOUSE MAX gene-associated protein OS=Mus musculus OX=10090 GN=Mga PE=2 SV=1;tr|H7BX50|H7BX50_MOUSE MAX gene-associated protein OS=Mus musculus OX=10090 GN=Mga PE=1 SV=1;tr|E9QLG3|E9QLG3_MOUSE MAX gene-associated protein OS=Mus musculus OX=10	3	41	41	41	34	19	29	21	31	30	34	19	29	21	31	30	34	19	29	21	31	30	19	19	19	328.8	3003	3003;2833;3042	3.68	51	48	63	47	38	0	143.97	By MS/MS	By MS/MS	By MS/MS	By MS/MS	By MS/MS	By MS/MS
Q4VA53;F8WHU5	Q4VA53;F8WHU5	41;41	37;37	37;37	Sister chromatid cohesion protein PDS5 homolog B	Pds5b	sp|Q4VA53|PDS5B_MOUSE Sister chromatid cohesion protein PDS5 homolog B OS=Mus musculus OX=10090 GN=Pds5b PE=1 SV=1;tr|F8WHU5|F8WHU5_MOUSE Sister chromatid cohesion protein PDS5 homolog B OS=Mus musculus OX=10090 GN=Pds5b PE=1 SV=1	2	41	37	37	36	32	39	27	33	29	32	28	35	23	29	25	32	28	35	23	29	25	32.8	30	30	164.42	1446	1446;1449	4.09	57	37	52	61	86	0	234.45	By MS/MS	By MS/MS	By MS/MS	By MS/MS	By MS/MS	By MS/MS
S4R2J9;Q3TLH4;A0A0A0MQ79;S4R294;S4R2L9;S4R209;S4R2E2;S4R298	S4R2J9;Q3TLH4;A0A0A0MQ79;S4R294	41;40;40;38;15;15;9;4	41;40;40;38;15;15;9;4	41;40;40;38;15;15;9;4	Protein PRRC2C	Prrc2c	tr|S4R2J9|S4R2J9_MOUSE Protein PRRC2C OS=Mus musculus OX=10090 GN=Prrc2c PE=1 SV=1;sp|Q3TLH4|PRC2C_MOUSE Protein PRRC2C OS=Mus musculus OX=10090 GN=Prrc2c PE=1 SV=3;tr|A0A0A0MQ79|A0A0A0MQ79_MOUSE Protein PRRC2C OS=Mus musculus OX=10090 GN=Prrc2c PE=1 SV=1;	8	41	41	41	32	30	35	30	38	34	32	30	35	30	38	34	32	30	35	30	38	34	24	24	24	302.43	2765	2765;2846;2844;2724;1276;1515;564;149	3.09	139	115	78	53	44	0	323.31	By MS/MS	By MS/MS	By MS/MS	By MS/MS	By MS/MS	By MS/MS
Q8BTI8;A0A087WRX8;A0A3B2W3Z4;A0A087WPS9;A0A087WR98	Q8BTI8	41;5;5;4;1	41;5;5;4;1	41;5;5;4;1	Serine/arginine repetitive matrix protein 2	Srrm2	sp|Q8BTI8|SRRM2_MOUSE Serine/arginine repetitive matrix protein 2 OS=Mus musculus OX=10090 GN=Srrm2 PE=1 SV=3	5	41	41	41	35	35	35	32	35	32	35	35	35	32	35	32	35	35	35	32	35	32	22.6	22.6	22.6	294.84	2703	2703;171;191;88;105	3.38	154	66	115	136	39	0	323.31	By MS/MS	By MS/MS	By MS/MS	By MS/MS	By MS/MS	By MS/MS
Q9Z0U1;A0A3B2WBH9;A0A3B2WCN9;Q9QXY1;A0A494B9E6;Q921G9	Q9Z0U1;A0A3B2WBH9;A0A3B2WCN9	41;41;41;1;1;1	41;41;41;1;1;1	41;41;41;1;1;1	Tight junction protein ZO-2	Tjp2	sp|Q9Z0U1|ZO2_MOUSE Tight junction protein ZO-2 OS=Mus musculus OX=10090 GN=Tjp2 PE=1 SV=2;tr|A0A3B2WBH9|A0A3B2WBH9_MOUSE Tight junction protein ZO-2 OS=Mus musculus OX=10090 GN=Tjp2 PE=1 SV=1;tr|A0A3B2WCN9|A0A3B2WCN9_MOUSE Tight junction protein ZO-2 OS=M	6	41	41	41	29	34	36	30	33	29	29	34	36	30	33	29	29	34	36	30	33	29	41.7	41.7	41.7	131.28	1167	1167;1165;1190;905;171;904	3.26	158	31	66	81	64	0	292.99	By MS/MS	By MS/MS	By MS/MS	By MS/MS	By MS/MS	By MS/MS
A0A0N4SV80;A0A0N4SV38;Q3TZK9;A0A0N4SVM8;A0A0N4SUP3	A0A0N4SV80;A0A0N4SV38;Q3TZK9	41;33;23;19;9	41;33;23;19;9	1;0;0;0;0		Zfml	tr|A0A0N4SV80|A0A0N4SV80_MOUSE Zinc finger protein 638 OS=Mus musculus OX=10090 GN=Zfp638 PE=1 SV=1;tr|A0A0N4SV38|A0A0N4SV38_MOUSE Zinc finger protein 638 OS=Mus musculus OX=10090 GN=Zfp638 PE=1 SV=1;tr|Q3TZK9|Q3TZK9_MOUSE Zinc finger protein 638 (Fragment	5	41	41	1	34	32	33	27	33	34	34	32	33	27	33	34	1	1	1	1	1	1	29.1	29.1	0.5	214.46	1926	1926;1239;891;832;266	3.6	102	55	83	59	76	0	272.33	By MS/MS	By MS/MS	By MS/MS	By MS/MS	By MS/MS	By MS/MS
Q61464;E9QML5;A0A0N4SVI8;E9QKZ7	Q61464;E9QML5;A0A0N4SVI8;E9QKZ7	41;41;34;34	1;1;1;1	1;1;1;1	Zinc finger protein 638	Znf638;Zfml	sp|Q61464|ZN638_MOUSE Zinc finger protein 638 OS=Mus musculus OX=10090 GN=Znf638 PE=1 SV=2;tr|E9QML5|E9QML5_MOUSE Zinc finger protein 638 OS=Mus musculus OX=10090 GN=Zfp638 PE=1 SV=2;tr|A0A0N4SVI8|A0A0N4SVI8_MOUSE Zinc finger protein 638 OS=Mus musculus OX	4	41	1	1	34	31	32	26	32	34	1	0	0	0	0	1	1	0	0	0	0	1	28.9	0.9	0.9	218.13	1960	1960;1960;1273;1275	3		2				0.005227	2.2234	By MS/MS	By matching	By matching	By matching	By matching	By matching
O55143	O55143	40	40	29	Sarcoplasmic/endoplasmic reticulum calcium ATPase 2	Atp2a2	sp|O55143|AT2A2_MOUSE Sarcoplasmic/endoplasmic reticulum calcium ATPase 2 OS=Mus musculus OX=10090 GN=Atp2a2 PE=1 SV=2	1	40	40	29	31	32	33	30	31	28	31	32	33	30	31	28	22	23	26	22	24	20	44.9	44.9	32.3	114.86	1044	1044	3.5	150	55	104	90	87	0	323.31	By MS/MS	By MS/MS	By MS/MS	By MS/MS	By MS/MS	By MS/MS
O08528;E9Q5B5;E9Q9M6	O08528;E9Q5B5	40;38;4	40;38;4	34;32;3	Hexokinase-2;Hexokinase	Hk2	sp|O08528|HXK2_MOUSE Hexokinase-2 OS=Mus musculus OX=10090 GN=Hk2 PE=1 SV=1;tr|E9Q5B5|E9Q5B5_MOUSE Hexokinase OS=Mus musculus OX=10090 GN=Hk2 PE=1 SV=1	3	40	40	34	33	37	37	37	36	34	33	37	37	37	36	34	27	31	31	31	30	28	47.5	47.5	40.7	102.53	917	917;889;43	3.62	195	76	67	112	159	0	323.31	By MS/MS	By MS/MS	By MS/MS	By MS/MS	By MS/MS	By MS/MS
Q9Z1X4;Q45VK5;A0A1L1SU19;A0A1L1SSU8;A0A1L1SQR7;A0A1L1ST48;A0A1L1SR62;A0A1L1SQ69	Q9Z1X4;Q45VK5	40;35;6;6;6;6;3;3	40;35;6;6;6;6;3;3	3;0;0;0;0;0;0;0	Interleukin enhancer-binding factor 3	Ilf3	sp|Q9Z1X4|ILF3_MOUSE Interleukin enhancer-binding factor 3 OS=Mus musculus OX=10090 GN=Ilf3 PE=1 SV=2;tr|Q45VK5|Q45VK5_MOUSE Interleukin enhancer-binding factor 3 OS=Mus musculus OX=10090 GN=Ilf3 PE=1 SV=1	8	40	40	3	34	34	39	30	34	32	34	34	39	30	34	32	2	3	3	2	2	2	65	65	8.8	96.02	898	898;703;126;168;177;214;74;77	3.25	215	100	157	71	96	0	323.31	By MS/MS	By MS/MS	By MS/MS	By MS/MS	By MS/MS	By MS/MS
P97313	P97313	40	40	40	DNA-dependent protein kinase catalytic subunit	Prkdc	sp|P97313|PRKDC_MOUSE DNA-dependent protein kinase catalytic subunit OS=Mus musculus OX=10090 GN=Prkdc PE=1 SV=3	1	40	40	40	28	25	28	4	6	9	28	25	28	4	6	9	28	25	28	4	6	9	10.7	10.7	10.7	471.47	4128	4128	5.08	3	12	10	25	54	0	75.291	By MS/MS	By MS/MS	By MS/MS	By MS/MS	By MS/MS	By MS/MS
Q571H0;E9PU96	Q571H0;E9PU96	40;40	40;40	40;40	Nucleolar pre-ribosomal-associated protein 1	Urb1	sp|Q571H0|NPA1P_MOUSE Nucleolar pre-ribosomal-associated protein 1 OS=Mus musculus OX=10090 GN=Urb1 PE=1 SV=2;tr|E9PU96|E9PU96_MOUSE Nucleolar pre-ribosomal-associated protein 1 OS=Mus musculus OX=10090 GN=Urb1 PE=1 SV=1	2	40	40	40	18	30	25	32	21	22	18	30	25	32	21	22	18	30	25	32	21	22	23	23	23	254.61	2274	2274;2277	4.39	44	14	35	10	109	0	128.68	By MS/MS	By MS/MS	By MS/MS	By MS/MS	By MS/MS	By MS/MS
Q9Z1Q9;G3UY93;G3UZ22;G3UYW2;G3UZX1	Q9Z1Q9;G3UY93	40;38;7;3;3	40;38;7;3;3	40;38;7;3;3	Valine--tRNA ligase	Vars	sp|Q9Z1Q9|SYVC_MOUSE Valine--tRNA ligase OS=Mus musculus OX=10090 GN=Vars1 PE=1 SV=1;tr|G3UY93|G3UY93_MOUSE Valyl-tRNA synthetase (Fragment) OS=Mus musculus OX=10090 GN=Vars PE=1 SV=1	5	40	40	40	29	33	33	34	34	32	29	33	33	34	34	32	29	33	33	34	34	32	38.1	38.1	38.1	140.21	1263	1263;1278;230;125;130	3.54	127	40	51	89	78	0	202.3	By MS/MS	By MS/MS	By MS/MS	By MS/MS	By MS/MS	By MS/MS
Q03265;D3Z6F5;D6RJ16	Q03265;D3Z6F5	39;38;2	39;38;2	39;38;2	ATP synthase subunit alpha, mitochondrial;ATP synthase subunit alpha	Atp5a1	sp|Q03265|ATPA_MOUSE ATP synthase subunit alpha, mitochondrial OS=Mus musculus OX=10090 GN=Atp5f1a PE=1 SV=1;tr|D3Z6F5|D3Z6F5_MOUSE ATP synthase subunit alpha OS=Mus musculus OX=10090 GN=Atp5a1 PE=1 SV=1	3	39	39	39	31	33	36	34	33	36	31	33	36	34	33	36	31	33	36	34	33	36	70.5	70.5	70.5	59.752	553	553;503;89	3.39	237	83	112	94	144	0	323.31	By MS/MS	By MS/MS	By MS/MS	By MS/MS	By MS/MS	By MS/MS
Q62095;A0A087WQV7	Q62095	39;1	38;1	8;1	ATP-dependent RNA helicase DDX3Y	Ddx3y	sp|Q62095|DDX3Y_MOUSE ATP-dependent RNA helicase DDX3Y OS=Mus musculus OX=10090 GN=Ddx3y PE=1 SV=2	2	39	38	8	29	31	34	27	31	31	28	30	33	26	30	30	5	4	6	4	4	4	49.7	49.7	15.8	73.427	658	658;41	3.55	166	19	48	70	126	0	176.4	By MS/MS	By MS/MS	By MS/MS	By MS/MS	By MS/MS	By MS/MS
G3X922;D4AFX7;A0A1L1STR9;A0A087WRC9;A0A087WS25	G3X922;D4AFX7	39;39;3;2;2	39;39;3;2;2	39;39;3;2;2		Dnajc13	tr|G3X922|G3X922_MOUSE DnaJ heat shock protein family (Hsp40) member C13 OS=Mus musculus OX=10090 GN=Dnajc13 PE=1 SV=1;tr|D4AFX7|D4AFX7_MOUSE DnaJ heat shock protein family (Hsp40) member C13 OS=Mus musculus OX=10090 GN=Dnajc13 PE=1 SV=1	5	39	39	39	23	26	31	23	21	20	23	26	31	23	21	20	23	26	31	23	21	20	22.9	22.9	22.9	254.44	2243	2243;2248;96;174;184	3.71	66	21	51	34	59	0	128.21	By MS/MS	By MS/MS	By MS/MS	By MS/MS	By MS/MS	By MS/MS
E9Q852;Q9QZQ1;E9Q9C3;E9PYX7;F7C3I9;A0A668KLE6	E9Q852;Q9QZQ1;E9Q9C3;E9PYX7	39;38;37;30;11;4	39;38;37;30;11;4	34;33;32;25;11;4	Afadin	Mllt4	tr|E9Q852|E9Q852_MOUSE Afadin OS=Mus musculus OX=10090 GN=Afdn PE=1 SV=2;sp|Q9QZQ1|AFAD_MOUSE Afadin OS=Mus musculus OX=10090 GN=Afdn PE=1 SV=3;tr|E9Q9C3|E9Q9C3_MOUSE Afadin OS=Mus musculus OX=10090 GN=Afdn PE=1 SV=1;tr|E9PYX7|E9PYX7_MOUSE Afadin OS=Mus mu	6	39	39	34	30	23	36	16	18	16	30	23	36	16	18	16	27	21	32	14	16	14	27	27	24	204.52	1805	1805;1820;1827;1663;380;87	3.75	47	45	33	45	44	0	141.13	By MS/MS	By MS/MS	By MS/MS	By MS/MS	By MS/MS	By MS/MS
Q1HFZ0;H3BKN0;H3BJF3	Q1HFZ0;H3BKN0	39;36;3	39;36;3	39;36;3	tRNA (cytosine(34)-C(5))-methyltransferase	Nsun2	sp|Q1HFZ0|NSUN2_MOUSE RNA cytosine C(5)-methyltransferase NSUN2 OS=Mus musculus OX=10090 GN=Nsun2 PE=1 SV=2;tr|H3BKN0|H3BKN0_MOUSE NOL1/NOP2/Sun domain family member 2 OS=Mus musculus OX=10090 GN=Nsun2 PE=1 SV=1	3	39	39	39	31	31	33	33	34	35	31	31	33	33	34	35	31	31	33	33	34	35	64.2	64.2	64.2	85.451	757	757;722;72	3.24	201	60	87	65	103	0	323.31	By MS/MS	By MS/MS	By MS/MS	By MS/MS	By MS/MS	By MS/MS
E9Q3G8;A0A286YCP2;A0A286YE24;A0A286YCY7	E9Q3G8	39;8;7;1	39;8;7;1	39;8;7;1		Nup153	tr|E9Q3G8|E9Q3G8_MOUSE Nucleoporin 153 OS=Mus musculus OX=10090 GN=Nup153 PE=1 SV=1	4	39	39	39	30	28	36	27	30	29	30	28	36	27	30	29	30	28	36	27	30	29	41	41	41	152.01	1462	1462;256;303;203	2.98	144	27	68	63	29	0	323.31	By MS/MS	By MS/MS	By MS/MS	By MS/MS	By MS/MS	By MS/MS
Q9CZU3	Q9CZU3	39	39	39	Superkiller viralicidic activity 2-like 2	Skiv2l2	sp|Q9CZU3|MTREX_MOUSE Exosome RNA helicase MTR4 OS=Mus musculus OX=10090 GN=Mtrex PE=1 SV=1	1	39	39	39	25	29	32	32	33	28	25	29	32	32	33	28	25	29	32	32	33	28	39.6	39.6	39.6	117.64	1040	1040	3.39	115	41	74	63	55	0	199.14	By MS/MS	By MS/MS	By MS/MS	By MS/MS	By MS/MS	By MS/MS
A0A1D5RLL4;E9QLK7;E9PZA7;E9PWT1;F7CGG2;Q80YV3;D3YY11	A0A1D5RLL4;E9QLK7;E9PZA7;E9PWT1;F7CGG2;Q80YV3	39;38;38;38;35;25;2	39;38;38;38;35;25;2	39;38;38;38;35;25;2	Transformation/transcription domain-associated protein	Trrap	tr|A0A1D5RLL4|A0A1D5RLL4_MOUSE Transformation/transcription domain-associated protein OS=Mus musculus OX=10090 GN=Trrap PE=1 SV=1;tr|E9QLK7|E9QLK7_MOUSE Transformation/transcription domain-associated protein OS=Mus musculus OX=10090 GN=Trrap PE=1 SV=1;tr|E	7	39	39	39	30	27	26	16	23	21	30	27	26	16	23	21	30	27	26	16	23	21	13.6	13.6	13.6	437.35	3859	3859;3847;3829;3858;3587;2565;58	4.62	23	12	40	15	88	0	159.7	By MS/MS	By MS/MS	By MS/MS	By MS/MS	By MS/MS	By MS/MS
A2A654;E9Q6A7;A2A655;A2A653;A0A140LHY5;A2A652	A2A654;E9Q6A7;A2A655	38;37;37;5;2;1	38;37;37;5;2;1	38;37;37;5;2;1		Bptf	tr|A2A654|A2A654_MOUSE Bromodomain PHD finger transcription factor OS=Mus musculus OX=10090 GN=Bptf PE=1 SV=1;tr|E9Q6A7|E9Q6A7_MOUSE Bromodomain PHD finger transcription factor OS=Mus musculus OX=10090 GN=Bptf PE=1 SV=1;tr|A2A655|A2A655_MOUSE Bromodomain P	6	38	38	38	27	24	34	23	26	26	27	24	34	23	26	26	27	24	34	23	26	26	17.3	17.3	17.3	333.22	3036	3036;2921;2973;289;329;158	3.56	45	53	79	24	31	0	161.14	By MS/MS	By MS/MS	By MS/MS	By MS/MS	By MS/MS	By MS/MS
P80315;G5E839;G3UYW5;G3UXF3;G3UXG2	P80315;G5E839	38;35;6;2;2	38;35;6;2;2	38;35;6;2;2	T-complex protein 1 subunit delta	Cct4	sp|P80315|TCPD_MOUSE T-complex protein 1 subunit delta OS=Mus musculus OX=10090 GN=Cct4 PE=1 SV=3;tr|G5E839|G5E839_MOUSE T-complex protein 1 subunit delta OS=Mus musculus OX=10090 GN=Cct4 PE=1 SV=1	5	38	38	38	30	36	34	36	31	31	30	36	34	36	31	31	30	36	34	36	31	31	78.1	78.1	78.1	58.066	539	539;509;120;47;59	3.5	261	78	133	168	148	0	323.31	By MS/MS	By MS/MS	By MS/MS	By MS/MS	By MS/MS	By MS/MS
Q62167	Q62167	38	7	5	ATP-dependent RNA helicase DDX3X	Ddx3x	sp|Q62167|DDX3X_MOUSE ATP-dependent RNA helicase DDX3X OS=Mus musculus OX=10090 GN=Ddx3x PE=1 SV=3	1	38	7	5	29	32	35	29	34	34	5	5	7	6	7	7	4	3	5	4	5	5	53.3	19	14.7	73.101	662	662	3.06	32	4	2	15	12	0	39.779	By MS/MS	By MS/MS	By MS/MS	By MS/MS	By MS/MS	By MS/MS
Q8JZQ9;A0A0G2JG48	Q8JZQ9	38;5	38;5	38;5	Eukaryotic translation initiation factor 3 subunit B	Eif3b	sp|Q8JZQ9|EIF3B_MOUSE Eukaryotic translation initiation factor 3 subunit B OS=Mus musculus OX=10090 GN=Eif3b PE=1 SV=1	2	38	38	38	25	27	31	35	33	31	25	27	31	35	33	31	25	27	31	35	33	31	53.9	53.9	53.9	91.369	803	803;175	3.43	160	42	99	88	82	0	323.31	By MS/MS	By MS/MS	By MS/MS	By MS/MS	By MS/MS	By MS/MS
P17182;Q6PHC1;B0QZL1;B1ARR7;B1ARR6;A0A0N4SUW8	P17182;Q6PHC1	38;28;18;12;6;1	38;28;18;12;6;1	33;25;15;10;4;0	Alpha-enolase	Eno1	sp|P17182|ENOA_MOUSE Alpha-enolase OS=Mus musculus OX=10090 GN=Eno1 PE=1 SV=3;tr|Q6PHC1|Q6PHC1_MOUSE 2-phospho-D-glycerate hydro-lyase OS=Mus musculus OX=10090 GN=Eno1 PE=1 SV=1	6	38	38	33	32	36	34	35	32	32	32	36	34	35	32	32	27	31	29	30	27	27	85.3	85.3	73.5	47.14	434	434;366;221;119;67;37	3.58	778	785	777	613	530	0	323.31	By MS/MS	By MS/MS	By MS/MS	By MS/MS	By MS/MS	By MS/MS
Q6PCM1;A0A0U1RNV6	Q6PCM1;A0A0U1RNV6	38;25	38;25	37;25	Lysine-specific demethylase 3A	Kdm3a	sp|Q6PCM1|KDM3A_MOUSE Lysine-specific demethylase 3A OS=Mus musculus OX=10090 GN=Kdm3a PE=1 SV=1;tr|A0A0U1RNV6|A0A0U1RNV6_MOUSE Lysine-specific demethylase 3A (Fragment) OS=Mus musculus OX=10090 GN=Kdm3a PE=1 SV=1	2	38	38	37	30	22	34	26	32	28	30	22	34	26	32	28	29	21	33	25	31	27	44.7	44.7	43.8	147.85	1323	1323;834	3.68	84	42	41	60	70	0	263.33	By MS/MS	By MS/MS	By MS/MS	By MS/MS	By MS/MS	By MS/MS
P49717;A0A2R8VHP7;A0A2R8VKJ4	P49717	38;4;1	38;4;1	37;4;1	DNA replication licensing factor MCM4	Mcm4	sp|P49717|MCM4_MOUSE DNA replication licensing factor MCM4 OS=Mus musculus OX=10090 GN=Mcm4 PE=1 SV=1	3	38	38	37	32	34	35	30	32	31	32	34	35	30	32	31	31	33	34	29	31	30	54.8	54.8	53.9	96.735	862	862;220;86	3.69	207	21	47	110	179	0	311.49	By MS/MS	By MS/MS	By MS/MS	By MS/MS	By MS/MS	By MS/MS
Q91YR7;B7ZCS1	Q91YR7	38;1	38;1	38;1	Pre-mRNA-processing factor 6	Prpf6	sp|Q91YR7|PRP6_MOUSE Pre-mRNA-processing factor 6 OS=Mus musculus OX=10090 GN=Prpf6 PE=1 SV=1	2	38	38	38	33	29	34	26	31	27	33	29	34	26	31	27	33	29	34	26	31	27	47.7	47.7	47.7	106.72	941	941;54	3.37	130	45	42	61	76	0	219.91	By MS/MS	By MS/MS	By MS/MS	By MS/MS	By MS/MS	By MS/MS
P11983;F2Z483;A0A3B2WDE2	P11983	38;9;2	38;9;2	38;9;2	T-complex protein 1 subunit alpha	Tcp1	sp|P11983|TCPA_MOUSE T-complex protein 1 subunit alpha OS=Mus musculus OX=10090 GN=Tcp1 PE=1 SV=3	3	38	38	38	31	36	33	37	35	34	31	36	33	37	35	34	31	36	33	37	35	34	75	75	75	60.448	556	556;103;54	3.49	264	69	114	119	180	0	323.31	By MS/MS	By MS/MS	By MS/MS	By MS/MS	By MS/MS	By MS/MS
Q64511;F6U5K2;F6XX57	Q64511	38;4;3	23;3;2	23;3;2	DNA topoisomerase 2-beta	Top2b	sp|Q64511|TOP2B_MOUSE DNA topoisomerase 2-beta OS=Mus musculus OX=10090 GN=Top2b PE=1 SV=2	3	38	23	23	30	26	33	18	21	18	16	13	20	6	7	4	16	13	20	6	7	4	25.6	17.9	17.9	181.91	1612	1612;230;348	4.52	12		21	21	29	0	74.546	By MS/MS	By MS/MS	By MS/MS	By MS/MS	By MS/MS	By MS/MS
P70399;A0A5H1ZRL7;A2AU90;F6QNC8;F6S5E4;F6ZRL3;F6VCK5	P70399;A0A5H1ZRL7;A2AU90	38;36;19;6;3;2;1	38;36;19;6;3;2;1	38;36;19;6;3;2;1	Tumor suppressor p53-binding protein 1	Tp53bp1;Trp53bp1	sp|P70399|TP53B_MOUSE TP53-binding protein 1 OS=Mus musculus OX=10090 GN=Tp53bp1 PE=1 SV=3;tr|A0A5H1ZRL7|A0A5H1ZRL7_MOUSE Transformation-related protein 53-binding protein 1 OS=Mus musculus OX=10090 GN=Trp53bp1 PE=1 SV=1;tr|A2AU90|A2AU90_MOUSE Transformati	7	38	38	38	22	16	27	23	29	23	22	16	27	23	29	23	22	16	27	23	29	23	37.8	37.8	37.8	212.73	1969	1969;1919;1018;190;81;166;59	3.44	43	49	46	28	22	0	291.62	By MS/MS	By MS/MS	By MS/MS	By MS/MS	By MS/MS	By MS/MS
E9Q2W9	E9Q2W9	37	2	2		Actn4	tr|E9Q2W9|E9Q2W9_MOUSE Alpha-actinin-4 (Fragment) OS=Mus musculus OX=10090 GN=Actn4 PE=1 SV=1	1	37	2	2	24	34	32	33	27	25	2	2	2	2	2	2	2	2	2	2	2	2	70.5	6.6	6.6	59.897	518	518	3.93	14		16	16	11	0	41.888	By MS/MS	By MS/MS	By MS/MS	By MS/MS	By MS/MS	By MS/MS
P80316;E0CZA1	P80316	37;9	37;9	37;9	T-complex protein 1 subunit epsilon	Cct5	sp|P80316|TCPE_MOUSE T-complex protein 1 subunit epsilon OS=Mus musculus OX=10090 GN=Cct5 PE=1 SV=1	2	37	37	37	31	34	32	30	37	34	31	34	32	30	37	34	31	34	32	30	37	34	71	71	71	59.623	541	541;199	3.69	241	74	118	137	209	0	323.31	By MS/MS	By MS/MS	By MS/MS	By MS/MS	By MS/MS	By MS/MS
P42932;H3BL49;H3BJB6;H3BLL1;H3BKG2;H3BKR8	P42932;H3BL49	37;32;17;8;8;2	37;32;17;8;8;2	37;32;17;8;8;2	T-complex protein 1 subunit theta	Cct8	sp|P42932|TCPQ_MOUSE T-complex protein 1 subunit theta OS=Mus musculus OX=10090 GN=Cct8 PE=1 SV=3;tr|H3BL49|H3BL49_MOUSE CCT-theta OS=Mus musculus OX=10090 GN=Cct8 PE=1 SV=1	6	37	37	37	31	34	32	34	35	35	31	34	32	34	35	35	31	34	32	34	35	35	66.6	66.6	66.6	59.555	548	548;489;239;132;158;71	3.39	259	89	119	104	159	0	323.31	By MS/MS	By MS/MS	By MS/MS	By MS/MS	By MS/MS	By MS/MS
Q9ERK4;E9Q1T9;F6ZEW4;E9QAX7;F7D1H9	Q9ERK4;E9Q1T9;F6ZEW4	37;34;25;16;1	37;34;25;16;1	37;34;25;16;1	Exportin-2	Cse1l	sp|Q9ERK4|XPO2_MOUSE Exportin-2 OS=Mus musculus OX=10090 GN=Cse1l PE=1 SV=1;tr|E9Q1T9|E9Q1T9_MOUSE Chromosome segregation 1-like protein OS=Mus musculus OX=10090 GN=Cse1l PE=1 SV=1;tr|F6ZEW4|F6ZEW4_MOUSE Exportin-2 (Fragment) OS=Mus musculus OX=10090 GN=Cs	5	37	37	37	23	33	33	33	27	26	23	33	33	33	27	26	23	33	33	33	27	26	43	43	43	110.45	971	971;915;658;415;74	3.66	187	78	132	133	138	0	323.31	By MS/MS	By MS/MS	By MS/MS	By MS/MS	By MS/MS	By MS/MS
Q501J6	Q501J6	37	26	1	Probable ATP-dependent RNA helicase DDX17	Ddx17	sp|Q501J6|DDX17_MOUSE Probable ATP-dependent RNA helicase DDX17 OS=Mus musculus OX=10090 GN=Ddx17 PE=1 SV=1	1	37	26	1	31	32	34	30	32	32	21	22	24	20	22	21	0	0	1	1	0	0	47.2	38.2	2.6	72.399	650	650	3.75	98	10	49	68	80	0	129.11	By MS/MS	By MS/MS	By MS/MS	By MS/MS	By MS/MS	By MS/MS
P10126;D3YZ68;D3Z3I8	P10126;D3YZ68	37;20;14	37;20;14	21;13;7	Elongation factor 1-alpha 1	Eef1a1	sp|P10126|EF1A1_MOUSE Elongation factor 1-alpha 1 OS=Mus musculus OX=10090 GN=Eef1a1 PE=1 SV=3;tr|D3YZ68|D3YZ68_MOUSE Elongation factor 1-alpha 1 (Fragment) OS=Mus musculus OX=10090 GN=Eef1a1 PE=1 SV=1	3	37	37	21	31	36	35	32	32	32	31	36	35	32	32	32	17	20	20	17	17	17	73.6	73.6	46.5	50.113	462	462;249;186	3.67	605	158	304	386	477	0	323.31	By MS/MS	By MS/MS	By MS/MS	By MS/MS	By MS/MS	By MS/MS
G3XA17;F7CBP1;F6TW20;F6UU81	G3XA17;F7CBP1	37;35;3;1	37;35;3;1	3;3;0;0		Eif4g2	tr|G3XA17|G3XA17_MOUSE Eukaryotic translation initiation factor 4 gamma 2 OS=Mus musculus OX=10090 GN=Eif4g2 PE=1 SV=1;tr|F7CBP1|F7CBP1_MOUSE Eukaryotic translation initiation factor 4 gamma 2 OS=Mus musculus OX=10090 GN=Eif4g2 PE=1 SV=1	4	37	37	3	27	24	32	31	28	32	27	24	32	31	28	32	2	0	2	2	1	3	47.5	47.5	3.2	102.1	906	906;868;161;158	3.55	107	44	23	62	80	0	210.88	By MS/MS	By MS/MS	By MS/MS	By MS/MS	By MS/MS	By MS/MS
Q69ZR9;A0A286YDQ5	Q69ZR9	37;3	37;3	37;3	Protein FAM208A	Fam208a	sp|Q69ZR9|TASOR_MOUSE Protein TASOR OS=Mus musculus OX=10090 GN=Tasor PE=1 SV=2	2	37	37	37	28	24	24	22	27	25	28	24	24	22	27	25	28	24	24	22	27	25	26.9	26.9	26.9	181.39	1610	1610;293	4.1	41	15	46	68	46	0	135.73	By MS/MS	By MS/MS	By MS/MS	By MS/MS	By MS/MS	By MS/MS
Q99MN1;Q8R2P8	Q99MN1;Q8R2P8	37;36	37;36	37;36	Lysine--tRNA ligase	Kars	sp|Q99MN1|SYK_MOUSE Lysine--tRNA ligase OS=Mus musculus OX=10090 GN=Kars1 PE=1 SV=1;tr|Q8R2P8|Q8R2P8_MOUSE Lysine--tRNA ligase OS=Mus musculus OX=10090 GN=Kars PE=1 SV=1	2	37	37	37	28	30	29	33	32	34	28	30	29	33	32	34	28	30	29	33	32	34	63	63	63	67.839	595	595;624	3.41	178	44	52	89	107	0	323.31	By MS/MS	By MS/MS	By MS/MS	By MS/MS	By MS/MS	By MS/MS
P37913;Q3U4X8;V9GWZ4;E9PV36;D3YUW4	P37913;Q3U4X8	37;36;12;9;7	37;36;12;9;7	37;36;12;9;7	DNA ligase 1;DNA ligase	Lig1	sp|P37913|DNLI1_MOUSE DNA ligase 1 OS=Mus musculus OX=10090 GN=Lig1 PE=1 SV=2;tr|Q3U4X8|Q3U4X8_MOUSE DNA ligase OS=Mus musculus OX=10090 GN=Lig1 PE=1 SV=1	5	37	37	37	29	31	33	27	30	25	29	31	33	27	30	25	29	31	33	27	30	25	46.5	46.5	46.5	102.29	916	916;932;313;270;225	3.5	133	61	53	81	86	0	207.79	By MS/MS	By MS/MS	By MS/MS	By MS/MS	By MS/MS	By MS/MS
P97310;A0A0N4SVY2	P97310	37;2	37;2	37;2	DNA replication licensing factor MCM2	Mcm2	sp|P97310|MCM2_MOUSE DNA replication licensing factor MCM2 OS=Mus musculus OX=10090 GN=Mcm2 PE=1 SV=3	2	37	37	37	30	30	34	29	27	25	30	30	34	29	27	25	30	30	34	29	27	25	47.7	47.7	47.7	102.08	904	904;90	3.35	150	54	81	62	82	0	323.31	By MS/MS	By MS/MS	By MS/MS	By MS/MS	By MS/MS	By MS/MS
Q8K224;A2BH46;E9Q498	Q8K224	37;5;2	37;5;2	37;5;2	N-acetyltransferase 10	Nat10	sp|Q8K224|NAT10_MOUSE RNA cytidine acetyltransferase OS=Mus musculus OX=10090 GN=Nat10 PE=1 SV=1	3	37	37	37	26	33	31	32	24	22	26	33	31	32	24	22	26	33	31	32	24	22	47.3	47.3	47.3	115.42	1024	1024;186;44	3.31	127	47	52	36	78	0	267.38	By MS/MS	By MS/MS	By MS/MS	By MS/MS	By MS/MS	By MS/MS
P46935;A0A571BDN7;A0A571BEP7;Q3V335;V9GWV8;V9GXK3;V9GXS6;A0A494BB14;A0A494BAL4;A0A286YDV4	P46935;A0A571BDN7	37;27;13;10;9;5;1;1;1;1	37;27;13;10;9;5;1;1;1;1	35;26;12;9;8;4;1;0;0;0	E3 ubiquitin-protein ligase NEDD4	Nedd4	sp|P46935|NEDD4_MOUSE E3 ubiquitin-protein ligase NEDD4 OS=Mus musculus OX=10090 GN=Nedd4 PE=1 SV=3;tr|A0A571BDN7|A0A571BDN7_MOUSE HECT-type E3 ubiquitin transferase OS=Mus musculus OX=10090 GN=Nedd4 PE=1 SV=1	10	37	37	35	29	33	35	34	30	29	29	33	35	34	30	29	27	31	33	32	28	27	46.4	46.4	44.2	102.71	887	887;1136;496;305;196;195;30;37;94;113	3.43	159	36	76	96	81	0	252.41	By MS/MS	By MS/MS	By MS/MS	By MS/MS	By MS/MS	By MS/MS
A0A1B0GSX7;Q6PFD9;B2RQL0;A0A140T8J8;A0A1B0GRB5;A0A1B0GRA7;A0A1B0GS62	A0A1B0GSX7;Q6PFD9;B2RQL0;A0A140T8J8	37;36;20;20;13;13;2	37;36;20;20;13;13;2	37;36;20;20;13;13;2	Nuclear pore complex protein Nup98-Nup96;Nuclear pore complex protein Nup98;Nuclear pore complex protein Nup96	Nup98	tr|A0A1B0GSX7|A0A1B0GSX7_MOUSE Nuclear pore complex protein Nup96 OS=Mus musculus OX=10090 GN=Nup98 PE=1 SV=1;sp|Q6PFD9|NUP98_MOUSE Nuclear pore complex protein Nup98-Nup96 OS=Mus musculus OX=10090 GN=Nup98 PE=1 SV=2;tr|B2RQL0|B2RQL0_MOUSE Nuclear pore com	7	37	37	37	29	34	30	34	32	30	29	34	30	34	32	30	29	34	30	34	32	30	28.9	28.9	28.9	197.31	1816	1816;1816;1170;1187;967;984;230	3.59	120	50	70	58	96	0	295.21	By MS/MS	By MS/MS	By MS/MS	By MS/MS	By MS/MS	By MS/MS
P48725;A0A1W2P737;F8VPV0;A0A1W2P8A6	P48725;A0A1W2P737;F8VPV0	37;37;37;1	37;37;37;1	37;37;37;1	Pericentrin	Pcnt	sp|P48725|PCNT_MOUSE Pericentrin OS=Mus musculus OX=10090 GN=Pcnt PE=1 SV=2;tr|A0A1W2P737|A0A1W2P737_MOUSE Pericentrin OS=Mus musculus OX=10090 GN=Pcnt PE=1 SV=1;tr|F8VPV0|F8VPV0_MOUSE Pericentrin OS=Mus musculus OX=10090 GN=Pcnt PE=1 SV=1	4	37	37	37	29	19	26	29	28	27	29	19	26	29	28	27	29	19	26	29	28	27	16.7	16.7	16.7	329.46	2898	2898;2898;2916;156	3.92	33	23	83	61	22	0	145	By MS/MS	By MS/MS	By MS/MS	By MS/MS	By MS/MS	By MS/MS
Q921M3	Q921M3	37	37	37	Splicing factor 3B subunit 3	Sf3b3	sp|Q921M3|SF3B3_MOUSE Splicing factor 3B subunit 3 OS=Mus musculus OX=10090 GN=Sf3b3 PE=1 SV=1	1	37	37	37	23	32	32	29	20	21	23	32	32	29	20	21	23	32	32	29	20	21	34.9	34.9	34.9	135.55	1217	1217	3.34	123	39	63	58	61	0	323.31	By MS/MS	By MS/MS	By MS/MS	By MS/MS	By MS/MS	By MS/MS
P40142;A0A286YE28;E0CY51	P40142;A0A286YE28	37;29;1	37;29;1	37;29;1	Transketolase	Tkt	sp|P40142|TKT_MOUSE Transketolase OS=Mus musculus OX=10090 GN=Tkt PE=1 SV=1;tr|A0A286YE28|A0A286YE28_MOUSE Transketolase (Fragment) OS=Mus musculus OX=10090 GN=Tkt PE=1 SV=1	3	37	37	37	29	35	33	29	30	30	29	35	33	29	30	30	29	35	33	29	30	30	68.5	68.5	68.5	67.63	623	623;502;42	3.41	224	64	133	147	99	0	323.31	By MS/MS	By MS/MS	By MS/MS	By MS/MS	By MS/MS	By MS/MS
Q9CQN1	Q9CQN1	37	37	37	Heat shock protein 75 kDa, mitochondrial	Trap1	sp|Q9CQN1|TRAP1_MOUSE Heat shock protein 75 kDa, mitochondrial OS=Mus musculus OX=10090 GN=Trap1 PE=1 SV=1	1	37	37	37	28	30	29	26	28	28	28	30	29	26	28	28	28	30	29	26	28	28	59.5	59.5	59.5	80.208	706	706	3.4	135	18	71	69	68	0	241.3	By MS/MS	By MS/MS	By MS/MS	By MS/MS	By MS/MS	By MS/MS
Q9Z1F9;H3BLR3;H3BLM2;H3BJQ2;A2BH29	Q9Z1F9	37;9;8;2;1	37;9;8;2;1	37;9;8;2;1	SUMO-activating enzyme subunit 2	Uba2	sp|Q9Z1F9|SAE2_MOUSE SUMO-activating enzyme subunit 2 OS=Mus musculus OX=10090 GN=Uba2 PE=1 SV=1	5	37	37	37	29	31	34	32	27	25	29	31	34	32	27	25	29	31	34	32	27	25	63.2	63.2	63.2	70.568	638	638;148;132;69;119	3.51	183	67	75	112	116	0	323.31	By MS/MS	By MS/MS	By MS/MS	By MS/MS	By MS/MS	By MS/MS
B1AWL2;B1AWL4;B1AWL5;B1AWL3	B1AWL2;B1AWL4;B1AWL5	37;22;22;1	37;22;22;1	37;22;22;1		Zfp462	sp|B1AWL2|ZN462_MOUSE Zinc finger protein 462 OS=Mus musculus OX=10090 GN=Znf462 PE=1 SV=1;tr|B1AWL4|B1AWL4_MOUSE Zinc finger protein 462 OS=Mus musculus OX=10090 GN=Zfp462 PE=1 SV=1;tr|B1AWL5|B1AWL5_MOUSE Zinc finger protein 462 OS=Mus musculus OX=10090 G	4	37	37	37	29	21	28	27	30	28	29	21	28	27	30	28	29	21	28	27	30	28	18.9	18.9	18.9	282.71	2495	2495;1407;1408;93	4.08	31	48	44	42	58	0	122.95	By MS/MS	By MS/MS	By MS/MS	By MS/MS	By MS/MS	By MS/MS
Q99KI0;A0A2R8W744;A0A2R8VJW0;A0A2R8VHM8	Q99KI0	36;4;3;2	36;4;3;2	36;4;3;2	Aconitate hydratase, mitochondrial	Aco2	sp|Q99KI0|ACON_MOUSE Aconitate hydratase, mitochondrial OS=Mus musculus OX=10090 GN=Aco2 PE=1 SV=1	4	36	36	36	32	32	33	30	33	33	32	32	33	30	33	33	32	32	33	30	33	33	52.1	52.1	52.1	85.462	780	780;194;62;58	3.65	145	20	115	98	96	0	323.31	By MS/MS	By MS/MS	By MS/MS	By MS/MS	By MS/MS	By MS/MS
Q99NH0;E9Q804;E9QKG6;A0A0G2JDZ9;A0A1W2P6X1	Q99NH0;E9Q804;E9QKG6;A0A0G2JDZ9;A0A1W2P6X1	36;36;35;35;27	36;36;35;35;27	22;22;21;21;13	Ankyrin repeat domain-containing protein 17	Ankrd17	sp|Q99NH0|ANR17_MOUSE Ankyrin repeat domain-containing protein 17 OS=Mus musculus OX=10090 GN=Ankrd17 PE=1 SV=2;tr|E9Q804|E9Q804_MOUSE Ankyrin repeat domain-containing protein 17 OS=Mus musculus OX=10090 GN=Ankrd17 PE=1 SV=3;tr|E9QKG6|E9QKG6_MOUSE Ankyrin	5	36	36	22	29	25	29	27	29	31	29	25	29	27	29	31	16	15	18	17	16	20	20.2	20.2	13.7	274.21	2603	2603;2602;2352;2494;1600	3.78	63	45	52	85	43	0	196.86	By MS/MS	By MS/MS	By MS/MS	By MS/MS	By MS/MS	By MS/MS
Q8K298;A0A1L1SS34	Q8K298	36;6	36;6	36;6	Actin-binding protein anillin	Anln	sp|Q8K298|ANLN_MOUSE Anillin OS=Mus musculus OX=10090 GN=Anln PE=1 SV=2	2	36	36	36	30	31	31	30	34	34	30	31	31	30	34	34	30	31	31	30	34	34	48.9	48.9	48.9	122.79	1121	1121;239	3.29	138	46	53	89	52	0	261.89	By MS/MS	By MS/MS	By MS/MS	By MS/MS	By MS/MS	By MS/MS
Q8VDN2	Q8VDN2	36	36	26	Sodium/potassium-transporting ATPase subunit alpha-1	Atp1a1	sp|Q8VDN2|AT1A1_MOUSE Sodium/potassium-transporting ATPase subunit alpha-1 OS=Mus musculus OX=10090 GN=Atp1a1 PE=1 SV=1	1	36	36	26	31	34	31	29	28	25	31	34	31	29	28	25	22	25	23	21	20	17	35.7	35.7	29.1	112.98	1023	1023	3.48	149	74	78	124	69	0	323.31	By MS/MS	By MS/MS	By MS/MS	By MS/MS	By MS/MS	By MS/MS
Q9Z277	Q9Z277	36	36	36	Tyrosine-protein kinase BAZ1B	Baz1b	sp|Q9Z277|BAZ1B_MOUSE Tyrosine-protein kinase BAZ1B OS=Mus musculus OX=10090 GN=Baz1b PE=1 SV=2	1	36	36	36	27	29	32	26	29	27	27	29	32	26	29	27	27	29	32	26	29	27	29.3	29.3	29.3	170.65	1479	1479	3.87	74	38	91	84	65	0	241.74	By MS/MS	By MS/MS	By MS/MS	By MS/MS	By MS/MS	By MS/MS
Q8CIE6;F8WHL2;F6XJN3	Q8CIE6;F8WHL2	36;36;2	36;36;2	36;36;2	Coatomer subunit alpha;Xenin;Proxenin;Coatomer subunit alpha	Copa	sp|Q8CIE6|COPA_MOUSE Coatomer subunit alpha OS=Mus musculus OX=10090 GN=Copa PE=1 SV=2;tr|F8WHL2|F8WHL2_MOUSE Coatomer subunit alpha OS=Mus musculus OX=10090 GN=Copa PE=1 SV=1	3	36	36	36	19	30	29	30	23	21	19	30	29	30	23	21	19	30	29	30	23	21	34.1	34.1	34.1	138.43	1224	1224;1233;143	3.55	98	39	38	19	92	0	155.98	By MS/MS	By MS/MS	By MS/MS	By MS/MS	By MS/MS	By MS/MS
P60843	P60843	36	36	21	Eukaryotic initiation factor 4A-I	Eif4a1	sp|P60843|IF4A1_MOUSE Eukaryotic initiation factor 4A-I OS=Mus musculus OX=10090 GN=Eif4a1 PE=1 SV=1	1	36	36	21	23	33	30	35	33	29	23	33	30	35	33	29	13	18	17	20	19	17	79.6	79.6	56.2	46.153	406	406	3.54	370	93	192	214	238	0	323.31	By MS/MS	By MS/MS	By MS/MS	By MS/MS	By MS/MS	By MS/MS
Q3UHU8;Q9ESZ8;G3UYD0;G3UYJ6;G3UX27;G3UWV2;G3UYD7;G3UZU4;Q99NI3;G3UY14;G3UWP6	Q3UHU8;Q9ESZ8;G3UYD0	36;35;33;15;6;6;5;5;2;2;2	36;35;33;15;6;6;5;5;2;2;2	36;35;33;15;6;6;5;5;2;2;2	General transcription factor II-I	Gtf2i	tr|Q3UHU8|Q3UHU8_MOUSE General transcription factor II-I OS=Mus musculus OX=10090 GN=Gtf2i PE=1 SV=1;sp|Q9ESZ8|GTF2I_MOUSE General transcription factor II-I OS=Mus musculus OX=10090 GN=Gtf2i PE=1 SV=3;tr|G3UYD0|G3UYD0_MOUSE General transcription factor II-	11	36	36	36	32	30	35	27	29	29	32	30	35	27	29	29	32	30	35	27	29	29	47.9	47.9	47.9	108.35	962	962;998;913;437;167;169;150;159;936;79;86	3.89	95	44	55	123	81	0	182.52	By MS/MS	By MS/MS	By MS/MS	By MS/MS	By MS/MS	By MS/MS
F8VQJ3;P02468;F6SFQ3;F6TLW1	F8VQJ3;P02468	36;34;6;3	36;34;6;3	36;34;6;3	Laminin subunit gamma-1	Lamc1	tr|F8VQJ3|F8VQJ3_MOUSE Laminin subunit gamma-1 OS=Mus musculus OX=10090 GN=Lamc1 PE=1 SV=1;sp|P02468|LAMC1_MOUSE Laminin subunit gamma-1 OS=Mus musculus OX=10090 GN=Lamc1 PE=1 SV=2	4	36	36	36	25	27	26	31	29	25	25	27	26	31	29	25	25	27	26	31	29	25	26.3	26.3	26.3	177.19	1607	1607;1607;104;125	3.62	79	20	64	80	36	0	249.14	By MS/MS	By MS/MS	By MS/MS	By MS/MS	By MS/MS	By MS/MS
A2ARV4;A2ARV5;Q3V346	A2ARV4	36;8;1	36;8;1	36;8;1	Low-density lipoprotein receptor-related protein 2	Lrp2	sp|A2ARV4|LRP2_MOUSE Low-density lipoprotein receptor-related protein 2 OS=Mus musculus OX=10090 GN=Lrp2 PE=1 SV=1	3	36	36	36	21	24	33	19	20	18	21	24	33	19	20	18	21	24	33	19	20	18	11.2	11.2	11.2	519.2	4660	4660;1363;426	4.29	22	22	27	50	43	0	129.49	By MS/MS	By MS/MS	By MS/MS	By MS/MS	By MS/MS	By MS/MS
F7BJB9;A0A0J9YU83;A0A338P7B1;A0A0J9YUV3	F7BJB9;A0A0J9YU83	36;18;4;2	36;18;4;2	36;18;4;2		Morc3	sp|F7BJB9|MORC3_MOUSE MORC family CW-type zinc finger protein 3 OS=Mus musculus OX=10090 GN=Morc3 PE=1 SV=1;tr|A0A0J9YU83|A0A0J9YU83_MOUSE MORC family CW-type zinc finger protein 3 (Fragment) OS=Mus musculus OX=10090 GN=Morc3 PE=1 SV=2	4	36	36	36	29	29	29	22	31	26	29	29	29	22	31	26	29	29	29	22	31	26	49.5	49.5	49.5	106.52	942	942;397;58;92	3.56	95	52	49	36	82	0	222.79	By MS/MS	By MS/MS	By MS/MS	By MS/MS	By MS/MS	By MS/MS
Q80U93	Q80U93	36	36	31	Nuclear pore complex protein Nup214	Nup214	sp|Q80U93|NU214_MOUSE Nuclear pore complex protein Nup214 OS=Mus musculus OX=10090 GN=Nup214 PE=1 SV=2	1	36	36	31	29	23	29	26	30	29	29	23	29	26	30	29	26	21	26	23	26	24	28.4	28.4	22.9	212.98	2085	2085	3.31	88	94	65	50	38	0	269.42	By MS/MS	By MS/MS	By MS/MS	By MS/MS	By MS/MS	By MS/MS
P27773;F6Q404	P27773	36;6	36;6	35;6	Protein disulfide-isomerase A3	Pdia3	sp|P27773|PDIA3_MOUSE Protein disulfide-isomerase A3 OS=Mus musculus OX=10090 GN=Pdia3 PE=1 SV=2	2	36	36	35	32	34	35	34	35	32	32	34	35	34	35	32	31	34	34	33	34	31	66.1	66.1	63.2	56.678	505	505;124	3.52	299	66	80	127	225	0	323.31	By MS/MS	By MS/MS	By MS/MS	By MS/MS	By MS/MS	By MS/MS
O88685;A2AGN7;B7ZCF1	O88685;A2AGN7;B7ZCF1	36;34;31	36;34;31	15;15;10	26S protease regulatory subunit 6A	Psmc3	sp|O88685|PRS6A_MOUSE 26S proteasome regulatory subunit 6A OS=Mus musculus OX=10090 GN=Psmc3 PE=1 SV=2;tr|A2AGN7|A2AGN7_MOUSE 26S proteasome regulatory subunit 6A OS=Mus musculus OX=10090 GN=Psmc3 PE=1 SV=1;tr|B7ZCF1|B7ZCF1_MOUSE 26S proteasome regulatory	3	36	36	15	31	30	30	33	33	31	31	30	30	33	33	31	12	11	11	14	13	11	77.4	77.4	31.9	49.548	442	442;400;451	3.63	210	47	131	143	143	0	323.31	By MS/MS	By MS/MS	By MS/MS	By MS/MS	By MS/MS	By MS/MS
Q920B9;G3X956	Q920B9;G3X956	36;36	36;36	36;36	FACT complex subunit SPT16	Supt16h;Supt16	sp|Q920B9|SP16H_MOUSE FACT complex subunit SPT16 OS=Mus musculus OX=10090 GN=Supt16h PE=1 SV=2;tr|G3X956|G3X956_MOUSE FACT complex subunit OS=Mus musculus OX=10090 GN=Supt16 PE=1 SV=1	2	36	36	36	29	33	30	33	26	29	29	33	30	33	26	29	29	33	30	33	26	29	37.8	37.8	37.8	119.82	1047	1047;1047	3.52	138	19	130	118	49	0	243.17	By MS/MS	By MS/MS	By MS/MS	By MS/MS	By MS/MS	By MS/MS
Q61033	Q61033	36	36	24	Lamina-associated polypeptide 2, isoforms alpha/zeta	Tmpo	sp|Q61033|LAP2A_MOUSE Lamina-associated polypeptide 2, isoforms alpha/zeta OS=Mus musculus OX=10090 GN=Tmpo PE=1 SV=4	1	36	36	24	29	26	33	24	31	29	29	26	33	24	31	29	18	16	22	16	21	19	59.5	59.5	43.9	75.167	693	693	3.4	143	21	84	77	69	0	323.31	By MS/MS	By MS/MS	By MS/MS	By MS/MS	By MS/MS	By MS/MS
E9Q2H1;A0A2I3BQS6;Q80TP3	E9Q2H1;A0A2I3BQS6;Q80TP3	36;36;35	36;36;35	36;36;35	E3 ubiquitin-protein ligase UBR5	Ubr5	tr|E9Q2H1|E9Q2H1_MOUSE E3 ubiquitin-protein ligase UBR5 OS=Mus musculus OX=10090 GN=Ubr5 PE=1 SV=2;tr|A0A2I3BQS6|A0A2I3BQS6_MOUSE E3 ubiquitin-protein ligase UBR5 OS=Mus musculus OX=10090 GN=Ubr5 PE=1 SV=1;sp|Q80TP3|UBR5_MOUSE E3 ubiquitin-protein ligase U	3	36	36	36	27	21	30	26	29	25	27	21	30	26	29	25	27	21	30	26	29	25	15.9	15.9	15.9	308.32	2792	2792;2798;2792	4.05	48	23	27	85	47	0	195.13	By MS/MS	By MS/MS	By MS/MS	By MS/MS	By MS/MS	By MS/MS
Q64727;A0A286YDJ4	Q64727	36;2	36;2	36;2	Vinculin	Vcl	sp|Q64727|VINC_MOUSE Vinculin OS=Mus musculus OX=10090 GN=Vcl PE=1 SV=4	2	36	36	36	30	25	33	29	32	32	30	25	33	29	32	32	30	25	33	29	32	32	44.7	44.7	44.7	116.72	1066	1066;149	3.13	136	65	92	65	34	0	254.86	By MS/MS	By MS/MS	By MS/MS	By MS/MS	By MS/MS	By MS/MS
Q99LE6	Q99LE6	35	35	35	ATP-binding cassette sub-family F member 2	Abcf2	sp|Q99LE6|ABCF2_MOUSE ATP-binding cassette sub-family F member 2 OS=Mus musculus OX=10090 GN=Abcf2 PE=1 SV=1	1	35	35	35	21	25	27	28	32	30	21	25	27	28	32	30	21	25	27	28	32	30	51.9	51.9	51.9	71.781	628	628	3.73	136	32	71	82	119	0	134.94	By MS/MS	By MS/MS	By MS/MS	By MS/MS	By MS/MS	By MS/MS
F8WIT2;P14824	F8WIT2;P14824	35;34	35;34	34;33	Annexin;Annexin A6	Anxa6	tr|F8WIT2|F8WIT2_MOUSE Annexin OS=Mus musculus OX=10090 GN=Anxa6 PE=1 SV=1;sp|P14824|ANXA6_MOUSE Annexin A6 OS=Mus musculus OX=10090 GN=Anxa6 PE=1 SV=3	2	35	35	34	20	24	30	29	28	23	20	24	30	29	28	23	19	23	29	28	27	22	54.1	54.1	53.1	75.288	667	667;673	3.98	106	19	28	86	121	0	191.24	By MS/MS	By MS/MS	By MS/MS	By MS/MS	By MS/MS	By MS/MS
P80314;A0A1W2P7B7;A0A1W2P6Q3;A0A1W2P828;A0A1W2P871;A0A1W2P8B6	P80314;A0A1W2P7B7	35;18;9;7;6;5	35;18;9;7;6;5	35;18;9;7;6;5	T-complex protein 1 subunit beta	Cct2	sp|P80314|TCPB_MOUSE T-complex protein 1 subunit beta OS=Mus musculus OX=10090 GN=Cct2 PE=1 SV=4;tr|A0A1W2P7B7|A0A1W2P7B7_MOUSE T-complex protein 1 subunit beta (Fragment) OS=Mus musculus OX=10090 GN=Cct2 PE=1 SV=1	6	35	35	35	27	31	30	28	32	28	27	31	30	28	32	28	27	31	30	28	32	28	77.2	77.2	77.2	57.477	535	535;217;181;85;64;115	3.47	244	118	91	81	193	0	323.31	By MS/MS	By MS/MS	By MS/MS	By MS/MS	By MS/MS	By MS/MS
Q6RT24;E9QKK1;A0A0G2JG58	Q6RT24;E9QKK1	35;33;3	35;33;3	35;33;3	Centromere-associated protein E;Kinesin-like protein	Cenpe	sp|Q6RT24|CENPE_MOUSE Centromere-associated protein E OS=Mus musculus OX=10090 GN=Cenpe PE=1 SV=1;tr|E9QKK1|E9QKK1_MOUSE Centromere-associated protein E OS=Mus musculus OX=10090 GN=Cenpe PE=1 SV=1	3	35	35	35	17	11	21	15	25	20	17	11	21	15	25	20	17	11	21	15	25	20	17.7	17.7	17.7	286.52	2474	2474;2471;194	3.73	15	42	29	20	17	0	101.91	By MS/MS	By MS/MS	By MS/MS	By MS/MS	By MS/MS	By MS/MS
Q91W50;Q8JZN2;A0A0G2JF72;A0A0G2JE62;A0A0G2JDJ7	Q91W50;Q8JZN2;A0A0G2JF72	35;33;30;4;3	35;33;30;4;3	35;33;30;4;3	Cold shock domain-containing protein E1	Csde1	sp|Q91W50|CSDE1_MOUSE Cold shock domain-containing protein E1 OS=Mus musculus OX=10090 GN=Csde1 PE=1 SV=1;tr|Q8JZN2|Q8JZN2_MOUSE Cold shock domain-containing protein E1 OS=Mus musculus OX=10090 GN=Csde1 PE=1 SV=1;tr|A0A0G2JF72|A0A0G2JF72_MOUSE Cold shock d	5	35	35	35	24	22	25	28	35	31	24	22	25	28	35	31	24	22	25	28	35	31	49.5	49.5	49.5	88.79	798	798;767;668;151;112	3.24	134	34	71	68	49	0	290.57	By MS/MS	By MS/MS	By MS/MS	By MS/MS	By MS/MS	By MS/MS
Q8C9B9;A0A0R4J0L7	Q8C9B9;A0A0R4J0L7	35;18	35;18	35;18	Death-inducer obliterator 1	Dido1	sp|Q8C9B9|DIDO1_MOUSE Death-inducer obliterator 1 OS=Mus musculus OX=10090 GN=Dido1 PE=1 SV=4;tr|A0A0R4J0L7|A0A0R4J0L7_MOUSE Death-inducer obliterator 1 OS=Mus musculus OX=10090 GN=Dido1 PE=1 SV=1	2	35	35	35	30	28	32	20	24	23	30	28	32	20	24	23	30	28	32	20	24	23	19.9	19.9	19.9	247.17	2256	2256;643	3.94	55	17	62	70	48	0	173.49	By MS/MS	By MS/MS	By MS/MS	By MS/MS	By MS/MS	By MS/MS
Q62448	Q62448	35	1	1	Eukaryotic translation initiation factor 4 gamma 2	Eif4g2	sp|Q62448|IF4G2_MOUSE Eukaryotic translation initiation factor 4 gamma 2 OS=Mus musculus OX=10090 GN=Eif4g2 PE=1 SV=2	1	35	1	1	26	25	31	30	28	30	1	1	1	1	1	1	1	1	1	1	1	1	47.1	1.3	1.3	102.1	906	906	3		12				0	5.1286	By MS/MS	By MS/MS	By MS/MS	By MS/MS	By MS/MS	By MS/MS
A2AJ72;Q3TIX6;A0A0A6YVV5;F7AM43;A2AJ71;A0A0A6YY39;A0A0A6YX76;F6W2V3	A2AJ72;Q3TIX6	35;35;12;10;7;7;4;1	35;35;12;10;7;7;4;1	35;35;12;10;7;7;4;1		Fubp3	tr|A2AJ72|A2AJ72_MOUSE Far upstream element (FUSE)-binding protein 3 OS=Mus musculus OX=10090 GN=Fubp3 PE=1 SV=1;tr|Q3TIX6|Q3TIX6_MOUSE Far upstream element (FUSE)-binding protein 3 OS=Mus musculus OX=10090 GN=Fubp3 PE=1 SV=1	8	35	35	35	29	31	34	28	31	30	29	31	34	28	31	30	29	31	34	28	31	30	66.3	66.3	66.3	61.447	569	569;575;191;264;97;123;83;104	3.39	158	47	44	110	74	0	244.97	By MS/MS	By MS/MS	By MS/MS	By MS/MS	By MS/MS	By MS/MS
Q80Y84	Q80Y84	35	35	31	Lysine-specific demethylase 5B	Kdm5b	sp|Q80Y84|KDM5B_MOUSE Lysine-specific demethylase 5B OS=Mus musculus OX=10090 GN=Kdm5b PE=1 SV=1	1	35	35	31	28	23	29	24	27	24	28	23	29	24	27	24	26	20	26	20	25	22	29.2	29.2	26.2	175.55	1544	1544	3.74	60	29	43	49	50	0	176.12	By MS/MS	By MS/MS	By MS/MS	By MS/MS	By MS/MS	By MS/MS
Q587J6;G3UYN0;E9PZU6;E9PXD6	Q587J6;G3UYN0	35;35;6;5	35;35;6;5	35;35;6;5	LINE-1 type transposase domain-containing protein 1	L1td1	sp|Q587J6|LITD1_MOUSE LINE-1 type transposase domain-containing protein 1 OS=Mus musculus OX=10090 GN=L1td1 PE=2 SV=1;tr|G3UYN0|G3UYN0_MOUSE L1TD1 OS=Mus musculus OX=10090 GN=L1td1 PE=1 SV=1	4	35	35	35	33	32	31	32	35	35	33	32	31	32	35	35	33	32	31	32	35	35	43.6	43.6	43.6	88.188	782	782;848;147;119	3.44	196	56	84	109	111	0	292.47	By MS/MS	By MS/MS	By MS/MS	By MS/MS	By MS/MS	By MS/MS
Q68FL6;E9QB02;F6W0G8	Q68FL6;E9QB02	35;35;7	35;35;7	35;35;7	Methionine--tRNA ligase, cytoplasmic	Mars	sp|Q68FL6|SYMC_MOUSE Methionine--tRNA ligase, cytoplasmic OS=Mus musculus OX=10090 GN=Mars1 PE=1 SV=1;tr|E9QB02|E9QB02_MOUSE Methionine--tRNA ligase, cytoplasmic OS=Mus musculus OX=10090 GN=Mars1 PE=1 SV=1	3	35	35	35	21	25	25	26	25	27	21	25	25	26	25	27	21	25	25	26	25	27	42.8	42.8	42.8	101.43	902	902;910;184	3.55	119	1	68	76	66	0	264.99	By MS/MS	By MS/MS	By MS/MS	By MS/MS	By MS/MS	By MS/MS
Q6P5B0	Q6P5B0	35	35	35	RRP12-like protein	Rrp12	sp|Q6P5B0|RRP12_MOUSE RRP12-like protein OS=Mus musculus OX=10090 GN=Rrp12 PE=1 SV=1	1	35	35	35	27	32	31	29	30	26	27	32	31	29	30	26	27	32	31	29	30	26	32.4	32.4	32.4	143.13	1295	1295	3.54	95	90	45	49	81	0	280.24	By MS/MS	By MS/MS	By MS/MS	By MS/MS	By MS/MS	By MS/MS
P97496;Q3UNN4;Q3UZD0	P97496;Q3UNN4	35;35;14	35;35;14	31;31;13	SWI/SNF complex subunit SMARCC1	Smarcc1	sp|P97496|SMRC1_MOUSE SWI/SNF complex subunit SMARCC1 OS=Mus musculus OX=10090 GN=Smarcc1 PE=1 SV=2;tr|Q3UNN4|Q3UNN4_MOUSE SWI/SNF complex subunit SMARCC1 OS=Mus musculus OX=10090 GN=Smarcc1 PE=1 SV=1	3	35	35	31	27	31	32	29	27	20	27	31	32	29	27	20	23	27	28	25	24	17	35.2	35.2	31.8	122.89	1104	1104;1098;485	3.27	134	89	55	54	72	0	323.31	By MS/MS	By MS/MS	By MS/MS	By MS/MS	By MS/MS	By MS/MS
Q64514;A0A087WRC0;Q05DJ9;A0A087WQR6;A0A087WP19	Q64514;A0A087WRC0	35;21;15;9;3	35;21;15;9;3	35;21;15;9;3	Tripeptidyl-peptidase 2	Tpp2	sp|Q64514|TPP2_MOUSE Tripeptidyl-peptidase 2 OS=Mus musculus OX=10090 GN=Tpp2 PE=1 SV=3;tr|A0A087WRC0|A0A087WRC0_MOUSE Tripeptidyl-peptidase 2 OS=Mus musculus OX=10090 GN=Tpp2 PE=1 SV=1	5	35	35	35	26	30	28	30	29	30	26	30	28	30	29	30	26	30	28	30	29	30	33.6	33.6	33.6	139.88	1262	1262;883;607;298;231	3.83	97	18	41	79	87	0	252.11	By MS/MS	By MS/MS	By MS/MS	By MS/MS	By MS/MS	By MS/MS
P68372;Q9D6F9;G3UZR1	P68372;Q9D6F9	35;28;4	35;28;4	6;5;0	Tubulin beta-4B chain;Tubulin beta-4A chain	Tubb4b;Tubb4a	sp|P68372|TBB4B_MOUSE Tubulin beta-4B chain OS=Mus musculus OX=10090 GN=Tubb4b PE=1 SV=1;sp|Q9D6F9|TBB4A_MOUSE Tubulin beta-4A chain OS=Mus musculus OX=10090 GN=Tubb4a PE=1 SV=3	3	35	35	6	32	34	33	34	31	31	32	34	33	34	31	31	6	6	6	6	6	6	85.4	85.4	22.2	49.83	445	445;444;66	3.43	572	138	193	258	365	0	323.31	By MS/MS	By MS/MS	By MS/MS	By MS/MS	By MS/MS	By MS/MS
P99024	P99024	35	8	6	Tubulin beta-5 chain	Tubb5	sp|P99024|TBB5_MOUSE Tubulin beta-5 chain OS=Mus musculus OX=10090 GN=Tubb5 PE=1 SV=1	1	35	8	6	31	33	33	33	31	31	7	7	8	7	8	8	5	5	6	5	6	6	81.3	29.7	20.5	49.67	444	444	3.62	155	66	178	66	120	0	297.28	By MS/MS	By MS/MS	By MS/MS	By MS/MS	By MS/MS	By MS/MS
P60710;E9Q1F2;E9Q5F4;G3UZ07;E9Q606;F8WGM8;E9Q2D1;F6WX90;E9Q3M9;V9GXQ2	P60710;E9Q1F2;E9Q5F4;G3UZ07	34;26;24;18;11;8;7;3;1;1	34;26;24;18;11;8;7;3;1;1	2;2;2;0;0;0;2;0;0;0	Actin, cytoplasmic 1;Actin, cytoplasmic 1, N-terminally processed	Actb;Actg1	sp|P60710|ACTB_MOUSE Actin, cytoplasmic 1 OS=Mus musculus OX=10090 GN=Actb PE=1 SV=1;tr|E9Q1F2|E9Q1F2_MOUSE Actin, cytoplasmic 1 OS=Mus musculus OX=10090 GN=Actb PE=1 SV=1;tr|E9Q5F4|E9Q5F4_MOUSE Actin, cytoplasmic 1 (Fragment) OS=Mus musculus OX=10090 GN=A	10	34	34	2	29	32	32	31	32	28	29	32	32	31	32	28	2	1	2	2	2	2	81.6	81.6	4.8	41.736	375	375;295;265;268;150;105;108;43;1175;156	3.53	735	742	824	550	426	0	323.31	By MS/MS	By MS/MS	By MS/MS	By MS/MS	By MS/MS	By MS/MS
P63260;G3UYG0;B1ATY1	P63260	34;13;13	2;2;2	2;2;2	Actin, cytoplasmic 2;Actin, cytoplasmic 2, N-terminally processed	Actg1	sp|P63260|ACTG_MOUSE Actin, cytoplasmic 2 OS=Mus musculus OX=10090 GN=Actg1 PE=1 SV=1	3	34	2	2	28	32	31	31	32	27	1	1	1	2	2	1	1	1	1	2	2	1	81.6	4.8	4.8	41.792	375	375;132;153	3.22	22	91	15	13	12	0	106.98	By MS/MS	By MS/MS	By MS/MS	By MS/MS	By MS/MS	By MS/MS
Q6A068;A0A1W2P7Z8;A0A1W2P7H4;A0A1W2P855;A0A1W2P6Q8	Q6A068;A0A1W2P7Z8;A0A1W2P7H4;A0A1W2P855;A0A1W2P6Q8	34;24;24;23;23	34;24;24;23;23	11;6;6;5;5	Cell division cycle 5-like protein	Cdc5l	sp|Q6A068|CDC5L_MOUSE Cell division cycle 5-like protein OS=Mus musculus OX=10090 GN=Cdc5l PE=1 SV=2;tr|A0A1W2P7Z8|A0A1W2P7Z8_MOUSE Predicted gene 9045 OS=Mus musculus OX=10090 GN=Gm9045 PE=3 SV=1;tr|A0A1W2P7H4|A0A1W2P7H4_MOUSE Predicted gene 9048 OS=Mus m	5	34	34	11	28	27	32	29	31	28	28	27	32	29	31	28	10	10	10	10	10	10	53.5	53.5	20.4	92.188	802	802;802;802;802;802	3.38	152	65	73	71	87	0	219.74	By MS/MS	By MS/MS	By MS/MS	By MS/MS	By MS/MS	By MS/MS
Q5NBX1;G3UWY3;G5E8P4;G3UZ73;F6RR81;F6ZEZ1;G3UWP1	Q5NBX1;G3UWY3;G5E8P4	34;34;32;11;9;4;4	34;34;32;11;9;4;4	34;34;32;11;9;4;4	Protein cordon-bleu	Cobl	sp|Q5NBX1|COBL_MOUSE Protein cordon-bleu OS=Mus musculus OX=10090 GN=Cobl PE=1 SV=1;tr|G3UWY3|G3UWY3_MOUSE Protein cordon-bleu OS=Mus musculus OX=10090 GN=Cobl PE=1 SV=1;tr|G5E8P4|G5E8P4_MOUSE Protein cordon-bleu OS=Mus musculus OX=10090 GN=Cobl PE=1 SV=1	7	34	34	34	28	27	32	22	22	22	28	27	32	22	22	22	28	27	32	22	22	22	35.9	35.9	35.9	143.86	1337	1337;1330;1312;410;216;159;208	3.62	69	28	57	52	44	0	170.11	By MS/MS	By MS/MS	By MS/MS	By MS/MS	By MS/MS	By MS/MS
Q9D5V5;E9PV12;G3X914;E9Q6Z0	Q9D5V5;E9PV12;G3X914;E9Q6Z0	34;34;34;28	34;34;34;28	34;34;34;28	Cullin-5	Cul5	sp|Q9D5V5|CUL5_MOUSE Cullin-5 OS=Mus musculus OX=10090 GN=Cul5 PE=1 SV=3;tr|E9PV12|E9PV12_MOUSE Cullin-5 OS=Mus musculus OX=10090 GN=Cul5 PE=1 SV=1;tr|G3X914|G3X914_MOUSE Cullin-5 OS=Mus musculus OX=10090 GN=Cul5 PE=1 SV=1;tr|E9Q6Z0|E9Q6Z0_MOUSE Cullin-5 O	4	34	34	34	23	26	25	20	21	26	23	26	25	20	21	26	23	26	25	20	21	26	48.2	48.2	48.2	90.973	780	780;828;855;651	3.61	60	15	53	29	44	0	154.73	By MS/MS	By MS/MS	By MS/MS	By MS/MS	By MS/MS	By MS/MS
Q569Z5;F8WHR6;A0A2R8VHK2	Q569Z5;F8WHR6	34;32;5	34;32;5	34;32;5	Probable ATP-dependent RNA helicase DDX46	Ddx46	sp|Q569Z5|DDX46_MOUSE Probable ATP-dependent RNA helicase DDX46 OS=Mus musculus OX=10090 GN=Ddx46 PE=1 SV=2;tr|F8WHR6|F8WHR6_MOUSE RNA helicase OS=Mus musculus OX=10090 GN=Ddx46 PE=1 SV=1	3	34	34	34	31	23	32	26	24	28	31	23	32	26	24	28	31	23	32	26	24	28	36.3	36.3	36.3	117.45	1032	1032;1028;144	3.48	115	52	73	75	63	0	179.11	By MS/MS	By MS/MS	By MS/MS	By MS/MS	By MS/MS	By MS/MS
Q61598;A0A1Y7VL99;A0A1Y7VLG4	Q61598;A0A1Y7VL99	34;18;7	34;18;7	27;13;6	Rab GDP dissociation inhibitor beta	Gdi2	sp|Q61598|GDIB_MOUSE Rab GDP dissociation inhibitor beta OS=Mus musculus OX=10090 GN=Gdi2 PE=1 SV=1;tr|A0A1Y7VL99|A0A1Y7VL99_MOUSE Rab GDP dissociation inhibitor (Fragment) OS=Mus musculus OX=10090 GN=Gdi2 PE=1 SV=1	3	34	34	27	24	30	28	30	28	28	24	30	28	30	28	28	17	23	22	23	21	21	76.6	76.6	61.3	50.537	445	445;318;104	3.98	192	21	79	156	215	0	323.31	By MS/MS	By MS/MS	By MS/MS	By MS/MS	By MS/MS	By MS/MS
O88477	O88477	34	34	31	Insulin-like growth factor 2 mRNA-binding protein 1	Igf2bp1	sp|O88477|IF2B1_MOUSE Insulin-like growth factor 2 mRNA-binding protein 1 OS=Mus musculus OX=10090 GN=Igf2bp1 PE=1 SV=1	1	34	34	31	30	29	31	31	30	32	30	29	31	31	30	32	29	28	29	29	29	30	55.3	55.3	51.1	63.45	577	577	3.36	251	43	92	123	132	0	323.31	By MS/MS	By MS/MS	By MS/MS	By MS/MS	By MS/MS	By MS/MS
Q6P9L6;A0A1L1SU97;A0A1L1SR51;A0A1L1SS78;A0A1L1SUV4;A0A1L1SR78;A0A1L1SS28;A0A1L1SVE8	Q6P9L6;A0A1L1SU97	34;17;7;6;4;1;1;1	34;17;7;6;4;1;1;1	34;17;7;6;4;1;1;1	Kinesin-like protein KIF15	Kif15	sp|Q6P9L6|KIF15_MOUSE Kinesin-like protein KIF15 OS=Mus musculus OX=10090 GN=Kif15 PE=1 SV=1;tr|A0A1L1SU97|A0A1L1SU97_MOUSE Kinesin-like protein KIF15 (Fragment) OS=Mus musculus OX=10090 GN=Kif15 PE=1 SV=1	8	34	34	34	19	18	27	23	23	23	19	18	27	23	23	23	19	18	27	23	23	23	29.9	29.9	29.9	160.12	1387	1387;711;202;188;291;73;120;137	3.84	44	16	62	62	26	0	219.05	By MS/MS	By MS/MS	By MS/MS	By MS/MS	By MS/MS	By MS/MS
Q61768;E9QAK5;A2ARD4	Q61768;E9QAK5	34;24;1	34;24;1	25;17;0	Kinesin-1 heavy chain;Kinesin-like protein	Kif5b	sp|Q61768|KINH_MOUSE Kinesin-1 heavy chain OS=Mus musculus OX=10090 GN=Kif5b PE=1 SV=3;tr|E9QAK5|E9QAK5_MOUSE Kinesin-like protein (Fragment) OS=Mus musculus OX=10090 GN=Kif5b PE=1 SV=1	3	34	34	25	27	25	28	20	31	29	27	25	28	20	31	29	21	20	22	16	24	23	45.2	45.2	33.5	109.55	963	963;619;243	3.28	99	68	43	54	44	0	304.82	By MS/MS	By MS/MS	By MS/MS	By MS/MS	By MS/MS	By MS/MS
Q9CPY7;A0A0G2JEM7	Q9CPY7	34;7	34;7	34;7	Cytosol aminopeptidase	Lap3	sp|Q9CPY7|AMPL_MOUSE Cytosol aminopeptidase OS=Mus musculus OX=10090 GN=Lap3 PE=1 SV=3	2	34	34	34	29	33	32	30	29	29	29	33	32	30	29	29	29	33	32	30	29	29	74.8	74.8	74.8	56.141	519	519;107	3.54	205	67	56	64	179	0	323.31	By MS/MS	By MS/MS	By MS/MS	By MS/MS	By MS/MS	By MS/MS
Q61881;D3Z6N3;D3Z2K9;D3Z0J6;D3Z335	Q61881	34;16;4;3;1	34;16;4;3;1	34;16;4;3;1	DNA replication licensing factor MCM7	Mcm7	sp|Q61881|MCM7_MOUSE DNA replication licensing factor MCM7 OS=Mus musculus OX=10090 GN=Mcm7 PE=1 SV=1	5	34	34	34	22	30	31	27	24	24	22	30	31	27	24	24	22	30	31	27	24	24	57.7	57.7	57.7	81.21	719	719;389;142;110;50	3.65	186	23	50	112	145	0	323.31	By MS/MS	By MS/MS	By MS/MS	By MS/MS	By MS/MS	By MS/MS
Q80UM3;G3X8Y3;A0A0A6YW80;A0A0A6YXF4;A0A0A6YX86	Q80UM3;G3X8Y3;A0A0A6YW80	34;34;32;7;7	34;34;32;7;7	31;31;30;6;6	N-alpha-acetyltransferase 15, NatA auxiliary subunit	Naa15	sp|Q80UM3|NAA15_MOUSE N-alpha-acetyltransferase 15, NatA auxiliary subunit OS=Mus musculus OX=10090 GN=Naa15 PE=1 SV=1;tr|G3X8Y3|G3X8Y3_MOUSE N-alpha-acetyltransferase 15, NatA auxiliary subunit OS=Mus musculus OX=10090 GN=Naa15 PE=1 SV=1;tr|A0A0A6YW80|A0A	5	34	34	31	23	25	24	27	25	26	23	25	24	27	25	26	22	22	22	24	23	24	40.9	40.9	37.5	100.96	865	865;865;815;126;237	3.7	99	22	48	69	78	0	123.06	By MS/MS	By MS/MS	By MS/MS	By MS/MS	By MS/MS	By MS/MS
Q9D6Z1;E0CXZ0;A2APD7;F7CHQ7;F6USW7;F7CHP9;F6U250;F6V095	Q9D6Z1	34;15;13;12;9;8;7;7	34;15;13;12;9;8;7;7	34;15;13;12;9;8;7;7	Nucleolar protein 56	Nop56	sp|Q9D6Z1|NOP56_MOUSE Nucleolar protein 56 OS=Mus musculus OX=10090 GN=Nop56 PE=1 SV=2	8	34	34	34	31	33	32	29	29	28	31	33	32	29	29	28	31	33	32	29	29	28	64	64	64	64.464	580	580;261;296;222;125;173;135;173	3.29	182	63	99	39	110	0	291.74	By MS/MS	By MS/MS	By MS/MS	By MS/MS	By MS/MS	By MS/MS
Q8CGY8	Q8CGY8	34	34	34	UDP-N-acetylglucosamine--peptide N-acetylglucosaminyltransferase 110 kDa subunit	Ogt	sp|Q8CGY8|OGT1_MOUSE UDP-N-acetylglucosamine--peptide N-acetylglucosaminyltransferase 110 kDa subunit OS=Mus musculus OX=10090 GN=Ogt PE=1 SV=2	1	34	34	34	30	26	29	26	27	26	30	26	29	26	27	26	30	26	29	26	27	26	41.1	41.1	41.1	116.95	1046	1046	3.93	96	23	60	62	112	0	226.09	By MS/MS	By MS/MS	By MS/MS	By MS/MS	By MS/MS	By MS/MS
P09103;E9Q8G8	P09103	34;10	34;10	34;10	Protein disulfide-isomerase	P4hb	sp|P09103|PDIA1_MOUSE Protein disulfide-isomerase OS=Mus musculus OX=10090 GN=P4hb PE=1 SV=2	2	34	34	34	26	29	32	29	32	30	26	29	32	29	32	30	26	29	32	29	32	30	69.4	69.4	69.4	57.058	509	509;165	3.44	184	66	82	88	115	0	323.31	By MS/MS	By MS/MS	By MS/MS	By MS/MS	By MS/MS	By MS/MS
P08003;A0A0R4J0Z1	P08003;A0A0R4J0Z1	34;34	33;33	33;33	Protein disulfide-isomerase A4	Pdia4	sp|P08003|PDIA4_MOUSE Protein disulfide-isomerase A4 OS=Mus musculus OX=10090 GN=Pdia4 PE=1 SV=3;tr|A0A0R4J0Z1|A0A0R4J0Z1_MOUSE Protein disulfide-isomerase A4 OS=Mus musculus OX=10090 GN=Pdia4 PE=1 SV=1	2	34	33	33	31	30	32	32	31	31	30	30	31	31	30	30	30	30	31	31	30	30	56.4	54.1	54.1	71.982	638	638;641	3.46	185	63	104	85	116	0	321.28	By MS/MS	By MS/MS	By MS/MS	By MS/MS	By MS/MS	By MS/MS
P33609	P33609	34	34	34	DNA polymerase alpha catalytic subunit	Pola1	sp|P33609|DPOLA_MOUSE DNA polymerase alpha catalytic subunit OS=Mus musculus OX=10090 GN=Pola1 PE=1 SV=2	1	34	34	34	29	27	28	22	23	23	29	27	28	22	23	23	29	27	28	22	23	23	28.5	28.5	28.5	167.34	1465	1465	3.49	81	59	36	33	65	0	145.89	By MS/MS	By MS/MS	By MS/MS	By MS/MS	By MS/MS	By MS/MS
Q91YK2;A0A494BAM4;D6RDD0;A0A494B9S4	Q91YK2	34;4;4;2	34;4;4;2	34;4;4;2	Ribosomal RNA processing protein 1 homolog B	Rrp1b	sp|Q91YK2|RRP1B_MOUSE Ribosomal RNA processing protein 1 homolog B OS=Mus musculus OX=10090 GN=Rrp1b PE=1 SV=2	4	34	34	34	25	28	24	22	26	25	25	28	24	22	26	25	25	28	24	22	26	25	59.4	59.4	59.4	80.581	724	724;82;118;122	3.41	108	45	56	86	42	0	323.31	By MS/MS	By MS/MS	By MS/MS	By MS/MS	By MS/MS	By MS/MS
Q8K4Z5	Q8K4Z5	34	34	34	Splicing factor 3A subunit 1	Sf3a1	sp|Q8K4Z5|SF3A1_MOUSE Splicing factor 3A subunit 1 OS=Mus musculus OX=10090 GN=Sf3a1 PE=1 SV=1	1	34	34	34	30	30	33	32	33	29	30	30	33	32	33	29	30	30	33	32	33	29	50.6	50.6	50.6	88.544	791	791	3.31	172	106	106	84	80	0	307.06	By MS/MS	By MS/MS	By MS/MS	By MS/MS	By MS/MS	By MS/MS
Q3UJB0;A0A494B9S9	Q3UJB0	34;12	34;12	34;12		Sf3b2	tr|Q3UJB0|Q3UJB0_MOUSE Splicing factor 3b, subunit 2 OS=Mus musculus OX=10090 GN=Sf3b2 PE=1 SV=1	2	34	34	34	28	32	30	28	30	29	28	32	30	28	30	29	28	32	30	28	30	29	50.1	50.1	50.1	98.197	878	878;308	3.48	188	57	127	120	98	0	323.31	By MS/MS	By MS/MS	By MS/MS	By MS/MS	By MS/MS	By MS/MS
Q8VIJ6	Q8VIJ6	34	34	32	Splicing factor, proline- and glutamine-rich	Sfpq	sp|Q8VIJ6|SFPQ_MOUSE Splicing factor, proline- and glutamine-rich OS=Mus musculus OX=10090 GN=Sfpq PE=1 SV=1	1	34	34	32	26	29	30	25	27	25	26	29	30	25	27	25	24	27	28	24	26	23	44.5	44.5	43.1	75.441	699	699	2.9	174	56	73	64	36	0	323.31	By MS/MS	By MS/MS	By MS/MS	By MS/MS	By MS/MS	By MS/MS
Q04692;A0A0N4SUP7;A0A0N4SVP9;A0A0N4SVS7;A0A0N4SUQ5;A0A0N4SVV9	Q04692	34;4;4;2;2;1	34;4;4;2;2;1	34;4;4;2;2;1	SWI/SNF-related matrix-associated actin-dependent regulator of chromatin subfamily A containing DEAD/H box 1	Smarcad1	sp|Q04692|SMRCD_MOUSE SWI/SNF-related matrix-associated actin-dependent regulator of chromatin subfamily A containing DEAD/H box 1 OS=Mus musculus OX=10090 GN=Smarcad1 PE=1 SV=2	6	34	34	34	24	26	30	28	29	26	24	26	30	28	29	26	24	26	30	28	29	26	44.2	44.2	44.2	116.45	1021	1021;123;134;68;73;46	3.45	128	27	70	74	68	0	323.31	By MS/MS	By MS/MS	By MS/MS	By MS/MS	By MS/MS	By MS/MS
Q60864	Q60864	34	34	34	Stress-induced-phosphoprotein 1	Stip1	sp|Q60864|STIP1_MOUSE Stress-induced-phosphoprotein 1 OS=Mus musculus OX=10090 GN=Stip1 PE=1 SV=1	1	34	34	34	32	32	30	30	33	33	32	32	30	30	33	33	32	32	30	30	33	33	58	58	58	62.581	543	543	3.54	221	104	144	114	156	0	323.31	By MS/MS	By MS/MS	By MS/MS	By MS/MS	By MS/MS	By MS/MS
Q9D0R2;A0A2I3BPK8	Q9D0R2	34;3	34;3	33;3	Threonine--tRNA ligase, cytoplasmic	Tars	sp|Q9D0R2|SYTC_MOUSE Threonine--tRNA ligase 1, cytoplasmic OS=Mus musculus OX=10090 GN=Tars1 PE=1 SV=2	2	34	34	33	18	30	24	31	25	26	18	30	24	31	25	26	17	29	23	30	24	25	50.1	50.1	49	83.355	722	722;119	3.66	111	28	51	89	75	0	208.19	By MS/MS	By MS/MS	By MS/MS	By MS/MS	By MS/MS	By MS/MS
P39447;B9EHJ3;A0A0U1RPW2	P39447;B9EHJ3;A0A0U1RPW2	34;34;19	34;34;19	34;34;19	Tight junction protein ZO-1	Tjp1	sp|P39447|ZO1_MOUSE Tight junction protein ZO-1 OS=Mus musculus OX=10090 GN=Tjp1 PE=1 SV=2;tr|B9EHJ3|B9EHJ3_MOUSE Tight junction protein ZO-1 OS=Mus musculus OX=10090 GN=Tjp1 PE=1 SV=1;tr|A0A0U1RPW2|A0A0U1RPW2_MOUSE Tight junction protein ZO-1 OS=Mus muscu	3	34	34	34	29	25	25	21	23	25	29	25	25	21	23	25	29	25	25	21	23	25	26	26	26	194.74	1745	1745;1685;1128	3.53	56	61	45	40	38	0	222.62	By MS/MS	By MS/MS	By MS/MS	By MS/MS	By MS/MS	By MS/MS
Q5SWU9;V9GWS0;A0A0R4J1S9;V9GWS1;V9GWR9;D3Z0B3;V9GXY1	Q5SWU9	33;9;4;3;2;2;1	33;9;4;3;2;2;1	31;7;3;3;2;0;1	Acetyl-CoA carboxylase 1;Biotin carboxylase	Acaca	sp|Q5SWU9|ACACA_MOUSE Acetyl-CoA carboxylase 1 OS=Mus musculus OX=10090 GN=Acaca PE=1 SV=1	7	33	33	31	8	7	10	22	23	27	8	7	10	22	23	27	7	6	10	21	21	25	17.4	17.4	16.9	265.25	2345	2345;312;157;87;83;146;228	4.28	14	23	16	37	31	0	102.49	By MS/MS	By MS/MS	By MS/MS	By MS/MS	By MS/MS	By MS/MS
E9PUR0;E9Q1M6;F7DE17;F7C545;F6YYD3;F7DD37;F6SI14;F6RRY0	E9PUR0;E9Q1M6	33;33;9;6;3;2;2;2	19;19;9;2;2;1;1;1	15;15;5;2;2;1;1;1		Ankhd1	tr|E9PUR0|E9PUR0_MOUSE Ankyrin repeat and KH domain-containing 1 OS=Mus musculus OX=10090 GN=Ankhd1 PE=1 SV=1;tr|E9Q1M6|E9Q1M6_MOUSE Ankyrin repeat and KH domain-containing 1 OS=Mus musculus OX=10090 GN=Ankhd1 PE=1 SV=1	8	33	19	15	31	22	26	20	28	25	18	12	15	10	15	14	15	10	12	8	11	11	18.8	12.1	8.5	269.67	2548	2548;2485;1021;214;111;91;219;335	3.86	22	6	40	25	16	0	64.245	By MS/MS	By MS/MS	By MS/MS	By MS/MS	By MS/MS	By MS/MS
P56480	P56480	33	33	33	ATP synthase subunit beta, mitochondrial	Atp5b	sp|P56480|ATPB_MOUSE ATP synthase subunit beta, mitochondrial OS=Mus musculus OX=10090 GN=Atp5f1b PE=1 SV=2	1	33	33	33	26	29	31	31	30	30	26	29	31	31	30	30	26	29	31	31	30	30	69.6	69.6	69.6	56.3	529	529	3.77	291	48	120	180	268	0	323.31	By MS/MS	By MS/MS	By MS/MS	By MS/MS	By MS/MS	By MS/MS
P53569;A0A0R4J046;A0A3B2WCE8	P53569;A0A0R4J046;A0A3B2WCE8	33;31;19	33;31;19	33;31;19	CCAAT/enhancer-binding protein zeta	Cebpz	sp|P53569|CEBPZ_MOUSE CCAAT/enhancer-binding protein zeta OS=Mus musculus OX=10090 GN=Cebpz PE=1 SV=2;tr|A0A0R4J046|A0A0R4J046_MOUSE CCAAT/enhancer-binding protein zeta OS=Mus musculus OX=10090 GN=Cebpz PE=1 SV=1;tr|A0A3B2WCE8|A0A3B2WCE8_MOUSE CCAAT/enhanc	3	33	33	33	23	24	31	22	25	23	23	24	31	22	25	23	23	24	31	22	25	23	38.4	38.4	38.4	120.26	1052	1052;1052;461	3.88	86	28	38	49	100	0	150.19	By MS/MS	By MS/MS	By MS/MS	By MS/MS	By MS/MS	By MS/MS
Q9QZE5;Q7TNQ1	Q9QZE5	33;8	33;8	30;7	Coatomer subunit gamma-1	Copg1	sp|Q9QZE5|COPG1_MOUSE Coatomer subunit gamma-1 OS=Mus musculus OX=10090 GN=Copg1 PE=1 SV=1	2	33	33	30	20	25	28	29	24	25	20	25	28	29	24	25	17	22	25	26	21	22	46.9	46.9	42.8	97.512	874	874;121	3.76	89	16	48	48	83	0	223.22	By MS/MS	By MS/MS	By MS/MS	By MS/MS	By MS/MS	By MS/MS
Q9CSH3;A0A2I3BR78	Q9CSH3;A0A2I3BR78	33;19	33;19	33;19	Exosome complex exonuclease RRP44	Dis3	sp|Q9CSH3|RRP44_MOUSE Exosome complex exonuclease RRP44 OS=Mus musculus OX=10090 GN=Dis3 PE=1 SV=4;tr|A0A2I3BR78|A0A2I3BR78_MOUSE Exosome complex exonuclease RRP44 OS=Mus musculus OX=10090 GN=Dis3 PE=1 SV=1	2	33	33	33	24	25	26	27	29	28	24	25	26	27	29	28	24	25	26	27	29	28	42.1	42.1	42.1	108.84	958	958;566	3.72	105	19	68	83	77	0	207.91	By MS/MS	By MS/MS	By MS/MS	By MS/MS	By MS/MS	By MS/MS
Q05D44	Q05D44	33	33	33	Eukaryotic translation initiation factor 5B	Eif5b	sp|Q05D44|IF2P_MOUSE Eukaryotic translation initiation factor 5B OS=Mus musculus OX=10090 GN=Eif5b PE=1 SV=2	1	33	33	33	25	27	26	28	29	25	25	27	26	28	29	25	25	27	26	28	29	25	27.1	27.1	27.1	137.61	1216	1216	3.51	97	57	42	47	73	0	190.06	By MS/MS	By MS/MS	By MS/MS	By MS/MS	By MS/MS	By MS/MS
Q8VHX6	Q8VHX6	33	23	23	Filamin-C	Flnc	sp|Q8VHX6|FLNC_MOUSE Filamin-C OS=Mus musculus OX=10090 GN=Flnc PE=1 SV=3	1	33	23	23	22	17	26	18	18	20	15	8	16	10	10	13	15	8	16	10	10	13	17.3	13.2	13.2	291.12	2726	2726	4.62	3	8	25	20	23	0	73.78	By MS/MS	By MS/MS	By MS/MS	By MS/MS	By MS/MS	By MS/MS
Q80WE4;A0A286YCI2;A0A286YCY2;A0A286YE94	Q80WE4	33;7;4;1	33;7;4;1	31;7;4;1	Kinesin-like protein KIF20B	Kif20b	sp|Q80WE4|KI20B_MOUSE Kinesin-like protein KIF20B OS=Mus musculus OX=10090 GN=Kif20b PE=1 SV=3	4	33	33	31	23	20	26	22	24	23	23	20	26	22	24	23	22	19	25	21	23	22	26.4	26.4	24.8	203.51	1774	1774;207;214;40	4.01	32	25	50	51	36	0	133.66	By MS/MS	By MS/MS	By MS/MS	By MS/MS	By MS/MS	By MS/MS
P26041	P26041	33	33	20	Moesin	Msn	sp|P26041|MOES_MOUSE Moesin OS=Mus musculus OX=10090 GN=Msn PE=1 SV=3	1	33	33	20	21	26	29	27	26	25	21	26	29	27	26	25	14	14	17	16	15	14	59.4	59.4	39.3	67.766	577	577	3.3	133	32	74	58	61	0	160.5	By MS/MS	By MS/MS	By MS/MS	By MS/MS	By MS/MS	By MS/MS
P09405;A0A087WRM5	P09405	33;1	33;1	33;1	Nucleolin	Ncl	sp|P09405|NUCL_MOUSE Nucleolin OS=Mus musculus OX=10090 GN=Ncl PE=1 SV=2	2	33	33	33	30	31	28	28	29	30	30	31	28	28	29	30	30	31	28	28	29	30	40.5	40.5	40.5	76.722	707	707;76	3.96	298	180	446	318	349	0	323.31	By MS/MS	By MS/MS	By MS/MS	By MS/MS	By MS/MS	By MS/MS
Q6DFW4;A0A0A0MQ76;A0A087WQ46;A0A087WSU5;A0A087WSL8;A0A087WP00;A0A087WNW0	Q6DFW4;A0A0A0MQ76	33;23;13;10;9;8;3	33;23;13;10;9;8;3	33;23;13;10;9;8;3	Nucleolar protein 58	Nop58	sp|Q6DFW4|NOP58_MOUSE Nucleolar protein 58 OS=Mus musculus OX=10090 GN=Nop58 PE=1 SV=1;tr|A0A0A0MQ76|A0A0A0MQ76_MOUSE Nucleolar protein 58 OS=Mus musculus OX=10090 GN=Nop58 PE=1 SV=1	7	33	33	33	28	28	29	22	23	23	28	28	29	22	23	23	28	28	29	22	23	23	65.9	65.9	65.9	60.342	536	536;444;213;146;191;195;60	3.51	155	66	103	48	121	0	323.31	By MS/MS	By MS/MS	By MS/MS	By MS/MS	By MS/MS	By MS/MS
Q8BML9;D3Z158;A0A140LHZ5;A0A140LIS6;A0A140LHB3;A0A0A6YY08;A0A140LIN2;A0A140LHJ3;A0A140LJK5;A0A140LJH2;A0A140LID3;F6TDS3;A0A140LIR0;A0A140LIZ4;A0A140LJH1;A0A140LII8;A0A140LHC3	Q8BML9;D3Z158	33;32;11;10;9;8;8;8;7;7;7;6;6;4;4;3;1	33;32;11;10;9;8;8;8;7;7;7;6;6;4;4;3;1	33;32;11;10;9;8;8;8;7;7;7;6;6;4;4;3;1		Qars	sp|Q8BML9|SYQ_MOUSE Glutamine--tRNA ligase OS=Mus musculus OX=10090 GN=Qars1 PE=1 SV=1;tr|D3Z158|D3Z158_MOUSE Glutaminyl-tRNA synthetase OS=Mus musculus OX=10090 GN=Qars PE=1 SV=2	17	33	33	33	20	27	24	25	27	24	20	27	24	25	27	24	20	27	24	25	27	24	49.7	49.7	49.7	87.676	775	775;751;341;273;246;152;160;173;182;134;153;154;121;117;100;79;67	3.87	128	5	33	70	136	0	210.79	By MS/MS	By MS/MS	By MS/MS	By MS/MS	By MS/MS	By MS/MS
P70388;Q5SV02;A8Y5I3;E9PUJ2	P70388;Q5SV02	33;33;16;14	33;33;16;14	33;33;16;14	DNA repair protein RAD50	Rad50	sp|P70388|RAD50_MOUSE DNA repair protein RAD50 OS=Mus musculus OX=10090 GN=Rad50 PE=1 SV=1;tr|Q5SV02|Q5SV02_MOUSE DNA repair protein RAD50 OS=Mus musculus OX=10090 GN=Rad50 PE=1 SV=1	4	33	33	33	23	17	25	25	25	24	23	17	25	25	25	24	23	17	25	25	25	24	29.2	29.2	29.2	153.49	1312	1312;1312;657;551	3.58	60	38	56	58	29	0	121.05	By MS/MS	By MS/MS	By MS/MS	By MS/MS	By MS/MS	By MS/MS
Q9D0I9	Q9D0I9	33	33	33	Arginine--tRNA ligase, cytoplasmic	Rars	sp|Q9D0I9|SYRC_MOUSE Arginine--tRNA ligase, cytoplasmic OS=Mus musculus OX=10090 GN=Rars1 PE=1 SV=2	1	33	33	33	23	28	29	30	26	26	23	28	29	30	26	26	23	28	29	30	26	26	55	55	55	75.673	660	660	3.62	152	50	66	126	97	0	323.31	By MS/MS	By MS/MS	By MS/MS	By MS/MS	By MS/MS	By MS/MS
Q8C7R4;D3Z061	Q8C7R4;D3Z061	33;31	33;31	33;31	Ubiquitin-like modifier-activating enzyme 6	Uba6	sp|Q8C7R4|UBA6_MOUSE Ubiquitin-like modifier-activating enzyme 6 OS=Mus musculus OX=10090 GN=Uba6 PE=1 SV=1;tr|D3Z061|D3Z061_MOUSE E1 ubiquitin-activating enzyme OS=Mus musculus OX=10090 GN=Uba6 PE=1 SV=1	2	33	33	33	25	25	29	28	26	25	25	25	29	28	26	25	25	25	29	28	26	25	44.6	44.6	44.6	117.96	1053	1053;1022	3.7	89	31	69	59	72	0	141.34	By MS/MS	By MS/MS	By MS/MS	By MS/MS	By MS/MS	By MS/MS
A2A7S7;Q91WQ3;F6VXZ2	A2A7S7;Q91WQ3	33;32;3	33;32;3	33;32;3	Tyrosine--tRNA ligase;Tyrosine--tRNA ligase, cytoplasmic;Tyrosine--tRNA ligase, cytoplasmic, N-terminally processed	Yars	tr|A2A7S7|A2A7S7_MOUSE Tyrosine--tRNA ligase OS=Mus musculus OX=10090 GN=Yars PE=1 SV=1;sp|Q91WQ3|SYYC_MOUSE Tyrosine--tRNA ligase, cytoplasmic OS=Mus musculus OX=10090 GN=Yars1 PE=1 SV=3	3	33	33	33	29	28	29	30	32	32	29	28	29	30	32	32	29	28	29	30	32	32	62.4	62.4	62.4	63.001	564	564;528;129	3.57	140	22	74	100	81	0	182.54	By MS/MS	By MS/MS	By MS/MS	By MS/MS	By MS/MS	By MS/MS
A6ZI44;A0A0U1RPT5;D3YV98	A6ZI44;A0A0U1RPT5;D3YV98	32;17;16	2;2;2	2;2;2	Fructose-bisphosphate aldolase	Aldoa	tr|A6ZI44|A6ZI44_MOUSE Fructose-bisphosphate aldolase OS=Mus musculus OX=10090 GN=Aldoa PE=1 SV=1;tr|A0A0U1RPT5|A0A0U1RPT5_MOUSE Fructose-bisphosphate aldolase (Fragment) OS=Mus musculus OX=10090 GN=Aldoa PE=1 SV=1;tr|D3YV98|D3YV98_MOUSE Fructose-bisphosph	3	32	2	2	25	28	28	27	27	29	2	0	2	1	2	2	2	0	2	1	2	2	80.1	5	5	45.12	418	418;209;193	4.56			4	5		0	8.685	By MS/MS	By matching	By MS/MS	By matching	By MS/MS	By MS/MS
P05064;Q9CPQ9;A6ZI46;D3YWI1;D3Z510;A0A0U1RPN8;Q91Y97	P05064;Q9CPQ9;A6ZI46;D3YWI1;D3Z510;A0A0U1RPN8	32;22;22;21;18;18;1	32;22;22;21;18;18;1	2;0;0;2;2;2;0	Fructose-bisphosphate aldolase A;Fructose-bisphosphate aldolase	Aldoa;Aldoart1	sp|P05064|ALDOA_MOUSE Fructose-bisphosphate aldolase A OS=Mus musculus OX=10090 GN=Aldoa PE=1 SV=2;tr|Q9CPQ9|Q9CPQ9_MOUSE Fructose-bisphosphate aldolase OS=Mus musculus OX=10090 GN=Aldoart1 PE=1 SV=1;tr|A6ZI46|A6ZI46_MOUSE Fructose-bisphosphate aldolase OS	7	32	32	2	25	30	28	28	27	29	25	30	28	28	27	29	2	2	2	2	2	2	89.8	89.8	3.6	39.355	364	364;364;419;236;180;190;364	3.72	276	76	127	275	184	0	323.31	By MS/MS	By MS/MS	By MS/MS	By MS/MS	By MS/MS	By MS/MS
Q9DBG3;H3BKM0;H3BIY9;H3BJ06;Q5SWR0	Q9DBG3;H3BKM0;H3BIY9	32;30;30;9;1	32;30;30;9;1	18;18;16;4;0	AP-2 complex subunit beta;AP complex subunit beta	Ap2b1	sp|Q9DBG3|AP2B1_MOUSE AP-2 complex subunit beta OS=Mus musculus OX=10090 GN=Ap2b1 PE=1 SV=1;tr|H3BKM0|H3BKM0_MOUSE AP complex subunit beta OS=Mus musculus OX=10090 GN=Ap2b1 PE=1 SV=1;tr|H3BIY9|H3BIY9_MOUSE AP complex subunit beta OS=Mus musculus OX=10090 G	5	32	32	18	24	27	30	27	29	25	24	27	30	27	29	25	13	15	16	14	17	15	40.9	40.9	24.8	104.58	937	937;913;942;199;44	3.79	113	38	70	55	119	0	205.39	By MS/MS	By MS/MS	By MS/MS	By MS/MS	By MS/MS	By MS/MS
Q62388;B9EHX4;D3Z0Q2;F6UXV2	Q62388;B9EHX4	32;32;3;3	32;32;3;3	32;32;3;3	Serine-protein kinase ATM	Atm	sp|Q62388|ATM_MOUSE Serine-protein kinase ATM OS=Mus musculus OX=10090 GN=Atm PE=1 SV=2;tr|B9EHX4|B9EHX4_MOUSE Serine-protein kinase ATM OS=Mus musculus OX=10090 GN=Atm PE=1 SV=1	4	32	32	32	20	19	28	11	11	12	20	19	28	11	11	12	20	19	28	11	11	12	13.6	13.6	13.6	349.41	3066	3066;3063;140;201	4.31	11	20	27	32	29	0	98.31	By MS/MS	By MS/MS	By MS/MS	By MS/MS	By MS/MS	By MS/MS
P16381	P16381	32	2	2	Putative ATP-dependent RNA helicase Pl10	D1Pas1	sp|P16381|DDX3L_MOUSE Putative ATP-dependent RNA helicase Pl10 OS=Mus musculus OX=10090 GN=D1Pas1 PE=1 SV=1	1	32	2	2	25	27	29	23	28	28	1	0	2	0	1	0	1	0	2	0	1	0	40.9	3.9	3.9	73.14	660	660	4.25			3	1		0.0072663	2.0665	By MS/MS	By matching	By MS/MS	By matching	By MS/MS	By matching
Q91VR5;A0A1Y7VM48	Q91VR5	32;7	32;7	32;7	ATP-dependent RNA helicase DDX1	Ddx1	sp|Q91VR5|DDX1_MOUSE ATP-dependent RNA helicase DDX1 OS=Mus musculus OX=10090 GN=Ddx1 PE=1 SV=1	2	32	32	32	29	29	30	30	29	28	29	29	30	30	29	28	29	29	30	30	29	28	47.3	47.3	47.3	82.499	740	740;190	3.69	155	25	74	103	120	0	323.31	By MS/MS	By MS/MS	By MS/MS	By MS/MS	By MS/MS	By MS/MS
Q8K1M6;A0A2U3TZ67	Q8K1M6;A0A2U3TZ67	32;26	32;26	2;2	Dynamin-1-like protein	Dnm1l	sp|Q8K1M6|DNM1L_MOUSE Dynamin-1-like protein OS=Mus musculus OX=10090 GN=Dnm1l PE=1 SV=2;tr|A0A2U3TZ67|A0A2U3TZ67_MOUSE Dynamin-1-like protein OS=Mus musculus OX=10090 GN=Dnm1l PE=1 SV=1	2	32	32	2	23	26	31	23	24	26	23	26	31	23	24	26	2	1	2	1	2	2	54.2	54.2	6.1	82.657	742	742;587	3.6	107	43	35	59	86	0	257.87	By MS/MS	By MS/MS	By MS/MS	By MS/MS	By MS/MS	By MS/MS
Q60848;D3Z414	Q60848	32;7	32;7	32;7	Lymphocyte-specific helicase	Hells	sp|Q60848|HELLS_MOUSE Lymphocyte-specific helicase OS=Mus musculus OX=10090 GN=Hells PE=1 SV=2	2	32	32	32	26	28	29	28	27	28	26	28	29	28	27	28	26	28	29	28	27	28	48.6	48.6	48.6	95.125	821	821;209	3.39	120	76	84	81	52	0	323.31	By MS/MS	By MS/MS	By MS/MS	By MS/MS	By MS/MS	By MS/MS
Q8CAQ8;E9Q800;E9QAY6;A0A1B0GX08;A0A0U1RQ14	Q8CAQ8;E9Q800;E9QAY6	32;28;22;11;9	32;28;22;11;9	13;9;3;1;9	MICOS complex subunit Mic60	Immt	sp|Q8CAQ8|MIC60_MOUSE MICOS complex subunit Mic60 OS=Mus musculus OX=10090 GN=Immt PE=1 SV=1;tr|E9Q800|E9Q800_MOUSE MICOS complex subunit MIC60 OS=Mus musculus OX=10090 GN=Immt PE=1 SV=1;tr|E9QAY6|E9QAY6_MOUSE MICOS complex subunit MIC60 OS=Mus musculus OX	5	32	32	13	28	29	29	26	29	28	28	29	29	26	29	28	10	12	11	10	11	11	50.7	50.7	22.7	83.899	757	757;679;470;264;289	3.37	124	50	71	41	77	0	241.42	By MS/MS	By MS/MS	By MS/MS	By MS/MS	By MS/MS	By MS/MS
P70168	P70168	32	32	32	Importin subunit beta-1	Kpnb1	sp|P70168|IMB1_MOUSE Importin subunit beta-1 OS=Mus musculus OX=10090 GN=Kpnb1 PE=1 SV=2	1	32	32	32	24	30	31	31	22	25	24	30	31	31	22	25	24	30	31	31	22	25	44.3	44.3	44.3	97.183	876	876	3.71	213	39	101	108	191	0	323.31	By MS/MS	By MS/MS	By MS/MS	By MS/MS	By MS/MS	By MS/MS
P21619;A0A0R4J0Q5	P21619;A0A0R4J0Q5	32;30	29;27	29;27	Lamin-B2	Lmnb2	sp|P21619|LMNB2_MOUSE Lamin-B2 OS=Mus musculus OX=10090 GN=Lmnb2 PE=1 SV=2;tr|A0A0R4J0Q5|A0A0R4J0Q5_MOUSE Lamin-B2 OS=Mus musculus OX=10090 GN=Lmnb2 PE=1 SV=1	2	32	29	29	25	22	29	21	23	26	23	19	26	19	20	23	23	19	26	19	20	23	57.9	52.7	52.7	67.317	596	596;615	3.5	69	16	52	45	35	0	140.55	By MS/MS	By MS/MS	By MS/MS	By MS/MS	By MS/MS	By MS/MS
A0A0R4J0H7;Q8K2Z4;A0A087WNQ1;A0A087WRK6	A0A0R4J0H7;Q8K2Z4	32;31;5;4	32;31;5;4	32;31;5;4	Condensin complex subunit 1	Ncapd2	tr|A0A0R4J0H7|A0A0R4J0H7_MOUSE Condensin complex subunit 1 OS=Mus musculus OX=10090 GN=Ncapd2 PE=1 SV=1;sp|Q8K2Z4|CND1_MOUSE Condensin complex subunit 1 OS=Mus musculus OX=10090 GN=Ncapd2 PE=1 SV=2	4	32	32	32	25	24	25	26	26	25	25	24	25	26	26	25	25	24	25	26	26	25	29.2	29.2	29.2	155.59	1392	1392;1392;162;94	3.79	72	44	67	27	86	0	139.9	By MS/MS	By MS/MS	By MS/MS	By MS/MS	By MS/MS	By MS/MS
Q9WU78	Q9WU78	32	32	32	Programmed cell death 6-interacting protein	Pdcd6ip	sp|Q9WU78|PDC6I_MOUSE Programmed cell death 6-interacting protein OS=Mus musculus OX=10090 GN=Pdcd6ip PE=1 SV=3	1	32	32	32	29	26	30	23	25	30	29	26	30	23	25	30	29	26	30	23	25	30	48	48	48	96.023	869	869	3.66	85	22	60	70	54	0	212.71	By MS/MS	By MS/MS	By MS/MS	By MS/MS	By MS/MS	By MS/MS
Q76MZ3;G3UWL2;G3UXQ1;H3BJ83	Q76MZ3	32;7;2;2	32;7;2;2	27;7;0;0	Serine/threonine-protein phosphatase 2A 65 kDa regulatory subunit A alpha isoform	Ppp2r1a	sp|Q76MZ3|2AAA_MOUSE Serine/threonine-protein phosphatase 2A 65 kDa regulatory subunit A alpha isoform OS=Mus musculus OX=10090 GN=Ppp2r1a PE=1 SV=3	4	32	32	27	24	30	28	27	25	24	24	30	28	27	25	24	21	25	24	23	23	22	60.3	60.3	52.1	65.322	589	589;143;88;135	3.69	142	29	67	66	128	0	230.67	By MS/MS	By MS/MS	By MS/MS	By MS/MS	By MS/MS	By MS/MS
Q3TXS7;J3QN38;D6RGR5	Q3TXS7	32;8;2	32;8;2	32;8;2	26S proteasome non-ATPase regulatory subunit 1	Psmd1	sp|Q3TXS7|PSMD1_MOUSE 26S proteasome non-ATPase regulatory subunit 1 OS=Mus musculus OX=10090 GN=Psmd1 PE=1 SV=1	3	32	32	32	25	29	28	30	30	27	25	29	28	30	30	27	25	29	28	30	30	27	42.2	42.2	42.2	105.73	953	953;98;48	3.62	122	53	83	80	88	0	271.96	By MS/MS	By MS/MS	By MS/MS	By MS/MS	By MS/MS	By MS/MS
Q6PGB8;F6Z6F4;Q8BS67;F6QS43	Q6PGB8;F6Z6F4	32;20;13;3	16;12;9;3	16;12;9;3	Probable global transcription activator SNF2L1	Smarca1	sp|Q6PGB8|SMCA1_MOUSE Probable global transcription activator SNF2L1 OS=Mus musculus OX=10090 GN=Smarca1 PE=1 SV=1;tr|F6Z6F4|F6Z6F4_MOUSE Probable global transcription activator SNF2L1 (Fragment) OS=Mus musculus OX=10090 GN=Smarca1 PE=1 SV=1	4	32	16	16	19	25	28	19	19	18	11	12	14	7	9	7	11	12	14	7	9	7	33.1	19.1	19.1	121.71	1046	1046;768;381;117	3.74	22	13	19	14	21	0	61.726	By MS/MS	By MS/MS	By MS/MS	By MS/MS	By MS/MS	By MS/MS
H9KV00;Q9QX47;H9KV01;H9KV15;H9KV02;F7CU80	H9KV00;Q9QX47;H9KV01;H9KV15	32;30;27;27;9;4	32;30;27;27;9;4	32;30;27;27;9;4	Protein SON	Son	tr|H9KV00|H9KV00_MOUSE Protein SON OS=Mus musculus OX=10090 GN=Son PE=1 SV=1;sp|Q9QX47|SON_MOUSE Protein SON OS=Mus musculus OX=10090 GN=Son PE=1 SV=2;tr|H9KV01|H9KV01_MOUSE Protein SON OS=Mus musculus OX=10090 GN=Son PE=1 SV=1;tr|H9KV15|H9KV15_MOUSE Prote	6	32	32	32	25	26	28	21	28	24	25	26	28	21	28	24	25	26	28	21	28	24	19.5	19.5	19.5	268.82	2477	2477;2444;2321;2343;454;478	3.41	63	62	50	60	20	0	150.08	By MS/MS	By MS/MS	By MS/MS	By MS/MS	By MS/MS	By MS/MS
P05213;A0A2R8VHF3	P05213;A0A2R8VHF3	32;17	32;17	0;0	Tubulin alpha-1B chain	Tuba1b	sp|P05213|TBA1B_MOUSE Tubulin alpha-1B chain OS=Mus musculus OX=10090 GN=Tuba1b PE=1 SV=2;tr|A0A2R8VHF3|A0A2R8VHF3_MOUSE Tubulin alpha chain (Fragment) OS=Mus musculus OX=10090 GN=Gm49450 PE=3 SV=1	2	32	32	0	25	29	28	28	29	25	25	29	28	28	29	25	0	0	0	0	0	0	77.6	77.6	0	50.151	451	451;267	3.62	401	225	219	248	319	0	323.31	By MS/MS	By MS/MS	By MS/MS	By MS/MS	By MS/MS	By MS/MS
P68373	P68373	32	4	2	Tubulin alpha-1C chain	Tuba1c	sp|P68373|TBA1C_MOUSE Tubulin alpha-1C chain OS=Mus musculus OX=10090 GN=Tuba1c PE=1 SV=1	1	32	4	2	25	29	28	28	29	25	4	4	4	4	4	4	2	2	2	2	2	2	77.5	12.7	9.6	49.909	449	449	2.92	32	7		4	17	0	40.072	By MS/MS	By MS/MS	By MS/MS	By MS/MS	By MS/MS	By MS/MS
Q9CWF2	Q9CWF2	32	9	2	Tubulin beta-2B chain	Tubb2b	sp|Q9CWF2|TBB2B_MOUSE Tubulin beta-2B chain OS=Mus musculus OX=10090 GN=Tubb2b PE=1 SV=1	1	32	9	2	30	31	31	31	29	29	8	8	9	8	8	8	1	1	2	1	1	1	81.3	27.2	3.6	49.953	445	445	3.81	84	14	46	59	77	0	177.47	By MS/MS	By MS/MS	By MS/MS	By MS/MS	By MS/MS	By MS/MS
O35643;Q5SVG5;Q5SVG4	O35643;Q5SVG5;Q5SVG4	31;31;31	17;17;17	17;17;17	AP-1 complex subunit beta-1	Ap1b1	sp|O35643|AP1B1_MOUSE AP-1 complex subunit beta-1 OS=Mus musculus OX=10090 GN=Ap1b1 PE=1 SV=2;tr|Q5SVG5|Q5SVG5_MOUSE AP complex subunit beta OS=Mus musculus OX=10090 GN=Ap1b1 PE=1 SV=1;tr|Q5SVG4|Q5SVG4_MOUSE AP complex subunit beta OS=Mus musculus OX=10090	3	31	17	17	26	21	29	26	25	24	15	9	15	13	13	14	15	9	15	13	13	14	40.5	24.5	24.5	103.93	943	943;916;923	3.66	48	6	41	36	30	0	98.033	By MS/MS	By MS/MS	By MS/MS	By MS/MS	By MS/MS	By MS/MS
P80313;A0A0N4SV00;A0A0N4SV22;A0A0N4SUI8	P80313;A0A0N4SV00	31;27;4;2	31;27;4;2	31;27;4;2	T-complex protein 1 subunit eta	Cct7	sp|P80313|TCPH_MOUSE T-complex protein 1 subunit eta OS=Mus musculus OX=10090 GN=Cct7 PE=1 SV=1;tr|A0A0N4SV00|A0A0N4SV00_MOUSE T-complex protein 1 subunit eta OS=Mus musculus OX=10090 GN=Cct7 PE=1 SV=1	4	31	31	31	25	27	25	26	27	27	25	27	25	26	27	27	25	27	25	26	27	27	63.1	63.1	63.1	59.652	544	544;502;83;79	3.47	187	106	100	78	134	0	323.31	By MS/MS	By MS/MS	By MS/MS	By MS/MS	By MS/MS	By MS/MS
O55029	O55029	31	31	31	Coatomer subunit beta	Copb2	sp|O55029|COPB2_MOUSE Coatomer subunit beta OS=Mus musculus OX=10090 GN=Copb2 PE=1 SV=2	1	31	31	31	21	19	26	25	22	21	21	19	26	25	22	21	21	19	26	25	22	21	40.9	40.9	40.9	102.45	905	905	3.54	69	12	76	50	30	0	152.77	By MS/MS	By MS/MS	By MS/MS	By MS/MS	By MS/MS	By MS/MS
Q921N6;H3BLJ6	Q921N6	31;9	31;9	31;9	Probable ATP-dependent RNA helicase DDX27	Ddx27	sp|Q921N6|DDX27_MOUSE Probable ATP-dependent RNA helicase DDX27 OS=Mus musculus OX=10090 GN=Ddx27 PE=1 SV=3	2	31	31	31	22	26	26	25	23	28	22	26	26	25	23	28	22	26	26	25	23	28	40.9	40.9	40.9	85.938	760	760;310	3.33	108	46	69	70	39	0	124.82	By MS/MS	By MS/MS	By MS/MS	By MS/MS	By MS/MS	By MS/MS
E9PUD2	E9PUD2	31	1	1		Dnm1l	tr|E9PUD2|E9PUD2_MOUSE Dynamin-1-like protein OS=Mus musculus OX=10090 GN=Dnm1l PE=1 SV=1	1	31	1	1	22	25	29	22	23	25	1	0	0	0	1	1	1	0	0	0	1	1	53.1	2.9	2.9	79.532	712	712	3.25	1		3			0	26.781	By MS/MS	By matching	By matching	By matching	By MS/MS	By matching
A0A0R4J112;Z4YKC4;Q80XI3;A2AMI2;A0A0N4SVL0;A2AMI7;A2AMI6;A2AMI3	A0A0R4J112;Z4YKC4;Q80XI3;A2AMI2;A0A0N4SVL0;A2AMI7	31;30;28;28;28;24;3;1	27;26;24;24;24;20;3;1	27;26;24;24;24;20;3;1	Eukaryotic translation initiation factor 4 gamma 3	Eif4g3	tr|A0A0R4J112|A0A0R4J112_MOUSE Eukaryotic translation initiation factor 4 gamma 3 OS=Mus musculus OX=10090 GN=Eif4g3 PE=1 SV=1;tr|Z4YKC4|Z4YKC4_MOUSE Eukaryotic translation initiation factor 4 gamma 3 OS=Mus musculus OX=10090 GN=Eif4g3 PE=1 SV=1;sp|Q80XI3|	8	31	27	27	24	19	26	9	7	8	20	15	22	5	3	4	20	15	22	5	3	4	28.1	25.5	25.5	174.72	1578	1578;1567;1579;1579;1762;1002;509;146	4.15	13	10	28	25	19	0	90.869	By MS/MS	By MS/MS	By MS/MS	By MS/MS	By MS/MS	By MS/MS
Q60902;A0A1D5RLS1	Q60902;A0A1D5RLS1	31;26	31;26	31;26	Epidermal growth factor receptor substrate 15-like 1	Eps15l1	sp|Q60902|EP15R_MOUSE Epidermal growth factor receptor substrate 15-like 1 OS=Mus musculus OX=10090 GN=Eps15l1 PE=1 SV=3;tr|A0A1D5RLS1|A0A1D5RLS1_MOUSE Epidermal growth factor receptor substrate 15-like 1 OS=Mus musculus OX=10090 GN=Eps15l1 PE=1 SV=1	2	31	31	31	26	15	25	17	20	20	26	15	25	17	20	20	26	15	25	17	20	20	48.5	48.5	48.5	99.307	907	907;599	3.56	45	47	56	32	29	0	145.67	By MS/MS	By MS/MS	By MS/MS	By MS/MS	By MS/MS	By MS/MS
P30416;F6S2D5;F7CAT1	P30416	31;15;12	31;15;12	31;15;12	Peptidyl-prolyl cis-trans isomerase FKBP4;Peptidyl-prolyl cis-trans isomerase FKBP4, N-terminally processed	Fkbp4	sp|P30416|FKBP4_MOUSE Peptidyl-prolyl cis-trans isomerase FKBP4 OS=Mus musculus OX=10090 GN=Fkbp4 PE=1 SV=5	3	31	31	31	26	28	29	28	27	27	26	28	29	28	27	27	26	28	29	28	27	27	63.8	63.8	63.8	51.572	458	458;260;187	3.67	183	71	84	100	160	0	323.31	By MS/MS	By MS/MS	By MS/MS	By MS/MS	By MS/MS	By MS/MS
Q9JKR6;F6TRP3;A0A1L1SQ34;E0CYZ2	Q9JKR6	31;9;7;7	31;9;7;7	31;9;7;7	Hypoxia up-regulated protein 1	Hyou1	sp|Q9JKR6|HYOU1_MOUSE Hypoxia up-regulated protein 1 OS=Mus musculus OX=10090 GN=Hyou1 PE=1 SV=1	4	31	31	31	27	23	28	23	29	30	27	23	28	23	29	30	27	23	28	23	29	30	41.2	41.2	41.2	111.18	999	999;227;153;172	3.71	132	21	71	120	87	0	323.31	By MS/MS	By MS/MS	By MS/MS	By MS/MS	By MS/MS	By MS/MS
A0A087WP14;A0A087WPX0;F8VQC7;A0A087WPW5;A0A087WRS1;A0A087WP85;A0A087WP48;A0A087WQD0;A0A087WQ25;Q61595;A0A087WR91;A0A087WPY8	A0A087WP14;A0A087WPX0;F8VQC7;A0A087WPW5;A0A087WRS1;A0A087WP85;A0A087WP48;A0A087WQD0;A0A087WQ25;Q61595	31;31;31;30;30;30;29;29;29;27;5;5	31;31;31;30;30;30;29;29;29;27;5;5	1;1;1;1;1;1;1;1;1;1;0;0	Kinectin	Ktn1	tr|A0A087WP14|A0A087WP14_MOUSE Kinectin OS=Mus musculus OX=10090 GN=Ktn1 PE=1 SV=1;tr|A0A087WPX0|A0A087WPX0_MOUSE Kinectin OS=Mus musculus OX=10090 GN=Ktn1 PE=1 SV=1;tr|F8VQC7|F8VQC7_MOUSE Kinectin OS=Mus musculus OX=10090 GN=Ktn1 PE=1 SV=1;tr|A0A087WPW5|A	12	31	31	1	23	17	24	21	23	21	23	17	24	21	23	21	1	0	0	0	1	0	32.2	32.2	1.7	147.03	1280	1280;1304;1327;1252;1275;1275;1223;1247;1270;1327;176;178	3.72	50	36	52	61	30	0	177.97	By MS/MS	By MS/MS	By MS/MS	By MS/MS	By MS/MS	By MS/MS
P46460;G3UX86;G3UX98	P46460	31;9;4	31;9;4	31;9;4	Vesicle-fusing ATPase	Nsf	sp|P46460|NSF_MOUSE Vesicle-fusing ATPase OS=Mus musculus OX=10090 GN=Nsf PE=1 SV=2	3	31	31	31	23	22	25	27	26	26	23	22	25	27	26	26	23	22	25	27	26	26	43	43	43	82.613	744	744;210;76	3.32	97	45	50	64	37	0	135.43	By MS/MS	By MS/MS	By MS/MS	By MS/MS	By MS/MS	By MS/MS
A0A0J9YUD5;B9EJ54;E9Q880	A0A0J9YUD5;B9EJ54	31;31;7	31;31;7	31;31;7		Nup205	tr|A0A0J9YUD5|A0A0J9YUD5_MOUSE Nucleoporin 205 OS=Mus musculus OX=10090 GN=Nup205 PE=1 SV=1;tr|B9EJ54|B9EJ54_MOUSE Nucleoporin 205 OS=Mus musculus OX=10090 GN=Nup205 PE=1 SV=1	3	31	31	31	23	26	25	22	24	22	23	26	25	22	24	22	23	26	25	22	24	22	19.5	19.5	19.5	233.1	2061	2061;2008;322	3.85	61	32	50	42	68	0	133.83	By MS/MS	By MS/MS	By MS/MS	By MS/MS	By MS/MS	By MS/MS
Q5SUR0;F6RUL9;G3UY86	Q5SUR0	31;4;2	31;4;2	31;4;2	Phosphoribosylformylglycinamidine synthase	Pfas	sp|Q5SUR0|PUR4_MOUSE Phosphoribosylformylglycinamidine synthase OS=Mus musculus OX=10090 GN=Pfas PE=1 SV=1	3	31	31	31	25	24	29	24	27	23	25	24	29	24	27	23	25	24	29	24	27	23	37.4	37.4	37.4	144.63	1337	1337;473;117	3.35	153	16	46	45	99	0	226.68	By MS/MS	By MS/MS	By MS/MS	By MS/MS	By MS/MS	By MS/MS
P46471;Q8BVQ9	P46471;Q8BVQ9	31;30	31;30	31;30	26S protease regulatory subunit 7	Psmc2	sp|P46471|PRS7_MOUSE 26S proteasome regulatory subunit 7 OS=Mus musculus OX=10090 GN=Psmc2 PE=1 SV=5;tr|Q8BVQ9|Q8BVQ9_MOUSE 26S proteasome AAA-ATPase subunit RPT1 OS=Mus musculus OX=10090 GN=Psmc2 PE=1 SV=1	2	31	31	31	21	26	27	28	27	27	21	26	27	28	27	27	21	26	27	28	27	27	70.4	70.4	70.4	48.647	433	433;475	3.45	100	68	71	58	57	0	225.65	By MS/MS	By MS/MS	By MS/MS	By MS/MS	By MS/MS	By MS/MS
Q99PL5;A2AVJ7	Q99PL5;A2AVJ7	31;31	31;31	31;31	Ribosome-binding protein 1	Rrbp1	sp|Q99PL5|RRBP1_MOUSE Ribosome-binding protein 1 OS=Mus musculus OX=10090 GN=Rrbp1 PE=1 SV=2;tr|A2AVJ7|A2AVJ7_MOUSE Ribosome-binding protein 1 OS=Mus musculus OX=10090 GN=Rrbp1 PE=1 SV=1	2	31	31	31	28	26	27	29	28	27	28	26	27	29	28	27	28	26	27	29	28	27	21.9	21.9	21.9	172.88	1605	1605;1464	3.44	91	52	56	72	40	0	164.54	By MS/MS	By MS/MS	By MS/MS	By MS/MS	By MS/MS	By MS/MS
A2AKX3;F6R186;A0A0A0MQJ0	A2AKX3	31;4;1	31;4;1	30;3;1	Probable helicase senataxin	Setx	sp|A2AKX3|SETX_MOUSE Probable helicase senataxin OS=Mus musculus OX=10090 GN=Setx PE=1 SV=1	3	31	31	30	20	17	23	10	21	16	20	17	23	10	21	16	19	16	22	9	20	15	15.7	15.7	15.4	297.59	2646	2646;381;81	3.99	7	44	37	24	20	0	78.746	By MS/MS	By MS/MS	By MS/MS	By MS/MS	By MS/MS	By MS/MS
Q3URK3;E9Q9Y4;G3UZ35;G3UXI7	Q3URK3;E9Q9Y4	31;31;5;2	31;31;5;2	31;31;5;2	Methylcytosine dioxygenase TET1	Tet1	sp|Q3URK3|TET1_MOUSE Methylcytosine dioxygenase TET1 OS=Mus musculus OX=10090 GN=Tet1 PE=1 SV=2;tr|E9Q9Y4|E9Q9Y4_MOUSE Methylcytosine dioxygenase TET OS=Mus musculus OX=10090 GN=Tet1 PE=1 SV=1	4	31	31	31	28	24	30	23	23	22	28	24	30	23	23	22	28	24	30	23	23	22	22.1	22.1	22.1	219.26	2007	2007;2039;399;138	3.62	61	63	52	32	57	0	248.07	By MS/MS	By MS/MS	By MS/MS	By MS/MS	By MS/MS	By MS/MS
Q8C1A5;A0A0R4IZY0	Q8C1A5;A0A0R4IZY0	31;31	31;31	31;31	Thimet oligopeptidase	Thop1	sp|Q8C1A5|THOP1_MOUSE Thimet oligopeptidase OS=Mus musculus OX=10090 GN=Thop1 PE=1 SV=1;tr|A0A0R4IZY0|A0A0R4IZY0_MOUSE Thimet oligopeptidase OS=Mus musculus OX=10090 GN=Thop1 PE=1 SV=1	2	31	31	31	21	25	26	25	24	25	21	25	26	25	24	25	21	25	26	25	24	25	45.7	45.7	45.7	78.025	687	687;687	3.52	117	28	48	70	74	0	188.41	By MS/MS	By MS/MS	By MS/MS	By MS/MS	By MS/MS	By MS/MS
Q5SSZ5	Q5SSZ5	31	31	1	Tensin-3	Tns3	sp|Q5SSZ5|TENS3_MOUSE Tensin-3 OS=Mus musculus OX=10090 GN=Tns3 PE=1 SV=1	1	31	31	1	27	27	29	24	30	26	27	27	29	24	30	26	1	1	1	1	1	1	36.7	36.7	1	155.59	1440	1440	3.95	90	29	28	78	103	0	275.5	By MS/MS	By MS/MS	By MS/MS	By MS/MS	By MS/MS	By MS/MS
Q9Z1Z0;A0A0J9YUG0	Q9Z1Z0	31;2	31;2	31;2	General vesicular transport factor p115	Uso1	sp|Q9Z1Z0|USO1_MOUSE General vesicular transport factor p115 OS=Mus musculus OX=10090 GN=Uso1 PE=1 SV=2	2	31	31	31	20	18	21	25	22	23	20	18	21	25	22	23	20	18	21	25	22	23	40.4	40.4	40.4	106.98	959	959;74	3.34	64	64	72	33	26	0	233.54	By MS/MS	By MS/MS	By MS/MS	By MS/MS	By MS/MS	By MS/MS
Q8R5H1;A0A1W2P8B7	Q8R5H1	31;4	31;4	30;4	Ubiquitin carboxyl-terminal hydrolase 15	Usp15	sp|Q8R5H1|UBP15_MOUSE Ubiquitin carboxyl-terminal hydrolase 15 OS=Mus musculus OX=10090 GN=Usp15 PE=1 SV=1	2	31	31	30	21	19	25	23	28	23	21	19	25	23	28	23	21	19	24	23	27	23	37.8	37.8	36.9	112.32	981	981;138	3.81	57	24	44	47	53	0	122.4	By MS/MS	By MS/MS	By MS/MS	By MS/MS	By MS/MS	By MS/MS
A2A791;F6VYE2	A2A791;F6VYE2	31;24	31;24	31;24	Zinc finger MYM-type protein 4	Zmym4	sp|A2A791|ZMYM4_MOUSE Zinc finger MYM-type protein 4 OS=Mus musculus OX=10090 GN=Zmym4 PE=1 SV=1;tr|F6VYE2|F6VYE2_MOUSE Zinc finger MYM-type protein 4 (Fragment) OS=Mus musculus OX=10090 GN=Zmym4 PE=1 SV=1	2	31	31	31	26	21	25	14	20	22	26	21	25	14	20	22	26	21	25	14	20	22	26.9	26.9	26.9	172.44	1549	1549;1209	3.65	40	65	43	31	39	0	126.15	By MS/MS	By MS/MS	By MS/MS	By MS/MS	By MS/MS	By MS/MS
Q6P542	Q6P542	30	30	30	ATP-binding cassette sub-family F member 1	Abcf1	sp|Q6P542|ABCF1_MOUSE ATP-binding cassette sub-family F member 1 OS=Mus musculus OX=10090 GN=Abcf1 PE=1 SV=1	1	30	30	30	23	25	27	27	25	27	23	25	27	27	25	27	23	25	27	27	25	27	38.4	38.4	38.4	94.944	837	837	3.44	94	52	45	61	52	0	323.31	By MS/MS	By MS/MS	By MS/MS	By MS/MS	By MS/MS	By MS/MS
Q9JIF7	Q9JIF7	30	30	30	Coatomer subunit beta	Copb1	sp|Q9JIF7|COPB_MOUSE Coatomer subunit beta OS=Mus musculus OX=10090 GN=Copb1 PE=1 SV=1	1	30	30	30	16	26	23	20	19	19	16	26	23	20	19	19	16	26	23	20	19	19	38.5	38.5	38.5	107.06	953	953	3.94	64	10	47	69	59	0	193.86	By MS/MS	By MS/MS	By MS/MS	By MS/MS	By MS/MS	By MS/MS
P30999;E9Q8Z8;E9Q8Z6;G3X9V2;E9Q8Z9;E9Q904;E9Q901;D3Z2H2;E9Q8Z4;E9Q986;E9Q905;E9Q907;E9Q8Z5;D3Z7H6;E9Q903;E9Q906;D3Z2H7	P30999;E9Q8Z8;E9Q8Z6;G3X9V2;E9Q8Z9;E9Q904;E9Q901;D3Z2H2;E9Q8Z4;E9Q986;E9Q905;E9Q907;E9Q8Z5;D3Z7H6;E9Q903;E9Q906;D3Z2H7	30;30;30;30;29;29;29;29;29;28;28;28;28;28;27;26;23	30;30;30;30;29;29;29;29;29;28;28;28;28;28;27;26;23	30;30;30;30;29;29;29;29;29;28;28;28;28;28;27;26;23	Catenin delta-1	Ctnnd1	sp|P30999|CTND1_MOUSE Catenin delta-1 OS=Mus musculus OX=10090 GN=Ctnnd1 PE=1 SV=2;tr|E9Q8Z8|E9Q8Z8_MOUSE Catenin delta-1 OS=Mus musculus OX=10090 GN=Ctnnd1 PE=1 SV=1;tr|E9Q8Z6|E9Q8Z6_MOUSE Catenin delta-1 OS=Mus musculus OX=10090 GN=Ctnnd1 PE=1 SV=1;tr|G3	17	30	30	30	20	21	29	21	18	16	20	21	29	21	18	16	20	21	29	21	18	16	41.2	41.2	41.2	104.92	938	938;967;961;932;878;913;907;884;868;830;866;860;940;837;892;839;609	3.49	93	8	39	54	53	0	185.92	By MS/MS	By MS/MS	By MS/MS	By MS/MS	By MS/MS	By MS/MS
Q8K363;F6ZX28	Q8K363	30;8	30;8	30;8	ATP-dependent RNA helicase DDX18	Ddx18	sp|Q8K363|DDX18_MOUSE ATP-dependent RNA helicase DDX18 OS=Mus musculus OX=10090 GN=Ddx18 PE=1 SV=1	2	30	30	30	20	21	26	23	21	23	20	21	26	23	21	23	20	21	26	23	21	23	53	53	53	74.18	660	660;171	3.09	121	66	50	43	45	0	323.31	By MS/MS	By MS/MS	By MS/MS	By MS/MS	By MS/MS	By MS/MS
Q9Z1N5;G3UXI6	Q9Z1N5	30;12	30;12	17;7	Spliceosome RNA helicase Ddx39b	Ddx39b	sp|Q9Z1N5|DX39B_MOUSE Spliceosome RNA helicase Ddx39b OS=Mus musculus OX=10090 GN=Ddx39b PE=1 SV=1	2	30	30	17	23	28	30	27	23	21	23	28	30	27	23	21	13	15	17	14	11	12	72.9	72.9	47.7	49.035	428	428;148	3.5	237	65	120	103	163	0	323.31	By MS/MS	By MS/MS	By MS/MS	By MS/MS	By MS/MS	By MS/MS
Q9WVK4	Q9WVK4	30	30	21	EH domain-containing protein 1	Ehd1	sp|Q9WVK4|EHD1_MOUSE EH domain-containing protein 1 OS=Mus musculus OX=10090 GN=Ehd1 PE=1 SV=1	1	30	30	21	20	23	22	25	24	21	20	23	22	25	24	21	15	16	15	17	19	16	68.2	68.2	51.3	60.602	534	534	3.58	118	43	84	76	77	0	247.5	By MS/MS	By MS/MS	By MS/MS	By MS/MS	By MS/MS	By MS/MS
Q69ZK6;G3UZM1;A0A0A0MQ98;G3UYW3	Q69ZK6;G3UZM1;A0A0A0MQ98	30;30;30;5	30;30;30;5	30;30;30;5	Probable JmjC domain-containing histone demethylation protein 2C	Jmjd1c	sp|Q69ZK6|JHD2C_MOUSE Probable JmjC domain-containing histone demethylation protein 2C OS=Mus musculus OX=10090 GN=Jmjd1c PE=1 SV=3;tr|G3UZM1|G3UZM1_MOUSE Probable JmjC domain-containing histone demethylation protein 2C OS=Mus musculus OX=10090 GN=Jmjd1c P	4	30	30	30	22	19	27	17	24	22	22	19	27	17	24	22	22	19	27	17	24	22	18.6	18.6	18.6	260.64	2350	2350;2531;2530;744	3.97	23	36	50	28	36	0	115.91	By MS/MS	By MS/MS	By MS/MS	By MS/MS	By MS/MS	By MS/MS
A0A087WS29;A0A087WQQ5	A0A087WS29;A0A087WQQ5	30;30	1;1	0;0		Ktn1	tr|A0A087WS29|A0A087WS29_MOUSE Kinectin OS=Mus musculus OX=10090 GN=Ktn1 PE=1 SV=1;tr|A0A087WQQ5|A0A087WQQ5_MOUSE Kinectin OS=Mus musculus OX=10090 GN=Ktn1 PE=1 SV=1	2	30	1	0	22	18	24	22	22	21	1	1	1	1	1	1	0	0	0	0	0	0	32.6	1.9	0	140.92	1228	1228;1275	3		7				0	16.697	By MS/MS	By MS/MS	By MS/MS	By MS/MS	By MS/MS	By matching
Q3V3R1	Q3V3R1	30	29	29	Monofunctional C1-tetrahydrofolate synthase, mitochondrial	Mthfd1l	sp|Q3V3R1|C1TM_MOUSE Monofunctional C1-tetrahydrofolate synthase, mitochondrial OS=Mus musculus OX=10090 GN=Mthfd1l PE=1 SV=2	1	30	29	29	22	23	27	27	27	27	22	22	26	26	26	26	22	22	26	26	26	26	42.9	41.8	41.8	105.73	977	977	3.26	117	29	42	39	63	0	131.45	By MS/MS	By MS/MS	By MS/MS	By MS/MS	By MS/MS	By MS/MS
Q8R0G9	Q8R0G9	30	30	30	Nuclear pore complex protein Nup133	Nup133	sp|Q8R0G9|NU133_MOUSE Nuclear pore complex protein Nup133 OS=Mus musculus OX=10090 GN=Nup133 PE=1 SV=2	1	30	30	30	20	23	24	20	23	21	20	23	24	20	23	21	20	23	24	20	23	21	35	35	35	128.62	1155	1155	3.61	67	20	36	39	50	0	168.95	By MS/MS	By MS/MS	By MS/MS	By MS/MS	By MS/MS	By MS/MS
Q9DBY8	Q9DBY8	30	30	30	Nuclear valosin-containing protein-like	Nvl	sp|Q9DBY8|NVL_MOUSE Nuclear valosin-containing protein-like OS=Mus musculus OX=10090 GN=Nvl PE=1 SV=1	1	30	30	30	21	21	25	23	21	23	21	21	25	23	21	23	21	21	25	23	21	23	45.3	45.3	45.3	94.475	855	855	3.29	106	38	54	37	56	0	110.72	By MS/MS	By MS/MS	By MS/MS	By MS/MS	By MS/MS	By MS/MS
Q9R0L6;A0A1B0GT33	Q9R0L6	30;1	30;1	30;1	Pericentriolar material 1 protein	Pcm1	sp|Q9R0L6|PCM1_MOUSE Pericentriolar material 1 protein OS=Mus musculus OX=10090 GN=Pcm1 PE=1 SV=2	2	30	30	30	20	18	24	19	18	19	20	18	24	19	18	19	20	18	24	19	18	19	19	19	19	228.84	2025	2025;157	3.41	41	51	48	31	16	0	126.14	By MS/MS	By MS/MS	By MS/MS	By MS/MS	By MS/MS	By MS/MS
P09411;S4R2M7	P09411;S4R2M7	30;18	30;18	25;14	Phosphoglycerate kinase 1;Phosphoglycerate kinase	Pgk1	sp|P09411|PGK1_MOUSE Phosphoglycerate kinase 1 OS=Mus musculus OX=10090 GN=Pgk1 PE=1 SV=4;tr|S4R2M7|S4R2M7_MOUSE Phosphoglycerate kinase OS=Mus musculus OX=10090 GN=Pgk1 PE=1 SV=1	2	30	30	25	28	27	27	29	27	28	28	27	27	29	27	28	24	22	23	24	24	24	79.9	79.9	71.7	44.55	417	417;255	3.63	279	153	224	167	220	0	323.31	By MS/MS	By MS/MS	By MS/MS	By MS/MS	By MS/MS	By MS/MS
Q8CFI7	Q8CFI7	30	30	30	DNA-directed RNA polymerase II subunit RPB2	Polr2b	sp|Q8CFI7|RPB2_MOUSE DNA-directed RNA polymerase II subunit RPB2 OS=Mus musculus OX=10090 GN=Polr2b PE=1 SV=2	1	30	30	30	19	21	24	19	19	18	19	21	24	19	19	18	19	21	24	19	19	18	29.4	29.4	29.4	133.91	1174	1174	3.71	66	12	38	43	53	0	145.43	By MS/MS	By MS/MS	By MS/MS	By MS/MS	By MS/MS	By MS/MS
Q60520;E9PXF9	Q60520	30;3	30;3	29;3	Paired amphipathic helix protein Sin3a	Sin3a	sp|Q60520|SIN3A_MOUSE Paired amphipathic helix protein Sin3a OS=Mus musculus OX=10090 GN=Sin3a PE=1 SV=3	2	30	30	29	23	27	26	20	16	15	23	27	26	20	16	15	22	26	25	20	15	15	30.7	30.7	28.8	145.09	1274	1274;133	3.64	85	25	33	54	66	0	199.93	By MS/MS	By MS/MS	By MS/MS	By MS/MS	By MS/MS	By MS/MS
Q8CGF7;A0A494B9W7;A0A494BA28;A0A494BAT6	Q8CGF7;A0A494B9W7	30;18;8;2	30;18;8;2	29;17;8;2	Transcription elongation regulator 1	Tcerg1	sp|Q8CGF7|TCRG1_MOUSE Transcription elongation regulator 1 OS=Mus musculus OX=10090 GN=Tcerg1 PE=1 SV=2;tr|A0A494B9W7|A0A494B9W7_MOUSE Transcription elongation regulator 1 (Fragment) OS=Mus musculus OX=10090 GN=Tcerg1 PE=1 SV=1	4	30	30	29	21	24	25	21	23	21	21	24	25	21	23	21	20	24	24	21	22	20	33.2	33.2	32.3	123.79	1100	1100;779;193;61	3.53	80	41	47	76	37	0	116.42	By MS/MS	By MS/MS	By MS/MS	By MS/MS	By MS/MS	By MS/MS
Q7TMM9	Q7TMM9	30	1	1	Tubulin beta-2A chain	Tubb2a	sp|Q7TMM9|TBB2A_MOUSE Tubulin beta-2A chain OS=Mus musculus OX=10090 GN=Tubb2a PE=1 SV=1	1	30	1	1	29	30	29	30	28	28	1	1	1	1	1	1	1	1	1	1	1	1	71.7	2.7	2.7	49.906	445	445	2.5	6		6			0	8.4557	By MS/MS	By MS/MS	By MS/MS	By MS/MS	By MS/MS	By MS/MS
Q9ES00;A0A571BD95;A0A5F8MP95;G3UZD6;G3UZM6;H7BXC2	Q9ES00;A0A571BD95;A0A5F8MP95;G3UZD6	30;30;30;23;5;4	30;30;30;23;5;4	30;30;30;23;5;4	Ubiquitin conjugation factor E4 B	Ube4b	sp|Q9ES00|UBE4B_MOUSE Ubiquitin conjugation factor E4 B OS=Mus musculus OX=10090 GN=Ube4b PE=1 SV=3;tr|A0A571BD95|A0A571BD95_MOUSE Ubiquitin conjugation factor E4 B OS=Mus musculus OX=10090 GN=Ube4b PE=1 SV=1;tr|A0A5F8MP95|A0A5F8MP95_MOUSE Ubiquitin conjug	6	30	30	30	17	23	26	25	17	21	17	23	26	25	17	21	17	23	26	25	17	21	33	33	33	133.32	1173	1173;1307;1353;998;409;128	3.94	58	21	40	40	71	0	156.44	By MS/MS	By MS/MS	By MS/MS	By MS/MS	By MS/MS	By MS/MS
A2ALR9;A2ALR5;F6VSP0;F7ALR2;F6TH61;F6VSQ9;F6Z2T3;A2BDP2	A2ALR9	30;5;4;3;3;1;1;1	30;5;4;3;3;1;1;1	0;0;0;0;0;0;0;0		Usp48	tr|A2ALR9|A2ALR9_MOUSE Ubiquitinyl hydrolase 1 OS=Mus musculus OX=10090 GN=Usp48 PE=1 SV=1	8	30	30	0	25	25	28	24	22	24	25	25	28	24	22	24	0	0	0	0	0	0	40.8	40.8	0	118.77	1036	1036;267;156;113;123;85;87;165	3.61	110	16	22	76	77	0	323.31	By MS/MS	By MS/MS	By MS/MS	By MS/MS	By MS/MS	By MS/MS
Q3V0C5;F6TGT8;A2ALS8	Q3V0C5	30;6;1	2;1;1	1;0;0	Ubiquitin carboxyl-terminal hydrolase 48	Usp48	sp|Q3V0C5|UBP48_MOUSE Ubiquitin carboxyl-terminal hydrolase 48 OS=Mus musculus OX=10090 GN=Usp48 PE=1 SV=2	3	30	2	1	24	25	29	25	23	25	1	1	2	2	2	1	0	1	1	1	1	0	40.9	2.1	1.3	120.63	1052	1052;170;105	5				10		0.0013734	3.0833	By MS/MS	By MS/MS	By MS/MS	By MS/MS	By MS/MS	By MS/MS
P56399;Q3U4W8;D3Z4K7;D3YYA5	P56399;Q3U4W8	30;30;7;6	30;30;7;6	30;30;7;6	Ubiquitin carboxyl-terminal hydrolase 5;Ubiquitin carboxyl-terminal hydrolase	Usp5	sp|P56399|UBP5_MOUSE Ubiquitin carboxyl-terminal hydrolase 5 OS=Mus musculus OX=10090 GN=Usp5 PE=1 SV=1;tr|Q3U4W8|Q3U4W8_MOUSE Ubiquitin carboxyl-terminal hydrolase OS=Mus musculus OX=10090 GN=Usp5 PE=1 SV=1	4	30	30	30	26	21	26	21	24	25	26	21	26	21	24	25	26	21	26	21	24	25	41.1	41.1	41.1	95.832	858	858;835;303;209	3.56	93	47	36	32	83	0	296.73	By MS/MS	By MS/MS	By MS/MS	By MS/MS	By MS/MS	By MS/MS
Q6NZF1;A0A0A6YXI9;A0A0A6YXN6;A0A0A6YWW2;A0A0A6YX41;A0A0A6YX93	Q6NZF1	30;7;4;3;1;1	30;7;4;3;1;1	30;7;4;3;1;1	Zinc finger CCCH domain-containing protein 11A	Zc3h11a	sp|Q6NZF1|ZC11A_MOUSE Zinc finger CCCH domain-containing protein 11A OS=Mus musculus OX=10090 GN=Zc3h11a PE=1 SV=1	6	30	30	30	26	20	27	22	27	23	26	20	27	22	27	23	26	20	27	22	27	23	50.1	50.1	50.1	86.491	792	792;194;189;133;40;84	3.32	85	55	46	46	40	0	184.81	By MS/MS	By MS/MS	By MS/MS	By MS/MS	By MS/MS	By MS/MS
P50247;A2ALT5	P50247	29;6	29;6	29;6	Adenosylhomocysteinase	Ahcy	sp|P50247|SAHH_MOUSE Adenosylhomocysteinase OS=Mus musculus OX=10090 GN=Ahcy PE=1 SV=3	2	29	29	29	18	24	26	27	26	25	18	24	26	27	26	25	18	24	26	27	26	25	69	69	69	47.688	432	432;95	3.38	163	30	77	85	81	0	310.2	By MS/MS	By MS/MS	By MS/MS	By MS/MS	By MS/MS	By MS/MS
P47738;A0A0G2JEU1;A0A0G2JFQ0;A0A0G2JF60;D3YYF3;Q62148;P24549	P47738;A0A0G2JEU1	29;27;12;11;7;2;1	29;27;12;11;7;2;1	28;26;12;11;7;1;0	Aldehyde dehydrogenase, mitochondrial	Aldh2	sp|P47738|ALDH2_MOUSE Aldehyde dehydrogenase, mitochondrial OS=Mus musculus OX=10090 GN=Aldh2 PE=1 SV=1;tr|A0A0G2JEU1|A0A0G2JEU1_MOUSE Aldehyde dehydrogenase, mitochondrial OS=Mus musculus OX=10090 GN=Aldh2 PE=1 SV=1	7	29	29	28	21	27	28	22	24	21	21	27	28	22	24	21	21	26	28	22	24	21	62.4	62.4	60.9	56.537	519	519;471;229;196;185;518;501	3.64	141	28	80	105	92	0	323.31	By MS/MS	By MS/MS	By MS/MS	By MS/MS	By MS/MS	By MS/MS
P40201;Q8C7Q2;G3V014;G3UWS6;G3UXJ4	P40201;Q8C7Q2	29;20;13;5;1	29;20;13;5;1	25;17;10;5;0	Chromodomain-helicase-DNA-binding protein 1	Chd1	sp|P40201|CHD1_MOUSE Chromodomain-helicase-DNA-binding protein 1 OS=Mus musculus OX=10090 GN=Chd1 PE=1 SV=3;tr|Q8C7Q2|Q8C7Q2_MOUSE DNA helicase OS=Mus musculus OX=10090 GN=Chd1 PE=1 SV=1	5	29	29	25	18	15	24	17	24	20	18	15	24	17	24	20	15	13	21	15	20	18	19.4	19.4	17	196.38	1711	1711;1081;516;164;163	4.05	43	18	44	30	63	0	102.49	By MS/MS	By MS/MS	By MS/MS	By MS/MS	By MS/MS	By MS/MS
A0A0R4J140;Q5SW19;Z4YLI8	A0A0R4J140;Q5SW19;Z4YLI8	29;27;25	29;27;25	29;27;25	Clustered mitochondria protein homolog	Cluh	tr|A0A0R4J140|A0A0R4J140_MOUSE Clustered mitochondria protein homolog OS=Mus musculus OX=10090 GN=Cluh PE=1 SV=1;sp|Q5SW19|CLU_MOUSE Clustered mitochondria protein homolog OS=Mus musculus OX=10090 GN=Cluh PE=1 SV=2;tr|Z4YLI8|Z4YLI8_MOUSE Clustered mitochon	3	29	29	29	19	17	23	18	27	24	19	17	23	18	27	24	19	17	23	18	27	24	29.4	29.4	29.4	151.83	1353	1353;1315;1302	3.62	58	28	54	41	39	0	161.38	By MS/MS	By MS/MS	By MS/MS	By MS/MS	By MS/MS	By MS/MS
Q8R1B4;M0QWV3	Q8R1B4	29;4	29;4	29;4	Eukaryotic translation initiation factor 3 subunit C	Eif3c	sp|Q8R1B4|EIF3C_MOUSE Eukaryotic translation initiation factor 3 subunit C OS=Mus musculus OX=10090 GN=Eif3c PE=1 SV=1	2	29	29	29	15	23	23	25	22	19	15	23	23	25	22	19	15	23	23	25	22	19	34.1	34.1	34.1	105.53	911	911;249	3.46	110	28	74	84	45	0	255.33	By MS/MS	By MS/MS	By MS/MS	By MS/MS	By MS/MS	By MS/MS
Q8QZY1;A0A2R8VH97	Q8QZY1	29;3	29;3	29;3	Eukaryotic translation initiation factor 3 subunit L	Eif3l	sp|Q8QZY1|EIF3L_MOUSE Eukaryotic translation initiation factor 3 subunit L OS=Mus musculus OX=10090 GN=Eif3l PE=1 SV=1	2	29	29	29	19	24	27	29	26	26	19	24	27	29	26	26	19	24	27	29	26	26	55.1	55.1	55.1	66.612	564	564;44	3.44	135	21	84	78	66	0	323.31	By MS/MS	By MS/MS	By MS/MS	By MS/MS	By MS/MS	By MS/MS
Q3THK7	Q3THK7	29	29	29	GMP synthase [glutamine-hydrolyzing]	Gmps	sp|Q3THK7|GUAA_MOUSE GMP synthase [glutamine-hydrolyzing] OS=Mus musculus OX=10090 GN=Gmps PE=1 SV=2	1	29	29	29	26	26	24	25	27	27	26	26	24	25	27	27	26	26	24	25	27	27	56.9	56.9	56.9	76.723	693	693	3.48	135	34	84	79	75	0	277.59	By MS/MS	By MS/MS	By MS/MS	By MS/MS	By MS/MS	By MS/MS
Q91VW5;A0A1D5RLV4;A0A1D5RME8;A0A1D5RLC6;A0A1D5RM19;A0A1D5RLH4	Q91VW5;A0A1D5RLV4	29;17;12;5;2;1	29;17;12;5;2;1	29;17;12;5;2;1	Golgin subfamily A member 4	Golga4	sp|Q91VW5|GOGA4_MOUSE Golgin subfamily A member 4 OS=Mus musculus OX=10090 GN=Golga4 PE=1 SV=2;tr|A0A1D5RLV4|A0A1D5RLV4_MOUSE Golgin subfamily A member 4 (Fragment) OS=Mus musculus OX=10090 GN=Golga4 PE=1 SV=1	6	29	29	29	22	20	24	11	23	20	22	20	24	11	23	20	22	20	24	11	23	20	15.9	15.9	15.9	257.56	2238	2238;1251;941;454;111;131	3.86	8	44	45	27	11	0	110.53	By MS/MS	By MS/MS	By MS/MS	By MS/MS	By MS/MS	By MS/MS
Q8K310;A0A494BAZ7;A0A494BAD4;A0A494B9X1;A0A494BAZ2;A0A494BAL7;A0A494BAC5;A0A494B9B1;A0A494B968;A0A494B9C9;A0A494B8Y5;A0A494B9Q4	Q8K310;A0A494BAZ7;A0A494BAD4	29;20;20;13;9;5;4;3;1;1;1;1	29;20;20;13;9;5;4;3;1;1;1;1	29;20;20;13;9;5;4;3;1;1;1;1	Matrin-3	Matr3	sp|Q8K310|MATR3_MOUSE Matrin-3 OS=Mus musculus OX=10090 GN=Matr3 PE=1 SV=1;tr|A0A494BAZ7|A0A494BAZ7_MOUSE Matrin-3 OS=Mus musculus OX=10090 GN=Matr3 PE=1 SV=1;tr|A0A494BAD4|A0A494BAD4_MOUSE Matrin-3 OS=Mus musculus OX=10090 GN=Matr3 PE=1 SV=1	12	29	29	29	21	25	26	23	22	21	21	25	26	23	22	21	21	25	26	23	22	21	42.1	42.1	42.1	94.629	846	846;508;558;403;385;102;121;155;60;61;87;91	3.29	143	34	57	40	84	0	323.31	By MS/MS	By MS/MS	By MS/MS	By MS/MS	By MS/MS	By MS/MS
Q69ZN7;E9Q390;A0A286YDF5;A0A286YCZ3	Q69ZN7;E9Q390;A0A286YDF5;A0A286YCZ3	29;29;29;18	29;29;29;18	28;28;28;18	Myoferlin	Myof	sp|Q69ZN7|MYOF_MOUSE Myoferlin OS=Mus musculus OX=10090 GN=Myof PE=1 SV=2;tr|E9Q390|E9Q390_MOUSE Myoferlin OS=Mus musculus OX=10090 GN=Myof PE=1 SV=2;tr|A0A286YDF5|A0A286YDF5_MOUSE Myoferlin OS=Mus musculus OX=10090 GN=Myof PE=1 SV=1;tr|A0A286YCZ3|A0A286YC	4	29	29	28	21	19	26	9	10	15	21	19	26	9	10	15	21	19	26	8	10	15	17.4	17.4	17.4	233.32	2048	2048;2048;2061;1307	4.42	11	21	28	28	40	0	93.009	By MS/MS	By MS/MS	By MS/MS	By MS/MS	By MS/MS	By MS/MS
Q8BJ71;A0A1D5RLQ0;A0A1D5RM86	Q8BJ71;A0A1D5RLQ0	29;21;1	29;21;1	29;21;1	Nuclear pore complex protein Nup93	Nup93	sp|Q8BJ71|NUP93_MOUSE Nuclear pore complex protein Nup93 OS=Mus musculus OX=10090 GN=Nup93 PE=1 SV=1;tr|A0A1D5RLQ0|A0A1D5RLQ0_MOUSE Nuclear pore complex protein Nup93 OS=Mus musculus OX=10090 GN=Nup93 PE=1 SV=1	3	29	29	29	21	26	25	25	24	22	21	26	25	25	24	22	21	26	25	25	24	22	39.3	39.3	39.3	93.28	819	819;699;18	3.61	92	47	64	50	73	0	151.22	By MS/MS	By MS/MS	By MS/MS	By MS/MS	By MS/MS	By MS/MS
Q6PHQ9;Q91YZ8;A3KFU5;A3KFU8;V9GXG3	Q6PHQ9;Q91YZ8;A3KFU5;A3KFU8	29;29;29;29;10	17;17;17;17;5	16;16;16;16;4	Polyadenylate-binding protein	Pabpc4	tr|Q6PHQ9|Q6PHQ9_MOUSE Polyadenylate-binding protein OS=Mus musculus OX=10090 GN=Pabpc4 PE=1 SV=1;tr|Q91YZ8|Q91YZ8_MOUSE Polyadenylate-binding protein OS=Mus musculus OX=10090 GN=Pabpc4 PE=1 SV=1;tr|A3KFU5|A3KFU5_MOUSE Polyadenylate-binding protein OS=Mus	5	29	17	16	25	27	27	29	29	27	14	15	15	17	17	15	13	14	14	16	16	14	46.2	30.3	28.9	72.242	660	660;615;631;644;168	3.69	78	29	22	31	79	0	101.7	By MS/MS	By MS/MS	By MS/MS	By MS/MS	By MS/MS	By MS/MS
Q8K411	Q8K411	29	29	29	Presequence protease, mitochondrial	Pitrm1	sp|Q8K411|PREP_MOUSE Presequence protease, mitochondrial OS=Mus musculus OX=10090 GN=Pitrm1 PE=1 SV=1	1	29	29	29	23	22	24	18	22	22	23	22	24	18	22	22	23	22	24	18	22	22	43.5	43.5	43.5	117.37	1036	1036	3.4	98	34	61	54	48	0	134.54	By MS/MS	By MS/MS	By MS/MS	By MS/MS	By MS/MS	By MS/MS
Q8BG32;G3UYH2;G3UXL5;G3UWW7;G3UYI4;G3UYL3;G3UYL8;G3UX15;G3UZ28;G3UX67;G3UWV7;G3UZ33	Q8BG32;G3UYH2	29;15;13;12;9;9;7;7;6;4;4;4	29;15;13;12;9;9;7;7;6;4;4;4	29;15;13;12;9;9;7;7;6;4;4;4	26S proteasome non-ATPase regulatory subunit 11	Psmd11	sp|Q8BG32|PSD11_MOUSE 26S proteasome non-ATPase regulatory subunit 11 OS=Mus musculus OX=10090 GN=Psmd11 PE=1 SV=3;tr|G3UYH2|G3UYH2_MOUSE 26S proteasome non-ATPase regulatory subunit 11 (Fragment) OS=Mus musculus OX=10090 GN=Psmd11 PE=1 SV=1	12	29	29	29	23	28	25	27	26	25	23	28	25	27	26	25	23	28	25	27	26	25	68.2	68.2	68.2	47.436	422	422;209;160;158;113;116;100;100;95;67;89;114	3.57	124	31	72	68	86	0	323.31	By MS/MS	By MS/MS	By MS/MS	By MS/MS	By MS/MS	By MS/MS
Q505N6;P18653;F6Q8A4;E9PWV3;F6RQA2;G3UZI3;B1AXP0;B1AXN5;A0A338P701;B1AXN8;F6UG16;E9Q6Q5;A0A668KLF8;E9QPR4;E9PWX8;E9QLW6;B1AST7;B1AST8;A0A668KL31;A0A1D5RM97;E9Q1Q1;Q9R1L5;E9Q1M8;E9Q6G0;E9Q4Q9;Q60592;Q3U214;Q811L6	Q505N6;P18653;F6Q8A4;E9PWV3;F6RQA2;G3UZI3	29;29;27;27;27;25;6;4;4;3;2;1;1;1;1;1;1;1;1;1;1;1;1;1;1;1;1;1	29;29;27;27;27;25;6;4;4;3;2;1;1;1;1;1;1;1;1;1;1;1;1;1;1;1;1;1	20;20;18;18;18;18;0;0;0;0;0;0;0;0;0;0;0;0;0;0;0;0;0;0;0;0;0;0	Ribosomal protein S6 kinase;Ribosomal protein S6 kinase alpha-1	Rps6ka1	tr|Q505N6|Q505N6_MOUSE Ribosomal protein S6 kinase OS=Mus musculus OX=10090 GN=Rps6ka1 PE=1 SV=1;sp|P18653|KS6A1_MOUSE Ribosomal protein S6 kinase alpha-1 OS=Mus musculus OX=10090 GN=Rps6ka1 PE=1 SV=1;tr|F6Q8A4|F6Q8A4_MOUSE Non-specific serine/threonine pr	28	29	29	20	21	20	24	20	22	23	21	20	24	20	22	23	13	12	17	13	14	15	46	46	32.5	82.845	735	735;724;741;719;736;625;211;172;223;135;129;658;1642;2441;2426;1794;1739;1733;1714;1305;1800;1570;1210;868;993;1734;1321;2618	3.77	73	34	36	46	73	0	149.34	By MS/MS	By MS/MS	By MS/MS	By MS/MS	By MS/MS	By MS/MS
P07742;A0A1B0GSB1	P07742	29;4	29;4	29;4	Ribonucleoside-diphosphate reductase large subunit	Rrm1	sp|P07742|RIR1_MOUSE Ribonucleoside-diphosphate reductase large subunit OS=Mus musculus OX=10090 GN=Rrm1 PE=1 SV=2	2	29	29	29	22	22	24	28	29	28	22	22	24	28	29	28	22	22	24	28	29	28	53.3	53.3	53.3	90.209	792	792;65	3.59	132	33	39	66	104	0	323.31	By MS/MS	By MS/MS	By MS/MS	By MS/MS	By MS/MS	By MS/MS
Q99P72	Q99P72	29	29	29	Reticulon-4	Rtn4	sp|Q99P72|RTN4_MOUSE Reticulon-4 OS=Mus musculus OX=10090 GN=Rtn4 PE=1 SV=2	1	29	29	29	23	20	25	20	23	24	23	20	25	20	23	24	23	20	25	20	23	24	43.6	43.6	43.6	126.61	1162	1162	3	94	79	46	22	33	0	323.31	By MS/MS	By MS/MS	By MS/MS	By MS/MS	By MS/MS	By MS/MS
Q9WTM5;A0A1B0GSR4;A0A1B0GT54;A0A1B0GRW3;A0A1B0GR89;A0A1B0GRT1	Q9WTM5;A0A1B0GSR4	29;15;12;12;5;2	29;15;12;12;5;2	29;15;12;12;5;2	RuvB-like 2	Ruvbl2	sp|Q9WTM5|RUVB2_MOUSE RuvB-like 2 OS=Mus musculus OX=10090 GN=Ruvbl2 PE=1 SV=3;tr|A0A1B0GSR4|A0A1B0GSR4_MOUSE RuvB-like helicase (Fragment) OS=Mus musculus OX=10090 GN=Ruvbl2 PE=1 SV=1	6	29	29	29	18	26	22	26	20	19	18	26	22	26	20	19	18	26	22	26	20	19	65.7	65.7	65.7	51.112	463	463;221;134;237;104;48	3.07	122	42	60	51	35	0	179.3	By MS/MS	By MS/MS	By MS/MS	By MS/MS	By MS/MS	By MS/MS
Q8BX22;A2AUZ7;A2AUZ6	Q8BX22	29;8;1	29;8;1	28;8;1	Sal-like protein 4	Sall4	sp|Q8BX22|SALL4_MOUSE Sal-like protein 4 OS=Mus musculus OX=10090 GN=Sall4 PE=1 SV=2	3	29	29	28	23	25	26	23	26	26	23	25	26	23	26	26	22	24	25	22	25	25	42.6	42.6	41.7	113.11	1067	1067;215;131	3.22	139	53	86	71	46	0	323.31	By MS/MS	By MS/MS	By MS/MS	By MS/MS	By MS/MS	By MS/MS
Q3UPL0;S4R2A9;S4R256;S4R1T5;S4R1Y8	Q3UPL0;S4R2A9	29;22;9;4;2	29;22;9;4;2	21;15;9;4;2	Protein transport protein Sec31A	Sec31a	sp|Q3UPL0|SC31A_MOUSE Protein transport protein Sec31A OS=Mus musculus OX=10090 GN=Sec31a PE=1 SV=2;tr|S4R2A9|S4R2A9_MOUSE Protein transport protein Sec31A (Fragment) OS=Mus musculus OX=10090 GN=Sec31a PE=1 SV=1	5	29	29	21	18	20	21	21	23	24	18	20	21	21	23	24	12	13	15	15	15	17	30.6	30.6	24.8	133.57	1230	1230;934;364;264;296	3.47	77	8	46	27	51	0	181.6	By MS/MS	By MS/MS	By MS/MS	By MS/MS	By MS/MS	By MS/MS
Q99MR6;A0A0G2JDF8;A0A0G2JG65;A0A0G2JDN3;A0A0G2JDF1;A0A1Y7VNN4	Q99MR6;A0A0G2JDF8	29;19;9;6;3;2	29;19;9;6;3;2	29;19;9;6;3;2	Serrate RNA effector molecule homolog	Srrt	sp|Q99MR6|SRRT_MOUSE Serrate RNA effector molecule homolog OS=Mus musculus OX=10090 GN=Srrt PE=1 SV=1;tr|A0A0G2JDF8|A0A0G2JDF8_MOUSE Arsenite-resistance protein 2 (Fragment) OS=Mus musculus OX=10090 GN=Srrt PE=1 SV=1	6	29	29	29	28	26	28	24	26	24	28	26	28	24	26	24	28	26	28	24	26	24	34.9	34.9	34.9	100.45	875	875;517;269;467;239;63	3.29	126	34	57	56	60	0	198.84	By MS/MS	By MS/MS	By MS/MS	By MS/MS	By MS/MS	By MS/MS
O55201;A0A140LJ34	O55201	29;6	29;6	29;6	Transcription elongation factor SPT5	Supt5h	sp|O55201|SPT5H_MOUSE Transcription elongation factor SPT5 OS=Mus musculus OX=10090 GN=Supt5h PE=1 SV=1	2	29	29	29	24	19	23	18	25	22	24	19	23	18	25	22	24	19	23	18	25	22	33.1	33.1	33.1	120.66	1082	1082;149	3.74	84	19	60	76	59	0	244.28	By MS/MS	By MS/MS	By MS/MS	By MS/MS	By MS/MS	By MS/MS
A0A0R4J259;G3UZI2;G3UZ48;G3UXJ6;G3UWM1;G3XA76;G3UXU5;G3UY67;G3UYK7	A0A0R4J259;G3UZI2;G3UZ48;G3UXJ6	29;28;24;22;11;4;2;1;1	1;1;1;1;0;0;0;1;1	1;1;1;1;0;0;0;1;1		Syncrip	tr|A0A0R4J259|A0A0R4J259_MOUSE Heterogeneous nuclear ribonucleoprotein Q OS=Mus musculus OX=10090 GN=Syncrip PE=1 SV=1;tr|G3UZI2|G3UZI2_MOUSE Heterogeneous nuclear ribonucleoprotein Q OS=Mus musculus OX=10090 GN=Syncrip PE=1 SV=1;tr|G3UZ48|G3UZ48_MOUSE Het	9	29	1	1	24	24	28	27	27	24	1	1	1	1	1	1	1	1	1	1	1	1	54.9	1.8	1.8	62.543	561	561;527;464;448;196;94;67;59;97	2.58	4	15				0	4.1667	By MS/MS	By MS/MS	By MS/MS	By MS/MS	By MS/MS	By MS/MS
Q7TMK9;G3V018	Q7TMK9;G3V018	29;28	29;28	1;1	Heterogeneous nuclear ribonucleoprotein Q	Syncrip	sp|Q7TMK9|HNRPQ_MOUSE Heterogeneous nuclear ribonucleoprotein Q OS=Mus musculus OX=10090 GN=Syncrip PE=1 SV=2;tr|G3V018|G3V018_MOUSE Heterogeneous nuclear ribonucleoprotein Q OS=Mus musculus OX=10090 GN=Syncrip PE=1 SV=1	2	29	29	1	24	24	28	27	27	24	24	24	28	27	27	24	1	1	1	1	1	1	50.4	50.4	2.6	69.632	623	623;588	3.61	181	16	145	120	109	0	323.31	By MS/MS	By MS/MS	By MS/MS	By MS/MS	By MS/MS	By MS/MS
B1AZI6;Q8C690;B8A4C2;F6VK25;F6SBF2	B1AZI6	29;2;1;1;1	29;2;1;1;1	16;2;1;1;1	THO complex subunit 2	Thoc2	sp|B1AZI6|THOC2_MOUSE THO complex subunit 2 OS=Mus musculus OX=10090 GN=Thoc2 PE=1 SV=1	5	29	29	16	22	19	23	15	20	17	22	19	23	15	20	17	11	11	13	7	11	9	21.3	21.3	12	182.77	1594	1594;232;109;117;165	4.09	41	30	22	30	70	0	84.717	By MS/MS	By MS/MS	By MS/MS	By MS/MS	By MS/MS	By MS/MS
Q8BFY9;Q3TKD0;J3QMX2	Q8BFY9;Q3TKD0	29;24;11	29;24;11	20;16;8	Transportin-1	Tnpo1	sp|Q8BFY9|TNPO1_MOUSE Transportin-1 OS=Mus musculus OX=10090 GN=Tnpo1 PE=1 SV=2;tr|Q3TKD0|Q3TKD0_MOUSE Transportin-1 (Fragment) OS=Mus musculus OX=10090 GN=Tnpo1 PE=1 SV=1	3	29	29	20	22	26	26	27	24	25	22	26	26	27	24	25	16	18	18	18	18	18	45.1	45.1	35.1	102.36	898	898;807;178	3.51	139	16	78	95	71	0	323.31	By MS/MS	By MS/MS	By MS/MS	By MS/MS	By MS/MS	By MS/MS
Q640M1	Q640M1	29	29	27	U3 small nucleolar RNA-associated protein 14 homolog A	Utp14a	sp|Q640M1|UT14A_MOUSE U3 small nucleolar RNA-associated protein 14 homolog A OS=Mus musculus OX=10090 GN=Utp14a PE=1 SV=1	1	29	29	27	25	19	23	21	24	24	25	19	23	21	24	24	23	17	21	19	22	22	44.2	44.2	41.7	87.264	767	767	3.53	88	41	35	63	55	0	170.29	By MS/MS	By MS/MS	By MS/MS	By MS/MS	By MS/MS	By MS/MS
P17426;A0A140LIG7	P17426	28;9	28;9	22;9	AP-2 complex subunit alpha-1	Ap2a1	sp|P17426|AP2A1_MOUSE AP-2 complex subunit alpha-1 OS=Mus musculus OX=10090 GN=Ap2a1 PE=1 SV=1	2	28	28	22	17	18	24	20	22	20	17	18	24	20	22	20	13	14	18	14	18	17	38.4	38.4	31.2	107.66	977	977;317	4.08	55	8	14	14	87	0	178.1	By MS/MS	By MS/MS	By MS/MS	By MS/MS	By MS/MS	By MS/MS
Q61024;D3Z0C2;D3YYR0;D3Z028	Q61024	28;8;4;3	28;8;4;3	28;8;4;3	Asparagine synthetase [glutamine-hydrolyzing]	Asns	sp|Q61024|ASNS_MOUSE Asparagine synthetase [glutamine-hydrolyzing] OS=Mus musculus OX=10090 GN=Asns PE=1 SV=3	4	28	28	28	22	24	25	22	21	22	22	24	25	22	21	22	22	24	25	22	21	22	47.8	47.8	47.8	64.282	561	561;223;158;127	3.58	131	44	53	73	98	0	173.52	By MS/MS	By MS/MS	By MS/MS	By MS/MS	By MS/MS	By MS/MS
Q6PIC6;A0A0G2JGX4;Q8VCE0;Q6PIE5;D3YYN7;Q9Z1W8;Q64436;Q91WH7;E9QNX7	Q6PIC6;A0A0G2JGX4;Q8VCE0;Q6PIE5;D3YYN7	28;28;28;14;14;4;3;3;3	18;18;18;4;4;1;0;0;0	17;17;17;3;3;0;0;0;0	Sodium/potassium-transporting ATPase subunit alpha-3;Sodium/potassium-transporting ATPase subunit alpha-2	Atp1a3;Atp1a2	sp|Q6PIC6|AT1A3_MOUSE Sodium/potassium-transporting ATPase subunit alpha-3 OS=Mus musculus OX=10090 GN=Atp1a3 PE=1 SV=1;tr|A0A0G2JGX4|A0A0G2JGX4_MOUSE Sodium/potassium-transporting ATPase subunit alpha OS=Mus musculus OX=10090 GN=Atp1a3 PE=1 SV=1;tr|Q8VCE0	9	28	18	17	23	23	22	14	14	14	14	14	14	6	6	6	13	14	13	6	6	6	32.4	24	22.9	111.69	1013	1013;1026;1053;1020;947;1035;1033;1025;1034	3.81	22	10	19	37	10	0	72.807	By MS/MS	By MS/MS	By MS/MS	By MS/MS	By MS/MS	By MS/MS
E9Q6J5	E9Q6J5	28	28	26		Bod1l	sp|E9Q6J5|BD1L1_MOUSE Biorientation of chromosomes in cell division protein 1-like 1 OS=Mus musculus OX=10090 GN=Bod1l PE=1 SV=1	1	28	28	26	20	17	23	18	23	23	20	17	23	18	23	23	19	16	21	17	21	21	13.5	13.5	12.7	327.45	3032	3032	3.72	14	52	49	23	14	0	126.13	By MS/MS	By MS/MS	By MS/MS	By MS/MS	By MS/MS	By MS/MS
Q9ER72;A0A140LIB6	Q9ER72	28;1	28;1	28;1	Cysteine--tRNA ligase, cytoplasmic	Cars	sp|Q9ER72|SYCC_MOUSE Cysteine--tRNA ligase, cytoplasmic OS=Mus musculus OX=10090 GN=Cars1 PE=1 SV=2	2	28	28	28	20	19	18	24	25	25	20	19	18	24	25	25	20	19	18	24	25	25	40.2	40.2	40.2	94.859	831	831;53	3.59	61	48	64	61	31	0	170.16	By MS/MS	By MS/MS	By MS/MS	By MS/MS	By MS/MS	By MS/MS
Q922B2;Q8BJY7	Q922B2	28;3	28;3	28;3	Aspartate--tRNA ligase, cytoplasmic	Dars	sp|Q922B2|SYDC_MOUSE Aspartate--tRNA ligase, cytoplasmic OS=Mus musculus OX=10090 GN=Dars1 PE=1 SV=2	2	28	28	28	23	27	26	25	26	22	23	27	26	25	26	22	23	27	26	25	26	22	63.5	63.5	63.5	57.147	501	501;87	3.28	147	33	72	60	70	0	261.96	By MS/MS	By MS/MS	By MS/MS	By MS/MS	By MS/MS	By MS/MS
O35286;Q497W9;A0A0G2JG10;A0A0G2JGQ5	O35286;Q497W9;A0A0G2JG10	28;25;22;7	28;25;22;7	27;24;21;7	Pre-mRNA-splicing factor ATP-dependent RNA helicase DHX15	Dhx15	sp|O35286|DHX15_MOUSE Pre-mRNA-splicing factor ATP-dependent RNA helicase DHX15 OS=Mus musculus OX=10090 GN=Dhx15 PE=1 SV=2;tr|Q497W9|Q497W9_MOUSE RNA helicase OS=Mus musculus OX=10090 GN=Dhx15 PE=1 SV=1;tr|A0A0G2JG10|A0A0G2JG10_MOUSE RNA helicase OS=Mus m	4	28	28	27	17	28	24	24	19	16	17	28	24	24	19	16	17	27	23	23	18	16	38.9	38.9	37.7	91.006	795	795;703;608;186	3.42	135	42	69	66	77	0	177.85	By MS/MS	By MS/MS	By MS/MS	By MS/MS	By MS/MS	By MS/MS
O88509	O88509	28	28	0	DNA (cytosine-5)-methyltransferase 3B	Dnmt3b	sp|O88509|DNM3B_MOUSE DNA (cytosine-5)-methyltransferase 3B OS=Mus musculus OX=10090 GN=Dnmt3b PE=1 SV=2	1	28	28	0	23	23	24	22	25	24	23	23	24	22	25	24	0	0	0	0	0	0	50.9	50.9	0	97.227	859	859	3.48	120	44	37	42	94	0	256.78	By MS/MS	By MS/MS	By MS/MS	By MS/MS	By MS/MS	By MS/MS
Q3KR45	Q3KR45	28	1	1		Dnmt3b	tr|Q3KR45|Q3KR45_MOUSE DNA (cytosine-5-)-methyltransferase OS=Mus musculus OX=10090 GN=Dnmt3b PE=1 SV=1	1	28	1	1	23	23	24	22	25	24	1	1	1	1	1	1	1	1	1	1	1	1	50.9	2.2	2.2	97.355	860	860	2.81	5	10	6			0	10.881	By MS/MS	By MS/MS	By MS/MS	By MS/MS	By MS/MS	By MS/MS
Q8BJW6;D3YZZ6;D6RFN2;D6RGA6	Q8BJW6	28;11;2;2	28;11;2;2	28;11;2;2	Eukaryotic translation initiation factor 2A;Eukaryotic translation initiation factor 2A, N-terminally processed	Eif2a	sp|Q8BJW6|EIF2A_MOUSE Eukaryotic translation initiation factor 2A OS=Mus musculus OX=10090 GN=Eif2a PE=1 SV=2	4	28	28	28	23	23	22	25	27	27	23	23	22	25	27	27	23	23	22	25	27	27	59.2	59.2	59.2	64.403	581	581;251;59;60	3.47	115	58	42	42	89	0	236.26	By MS/MS	By MS/MS	By MS/MS	By MS/MS	By MS/MS	By MS/MS
P26040	P26040	28	18	17	Ezrin	Ezr	sp|P26040|EZRI_MOUSE Ezrin OS=Mus musculus OX=10090 GN=Ezr PE=1 SV=3	1	28	18	17	23	23	26	25	24	23	16	13	16	15	14	14	15	12	15	14	13	13	46.1	32.1	30.5	69.406	586	586	3.07	102	32	65	27	34	0	224.92	By MS/MS	By MS/MS	By MS/MS	By MS/MS	By MS/MS	By MS/MS
Q9DBE9	Q9DBE9	28	28	28	pre-rRNA processing protein FTSJ3	Ftsj3	sp|Q9DBE9|SPB1_MOUSE pre-rRNA 2-O-ribose RNA methyltransferase FTSJ3 OS=Mus musculus OX=10090 GN=Ftsj3 PE=1 SV=1	1	28	28	28	22	22	25	23	23	23	22	22	25	23	23	23	22	22	25	23	23	23	40.1	40.1	40.1	95.531	838	838	3.14	101	40	45	60	25	0	188.85	By MS/MS	By MS/MS	By MS/MS	By MS/MS	By MS/MS	By MS/MS
Q61584;A0A0G2JEP0;A0A0H2UH27;A0A0G2JGL6;A0A0G2JGH0	Q61584;A0A0G2JEP0;A0A0H2UH27	28;25;19;4;1	28;25;19;4;1	26;23;17;4;1	Fragile X mental retardation syndrome-related protein 1	Fxr1	sp|Q61584|FXR1_MOUSE Fragile X mental retardation syndrome-related protein 1 OS=Mus musculus OX=10090 GN=Fxr1 PE=1 SV=2;tr|A0A0G2JEP0|A0A0G2JEP0_MOUSE Fragile X mental retardation syndrome-related protein 1 OS=Mus musculus OX=10090 GN=Fxr1 PE=1 SV=1;tr|A0A	5	28	28	26	21	21	24	25	25	23	21	21	24	25	25	23	19	19	22	23	23	21	48.7	48.7	46.4	76.221	677	677;568;454;133;54	3.12	96	46	52	43	29	0	160.29	By MS/MS	By MS/MS	By MS/MS	By MS/MS	By MS/MS	By MS/MS
P16858;A0A0A0MQF6;A0A1D5RLD8;S4R257;S4R1N5;V9GXA7	P16858;A0A0A0MQF6;A0A1D5RLD8;S4R257	28;28;23;20;4;1	28;28;23;20;4;1	3;3;1;3;0;1	Glyceraldehyde-3-phosphate dehydrogenase	Gapdh	sp|P16858|G3P_MOUSE Glyceraldehyde-3-phosphate dehydrogenase OS=Mus musculus OX=10090 GN=Gapdh PE=1 SV=2;tr|A0A0A0MQF6|A0A0A0MQF6_MOUSE Glyceraldehyde-3-phosphate dehydrogenase OS=Mus musculus OX=10090 GN=Gapdh PE=1 SV=1;tr|A0A1D5RLD8|A0A1D5RLD8_MOUSE Glyc	6	28	28	3	24	27	26	25	26	27	24	27	26	25	26	27	3	3	3	3	3	3	82.6	82.6	12.3	35.81	333	333;359;333;280;57;121	3.52	715	740	505	460	506	0	323.31	By MS/MS	By MS/MS	By MS/MS	By MS/MS	By MS/MS	By MS/MS
A2AFQ9;Q8BX17;E9PUU4;F7CKD6	A2AFQ9;Q8BX17;E9PUU4	28;27;27;6	28;27;27;6	28;27;27;6	Gem-associated protein 5	Gemin5	tr|A2AFQ9|A2AFQ9_MOUSE Gem-associated protein 5 OS=Mus musculus OX=10090 GN=Gemin5 PE=1 SV=1;sp|Q8BX17|GEMI5_MOUSE Gem-associated protein 5 OS=Mus musculus OX=10090 GN=Gemin5 PE=1 SV=2;tr|E9PUU4|E9PUU4_MOUSE Gem-associated protein 5 OS=Mus musculus OX=1009	4	28	28	28	15	17	19	22	17	18	15	17	19	22	17	18	15	17	19	22	17	18	23.3	23.3	23.3	166.52	1501	1501;1502;1503;177	4.07	46	15	26	25	70	0	95.186	By MS/MS	By MS/MS	By MS/MS	By MS/MS	By MS/MS	By MS/MS
P05201;F7ALS6	P05201	28;8	28;8	28;8	Aspartate aminotransferase, cytoplasmic	Got1	sp|P05201|AATC_MOUSE Aspartate aminotransferase, cytoplasmic OS=Mus musculus OX=10090 GN=Got1 PE=1 SV=3	2	28	28	28	24	21	24	22	23	23	24	21	24	22	23	23	24	21	24	22	23	23	70.9	70.9	70.9	46.247	413	413;182	3.69	127	7	30	81	100	0	262.36	By MS/MS	By MS/MS	By MS/MS	By MS/MS	By MS/MS	By MS/MS
B2M1R6;H3BKD0;H3BKI8;Q8BT23;H3BJS9;H3BLP7	B2M1R6;H3BKD0;H3BKI8	28;18;14;8;7;7	28;18;14;8;7;7	3;2;2;0;2;0		Hnrnpk	tr|B2M1R6|B2M1R6_MOUSE Heterogeneous nuclear ribonucleoprotein K OS=Mus musculus OX=10090 GN=Hnrnpk PE=1 SV=1;tr|H3BKD0|H3BKD0_MOUSE Heterogeneous nuclear ribonucleoprotein K (Fragment) OS=Mus musculus OX=10090 GN=Hnrnpk PE=1 SV=1;tr|H3BKI8|H3BKI8_MOUSE He	6	28	28	3	26	27	26	26	26	26	26	27	26	26	26	26	3	3	3	2	2	2	55.7	55.7	4.8	48.562	440	440;299;178;97;87;210	3.57	196	134	135	140	132	0	323.31	By MS/MS	By MS/MS	By MS/MS	By MS/MS	By MS/MS	By MS/MS
P24547;A0A0A6YY72;A0A0A6YXS4	P24547;A0A0A6YY72	28;15;12	28;15;12	27;15;11	Inosine-5-monophosphate dehydrogenase 2	Impdh2	sp|P24547|IMDH2_MOUSE Inosine-5-monophosphate dehydrogenase 2 OS=Mus musculus OX=10090 GN=Impdh2 PE=1 SV=2;tr|A0A0A6YY72|A0A0A6YY72_MOUSE Inosine-5-monophosphate dehydrogenase 2 (Fragment) OS=Mus musculus OX=10090 GN=Impdh2 PE=1 SV=1	3	28	28	27	23	23	26	23	27	26	23	23	26	23	27	26	22	23	25	23	26	25	54.5	54.5	52.9	55.814	514	514;320;248	3.47	183	18	47	87	119	0	323.31	By MS/MS	By MS/MS	By MS/MS	By MS/MS	By MS/MS	By MS/MS
Q8BKS9;A0A0N4SUH4;A0A494BBI7;A0A494BB98	Q8BKS9;A0A0N4SUH4;A0A494BBI7	28;28;17;9	28;28;17;9	28;28;17;9	Pumilio domain-containing protein KIAA0020	Kiaa0020	sp|Q8BKS9|PUM3_MOUSE Pumilio homolog 3 OS=Mus musculus OX=10090 GN=Pum3 PE=1 SV=2;tr|A0A0N4SUH4|A0A0N4SUH4_MOUSE Pumilio homolog 3 OS=Mus musculus OX=10090 GN=Pum3 PE=1 SV=1;tr|A0A494BBI7|A0A494BBI7_MOUSE Pumilio homolog 3 (Fragment) OS=Mus musculus OX=100	4	28	28	28	24	22	24	21	21	21	24	22	24	21	21	21	24	22	24	21	21	21	46.5	46.5	46.5	72.799	647	647;648;404;300	4.09	80		32	40	112	0	235.84	By MS/MS	By MS/MS	By MS/MS	By MS/MS	By MS/MS	By MS/MS
P27546;A0A0G2JFH2;A0A0G2JDN7;E9PZ43;A0A140T8T5;A0A0G2JFT4;A0A0G2JG35;Q78TF3;A0A0G2JFK3;A0A0G2JDY5;A0A0G2JE57;A0A0G2JDU1	P27546	28;10;9;9;7;6;6;2;2;2;1;1	28;10;9;9;7;6;6;2;2;2;1;1	28;10;9;9;7;6;6;2;2;2;1;1	Microtubule-associated protein 4	Map4	sp|P27546|MAP4_MOUSE Microtubule-associated protein 4 OS=Mus musculus OX=10090 GN=Map4 PE=1 SV=3	12	28	28	28	27	24	26	23	25	28	27	24	26	23	25	28	27	24	26	23	25	28	42	42	42	117.43	1125	1125;1441;902;933;414;276;290;99;207;220;81;116	2.96	112	142	45	45	25	0	229.9	By MS/MS	By MS/MS	By MS/MS	By MS/MS	By MS/MS	By MS/MS
Q99K48;B1AXT0	Q99K48	28;3	26;3	25;3	Non-POU domain-containing octamer-binding protein	Nono	sp|Q99K48|NONO_MOUSE Non-POU domain-containing octamer-binding protein OS=Mus musculus OX=10090 GN=Nono PE=1 SV=3	2	28	26	25	25	23	24	21	21	23	23	21	22	20	20	21	22	20	22	19	19	20	58.8	58.8	57.3	54.54	473	473;98	3.66	166	15	58	150	98	0	252.14	By MS/MS	By MS/MS	By MS/MS	By MS/MS	By MS/MS	By MS/MS
Q99P88;A0A2R8VHH1	Q99P88;A0A2R8VHH1	28;28	28;28	28;28	Nuclear pore complex protein Nup155	Nup155	sp|Q99P88|NU155_MOUSE Nuclear pore complex protein Nup155 OS=Mus musculus OX=10090 GN=Nup155 PE=1 SV=1;tr|A0A2R8VHH1|A0A2R8VHH1_MOUSE Nuclear pore complex protein Nup155 OS=Mus musculus OX=10090 GN=Nup155 PE=1 SV=1	2	28	28	28	16	23	23	18	10	15	16	23	23	18	10	15	16	23	23	18	10	15	27.3	27.3	27.3	155.12	1391	1391;1346	4.22	37	7	28	38	59	0	163.33	By MS/MS	By MS/MS	By MS/MS	By MS/MS	By MS/MS	By MS/MS
Q9DCL9;D3Z6P1;D6RCU8	Q9DCL9	28;5;4	28;5;4	28;5;4	Multifunctional protein ADE2;Phosphoribosylaminoimidazole-succinocarboxamide synthase;Phosphoribosylaminoimidazole carboxylase	Paics	sp|Q9DCL9|PUR6_MOUSE Multifunctional protein ADE2 OS=Mus musculus OX=10090 GN=Paics PE=1 SV=4	3	28	28	28	25	27	28	27	25	27	25	27	28	27	25	27	25	27	28	27	25	27	60.5	60.5	60.5	47.006	425	425;83;103	3.25	209	45	113	105	77	0	323.31	By MS/MS	By MS/MS	By MS/MS	By MS/MS	By MS/MS	By MS/MS
Q9QUR6	Q9QUR6	28	28	28	Prolyl endopeptidase	Prep	sp|Q9QUR6|PPCE_MOUSE Prolyl endopeptidase OS=Mus musculus OX=10090 GN=Prep PE=1 SV=1	1	28	28	28	19	21	24	26	22	24	19	21	24	26	22	24	19	21	24	26	22	24	46.5	46.5	46.5	80.751	710	710	4.1	77	16	60	89	96	0	291.77	By MS/MS	By MS/MS	By MS/MS	By MS/MS	By MS/MS	By MS/MS
B2RY56;S4R2B0;S4R2A4;S4R2J1;S4R1X9;S4R2F7	B2RY56;S4R2B0	28;20;6;5;1;1	28;20;6;5;1;1	28;20;6;5;1;1	RNA-binding protein 25	Rbm25	sp|B2RY56|RBM25_MOUSE RNA-binding protein 25 OS=Mus musculus OX=10090 GN=Rbm25 PE=1 SV=2;tr|S4R2B0|S4R2B0_MOUSE RNA-binding protein 25 (Fragment) OS=Mus musculus OX=10090 GN=Rbm25 PE=1 SV=1	6	28	28	28	23	23	25	22	22	24	23	23	25	22	22	24	23	23	25	22	22	24	30.7	30.7	30.7	99.551	838	838;585;194;174;163;194	3.32	97	54	53	28	59	0	274.28	By MS/MS	By MS/MS	By MS/MS	By MS/MS	By MS/MS	By MS/MS
P26043;A0A5F8MPB9;Q7TSG6	P26043;A0A5F8MPB9;Q7TSG6	28;27;18	14;14;6	14;14;6	Radixin	Rdx	sp|P26043|RADI_MOUSE Radixin OS=Mus musculus OX=10090 GN=Rdx PE=1 SV=3;tr|A0A5F8MPB9|A0A5F8MPB9_MOUSE Radixin OS=Mus musculus OX=10090 GN=Rdx PE=1 SV=1;tr|Q7TSG6|Q7TSG6_MOUSE Radixin OS=Mus musculus OX=10090 GN=Rdx PE=1 SV=1	3	28	14	14	21	26	24	23	23	25	13	13	11	11	11	13	13	13	11	11	11	13	46.7	25.2	25.2	68.542	583	583;604;389	3.96	31	6	36	35	29	0	75.439	By MS/MS	By MS/MS	By MS/MS	By MS/MS	By MS/MS	By MS/MS
E9PWW9;A0A0U1RPA7;A0A0U1RP31	E9PWW9	28;2;1	28;2;1	28;2;1		Rsf1	tr|E9PWW9|E9PWW9_MOUSE Remodeling and spacing factor 1 OS=Mus musculus OX=10090 GN=Rsf1 PE=1 SV=2	3	28	28	28	24	19	25	18	23	20	24	19	25	18	23	20	24	19	25	18	23	20	24.6	24.6	24.6	161.75	1441	1441;109;121	3.26	31	91	26	30	8	0	134.29	By MS/MS	By MS/MS	By MS/MS	By MS/MS	By MS/MS	By MS/MS
Q9Z315;A0A494B9E9	Q9Z315	28;5	28;5	28;5	U4/U6.U5 tri-snRNP-associated protein 1	Sart1	sp|Q9Z315|SNUT1_MOUSE U4/U6.U5 tri-snRNP-associated protein 1 OS=Mus musculus OX=10090 GN=Sart1 PE=1 SV=1	2	28	28	28	20	18	21	21	21	23	20	18	21	21	21	23	20	18	21	21	21	23	35.7	35.7	35.7	90.884	806	806;113	3.36	71	22	72	32	29	0	169.8	By MS/MS	By MS/MS	By MS/MS	By MS/MS	By MS/MS	By MS/MS
Q3UMC0;A0A0A0MQ80;A0A0G2JFY0;Q9D3R6;D3Z0U5;D6RGM7;D3Z4J2	Q3UMC0;A0A0A0MQ80;A0A0G2JFY0	28;28;27;1;1;1;1	28;28;27;1;1;1;1	28;28;27;1;1;1;1	Spermatogenesis-associated protein 5	Spata5	sp|Q3UMC0|AFG2H_MOUSE ATPase family protein 2 homolog OS=Mus musculus OX=10090 GN=Spata5 PE=1 SV=2;tr|A0A0A0MQ80|A0A0A0MQ80_MOUSE Vesicle-fusing ATPase OS=Mus musculus OX=10090 GN=Spata5 PE=1 SV=1;tr|A0A0G2JFY0|A0A0G2JFY0_MOUSE ATPase family protein 2 homo	7	28	28	28	18	17	23	19	25	21	18	17	23	19	25	21	18	17	23	19	25	21	40.2	40.2	40.2	97.255	893	893;892;842;539;277;372;495	3.88	56	8	50	65	42	0	107.24	By MS/MS	By MS/MS	By MS/MS	By MS/MS	By MS/MS	By MS/MS
O08784;H3BL37;H3BIX0;F6R3V4;H3BK88	O08784;H3BL37;H3BIX0;F6R3V4	28;28;19;16;3	28;28;19;16;3	28;28;19;16;3	Treacle protein	Tcof1	sp|O08784|TCOF_MOUSE Treacle protein OS=Mus musculus OX=10090 GN=Tcof1 PE=1 SV=1;tr|H3BL37|H3BL37_MOUSE Treacle protein OS=Mus musculus OX=10090 GN=Tcof1 PE=1 SV=1;tr|H3BIX0|H3BIX0_MOUSE Treacle protein (Fragment) OS=Mus musculus OX=10090 GN=Tcof1 PE=1 SV=	5	28	28	28	27	27	23	23	24	26	27	27	23	23	24	26	27	27	23	23	24	26	27.1	27.1	27.1	135	1320	1320;1356;1056;1013;167	3.08	158	76	68	74	44	0	192.13	By MS/MS	By MS/MS	By MS/MS	By MS/MS	By MS/MS	By MS/MS
Q6P5E4;G3UYG7;G3UY73;G3UY35;G3UZU8	Q6P5E4	28;7;2;2;1	28;7;2;2;1	28;7;2;2;1	UDP-glucose:glycoprotein glucosyltransferase 1	Uggt1	sp|Q6P5E4|UGGG1_MOUSE UDP-glucose:glycoprotein glucosyltransferase 1 OS=Mus musculus OX=10090 GN=Uggt1 PE=1 SV=4	5	28	28	28	19	22	25	20	20	17	19	22	25	20	20	17	19	22	25	20	20	17	25.4	25.4	25.4	176.43	1551	1551;262;47;82;265	3.75	58	16	52	52	42	0	142.67	By MS/MS	By MS/MS	By MS/MS	By MS/MS	By MS/MS	By MS/MS
Q8BHB4;H3BJD8;H3BLC1	Q8BHB4	28;1;1	28;1;1	28;1;1	WD repeat-containing protein 3	Wdr3	sp|Q8BHB4|WDR3_MOUSE WD repeat-containing protein 3 OS=Mus musculus OX=10090 GN=Wdr3 PE=1 SV=1	3	28	28	28	18	23	25	24	21	23	18	23	25	24	21	23	18	23	25	24	21	23	39.7	39.7	39.7	105.77	942	942;61;76	4.02	74	19	12	43	101	0	148.72	By MS/MS	By MS/MS	By MS/MS	By MS/MS	By MS/MS	By MS/MS
Q9Z103	Q9Z103	27	27	27	Activity-dependent neuroprotector homeobox protein	Adnp	sp|Q9Z103|ADNP_MOUSE Activity-dependent neuroprotector homeobox protein OS=Mus musculus OX=10090 GN=Adnp PE=1 SV=2	1	27	27	27	26	20	25	16	23	24	26	20	25	16	23	24	26	20	25	16	23	24	33.6	33.6	33.6	124.31	1108	1108	3.65	60	29	54	35	48	0	114.3	By MS/MS	By MS/MS	By MS/MS	By MS/MS	By MS/MS	By MS/MS
P17427;A0A140LHG0;A0A140LHA6	P17427	27;1;1	21;0;0	21;0;0	AP-2 complex subunit alpha-2	Ap2a2	sp|P17427|AP2A2_MOUSE AP-2 complex subunit alpha-2 OS=Mus musculus OX=10090 GN=Ap2a2 PE=1 SV=2	3	27	21	21	20	19	22	25	21	22	16	15	16	19	17	19	16	15	16	19	17	19	33.7	26.2	26.2	104.02	938	938;38;57	3.86	54	15	23	29	61	0	147.76	By MS/MS	By MS/MS	By MS/MS	By MS/MS	By MS/MS	By MS/MS
A0A0U1RPL0;Q7TQH0;E9Q5Q0;J3QP59	A0A0U1RPL0;Q7TQH0;E9Q5Q0	27;26;24;9	27;26;24;9	2;1;0;0	Ataxin-2-like protein	Atxn2l	tr|A0A0U1RPL0|A0A0U1RPL0_MOUSE Ataxin-2-like protein OS=Mus musculus OX=10090 GN=Atxn2l PE=1 SV=1;sp|Q7TQH0|ATX2L_MOUSE Ataxin-2-like protein OS=Mus musculus OX=10090 GN=Atxn2l PE=1 SV=1;tr|E9Q5Q0|E9Q5Q0_MOUSE Ataxin-2-like protein (Fragment) OS=Mus muscul	4	27	27	2	22	24	26	25	25	25	22	24	26	25	25	25	2	2	2	2	2	2	32.8	32.8	4.4	115.26	1096	1096;1049;863;218	3.19	105	65	68	42	40	0	255.79	By MS/MS	By MS/MS	By MS/MS	By MS/MS	By MS/MS	By MS/MS
E9QAE3	E9QAE3	27	27	27		Btaf1	tr|E9QAE3|E9QAE3_MOUSE B-TFIID TATA-box-binding protein-associated factor 1 OS=Mus musculus OX=10090 GN=Btaf1 PE=1 SV=1	1	27	27	27	21	19	20	17	17	16	21	19	20	17	17	16	21	19	20	17	17	16	20	20	20	207.05	1848	1848	4.14	35	13	23	15	62	0	119.72	By MS/MS	By MS/MS	By MS/MS	By MS/MS	By MS/MS	By MS/MS
P49025;F6SBR5;E9QL53	P49025;F6SBR5;E9QL53	27;27;27	27;27;27	1;1;1	Citron Rho-interacting kinase	Cit	sp|P49025|CTRO_MOUSE Citron Rho-interacting kinase OS=Mus musculus OX=10090 GN=Cit PE=1 SV=3;tr|F6SBR5|F6SBR5_MOUSE Citron Rho-interacting kinase OS=Mus musculus OX=10090 GN=Cit PE=1 SV=2;tr|E9QL53|E9QL53_MOUSE Citron Rho-interacting kinase OS=Mus musculus	3	27	27	1	21	19	20	14	15	16	21	19	20	14	15	16	0	1	1	1	1	0	15.8	15.8	0.5	235.39	2055	2055;2013;2055	4.47	14	15	24	45	38	0	65.979	By MS/MS	By MS/MS	By MS/MS	By MS/MS	By MS/MS	By MS/MS
Q9JJY4;A0A0G2JE88	Q9JJY4	27;6	27;6	27;6	Probable ATP-dependent RNA helicase DDX20	Ddx20	sp|Q9JJY4|DDX20_MOUSE Probable ATP-dependent RNA helicase DDX20 OS=Mus musculus OX=10090 GN=Ddx20 PE=1 SV=2	2	27	27	27	19	19	23	21	23	23	19	19	23	21	23	23	19	19	23	21	23	23	47.8	47.8	47.8	91.709	825	825;139	3.59	67	43	27	33	59	0	150.72	By MS/MS	By MS/MS	By MS/MS	By MS/MS	By MS/MS	By MS/MS
D3Z0M9	D3Z0M9	27	27	27		Ddx23	tr|D3Z0M9|D3Z0M9_MOUSE RNA helicase OS=Mus musculus OX=10090 GN=Ddx23 PE=1 SV=1	1	27	27	27	22	22	20	20	17	15	22	22	20	20	17	15	22	22	20	20	17	15	37.9	37.9	37.9	95.493	819	819	3.64	71	30	33	70	42	0	131.36	By MS/MS	By MS/MS	By MS/MS	By MS/MS	By MS/MS	By MS/MS
Q9ESV0;F8WJA0;A0A1Y7VKX7;A0A1Y7VLU4;A0A1Y7VK75;A0A1Y7VMS6	Q9ESV0;F8WJA0;A0A1Y7VKX7	27;27;24;4;4;2	27;27;24;4;4;2	27;27;24;4;4;2	ATP-dependent RNA helicase DDX24	Ddx24	sp|Q9ESV0|DDX24_MOUSE ATP-dependent RNA helicase DDX24 OS=Mus musculus OX=10090 GN=Ddx24 PE=1 SV=2;tr|F8WJA0|F8WJA0_MOUSE RNA helicase OS=Mus musculus OX=10090 GN=Ddx24 PE=1 SV=1;tr|A0A1Y7VKX7|A0A1Y7VKX7_MOUSE RNA helicase OS=Mus musculus OX=10090 GN=Ddx24	6	27	27	27	20	22	21	21	24	23	20	22	21	21	24	23	20	22	21	21	24	23	41.8	41.8	41.8	96.428	857	857;903;791;119;176;119	3.71	81	32	23	51	74	0	139.47	By MS/MS	By MS/MS	By MS/MS	By MS/MS	By MS/MS	By MS/MS
E9PV41;O08808;E9PXV7;F6XC54;D3Z074	E9PV41;O08808;E9PXV7;F6XC54;D3Z074	27;26;26;24;24	27;26;26;24;24	27;26;26;24;24	Protein diaphanous homolog 1	Diap1;Diaph1	tr|E9PV41|E9PV41_MOUSE Protein diaphanous homolog 1 OS=Mus musculus OX=10090 GN=Diaph1 PE=1 SV=1;sp|O08808|DIAP1_MOUSE Protein diaphanous homolog 1 OS=Mus musculus OX=10090 GN=Diaph1 PE=1 SV=1;tr|E9PXV7|E9PXV7_MOUSE Protein diaphanous homolog 1 OS=Mus musc	5	27	27	27	17	15	19	19	21	18	17	15	19	19	21	18	17	15	19	19	21	18	24.4	24.4	24.4	140.4	1264	1264;1255;1255;1220;1220	3.78	51	18	27	64	32	0	80.982	By MS/MS	By MS/MS	By MS/MS	By MS/MS	By MS/MS	By MS/MS
Q3TCR7;G3X9G4;P39054;Q3T9X3;F8WIV5;G3UZZ3;G3UXX2;P39053;A0A0J9YUE9;A0A0J9YUN4;G3UY64;F6W8Z8	Q3TCR7;G3X9G4;P39054;Q3T9X3;F8WIV5;G3UZZ3	27;27;24;24;24;21;8;7;7;7;2;1	27;27;24;24;24;21;8;7;7;7;2;1	18;18;17;17;17;15;3;4;4;4;2;1	Dynamin-2	Dnm2	tr|Q3TCR7|Q3TCR7_MOUSE Dynamin GTPase OS=Mus musculus OX=10090 GN=Dnm2 PE=1 SV=1;tr|G3X9G4|G3X9G4_MOUSE Dynamin GTPase OS=Mus musculus OX=10090 GN=Dnm2 PE=1 SV=1;sp|P39054|DYN2_MOUSE Dynamin-2 OS=Mus musculus OX=10090 GN=Dnm2 PE=1 SV=2;tr|Q3T9X3|Q3T9X3_MOU	12	27	27	18	21	16	22	11	17	13	21	16	22	11	17	13	15	10	15	8	10	9	38.1	38.1	26.7	97.986	869	869;870;870;860;870;807;248;867;835;864;69;283	4.07	42	6	34	47	49	0	133.21	By MS/MS	By MS/MS	By MS/MS	By MS/MS	By MS/MS	By MS/MS
Q8BWY3	Q8BWY3	27	27	27	Eukaryotic peptide chain release factor subunit 1	Etf1	sp|Q8BWY3|ERF1_MOUSE Eukaryotic peptide chain release factor subunit 1 OS=Mus musculus OX=10090 GN=Etf1 PE=1 SV=4	1	27	27	27	23	25	26	26	24	26	23	25	26	26	24	26	23	25	26	26	24	26	65.7	65.7	65.7	49.03	437	437	3.4	149	42	89	86	70	0	323.31	By MS/MS	By MS/MS	By MS/MS	By MS/MS	By MS/MS	By MS/MS
Q8CHG3;E9PWI6;B2RSU7;E0CYI9;F6UT01;E0CY89	Q8CHG3;E9PWI6;B2RSU7;E0CYI9	27;27;27;25;3;1	27;27;27;25;3;1	27;27;27;25;3;1	GRIP and coiled-coil domain-containing protein 2	Gcc2	sp|Q8CHG3|GCC2_MOUSE GRIP and coiled-coil domain-containing protein 2 OS=Mus musculus OX=10090 GN=Gcc2 PE=1 SV=2;tr|E9PWI6|E9PWI6_MOUSE GRIP and coiled-coil domain-containing protein 2 OS=Mus musculus OX=10090 GN=Gcc2 PE=1 SV=1;tr|B2RSU7|B2RSU7_MOUSE GRIP	6	27	27	27	19	6	13	12	18	19	19	6	13	12	18	19	19	6	13	12	18	19	19.5	19.5	19.5	194.44	1679	1679;1644;1680;1576;181;94	4.15	6	19	30	25	13	0	71.09	By MS/MS	By MS/MS	By MS/MS	By MS/MS	By MS/MS	By MS/MS
Q61543;F8WHM5;F6RSH1;E9PWD8	Q61543;F8WHM5	27;27;9;6	27;27;9;6	27;27;9;6	Golgi apparatus protein 1	Glg1	sp|Q61543|GSLG1_MOUSE Golgi apparatus protein 1 OS=Mus musculus OX=10090 GN=Glg1 PE=1 SV=1;tr|F8WHM5|F8WHM5_MOUSE Golgi apparatus protein 1 (Fragment) OS=Mus musculus OX=10090 GN=Glg1 PE=1 SV=1	4	27	27	27	15	17	26	17	12	13	15	17	26	17	12	13	15	17	26	17	12	13	28.3	28.3	28.3	133.73	1175	1175;1163;591;302	4	26	12	40	36	27	0	80.672	By MS/MS	By MS/MS	By MS/MS	By MS/MS	By MS/MS	By MS/MS
Q99ME9;A0A217FL53	Q99ME9	27;8	27;8	27;8	Nucleolar GTP-binding protein 1	Gtpbp4	sp|Q99ME9|NOG1_MOUSE Nucleolar GTP-binding protein 1 OS=Mus musculus OX=10090 GN=Gtpbp4 PE=1 SV=3	2	27	27	27	18	23	20	22	22	24	18	23	20	22	22	24	18	23	20	22	22	24	46.1	46.1	46.1	74.112	634	634;164	3.82	78	23	23	63	74	0	110.98	By MS/MS	By MS/MS	By MS/MS	By MS/MS	By MS/MS	By MS/MS
Q8BMS1	Q8BMS1	27	27	27	Trifunctional enzyme subunit alpha, mitochondrial;Long-chain enoyl-CoA hydratase;Long chain 3-hydroxyacyl-CoA dehydrogenase	Hadha	sp|Q8BMS1|ECHA_MOUSE Trifunctional enzyme subunit alpha, mitochondrial OS=Mus musculus OX=10090 GN=Hadha PE=1 SV=1	1	27	27	27	26	24	25	23	23	25	26	24	25	23	23	25	26	24	25	23	23	25	45.6	45.6	45.6	82.669	763	763	4	128	23	51	120	144	0	229.42	By MS/MS	By MS/MS	By MS/MS	By MS/MS	By MS/MS	By MS/MS
P61979;H3BLL4;A0A286YDM3;H3BK96;A0A286YCM2;A0A286YEC4;A0A286YDH1;A0A286YE41;H3BJ43	P61979;H3BLL4;A0A286YDM3;H3BK96;A0A286YCM2	27;19;17;17;16;13;12;6;6	2;2;2;2;2;2;2;0;0	2;2;2;2;2;2;2;0;0	Heterogeneous nuclear ribonucleoprotein K	Hnrnpk	sp|P61979|HNRPK_MOUSE Heterogeneous nuclear ribonucleoprotein K OS=Mus musculus OX=10090 GN=Hnrnpk PE=1 SV=1;tr|H3BLL4|H3BLL4_MOUSE Heterogeneous nuclear ribonucleoprotein K OS=Mus musculus OX=10090 GN=Hnrnpk PE=1 SV=1;tr|A0A286YDM3|A0A286YDM3_MOUSE Hetero	9	27	2	2	25	26	25	26	26	26	2	2	2	2	2	2	2	2	2	2	2	2	56.4	8	8	50.976	463	463;394;230;256;192;150;143;52;77	3.79	19			9	19	0	82.951	By MS/MS	By MS/MS	By MS/MS	By MS/MS	By MS/MS	By MS/MS
F6RPJ9;Q9JHR7	F6RPJ9;Q9JHR7	27;25	27;25	27;25	Insulin-degrading enzyme	Ide	tr|F6RPJ9|F6RPJ9_MOUSE Insulin-degrading enzyme (Fragment) OS=Mus musculus OX=10090 GN=Ide PE=1 SV=1;sp|Q9JHR7|IDE_MOUSE Insulin-degrading enzyme OS=Mus musculus OX=10090 GN=Ide PE=1 SV=1	2	27	27	27	15	20	20	21	21	20	15	20	20	21	21	20	15	20	20	21	21	20	32	32	32	114.15	987	987;1019	3.99	48	27	5	44	63	0	80.015	By MS/MS	By MS/MS	By MS/MS	By MS/MS	By MS/MS	By MS/MS
P06151;A0A1B0GSX0;A0A1B0GSR9;D3YZQ9;A0A1B0GQX5;A0A1B0GT41;A0A1B0GSL7;A0A1B0GS79;A0A1B0GRC1;A0A1B0GRS2	P06151;A0A1B0GSX0;A0A1B0GSR9;D3YZQ9;A0A1B0GQX5;A0A1B0GT41	27;26;25;18;16;15;12;7;5;5	27;26;25;18;16;15;12;7;5;5	17;17;17;8;6;5;3;0;0;0	L-lactate dehydrogenase A chain;L-lactate dehydrogenase	Ldha	sp|P06151|LDHA_MOUSE L-lactate dehydrogenase A chain OS=Mus musculus OX=10090 GN=Ldha PE=1 SV=3;tr|A0A1B0GSX0|A0A1B0GSX0_MOUSE L-lactate dehydrogenase OS=Mus musculus OX=10090 GN=Ldha PE=1 SV=1;tr|A0A1B0GSR9|A0A1B0GSR9_MOUSE L-lactate dehydrogenase OS=Mus	10	27	27	17	23	21	23	27	25	25	23	21	23	27	25	25	15	13	15	17	16	16	74.7	74.7	53	36.498	332	332;361;315;236;201;176;128;205;66;68	3.58	219	67	159	89	170	0	323.31	By MS/MS	By MS/MS	By MS/MS	By MS/MS	By MS/MS	By MS/MS
Q91VD9;A0A087WQR0;A0A087WQ77;A0A087WP77;A0A087WR47	Q91VD9	27;4;2;2;1	27;4;2;2;1	27;4;2;2;1	NADH-ubiquinone oxidoreductase 75 kDa subunit, mitochondrial	Ndufs1	sp|Q91VD9|NDUS1_MOUSE NADH-ubiquinone oxidoreductase 75 kDa subunit, mitochondrial OS=Mus musculus OX=10090 GN=Ndufs1 PE=1 SV=2	5	27	27	27	19	19	24	24	24	23	19	19	24	24	24	23	19	19	24	24	24	23	50.3	50.3	50.3	79.776	727	727;118;62;135;79	3.63	89	26	49	32	79	0	130.65	By MS/MS	By MS/MS	By MS/MS	By MS/MS	By MS/MS	By MS/MS
Q8BHG1;A2A9Q2;A6PWC3;Q3V3G9	Q8BHG1;A2A9Q2;A6PWC3	27;27;25;8	27;27;25;8	27;27;25;8	Nardilysin	Nrd1	sp|Q8BHG1|NRDC_MOUSE Nardilysin OS=Mus musculus OX=10090 GN=Nrdc PE=1 SV=1;tr|A2A9Q2|A2A9Q2_MOUSE Nardilysin, N-arginine dibasic convertase, NRD convertase 1 OS=Mus musculus OX=10090 GN=Nrd1 PE=1 SV=1;tr|A6PWC3|A6PWC3_MOUSE Nardilysin, N-arginine dibasic c	4	27	27	27	15	23	21	22	20	17	15	23	21	22	20	17	15	23	21	22	20	17	26.7	26.7	26.7	132.89	1161	1161;1229;1117;395	4.18	46	7	43	24	78	0	148.36	By MS/MS	By MS/MS	By MS/MS	By MS/MS	By MS/MS	By MS/MS
Q8BZH4;D3YUW8;D3YUX1;Q0VGT3;F7D0L1	Q8BZH4;D3YUW8;D3YUX1;Q0VGT3	27;27;27;26;2	27;27;27;26;2	27;27;27;26;2	Pogo transposable element with ZNF domain	Pogz	sp|Q8BZH4|POGZ_MOUSE Pogo transposable element with ZNF domain OS=Mus musculus OX=10090 GN=Pogz PE=1 SV=2;tr|D3YUW8|D3YUW8_MOUSE Pogo transposable element with ZNF domain OS=Mus musculus OX=10090 GN=Pogz PE=1 SV=1;tr|D3YUX1|D3YUX1_MOUSE Pogo transposable e	5	27	27	27	21	19	23	16	16	17	21	19	23	16	16	17	21	19	23	16	16	17	29.8	29.8	29.8	154.91	1409	1409;1314;1356;1400;54	3.56	30	42	42	8	29	0	184.22	By MS/MS	By MS/MS	By MS/MS	By MS/MS	By MS/MS	By MS/MS
P52431;D6RFB8	P52431;D6RFB8	27;21	27;21	27;21	DNA polymerase delta catalytic subunit;DNA polymerase	Pold1	sp|P52431|DPOD1_MOUSE DNA polymerase delta catalytic subunit OS=Mus musculus OX=10090 GN=Pold1 PE=1 SV=2;tr|D6RFB8|D6RFB8_MOUSE DNA polymerase OS=Mus musculus OX=10090 GN=Pold1 PE=1 SV=1	2	27	27	27	22	22	24	19	18	17	22	22	24	19	18	17	22	22	24	19	18	17	30.6	30.6	30.6	123.79	1105	1105;981	3.47	77	18	31	10	66	0	164.96	By MS/MS	By MS/MS	By MS/MS	By MS/MS	By MS/MS	By MS/MS
Q9D4G5;Q8K205	Q9D4G5;Q8K205	27;26	27;26	27;26		Pop1	tr|Q9D4G5|Q9D4G5_MOUSE Processing of precursor 1, ribonuclease P/MRP family, (S. cerevisiae) OS=Mus musculus OX=10090 GN=Pop1 PE=1 SV=1;tr|Q8K205|Q8K205_MOUSE Processing of 1, ribonuclease P/MRP family, (S. cerevisiae) OS=Mus musculus OX=10090 GN=Pop1 PE=1	2	27	27	27	26	19	23	22	27	24	26	19	23	22	27	24	26	19	23	22	27	24	35	35	35	114.03	1015	1015;1045	3.71	75	33	45	55	62	0	170.8	By MS/MS	By MS/MS	By MS/MS	By MS/MS	By MS/MS	By MS/MS
Q9CR16;A0A0A6YW70	Q9CR16	27;4	27;4	26;4	Peptidyl-prolyl cis-trans isomerase D	Ppid	sp|Q9CR16|PPID_MOUSE Peptidyl-prolyl cis-trans isomerase D OS=Mus musculus OX=10090 GN=Ppid PE=1 SV=3	2	27	27	26	21	22	23	24	23	26	21	22	23	24	23	26	20	21	22	23	22	25	73.8	73.8	70.3	40.742	370	370;73	3.27	153	51	99	67	64	0	270.08	By MS/MS	By MS/MS	By MS/MS	By MS/MS	By MS/MS	By MS/MS
P35601;Q5U4B1;A0A0N5E9G7;G3X8Z6;G3UWX1;A0A0N4SVN6	P35601;Q5U4B1;A0A0N5E9G7;G3X8Z6;G3UWX1	27;27;27;27;26;5	27;27;27;27;26;5	27;27;27;27;26;5	Replication factor C subunit 1	Rfc1	sp|P35601|RFC1_MOUSE Replication factor C subunit 1 OS=Mus musculus OX=10090 GN=Rfc1 PE=1 SV=2;tr|Q5U4B1|Q5U4B1_MOUSE Replication factor C subunit 1 OS=Mus musculus OX=10090 GN=Rfc1 PE=1 SV=1;tr|A0A0N5E9G7|A0A0N5E9G7_MOUSE Replication factor C subunit 1 OS	6	27	27	27	18	19	24	20	18	18	18	19	24	20	18	18	18	19	24	20	18	18	31	31	31	125.98	1131	1131;1132;1130;1131;1145;212	3.84	58	36	43	79	45	0	133.66	By MS/MS	By MS/MS	By MS/MS	By MS/MS	By MS/MS	By MS/MS
Q9D8E6	Q9D8E6	27	27	27	60S ribosomal protein L4	Rpl4	sp|Q9D8E6|RL4_MOUSE 60S ribosomal protein L4 OS=Mus musculus OX=10090 GN=Rpl4 PE=1 SV=3	1	27	27	27	24	23	25	25	26	25	24	23	25	25	26	25	24	23	25	25	26	25	51.6	51.6	51.6	47.153	419	419	3.37	196	32	59	92	110	0	189.67	By MS/MS	By MS/MS	By MS/MS	By MS/MS	By MS/MS	By MS/MS
P14148;F6XI62	P14148;F6XI62	27;23	27;23	27;23	60S ribosomal protein L7	Rpl7	sp|P14148|RL7_MOUSE 60S ribosomal protein L7 OS=Mus musculus OX=10090 GN=Rpl7 PE=1 SV=2;tr|F6XI62|F6XI62_MOUSE 60S ribosomal protein L7 (Fragment) OS=Mus musculus OX=10090 GN=Rpl7 PE=1 SV=1	2	27	27	27	22	25	25	25	25	23	22	25	25	25	25	23	22	25	25	25	25	23	64.8	64.8	64.8	31.419	270	270;279	3.54	183	34	43	86	138	0	228.83	By MS/MS	By MS/MS	By MS/MS	By MS/MS	By MS/MS	By MS/MS
Q9JLI8	Q9JLI8	27	27	27	Squamous cell carcinoma antigen recognized by T-cells 3	Sart3	sp|Q9JLI8|SART3_MOUSE Squamous cell carcinoma antigen recognized by T-cells 3 OS=Mus musculus OX=10090 GN=Sart3 PE=1 SV=1	1	27	27	27	21	24	25	17	21	22	21	24	25	17	21	22	21	24	25	17	21	22	38	38	38	109.62	962	962	3.53	64	33	35	29	49	0	216.79	By MS/MS	By MS/MS	By MS/MS	By MS/MS	By MS/MS	By MS/MS
O88974;D3YYC3;G5E8N3	O88974;D3YYC3;G5E8N3	27;27;27	27;27;27	27;27;27	Histone-lysine N-methyltransferase SETDB1	Setdb1	sp|O88974|SETB1_MOUSE Histone-lysine N-methyltransferase SETDB1 OS=Mus musculus OX=10090 GN=Setdb1 PE=1 SV=1;tr|D3YYC3|D3YYC3_MOUSE Histone-lysine N-methyltransferase SETDB1 OS=Mus musculus OX=10090 GN=Setdb1 PE=1 SV=1;tr|G5E8N3|G5E8N3_MOUSE Histone-lysine	3	27	27	27	17	15	15	12	15	15	17	15	15	12	15	15	17	15	15	12	15	15	26.8	26.8	26.8	144.55	1307	1307;1308;1307	4.28	21	17	11	40	38	0	87.799	By MS/MS	By MS/MS	By MS/MS	By MS/MS	By MS/MS	By MS/MS
F8VPK0;A0A286YDT1;A0A286YCU6	F8VPK0	27;2;1	27;2;1	27;2;1		Ttc37	tr|F8VPK0|F8VPK0_MOUSE Tetratricopeptide repeat domain 37 OS=Mus musculus OX=10090 GN=Ttc37 PE=1 SV=1	3	27	27	27	20	13	19	17	13	15	20	13	19	17	13	15	20	13	19	17	13	15	23	23	23	173.94	1563	1563;66;273	4.59	6	19	16	36	33	0	73.871	By MS/MS	By MS/MS	By MS/MS	By MS/MS	By MS/MS	By MS/MS
A2AWT5;P25976;A2AWT6;A2AWT7;E9Q4A8;G3UZW9	A2AWT5;P25976;A2AWT6;A2AWT7	27;26;25;25;10;8	27;26;25;25;10;8	27;26;25;25;10;8	Nucleolar transcription factor 1	Ubtf	tr|A2AWT5|A2AWT5_MOUSE Nucleolar transcription factor 1 OS=Mus musculus OX=10090 GN=Ubtf PE=1 SV=1;sp|P25976|UBF1_MOUSE Nucleolar transcription factor 1 OS=Mus musculus OX=10090 GN=Ubtf PE=1 SV=1;tr|A2AWT6|A2AWT6_MOUSE Nucleolar transcription factor 1 OS=M	6	27	27	27	24	23	25	21	22	21	24	23	25	21	22	21	24	23	25	21	22	21	33.8	33.8	33.8	89.478	764	764;765;727;752;169;151	3.79	128	27	69	83	119	0	200.26	By MS/MS	By MS/MS	By MS/MS	By MS/MS	By MS/MS	By MS/MS
P35123;A0A0A6YW28;A0A0A6YVY7;A0A0A6YWM7;A0A0A6YW63	P35123;A0A0A6YW28;A0A0A6YVY7	27;27;19;12;5	26;26;19;12;5	26;26;19;12;5	Ubiquitin carboxyl-terminal hydrolase 4;Ubiquitin carboxyl-terminal hydrolase	Usp4	sp|P35123|UBP4_MOUSE Ubiquitin carboxyl-terminal hydrolase 4 OS=Mus musculus OX=10090 GN=Usp4 PE=1 SV=3;tr|A0A0A6YW28|A0A0A6YW28_MOUSE Ubiquitin carboxyl-terminal hydrolase OS=Mus musculus OX=10090 GN=Usp4 PE=1 SV=1;tr|A0A0A6YVY7|A0A0A6YVY7_MOUSE Ubiquitin	5	27	26	26	18	15	21	16	19	18	18	15	20	16	18	18	18	15	20	16	18	18	41.3	40.3	40.3	108.34	962	962;915;734;394;190	3.83	32	43	36	19	45	0	123.93	By MS/MS	By MS/MS	By MS/MS	By MS/MS	By MS/MS	By MS/MS
P20152;A0A0A6YWC8;A2AKJ2;P31001;P08553;P15331;D3YZ35;G5E846;A0A2R8W6R6;G3X981;A0A0R4J036	P20152;A0A0A6YWC8	27;23;6;3;2;2;2;2;2;2;2	27;23;6;3;2;2;2;2;2;2;2	25;21;6;1;0;2;0;2;2;2;0	Vimentin	Vim	sp|P20152|VIME_MOUSE Vimentin OS=Mus musculus OX=10090 GN=Vim PE=1 SV=3;tr|A0A0A6YWC8|A0A0A6YWC8_MOUSE Vimentin OS=Mus musculus OX=10090 GN=Vim PE=1 SV=1	11	27	27	25	12	18	15	25	25	23	12	18	15	25	25	23	11	17	15	23	24	22	57.9	57.9	55.4	53.687	466	466;427;134;469;848;475;470;475;506;507;848	3.37	96	24	56	41	51	0	181.73	By MS/MS	By MS/MS	By MS/MS	By MS/MS	By MS/MS	By MS/MS
Q9Z2U2	Q9Z2U2	27	27	27	Zinc finger protein 292	Zfp292	sp|Q9Z2U2|ZN292_MOUSE Zinc finger protein 292 OS=Mus musculus OX=10090 GN=Zfp292 PE=1 SV=2	1	27	27	27	16	11	18	8	15	15	16	11	18	8	15	15	16	11	18	8	15	15	14	14	14	301.05	2698	2698	4.08	9	13	37	21	13	0	69.953	By MS/MS	By MS/MS	By MS/MS	By MS/MS	By MS/MS	By MS/MS
O54774;A0A1W2P6Q6	O54774	26;2	26;2	26;2	AP-3 complex subunit delta-1	Ap3d1	sp|O54774|AP3D1_MOUSE AP-3 complex subunit delta-1 OS=Mus musculus OX=10090 GN=Ap3d1 PE=1 SV=1	2	26	26	26	16	12	16	13	19	14	16	12	16	13	19	14	16	12	16	13	19	14	23.9	23.9	23.9	135.08	1199	1199;122	4.3	21	7	30	42	34	0	129.19	By MS/MS	By MS/MS	By MS/MS	By MS/MS	By MS/MS	By MS/MS
Q8CFQ3;A2AQA7	Q8CFQ3;A2AQA7	26;26	26;26	26;26	Intron-binding protein aquarius	Aqr	sp|Q8CFQ3|AQR_MOUSE RNA helicase aquarius OS=Mus musculus OX=10090 GN=Aqr PE=1 SV=2;tr|A2AQA7|A2AQA7_MOUSE RNA helicase aquarius OS=Mus musculus OX=10090 GN=Aqr PE=1 SV=1	2	26	26	26	13	17	16	20	14	17	13	17	16	20	14	17	13	17	16	20	14	17	25.4	25.4	25.4	170.29	1481	1481;1400	3.91	38	16	29	14	51	0	110.91	By MS/MS	By MS/MS	By MS/MS	By MS/MS	By MS/MS	By MS/MS
G3X963;Q8CDM1	G3X963;Q8CDM1	26;21	26;21	25;20	ATPase family AAA domain-containing protein 2	Atad2	tr|G3X963|G3X963_MOUSE ATPase family AAA domain-containing protein 2 OS=Mus musculus OX=10090 GN=Atad2 PE=1 SV=1;sp|Q8CDM1|ATAD2_MOUSE ATPase family AAA domain-containing protein 2 OS=Mus musculus OX=10090 GN=Atad2 PE=1 SV=1	2	26	26	25	22	21	24	16	18	15	22	21	24	16	18	15	21	20	23	15	18	15	25.8	25.8	24.6	155.28	1364	1364;1040	3.84	44	27	35	55	36	0	102.38	By MS/MS	By MS/MS	By MS/MS	By MS/MS	By MS/MS	By MS/MS
P14211	P14211	26	26	26	Calreticulin	Calr	sp|P14211|CALR_MOUSE Calreticulin OS=Mus musculus OX=10090 GN=Calr PE=1 SV=1	1	26	26	26	21	23	22	22	22	21	21	23	22	22	22	21	21	23	22	22	22	21	68.5	68.5	68.5	47.994	416	416	3.46	181	31	145	110	83	0	323.31	By MS/MS	By MS/MS	By MS/MS	By MS/MS	By MS/MS	By MS/MS
Q8CH18;A0A1W2P765;A0A1W2P7Q7	Q8CH18	26;4;1	26;4;1	26;4;1	Cell division cycle and apoptosis regulator protein 1	Ccar1	sp|Q8CH18|CCAR1_MOUSE Cell division cycle and apoptosis regulator protein 1 OS=Mus musculus OX=10090 GN=Ccar1 PE=1 SV=1	3	26	26	26	19	17	21	18	20	14	19	17	21	18	20	14	19	17	21	18	20	14	25.6	25.6	25.6	132.06	1146	1146;198;161	3.73	68	16	49	47	55	0	103.44	By MS/MS	By MS/MS	By MS/MS	By MS/MS	By MS/MS	By MS/MS
P80317;A0A571BEL9	P80317;A0A571BEL9	26;22	26;22	22;18	T-complex protein 1 subunit zeta	Cct6a	sp|P80317|TCPZ_MOUSE T-complex protein 1 subunit zeta OS=Mus musculus OX=10090 GN=Cct6a PE=1 SV=3;tr|A0A571BEL9|A0A571BEL9_MOUSE T-complex protein 1 subunit zeta OS=Mus musculus OX=10090 GN=Cct6a PE=1 SV=1	2	26	26	22	21	22	24	22	24	21	21	22	24	22	24	21	17	18	20	18	20	17	65.5	65.5	59.7	58.004	531	531;532	3.75	170	57	163	150	126	0	323.31	By MS/MS	By MS/MS	By MS/MS	By MS/MS	By MS/MS	By MS/MS
Q09XV5	Q09XV5	26	26	14	Chromodomain-helicase-DNA-binding protein 8	Chd8	sp|Q09XV5|CHD8_MOUSE Chromodomain-helicase-DNA-binding protein 8 OS=Mus musculus OX=10090 GN=Chd8 PE=1 SV=1	1	26	26	14	16	15	18	13	20	16	16	15	18	13	20	16	8	7	7	7	9	7	14.3	14.3	9.3	290.84	2582	2582	4.07	22	7	37	30	26	0	103.46	By MS/MS	By MS/MS	By MS/MS	By MS/MS	By MS/MS	By MS/MS
Q9JLV5;E9Q4T8;F6ZZK0;F6UY44;F6R0N8	Q9JLV5;E9Q4T8	26;23;3;3;1	26;23;3;3;1	26;23;3;3;1	Cullin-3	Cul3	sp|Q9JLV5|CUL3_MOUSE Cullin-3 OS=Mus musculus OX=10090 GN=Cul3 PE=1 SV=1;tr|E9Q4T8|E9Q4T8_MOUSE Cullin-3 OS=Mus musculus OX=10090 GN=Cul3 PE=1 SV=1	5	26	26	26	19	20	22	19	18	19	19	20	22	19	18	19	19	20	22	19	18	19	38.7	38.7	38.7	88.947	768	768;702;85;111;54	4.06	55	7	15	60	62	0	124.6	By MS/MS	By MS/MS	By MS/MS	By MS/MS	By MS/MS	By MS/MS
Q8VDW0;D6RHT5	Q8VDW0	26;10	13;6	13;6	ATP-dependent RNA helicase DDX39A	Ddx39a	sp|Q8VDW0|DX39A_MOUSE ATP-dependent RNA helicase DDX39A OS=Mus musculus OX=10090 GN=Ddx39a PE=1 SV=1	2	26	13	13	21	24	26	23	22	20	11	11	13	10	10	11	11	11	13	10	10	11	68.9	43.6	43.6	49.067	427	427;208	3.51	78	46	73	40	50	0	143.41	By MS/MS	By MS/MS	By MS/MS	By MS/MS	By MS/MS	By MS/MS
Q810A7	Q810A7	26	26	26	ATP-dependent RNA helicase DDX42	Ddx42	sp|Q810A7|DDX42_MOUSE ATP-dependent RNA helicase DDX42 OS=Mus musculus OX=10090 GN=Ddx42 PE=1 SV=3	1	26	26	26	22	17	22	21	22	21	22	17	22	21	22	21	22	17	22	21	22	21	39.6	39.6	39.6	101.96	929	929	3.42	85	25	62	49	40	0	188.58	By MS/MS	By MS/MS	By MS/MS	By MS/MS	By MS/MS	By MS/MS
Q9QYI3;A0A6I8MX00;A0A6I8MWX8;A0A6I8MWY7;A0A6I8MWZ1;F7BTP8;A0A6I8MWZ9;A2A5E1;A0A6I8MWW2;A0A6I8MX31;A0A6I8MWZ5;A0A6I8MWW0	Q9QYI3;A0A6I8MX00;A0A6I8MWX8;A0A6I8MWY7;A0A6I8MWZ1;F7BTP8;A0A6I8MWZ9	26;24;24;22;20;17;17;10;10;10;8;3	26;24;24;22;20;17;17;10;10;10;8;3	26;24;24;22;20;17;17;10;10;10;8;3	DnaJ homolog subfamily C member 7	Dnajc7	sp|Q9QYI3|DNJC7_MOUSE DnaJ homolog subfamily C member 7 OS=Mus musculus OX=10090 GN=Dnajc7 PE=1 SV=2;tr|A0A6I8MX00|A0A6I8MX00_MOUSE DnaJ homolog subfamily C member 7 OS=Mus musculus OX=10090 GN=Dnajc7 PE=4 SV=1;tr|A0A6I8MWX8|A0A6I8MWX8_MOUSE DnaJ homolog s	12	26	26	26	23	22	22	24	21	23	23	22	22	24	21	23	23	22	22	24	21	23	59.3	59.3	59.3	56.475	494	494;484;579;347;438;259;315;147;156;159;115;104	3.24	128	56	81	58	49	0	216.11	By MS/MS	By MS/MS	By MS/MS	By MS/MS	By MS/MS	By MS/MS
Q6ZWX6	Q6ZWX6	26	26	26	Eukaryotic translation initiation factor 2 subunit 1	Eif2s1	sp|Q6ZWX6|IF2A_MOUSE Eukaryotic translation initiation factor 2 subunit 1 OS=Mus musculus OX=10090 GN=Eif2s1 PE=1 SV=3	1	26	26	26	21	24	19	24	23	21	21	24	19	24	23	21	21	24	19	24	23	21	72.1	72.1	72.1	36.108	315	315	3.04	153	47	73	68	38	0	249.94	By MS/MS	By MS/MS	By MS/MS	By MS/MS	By MS/MS	By MS/MS
Q80UE5;O70318;Q80UE4;Q8C928;A0A1W2P6I5;A0A1W2P7I4;A0A1W2P896;A0A1W2P7H7;A0A1W2P7I2;A0A1W2P8C0	Q80UE5;O70318;Q80UE4;Q8C928;A0A1W2P6I5	26;25;22;20;18;6;5;5;2;1	26;25;22;20;18;6;5;5;2;1	23;22;19;17;15;6;5;5;2;1	Band 4.1-like protein 2	Epb4.1l2;Epb41l2	tr|Q80UE5|Q80UE5_MOUSE Band 4.1-like protein 2 OS=Mus musculus OX=10090 GN=Epb41l2 PE=1 SV=1;sp|O70318|E41L2_MOUSE Band 4.1-like protein 2 OS=Mus musculus OX=10090 GN=Epb41l2 PE=1 SV=2;tr|Q80UE4|Q80UE4_MOUSE Band 4.1-like protein 2 OS=Mus musculus OX=10090	10	26	26	23	24	21	22	19	18	18	24	21	22	19	18	18	21	20	19	17	16	16	35.1	35.1	32.5	101.81	918	918;988;794;806;513;144;95;113;201;204	3.76	51	34	30	47	45	0	198.05	By MS/MS	By MS/MS	By MS/MS	By MS/MS	By MS/MS	By MS/MS
Q8CHY6;E9QMN5;A0A1I7Q4G8;A0A1D5RM58;A0A1D5RM07	Q8CHY6;E9QMN5;A0A1I7Q4G8	26;26;25;8;6	26;26;25;8;6	25;25;24;8;6	Transcriptional repressor p66 alpha	Gatad2a	sp|Q8CHY6|P66A_MOUSE Transcriptional repressor p66 alpha OS=Mus musculus OX=10090 GN=Gatad2a PE=1 SV=2;tr|E9QMN5|E9QMN5_MOUSE Transcriptional repressor p66 alpha OS=Mus musculus OX=10090 GN=Gatad2a PE=1 SV=1;tr|A0A1I7Q4G8|A0A1I7Q4G8_MOUSE Transcriptional r	5	26	26	25	24	19	21	15	23	23	24	19	21	15	23	23	23	19	21	15	23	22	51	51	49.4	67.333	629	629;630;614;161;99	3.48	81	25	71	57	35	0	276.27	By MS/MS	By MS/MS	By MS/MS	By MS/MS	By MS/MS	By MS/MS
S4R1W1	S4R1W1	26	1	1	Glyceraldehyde-3-phosphate dehydrogenase	Gm3839	tr|S4R1W1|S4R1W1_MOUSE Glyceraldehyde-3-phosphate dehydrogenase OS=Mus musculus OX=10090 GN=Gm3839 PE=1 SV=1	1	26	1	1	22	25	24	23	24	25	1	1	1	1	1	1	1	1	1	1	1	1	81.7	5.1	5.1	35.812	333	333	2.93	12	26	18	1		0	10.394	By MS/MS	By MS/MS	By MS/MS	By MS/MS	By MS/MS	By MS/MS
Q6DFV5;A2AAU5	Q6DFV5	26;8	26;8	26;8	Probable helicase with zinc finger domain	Helz	sp|Q6DFV5|HELZ_MOUSE Probable helicase with zinc finger domain OS=Mus musculus OX=10090 GN=Helz PE=1 SV=2	2	26	26	26	15	14	13	17	10	15	15	14	13	17	10	15	15	14	13	17	10	15	17.7	17.7	17.7	219.88	1964	1964;935	4.39	11	12	13	41	21	0	61.591	By MS/MS	By MS/MS	By MS/MS	By MS/MS	By MS/MS	By MS/MS
O88569;A0A0N4SUM2	O88569	26;10	26;10	26;10	Heterogeneous nuclear ribonucleoproteins A2/B1	Hnrnpa2b1	sp|O88569|ROA2_MOUSE Heterogeneous nuclear ribonucleoproteins A2/B1 OS=Mus musculus OX=10090 GN=Hnrnpa2b1 PE=1 SV=2	2	26	26	26	24	23	25	26	25	24	24	23	25	26	25	24	24	23	25	26	25	24	55.5	55.5	55.5	37.402	353	353;155	3.46	241	80	118	146	135	0	323.31	By MS/MS	By MS/MS	By MS/MS	By MS/MS	By MS/MS	By MS/MS
Q8VHM5;F7B5B5;A2AW41;S4R1E9;A2AW40;V9GWW3	Q8VHM5;F7B5B5;A2AW41	26;22;15;3;3;3	19;16;10;1;3;3	19;16;10;1;3;3		Hnrnpr	tr|Q8VHM5|Q8VHM5_MOUSE Heterogeneous nuclear ribonucleoprotein R OS=Mus musculus OX=10090 GN=Hnrnpr PE=1 SV=1;tr|F7B5B5|F7B5B5_MOUSE Heterogeneous nuclear ribonucleoprotein R OS=Mus musculus OX=10090 GN=Hnrnpr PE=1 SV=1;tr|A2AW41|A2AW41_MOUSE Heterogeneous	6	26	19	19	20	19	24	20	19	20	14	12	17	14	12	13	14	12	17	14	12	13	43	35	35	70.887	632	632;531;270;72;73;103	3.58	63	4	60	45	31	0	198.65	By MS/MS	By MS/MS	By MS/MS	By MS/MS	By MS/MS	By MS/MS
Q8BRB7;A0A5F8MQ39;Q14AW2;S4R2Q8	Q8BRB7;A0A5F8MQ39	26;26;3;1	26;26;3;1	23;23;3;1	Histone acetyltransferase KAT6B	Kat6b	sp|Q8BRB7|KAT6B_MOUSE Histone acetyltransferase KAT6B OS=Mus musculus OX=10090 GN=Kat6b PE=1 SV=3;tr|A0A5F8MQ39|A0A5F8MQ39_MOUSE Histone acetyltransferase OS=Mus musculus OX=10090 GN=Kat6b PE=1 SV=1	4	26	26	23	19	14	21	11	17	14	19	14	21	11	17	14	17	11	19	8	14	12	20.2	20.2	18.6	208.52	1872	1872;2054;179;79	4.34	21	13	11	42	38	0	79.351	By MS/MS	By MS/MS	By MS/MS	By MS/MS	By MS/MS	By MS/MS
Q3U0V1;A0A3B2WCD8;A0A3B2W465;A0A0G2JE55;A0A0G2JGT1	Q3U0V1;A0A3B2WCD8	26;26;7;1;1	26;26;7;1;1	25;25;7;0;0	Far upstream element-binding protein 2	Khsrp	sp|Q3U0V1|FUBP2_MOUSE Far upstream element-binding protein 2 OS=Mus musculus OX=10090 GN=Khsrp PE=1 SV=2;tr|A0A3B2WCD8|A0A3B2WCD8_MOUSE Far upstream element-binding protein 2 OS=Mus musculus OX=10090 GN=Khsrp PE=1 SV=1	5	26	26	25	22	25	26	23	25	26	22	25	26	23	25	26	21	24	25	22	24	25	36.8	36.8	34.9	76.775	748	748;721;238;142;157	3.09	149	53	94	79	27	0	323.31	By MS/MS	By MS/MS	By MS/MS	By MS/MS	By MS/MS	By MS/MS
Q5DTW7;A0A087WP74;A0A087WP47;A0A140T8R9	Q5DTW7;A0A087WP74;A0A087WP47	26;25;20;5	26;25;20;5	26;25;20;5	Uncharacterized protein KIAA1551	Kiaa1551;2810474O19Rik	sp|Q5DTW7|RESF1_MOUSE Retroelement silencing factor 1 OS=Mus musculus OX=10090 GN=Resf1 PE=1 SV=2;tr|A0A087WP74|A0A087WP74_MOUSE Retroelement silencing factor 1 OS=Mus musculus OX=10090 GN=Resf1 PE=1 SV=1;tr|A0A087WP47|A0A087WP47_MOUSE Retroelement silenci	4	26	26	26	20	20	21	12	19	15	20	20	21	12	19	15	20	20	21	12	19	15	28.3	28.3	28.3	169.04	1521	1521;1519;1173;404	3.65	41	31	29	34	31	0	136.38	By MS/MS	By MS/MS	By MS/MS	By MS/MS	By MS/MS	By MS/MS
A0A0A0MQ73;Q6PDK2;V9GX77;A0A0A6YY77	A0A0A0MQ73;Q6PDK2	26;25;3;1	26;25;3;1	26;25;3;1	Histone-lysine N-methyltransferase;Histone-lysine N-methyltransferase 2D	Kmt2d	tr|A0A0A0MQ73|A0A0A0MQ73_MOUSE [Histone H3]-lysine(4) N-trimethyltransferase OS=Mus musculus OX=10090 GN=Kmt2d PE=1 SV=1;sp|Q6PDK2|KMT2D_MOUSE Histone-lysine N-methyltransferase 2D OS=Mus musculus OX=10090 GN=Kmt2d PE=1 SV=2	4	26	26	26	19	8	14	8	13	13	19	8	14	8	13	13	19	8	14	8	13	13	8.1	8.1	8.1	600.3	5588	5588;5588;250;233	3.99	7	20	28	10	15	0	65.569	By MS/MS	By MS/MS	By MS/MS	By MS/MS	By MS/MS	By MS/MS
Q9R190	Q9R190	26	26	22	Metastasis-associated protein MTA2	Mta2	sp|Q9R190|MTA2_MOUSE Metastasis-associated protein MTA2 OS=Mus musculus OX=10090 GN=Mta2 PE=1 SV=1	1	26	26	22	18	19	25	20	23	22	18	19	25	20	23	22	16	16	21	17	20	20	50.1	50.1	47	75.029	668	668	3.45	101	8	43	50	59	0	204.3	By MS/MS	By MS/MS	By MS/MS	By MS/MS	By MS/MS	By MS/MS
Q9JLN9	Q9JLN9	26	26	26	Serine/threonine-protein kinase mTOR	Mtor	sp|Q9JLN9|MTOR_MOUSE Serine/threonine-protein kinase mTOR OS=Mus musculus OX=10090 GN=Mtor PE=1 SV=2	1	26	26	26	12	18	21	6	11	8	12	18	21	6	11	8	12	18	21	6	11	8	14.9	14.9	14.9	288.79	2549	2549	4.55	9	11	19	26	33	0	94.465	By MS/MS	By MS/MS	By MS/MS	By MS/MS	By MS/MS	By MS/MS
Q11011;E9Q039;F6QYF8;E9Q6F4;F7ANF4;F6V7K3	Q11011;E9Q039;F6QYF8;E9Q6F4	26;23;22;17;4;4	26;23;22;17;4;4	26;23;22;17;4;4	Puromycin-sensitive aminopeptidase	Npepps	sp|Q11011|PSA_MOUSE Puromycin-sensitive aminopeptidase OS=Mus musculus OX=10090 GN=Npepps PE=1 SV=2;tr|E9Q039|E9Q039_MOUSE Aminopeptidase OS=Mus musculus OX=10090 GN=Npepps PE=1 SV=1;tr|F6QYF8|F6QYF8_MOUSE Aminopeptidase (Fragment) OS=Mus musculus OX=10090	6	26	26	26	22	23	25	25	23	24	22	23	25	25	23	24	22	23	25	25	23	24	33	33	33	103.32	920	920;889;876;674;218;247	3.87	120	4	63	98	107	0	188.69	By MS/MS	By MS/MS	By MS/MS	By MS/MS	By MS/MS	By MS/MS
Q8BH74;E9Q4V9;A0A1W2P7R1	Q8BH74;E9Q4V9	26;25;6	26;25;6	26;25;6	Nuclear pore complex protein Nup107	Nup107	sp|Q8BH74|NU107_MOUSE Nuclear pore complex protein Nup107 OS=Mus musculus OX=10090 GN=Nup107 PE=1 SV=1;tr|E9Q4V9|E9Q4V9_MOUSE Nuclear pore complex protein OS=Mus musculus OX=10090 GN=Nup107 PE=1 SV=1	3	26	26	26	19	20	21	20	18	17	19	20	21	20	18	17	19	20	21	20	18	17	36.2	36.2	36.2	106.72	926	926;924;336	3.77	55	20	30	38	51	0	116.43	By MS/MS	By MS/MS	By MS/MS	By MS/MS	By MS/MS	By MS/MS
Q60597;Z4YJV4;Q5SVY0;Q5SVY1	Q60597;Z4YJV4	26;25;4;1	26;25;4;1	20;19;4;1	2-oxoglutarate dehydrogenase, mitochondrial	Ogdh	sp|Q60597|ODO1_MOUSE 2-oxoglutarate dehydrogenase, mitochondrial OS=Mus musculus OX=10090 GN=Ogdh PE=1 SV=3;tr|Z4YJV4|Z4YJV4_MOUSE 2-oxoglutarate dehydrogenase, mitochondrial OS=Mus musculus OX=10090 GN=Ogdh PE=1 SV=1	4	26	26	20	16	19	24	20	21	16	16	19	24	20	21	16	13	13	18	16	17	15	32.6	32.6	26.9	116.45	1023	1023;1019;123;84	4.48	37	8	15	35	85	0	98.966	By MS/MS	By MS/MS	By MS/MS	By MS/MS	By MS/MS	By MS/MS
P50580	P50580	26	26	26	Proliferation-associated protein 2G4	Pa2g4	sp|P50580|PA2G4_MOUSE Proliferation-associated protein 2G4 OS=Mus musculus OX=10090 GN=Pa2g4 PE=1 SV=3	1	26	26	26	25	26	26	25	26	25	25	26	26	25	26	25	25	26	26	25	26	25	68	68	68	43.698	394	394	3.31	234	90	75	53	158	0	323.31	By MS/MS	By MS/MS	By MS/MS	By MS/MS	By MS/MS	By MS/MS
Q8BSQ9;F8VQD1;E9Q7L3;D3Z1W6;E9Q7L2;D3Z1N4;E9Q4Y5;D3YYF2;F6THL5;D3Z3R4;D6RIL0;D6RI94	Q8BSQ9;F8VQD1;E9Q7L3;D3Z1W6;E9Q7L2;D3Z1N4;E9Q4Y5;D3YYF2;F6THL5;D3Z3R4;D6RIL0;D6RI94	26;26;26;26;26;26;26;23;18;15;14;14	26;26;26;26;26;26;26;23;18;15;14;14	26;26;26;26;26;26;26;23;18;15;14;14	Protein polybromo-1	Pbrm1	sp|Q8BSQ9|PB1_MOUSE Protein polybromo-1 OS=Mus musculus OX=10090 GN=Pbrm1 PE=1 SV=4;tr|F8VQD1|F8VQD1_MOUSE Protein polybromo-1 OS=Mus musculus OX=10090 GN=Pbrm1 PE=1 SV=1;tr|E9Q7L3|E9Q7L3_MOUSE Protein polybromo-1 OS=Mus musculus OX=10090 GN=Pbrm1 PE=1 SV=	12	26	26	26	17	17	19	16	18	15	17	17	19	16	18	15	17	17	19	16	18	15	20.3	20.3	20.3	187.19	1634	1634;1704;1582;1582;1597;1652;1689;1460;1085;931;856;860	3.78	28	26	37	28	25	0	64.573	By MS/MS	By MS/MS	By MS/MS	By MS/MS	By MS/MS	By MS/MS
B2RQG2;A0A087WP76;A0A087WRR9;A0A087WS81	B2RQG2	26;2;1;1	26;2;1;1	26;2;1;1		Phf3	tr|B2RQG2|B2RQG2_MOUSE PHD finger protein 3 OS=Mus musculus OX=10090 GN=Phf3 PE=1 SV=1	4	26	26	26	21	16	21	14	18	20	21	16	21	14	18	20	21	16	21	14	18	20	17.2	17.2	17.2	225.54	2025	2025;111;154;199	3.67	19	57	28	41	11	0	90.289	By MS/MS	By MS/MS	By MS/MS	By MS/MS	By MS/MS	By MS/MS
P27612;F7D1R5	P27612	26;9	26;9	26;9	Phospholipase A-2-activating protein	Plaa	sp|P27612|PLAP_MOUSE Phospholipase A-2-activating protein OS=Mus musculus OX=10090 GN=Plaa PE=1 SV=4	2	26	26	26	18	22	18	17	20	19	18	22	18	17	20	19	18	22	18	17	20	19	38.8	38.8	38.8	87.22	794	794;214	3.55	83	29	48	70	43	0	231.8	By MS/MS	By MS/MS	By MS/MS	By MS/MS	By MS/MS	By MS/MS
B2RXC6;Q7TSI4	B2RXC6	26;11	26;11	26;11	DNA-directed RNA polymerase	Polr3a	tr|B2RXC6|B2RXC6_MOUSE DNA-directed RNA polymerase subunit OS=Mus musculus OX=10090 GN=Polr3a PE=1 SV=1	2	26	26	26	12	15	22	16	16	16	12	15	22	16	16	16	12	15	22	16	16	16	23.5	23.5	23.5	155.74	1390	1390;649	3.96	37	8	23	23	45	0	63.796	By MS/MS	By MS/MS	By MS/MS	By MS/MS	By MS/MS	By MS/MS
Q91YQ5;A0A0N4SUJ8	Q91YQ5	26;3	26;3	26;3	Dolichyl-diphosphooligosaccharide--protein glycosyltransferase subunit 1	Rpn1	sp|Q91YQ5|RPN1_MOUSE Dolichyl-diphosphooligosaccharide--protein glycosyltransferase subunit 1 OS=Mus musculus OX=10090 GN=Rpn1 PE=1 SV=1	2	26	26	26	19	25	25	23	22	21	19	25	25	23	22	21	19	25	25	23	22	21	51.8	51.8	51.8	68.527	608	608;90	3.49	142	20	48	58	100	0	153.39	By MS/MS	By MS/MS	By MS/MS	By MS/MS	By MS/MS	By MS/MS
P62908;D3YV43;A0A140LI77	P62908;D3YV43;A0A140LI77	26;17;14	26;17;14	26;17;14	40S ribosomal protein S3	Rps3	sp|P62908|RS3_MOUSE 40S ribosomal protein S3 OS=Mus musculus OX=10090 GN=Rps3 PE=1 SV=1;tr|D3YV43|D3YV43_MOUSE 40S ribosomal protein S3 OS=Mus musculus OX=10090 GN=Rps3 PE=1 SV=1;tr|A0A140LI77|A0A140LI77_MOUSE 40S ribosomal protein S3 OS=Mus musculus OX=10	3	26	26	26	22	25	25	23	24	24	22	25	25	23	24	24	22	25	25	23	24	24	88.1	88.1	88.1	26.674	243	243;191;144	3.5	207	57	48	122	135	0	225.36	By MS/MS	By MS/MS	By MS/MS	By MS/MS	By MS/MS	By MS/MS
P62702;V9GWY0	P62702	26;12	26;12	26;12	40S ribosomal protein S4, X isoform	Rps4x	sp|P62702|RS4X_MOUSE 40S ribosomal protein S4, X isoform OS=Mus musculus OX=10090 GN=Rps4x PE=1 SV=2	2	26	26	26	20	22	22	25	25	25	20	22	22	25	25	25	20	22	22	25	25	25	74.5	74.5	74.5	29.597	263	263;266	3.19	242	73	63	76	127	0	308.59	By MS/MS	By MS/MS	By MS/MS	By MS/MS	By MS/MS	By MS/MS
Q61466;A0A2R8VKP3;A0A2R8VI06;A0A2R8VHB7;A0A2R8VI28	Q61466;A0A2R8VKP3	26;23;9;5;5	26;23;9;5;5	20;17;6;2;2	SWI/SNF-related matrix-associated actin-dependent regulator of chromatin subfamily D member 1	Smarcd1	sp|Q61466|SMRD1_MOUSE SWI/SNF-related matrix-associated actin-dependent regulator of chromatin subfamily D member 1 OS=Mus musculus OX=10090 GN=Smarcd1 PE=1 SV=3;tr|A0A2R8VKP3|A0A2R8VKP3_MOUSE SWI/SNF-related matrix-associated actin-dependent regulator of	5	26	26	20	23	18	21	16	19	17	23	18	21	16	19	17	17	13	16	13	15	13	51.7	51.7	42.1	58.244	515	515;474;175;95;98	3.4	92	25	41	30	61	0	179.34	By MS/MS	By MS/MS	By MS/MS	By MS/MS	By MS/MS	By MS/MS
Q3UE92;Q6P1B1;S4R1I3;A0A494BBG8;S4R228	Q3UE92;Q6P1B1;S4R1I3;A0A494BBG8	26;25;24;23;4	26;25;24;23;4	25;24;23;22;4	Xaa-Pro aminopeptidase 1	Xpnpep1	tr|Q3UE92|Q3UE92_MOUSE Xaa-Pro aminopeptidase 1 OS=Mus musculus OX=10090 GN=Xpnpep1 PE=1 SV=1;sp|Q6P1B1|XPP1_MOUSE Xaa-Pro aminopeptidase 1 OS=Mus musculus OX=10090 GN=Xpnpep1 PE=1 SV=1;tr|S4R1I3|S4R1I3_MOUSE Xaa-Pro aminopeptidase 1 OS=Mus musculus OX=100	5	26	26	25	16	19	22	19	14	16	16	19	22	19	14	16	16	18	21	18	14	15	46.7	46.7	45.6	74.559	666	666;623;635;587;119	3.41	69	48	62	38	34	0	152.69	By MS/MS	By MS/MS	By MS/MS	By MS/MS	By MS/MS	By MS/MS
P27641	P27641	26	26	26	X-ray repair cross-complementing protein 5	Xrcc5	sp|P27641|XRCC5_MOUSE X-ray repair cross-complementing protein 5 OS=Mus musculus OX=10090 GN=Xrcc5 PE=1 SV=4	1	26	26	26	19	21	21	20	18	18	19	21	21	20	18	18	19	21	21	20	18	18	37.6	37.6	37.6	83.056	732	732	3.99	52	9	38	43	60	0	111.06	By MS/MS	By MS/MS	By MS/MS	By MS/MS	By MS/MS	By MS/MS
Q9DBR1	Q9DBR1	26	26	26	5-3 exoribonuclease 2	Xrn2	sp|Q9DBR1|XRN2_MOUSE 5-3 exoribonuclease 2 OS=Mus musculus OX=10090 GN=Xrn2 PE=1 SV=1	1	26	26	26	20	18	23	19	22	20	20	18	23	19	22	20	20	18	23	19	22	20	36.7	36.7	36.7	108.69	951	951	3.6	73	19	39	41	53	0	152.44	By MS/MS	By MS/MS	By MS/MS	By MS/MS	By MS/MS	By MS/MS
Q6PGF5	Q6PGF5	25	25	25		Bms1	tr|Q6PGF5|Q6PGF5_MOUSE BMS1 homolog, ribosome assembly protein (Yeast) OS=Mus musculus OX=10090 GN=Bms1 PE=1 SV=1	1	25	25	25	22	18	22	20	20	20	22	18	22	20	20	20	22	18	22	20	20	20	30.2	30.2	30.2	145.41	1284	1284	3.73	100	11	28	31	103	0	181.45	By MS/MS	By MS/MS	By MS/MS	By MS/MS	By MS/MS	By MS/MS
P40124;B1ARS0;Q9CYT6;D3YTR7;A0A286YCS6	P40124	25;7;1;1;1	25;7;1;1;1	25;7;1;1;1	Adenylyl cyclase-associated protein 1	Cap1	sp|P40124|CAP1_MOUSE Adenylyl cyclase-associated protein 1 OS=Mus musculus OX=10090 GN=Cap1 PE=1 SV=4	5	25	25	25	22	20	22	20	23	23	22	20	22	20	23	23	22	20	22	20	23	23	58.6	58.6	58.6	51.564	474	474;164;476;364;421	3.24	121	49	58	46	57	0	260.43	By MS/MS	By MS/MS	By MS/MS	By MS/MS	By MS/MS	By MS/MS
O88544;F6QTS1;D3YV99;D3Z1R9;D6RG47	O88544;F6QTS1;D3YV99	25;15;13;10;2	25;15;13;10;2	25;15;13;10;2	COP9 signalosome complex subunit 4	Cops4	sp|O88544|CSN4_MOUSE COP9 signalosome complex subunit 4 OS=Mus musculus OX=10090 GN=Cops4 PE=1 SV=1;tr|F6QTS1|F6QTS1_MOUSE COP9 signalosome complex subunit 4 (Fragment) OS=Mus musculus OX=10090 GN=Cops4 PE=1 SV=1;tr|D3YV99|D3YV99_MOUSE COP9 signalosome com	5	25	25	25	18	18	23	21	22	19	18	18	23	21	22	19	18	18	23	21	22	19	73.6	73.6	73.6	46.284	406	406;253;244;206;36	3.82	81	28	34	39	91	0	234.89	By MS/MS	By MS/MS	By MS/MS	By MS/MS	By MS/MS	By MS/MS
Q6P1J1;P97427;A0A0J9YTX5;A0A0J9YUZ1;Q71H75;A0A0R4J1N0	Q6P1J1;P97427	25;24;6;5;2;1	25;24;6;5;2;1	20;19;6;5;1;0	Dihydropyrimidinase-related protein 1	Crmp1	tr|Q6P1J1|Q6P1J1_MOUSE Crmp1 protein OS=Mus musculus OX=10090 GN=Crmp1 PE=1 SV=1;sp|P97427|DPYL1_MOUSE Dihydropyrimidinase-related protein 1 OS=Mus musculus OX=10090 GN=Crmp1 PE=1 SV=1	6	25	25	20	20	19	23	15	19	17	20	19	23	15	19	17	15	15	18	11	14	13	52.3	52.3	44.6	74.22	686	686;572;157;143;191;593	3.65	76	48	46	30	75	0	246.22	By MS/MS	By MS/MS	By MS/MS	By MS/MS	By MS/MS	By MS/MS
A0A0R4J1Q0;G5E896;Q3UJB9;D6RE33;F6ZJ27;F6V5I7	A0A0R4J1Q0;G5E896;Q3UJB9;D6RE33	25;25;24;20;4;3	25;25;24;20;4;3	25;25;24;20;4;3	Enhancer of mRNA-decapping protein 4	Edc4	tr|A0A0R4J1Q0|A0A0R4J1Q0_MOUSE Enhancer of mRNA-decapping protein 4 OS=Mus musculus OX=10090 GN=Edc4 PE=1 SV=1;tr|G5E896|G5E896_MOUSE Enhancer of mRNA-decapping protein 4 OS=Mus musculus OX=10090 GN=Edc4 PE=1 SV=1;sp|Q3UJB9|EDC4_MOUSE Enhancer of mRNA-deca	6	25	25	25	17	14	16	14	18	16	17	14	16	14	18	16	17	14	16	14	18	16	21.8	21.8	21.8	150.65	1390	1390;1406;1406;1318;427;265	3.86	49	12	28	29	53	0	132.63	By MS/MS	By MS/MS	By MS/MS	By MS/MS	By MS/MS	By MS/MS
Q9Z0N1;A2AAW9	Q9Z0N1;A2AAW9	25;15	25;15	8;6	Eukaryotic translation initiation factor 2 subunit 3, X-linked	Eif2s3x	sp|Q9Z0N1|IF2G_MOUSE Eukaryotic translation initiation factor 2 subunit 3, X-linked OS=Mus musculus OX=10090 GN=Eif2s3x PE=1 SV=2;tr|A2AAW9|A2AAW9_MOUSE Eukaryotic translation initiation factor 2 subunit 3, X-linked OS=Mus musculus OX=10090 GN=Eif2s3x PE=1	2	25	25	8	21	25	25	24	24	22	21	25	25	24	24	22	8	8	8	8	8	8	53.6	53.6	16.9	51.065	472	472;344	3.36	155	27	48	68	88	0	278.92	By MS/MS	By MS/MS	By MS/MS	By MS/MS	By MS/MS	By MS/MS
Q91WJ8;Q3TUE1;A0A0G2JGW9;A0A0G2JFY5;Q3UUU2;A0A0G2JG00;A0A0G2JFK2;A0A0G2JG96;A0A0G2JGV9	Q91WJ8;Q3TUE1;A0A0G2JGW9;A0A0G2JFY5;Q3UUU2;A0A0G2JG00;A0A0G2JFK2	25;25;25;25;25;24;15;7;2	24;24;24;24;24;24;15;7;2	24;24;24;24;24;24;15;7;2	Far upstream element-binding protein 1	Fubp1	sp|Q91WJ8|FUBP1_MOUSE Far upstream element-binding protein 1 OS=Mus musculus OX=10090 GN=Fubp1 PE=1 SV=1;tr|Q3TUE1|Q3TUE1_MOUSE Far upstream element-binding protein 1 OS=Mus musculus OX=10090 GN=Fubp1 PE=1 SV=1;tr|A0A0G2JGW9|A0A0G2JGW9_MOUSE Far upstream e	9	25	24	24	22	20	22	21	24	24	21	19	21	20	23	23	21	19	21	20	23	23	38.2	37.2	37.2	68.539	651	651;642;643;654;700;523;306;149;69	2.99	112	64	49	59	18	0	323.31	By MS/MS	By MS/MS	By MS/MS	By MS/MS	By MS/MS	By MS/MS
Q8CI11;A0A2I3BPZ6;A0A2I3BRV9;A0A2I3BR32;A0A2I3BR82	Q8CI11	25;7;5;5;4	25;7;5;5;4	25;7;5;5;4	Guanine nucleotide-binding protein-like 3	Gnl3	sp|Q8CI11|GNL3_MOUSE Guanine nucleotide-binding protein-like 3 OS=Mus musculus OX=10090 GN=Gnl3 PE=1 SV=2	5	25	25	25	21	20	21	19	19	18	21	20	21	19	19	18	21	20	21	19	19	18	50.4	50.4	50.4	60.786	538	538;156;146;159;136	3.41	81	44	61	33	48	0	177.03	By MS/MS	By MS/MS	By MS/MS	By MS/MS	By MS/MS	By MS/MS
Q64521;A2AQR0	Q64521;A2AQR0	25;25	25;25	25;25	Glycerol-3-phosphate dehydrogenase, mitochondrial;Glycerol-3-phosphate dehydrogenase	Gpd2	sp|Q64521|GPDM_MOUSE Glycerol-3-phosphate dehydrogenase, mitochondrial OS=Mus musculus OX=10090 GN=Gpd2 PE=1 SV=2;tr|A2AQR0|A2AQR0_MOUSE Glycerol-3-phosphate dehydrogenase OS=Mus musculus OX=10090 GN=Gpd2 PE=1 SV=1	2	25	25	25	20	19	20	22	23	22	20	19	20	22	23	22	20	19	20	22	23	22	47.2	47.2	47.2	80.953	727	727;745	3.66	90	20	48	47	74	0	148.96	By MS/MS	By MS/MS	By MS/MS	By MS/MS	By MS/MS	By MS/MS
Q8BG05;A2AL12;A2AL13;V9GX38	Q8BG05;A2AL12	25;25;5;1	25;25;5;1	24;24;5;1	Heterogeneous nuclear ribonucleoprotein A3	Hnrnpa3	sp|Q8BG05|ROA3_MOUSE Heterogeneous nuclear ribonucleoprotein A3 OS=Mus musculus OX=10090 GN=Hnrnpa3 PE=1 SV=1;tr|A2AL12|A2AL12_MOUSE Heterogeneous nuclear ribonucleoprotein A3 OS=Mus musculus OX=10090 GN=Hnrnpa3 PE=1 SV=1	4	25	25	24	19	24	23	19	20	17	19	24	23	19	20	17	19	23	22	19	19	16	55.7	55.7	53.3	39.652	379	379;318;194;357	3.33	198	60	100	104	91	0	323.31	By MS/MS	By MS/MS	By MS/MS	By MS/MS	By MS/MS	By MS/MS
Q62315;G3UZT8;G3UZW3;G3UZQ8;G3UXE0;G3UYY7	Q62315;G3UZT8	25;18;5;3;2;2	25;18;5;3;2;2	25;18;5;3;2;2	Protein Jumonji	Jarid2	sp|Q62315|JARD2_MOUSE Protein Jumonji OS=Mus musculus OX=10090 GN=Jarid2 PE=1 SV=1;tr|G3UZT8|G3UZT8_MOUSE Protein Jumonji (Fragment) OS=Mus musculus OX=10090 GN=Jarid2 PE=1 SV=8	6	25	25	25	22	23	25	18	20	19	22	23	25	18	20	19	22	23	25	18	20	19	23.7	23.7	23.7	137.44	1234	1234;1029;507;80;58;82	3.91	71	23	42	34	89	0	97.154	By MS/MS	By MS/MS	By MS/MS	By MS/MS	By MS/MS	By MS/MS
P52293;A2A600;A2A601;A6PW68;F2Z431;A2A602	P52293	25;11;11;9;4;4	25;11;11;9;4;4	25;11;11;9;4;4	Importin subunit alpha-1	Kpna2	sp|P52293|IMA1_MOUSE Importin subunit alpha-1 OS=Mus musculus OX=10090 GN=Kpna2 PE=1 SV=2	6	25	25	25	19	16	20	20	23	22	19	16	20	20	23	22	19	16	20	20	23	22	55.4	55.4	55.4	57.927	529	529;163;170;189;75;80	3.55	127	23	53	73	84	0	323.31	By MS/MS	By MS/MS	By MS/MS	By MS/MS	By MS/MS	By MS/MS
P02469;E9QN70	P02469;E9QN70	25;25	25;25	25;25	Laminin subunit beta-1	Lamb1	sp|P02469|LAMB1_MOUSE Laminin subunit beta-1 OS=Mus musculus OX=10090 GN=Lamb1 PE=1 SV=3;tr|E9QN70|E9QN70_MOUSE Laminin subunit beta-1 OS=Mus musculus OX=10090 GN=Lamb1 PE=1 SV=1	2	25	25	25	15	16	19	17	17	17	15	16	19	17	17	17	15	16	19	17	17	17	19	19	19	197.09	1786	1786;1834	3.48	28	36	30	37	6	0	96.751	By MS/MS	By MS/MS	By MS/MS	By MS/MS	By MS/MS	By MS/MS
Q9ERG0;A0A2R8VI67	Q9ERG0	25;5	25;5	25;5	LIM domain and actin-binding protein 1	Lima1	sp|Q9ERG0|LIMA1_MOUSE LIM domain and actin-binding protein 1 OS=Mus musculus OX=10090 GN=Lima1 PE=1 SV=3	2	25	25	25	21	16	23	13	13	15	21	16	23	13	13	15	21	16	23	13	13	15	37.5	37.5	37.5	84.059	753	753;109	3.43	61	26	11	42	34	0	90.756	By MS/MS	By MS/MS	By MS/MS	By MS/MS	By MS/MS	By MS/MS
F8WHY8;Q8K4B0;E9PX23	F8WHY8;Q8K4B0;E9PX23	25;23;23	23;21;21	19;17;17	Metastasis-associated protein MTA1	Mta1	tr|F8WHY8|F8WHY8_MOUSE Metastasis-associated protein MTA1 OS=Mus musculus OX=10090 GN=Mta1 PE=1 SV=1;sp|Q8K4B0|MTA1_MOUSE Metastasis-associated protein MTA1 OS=Mus musculus OX=10090 GN=Mta1 PE=1 SV=1;tr|E9PX23|E9PX23_MOUSE Metastasis-associated protein MTA	3	25	23	19	18	19	23	17	18	21	17	17	21	15	17	20	14	14	17	11	14	16	47	44.4	37.7	79.189	698	698;715;703	4.05	56	12	39	38	77	0	114.16	By MS/MS	By MS/MS	By MS/MS	By MS/MS	By MS/MS	By MS/MS
E9PWG6	E9PWG6	25	25	25		Ncapg	tr|E9PWG6|E9PWG6_MOUSE Non-SMC condensin I complex, subunit G OS=Mus musculus OX=10090 GN=Ncapg PE=1 SV=1	1	25	25	25	16	20	21	20	18	16	16	20	21	20	18	16	16	20	21	20	18	16	31	31	31	112.87	1004	1004	3.45	59	30	53	45	23	0	238.71	By MS/MS	By MS/MS	By MS/MS	By MS/MS	By MS/MS	By MS/MS
E9QN31;Q922K7;A0A0N4SW16	E9QN31;Q922K7	25;21;3	25;21;3	25;21;3	Probable 28S rRNA (cytosine-C(5))-methyltransferase	Nop2	tr|E9QN31|E9QN31_MOUSE Probable 28S rRNA (cytosine-C(5))-methyltransferase OS=Mus musculus OX=10090 GN=Nop2 PE=1 SV=1;sp|Q922K7|NOP2_MOUSE Probable 28S rRNA (cytosine-C(5))-methyltransferase OS=Mus musculus OX=10090 GN=Nop2 PE=1 SV=1	3	25	25	25	20	22	24	21	23	22	20	22	24	21	23	22	20	22	24	21	23	22	37.2	37.2	37.2	86.906	794	794;793;133	3.21	140	37	87	75	41	0	265.32	By MS/MS	By MS/MS	By MS/MS	By MS/MS	By MS/MS	By MS/MS
B2RXT3;E9Q7L0	B2RXT3;E9Q7L0	25;24	19;18	19;18		Ogdhl	tr|B2RXT3|B2RXT3_MOUSE Ogdhl protein OS=Mus musculus OX=10090 GN=Ogdhl PE=1 SV=1;tr|E9Q7L0|E9Q7L0_MOUSE Oxoglutarate dehydrogenase-like OS=Mus musculus OX=10090 GN=Ogdhl PE=1 SV=1	2	25	19	19	17	20	22	12	17	12	14	14	16	8	13	11	14	14	16	8	13	11	31.6	25.8	25.8	114.56	1010	1010;1029	4.21	14	8	43	31	22	0	81.529	By MS/MS	By MS/MS	By MS/MS	By MS/MS	By MS/MS	By MS/MS
Q60953;D3Z3A6;D3YXR5;F7BTZ2;D3Z2V0;D6RII9	Q60953;D3Z3A6;D3YXR5;F7BTZ2	25;21;21;17;6;1	25;21;21;17;6;1	25;21;21;17;6;1	Protein PML	Pml	sp|Q60953|PML_MOUSE Protein PML OS=Mus musculus OX=10090 GN=Pml PE=1 SV=3;tr|D3Z3A6|D3Z3A6_MOUSE Protein PML OS=Mus musculus OX=10090 GN=Pml PE=1 SV=1;tr|D3YXR5|D3YXR5_MOUSE Protein PML OS=Mus musculus OX=10090 GN=Pml PE=1 SV=1;tr|F7BTZ2|F7BTZ2_MOUSE Prote	6	25	25	25	19	21	21	13	16	16	19	21	21	13	16	16	19	21	21	13	16	16	41.2	41.2	41.2	98.241	885	885;632;641;578;118;53	3.29	70	30	29	30	36	0	179.35	By MS/MS	By MS/MS	By MS/MS	By MS/MS	By MS/MS	By MS/MS
Q61074;A0A0J9YVG0;A0A0J9YV96;A0A0J9YUB0	Q61074;A0A0J9YVG0	25;20;8;6	25;20;8;6	25;20;8;6	Protein phosphatase 1G	Ppm1g	sp|Q61074|PPM1G_MOUSE Protein phosphatase 1G OS=Mus musculus OX=10090 GN=Ppm1g PE=1 SV=3;tr|A0A0J9YVG0|A0A0J9YVG0_MOUSE Protein phosphatase 1G OS=Mus musculus OX=10090 GN=Ppm1g PE=1 SV=1	4	25	25	25	22	22	23	20	25	22	22	22	23	20	25	22	22	22	23	20	25	22	57.7	57.7	57.7	58.727	542	542;435;194;230	3.27	119	67	73	53	52	0	319.91	By MS/MS	By MS/MS	By MS/MS	By MS/MS	By MS/MS	By MS/MS
Q7TSC1;G3UX48	Q7TSC1;G3UX48	25;23	25;23	25;23	Protein PRRC2A	Prrc2a	sp|Q7TSC1|PRC2A_MOUSE Protein PRRC2A OS=Mus musculus OX=10090 GN=Prrc2a PE=1 SV=1;tr|G3UX48|G3UX48_MOUSE Protein PRRC2A OS=Mus musculus OX=10090 GN=Prrc2a PE=1 SV=1	2	25	25	25	19	16	18	17	23	21	19	16	18	17	23	21	19	16	18	17	23	21	19.1	19.1	19.1	229.2	2158	2158;2069	3.64	49	50	11	52	37	0	110.97	By MS/MS	By MS/MS	By MS/MS	By MS/MS	By MS/MS	By MS/MS
Q8VDM4;A0A338P6M5;E9Q2S8;A0A338P6S9;A0A338P7H4	Q8VDM4	25;7;1;1;1	25;7;1;1;1	25;7;1;1;1	26S proteasome non-ATPase regulatory subunit 2	Psmd2	sp|Q8VDM4|PSMD2_MOUSE 26S proteasome non-ATPase regulatory subunit 2 OS=Mus musculus OX=10090 GN=Psmd2 PE=1 SV=1	5	25	25	25	20	23	20	21	21	19	20	23	20	21	21	19	20	23	20	21	21	19	31.3	31.3	31.3	100.2	908	908;142;60;97;139	2.84	131	44	28	33	41	0	188.6	By MS/MS	By MS/MS	By MS/MS	By MS/MS	By MS/MS	By MS/MS
Q8BGJ5;Q922I7;P17225;Q8CB58;E9QMW9;E9Q0W3;F7DCW4;F7AXP1;E9Q279;E9PZ39	Q8BGJ5;Q922I7;P17225;Q8CB58;E9QMW9	25;25;20;20;15;4;4;4;2;1	25;25;20;20;15;4;4;4;2;1	23;23;18;18;13;4;3;3;2;1	Polypyrimidine tract-binding protein 1	Ptbp1	tr|Q8BGJ5|Q8BGJ5_MOUSE Polypyrimidine tract-binding protein 1 OS=Mus musculus OX=10090 GN=Ptbp1 PE=1 SV=1;tr|Q922I7|Q922I7_MOUSE Polypyrimidine tract-binding protein 1 OS=Mus musculus OX=10090 GN=Ptbp1 PE=1 SV=1;sp|P17225|PTBP1_MOUSE Polypyrimidine tract-b	10	25	25	23	18	22	25	20	21	20	18	22	25	20	21	20	17	20	23	18	19	18	72.6	72.6	69.8	56.891	529	529;555;527;489;353;55;107;162;62;113	3.63	152	57	36	87	127	0	323.31	By MS/MS	By MS/MS	By MS/MS	By MS/MS	By MS/MS	By MS/MS
Q3UEB3	Q3UEB3	25	25	25	Poly(U)-binding-splicing factor PUF60	Puf60	sp|Q3UEB3|PUF60_MOUSE Poly(U)-binding-splicing factor PUF60 OS=Mus musculus OX=10090 GN=Puf60 PE=1 SV=2	1	25	25	25	22	21	22	20	22	22	22	21	22	20	22	22	22	21	22	20	22	22	54.6	54.6	54.6	60.248	564	564	3.62	111	38	121	86	63	0	267.1	By MS/MS	By MS/MS	By MS/MS	By MS/MS	By MS/MS	By MS/MS
Q8R3C6;A0A0J9YUT8	Q8R3C6;A0A0J9YUT8	25;24	25;24	25;24	Probable RNA-binding protein 19	Rbm19	sp|Q8R3C6|RBM19_MOUSE Probable RNA-binding protein 19 OS=Mus musculus OX=10090 GN=Rbm19 PE=1 SV=1;tr|A0A0J9YUT8|A0A0J9YUT8_MOUSE Probable RNA-binding protein 19 OS=Mus musculus OX=10090 GN=Rbm19 PE=1 SV=1	2	25	25	25	20	22	20	21	21	20	20	22	20	21	21	20	20	22	20	21	21	20	30.8	30.8	30.8	106.08	952	952;870	3.43	87	25	16	23	69	0	94.235	By MS/MS	By MS/MS	By MS/MS	By MS/MS	By MS/MS	By MS/MS
E9PYZ7	E9PYZ7	25	1	1		Rbm26	tr|E9PYZ7|E9PYZ7_MOUSE RNA-binding protein 26 OS=Mus musculus OX=10090 GN=Rbm26 PE=1 SV=1	1	25	1	1	20	20	22	19	21	22	1	1	1	1	1	1	1	1	1	1	1	1	25	1.2	1.2	113.8	1009	1009	5				6		0.0038004	2.4105	By MS/MS	By matching	By MS/MS	By MS/MS	By MS/MS	By matching
Q6NZN0;E9Q640	Q6NZN0;E9Q640	25;25	25;25	0;0	RNA-binding protein 26	Rbm26	sp|Q6NZN0|RBM26_MOUSE RNA-binding protein 26 OS=Mus musculus OX=10090 GN=Rbm26 PE=1 SV=2;tr|E9Q640|E9Q640_MOUSE RNA-binding protein 26 OS=Mus musculus OX=10090 GN=Rbm26 PE=1 SV=1	2	25	25	0	20	20	22	19	21	22	20	20	22	19	21	22	0	0	0	0	0	0	25.2	25.2	0	114.14	1012	1012;1001	3.34	71	38	69	48	20	0	115.11	By MS/MS	By MS/MS	By MS/MS	By MS/MS	By MS/MS	By MS/MS
Q8BK67;A2AWQ2	Q8BK67	25;6	25;6	25;6	Protein RCC2	Rcc2	sp|Q8BK67|RCC2_MOUSE Protein RCC2 OS=Mus musculus OX=10090 GN=Rcc2 PE=1 SV=1	2	25	25	25	21	25	23	23	23	21	21	25	23	23	23	21	21	25	23	23	23	21	60	60	60	55.983	520	520;170	3.56	203	44	120	128	127	0	323.31	By MS/MS	By MS/MS	By MS/MS	By MS/MS	By MS/MS	By MS/MS
Q99LF4	Q99LF4	25	25	25	tRNA-splicing ligase RtcB homolog	Rtcb	sp|Q99LF4|RTCB_MOUSE RNA-splicing ligase RtcB homolog OS=Mus musculus OX=10090 GN=Rtcb PE=1 SV=1	1	25	25	25	23	23	24	22	22	23	23	23	24	22	22	23	23	23	24	22	22	23	51.9	51.9	51.9	55.249	505	505	3.42	160	36	67	47	112	0	238.13	By MS/MS	By MS/MS	By MS/MS	By MS/MS	By MS/MS	By MS/MS
Q9QXX4	Q9QXX4	25	25	22	Calcium-binding mitochondrial carrier protein Aralar2	Slc25a13	sp|Q9QXX4|CMC2_MOUSE Calcium-binding mitochondrial carrier protein Aralar2 OS=Mus musculus OX=10090 GN=Slc25a13 PE=1 SV=1	1	25	25	22	21	23	22	20	19	22	21	23	22	20	19	22	19	21	20	18	17	19	41.4	41.4	38.6	74.466	676	676	4.29	48	9	32	59	80	0	143.85	By MS/MS	By MS/MS	By MS/MS	By MS/MS	By MS/MS	By MS/MS
A0A0B4J1E2;Q9CSN1	A0A0B4J1E2;Q9CSN1	25;23	25;23	25;23	SNW domain-containing protein 1	Snw1	tr|A0A0B4J1E2|A0A0B4J1E2_MOUSE SNW domain-containing protein 1 OS=Mus musculus OX=10090 GN=Snw1 PE=1 SV=1;sp|Q9CSN1|SNW1_MOUSE SNW domain-containing protein 1 OS=Mus musculus OX=10090 GN=Snw1 PE=1 SV=3	2	25	25	25	23	20	23	20	22	23	23	20	23	20	22	23	23	20	23	20	22	23	53.9	53.9	53.9	61.461	536	536;536	3.27	93	62	37	56	38	0	164.11	By MS/MS	By MS/MS	By MS/MS	By MS/MS	By MS/MS	By MS/MS
P05214	P05214	25	4	2	Tubulin alpha-3 chain	Tuba3a	sp|P05214|TBA3_MOUSE Tubulin alpha-3 chain OS=Mus musculus OX=10090 GN=Tuba3a PE=1 SV=1	1	25	4	2	17	20	21	20	22	19	2	2	3	3	3	4	2	2	2	2	1	2	62.2	8.7	5.3	49.959	450	450	3.32	9		11		5	0	10.714	By MS/MS	By MS/MS	By MS/MS	By MS/MS	By MS/MS	By MS/MS
Q9ERD7;A0A1D5RM76	Q9ERD7	25;3	12;2	9;2	Tubulin beta-3 chain	Tubb3	sp|Q9ERD7|TBB3_MOUSE Tubulin beta-3 chain OS=Mus musculus OX=10090 GN=Tubb3 PE=1 SV=1	2	25	12	9	21	24	23	24	23	21	9	11	11	12	11	10	6	8	8	9	8	7	69.6	48.7	42.9	50.418	450	450;122	3.38	81	12		36	53	0	160.49	By MS/MS	By MS/MS	By MS/MS	By MS/MS	By MS/MS	By MS/MS
Q8BFR5;A0A0U1RNQ6;A0A0U1RPC4	Q8BFR5	25;8;6	25;8;6	25;8;6	Elongation factor Tu, mitochondrial	Tufm	sp|Q8BFR5|EFTU_MOUSE Elongation factor Tu, mitochondrial OS=Mus musculus OX=10090 GN=Tufm PE=1 SV=1	3	25	25	25	20	20	21	20	23	22	20	20	21	20	23	22	20	20	21	20	23	22	59.3	59.3	59.3	49.508	452	452;118;116	3.45	112	38	65	46	72	0	191.29	By MS/MS	By MS/MS	By MS/MS	By MS/MS	By MS/MS	By MS/MS
Q6ZPJ3;REV__F7B6X4;REV__F6V8M6;REV__F6U2C2;REV__O70305;REV__E9QM77	Q6ZPJ3	25;1;1;1;1;1	25;1;1;1;1;1	25;1;1;1;1;1	E2/E3 hybrid ubiquitin-protein ligase UBE2O	Ube2o	sp|Q6ZPJ3|UBE2O_MOUSE (E3-independent) E2 ubiquitin-conjugating enzyme UBE2O OS=Mus musculus OX=10090 GN=Ube2o PE=1 SV=3	6	25	25	25	15	14	17	20	21	20	15	14	17	20	21	20	15	14	17	20	21	20	27.6	27.6	27.6	140.83	1288	1288;330;662;929;1285;1286	3.77	37	38	28	31	39	0	150.07	By MS/MS	By MS/MS	By MS/MS	By MS/MS	By MS/MS	By MS/MS
Q5I043;A0A1L1SUC4;A0A1L1SSQ8	Q5I043;A0A1L1SUC4	25;15;1	25;15;1	25;15;1	Ubiquitin carboxyl-terminal hydrolase 28	Usp28	sp|Q5I043|UBP28_MOUSE Ubiquitin carboxyl-terminal hydrolase 28 OS=Mus musculus OX=10090 GN=Usp28 PE=1 SV=1;tr|A0A1L1SUC4|A0A1L1SUC4_MOUSE Ubiquitin carboxyl-terminal hydrolase 28 (Fragment) OS=Mus musculus OX=10090 GN=Usp28 PE=1 SV=1	3	25	25	25	18	18	22	12	10	10	18	18	22	12	10	10	18	18	22	12	10	10	35.7	35.7	35.7	119.32	1051	1051;698;127	3.83	24	23	49	36	17	0	190.87	By MS/MS	By MS/MS	By MS/MS	By MS/MS	By MS/MS	By MS/MS
O88466;R4GML0;E9Q7S1;F6UL00;E9PVH6;F6QFS1;F6SID8	O88466;R4GML0;E9Q7S1	25;23;22;5;2;2;1	25;23;22;5;2;2;1	25;23;22;5;2;2;1	Zinc finger protein 106	Znf106;Zfp106	sp|O88466|ZN106_MOUSE Zinc finger protein 106 OS=Mus musculus OX=10090 GN=Znf106 PE=1 SV=3;tr|R4GML0|R4GML0_MOUSE Zinc finger protein 106 OS=Mus musculus OX=10090 GN=Zfp106 PE=1 SV=1;tr|E9Q7S1|E9Q7S1_MOUSE Zinc finger protein 106 OS=Mus musculus OX=10090 G	7	25	25	25	8	7	15	18	20	18	8	7	15	18	20	18	8	7	15	18	20	18	21.3	21.3	21.3	208.96	1888	1888;1888;1865;264;151;163;168	3.63	15	33	33	14	12	0	100.45	By MS/MS	By MS/MS	By MS/MS	By MS/MS	By MS/MS	By MS/MS
Q8C1B7;A0A0J9YTY0;A0A0J9YUL3;A0A0J9YUV6;A0A0J9YVA6;Q8CHH9;B1AQZ0;B7ZC46;B1AQY9;A2A3W1	Q8C1B7;A0A0J9YTY0;A0A0J9YUL3	24;24;24;8;8;3;3;3;3;1	24;24;24;8;8;3;3;3;3;1	16;16;16;7;7;0;0;0;0;0	Septin-11	11-Sep	sp|Q8C1B7|SEP11_MOUSE Septin-11 OS=Mus musculus OX=10090 GN=Septin11 PE=1 SV=4;tr|A0A0J9YTY0|A0A0J9YTY0_MOUSE Septin-11 OS=Mus musculus OX=10090 GN=Septin11 PE=1 SV=1;tr|A0A0J9YUL3|A0A0J9YUL3_MOUSE Septin-11 OS=Mus musculus OX=10090 GN=Septin11 PE=1 SV=1	10	24	24	16	18	20	23	22	21	20	18	20	23	22	21	20	11	14	15	15	13	12	51	51	36.9	49.694	431	431;425;432;97;204;429;484;440;442;141	3.27	118	31	73	43	54	0	306.88	By MS/MS	By MS/MS	By MS/MS	By MS/MS	By MS/MS	By MS/MS
Q9JIX8;F6RJ39;B8JJ91;B8JJ89;B8JJ90;F6Q8C0	Q9JIX8;F6RJ39;B8JJ91	24;23;13;3;2;1	24;23;13;3;2;1	11;11;0;3;0;0	Apoptotic chromatin condensation inducer in the nucleus	Acin1	sp|Q9JIX8|ACINU_MOUSE Apoptotic chromatin condensation inducer in the nucleus OS=Mus musculus OX=10090 GN=Acin1 PE=1 SV=3;tr|F6RJ39|F6RJ39_MOUSE Apoptotic chromatin condensation inducer in the nucleus (Fragment) OS=Mus musculus OX=10090 GN=Acin1 PE=1 SV=1;	6	24	24	11	19	19	22	17	19	17	19	19	22	17	19	17	10	10	10	8	8	7	22.3	22.3	10.6	150.72	1338	1338;1272;634;256;221;141	3.67	70	32	26	56	54	0	122.38	By MS/MS	By MS/MS	By MS/MS	By MS/MS	By MS/MS	By MS/MS
Q8CJG0	Q8CJG0	24	24	18	Protein argonaute-2	Ago2	sp|Q8CJG0|AGO2_MOUSE Protein argonaute-2 OS=Mus musculus OX=10090 GN=Ago2 PE=1 SV=3	1	24	24	18	17	15	19	10	9	14	17	15	19	10	9	14	14	9	15	6	6	10	32.6	32.6	25.3	97.303	860	860	3.66	30	16	31	21	22	0	70.647	By MS/MS	By MS/MS	By MS/MS	By MS/MS	By MS/MS	By MS/MS
P97452	P97452	24	24	24	Ribosome biogenesis protein BOP1	Bop1	sp|P97452|BOP1_MOUSE Ribosome biogenesis protein BOP1 OS=Mus musculus OX=10090 GN=Bop1 PE=1 SV=1	1	24	24	24	20	18	23	20	19	20	20	18	23	20	19	20	20	18	23	20	19	20	45.8	45.8	45.8	82.545	732	732	3.79	90	3	31	91	62	0	161.71	By MS/MS	By MS/MS	By MS/MS	By MS/MS	By MS/MS	By MS/MS
P35564	P35564	24	24	24	Calnexin	Canx	sp|P35564|CALX_MOUSE Calnexin OS=Mus musculus OX=10090 GN=Canx PE=1 SV=1	1	24	24	24	21	22	24	21	20	21	21	22	24	21	20	21	21	22	24	21	20	21	38.4	38.4	38.4	67.277	591	591	3.42	155	38	92	90	75	0	200.23	By MS/MS	By MS/MS	By MS/MS	By MS/MS	By MS/MS	By MS/MS
Q14B71;D3YZE8;D3Z5P7;F6RTJ7	Q14B71;D3YZE8	24;15;11;1	24;15;11;1	21;14;11;0	Cell division cycle-associated protein 2	Cdca2	sp|Q14B71|CDCA2_MOUSE Cell division cycle-associated protein 2 OS=Mus musculus OX=10090 GN=Cdca2 PE=1 SV=2;tr|D3YZE8|D3YZE8_MOUSE Cell division cycle-associated protein 2 (Fragment) OS=Mus musculus OX=10090 GN=Cdca2 PE=1 SV=1	4	24	24	21	17	12	18	13	21	17	17	12	18	13	21	17	15	11	15	11	18	15	42.7	42.7	35.6	106.36	982	982;549;310;87	2.96	42	37	34	18	3	0	163.95	By MS/MS	By MS/MS	By MS/MS	By MS/MS	By MS/MS	By MS/MS
Q04447;P07310;A0A0J9YKD4	Q04447	24;2;2	24;2;2	24;2;2	Creatine kinase B-type	Ckb	sp|Q04447|KCRB_MOUSE Creatine kinase B-type OS=Mus musculus OX=10090 GN=Ckb PE=1 SV=1	3	24	24	24	16	14	18	21	20	20	16	14	18	21	20	20	16	14	18	21	20	20	75.3	75.3	75.3	42.713	381	381;381;312	3.62	123	76	36	48	121	0	323.31	By MS/MS	By MS/MS	By MS/MS	By MS/MS	By MS/MS	By MS/MS
Q8BRT1;E9Q8N5;Q08EB6;Q08EB5;F7DCH5	Q8BRT1;E9Q8N5;Q08EB6;Q08EB5;F7DCH5	24;24;24;24;24	24;24;24;24;24	14;14;14;14;14	CLIP-associating protein 2	Clasp2	sp|Q8BRT1|CLAP2_MOUSE CLIP-associating protein 2 OS=Mus musculus OX=10090 GN=Clasp2 PE=1 SV=1;tr|E9Q8N5|E9Q8N5_MOUSE CLIP-associating protein 2 OS=Mus musculus OX=10090 GN=Clasp2 PE=1 SV=1;tr|Q08EB6|Q08EB6_MOUSE CLIP-associating protein 2 OS=Mus musculus O	5	24	24	14	18	13	19	14	17	13	18	13	19	14	17	13	9	8	10	7	9	6	24.9	24.9	13.6	140.74	1286	1286;1286;1287;1304;1307	3.97	25	22	29	42	25	0	88.022	By MS/MS	By MS/MS	By MS/MS	By MS/MS	By MS/MS	By MS/MS
Q80T06;A0A0R4J1E2;P57776;E9QN08;D3YUQ9	Q80T06;A0A0R4J1E2;P57776;E9QN08;D3YUQ9	24;23;20;17;12	24;23;20;17;12	2;2;2;2;2	Elongation factor 1-delta	Eef1d	tr|Q80T06|Q80T06_MOUSE Elongation factor 1-delta OS=Mus musculus OX=10090 GN=Eef1d PE=1 SV=1;tr|A0A0R4J1E2|A0A0R4J1E2_MOUSE Elongation factor 1-delta OS=Mus musculus OX=10090 GN=Eef1d PE=1 SV=1;sp|P57776|EF1D_MOUSE Elongation factor 1-delta OS=Mus musculus	5	24	24	2	21	21	20	21	22	20	21	21	20	21	22	20	1	1	1	2	1	1	70.8	70.8	12.8	31.292	281	281;660;281;245;193	3.55	151	49	64	149	68	0	323.31	By MS/MS	By MS/MS	By MS/MS	By MS/MS	By MS/MS	By MS/MS
Q99L45;E0CXJ3	Q99L45	24;7	24;7	24;7	Eukaryotic translation initiation factor 2 subunit 2	Eif2s2	sp|Q99L45|IF2B_MOUSE Eukaryotic translation initiation factor 2 subunit 2 OS=Mus musculus OX=10090 GN=Eif2s2 PE=1 SV=1	2	24	24	24	17	20	21	22	23	20	17	20	21	22	23	20	17	20	21	22	23	20	60.4	60.4	60.4	38.092	331	331;118	3.04	131	86	77	61	26	0	323.31	By MS/MS	By MS/MS	By MS/MS	By MS/MS	By MS/MS	By MS/MS
Q9Z0N2	Q9Z0N2	24	7	7	Eukaryotic translation initiation factor 2 subunit 3, Y-linked	Eif2s3y	sp|Q9Z0N2|IF2H_MOUSE Eukaryotic translation initiation factor 2 subunit 3, Y-linked OS=Mus musculus OX=10090 GN=Eif2s3y PE=1 SV=2	1	24	7	7	19	24	23	22	23	20	6	7	6	6	7	6	6	7	6	6	7	6	53.6	16.7	16.7	51.13	472	472	2.61	27	10	18	6		0	86.456	By MS/MS	By MS/MS	By MS/MS	By MS/MS	By MS/MS	By MS/MS
Q9WUA2;A0A087WPV4;A0A087WS80;A0A087WQ15	Q9WUA2	24;11;6;1	24;11;6;1	24;11;6;1	Phenylalanine--tRNA ligase beta subunit	Farsb	sp|Q9WUA2|SYFB_MOUSE Phenylalanine--tRNA ligase beta subunit OS=Mus musculus OX=10090 GN=Farsb PE=1 SV=2	4	24	24	24	20	22	19	22	23	21	20	22	19	22	23	21	20	22	19	22	23	21	51.1	51.1	51.1	65.696	589	589;237;206;63	3.44	113	13	49	58	64	0	166	By MS/MS	By MS/MS	By MS/MS	By MS/MS	By MS/MS	By MS/MS
P97379;A0A0J9YTQ8;A0A0J9YUY8	P97379	24;9;7	24;9;7	22;7;5	Ras GTPase-activating protein-binding protein 2	G3bp2	sp|P97379|G3BP2_MOUSE Ras GTPase-activating protein-binding protein 2 OS=Mus musculus OX=10090 GN=G3bp2 PE=1 SV=2	3	24	24	22	20	21	22	23	24	20	20	21	22	23	24	20	18	19	20	21	22	18	52.5	52.5	52.5	54.087	482	482;133;117	3.57	133	21	27	59	106	0	180.23	By MS/MS	By MS/MS	By MS/MS	By MS/MS	By MS/MS	By MS/MS
Q9CZD3	Q9CZD3	24	24	24	Glycine--tRNA ligase	Gars	sp|Q9CZD3|GARS_MOUSE Glycine--tRNA ligase OS=Mus musculus OX=10090 GN=Gars1 PE=1 SV=1	1	24	24	24	17	14	17	17	19	22	17	14	17	17	19	22	17	14	17	17	19	22	41.8	41.8	41.8	81.877	729	729	3.85	79	13	45	72	68	0	162.38	By MS/MS	By MS/MS	By MS/MS	By MS/MS	By MS/MS	By MS/MS
E9PZF0;Q5NC79	E9PZF0	24;8	24;8	0;0	Nucleoside diphosphate kinase	Gm20390	tr|E9PZF0|E9PZF0_MOUSE Nucleoside diphosphate kinase OS=Mus musculus OX=10090 GN=Gm20390 PE=3 SV=1	2	24	24	0	18	24	22	23	22	21	18	24	22	23	22	21	0	0	0	0	0	0	90.6	90.6	0	30.2	267	267;117	3.7	273	17	58	98	262	0	264.18	By MS/MS	By MS/MS	By MS/MS	By MS/MS	By MS/MS	By MS/MS
P68040	P68040	24	24	24	Guanine nucleotide-binding protein subunit beta-2-like 1;Guanine nucleotide-binding protein subunit beta-2-like 1, N-terminally processed	Gnb2l1	sp|P68040|RACK1_MOUSE Receptor of activated protein C kinase 1 OS=Mus musculus OX=10090 GN=Rack1 PE=1 SV=3	1	24	24	24	20	22	23	22	24	23	20	22	23	22	24	23	20	22	23	22	24	23	84.9	84.9	84.9	35.076	317	317	3.41	177	97	70	110	96	0	323.31	By MS/MS	By MS/MS	By MS/MS	By MS/MS	By MS/MS	By MS/MS
P55937;E9QP99;A0A0R4J1H6	P55937;E9QP99;A0A0R4J1H6	24;24;23	24;24;23	24;24;23	Golgin subfamily A member 3	Golga3	sp|P55937|GOGA3_MOUSE Golgin subfamily A member 3 OS=Mus musculus OX=10090 GN=Golga3 PE=1 SV=3;tr|E9QP99|E9QP99_MOUSE Golgin subfamily A member 3 OS=Mus musculus OX=10090 GN=Golga3 PE=1 SV=1;tr|A0A0R4J1H6|A0A0R4J1H6_MOUSE Golgin subfamily A member 3 OS=Mus	3	24	24	24	13	13	15	11	12	13	13	13	15	11	12	13	13	13	15	11	12	13	22.3	22.3	22.3	167.22	1487	1487;1487;1447	4.38	4	23	24	14	28	0	99.397	By MS/MS	By MS/MS	By MS/MS	By MS/MS	By MS/MS	By MS/MS
P05202	P05202	24	24	24	Aspartate aminotransferase, mitochondrial	Got2	sp|P05202|AATM_MOUSE Aspartate aminotransferase, mitochondrial OS=Mus musculus OX=10090 GN=Got2 PE=1 SV=1	1	24	24	24	17	19	22	20	18	20	17	19	22	20	18	20	17	19	22	20	18	20	62.3	62.3	62.3	47.411	430	430	3.42	92	14	37	44	53	0	181.05	By MS/MS	By MS/MS	By MS/MS	By MS/MS	By MS/MS	By MS/MS
Q61035;A0A494BAV2	Q61035	24;5	24;5	18;5	Histidine--tRNA ligase, cytoplasmic	Hars	sp|Q61035|HARS1_MOUSE Histidine--tRNA ligase, cytoplasmic OS=Mus musculus OX=10090 GN=Hars1 PE=1 SV=2	2	24	24	18	16	17	18	19	17	16	16	17	18	19	17	16	13	13	13	16	13	11	43.4	43.4	35.8	57.432	509	509;125	3.52	54	13	33	31	33	0	179.73	By MS/MS	By MS/MS	By MS/MS	By MS/MS	By MS/MS	By MS/MS
B9EKS2;Q6ZPY7;A0A286YDJ6;Q3UI14	B9EKS2;Q6ZPY7;A0A286YDJ6	24;20;18;4	23;19;18;4	23;19;18;4	Lysine-specific demethylase 3B	Kdm3b	tr|B9EKS2|B9EKS2_MOUSE Jumonji domain containing 1B OS=Mus musculus OX=10090 GN=Kdm3b PE=1 SV=1;sp|Q6ZPY7|KDM3B_MOUSE Lysine-specific demethylase 3B OS=Mus musculus OX=10090 GN=Kdm3b PE=1 SV=2;tr|A0A286YDJ6|A0A286YDJ6_MOUSE Lysine-specific demethylase 3B O	4	24	23	23	18	13	16	10	12	10	17	12	15	9	11	9	17	12	15	9	11	9	22.7	22	22	191.46	1762	1762;1562;1333;481	4.41	14	10	12	29	31	0	93.622	By MS/MS	By MS/MS	By MS/MS	By MS/MS	By MS/MS	By MS/MS
E9Q4K7;A0A286YCV9;A0A286YD28	E9Q4K7;A0A286YCV9	24;24;4	24;24;4	24;24;4	Kinesin-like protein	Kif13b	tr|E9Q4K7|E9Q4K7_MOUSE Kinesin family member 13B OS=Mus musculus OX=10090 GN=Kif13b PE=1 SV=1;tr|A0A286YCV9|A0A286YCV9_MOUSE Kinesin family member 13B OS=Mus musculus OX=10090 GN=Kif13b PE=1 SV=1	3	24	24	24	15	7	15	14	16	16	15	7	15	14	16	16	15	7	15	14	16	16	18.6	18.6	18.6	204.57	1843	1843;1847;151	4.27	9	15	31	28	21	0	95.566	By MS/MS	By MS/MS	By MS/MS	By MS/MS	By MS/MS	By MS/MS
P97329;A0A494B9Q9;A0A494BBG6	P97329	24;4;4	24;4;4	24;4;4	Kinesin-like protein KIF20A	Kif20a	sp|P97329|KI20A_MOUSE Kinesin-like protein KIF20A OS=Mus musculus OX=10090 GN=Kif20a PE=1 SV=1	3	24	24	24	18	18	22	19	21	21	18	18	22	19	21	21	18	18	22	19	21	21	37.9	37.9	37.9	99.875	887	887;277;312	3.39	71	24	54	29	38	0	323.31	By MS/MS	By MS/MS	By MS/MS	By MS/MS	By MS/MS	By MS/MS
Q6ZQ58;Z4YJT3;Q9D423	Q6ZQ58;Z4YJT3	24;24;1	24;24;1	24;24;1	La-related protein 1	Larp1	sp|Q6ZQ58|LARP1_MOUSE La-related protein 1 OS=Mus musculus OX=10090 GN=Larp1 PE=1 SV=3;tr|Z4YJT3|Z4YJT3_MOUSE La-related protein 1 OS=Mus musculus OX=10090 GN=Larp1 PE=1 SV=1	3	24	24	24	17	15	18	18	21	17	17	15	18	18	21	17	17	15	18	18	21	17	33	33	33	121.12	1072	1072;1072;248	3.56	76	28	42	42	54	0	151.79	By MS/MS	By MS/MS	By MS/MS	By MS/MS	By MS/MS	By MS/MS
E9Q794;H3BIY7	E9Q794	24;4	16;4	2;0		Mta3	tr|E9Q794|E9Q794_MOUSE Metastasis-associated protein MTA3 OS=Mus musculus OX=10090 GN=Mta3 PE=1 SV=1	2	24	16	2	16	18	20	20	17	16	11	12	12	13	11	10	1	1	1	1	1	1	53.5	40.3	4.1	58.454	514	514;251	3.43	38	20	19	15	26	0	139.6	By MS/MS	By MS/MS	By MS/MS	By MS/MS	By MS/MS	By MS/MS
E9Q2B2;Q8CHB6;F7C134;E9Q9Y2;E9Q8K6;Q5RIN0;Q8BK32;E0CYX5	E9Q2B2;Q8CHB6;F7C134;E9Q9Y2	24;17;15;15;6;4;3;1	24;17;15;15;6;4;3;1	1;1;1;1;0;0;0;0		Ncor1	tr|E9Q2B2|E9Q2B2_MOUSE Nuclear receptor corepressor 1 OS=Mus musculus OX=10090 GN=Ncor1 PE=1 SV=1;tr|Q8CHB6|Q8CHB6_MOUSE MKIAA1047 protein (Fragment) OS=Mus musculus OX=10090 GN=Ncor1 PE=1 SV=1;tr|F7C134|F7C134_MOUSE Nuclear receptor corepressor 1 (Fragmen	8	24	24	1	21	10	21	11	17	12	21	10	21	11	17	12	1	1	1	1	1	1	14.8	14.8	0.5	264.04	2386	2386;1724;1389;1399;791;541;291;163	4.49	3	23	7	50	15	0	64.363	By MS/MS	By MS/MS	By MS/MS	By MS/MS	By MS/MS	By MS/MS
Q6KCD5	Q6KCD5	24	24	24	Nipped-B-like protein	Nipbl	sp|Q6KCD5|NIPBL_MOUSE Nipped-B-like protein OS=Mus musculus OX=10090 GN=Nipbl PE=1 SV=1	1	24	24	24	17	17	18	8	11	12	17	17	18	8	11	12	17	17	18	8	11	12	10.3	10.3	10.3	315.45	2798	2798	4.07	18	18	16	23	28	0	58.334	By MS/MS	By MS/MS	By MS/MS	By MS/MS	By MS/MS	By MS/MS
P58281;H7BX01;E0CXD1;F6U775	P58281;H7BX01;E0CXD1	24;23;16;7	24;23;16;7	24;23;16;7	Dynamin-like 120 kDa protein, mitochondrial;Dynamin-like 120 kDa protein, form S1	Opa1	sp|P58281|OPA1_MOUSE Dynamin-like 120 kDa protein, mitochondrial OS=Mus musculus OX=10090 GN=Opa1 PE=1 SV=1;tr|H7BX01|H7BX01_MOUSE Dynamin-like 120 kDa protein, form S1 OS=Mus musculus OX=10090 GN=Opa1 PE=1 SV=1;tr|E0CXD1|E0CXD1_MOUSE Dynamin-like 120 kDa	4	24	24	24	17	13	19	16	15	16	17	13	19	16	15	16	17	13	19	16	15	16	30.8	30.8	30.8	111.34	960	960;978;692;296	4.14	22	21	15	43	31	0	83.985	By MS/MS	By MS/MS	By MS/MS	By MS/MS	By MS/MS	By MS/MS
A0A2R8VHP9;Q3TT81;A0A2R8VKF0;A0A2R8VHN3;A0A2R8VHI3	A0A2R8VHP9;Q3TT81;A0A2R8VKF0;A0A2R8VHN3	24;21;17;14;5	24;21;17;14;5	0;0;0;0;0		Pcbp2	tr|A0A2R8VHP9|A0A2R8VHP9_MOUSE Poly(rC)-binding protein 2 OS=Mus musculus OX=10090 GN=Pcbp2 PE=1 SV=1;tr|Q3TT81|Q3TT81_MOUSE Poly(rC)-binding protein 2 OS=Mus musculus OX=10090 GN=Pcbp2 PE=1 SV=1;tr|A0A2R8VKF0|A0A2R8VKF0_MOUSE Poly(rC)-binding protein 2 (F	5	24	24	0	21	20	22	20	20	19	21	20	22	20	20	19	0	0	0	0	0	0	83.6	83.6	0	35.346	335	335;322;190;168;96	3.52	167	55	114	128	82	0	323.31	By MS/MS	By MS/MS	By MS/MS	By MS/MS	By MS/MS	By MS/MS
Q8K1R3	Q8K1R3	24	24	24	Polyribonucleotide nucleotidyltransferase 1, mitochondrial	Pnpt1	sp|Q8K1R3|PNPT1_MOUSE Polyribonucleotide nucleotidyltransferase 1, mitochondrial OS=Mus musculus OX=10090 GN=Pnpt1 PE=1 SV=1	1	24	24	24	14	17	18	13	17	20	14	17	18	13	17	20	14	17	18	13	17	20	36.5	36.5	36.5	85.682	783	783	4.12	44		32	38	57	0	105.99	By MS/MS	By MS/MS	By MS/MS	By MS/MS	By MS/MS	By MS/MS
Q7TNP2;Q3TTF6;H3BKU1;G3UWS4;H3BLQ0;H3BLE7;H3BIV7	Q7TNP2;Q3TTF6;H3BKU1;G3UWS4;H3BLQ0;H3BLE7;H3BIV7	24;24;24;24;23;22;18	19;19;19;19;18;19;14	19;19;19;19;18;19;14	Serine/threonine-protein phosphatase 2A 65 kDa regulatory subunit A beta isoform	Ppp2r1b	sp|Q7TNP2|2AAB_MOUSE Serine/threonine-protein phosphatase 2A 65 kDa regulatory subunit A beta isoform OS=Mus musculus OX=10090 GN=Ppp2r1b PE=1 SV=2;tr|Q3TTF6|Q3TTF6_MOUSE Serine/threonine-protein phosphatase 2A 65 kDa regulatory subunit A beta isoform OS=M	7	24	19	19	14	16	19	17	13	16	11	11	15	13	11	14	11	11	15	13	11	14	51.1	40.9	40.9	65.934	601	601;658;667;694;556;603;474	4.21	34	6	25	34	53	0	78.097	By MS/MS	By MS/MS	By MS/MS	By MS/MS	By MS/MS	By MS/MS
O08709;Q6GT24;D3Z0Y2;Q8BG37;A0A0A6YXQ7	O08709;Q6GT24;D3Z0Y2	24;24;21;6;2	24;24;21;6;2	24;24;21;6;2	Peroxiredoxin-6	Prdx6	sp|O08709|PRDX6_MOUSE Peroxiredoxin-6 OS=Mus musculus OX=10090 GN=Prdx6 PE=1 SV=3;tr|Q6GT24|Q6GT24_MOUSE Peroxiredoxin-6 OS=Mus musculus OX=10090 GN=Prdx6 PE=1 SV=1;tr|D3Z0Y2|D3Z0Y2_MOUSE Peroxiredoxin-6 OS=Mus musculus OX=10090 GN=Prdx6 PE=1 SV=1	5	24	24	24	20	21	21	23	23	22	20	21	21	23	23	22	20	21	21	23	23	22	84.8	84.8	84.8	24.87	224	224;224;200;224;76	3.36	151	44	61	68	84	0	279.77	By MS/MS	By MS/MS	By MS/MS	By MS/MS	By MS/MS	By MS/MS
Q6PB44;A0A0G2JEW5	Q6PB44	24;1	24;1	24;1	Tyrosine-protein phosphatase non-receptor type 23	Ptpn23	sp|Q6PB44|PTN23_MOUSE Tyrosine-protein phosphatase non-receptor type 23 OS=Mus musculus OX=10090 GN=Ptpn23 PE=1 SV=2	2	24	24	24	16	16	21	16	17	17	16	16	21	16	17	17	16	16	21	16	17	17	17.4	17.4	17.4	185.21	1692	1692;249	3.71	38	24	33	43	24	0	103.25	By MS/MS	By MS/MS	By MS/MS	By MS/MS	By MS/MS	By MS/MS
P46061;A0A2R8VHK9;A0A2R8W753	P46061	24;6;2	24;6;2	24;6;2	Ran GTPase-activating protein 1	Rangap1	sp|P46061|RAGP1_MOUSE Ran GTPase-activating protein 1 OS=Mus musculus OX=10090 GN=Rangap1 PE=1 SV=2	3	24	24	24	20	21	21	23	22	23	20	21	21	23	22	23	20	21	21	23	22	23	51.4	51.4	51.4	63.53	589	589;257;144	3.3	120	16	60	66	47	0	223.26	By MS/MS	By MS/MS	By MS/MS	By MS/MS	By MS/MS	By MS/MS
E9PUF4;A0A0R4J214	E9PUF4	24;7	1;0	1;0		Rbm26	tr|E9PUF4|E9PUF4_MOUSE RNA-binding protein 26 OS=Mus musculus OX=10090 GN=Rbm26 PE=1 SV=1	2	24	1	1	19	19	22	19	20	21	1	1	1	1	1	1	1	1	1	1	1	1	25.5	3.6	3.6	111.01	983	983;210	3.29	6		5	6		0	37.164	By MS/MS	By MS/MS	By MS/MS	By MS/MS	By MS/MS	By MS/MS
Q8VEE4;Q5SWN2	Q8VEE4;Q5SWN2	24;24	24;24	24;24	Replication protein A 70 kDa DNA-binding subunit;Replication protein A 70 kDa DNA-binding subunit, N-terminally processed	Rpa1	sp|Q8VEE4|RFA1_MOUSE Replication protein A 70 kDa DNA-binding subunit OS=Mus musculus OX=10090 GN=Rpa1 PE=1 SV=1;tr|Q5SWN2|Q5SWN2_MOUSE Replication protein A subunit OS=Mus musculus OX=10090 GN=Rpa1 PE=1 SV=2	2	24	24	24	20	21	23	22	20	19	20	21	23	22	20	19	20	21	23	22	20	19	38.4	38.4	38.4	69.036	623	623;644	3.15	105	28	64	47	31	0	215.33	By MS/MS	By MS/MS	By MS/MS	By MS/MS	By MS/MS	By MS/MS
P97351	P97351	24	24	24	40S ribosomal protein S3a	Rps3a	sp|P97351|RS3A_MOUSE 40S ribosomal protein S3a OS=Mus musculus OX=10090 GN=Rps3a PE=1 SV=3	1	24	24	24	21	24	24	24	24	24	21	24	24	24	24	24	21	24	24	24	24	24	61.7	61.7	61.7	29.885	264	264	3.59	169	51	58	99	126	0	116.89	By MS/MS	By MS/MS	By MS/MS	By MS/MS	By MS/MS	By MS/MS
Q08943;A2AW05	Q08943;A2AW05	24;24	24;24	24;24	FACT complex subunit SSRP1	Ssrp1	sp|Q08943|SSRP1_MOUSE FACT complex subunit SSRP1 OS=Mus musculus OX=10090 GN=Ssrp1 PE=1 SV=2;tr|A2AW05|A2AW05_MOUSE FACT complex subunit SSRP1 (Fragment) OS=Mus musculus OX=10090 GN=Ssrp1 PE=1 SV=1	2	24	24	24	21	20	23	23	22	18	21	20	23	23	22	18	21	20	23	23	22	18	35.9	35.9	35.9	80.859	708	708;623	4	93	8	56	85	101	0	121.8	By MS/MS	By MS/MS	By MS/MS	By MS/MS	By MS/MS	By MS/MS
Q9CZW5	Q9CZW5	24	24	24	Mitochondrial import receptor subunit TOM70	Tomm70a	sp|Q9CZW5|TOM70_MOUSE Mitochondrial import receptor subunit TOM70 OS=Mus musculus OX=10090 GN=Tomm70 PE=1 SV=2	1	24	24	24	21	22	20	21	22	20	21	22	20	21	22	20	21	22	20	21	22	20	50.4	50.4	50.4	67.589	611	611	3.72	86	21	58	56	71	0	257.16	By MS/MS	By MS/MS	By MS/MS	By MS/MS	By MS/MS	By MS/MS
P68368;A0A0A0MQA5;A0A087WQS4;A0A087WRB4;Q3UX10;A0A087WSB0;A0A087WSL5;A0A087WS35	P68368;A0A0A0MQA5	24;24;7;6;4;4;4;1	5;5;4;3;0;3;3;1	5;5;4;3;0;3;3;1	Tubulin alpha-4A chain	Tuba4a	sp|P68368|TBA4A_MOUSE Tubulin alpha-4A chain OS=Mus musculus OX=10090 GN=Tuba4a PE=1 SV=1;tr|A0A0A0MQA5|A0A0A0MQA5_MOUSE Tubulin alpha chain (Fragment) OS=Mus musculus OX=10090 GN=Tuba4a PE=1 SV=1	8	24	5	5	19	20	20	21	22	17	4	3	4	4	5	3	4	3	4	4	5	3	56.7	15.8	15.8	49.924	448	448;477;125;100;446;81;89;75	2.53	19	7	16	1		0	58.857	By MS/MS	By MS/MS	By MS/MS	By MS/MS	By MS/MS	By MS/MS
Q9JMH6;A0A1W2P6U1;Q9JLT4;Q9D8I4;A0A0U1RPS1;A0A0U1RPC6;A0A0M3HEP9;D3Z0K8;J3QMN4;A0A0U1RPV8;A0A0U1RQA4;J3QMQ8;A0A0M3HEQ0	Q9JMH6	24;5;1;1;1;1;1;1;1;1;1;1;1	24;5;1;1;1;1;1;1;1;1;1;1;1	24;5;1;1;1;1;1;1;1;1;1;1;1	Thioredoxin reductase 1, cytoplasmic	Txnrd1	sp|Q9JMH6|TRXR1_MOUSE Thioredoxin reductase 1, cytoplasmic OS=Mus musculus OX=10090 GN=Txnrd1 PE=1 SV=3	13	24	24	24	21	21	24	21	19	20	21	21	24	21	19	20	21	21	24	21	19	20	52.9	52.9	52.9	67.083	613	613;164;524;101;123;165;359;466;491;496;505;522;527	3.28	115	16	40	32	67	0	323.31	By MS/MS	By MS/MS	By MS/MS	By MS/MS	By MS/MS	By MS/MS
A0A0R4J0M9;Q8CDG3	A0A0R4J0M9;Q8CDG3	24;23	24;23	24;23	Deubiquitinating protein VCIP135	Vcpip1	tr|A0A0R4J0M9|A0A0R4J0M9_MOUSE Ubiquitinyl hydrolase 1 OS=Mus musculus OX=10090 GN=Vcpip1 PE=1 SV=1;sp|Q8CDG3|VCIP1_MOUSE Deubiquitinating protein VCIP135 OS=Mus musculus OX=10090 GN=Vcpip1 PE=1 SV=1	2	24	24	24	14	11	17	13	15	15	14	11	17	13	15	15	14	11	17	13	15	15	26.3	26.3	26.3	134.44	1220	1220;1220	4.18	17	16	19	24	31	0	51.044	By MS/MS	By MS/MS	By MS/MS	By MS/MS	By MS/MS	By MS/MS
P62259;D6REF3;F6WA09	P62259;D6REF3;F6WA09	24;14;12	24;14;12	22;13;11	14-3-3 protein epsilon	Ywhae	sp|P62259|1433E_MOUSE 14-3-3 protein epsilon OS=Mus musculus OX=10090 GN=Ywhae PE=1 SV=1;tr|D6REF3|D6REF3_MOUSE 14-3-3 protein epsilon OS=Mus musculus OX=10090 GN=Ywhae PE=1 SV=1;tr|F6WA09|F6WA09_MOUSE 14-3-3 protein epsilon (Fragment) OS=Mus musculus OX=1	3	24	24	22	20	22	22	19	21	21	20	22	22	19	21	21	18	20	20	17	19	19	81.2	81.2	77.3	29.174	255	255;130;154	3.69	228	154	263	274	123	0	323.31	By MS/MS	By MS/MS	By MS/MS	By MS/MS	By MS/MS	By MS/MS
A0A1W2P7S8	A0A1W2P7S8	24	1	1			tr|A0A1W2P7S8|A0A1W2P7S8_MOUSE Predicted gene, 32717 OS=Mus musculus OX=10090 GN=Gm32717 PE=3 SV=1	1	24	1	1	18	17	23	19	21	18	0	0	1	0	0	0	0	0	1	0	0	0	35.8	2.7	2.7	92.162	802	802	6					1	0	4.9246	By matching	By matching	By MS/MS	By matching	By matching	By matching
E9Q467;E9Q236	E9Q467;E9Q236	23;23	23;23	23;23		Abcc4	tr|E9Q467|E9Q467_MOUSE ATP-binding cassette, sub-family C (CFTR/MRP), member 4 OS=Mus musculus OX=10090 GN=Abcc4 PE=1 SV=1;tr|E9Q236|E9Q236_MOUSE ATP-binding cassette, sub-family C (CFTR/MRP), member 4 OS=Mus musculus OX=10090 GN=Abcc4 PE=1 SV=1	2	23	23	23	12	11	19	5	5	7	12	11	19	5	5	7	12	11	19	5	5	7	25	25	25	140.21	1250	1250;1325	3.53	15	19	19	10	10	0	75.526	By MS/MS	By MS/MS	By MS/MS	By MS/MS	By MS/MS	By MS/MS
P61222	P61222	23	23	23	ATP-binding cassette sub-family E member 1	Abce1	sp|P61222|ABCE1_MOUSE ATP-binding cassette sub-family E member 1 OS=Mus musculus OX=10090 GN=Abce1 PE=1 SV=1	1	23	23	23	18	20	20	21	19	19	18	20	20	21	19	19	18	20	20	21	19	19	41.4	41.4	41.4	67.314	599	599	3.28	107	25	54	65	37	0	220.42	By MS/MS	By MS/MS	By MS/MS	By MS/MS	By MS/MS	By MS/MS
O88990	O88990	23	13	11	Alpha-actinin-3	Actn3	sp|O88990|ACTN3_MOUSE Alpha-actinin-3 OS=Mus musculus OX=10090 GN=Actn3 PE=2 SV=1	1	23	13	11	10	9	10	15	14	20	2	1	1	6	7	13	2	1	1	5	5	11	31.1	20.9	17.9	103.04	900	900	4.47	2	5	6	9	8	0	49.09	By MS/MS	By matching	By MS/MS	By MS/MS	By MS/MS	By MS/MS
Q70FJ1	Q70FJ1	23	23	1	A-kinase anchor protein 9	Akap9	sp|Q70FJ1|AKAP9_MOUSE A-kinase anchor protein 9 OS=Mus musculus OX=10090 GN=Akap9 PE=1 SV=2	1	23	23	1	11	8	14	8	6	3	11	8	14	8	6	3	1	0	0	0	0	0	8	8	0.5	435.87	3797	3797	3.94	5	10	17	16	3	0	31.475	By MS/MS	By MS/MS	By MS/MS	By MS/MS	By MS/MS	By MS/MS
Q6P1H6	Q6P1H6	23	23	23	Ankyrin repeat and LEM domain-containing protein 2	Ankle2	sp|Q6P1H6|ANKL2_MOUSE Ankyrin repeat and LEM domain-containing protein 2 OS=Mus musculus OX=10090 GN=Ankle2 PE=1 SV=2	1	23	23	23	16	12	15	16	20	21	16	12	15	16	20	21	16	12	15	16	20	21	32.2	32.2	32.2	106.2	964	964	3.98	16	28	39	24	25	0	90.976	By MS/MS	By MS/MS	By MS/MS	By MS/MS	By MS/MS	By MS/MS
O35841	O35841	23	23	23	Apoptosis inhibitor 5	Api5	sp|O35841|API5_MOUSE Apoptosis inhibitor 5 OS=Mus musculus OX=10090 GN=Api5 PE=1 SV=2	1	23	23	23	16	22	22	19	16	15	16	22	22	19	16	15	16	22	22	19	16	15	47.2	47.2	47.2	56.784	504	504	3.45	104	37	64	48	63	0	212.57	By MS/MS	By MS/MS	By MS/MS	By MS/MS	By MS/MS	By MS/MS
Q811P8;Q80YF9;S4R2G6;A0A140LHW2	Q811P8	23;1;1;1	23;1;1;1	23;1;1;1	Rho GTPase-activating protein 32	Arhgap32	sp|Q811P8|RHG32_MOUSE Rho GTPase-activating protein 32 OS=Mus musculus OX=10090 GN=Arhgap32 PE=1 SV=2	4	23	23	23	18	11	16	4	14	10	18	11	16	4	14	10	18	11	16	4	14	10	17.2	17.2	17.2	229.72	2089	2089;1305;180;1281	4.13	7	16	23	24	12	0	82.064	By MS/MS	By MS/MS	By MS/MS	By MS/MS	By MS/MS	By MS/MS
Q925I1;H3BKI6;H3BK90;V9GWS5;V9GWS6	Q925I1	23;8;8;5;2	23;8;8;5;2	23;8;8;5;2	ATPase family AAA domain-containing protein 3	Atad3	sp|Q925I1|ATAD3_MOUSE ATPase family AAA domain-containing protein 3 OS=Mus musculus OX=10090 GN=Atad3 PE=1 SV=1	5	23	23	23	16	15	18	14	16	17	16	15	18	14	16	17	16	15	18	14	16	17	45.3	45.3	45.3	66.741	591	591;211;218;127;83	3.68	66	12	20	55	46	0	107.84	By MS/MS	By MS/MS	By MS/MS	By MS/MS	By MS/MS	By MS/MS
Q8JZM7	Q8JZM7	23	23	23	Parafibromin	Cdc73	sp|Q8JZM7|CDC73_MOUSE Parafibromin OS=Mus musculus OX=10090 GN=Cdc73 PE=1 SV=1	1	23	23	23	19	16	20	17	22	19	19	16	20	17	22	19	19	16	20	17	22	19	48.8	48.8	48.8	60.576	531	531	3.69	69	21	63	67	40	0	94.557	By MS/MS	By MS/MS	By MS/MS	By MS/MS	By MS/MS	By MS/MS
Q14AX6	Q14AX6	23	23	18	Cyclin-dependent kinase 12	Cdk12	sp|Q14AX6|CDK12_MOUSE Cyclin-dependent kinase 12 OS=Mus musculus OX=10090 GN=Cdk12 PE=1 SV=2	1	23	23	18	18	15	20	12	15	17	18	15	20	12	15	17	15	14	16	10	12	14	22.2	22.2	18.1	163.68	1484	1484	3.87	29	35	28	26	38	0	86.171	By MS/MS	By MS/MS	By MS/MS	By MS/MS	By MS/MS	By MS/MS
P18760;F8WGL3;A0A494B9A7	P18760;F8WGL3;A0A494B9A7	23;22;17	23;22;17	20;19;14	Cofilin-1	Cfl1	sp|P18760|COF1_MOUSE Cofilin-1 OS=Mus musculus OX=10090 GN=Cfl1 PE=1 SV=3;tr|F8WGL3|F8WGL3_MOUSE Cofilin, non-muscle isoform OS=Mus musculus OX=10090 GN=Cfl1 PE=1 SV=1;tr|A0A494B9A7|A0A494B9A7_MOUSE Cofilin, non-muscle isoform OS=Mus musculus OX=10090 GN=C	3	23	23	20	15	20	18	18	17	17	15	20	18	18	17	17	13	18	16	16	14	14	86.1	86.1	79.5	18.559	166	166;227;178	3.9	180	169	145	275	170	0	323.31	By MS/MS	By MS/MS	By MS/MS	By MS/MS	By MS/MS	By MS/MS
Q9D1A2;A0A494B9S3;A0A494B9U6	Q9D1A2	23;8;2	23;8;2	23;8;2	Cytosolic non-specific dipeptidase	Cndp2	sp|Q9D1A2|CNDP2_MOUSE Cytosolic non-specific dipeptidase OS=Mus musculus OX=10090 GN=Cndp2 PE=1 SV=1	3	23	23	23	19	20	18	21	23	20	19	20	18	21	23	20	19	20	18	21	23	20	57.7	57.7	57.7	52.767	475	475;122;20	3.86	104	10	66	50	112	0	197.44	By MS/MS	By MS/MS	By MS/MS	By MS/MS	By MS/MS	By MS/MS
O35218	O35218	23	23	23	Cleavage and polyadenylation specificity factor subunit 2	Cpsf2	sp|O35218|CPSF2_MOUSE Cleavage and polyadenylation specificity factor subunit 2 OS=Mus musculus OX=10090 GN=Cpsf2 PE=1 SV=1	1	23	23	23	19	13	19	12	18	15	19	13	19	12	18	15	19	13	19	12	18	15	40.4	40.4	40.4	88.382	782	782	3.51	47	16	30	13	37	0	91.716	By MS/MS	By MS/MS	By MS/MS	By MS/MS	By MS/MS	By MS/MS
Q62018	Q62018	23	23	23	RNA polymerase-associated protein CTR9 homolog	Ctr9	sp|Q62018|CTR9_MOUSE RNA polymerase-associated protein CTR9 homolog OS=Mus musculus OX=10090 GN=Ctr9 PE=1 SV=2	1	23	23	23	18	18	19	18	13	14	18	18	19	18	13	14	18	18	19	18	13	14	27.5	27.5	27.5	133.41	1173	1173	4.11	68	4	37	49	93	0	126.92	By MS/MS	By MS/MS	By MS/MS	By MS/MS	By MS/MS	By MS/MS
Q7TMB8;A0A0R4J119;A0A0U1RQ05;G3UZI5	Q7TMB8;A0A0R4J119;A0A0U1RQ05	23;20;18;2	23;20;18;2	11;10;9;1	Cytoplasmic FMR1-interacting protein 1	Cyfip1	sp|Q7TMB8|CYFP1_MOUSE Cytoplasmic FMR1-interacting protein 1 OS=Mus musculus OX=10090 GN=Cyfip1 PE=1 SV=1;tr|A0A0R4J119|A0A0R4J119_MOUSE Cytoplasmic FMR1-interacting protein OS=Mus musculus OX=10090 GN=Cyfip1 PE=1 SV=1;tr|A0A0U1RQ05|A0A0U1RQ05_MOUSE Cytopl	4	23	23	11	16	19	18	18	14	12	16	19	18	18	14	12	6	8	7	7	7	4	23.4	23.4	12.6	145.24	1253	1253;1251;969;229	4.05	41	11	6	45	48	0	76.38	By MS/MS	By MS/MS	By MS/MS	By MS/MS	By MS/MS	By MS/MS
A2A4P0;A2A4N9	A2A4P0;A2A4N9	23;21	22;20	22;20	ATP-dependent RNA helicase DHX8	Dhx8	sp|A2A4P0|DHX8_MOUSE ATP-dependent RNA helicase DHX8 OS=Mus musculus OX=10090 GN=Dhx8 PE=2 SV=1;tr|A2A4N9|A2A4N9_MOUSE RNA helicase (Fragment) OS=Mus musculus OX=10090 GN=Dhx8 PE=1 SV=8	2	23	22	22	16	13	14	19	18	16	16	12	13	18	17	16	16	12	13	18	17	16	24	23.2	23.2	142.57	1244	1244;1174	3.5	30	38	20	29	16	0	118.94	By MS/MS	By MS/MS	By MS/MS	By MS/MS	By MS/MS	By MS/MS
O88508;G3UXY2;G3UZN5;G3UZH2;G3UZF8;G3UZG8;G3UX63	O88508	23;10;6;4;4;2;1	21;10;6;2;4;2;1	12;2;1;2;1;2;1	DNA (cytosine-5)-methyltransferase 3A	Dnmt3a	sp|O88508|DNM3A_MOUSE DNA (cytosine-5)-methyltransferase 3A OS=Mus musculus OX=10090 GN=Dnmt3a PE=1 SV=2	7	23	21	12	20	20	20	17	18	19	18	18	18	15	16	17	9	9	9	8	8	8	34.8	33.1	18.3	101.67	908	908;332;184;72;140;107;94	3.91	59	27	23	51	66	0	112.8	By MS/MS	By MS/MS	By MS/MS	By MS/MS	By MS/MS	By MS/MS
Q8R1Q8	Q8R1Q8	23	23	22	Cytoplasmic dynein 1 light intermediate chain 1	Dync1li1	sp|Q8R1Q8|DC1L1_MOUSE Cytoplasmic dynein 1 light intermediate chain 1 OS=Mus musculus OX=10090 GN=Dync1li1 PE=1 SV=1	1	23	23	22	15	16	16	17	16	19	15	16	16	17	16	19	14	15	15	16	15	18	49.1	49.1	46.7	56.614	523	523	3.51	57	28	41	34	35	0	159.3	By MS/MS	By MS/MS	By MS/MS	By MS/MS	By MS/MS	By MS/MS
O70194;A0A2R8VK20	O70194	23;4	23;4	23;4	Eukaryotic translation initiation factor 3 subunit D	Eif3d	sp|O70194|EIF3D_MOUSE Eukaryotic translation initiation factor 3 subunit D OS=Mus musculus OX=10090 GN=Eif3d PE=1 SV=2	2	23	23	23	18	18	19	20	22	20	18	18	19	20	22	20	18	18	19	20	22	20	49.8	49.8	49.8	63.988	548	548;169	3.38	135	24	63	37	88	0	285.41	By MS/MS	By MS/MS	By MS/MS	By MS/MS	By MS/MS	By MS/MS
Q80Y81;B1ATP7;B1ATP9	Q80Y81;B1ATP7	23;20;5	23;20;5	23;20;5	Zinc phosphodiesterase ELAC protein 2	Elac2	sp|Q80Y81|RNZ2_MOUSE Zinc phosphodiesterase ELAC protein 2 OS=Mus musculus OX=10090 GN=Elac2 PE=1 SV=1;tr|B1ATP7|B1ATP7_MOUSE ElaC homolog protein 2 OS=Mus musculus OX=10090 GN=Elac2 PE=1 SV=1	3	23	23	23	18	18	19	16	16	17	18	18	19	16	16	17	18	18	19	16	16	17	35.4	35.4	35.4	92.718	831	831;823;207	3.72	63	14	44	43	50	0	116.38	By MS/MS	By MS/MS	By MS/MS	By MS/MS	By MS/MS	By MS/MS
Q8CHI8;Q641K9;D3Z6R8	Q8CHI8	23;1;1	23;1;1	19;1;1	E1A-binding protein p400	Ep400	sp|Q8CHI8|EP400_MOUSE E1A-binding protein p400 OS=Mus musculus OX=10090 GN=Ep400 PE=1 SV=3	3	23	23	19	18	14	20	14	15	15	18	14	20	14	15	15	16	10	17	11	13	13	12	12	9.9	337.18	3072	3072;649;686	4.04	9	51	27	22	31	0	128.07	By MS/MS	By MS/MS	By MS/MS	By MS/MS	By MS/MS	By MS/MS
Q61553;A0A0G2JDU7;F7BDR1	Q61553;A0A0G2JDU7	23;14;9	23;14;9	23;14;9	Fascin	Fscn1	sp|Q61553|FSCN1_MOUSE Fascin OS=Mus musculus OX=10090 GN=Fscn1 PE=1 SV=4;tr|A0A0G2JDU7|A0A0G2JDU7_MOUSE Fascin OS=Mus musculus OX=10090 GN=Fscn1 PE=1 SV=1	3	23	23	23	19	19	22	18	18	17	19	19	22	18	18	17	19	19	22	18	18	17	56	56	56	54.507	493	493;332;241	3.27	108	27	44	57	45	0	204.55	By MS/MS	By MS/MS	By MS/MS	By MS/MS	By MS/MS	By MS/MS
P06745;A0A0U1RQ72;A0A0U1RP97;A0A0U1RQ18	P06745	23;7;6;6	23;7;6;6	16;6;6;4	Glucose-6-phosphate isomerase	Gpi	sp|P06745|G6PI_MOUSE Glucose-6-phosphate isomerase OS=Mus musculus OX=10090 GN=Gpi PE=1 SV=4	4	23	23	16	15	21	21	20	19	17	15	21	21	20	19	17	11	14	14	13	14	12	52.5	52.5	35.7	62.766	558	558;130;152;191	3.62	155	21	72	79	119	0	323.31	By MS/MS	By MS/MS	By MS/MS	By MS/MS	By MS/MS	By MS/MS
Q8R080	Q8R080	23	23	23	G2 and S phase-expressed protein 1	Gtse1	sp|Q8R080|GTSE1_MOUSE G2 and S phase-expressed protein 1 OS=Mus musculus OX=10090 GN=Gtse1 PE=1 SV=2	1	23	23	23	19	15	19	14	20	17	19	15	19	14	20	17	19	15	19	14	20	17	38.6	38.6	38.6	78.751	741	741	3.37	38	25	42	30	9	0	100.95	By MS/MS	By MS/MS	By MS/MS	By MS/MS	By MS/MS	By MS/MS
Q00547	Q00547	23	23	23	Hyaluronan mediated motility receptor	Hmmr	sp|Q00547|HMMR_MOUSE Hyaluronan mediated motility receptor OS=Mus musculus OX=10090 GN=Hmmr PE=1 SV=4	1	23	23	23	13	12	16	17	18	16	13	12	16	17	18	16	13	12	16	17	18	16	42.3	42.3	42.3	91.784	794	794	3.7	35	17	31	48	15	0	143.4	By MS/MS	By MS/MS	By MS/MS	By MS/MS	By MS/MS	By MS/MS
Q9Z2X1;J3QM80;J3QMT0;J3QP45;J3QNH2;J3QMV8	Q9Z2X1;J3QM80;J3QMT0	23;20;18;5;2;2	23;20;18;5;2;2	21;20;18;5;2;2	Heterogeneous nuclear ribonucleoprotein F;Heterogeneous nuclear ribonucleoprotein F, N-terminally processed	Hnrnpf	sp|Q9Z2X1|HNRPF_MOUSE Heterogeneous nuclear ribonucleoprotein F OS=Mus musculus OX=10090 GN=Hnrnpf PE=1 SV=3;tr|J3QM80|J3QM80_MOUSE Heterogeneous nuclear ribonucleoprotein F (Fragment) OS=Mus musculus OX=10090 GN=Hnrnpf PE=1 SV=8;tr|J3QMT0|J3QMT0_MOUSE Het	6	23	23	21	19	22	21	18	19	17	19	22	21	18	19	17	18	20	19	16	17	16	61.9	61.9	55.4	45.729	415	415;232;208;70;14;31	3.32	128	57	44	62	68	0	323.31	By MS/MS	By MS/MS	By MS/MS	By MS/MS	By MS/MS	By MS/MS
O88844;A0A087WPT4;A0A087WRS9;D3YVY3;A0A087WRM4	O88844	23;11;11;8;4	23;11;11;8;4	22;10;10;7;4	Isocitrate dehydrogenase [NADP] cytoplasmic	Idh1	sp|O88844|IDHC_MOUSE Isocitrate dehydrogenase [NADP] cytoplasmic OS=Mus musculus OX=10090 GN=Idh1 PE=1 SV=2	5	23	23	22	17	18	18	21	19	20	17	18	18	21	19	20	17	17	17	20	18	19	57.7	57.7	57.7	46.674	414	414;187;202;143;84	3.45	92	39	60	17	72	0	134.11	By MS/MS	By MS/MS	By MS/MS	By MS/MS	By MS/MS	By MS/MS
Q61739;A0A5F8MPB5;F6VSK8	Q61739;A0A5F8MPB5;F6VSK8	23;23;15	23;23;15	23;23;15	Integrin alpha-6;Integrin alpha-6 heavy chain;Integrin alpha-6 light chain	Itga6	sp|Q61739|ITA6_MOUSE Integrin alpha-6 OS=Mus musculus OX=10090 GN=Itga6 PE=1 SV=3;tr|A0A5F8MPB5|A0A5F8MPB5_MOUSE Integrin alpha-6 OS=Mus musculus OX=10090 GN=Itga6 PE=1 SV=1;tr|F6VSK8|F6VSK8_MOUSE Integrin alpha-6 (Fragment) OS=Mus musculus OX=10090 GN=Itg	3	23	23	23	21	18	19	18	19	17	21	18	19	18	19	17	21	18	19	18	19	17	25.8	25.8	25.8	122.16	1091	1091;1130;667	3.94	41	32	20	30	57	0	148.89	By MS/MS	By MS/MS	By MS/MS	By MS/MS	By MS/MS	By MS/MS
Q8BWY9;D3Z7B5	Q8BWY9;D3Z7B5	23;23	23;23	23;23	Protein CIP2A	Kiaa1524;C330027C09Rik	sp|Q8BWY9|CIP2A_MOUSE Protein CIP2A OS=Mus musculus OX=10090 GN=Cip2a PE=1 SV=3;tr|D3Z7B5|D3Z7B5_MOUSE Protein CIP2A OS=Mus musculus OX=10090 GN=Cip2a PE=1 SV=1	2	23	23	23	15	17	16	20	19	21	15	17	16	20	19	21	15	17	16	20	19	21	25.1	25.1	25.1	102.04	907	907;907	3.99	22	18	43	34	24	0	66.429	By MS/MS	By MS/MS	By MS/MS	By MS/MS	By MS/MS	By MS/MS
Q3V300;A0A0U1RPH8;A0A0U1RNY7	Q3V300	23;6;1	23;6;1	23;6;1	Kinesin-like protein KIF22	Kif22	sp|Q3V300|KIF22_MOUSE Kinesin-like protein KIF22 OS=Mus musculus OX=10090 GN=Kif22 PE=2 SV=2	3	23	23	23	15	14	16	14	22	14	15	14	16	14	22	14	15	14	16	14	22	14	44.8	44.8	44.8	73.189	660	660;161;151	3.67	39	26	30	16	39	0	141.66	By MS/MS	By MS/MS	By MS/MS	By MS/MS	By MS/MS	By MS/MS
P33174;E9PX57	P33174	23;1	23;1	22;0	Chromosome-associated kinesin KIF4	Kif4	sp|P33174|KIF4_MOUSE Chromosome-associated kinesin KIF4 OS=Mus musculus OX=10090 GN=Kif4 PE=1 SV=3	2	23	23	22	16	10	19	11	15	15	16	10	19	11	15	15	16	10	18	10	15	15	26.1	26.1	25.2	139.52	1231	1231;802	4.18	15	15	32	18	31	0	111.13	By MS/MS	By MS/MS	By MS/MS	By MS/MS	By MS/MS	By MS/MS
Q05CL8;A2AMD0;A0A0G2JFW4	Q05CL8	23;7;3	23;7;3	23;7;3	La-related protein 7	Larp7	sp|Q05CL8|LARP7_MOUSE La-related protein 7 OS=Mus musculus OX=10090 GN=Larp7 PE=1 SV=2	3	23	23	23	18	19	22	17	21	19	18	19	22	17	21	19	18	19	22	17	21	19	39.3	39.3	39.3	64.802	570	570;254;80	3.71	43	32	41	30	39	0	99.021	By MS/MS	By MS/MS	By MS/MS	By MS/MS	By MS/MS	By MS/MS
Q6A009;Q14B86	Q6A009;Q14B86	23;15	23;15	23;15	E3 ubiquitin-protein ligase listerin	Ltn1	sp|Q6A009|LTN1_MOUSE E3 ubiquitin-protein ligase listerin OS=Mus musculus OX=10090 GN=Ltn1 PE=1 SV=3;tr|Q14B86|Q14B86_MOUSE E3 ubiquitin-protein ligase listerin OS=Mus musculus OX=10090 GN=Ltn1 PE=1 SV=1	2	23	23	23	14	10	16	16	18	17	14	10	16	16	18	17	14	10	16	16	18	17	18.7	18.7	18.7	198.92	1767	1767;724	3.66	41	19	11	22	38	0	203.4	By MS/MS	By MS/MS	By MS/MS	By MS/MS	By MS/MS	By MS/MS
Q5PSV9;E9QK89;G3UX64	Q5PSV9;E9QK89	23;23;1	23;23;1	23;23;1	Mediator of DNA damage checkpoint protein 1	Mdc1	sp|Q5PSV9|MDC1_MOUSE Mediator of DNA damage checkpoint protein 1 OS=Mus musculus OX=10090 GN=Mdc1 PE=1 SV=1;tr|E9QK89|E9QK89_MOUSE Mediator of DNA damage checkpoint protein 1 OS=Mus musculus OX=10090 GN=Mdc1 PE=1 SV=1	3	23	23	23	18	19	21	17	19	18	18	19	21	17	19	18	18	19	21	17	19	18	22.7	22.7	22.7	184.67	1707	1707;1708;109	3.36	36	52	49	30	9	0	174.38	By MS/MS	By MS/MS	By MS/MS	By MS/MS	By MS/MS	By MS/MS
Q3U3A7;Q3UII8;Q924K8;H3BLE1	Q3U3A7;Q3UII8;Q924K8	23;23;21;11	1;1;1;1	1;1;1;1	Metastasis-associated protein MTA3	Mta3	tr|Q3U3A7|Q3U3A7_MOUSE Metastasis-associated protein MTA3 OS=Mus musculus OX=10090 GN=Mta3 PE=1 SV=1;tr|Q3UII8|Q3UII8_MOUSE Metastasis-associated protein MTA3 OS=Mus musculus OX=10090 GN=Mta3 PE=1 SV=1;sp|Q924K8|MTA3_MOUSE Metastasis-associated protein MTA	4	23	1	1	16	18	20	20	17	16	1	1	1	1	1	1	1	1	1	1	1	1	53.4	3.9	3.9	58.367	513	513;586;591;271	5.08	1			6	5	0	5.1979	By MS/MS	By MS/MS	By MS/MS	By MS/MS	By MS/MS	By MS/MS
Q99KQ4	Q99KQ4	23	23	23	Nicotinamide phosphoribosyltransferase	Nampt	sp|Q99KQ4|NAMPT_MOUSE Nicotinamide phosphoribosyltransferase OS=Mus musculus OX=10090 GN=Nampt PE=1 SV=1	1	23	23	23	19	19	21	22	21	21	19	19	21	22	21	21	19	19	21	22	21	21	54.2	54.2	54.2	55.446	491	491	3.51	103	12	65	65	54	0	184.07	By MS/MS	By MS/MS	By MS/MS	By MS/MS	By MS/MS	By MS/MS
O35685	O35685	23	23	23	Nuclear migration protein nudC	Nudc	sp|O35685|NUDC_MOUSE Nuclear migration protein nudC OS=Mus musculus OX=10090 GN=Nudc PE=1 SV=1	1	23	23	23	18	20	20	20	22	19	18	20	20	20	22	19	18	20	20	20	22	19	63.3	63.3	63.3	38.358	332	332	3.2	149	74	124	65	45	0	158.38	By MS/MS	By MS/MS	By MS/MS	By MS/MS	By MS/MS	By MS/MS
B2M1R7;A0A2R8W6L5;A0A2R8VHG2;A0A2R8W6H3	B2M1R7;A0A2R8W6L5;A0A2R8VHG2	23;17;16;5	2;0;0;0	0;0;0;0		Pcbp2	tr|B2M1R7|B2M1R7_MOUSE Poly(rC)-binding protein 2 OS=Mus musculus OX=10090 GN=Pcbp2 PE=1 SV=1;tr|A0A2R8W6L5|A0A2R8W6L5_MOUSE Poly(rC)-binding protein 2 (Fragment) OS=Mus musculus OX=10090 GN=Pcbp2 PE=1 SV=1;tr|A0A2R8VHG2|A0A2R8VHG2_MOUSE Poly(rC)-binding p	4	23	2	0	20	18	19	19	20	21	1	0	0	1	1	2	0	0	0	0	0	0	72	9.1	0	38.15	361	361;224;186;184	3	3				2	0	19.015	By MS/MS	By matching	By matching	By matching	By MS/MS	By MS/MS
Q61990	Q61990	23	2	0	Poly(rC)-binding protein 2	Pcbp2	sp|Q61990|PCBP2_MOUSE Poly(rC)-binding protein 2 OS=Mus musculus OX=10090 GN=Pcbp2 PE=1 SV=1	1	23	2	0	20	20	21	20	20	20	2	1	2	1	2	2	0	0	0	0	0	0	72.1	7.2	0	38.221	362	362	3.19	14	22	26	6	1	0	18.558	By MS/MS	By MS/MS	By MS/MS	By MS/MS	By MS/MS	By MS/MS
G5E8R3;E9QPD7;Q05920;A0A286YCC5;A0A494B912;A0A494B951	G5E8R3;E9QPD7;Q05920	23;23;22;2;2;1	23;23;22;2;2;1	23;23;22;2;2;1	Pyruvate carboxylase;Pyruvate carboxylase, mitochondrial	Pcx;Pc	tr|G5E8R3|G5E8R3_MOUSE Pyruvate carboxylase OS=Mus musculus OX=10090 GN=Pcx PE=1 SV=1;tr|E9QPD7|E9QPD7_MOUSE Pyruvate carboxylase OS=Mus musculus OX=10090 GN=Pcx PE=1 SV=1;sp|Q05920|PYC_MOUSE Pyruvate carboxylase, mitochondrial OS=Mus musculus OX=10090 GN=	6	23	23	23	16	16	22	9	16	13	16	16	22	9	16	13	16	16	22	9	16	13	29.8	29.8	29.8	129.7	1178	1178;1179;1178;116;120;97	3.8	34	19	22	20	37	0	114.5	By MS/MS	By MS/MS	By MS/MS	By MS/MS	By MS/MS	By MS/MS
Q8CEC6	Q8CEC6	23	23	23	Peptidylprolyl isomerase domain and WD repeat-containing protein 1	Ppwd1	sp|Q8CEC6|PPWD1_MOUSE Peptidylprolyl isomerase domain and WD repeat-containing protein 1 OS=Mus musculus OX=10090 GN=Ppwd1 PE=1 SV=2	1	23	23	23	15	19	21	18	16	17	15	19	21	18	16	17	15	19	21	18	16	17	41.8	41.8	41.8	73.384	646	646	3.86	50	15	30	49	45	0	126.55	By MS/MS	By MS/MS	By MS/MS	By MS/MS	By MS/MS	By MS/MS
Q922U1;E0CYD0;F6T4V0	Q922U1	23;5;1	23;5;1	23;5;1	U4/U6 small nuclear ribonucleoprotein Prp3	Prpf3	sp|Q922U1|PRPF3_MOUSE U4/U6 small nuclear ribonucleoprotein Prp3 OS=Mus musculus OX=10090 GN=Prpf3 PE=1 SV=1	3	23	23	23	18	16	21	19	22	20	18	16	21	19	22	20	18	16	21	19	22	20	42.8	42.8	42.8	77.454	683	683;101;114	3.4	61	21	49	52	16	0	133	By MS/MS	By MS/MS	By MS/MS	By MS/MS	By MS/MS	By MS/MS
P14685;F7B7L8	P14685	23;9	23;9	23;9	26S proteasome non-ATPase regulatory subunit 3	Psmd3	sp|P14685|PSMD3_MOUSE 26S proteasome non-ATPase regulatory subunit 3 OS=Mus musculus OX=10090 GN=Psmd3 PE=1 SV=3	2	23	23	23	13	21	16	18	19	19	13	21	16	18	19	19	13	21	16	18	19	19	48.7	48.7	48.7	60.718	530	530;222	3.52	71	38	37	36	51	0	115.58	By MS/MS	By MS/MS	By MS/MS	By MS/MS	By MS/MS	By MS/MS
Q5SFM8	Q5SFM8	23	22	22	RNA-binding protein 27	Rbm27	sp|Q5SFM8|RBM27_MOUSE RNA-binding protein 27 OS=Mus musculus OX=10090 GN=Rbm27 PE=1 SV=3	1	23	22	22	14	17	19	16	18	18	13	16	18	15	17	17	13	16	18	15	17	17	21.1	21.1	21.1	118.55	1060	1060	3.48	68	4	54	39	33	0	66.403	By MS/MS	By MS/MS	By MS/MS	By MS/MS	By MS/MS	By MS/MS
Q91VI7;A0A1B0GSG5;A0A1B0GRG4;A0A1B0GRY7	Q91VI7;A0A1B0GSG5	23;22;10;6	23;22;10;6	23;22;10;6	Ribonuclease inhibitor	Rnh1	sp|Q91VI7|RINI_MOUSE Ribonuclease inhibitor OS=Mus musculus OX=10090 GN=Rnh1 PE=1 SV=1;tr|A0A1B0GSG5|A0A1B0GSG5_MOUSE Ribonuclease inhibitor OS=Mus musculus OX=10090 GN=Rnh1 PE=1 SV=1	4	23	23	23	20	14	19	20	22	22	20	14	19	20	22	22	20	14	19	20	22	22	71.3	71.3	71.3	49.816	456	456;492;199;120	3.38	78	33	36	41	42	0	203.58	By MS/MS	By MS/MS	By MS/MS	By MS/MS	By MS/MS	By MS/MS
P47911;A0A0J9YU32	P47911	23;3	23;3	23;3	60S ribosomal protein L6	Rpl6	sp|P47911|RL6_MOUSE 60S ribosomal protein L6 OS=Mus musculus OX=10090 GN=Rpl6 PE=1 SV=3	2	23	23	23	17	23	20	21	20	18	17	23	20	21	20	18	17	23	20	21	20	18	51.7	51.7	51.7	33.509	296	296;74	3.43	147	14	70	78	78	0	147.22	By MS/MS	By MS/MS	By MS/MS	By MS/MS	By MS/MS	By MS/MS
Q689Z5;F7CVW0;B2RRI2;Q3TMM7;A0A0G2JGC7;A0A0G2JEM3;A0A0G2JFU7;A0A0G2JF11;A0A0G2JG63;A0A0G2JDL6;Q7TNB8;A0A1W2P6Y8;A0A1W2P7W8	Q689Z5;F7CVW0;B2RRI2;Q3TMM7;A0A0G2JGC7;A0A0G2JEM3	23;23;23;12;12;12;5;4;3;2;1;1;1	23;23;23;12;12;12;5;4;3;2;1;1;1	23;23;23;12;12;12;5;4;3;2;1;1;1	Protein strawberry notch homolog 1	Sbno1	sp|Q689Z5|SBNO1_MOUSE Protein strawberry notch homolog 1 OS=Mus musculus OX=10090 GN=Sbno1 PE=1 SV=2;tr|F7CVW0|F7CVW0_MOUSE Protein strawberry notch homolog 1 (Fragment) OS=Mus musculus OX=10090 GN=Sbno1 PE=1 SV=1;tr|B2RRI2|B2RRI2_MOUSE Protein strawberry	13	23	23	23	14	15	16	17	16	16	14	15	16	17	16	16	14	15	16	17	16	16	25.3	25.3	25.3	153.74	1390	1390;1390;1391;663;755;785;263;211;242;133;1349;736;1230	3.93	39		39	38	34	0	139.81	By MS/MS	By MS/MS	By MS/MS	By MS/MS	By MS/MS	By MS/MS
Q9CZN7	Q9CZN7	23	23	22	Serine hydroxymethyltransferase	Shmt2	sp|Q9CZN7|GLYM_MOUSE Serine hydroxymethyltransferase, mitochondrial OS=Mus musculus OX=10090 GN=Shmt2 PE=1 SV=1	1	23	23	22	21	21	18	18	20	22	21	21	18	18	20	22	20	20	17	17	19	21	49.4	49.4	46.6	55.758	504	504	3.53	113	11	63	96	49	0	202.82	By MS/MS	By MS/MS	By MS/MS	By MS/MS	By MS/MS	By MS/MS
F8VQC1;E9Q740	F8VQC1;E9Q740	23;23	23;23	23;23	Signal recognition particle subunit SRP72	Srp72	tr|F8VQC1|F8VQC1_MOUSE Signal recognition particle subunit SRP72 OS=Mus musculus OX=10090 GN=Srp72 PE=1 SV=1;tr|E9Q740|E9Q740_MOUSE Signal recognition particle subunit SRP72 OS=Mus musculus OX=10090 GN=Srp72 PE=1 SV=1	2	23	23	23	19	18	18	22	22	21	19	18	18	22	22	21	19	18	18	22	22	21	47.1	47.1	47.1	74.656	671	671;610	3.54	87	10	30	67	47	0	323.31	By MS/MS	By MS/MS	By MS/MS	By MS/MS	By MS/MS	By MS/MS
Q80X82;D3Z2M2;S4R2Q3;F6UJ99	Q80X82	23;2;2;1	23;2;2;1	23;2;2;1	Symplekin	Sympk	sp|Q80X82|SYMPK_MOUSE Symplekin OS=Mus musculus OX=10090 GN=Sympk PE=1 SV=2	4	23	23	23	14	18	16	16	12	13	14	18	16	16	12	13	14	18	16	16	12	13	21	21	21	142.62	1288	1288;198;234;143	3.91	42	14	29	31	47	0	153.25	By MS/MS	By MS/MS	By MS/MS	By MS/MS	By MS/MS	By MS/MS
Q569Z6;Q8BZN7;F6YH92;F7AB07;F6YSQ2	Q569Z6;Q8BZN7	23;16;4;1;1	23;16;4;1;1	22;16;3;1;1	Thyroid hormone receptor-associated protein 3	Thrap3	sp|Q569Z6|TR150_MOUSE Thyroid hormone receptor-associated protein 3 OS=Mus musculus OX=10090 GN=Thrap3 PE=1 SV=1;tr|Q8BZN7|Q8BZN7_MOUSE Thyroid hormone receptor-associated protein 3 OS=Mus musculus OX=10090 GN=Thrap3 PE=1 SV=1	5	23	23	22	18	18	17	14	17	18	18	18	17	14	17	18	17	17	16	13	16	17	26.7	26.7	26.7	108.18	951	951;709;194;43;135	2.95	72	45	34	32	12	0	88.479	By MS/MS	By MS/MS	By MS/MS	By MS/MS	By MS/MS	By MS/MS
Q6ZQF0;A0A087WPG9;A0A087WS55	Q6ZQF0	23;3;2	23;3;2	23;3;2	DNA topoisomerase 2-binding protein 1	Topbp1	sp|Q6ZQF0|TOPB1_MOUSE DNA topoisomerase 2-binding protein 1 OS=Mus musculus OX=10090 GN=Topbp1 PE=1 SV=2	3	23	23	23	13	10	18	9	14	9	13	10	18	9	14	9	13	10	18	9	14	9	20	20	20	168.86	1515	1515;130;257	4.45	6	16	18	30	23	0	79.468	By MS/MS	By MS/MS	By MS/MS	By MS/MS	By MS/MS	By MS/MS
A2APB8	A2APB8	23	23	23	Targeting protein for Xklp2	Tpx2	sp|A2APB8|TPX2_MOUSE Targeting protein for Xklp2 OS=Mus musculus OX=10090 GN=Tpx2 PE=1 SV=1	1	23	23	23	18	17	19	18	22	19	18	17	19	18	22	19	18	17	19	18	22	19	34.4	34.4	34.4	85.893	745	745	3.38	79	21	48	52	31	0	116.95	By MS/MS	By MS/MS	By MS/MS	By MS/MS	By MS/MS	By MS/MS
Q64127;E9Q1U8	Q64127;E9Q1U8	23;20	23;20	21;18	Transcription intermediary factor 1-alpha	Trim24	sp|Q64127|TIF1A_MOUSE Transcription intermediary factor 1-alpha OS=Mus musculus OX=10090 GN=Trim24 PE=1 SV=1;tr|E9Q1U8|E9Q1U8_MOUSE Transcription intermediary factor 1-alpha OS=Mus musculus OX=10090 GN=Trim24 PE=1 SV=1	2	23	23	21	16	14	20	12	15	12	16	14	20	12	15	12	15	13	18	11	13	11	29.1	29.1	27.1	116.66	1051	1051;981	3.41	43	40	20	8	37	0	126.99	By MS/MS	By MS/MS	By MS/MS	By MS/MS	By MS/MS	By MS/MS
P13439;D6RJ62	P13439	23;2	23;2	23;2	Uridine 5-monophosphate synthase;Orotate phosphoribosyltransferase;Orotidine 5-phosphate decarboxylase	Umps	sp|P13439|UMPS_MOUSE Uridine 5-monophosphate synthase OS=Mus musculus OX=10090 GN=Umps PE=1 SV=3	2	23	23	23	16	18	20	18	17	18	16	18	20	18	17	18	16	18	20	18	17	18	67.4	67.4	67.4	52.292	481	481;57	3.61	125		19	74	90	0	214.03	By MS/MS	By MS/MS	By MS/MS	By MS/MS	By MS/MS	By MS/MS
Q924C1	Q924C1	23	23	23	Exportin-5	Xpo5	sp|Q924C1|XPO5_MOUSE Exportin-5 OS=Mus musculus OX=10090 GN=Xpo5 PE=1 SV=1	1	23	23	23	16	21	19	21	17	18	16	21	19	21	17	18	16	21	19	21	17	18	27.2	27.2	27.2	136.97	1204	1204	3.52	61	58	21	18	59	0	122.2	By MS/MS	By MS/MS	By MS/MS	By MS/MS	By MS/MS	By MS/MS
Q9CU65;A0A286YCD5	Q9CU65	23;1	23;1	21;1	Zinc finger MYM-type protein 2	Zmym2	sp|Q9CU65|ZMYM2_MOUSE Zinc finger MYM-type protein 2 OS=Mus musculus OX=10090 GN=Zmym2 PE=1 SV=3	2	23	23	21	17	13	21	12	14	13	17	13	21	12	14	13	15	11	19	11	12	11	25.5	25.5	23.3	154.64	1376	1376;290	4.22	12	15	34	17	29	0	60.158	By MS/MS	By MS/MS	By MS/MS	By MS/MS	By MS/MS	By MS/MS
P16460	P16460	22	22	22	Argininosuccinate synthase	Ass1	sp|P16460|ASSY_MOUSE Argininosuccinate synthase OS=Mus musculus OX=10090 GN=Ass1 PE=1 SV=1	1	22	22	22	17	15	19	20	19	17	17	15	19	20	19	17	17	15	19	20	19	17	57	57	57	46.584	412	412	3.87	101	13	18	74	101	0	230.4	By MS/MS	By MS/MS	By MS/MS	By MS/MS	By MS/MS	By MS/MS
Q8K2F0;A2AKA9;A2AKB0	Q8K2F0;A2AKA9	22;20;7	22;20;7	16;15;7	Bromodomain-containing protein 3	Brd3	sp|Q8K2F0|BRD3_MOUSE Bromodomain-containing protein 3 OS=Mus musculus OX=10090 GN=Brd3 PE=1 SV=2;tr|A2AKA9|A2AKA9_MOUSE Bromodomain-containing protein 3 (Fragment) OS=Mus musculus OX=10090 GN=Brd3 PE=1 SV=1	3	22	22	16	17	16	21	11	16	17	17	16	21	11	16	17	12	11	15	8	12	13	33.6	33.6	26.9	79.761	726	726;682;90	3.61	45	55	38	33	38	0	113.04	By MS/MS	By MS/MS	By MS/MS	By MS/MS	By MS/MS	By MS/MS
Q9ESU6;Q3UH70;B0V2V6;A0A494BAK1;A0A494BBD0;D6RGP2;A0A2R8VHW4	Q9ESU6;Q3UH70;B0V2V6;A0A494BAK1	22;22;18;18;5;5;1	16;16;12;12;5;5;1	16;16;12;12;5;5;1	Bromodomain-containing protein 4	Brd4	sp|Q9ESU6|BRD4_MOUSE Bromodomain-containing protein 4 OS=Mus musculus OX=10090 GN=Brd4 PE=1 SV=2;tr|Q3UH70|Q3UH70_MOUSE Bromodomain-containing protein 4 OS=Mus musculus OX=10090 GN=Brd4 PE=1 SV=1;tr|B0V2V6|B0V2V6_MOUSE Bromodomain-containing protein 4 (Fra	7	22	16	16	15	15	17	11	13	14	10	10	11	8	9	10	10	10	11	8	9	10	18.4	14.9	14.9	155.89	1400	1400;1401;557;572;133;146;169	3.76	21	14	13	17	20	0	48.462	By MS/MS	By MS/MS	By MS/MS	By MS/MS	By MS/MS	By MS/MS
Q02248;E9Q6A9;D3YUH4;F7BAC9;F7CRC6;D3Z5Q1;E9PW26;F6QZ47;D3Z7S6	Q02248;E9Q6A9	22;19;7;5;3;2;2;2;1	22;19;7;5;3;2;2;2;1	19;17;7;5;2;2;2;2;1	Catenin beta-1	Ctnnb1	sp|Q02248|CTNB1_MOUSE Catenin beta-1 OS=Mus musculus OX=10090 GN=Ctnnb1 PE=1 SV=1;tr|E9Q6A9|E9Q6A9_MOUSE Catenin beta-1 OS=Mus musculus OX=10090 GN=Ctnnb1 PE=1 SV=1	9	22	22	19	17	17	21	15	12	13	17	17	21	15	12	13	14	16	18	13	11	11	39.1	39.1	35.1	85.47	781	781;607;174;169;174;83;90;145;42	3.6	56	59	46	30	50	0	163.28	By MS/MS	By MS/MS	By MS/MS	By MS/MS	By MS/MS	By MS/MS
O08788;E9Q586;E9Q3M3;D3YX34;D3Z2M9;D3YYG9	O08788;E9Q586;E9Q3M3;D3YX34	22;22;22;20;2;2	22;22;22;20;2;2	22;22;22;20;2;2	Dynactin subunit 1	Dctn1	sp|O08788|DCTN1_MOUSE Dynactin subunit 1 OS=Mus musculus OX=10090 GN=Dctn1 PE=1 SV=3;tr|E9Q586|E9Q586_MOUSE Dynactin subunit 1 OS=Mus musculus OX=10090 GN=Dctn1 PE=1 SV=1;tr|E9Q3M3|E9Q3M3_MOUSE Dynactin subunit 1 OS=Mus musculus OX=10090 GN=Dctn1 PE=1 SV=1	6	22	22	22	11	14	14	16	18	16	11	14	14	16	18	16	11	14	14	16	18	16	23.2	23.2	23.2	141.67	1281	1281;1239;1264;1142;159;189	4.36	26	8	12	37	48	0	115.81	By MS/MS	By MS/MS	By MS/MS	By MS/MS	By MS/MS	By MS/MS
F8VQ54;Q8R418;A0A1Y7VJD6	F8VQ54;Q8R418	22;20;2	22;20;2	22;20;2	Endoribonuclease Dicer	Dicer1	tr|F8VQ54|F8VQ54_MOUSE Endoribonuclease Dicer OS=Mus musculus OX=10090 GN=Dicer1 PE=1 SV=1;sp|Q8R418|DICER_MOUSE Endoribonuclease Dicer OS=Mus musculus OX=10090 GN=Dicer1 PE=1 SV=3	3	22	22	22	15	13	19	10	15	18	15	13	19	10	15	18	15	13	19	10	15	18	14.7	14.7	14.7	215.77	1906	1906;1916;411	4.4	14	6	37	28	34	0	90.995	By MS/MS	By MS/MS	By MS/MS	By MS/MS	By MS/MS	By MS/MS
Q62188;Q3TT92;E9PWE8	Q62188;Q3TT92;E9PWE8	22;21;21	19;18;18	17;17;17	Dihydropyrimidinase-related protein 3	Dpysl3	sp|Q62188|DPYL3_MOUSE Dihydropyrimidinase-related protein 3 OS=Mus musculus OX=10090 GN=Dpysl3 PE=1 SV=1;tr|Q3TT92|Q3TT92_MOUSE Dihydropyrimidinase-related protein 3 OS=Mus musculus OX=10090 GN=Dpysl3 PE=1 SV=1;tr|E9PWE8|E9PWE8_MOUSE Dihydropyrimidinase-re	3	22	19	17	20	17	20	17	20	18	17	15	17	15	17	16	15	14	15	13	15	14	54.2	50	47.2	61.936	570	570;568;683	3.71	74	17	50	30	70	0	121.47	By MS/MS	By MS/MS	By MS/MS	By MS/MS	By MS/MS	By MS/MS
Q9D8N0	Q9D8N0	22	22	22	Elongation factor 1-gamma	Eef1g	sp|Q9D8N0|EF1G_MOUSE Elongation factor 1-gamma OS=Mus musculus OX=10090 GN=Eef1g PE=1 SV=3	1	22	22	22	17	17	19	20	20	19	17	17	19	20	20	19	17	17	19	20	20	19	49	49	49	50.06	437	437	3.09	153	106	60	34	72	0	323.31	By MS/MS	By MS/MS	By MS/MS	By MS/MS	By MS/MS	By MS/MS
Q91VC3;A0A0N4SVP8;A2AFK7;E9PV04;A0A0N4SVM5;D6RJ60;D6RJ11	Q91VC3;A0A0N4SVP8;A2AFK7;E9PV04	22;17;16;15;6;2;2	18;13;12;11;4;0;0	18;13;12;11;4;0;0	Eukaryotic initiation factor 4A-III;Eukaryotic initiation factor 4A-III, N-terminally processed	Eif4a3;Gm8994	sp|Q91VC3|IF4A3_MOUSE Eukaryotic initiation factor 4A-III OS=Mus musculus OX=10090 GN=Eif4a3 PE=1 SV=3;tr|A0A0N4SVP8|A0A0N4SVP8_MOUSE RNA helicase OS=Mus musculus OX=10090 GN=Eif4a3l2 PE=3 SV=1;tr|A2AFK7|A2AFK7_MOUSE RNA helicase (Fragment) OS=Mus musculus	7	22	18	18	16	20	20	19	17	18	13	16	16	15	13	15	13	16	16	15	13	15	55.7	49.9	49.9	46.839	411	411;411;299;411;266;96;97	3.34	89	30	38	41	47	0	87.868	By MS/MS	By MS/MS	By MS/MS	By MS/MS	By MS/MS	By MS/MS
Q6PGL7;A0A0N4SV74;A0A0N4SUJ0	Q6PGL7;A0A0N4SV74;A0A0N4SUJ0	22;17;17	22;17;17	22;17;17	WASH complex subunit FAM21	Fam21	sp|Q6PGL7|WASC2_MOUSE WASH complex subunit 2 OS=Mus musculus OX=10090 GN=Washc2 PE=1 SV=1;tr|A0A0N4SV74|A0A0N4SV74_MOUSE WASH complex subunit 2 (Fragment) OS=Mus musculus OX=10090 GN=Washc2 PE=1 SV=1;tr|A0A0N4SUJ0|A0A0N4SUJ0_MOUSE WASH complex subunit 2 (F	3	22	22	22	13	12	16	15	15	13	13	12	16	15	15	13	13	12	16	15	15	13	25.8	25.8	25.8	145.31	1334	1334;900;1051	3.46	25	37	36	17	13	0	95.083	By MS/MS	By MS/MS	By MS/MS	By MS/MS	By MS/MS	By MS/MS
Q91W43	Q91W43	22	22	22	Glycine dehydrogenase (decarboxylating), mitochondrial	Gldc	sp|Q91W43|GCSP_MOUSE Glycine dehydrogenase (decarboxylating), mitochondrial OS=Mus musculus OX=10090 GN=Gldc PE=1 SV=1	1	22	22	22	15	14	16	15	15	16	15	14	16	15	15	16	15	14	16	15	15	16	32.6	32.6	32.6	113.27	1025	1025	4.05	68	17	16	56	89	0	115.91	By MS/MS	By MS/MS	By MS/MS	By MS/MS	By MS/MS	By MS/MS
P26443;F7CFA5	P26443	22;5	22;5	22;5	Glutamate dehydrogenase 1, mitochondrial	Glud1	sp|P26443|DHE3_MOUSE Glutamate dehydrogenase 1, mitochondrial OS=Mus musculus OX=10090 GN=Glud1 PE=1 SV=1	2	22	22	22	20	19	21	19	20	20	20	19	21	19	20	20	20	19	21	19	20	20	46.2	46.2	46.2	61.336	558	558;144	3.61	127	50	48	71	102	0	224.6	By MS/MS	By MS/MS	By MS/MS	By MS/MS	By MS/MS	By MS/MS
Q8R081;G5E924;G3UY38;G3UY56	Q8R081;G5E924;G3UY38	22;22;19;5	22;22;19;5	22;22;19;5	Heterogeneous nuclear ribonucleoprotein L	Hnrnpl	sp|Q8R081|HNRPL_MOUSE Heterogeneous nuclear ribonucleoprotein L OS=Mus musculus OX=10090 GN=Hnrnpl PE=1 SV=2;tr|G5E924|G5E924_MOUSE Heterogeneous nuclear ribonucleoprotein L (Fragment) OS=Mus musculus OX=10090 GN=Hnrnpl PE=1 SV=1;tr|G3UY38|G3UY38_MOUSE Het	4	22	22	22	21	21	21	20	20	20	21	21	21	20	20	20	21	21	21	20	20	20	53.6	53.6	53.6	63.963	586	586;615;456;201	3.44	199	61	84	73	138	0	323.31	By MS/MS	By MS/MS	By MS/MS	By MS/MS	By MS/MS	By MS/MS
Q00PI9;A0A494BAL6	Q00PI9	22;1	22;1	22;1	Heterogeneous nuclear ribonucleoprotein U-like protein 2	Hnrnpul2	sp|Q00PI9|HNRL2_MOUSE Heterogeneous nuclear ribonucleoprotein U-like protein 2 OS=Mus musculus OX=10090 GN=Hnrnpul2 PE=1 SV=2	2	22	22	22	19	20	21	20	18	17	19	20	21	20	18	17	19	20	21	20	18	17	34.4	34.4	34.4	84.939	745	745;120	2.87	112	47	32	15	43	0	112.26	By MS/MS	By MS/MS	By MS/MS	By MS/MS	By MS/MS	By MS/MS
Q9CPN8	Q9CPN8	22	19	18	Insulin-like growth factor 2 mRNA-binding protein 3	Igf2bp3	sp|Q9CPN8|IF2B3_MOUSE Insulin-like growth factor 2 mRNA-binding protein 3 OS=Mus musculus OX=10090 GN=Igf2bp3 PE=1 SV=1	1	22	19	18	19	19	20	12	14	16	18	18	18	10	13	14	17	17	17	9	12	13	42.3	38.2	35.9	63.574	579	579	3.67	70	10	42	33	58	0	121.66	By MS/MS	By MS/MS	By MS/MS	By MS/MS	By MS/MS	By MS/MS
Q07113	Q07113	22	22	22	Cation-independent mannose-6-phosphate receptor	Igf2r	sp|Q07113|MPRI_MOUSE Cation-independent mannose-6-phosphate receptor OS=Mus musculus OX=10090 GN=Igf2r PE=1 SV=1	1	22	22	22	16	16	20	8	9	12	16	16	20	8	9	12	16	16	20	8	9	12	10.8	10.8	10.8	273.81	2483	2483	4.3	12	7	35	14	29	0	72.233	By MS/MS	By MS/MS	By MS/MS	By MS/MS	By MS/MS	By MS/MS
Q7TT37	Q7TT37	22	22	22	Elongator complex protein 1	Ikbkap	sp|Q7TT37|ELP1_MOUSE Elongator complex protein 1 OS=Mus musculus OX=10090 GN=Elp1 PE=1 SV=2	1	22	22	22	17	15	20	17	15	16	17	15	20	17	15	16	17	15	20	17	15	16	21.1	21.1	21.1	149.58	1333	1333	3.84	57	27	21	50	57	0	118.35	By MS/MS	By MS/MS	By MS/MS	By MS/MS	By MS/MS	By MS/MS
Q9EPL8;A0A140LHD0	Q9EPL8	22;1	22;1	21;1	Importin-7	Ipo7	sp|Q9EPL8|IPO7_MOUSE Importin-7 OS=Mus musculus OX=10090 GN=Ipo7 PE=1 SV=2	2	22	22	21	11	14	14	19	17	15	11	14	14	19	17	15	10	14	13	18	16	14	30.7	30.7	29.8	119.49	1038	1038;70	3.69	59	10	28	46	42	0	150.02	By MS/MS	By MS/MS	By MS/MS	By MS/MS	By MS/MS	By MS/MS
Q9QWT9;G3UXN2	Q9QWT9	22;9	22;9	5;2	Kinesin-like protein KIFC1	Kifc1	sp|Q9QWT9|KIFC1_MOUSE Kinesin-like protein KIFC1 OS=Mus musculus OX=10090 GN=Kifc1 PE=1 SV=2	2	22	22	5	15	15	15	11	15	18	15	15	15	11	15	18	3	4	3	3	5	5	43	43	15.1	74.152	674	674;218	3.88	30	8	35	36	23	0	93.138	By MS/MS	By MS/MS	By MS/MS	By MS/MS	By MS/MS	By MS/MS
P97386;Q80ZH7;K4DI59;B1AT03;Q3UC82;Q3TJN5;G3UYI8	P97386;Q80ZH7;K4DI59;B1AT03;Q3UC82;Q3TJN5	22;22;22;21;21;14;3	22;22;22;21;21;14;3	22;22;22;21;21;14;3	DNA ligase 3;DNA ligase	Lig3	sp|P97386|DNLI3_MOUSE DNA ligase 3 OS=Mus musculus OX=10090 GN=Lig3 PE=1 SV=2;tr|Q80ZH7|Q80ZH7_MOUSE DNA ligase OS=Mus musculus OX=10090 GN=Lig3 PE=1 SV=1;tr|K4DI59|K4DI59_MOUSE DNA ligase OS=Mus musculus OX=10090 GN=Lig3 PE=1 SV=1;tr|B1AT03|B1AT03_MOUSE D	7	22	22	22	17	14	19	16	18	19	17	14	19	16	18	19	17	14	19	16	18	19	25.5	25.5	25.5	113.07	1015	1015;1012;1016;953;1011;431;174	3.71	37	28	56	17	36	0	103.39	By MS/MS	By MS/MS	By MS/MS	By MS/MS	By MS/MS	By MS/MS
P24527	P24527	22	22	22	Leukotriene A-4 hydrolase	Lta4h	sp|P24527|LKHA4_MOUSE Leukotriene A-4 hydrolase OS=Mus musculus OX=10090 GN=Lta4h PE=1 SV=4	1	22	22	22	17	17	21	16	17	17	17	17	21	16	17	17	17	17	21	16	17	17	45.2	45.2	45.2	69.05	611	611	3.19	90	54	42	23	47	0	120.31	By MS/MS	By MS/MS	By MS/MS	By MS/MS	By MS/MS	By MS/MS
P23249;D3Z3E8;E9PW39;D3YVL0	P23249;D3Z3E8;E9PW39;D3YVL0	22;22;22;22	22;22;22;22	22;22;22;22	Putative helicase MOV-10	Mov10	sp|P23249|MOV10_MOUSE Putative helicase MOV-10 OS=Mus musculus OX=10090 GN=Mov10 PE=1 SV=2;tr|D3Z3E8|D3Z3E8_MOUSE RNA helicase OS=Mus musculus OX=10090 GN=Mov10 PE=1 SV=1;tr|E9PW39|E9PW39_MOUSE RNA helicase OS=Mus musculus OX=10090 GN=Mov10 PE=1 SV=1;tr|D3	4	22	22	22	14	18	21	19	16	16	14	18	21	19	16	16	14	18	21	19	16	16	27.6	27.6	27.6	113.58	1004	1004;1004;1077;1077	3.14	78	25	16	37	31	0	142.28	By MS/MS	By MS/MS	By MS/MS	By MS/MS	By MS/MS	By MS/MS
Q8BP47;A0A498WGK2;A0A494BB89;A0A494BAX5;A0A494BAW6;A0A494B927;A0A494B996;A0A494B9G0;A0A494B949	Q8BP47;A0A498WGK2;A0A494BB89;A0A494BAX5	22;22;19;18;7;7;3;2;2	22;22;19;18;7;7;3;2;2	22;22;19;18;7;7;3;2;2	Asparagine--tRNA ligase, cytoplasmic	Nars	sp|Q8BP47|SYNC_MOUSE Asparagine--tRNA ligase, cytoplasmic OS=Mus musculus OX=10090 GN=NARS1 PE=1 SV=2;tr|A0A498WGK2|A0A498WGK2_MOUSE Asparagine--tRNA ligase OS=Mus musculus OX=10090 GN=Nars PE=1 SV=1;tr|A0A494BB89|A0A494BB89_MOUSE Asparaginyl-tRNA syntheta	9	22	22	22	12	13	15	21	17	17	12	13	15	21	17	17	12	13	15	21	17	17	38.6	38.6	38.6	64.279	559	559;558;517;497;164;210;127;69;70	3.42	88	13	24	44	52	0	179.52	By MS/MS	By MS/MS	By MS/MS	By MS/MS	By MS/MS	By MS/MS
Q99JX7;V9GXF3;V9GXW3;V9GXM5	Q99JX7;V9GXF3	22;12;9;4	22;12;9;4	22;12;9;4	Nuclear RNA export factor 1	Nxf1	sp|Q99JX7|NXF1_MOUSE Nuclear RNA export factor 1 OS=Mus musculus OX=10090 GN=Nxf1 PE=1 SV=3;tr|V9GXF3|V9GXF3_MOUSE Nuclear RNA export factor 1 OS=Mus musculus OX=10090 GN=Nxf1 PE=1 SV=1	4	22	22	22	19	18	21	19	19	19	19	18	21	19	19	19	19	18	21	19	19	19	43.2	43.2	43.2	70.299	618	618;418;282;89	3.71	90	11	29	58	74	0	153.32	By MS/MS	By MS/MS	By MS/MS	By MS/MS	By MS/MS	By MS/MS
P60335	P60335	22	17	17	Poly(rC)-binding protein 1	Pcbp1	sp|P60335|PCBP1_MOUSE Poly(rC)-binding protein 1 OS=Mus musculus OX=10090 GN=Pcbp1 PE=1 SV=1	1	22	17	17	20	21	21	20	22	21	15	16	16	15	17	16	15	16	16	15	17	16	84.6	75.8	75.8	37.497	356	356	3.44	137	83	71	76	83	0	321.54	By MS/MS	By MS/MS	By MS/MS	By MS/MS	By MS/MS	By MS/MS
Q922R8;Q3TML0	Q922R8;Q3TML0	22;20	22;20	22;20	Protein disulfide-isomerase A6	Pdia6	sp|Q922R8|PDIA6_MOUSE Protein disulfide-isomerase A6 OS=Mus musculus OX=10090 GN=Pdia6 PE=1 SV=3;tr|Q3TML0|Q3TML0_MOUSE Protein disulfide-isomerase A6 OS=Mus musculus OX=10090 GN=Pdia6 PE=1 SV=1	2	22	22	22	17	18	19	20	20	20	17	18	19	20	20	20	17	18	19	20	20	20	56.8	56.8	56.8	48.1	440	440;445	3.27	114	20	25	56	55	0	236.05	By MS/MS	By MS/MS	By MS/MS	By MS/MS	By MS/MS	By MS/MS
P51432;A0A494B9C1;A0A494BAY4;Q8C8I0	P51432	22;9;7;6	22;9;7;6	22;9;7;6	1-phosphatidylinositol 4,5-bisphosphate phosphodiesterase beta-3	Plcb3	sp|P51432|PLCB3_MOUSE 1-phosphatidylinositol 4,5-bisphosphate phosphodiesterase beta-3 OS=Mus musculus OX=10090 GN=Plcb3 PE=1 SV=2	4	22	22	22	20	14	15	14	19	17	20	14	15	14	19	17	20	14	15	14	19	17	22.7	22.7	22.7	139.49	1234	1234;508;191;378	4	47		27	55	43	0	185.27	By MS/MS	By MS/MS	By MS/MS	By MS/MS	By MS/MS	By MS/MS
Q91UZ1;V9GXQ9;A2AT91	Q91UZ1;V9GXQ9;A2AT91	22;21;20	22;21;20	21;21;20	Phosphoinositide phospholipase C	Plcb4	tr|Q91UZ1|Q91UZ1_MOUSE 1-phosphatidylinositol 4,5-bisphosphate phosphodiesterase OS=Mus musculus OX=10090 GN=Plcb4 PE=1 SV=1;tr|V9GXQ9|V9GXQ9_MOUSE Phosphoinositide phospholipase C OS=Mus musculus OX=10090 GN=Plcb4 PE=1 SV=1;tr|A2AT91|A2AT91_MOUSE Phosphoi	3	22	22	21	16	12	19	5	3	7	16	12	19	5	3	7	15	12	18	5	3	6	23.2	23.2	22	134.53	1175	1175;1022;883	4.64	5	4	22	17	24	0	66.298	By MS/MS	By MS/MS	By MS/MS	By MS/MS	By MS/MS	By MS/MS
Q9D819	Q9D819	22	22	22	Inorganic pyrophosphatase	Ppa1	sp|Q9D819|IPYR_MOUSE Inorganic pyrophosphatase OS=Mus musculus OX=10090 GN=Ppa1 PE=1 SV=1	1	22	22	22	18	20	21	21	21	19	18	20	21	21	21	19	18	20	21	21	21	19	82.4	82.4	82.4	32.667	289	289	3.35	149	52	65	80	73	0	309.93	By MS/MS	By MS/MS	By MS/MS	By MS/MS	By MS/MS	By MS/MS
P62137	P62137	22	22	8	Serine/threonine-protein phosphatase PP1-alpha catalytic subunit	Ppp1ca	sp|P62137|PP1A_MOUSE Serine/threonine-protein phosphatase PP1-alpha catalytic subunit OS=Mus musculus OX=10090 GN=Ppp1ca PE=1 SV=1	1	22	22	8	17	19	21	19	19	17	17	19	21	19	19	17	5	7	8	7	7	6	69.7	69.7	20.6	37.54	330	330	3.61	135	1	38	57	108	0	323.31	By MS/MS	By MS/MS	By MS/MS	By MS/MS	By MS/MS	By MS/MS
Q9JIF0;A0A171KXD3;A0A140LHF7;A0A140LJF4;Q6PAK3	Q9JIF0;A0A171KXD3;A0A140LHF7;A0A140LJF4	22;22;15;13;4	22;22;15;13;4	9;9;9;7;1	Protein arginine N-methyltransferase 1	Prmt1	sp|Q9JIF0|ANM1_MOUSE Protein arginine N-methyltransferase 1 OS=Mus musculus OX=10090 GN=Prmt1 PE=1 SV=1;tr|A0A171KXD3|A0A171KXD3_MOUSE Protein arginine N-methyltransferase 1 OS=Mus musculus OX=10090 GN=Prmt1 PE=1 SV=1;tr|A0A140LHF7|A0A140LHF7_MOUSE Protein	5	22	22	9	16	21	21	21	16	16	16	21	21	21	16	16	7	8	9	8	7	7	58.2	58.2	20.2	42.435	371	371;318;208;193;394	3.58	135	45	55	63	109	0	227.97	By MS/MS	By MS/MS	By MS/MS	By MS/MS	By MS/MS	By MS/MS
Q9DAW6	Q9DAW6	22	22	22	U4/U6 small nuclear ribonucleoprotein Prp4	Prpf4	sp|Q9DAW6|PRP4_MOUSE U4/U6 small nuclear ribonucleoprotein Prp4 OS=Mus musculus OX=10090 GN=Prpf4 PE=1 SV=1	1	22	22	22	15	17	22	18	20	16	15	17	22	18	20	16	15	17	22	18	20	16	53.7	53.7	53.7	58.369	521	521	4.03	59	13	9	37	79	0	144.95	By MS/MS	By MS/MS	By MS/MS	By MS/MS	By MS/MS	By MS/MS
A0A087WPH7	A0A087WPH7	22	1	1		Psmc3	tr|A0A087WPH7|A0A087WPH7_MOUSE 26S proteasome regulatory subunit 6A (Fragment) OS=Mus musculus OX=10090 GN=Psmc3 PE=1 SV=6	1	22	1	1	20	20	20	20	21	21	1	1	1	1	1	1	1	1	1	1	1	1	65.9	5.9	5.9	34.02	305	305	2.33	5	10				0	33.218	By MS/MS	By MS/MS	By MS/MS	By MS/MS	By MS/MS	By MS/MS
P54775;A0A140LIZ5	P54775;A0A140LIZ5	22;19	22;19	22;19	26S protease regulatory subunit 6B	Psmc4	sp|P54775|PRS6B_MOUSE 26S proteasome regulatory subunit 6B OS=Mus musculus OX=10090 GN=Psmc4 PE=1 SV=2;tr|A0A140LIZ5|A0A140LIZ5_MOUSE 26S proteasome AAA-ATPase subunit RPT3 OS=Mus musculus OX=10090 GN=Psmc4 PE=1 SV=1	2	22	22	22	13	16	19	16	18	17	13	16	19	16	18	17	13	16	19	16	18	17	70.1	70.1	70.1	47.408	418	418;387	3.61	102	11	25	59	76	0	323.31	By MS/MS	By MS/MS	By MS/MS	By MS/MS	By MS/MS	By MS/MS
Q9D8W5;B1AT36;Q3TRH2	Q9D8W5;B1AT36;Q3TRH2	22;21;17	22;21;17	22;21;17	26S proteasome non-ATPase regulatory subunit 12	Psmd12	sp|Q9D8W5|PSD12_MOUSE 26S proteasome non-ATPase regulatory subunit 12 OS=Mus musculus OX=10090 GN=Psmd12 PE=1 SV=4;tr|B1AT36|B1AT36_MOUSE 26S proteasome non-ATPase regulatory subunit 12 OS=Mus musculus OX=10090 GN=Psmd12 PE=1 SV=1;tr|Q3TRH2|Q3TRH2_MOUSE 26	3	22	22	22	15	21	20	20	16	14	15	21	20	20	16	14	15	21	20	20	16	14	54.2	54.2	54.2	52.895	456	456;436;418	3.44	97	31	49	31	68	0	256.6	By MS/MS	By MS/MS	By MS/MS	By MS/MS	By MS/MS	By MS/MS
A2A8L5;F6S1X8;F6Y3V0;A0A1Y7VNR5;Q64487;G3UYU6;G3UX60;G3UWK6;E9Q7I7;E9PVW8;B9EJA3;G3UY75;Q5SPA9	A2A8L5;F6S1X8;F6Y3V0	22;16;13;5;2;2;2;2;2;2;2;2;1	22;16;13;5;2;2;2;2;2;2;2;2;1	22;16;13;5;2;2;2;2;2;2;2;2;1	Receptor-type tyrosine-protein phosphatase F	Ptprf	sp|A2A8L5|PTPRF_MOUSE Receptor-type tyrosine-protein phosphatase F OS=Mus musculus OX=10090 GN=Ptprf PE=1 SV=1;tr|F6S1X8|F6S1X8_MOUSE Protein-tyrosine-phosphatase (Fragment) OS=Mus musculus OX=10090 GN=Ptprf PE=1 SV=1;tr|F6Y3V0|F6Y3V0_MOUSE Protein-tyrosin	13	22	22	22	12	9	19	3	4	4	12	9	19	3	4	4	12	9	19	3	4	4	19.7	19.7	19.7	211.49	1898	1898;1332;1291;363;1912;1495;1502;1505;1505;1506;1508;1890;1254	4.5	3	4	18	24	9	0	87.273	By MS/MS	By MS/MS	By MS/MS	By MS/MS	By MS/MS	By MS/MS
Q8CGC6;F6SB18	Q8CGC6	22;2	22;2	22;2	RNA-binding protein 28	Rbm28	sp|Q8CGC6|RBM28_MOUSE RNA-binding protein 28 OS=Mus musculus OX=10090 GN=Rbm28 PE=1 SV=4	2	22	22	22	20	14	16	14	18	17	20	14	16	14	18	17	20	14	16	14	18	17	32.8	32.8	32.8	84.213	750	750;133	3.26	90	25	49	15	54	0	151.29	By MS/MS	By MS/MS	By MS/MS	By MS/MS	By MS/MS	By MS/MS
Q9R1T2	Q9R1T2	22	22	22	SUMO-activating enzyme subunit 1;SUMO-activating enzyme subunit 1, N-terminally processed	Sae1	sp|Q9R1T2|SAE1_MOUSE SUMO-activating enzyme subunit 1 OS=Mus musculus OX=10090 GN=Sae1 PE=1 SV=1	1	22	22	22	18	20	21	19	20	16	18	20	21	19	20	16	18	20	21	19	20	16	74	74	74	38.62	350	350	3.4	112	44	29	52	71	0	252.14	By MS/MS	By MS/MS	By MS/MS	By MS/MS	By MS/MS	By MS/MS
Q60710;F6TVP2;E9PYG9	Q60710;F6TVP2;E9PYG9	22;21;19	22;21;19	20;19;17	Deoxynucleoside triphosphate triphosphohydrolase SAMHD1	Samhd1	sp|Q60710|SAMH1_MOUSE Deoxynucleoside triphosphate triphosphohydrolase SAMHD1 OS=Mus musculus OX=10090 GN=Samhd1 PE=1 SV=3;tr|F6TVP2|F6TVP2_MOUSE Deoxynucleoside triphosphate triphosphohydrolase SAMHD1 (Fragment) OS=Mus musculus OX=10090 GN=Samhd1 PE=1 SV=	3	22	22	20	13	15	17	18	16	16	13	15	17	18	16	16	13	14	15	17	14	15	41.2	41.2	37.7	75.892	658	658;631;582	3.25	52	16	48	20	18	0	166.82	By MS/MS	By MS/MS	By MS/MS	By MS/MS	By MS/MS	By MS/MS
Q9D554	Q9D554	22	22	22	Splicing factor 3A subunit 3	Sf3a3	sp|Q9D554|SF3A3_MOUSE Splicing factor 3A subunit 3 OS=Mus musculus OX=10090 GN=Sf3a3 PE=1 SV=2	1	22	22	22	18	18	22	18	18	17	18	18	22	18	18	17	18	18	22	18	18	17	51.3	51.3	51.3	58.841	501	501	3.81	89	26	44	66	84	0	193.95	By MS/MS	By MS/MS	By MS/MS	By MS/MS	By MS/MS	By MS/MS
P48962	P48962	22	22	11	ADP/ATP translocase 1	Slc25a4	sp|P48962|ADT1_MOUSE ADP/ATP translocase 1 OS=Mus musculus OX=10090 GN=Slc25a4 PE=1 SV=4	1	22	22	11	14	17	17	19	21	20	14	17	17	19	21	20	6	8	8	9	10	9	67.4	67.4	33.9	32.904	298	298	3.78	115	77	55	56	135	0	323.31	By MS/MS	By MS/MS	By MS/MS	By MS/MS	By MS/MS	By MS/MS
Q80U70;E9PW15;F6Z494	Q80U70;E9PW15	22;21;1	22;21;1	22;21;1	Polycomb protein Suz12	Suz12	sp|Q80U70|SUZ12_MOUSE Polycomb protein Suz12 OS=Mus musculus OX=10090 GN=Suz12 PE=1 SV=2;tr|E9PW15|E9PW15_MOUSE Polycomb protein Suz12 OS=Mus musculus OX=10090 GN=Suz12 PE=1 SV=1	3	22	22	22	15	12	16	13	17	16	15	12	16	13	17	16	15	12	16	13	17	16	38.3	38.3	38.3	83.025	741	741;718;59	3.69	54	14	37	29	46	0	164.83	By MS/MS	By MS/MS	By MS/MS	By MS/MS	By MS/MS	By MS/MS
Q62351;Q8C872	Q62351;Q8C872	22;16	22;16	22;16	Transferrin receptor protein 1	Tfrc	sp|Q62351|TFR1_MOUSE Transferrin receptor protein 1 OS=Mus musculus OX=10090 GN=Tfrc PE=1 SV=1;tr|Q8C872|Q8C872_MOUSE Transferrin receptor protein 1 OS=Mus musculus OX=10090 GN=Tfrc PE=1 SV=1	2	22	22	22	13	19	19	20	15	18	13	19	19	20	15	18	13	19	19	20	15	18	35.6	35.6	35.6	85.73	763	763;515	3.84	59	31	13	44	65	0	117.98	By MS/MS	By MS/MS	By MS/MS	By MS/MS	By MS/MS	By MS/MS
Q99LG2;E9PV58;A0A1B0GT37	Q99LG2;E9PV58	22;21;5	13;13;3	13;13;3	Transportin-2	Tnpo2	sp|Q99LG2|TNPO2_MOUSE Transportin-2 OS=Mus musculus OX=10090 GN=Tnpo2 PE=1 SV=1;tr|E9PV58|E9PV58_MOUSE Transportin-2 OS=Mus musculus OX=10090 GN=Tnpo2 PE=1 SV=1	3	22	13	13	14	19	20	21	14	16	8	11	12	12	8	9	8	11	12	12	8	9	30.9	20.7	20.7	100.46	887	887;897;137	3.69	27	15	20	27	18	0	50.582	By MS/MS	By MS/MS	By MS/MS	By MS/MS	By MS/MS	By MS/MS
Q61510;Q5SU71;Q5SU72	Q61510;Q5SU71;Q5SU72	22;19;12	22;19;12	22;19;12	E3 ubiquitin/ISG15 ligase TRIM25	Trim25	sp|Q61510|TRI25_MOUSE E3 ubiquitin/ISG15 ligase TRIM25 OS=Mus musculus OX=10090 GN=Trim25 PE=1 SV=2;tr|Q5SU71|Q5SU71_MOUSE E3 ubiquitin/ISG15 ligase TRIM25 OS=Mus musculus OX=10090 GN=Trim25 PE=1 SV=1;tr|Q5SU72|Q5SU72_MOUSE E3 ubiquitin/ISG15 ligase TRIM25	3	22	22	22	13	16	21	15	19	18	13	16	21	15	19	18	13	16	21	15	19	18	41.2	41.2	41.2	71.726	634	634;626;387	3.76	67	17	25	60	52	0	99.7	By MS/MS	By MS/MS	By MS/MS	By MS/MS	By MS/MS	By MS/MS
Q8VDF2;E9Q5Y5	Q8VDF2	22;8	22;8	22;8	E3 ubiquitin-protein ligase UHRF1	Uhrf1	sp|Q8VDF2|UHRF1_MOUSE E3 ubiquitin-protein ligase UHRF1 OS=Mus musculus OX=10090 GN=Uhrf1 PE=1 SV=2	2	22	22	22	14	16	19	19	19	16	14	16	19	19	19	16	14	16	19	19	19	16	36.4	36.4	36.4	88.303	782	782;146	3.66	63		52	53	34	0	171.3	By MS/MS	By MS/MS	By MS/MS	By MS/MS	By MS/MS	By MS/MS
Q6ZQ93;F6WJB7;Z4YLQ1;Z4YN11	Q6ZQ93;F6WJB7	22;22;5;4	22;22;5;4	22;22;5;4	Ubiquitin carboxyl-terminal hydrolase 34;Ubiquitin carboxyl-terminal hydrolase	Usp34	sp|Q6ZQ93|UBP34_MOUSE Ubiquitin carboxyl-terminal hydrolase 34 OS=Mus musculus OX=10090 GN=Usp34 PE=1 SV=3;tr|F6WJB7|F6WJB7_MOUSE Ubiquitin carboxyl-terminal hydrolase 34 (Fragment) OS=Mus musculus OX=10090 GN=Usp34 PE=1 SV=1	4	22	22	22	15	12	15	9	10	15	15	12	15	9	10	15	15	12	15	9	10	15	7.5	7.5	7.5	408.21	3582	3582;3602;810;288	4.65		13	26	25	22	0	59.043	By MS/MS	By MS/MS	By MS/MS	By MS/MS	By MS/MS	By MS/MS
Q65Z40;B7ZP47;F6YCH1;G3UXQ2	Q65Z40;B7ZP47;F6YCH1	22;22;11;3	22;22;11;3	22;22;11;3	Wings apart-like protein homolog	Wapal	sp|Q65Z40|WAPL_MOUSE Wings apart-like protein homolog OS=Mus musculus OX=10090 GN=Wapl PE=1 SV=2;tr|B7ZP47|B7ZP47_MOUSE Wapal protein OS=Mus musculus OX=10090 GN=Wapl PE=1 SV=1;tr|F6YCH1|F6YCH1_MOUSE Wings apart-like protein homolog (Fragment) OS=Mus muscu	4	22	22	22	17	15	19	14	18	15	17	15	19	14	18	15	17	15	19	14	18	15	24.5	24.5	24.5	134.07	1200	1200;1194;430;160	4.33	23	18	34	41	50	0	102.64	By MS/MS	By MS/MS	By MS/MS	By MS/MS	By MS/MS	By MS/MS
Q9EPK7;E9PUW7;A0A2I3BQV5	Q9EPK7;E9PUW7;A0A2I3BQV5	22;22;21	22;22;21	22;22;21	Exportin-7	Xpo7	sp|Q9EPK7|XPO7_MOUSE Exportin-7 OS=Mus musculus OX=10090 GN=Xpo7 PE=1 SV=3;tr|E9PUW7|E9PUW7_MOUSE Exportin-7 OS=Mus musculus OX=10090 GN=Xpo7 PE=1 SV=1;tr|A0A2I3BQV5|A0A2I3BQV5_MOUSE Exportin-7 OS=Mus musculus OX=10090 GN=Xpo7 PE=1 SV=1	3	22	22	22	7	19	12	13	9	8	7	19	12	13	9	8	7	19	12	13	9	8	25.1	25.1	25.1	123.81	1087	1087;1088;1088	3.66	30	12	48	10	25	0	204.81	By MS/MS	By MS/MS	By MS/MS	By MS/MS	By MS/MS	By MS/MS
Q9CRT8;A0A1W2P7Q6;A0A1W2P7V1	Q9CRT8;A0A1W2P7Q6	22;22;3	22;22;3	22;22;3	Exportin-T	Xpot	sp|Q9CRT8|XPOT_MOUSE Exportin-T OS=Mus musculus OX=10090 GN=Xpot PE=1 SV=3;tr|A0A1W2P7Q6|A0A1W2P7Q6_MOUSE Exportin-T OS=Mus musculus OX=10090 GN=Xpot PE=1 SV=1	3	22	22	22	9	14	15	18	18	17	9	14	15	18	18	17	9	14	15	18	18	17	27.4	27.4	27.4	109.73	963	963;962;206	4.43	23	4	34	29	53	0	94.57	By MS/MS	By MS/MS	By MS/MS	By MS/MS	By MS/MS	By MS/MS
P45376;D3YVJ7	P45376	21;8	21;8	21;8	Aldose reductase	Akr1b1	sp|P45376|ALDR_MOUSE Aldo-keto reductase family 1 member B1 OS=Mus musculus OX=10090 GN=Akr1b1 PE=1 SV=3	2	21	21	21	17	19	20	18	21	19	17	19	20	18	21	19	17	19	20	18	21	19	69.9	69.9	69.9	35.732	316	316;176	3.38	137	22	46	51	85	0	224.35	By MS/MS	By MS/MS	By MS/MS	By MS/MS	By MS/MS	By MS/MS
Q4QY64;Z4YKQ9	Q4QY64;Z4YKQ9	21;21	21;21	21;21	ATPase family AAA domain-containing protein 5	Atad5	sp|Q4QY64|ATAD5_MOUSE ATPase family AAA domain-containing protein 5 OS=Mus musculus OX=10090 GN=Atad5 PE=1 SV=1;tr|Z4YKQ9|Z4YKQ9_MOUSE ATPase family AAA domain-containing protein 5 OS=Mus musculus OX=10090 GN=Atad5 PE=1 SV=1	2	21	21	21	16	8	15	8	14	12	16	8	15	8	14	12	16	8	15	8	14	12	15.5	15.5	15.5	203.91	1826	1826;1823	4.43	10	15	13	28	29	0	86.414	By MS/MS	By MS/MS	By MS/MS	By MS/MS	By MS/MS	By MS/MS
P50516;D3Z1B9;D3YWH3;D3YZ23	P50516	21;7;5;1	21;7;5;1	21;7;5;1	V-type proton ATPase catalytic subunit A	Atp6v1a	sp|P50516|VATA_MOUSE V-type proton ATPase catalytic subunit A OS=Mus musculus OX=10090 GN=Atp6v1a PE=1 SV=2	4	21	21	21	18	14	20	18	16	18	18	14	20	18	16	18	18	14	20	18	16	18	42	42	42	68.325	617	617;237;196;77	3.94	65	7	25	16	87	0	172.39	By MS/MS	By MS/MS	By MS/MS	By MS/MS	By MS/MS	By MS/MS
Q9QXK3	Q9QXK3	21	18	18	Coatomer subunit gamma-2	Copg2	sp|Q9QXK3|COPG2_MOUSE Coatomer subunit gamma-2 OS=Mus musculus OX=10090 GN=Copg2 PE=1 SV=1	1	21	18	18	10	19	17	13	11	9	7	16	14	10	8	6	7	16	14	10	8	6	29.5	25.4	25.4	97.679	871	871	3.83	23	1	19	26	15	0	57.265	By MS/MS	By MS/MS	By MS/MS	By MS/MS	By MS/MS	By MS/MS
P61202;A2AQE4	P61202;A2AQE4	21;18	21;18	21;18	COP9 signalosome complex subunit 2	Cops2	sp|P61202|CSN2_MOUSE COP9 signalosome complex subunit 2 OS=Mus musculus OX=10090 GN=Cops2 PE=1 SV=1;tr|A2AQE4|A2AQE4_MOUSE COP9 signalosome complex subunit 2 OS=Mus musculus OX=10090 GN=Cops2 PE=1 SV=1	2	21	21	21	11	13	17	14	17	16	11	13	17	14	17	16	11	13	17	14	17	16	48.1	48.1	48.1	51.596	443	443;402	3.62	81	8	14	19	78	0	159.69	By MS/MS	By MS/MS	By MS/MS	By MS/MS	By MS/MS	By MS/MS
P45481;A0A0U1RQB6;F8VPR5;A0A0U1RPL2;A0A0U1RPQ3	P45481;A0A0U1RQB6;F8VPR5	21;21;21;8;2	20;20;20;7;2	13;13;13;5;1	CREB-binding protein	Crebbp	sp|P45481|CBP_MOUSE Histone lysine acetyltransferase CREBBP OS=Mus musculus OX=10090 GN=Crebbp PE=1 SV=3;tr|A0A0U1RQB6|A0A0U1RQB6_MOUSE Histone acetyltransferase OS=Mus musculus OX=10090 GN=Crebbp PE=1 SV=1;tr|F8VPR5|F8VPR5_MOUSE Histone acetyltransferase	5	21	20	13	15	12	14	11	16	14	14	12	13	11	15	14	10	6	7	6	11	10	12.7	12.4	9.7	265.49	2441	2441;2403;2441;1107;247	3.58	33	27	21	15	29	0	84.845	By MS/MS	By MS/MS	By MS/MS	By MS/MS	By MS/MS	By MS/MS
P63154	P63154	21	21	21	Crooked neck-like protein 1	Crnkl1	sp|P63154|CRNL1_MOUSE Crooked neck-like protein 1 OS=Mus musculus OX=10090 GN=Crnkl1 PE=1 SV=1	1	21	21	21	15	18	17	19	15	18	15	18	17	19	15	18	15	18	17	19	15	18	31.6	31.6	31.6	83.415	690	690	4.01	38	17	20	46	43	0	63.268	By MS/MS	By MS/MS	By MS/MS	By MS/MS	By MS/MS	By MS/MS
Q6PGC1;Q8BN72	Q6PGC1	21;5	21;5	21;5	ATP-dependent RNA helicase Dhx29	Dhx29	sp|Q6PGC1|DHX29_MOUSE ATP-dependent RNA helicase DHX29 OS=Mus musculus OX=10090 GN=Dhx29 PE=1 SV=1	2	21	21	21	10	10	16	14	18	18	10	10	16	14	18	18	10	10	16	14	18	18	17.4	17.4	17.4	153.97	1365	1365;272	3.89	29	9	25	10	37	0	107.52	By MS/MS	By MS/MS	By MS/MS	By MS/MS	By MS/MS	By MS/MS
Q99PU8;A0A0G2JGL8;A0A0G2JE53;A0A0G2JGY7;A0A0G2JGD9;A0A0G2JGL1	Q99PU8;A0A0G2JGL8	21;21;4;2;1;1	21;21;4;2;1;1	21;21;4;2;1;1	Putative ATP-dependent RNA helicase DHX30	Dhx30	sp|Q99PU8|DHX30_MOUSE ATP-dependent RNA helicase DHX30 OS=Mus musculus OX=10090 GN=Dhx30 PE=1 SV=1;tr|A0A0G2JGL8|A0A0G2JGL8_MOUSE RNA helicase OS=Mus musculus OX=10090 GN=Dhx30 PE=1 SV=1	6	21	21	21	13	12	14	16	16	17	13	12	14	16	16	17	13	12	14	16	16	17	21.9	21.9	21.9	136.67	1217	1217;1186;175;134;101;239	4.16	33	13	16	18	58	0	92.269	By MS/MS	By MS/MS	By MS/MS	By MS/MS	By MS/MS	By MS/MS
Q6PDI5;A2ALV7;A2ALV6;A2ALV8;A2ALW1;A2ALV9	Q6PDI5;A2ALV7	21;17;9;8;7;4	21;17;9;8;7;4	21;17;9;8;7;4	Proteasome-associated protein ECM29 homolog	Ecm29;AI314180	sp|Q6PDI5|ECM29_MOUSE Proteasome adapter and scaffold protein ECM29 OS=Mus musculus OX=10090 GN=Ecpas PE=1 SV=3;tr|A2ALV7|A2ALV7_MOUSE Proteasome adapter and scaffold protein ECM29 (Fragment) OS=Mus musculus OX=10090 GN=Ecpas PE=1 SV=1	6	21	21	21	12	13	16	11	17	14	12	13	16	11	17	14	12	13	16	11	17	14	14.6	14.6	14.6	203.7	1840	1840;1490;942;538;361;246	4.46	13	7	28	23	36	0	63.43	By MS/MS	By MS/MS	By MS/MS	By MS/MS	By MS/MS	By MS/MS
A0A0R4J1L2;F6ZFU0;D3YY68;D3Z7N2	A0A0R4J1L2;F6ZFU0;D3YY68	21;20;15;9	1;1;0;1	1;1;0;1		Eef1d	tr|A0A0R4J1L2|A0A0R4J1L2_MOUSE Elongation factor 1-delta OS=Mus musculus OX=10090 GN=Eef1d PE=1 SV=1;tr|F6ZFU0|F6ZFU0_MOUSE Elongation factor 1-delta (Fragment) OS=Mus musculus OX=10090 GN=Eef1d PE=1 SV=1;tr|D3YY68|D3YY68_MOUSE Elongation factor 1-delta OS	4	21	1	1	20	21	20	20	20	20	1	1	1	1	1	1	1	1	1	1	1	1	70.8	8.2	8.2	28.728	257	257;552;190;129	3.47	5		6	6		0	6.9452	By MS/MS	By MS/MS	By MS/MS	By MS/MS	By MS/MS	By MS/MS
Q91VK2	Q91VK2	21	1	0		Eef1d	tr|Q91VK2|Q91VK2_MOUSE Eef1d protein OS=Mus musculus OX=10090 GN=Eef1d PE=1 SV=1	1	21	1	0	19	20	19	19	19	20	0	0	0	0	0	1	0	0	0	0	0	0	71.7	13.4	0	30.634	276	276	5				1		0	31.167	By matching	By matching	By matching	By matching	By matching	By MS/MS
P60229	P60229	21	21	21	Eukaryotic translation initiation factor 3 subunit E	Eif3e	sp|P60229|EIF3E_MOUSE Eukaryotic translation initiation factor 3 subunit E OS=Mus musculus OX=10090 GN=Eif3e PE=1 SV=1	1	21	21	21	16	14	17	20	17	16	16	14	17	20	17	16	16	14	17	20	17	16	52.1	52.1	52.1	52.22	445	445	3.31	98	39	49	36	53	0	159.38	By MS/MS	By MS/MS	By MS/MS	By MS/MS	By MS/MS	By MS/MS
P56960;Q8K366;F6VYQ6	P56960;Q8K366;F6VYQ6	21;20;15	21;20;15	21;20;15	Exosome component 10	Exosc10	sp|P56960|EXOSX_MOUSE Exosome component 10 OS=Mus musculus OX=10090 GN=Exosc10 PE=1 SV=2;tr|Q8K366|Q8K366_MOUSE Exosc10 protein OS=Mus musculus OX=10090 GN=Exosc10 PE=1 SV=1;tr|F6VYQ6|F6VYQ6_MOUSE Exosome component 10 OS=Mus musculus OX=10090 GN=Exosc10 PE	3	21	21	21	16	15	18	17	19	19	16	15	18	17	19	19	16	15	18	17	19	19	31.7	31.7	31.7	100.94	887	887;862;618	3.97	43	15	38	26	56	0	107.61	By MS/MS	By MS/MS	By MS/MS	By MS/MS	By MS/MS	By MS/MS
P50396;D6RI86;B7FAU8	P50396	21;6;5	14;3;4	14;3;4	Rab GDP dissociation inhibitor alpha	Gdi1	sp|P50396|GDIA_MOUSE Rab GDP dissociation inhibitor alpha OS=Mus musculus OX=10090 GN=Gdi1 PE=1 SV=3	3	21	14	14	15	17	17	14	16	13	8	10	11	7	9	6	8	10	11	7	9	6	66.7	51.5	51.5	50.521	447	447;78;149	3.52	33	19	8	20	24	0	118.62	By MS/MS	By MS/MS	By MS/MS	By MS/MS	By MS/MS	By MS/MS
E9PZ16;B1B0C7;Q05793;A0A571BD72	E9PZ16;B1B0C7;Q05793	21;21;17;1	21;21;17;1	21;21;17;1	Basement membrane-specific heparan sulfate proteoglycan core protein;Endorepellin;LG3 peptide	Hspg2	tr|E9PZ16|E9PZ16_MOUSE Basement membrane-specific heparan sulfate proteoglycan core protein OS=Mus musculus OX=10090 GN=Hspg2 PE=1 SV=1;tr|B1B0C7|B1B0C7_MOUSE Basement membrane-specific heparan sulfate proteoglycan core protein OS=Mus musculus OX=10090 GN=	4	21	21	21	20	15	18	13	17	15	20	15	18	13	17	15	20	15	18	13	17	15	7.4	7.4	7.4	469.78	4383	4383;4375;3707;239	4.19	25	15	10	53	31	0	97.555	By MS/MS	By MS/MS	By MS/MS	By MS/MS	By MS/MS	By MS/MS
P54071;D6RIL6;A0A0U1RP68;A0A0U1RPR1	P54071	21;10;7;3	20;9;6;3	20;9;6;3	Isocitrate dehydrogenase [NADP], mitochondrial	Idh2	sp|P54071|IDHP_MOUSE Isocitrate dehydrogenase [NADP], mitochondrial OS=Mus musculus OX=10090 GN=Idh2 PE=1 SV=3	4	21	20	20	19	18	21	17	19	18	19	17	20	16	18	17	19	17	20	16	18	17	52	52	52	50.906	452	452;294;150;90	3.46	108	25	60	59	61	0	148.6	By MS/MS	By MS/MS	By MS/MS	By MS/MS	By MS/MS	By MS/MS
Q8VCD7;I7HLQ5	Q8VCD7	21;4	21;4	19;4	Lysine-specific demethylase 4C	Kdm4c	sp|Q8VCD7|KDM4C_MOUSE Lysine-specific demethylase 4C OS=Mus musculus OX=10090 GN=Kdm4c PE=1 SV=1	2	21	21	19	12	9	13	9	14	11	12	9	13	9	14	11	11	8	13	7	13	10	24.2	24.2	23.4	119.96	1054	1054;149	3.8	12	29	23	18	14	0	88.217	By MS/MS	By MS/MS	By MS/MS	By MS/MS	By MS/MS	By MS/MS
Q922S8;Q3TTL2;A2AE72	Q922S8;Q3TTL2	21;16;1	21;16;1	19;14;1	Kinesin-like protein KIF2C;Kinesin-like protein	Kif2c	sp|Q922S8|KIF2C_MOUSE Kinesin-like protein KIF2C OS=Mus musculus OX=10090 GN=Kif2c PE=1 SV=1;tr|Q3TTL2|Q3TTL2_MOUSE Kinesin-like protein OS=Mus musculus OX=10090 GN=Kif2c PE=1 SV=1	3	21	21	19	16	15	17	15	19	16	16	15	17	15	19	16	15	14	15	13	17	14	37.7	37.7	34.1	81.084	721	721;670;57	3.56	61	16	26	34	43	0	114.81	By MS/MS	By MS/MS	By MS/MS	By MS/MS	By MS/MS	By MS/MS
Q8C3Y4;A0A0G2JFE7	Q8C3Y4	21;1	21;1	21;1	Kinetochore-associated protein 1	Kntc1	sp|Q8C3Y4|KNTC1_MOUSE Kinetochore-associated protein 1 OS=Mus musculus OX=10090 GN=Kntc1 PE=1 SV=2	2	21	21	21	12	14	13	8	10	11	12	14	13	8	10	11	12	14	13	8	10	11	10.6	10.6	10.6	250.36	2207	2207;106	3.78	17	9	33	6	18	0	44.462	By MS/MS	By MS/MS	By MS/MS	By MS/MS	By MS/MS	By MS/MS
Q8CGK3	Q8CGK3	21	21	21	Lon protease homolog, mitochondrial	Lonp1	sp|Q8CGK3|LONM_MOUSE Lon protease homolog, mitochondrial OS=Mus musculus OX=10090 GN=Lonp1 PE=1 SV=2	1	21	21	21	18	19	18	20	18	17	18	19	18	20	18	17	18	19	18	20	18	17	23.7	23.7	23.7	105.84	949	949	3.52	82	20	66	50	45	0	127.3	By MS/MS	By MS/MS	By MS/MS	By MS/MS	By MS/MS	By MS/MS
Q8R4U7;E9Q9L3	Q8R4U7	21;1	21;1	21;1	Leucine zipper protein 1	Luzp1	sp|Q8R4U7|LUZP1_MOUSE Leucine zipper protein 1 OS=Mus musculus OX=10090 GN=Luzp1 PE=1 SV=2	2	21	21	21	14	9	14	12	14	16	14	9	14	12	14	16	14	9	14	12	14	16	25.7	25.7	25.7	119.31	1068	1068;66	4.51	3	6	39	37	14	0	93.759	By MS/MS	By MS/MS	By MS/MS	By MS/MS	By MS/MS	By MS/MS
Q99KE1	Q99KE1	21	21	21	NAD-dependent malic enzyme, mitochondrial	Me2	sp|Q99KE1|MAOM_MOUSE NAD-dependent malic enzyme, mitochondrial OS=Mus musculus OX=10090 GN=Me2 PE=1 SV=1	1	21	21	21	15	14	20	16	17	16	15	14	20	16	17	16	15	14	20	16	17	16	55.2	55.2	55.2	65.798	589	589	3.68	71	3	39	27	62	0	154.78	By MS/MS	By MS/MS	By MS/MS	By MS/MS	By MS/MS	By MS/MS
Q61216;F6RX99;B2KF76;A0A1L1SQT7	Q61216	21;7;4;2	21;7;4;2	21;7;4;2	Double-strand break repair protein MRE11A	Mre11a	sp|Q61216|MRE11_MOUSE Double-strand break repair protein MRE11 OS=Mus musculus OX=10090 GN=Mre11 PE=1 SV=1	4	21	21	21	13	10	17	13	15	12	13	10	17	13	15	12	13	10	17	13	15	12	30.5	30.5	30.5	80.222	706	706;170;203;57	3.79	24	20	24	30	19	0	85.1	By MS/MS	By MS/MS	By MS/MS	By MS/MS	By MS/MS	By MS/MS
Q61941;E9Q8F4;Q8C9V5;Q8BGK0	Q61941;E9Q8F4;Q8C9V5;Q8BGK0	21;15;15;15	21;15;15;15	21;15;15;15	NAD(P) transhydrogenase, mitochondrial	Nnt	sp|Q61941|NNTM_MOUSE NAD(P) transhydrogenase, mitochondrial OS=Mus musculus OX=10090 GN=Nnt PE=1 SV=2;tr|E9Q8F4|E9Q8F4_MOUSE Proton-translocating NAD(P)(+) transhydrogenase OS=Mus musculus OX=10090 GN=Nnt PE=1 SV=1;tr|Q8C9V5|Q8C9V5_MOUSE Proton-translocati	4	21	21	21	14	13	21	9	11	10	14	13	21	9	11	10	14	13	21	9	11	10	22.9	22.9	22.9	113.84	1086	1086;713;721;835	4.11	20	10	35	12	35	0	78.651	By MS/MS	By MS/MS	By MS/MS	By MS/MS	By MS/MS	By MS/MS
Q9CZ30;B1AYJ9	Q9CZ30;B1AYJ9	21;12	21;12	20;12	Obg-like ATPase 1	Ola1	sp|Q9CZ30|OLA1_MOUSE Obg-like ATPase 1 OS=Mus musculus OX=10090 GN=Ola1 PE=1 SV=1;tr|B1AYJ9|B1AYJ9_MOUSE Obg-like ATPase 1 OS=Mus musculus OX=10090 GN=Ola1 PE=1 SV=1	2	21	21	20	17	18	18	14	18	16	17	18	18	14	18	16	16	17	17	13	17	15	55.8	55.8	53.5	44.729	396	396;281	4.05	56	33	59	66	75	0	169.69	By MS/MS	By MS/MS	By MS/MS	By MS/MS	By MS/MS	By MS/MS
B2RRE7;A0A0R4J260	B2RRE7;A0A0R4J260	21;21	21;21	21;21	OTU domain-containing protein 4	Otud4	sp|B2RRE7|OTUD4_MOUSE OTU domain-containing protein 4 OS=Mus musculus OX=10090 GN=Otud4 PE=1 SV=1;tr|A0A0R4J260|A0A0R4J260_MOUSE Ubiquitinyl hydrolase 1 OS=Mus musculus OX=10090 GN=Otud4 PE=1 SV=1	2	21	21	21	18	12	18	15	18	17	18	12	18	15	18	17	18	12	18	15	18	17	25.5	25.5	25.5	123.05	1107	1107;1106	3.6	42	21	46	34	23	0	88.013	By MS/MS	By MS/MS	By MS/MS	By MS/MS	By MS/MS	By MS/MS
Q61183;E9QAN2;E9PWC8;E9PZR3;F6VTN8;A0A0R4J244;Q9WVP6;E9QAY4;F7CXD5;A1L349;E9PVN7;F7AB38;E9Q5Z1	Q61183;E9QAN2;E9PWC8;E9PZR3;F6VTN8	21;20;18;18;12;9;8;8;8;8;5;4;3	21;20;18;18;12;9;8;8;8;8;5;4;3	19;18;16;16;12;7;6;6;8;6;4;4;3	Poly(A) polymerase alpha	Papola	sp|Q61183|PAPOA_MOUSE Poly(A) polymerase alpha OS=Mus musculus OX=10090 GN=Papola PE=1 SV=4;tr|E9QAN2|E9QAN2_MOUSE Poly(A) polymerase OS=Mus musculus OX=10090 GN=Papola PE=1 SV=1;tr|E9PWC8|E9PWC8_MOUSE Poly(A) polymerase OS=Mus musculus OX=10090 GN=Papola	13	21	21	19	14	15	20	13	13	11	14	15	20	13	13	11	13	13	18	11	11	9	34.1	34.1	31.4	82.308	739	739;732;693;718;419;293;641;168;322;642;111;120;66	3.37	50	23	39	19	27	0	102.3	By MS/MS	By MS/MS	By MS/MS	By MS/MS	By MS/MS	By MS/MS
Q9WUA3;Q8C605;F6YL81;D3YUA3	Q9WUA3;Q8C605	21;21;6;3	21;21;6;3	19;19;6;3	ATP-dependent 6-phosphofructokinase, platelet type;ATP-dependent 6-phosphofructokinase	Pfkp	sp|Q9WUA3|PFKAP_MOUSE ATP-dependent 6-phosphofructokinase, platelet type OS=Mus musculus OX=10090 GN=Pfkp PE=1 SV=1;tr|Q8C605|Q8C605_MOUSE ATP-dependent 6-phosphofructokinase OS=Mus musculus OX=10090 GN=Pfkp PE=1 SV=1	4	21	21	19	12	11	13	17	17	15	12	11	13	17	17	15	11	10	12	15	16	14	35.8	35.8	32.3	85.454	784	784;784;183;167	3.35	61	12	20	27	34	0	148.36	By MS/MS	By MS/MS	By MS/MS	By MS/MS	By MS/MS	By MS/MS
Q9DBR7;A0A1W2P750;Q8BG95;A6H644	Q9DBR7	21;10;2;2	21;10;2;2	21;10;2;2	Protein phosphatase 1 regulatory subunit 12A	Ppp1r12a	sp|Q9DBR7|MYPT1_MOUSE Protein phosphatase 1 regulatory subunit 12A OS=Mus musculus OX=10090 GN=Ppp1r12a PE=1 SV=2	4	21	21	21	17	14	19	14	18	15	17	14	19	14	18	15	17	14	19	14	18	15	26.6	26.6	26.6	114.99	1029	1029;506;976;992	3.4	65	30	53	53	20	0	137.75	By MS/MS	By MS/MS	By MS/MS	By MS/MS	By MS/MS	By MS/MS
Q3UM45;A0A087WRA7;F6TGJ2	Q3UM45	21;6;4	21;6;4	21;6;4	Protein phosphatase 1 regulatory subunit 7	Ppp1r7	sp|Q3UM45|PP1R7_MOUSE Protein phosphatase 1 regulatory subunit 7 OS=Mus musculus OX=10090 GN=Ppp1r7 PE=1 SV=2	3	21	21	21	18	19	17	19	17	18	18	19	17	19	17	18	18	19	17	19	17	18	58.7	58.7	58.7	41.291	361	361;146;109	3.75	86	7	9	43	83	0	323.31	By MS/MS	By MS/MS	By MS/MS	By MS/MS	By MS/MS	By MS/MS
Q7TNL5;Q91V89	Q7TNL5;Q91V89	21;21	21;21	14;14		Ppp2r5d	tr|Q7TNL5|Q7TNL5_MOUSE Serine/threonine-protein phosphatase 2A 56 kDa regulatory subunit OS=Mus musculus OX=10090 GN=Ppp2r5d PE=1 SV=1;tr|Q91V89|Q91V89_MOUSE Serine/threonine-protein phosphatase 2A 56 kDa regulatory subunit OS=Mus musculus OX=10090 GN=Ppp2	2	21	21	14	12	15	14	14	18	18	12	15	14	14	18	18	8	9	9	9	12	13	44.4	44.4	29.4	69.122	595	595;594	3.53	68	12	37	30	47	0	101.24	By MS/MS	By MS/MS	By MS/MS	By MS/MS	By MS/MS	By MS/MS
Q99KP6	Q99KP6	21	21	21	Pre-mRNA-processing factor 19	Prpf19	sp|Q99KP6|PRP19_MOUSE Pre-mRNA-processing factor 19 OS=Mus musculus OX=10090 GN=Prpf19 PE=1 SV=1	1	21	21	21	15	19	19	15	13	12	15	19	19	15	13	12	15	19	19	15	13	12	62.3	62.3	62.3	55.238	504	504	3.17	102	19	45	27	49	0	282.73	By MS/MS	By MS/MS	By MS/MS	By MS/MS	By MS/MS	By MS/MS
P62192	P62192	21	21	21	26S protease regulatory subunit 4	Psmc1	sp|P62192|PRS4_MOUSE 26S proteasome regulatory subunit 4 OS=Mus musculus OX=10090 GN=Psmc1 PE=1 SV=1	1	21	21	21	16	17	16	19	19	17	16	17	16	19	19	17	16	17	16	19	19	17	54.1	54.1	54.1	49.184	440	440	3.62	104	18	29	78	69	0	315.65	By MS/MS	By MS/MS	By MS/MS	By MS/MS	By MS/MS	By MS/MS
P62196;Q8K1K2	P62196;Q8K1K2	21;16	21;16	21;16	26S protease regulatory subunit 8	Psmc5	sp|P62196|PRS8_MOUSE 26S proteasome regulatory subunit 8 OS=Mus musculus OX=10090 GN=Psmc5 PE=1 SV=1;tr|Q8K1K2|Q8K1K2_MOUSE 26S proteasome regulatory subunit 8 OS=Mus musculus OX=10090 GN=Psmc5 PE=1 SV=1	2	21	21	21	19	19	18	18	19	20	19	19	18	18	19	20	19	19	18	18	19	20	55.9	55.9	55.9	45.626	406	406;348	3.27	118	60	58	68	46	0	190.42	By MS/MS	By MS/MS	By MS/MS	By MS/MS	By MS/MS	By MS/MS
Q9WUK4	Q9WUK4	21	21	21	Replication factor C subunit 2	Rfc2	sp|Q9WUK4|RFC2_MOUSE Replication factor C subunit 2 OS=Mus musculus OX=10090 GN=Rfc2 PE=1 SV=1	1	21	21	21	15	14	17	13	14	17	15	14	17	13	14	17	15	14	17	13	14	17	74.8	74.8	74.8	38.724	349	349	3.8	44	18	36	45	35	0	295.74	By MS/MS	By MS/MS	By MS/MS	By MS/MS	By MS/MS	By MS/MS
P27659;A0A2R8VHN4;A0A087WNS0;A0A087WQK0;Q9CQ09;E9PWZ3	P27659	21;9;6;6;1;1	21;9;6;6;1;1	21;9;6;6;1;1	60S ribosomal protein L3	Rpl3	sp|P27659|RL3_MOUSE 60S ribosomal protein L3 OS=Mus musculus OX=10090 GN=Rpl3 PE=1 SV=3	6	21	21	21	20	21	20	20	20	20	20	21	20	20	20	20	20	21	20	20	20	20	46.9	46.9	46.9	46.109	403	403;134;180;188;240;407	3.57	251	62	50	87	220	0	323.31	By MS/MS	By MS/MS	By MS/MS	By MS/MS	By MS/MS	By MS/MS
P25444;D3YVC1;D3YWJ3	P25444;D3YVC1;D3YWJ3	21;18;18	21;18;18	21;18;18	40S ribosomal protein S2	Rps2	sp|P25444|RS2_MOUSE 40S ribosomal protein S2 OS=Mus musculus OX=10090 GN=Rps2 PE=1 SV=3;tr|D3YVC1|D3YVC1_MOUSE 40S ribosomal protein S2 (Fragment) OS=Mus musculus OX=10090 GN=Rps2 PE=1 SV=1;tr|D3YWJ3|D3YWJ3_MOUSE 40S ribosomal protein S2 OS=Mus musculus OX	3	21	21	21	19	20	20	21	20	20	19	20	20	21	20	20	19	20	20	21	20	20	58.4	58.4	58.4	31.231	293	293;269;302	3.81	206	72	110	230	158	0	323.31	By MS/MS	By MS/MS	By MS/MS	By MS/MS	By MS/MS	By MS/MS
Q6ZWN5;F7CJS8;D3YWH9;Q9CXW7;D3Z673;D3YUV6	Q6ZWN5;F7CJS8;D3YWH9;Q9CXW7	21;18;18;18;7;4	21;18;18;18;7;4	21;18;18;18;7;4	40S ribosomal protein S9	Rps9	sp|Q6ZWN5|RS9_MOUSE 40S ribosomal protein S9 OS=Mus musculus OX=10090 GN=Rps9 PE=1 SV=3;tr|F7CJS8|F7CJS8_MOUSE 40S ribosomal protein S9 (Fragment) OS=Mus musculus OX=10090 GN=Rps9 PE=1 SV=1;tr|D3YWH9|D3YWH9_MOUSE 40S ribosomal protein S9 OS=Mus musculus OX	6	21	21	21	19	20	20	20	21	21	19	20	20	20	21	21	19	20	20	20	21	21	56.7	56.7	56.7	22.591	194	194;135;136;139;79;57	3.28	153	11	34	51	88	0	99.964	By MS/MS	By MS/MS	By MS/MS	By MS/MS	By MS/MS	By MS/MS
P60122;D3YW60	P60122	21;9	21;9	21;9	RuvB-like 1	Ruvbl1	sp|P60122|RUVB1_MOUSE RuvB-like 1 OS=Mus musculus OX=10090 GN=Ruvbl1 PE=1 SV=1	2	21	21	21	14	19	21	18	18	16	14	19	21	18	18	16	14	19	21	18	18	16	57.9	57.9	57.9	50.213	456	456;134	3.62	115	42	58	62	92	0	323.31	By MS/MS	By MS/MS	By MS/MS	By MS/MS	By MS/MS	By MS/MS
Q8C483;P26638;A2AFS0;A2AFS1	Q8C483;P26638;A2AFS0	21;20;11;7	21;20;11;7	21;20;11;7	Serine--tRNA ligase, cytoplasmic	Sars	tr|Q8C483|Q8C483_MOUSE Seryl-tRNA synthetase OS=Mus musculus OX=10090 GN=Sars PE=1 SV=1;sp|P26638|SYSC_MOUSE Serine--tRNA ligase, cytoplasmic OS=Mus musculus OX=10090 GN=Sars1 PE=1 SV=3;tr|A2AFS0|A2AFS0_MOUSE Seryl-tRNA synthetase (Fragment) OS=Mus musculu	4	21	21	21	10	13	15	19	20	18	10	13	15	19	20	18	10	13	15	19	20	18	41.4	41.4	41.4	61.166	536	536;512;352;186	3.23	88	27	44	28	43	0	160.01	By MS/MS	By MS/MS	By MS/MS	By MS/MS	By MS/MS	By MS/MS
Q8K2B3;A0A1Y7VJ55	Q8K2B3	21;7	21;7	21;7	Succinate dehydrogenase [ubiquinone] flavoprotein subunit, mitochondrial	Sdha	sp|Q8K2B3|SDHA_MOUSE Succinate dehydrogenase [ubiquinone] flavoprotein subunit, mitochondrial OS=Mus musculus OX=10090 GN=Sdha PE=1 SV=1	2	21	21	21	17	18	18	17	19	18	17	18	18	17	19	18	17	18	18	17	19	18	41.9	41.9	41.9	72.585	664	664;233	3.71	89	32	40	83	64	0	258.17	By MS/MS	By MS/MS	By MS/MS	By MS/MS	By MS/MS	By MS/MS
P50431;G3UZ26;G3UYY1;G3UZZ9	P50431;G3UZ26;G3UYY1	21;19;18;5	20;18;17;5	20;18;17;5	Serine hydroxymethyltransferase, cytosolic;Serine hydroxymethyltransferase	Shmt1	sp|P50431|GLYC_MOUSE Serine hydroxymethyltransferase, cytosolic OS=Mus musculus OX=10090 GN=Shmt1 PE=1 SV=3;tr|G3UZ26|G3UZ26_MOUSE Serine hydroxymethyltransferase (Fragment) OS=Mus musculus OX=10090 GN=Shmt1 PE=1 SV=1;tr|G3UYY1|G3UYY1_MOUSE Serine hydroxym	4	21	20	20	19	19	20	18	19	19	18	18	19	17	18	18	18	18	19	17	18	18	55.6	52.7	52.7	52.6	478	478;439;441;122	4.01	94	13	47	69	115	0	283.33	By MS/MS	By MS/MS	By MS/MS	By MS/MS	By MS/MS	By MS/MS
P51881	P51881	21	10	10	ADP/ATP translocase 2;ADP/ATP translocase 2, N-terminally processed	Slc25a5	sp|P51881|ADT2_MOUSE ADP/ATP translocase 2 OS=Mus musculus OX=10090 GN=Slc25a5 PE=1 SV=3	1	21	10	10	18	18	19	20	21	21	10	9	10	10	10	10	10	9	10	10	10	10	61.4	27.9	27.9	32.931	298	298	3.76	79	40	256	67	47	0	62.467	By MS/MS	By MS/MS	By MS/MS	By MS/MS	By MS/MS	By MS/MS
Q924W5;A0A1W2P6W0;A0A1W2P6V7;A0A1W2P6F2	Q924W5	21;2;2;1	21;2;2;1	21;2;2;1	Structural maintenance of chromosomes protein 6	Smc6	sp|Q924W5|SMC6_MOUSE Structural maintenance of chromosomes protein 6 OS=Mus musculus OX=10090 GN=Smc6 PE=1 SV=1	4	21	21	21	16	14	15	7	14	11	16	14	15	7	14	11	16	14	15	7	14	11	24.3	24.3	24.3	127.2	1097	1097;103;179;100	3.83	21	10	39	17	19	0	83.357	By MS/MS	By MS/MS	By MS/MS	By MS/MS	By MS/MS	By MS/MS
Q9CWK8	Q9CWK8	21	21	19	Sorting nexin-2	Snx2	sp|Q9CWK8|SNX2_MOUSE Sorting nexin-2 OS=Mus musculus OX=10090 GN=Snx2 PE=1 SV=2	1	21	21	19	19	20	20	17	18	18	19	20	20	17	18	18	18	18	19	17	17	17	48	48	43.9	58.47	519	519	3.66	65	7	77	58	31	0	137.03	By MS/MS	By MS/MS	By MS/MS	By MS/MS	By MS/MS	By MS/MS
F8WGW3;Q497V5;Q8CHZ0;B7ZWI4;B7ZWI7	F8WGW3;Q497V5	21;20;7;5;4	21;20;7;5;4	21;20;7;5;4	S1 RNA-binding domain-containing protein 1	Srbd1	tr|F8WGW3|F8WGW3_MOUSE S1 RNA-binding domain-containing protein 1 OS=Mus musculus OX=10090 GN=Srbd1 PE=1 SV=1;sp|Q497V5|SRBD1_MOUSE S1 RNA-binding domain-containing protein 1 OS=Mus musculus OX=10090 GN=Srbd1 PE=2 SV=3	5	21	21	21	15	17	19	13	16	16	15	17	19	13	16	16	15	17	19	13	16	16	30	30	30	110.19	981	981;982;280;195;170	4.1	38	11	28	29	56	0	132.02	By MS/MS	By MS/MS	By MS/MS	By MS/MS	By MS/MS	By MS/MS
P42227;B7ZC18	P42227;B7ZC18	21;20	21;20	21;20	Signal transducer and activator of transcription 3;Signal transducer and activator of transcription	Stat3	sp|P42227|STAT3_MOUSE Signal transducer and activator of transcription 3 OS=Mus musculus OX=10090 GN=Stat3 PE=1 SV=2;tr|B7ZC18|B7ZC18_MOUSE Signal transducer and activator of transcription OS=Mus musculus OX=10090 GN=Stat3 PE=1 SV=1	2	21	21	21	12	13	16	13	13	15	12	13	16	13	13	15	12	13	16	13	13	15	37.3	37.3	37.3	88.053	770	770;744	3.24	42	20	20	21	17	0	90.371	By MS/MS	By MS/MS	By MS/MS	By MS/MS	By MS/MS	By MS/MS
Q8C4J7;F6YAR3	Q8C4J7	21;9	21;9	21;9	Transducin beta-like protein 3	Tbl3	sp|Q8C4J7|TBL3_MOUSE Transducin beta-like protein 3 OS=Mus musculus OX=10090 GN=Tbl3 PE=2 SV=1	2	21	21	21	14	16	14	14	16	15	14	16	14	14	16	15	14	16	14	14	16	15	35.3	35.3	35.3	88.265	801	801;299	3.45	55	29	23	21	40	0	115.07	By MS/MS	By MS/MS	By MS/MS	By MS/MS	By MS/MS	By MS/MS
P10711;E9PYD5;B7ZCS4;F6XMY4;Q9QVN7	P10711;E9PYD5	21;17;1;1;1	21;17;1;1;1	21;17;1;1;1	Transcription elongation factor A protein 1	Tcea1	sp|P10711|TCEA1_MOUSE Transcription elongation factor A protein 1 OS=Mus musculus OX=10090 GN=Tcea1 PE=1 SV=2;tr|E9PYD5|E9PYD5_MOUSE Transcription elongation factor A protein 1 OS=Mus musculus OX=10090 GN=Tcea1 PE=1 SV=1	5	21	21	21	20	19	19	18	20	17	20	19	19	18	20	17	20	19	19	18	20	17	66.4	66.4	66.4	33.88	301	301;312;292;297;299	3.25	102	75	41	74	32	0	153.69	By MS/MS	By MS/MS	By MS/MS	By MS/MS	By MS/MS	By MS/MS
Q9EPQ8;A0A2R8W6K2;A0A2R8VHC6	Q9EPQ8	21;1;1	21;1;1	21;1;1	Transcription factor 20	Tcf20	sp|Q9EPQ8|TCF20_MOUSE Transcription factor 20 OS=Mus musculus OX=10090 GN=Tcf20 PE=1 SV=3	3	21	21	21	17	13	17	10	16	14	17	13	17	10	16	14	17	13	17	10	16	14	17	17	17	215.68	1987	1987;113;152	3.64	25	29	25	23	19	0	49.056	By MS/MS	By MS/MS	By MS/MS	By MS/MS	By MS/MS	By MS/MS
Q04750;Q8R4U6	Q04750	21;2	21;2	21;2	DNA topoisomerase 1	Top1	sp|Q04750|TOP1_MOUSE DNA topoisomerase 1 OS=Mus musculus OX=10090 GN=Top1 PE=1 SV=2	2	21	21	21	16	15	19	19	20	19	16	15	19	19	20	19	16	15	19	19	20	19	29.5	29.5	29.5	90.875	767	767;593	3.95	75	5	45	63	77	0	87.059	By MS/MS	By MS/MS	By MS/MS	By MS/MS	By MS/MS	By MS/MS
Q5SWD9	Q5SWD9	21	21	21	Pre-rRNA-processing protein TSR1 homolog	Tsr1	sp|Q5SWD9|TSR1_MOUSE Pre-rRNA-processing protein TSR1 homolog OS=Mus musculus OX=10090 GN=Tsr1 PE=1 SV=1	1	21	21	21	16	14	16	18	17	16	16	14	16	18	17	16	16	14	16	18	17	16	37	37	37	92.104	803	803	3.25	95	13	27	26	55	0	113.29	By MS/MS	By MS/MS	By MS/MS	By MS/MS	By MS/MS	By MS/MS
Q5NC05;F6RQ10	Q5NC05	21;2	21;2	21;2	Transcription termination factor 2	Ttf2	sp|Q5NC05|TTF2_MOUSE Transcription termination factor 2 OS=Mus musculus OX=10090 GN=Ttf2 PE=1 SV=2	2	21	21	21	15	13	16	16	16	17	15	13	16	16	16	17	15	13	16	16	16	17	25.7	25.7	25.7	125.53	1138	1138;182	4.16	22	13	16	43	28	0	77.849	By MS/MS	By MS/MS	By MS/MS	By MS/MS	By MS/MS	By MS/MS
Q922F4	Q922F4	21	8	8	Tubulin beta-6 chain	Tubb6	sp|Q922F4|TBB6_MOUSE Tubulin beta-6 chain OS=Mus musculus OX=10090 GN=Tubb6 PE=1 SV=1	1	21	8	8	16	16	16	21	18	17	3	3	3	8	5	5	3	3	3	8	5	5	68	29.5	29.5	50.09	447	447	2.83	25	11	5		12	0	70.929	By MS/MS	By MS/MS	By MS/MS	By MS/MS	By MS/MS	By MS/MS
Q6NV83;A0A087WRG2;A0A087WR93;A0A087WQT2	Q6NV83	21;10;3;1	21;10;3;1	21;10;3;1	U2 snRNP-associated SURP motif-containing protein	U2surp	sp|Q6NV83|SR140_MOUSE U2 snRNP-associated SURP motif-containing protein OS=Mus musculus OX=10090 GN=U2surp PE=1 SV=3	4	21	21	21	16	16	18	15	17	18	16	16	18	15	17	18	16	16	18	15	17	18	27.4	27.4	27.4	118.26	1029	1029;425;204;77	3.76	65	24	27	58	53	0	117.86	By MS/MS	By MS/MS	By MS/MS	By MS/MS	By MS/MS	By MS/MS
Q8VCY6	Q8VCY6	21	21	21	U3 small nucleolar RNA-associated protein 6 homolog	Utp6	sp|Q8VCY6|UTP6_MOUSE U3 small nucleolar RNA-associated protein 6 homolog OS=Mus musculus OX=10090 GN=Utp6 PE=2 SV=1	1	21	21	21	14	14	17	17	17	15	14	14	17	17	17	15	14	14	17	17	17	15	37.9	37.9	37.9	70.429	597	597	3.45	41	19	43	19	22	0	71.53	By MS/MS	By MS/MS	By MS/MS	By MS/MS	By MS/MS	By MS/MS
Q9EQH3	Q9EQH3	21	21	21	Vacuolar protein sorting-associated protein 35	Vps35	sp|Q9EQH3|VPS35_MOUSE Vacuolar protein sorting-associated protein 35 OS=Mus musculus OX=10090 GN=Vps35 PE=1 SV=1	1	21	21	21	9	19	19	19	7	8	9	19	19	19	7	8	9	19	19	19	7	8	31	31	31	91.712	796	796	3.83	47	8	42	28	46	0	172.75	By MS/MS	By MS/MS	By MS/MS	By MS/MS	By MS/MS	By MS/MS
P83741;F7CC62;F7CZC4;F6TAR7;F6U2S8;E9PZ38;F6SRP4;A0A0R4J1Z1	P83741	21;3;3;2;2;2;1;1	21;3;3;2;2;2;1;1	15;2;3;1;2;0;0;0	Serine/threonine-protein kinase WNK1	Wnk1	sp|P83741|WNK1_MOUSE Serine/threonine-protein kinase WNK1 OS=Mus musculus OX=10090 GN=Wnk1 PE=1 SV=2	8	21	21	15	14	13	12	12	18	16	14	13	12	12	18	16	12	10	10	10	12	12	10.3	10.3	7.4	250.93	2377	2377;405;407;200;281;413;708;1332	3.78	22	12	29	49	2	0	68.684	By MS/MS	By MS/MS	By MS/MS	By MS/MS	By MS/MS	By MS/MS
Q9DCD2;F6TM12	Q9DCD2	21;9	21;9	21;9	Pre-mRNA-splicing factor SYF1	Xab2	sp|Q9DCD2|SYF1_MOUSE Pre-mRNA-splicing factor SYF1 OS=Mus musculus OX=10090 GN=Xab2 PE=1 SV=1	2	21	21	21	15	10	14	14	12	10	15	10	14	14	12	10	15	10	14	14	12	10	29.4	29.4	29.4	99.986	855	855;285	4.18	20	16	22	48	26	0	73.309	By MS/MS	By MS/MS	By MS/MS	By MS/MS	By MS/MS	By MS/MS
O88532;F6QJP7;D3Z5G4;F6V459;F6RTK9	O88532	21;7;5;2;1	21;7;5;2;1	21;7;5;2;1	Zinc finger RNA-binding protein	Zfr	sp|O88532|ZFR_MOUSE Zinc finger RNA-binding protein OS=Mus musculus OX=10090 GN=Zfr PE=1 SV=2	5	21	21	21	16	16	17	17	18	16	16	16	17	17	18	16	16	16	17	17	18	16	30	30	30	116.86	1074	1074;299;351;115;44	3.24	60	39	37	47	12	0	217.19	By MS/MS	By MS/MS	By MS/MS	By MS/MS	By MS/MS	By MS/MS
Q3TJB1;A2A7T8;A2A7U0	Q3TJB1;A2A7T8	21;20;2	21;20;2	21;20;2		Zmym1	tr|Q3TJB1|Q3TJB1_MOUSE Zinc finger, MYM domain-containing 1 OS=Mus musculus OX=10090 GN=Zmym1 PE=1 SV=1;tr|A2A7T8|A2A7T8_MOUSE Zinc finger, MYM domain-containing 1 OS=Mus musculus OX=10090 GN=Zmym1 PE=1 SV=1	3	21	21	21	14	16	20	15	14	14	14	16	20	15	14	14	14	16	20	15	14	14	27.3	27.3	27.3	110.42	983	983;885;83	4.4	13	6	45	21	36	0	62.734	By MS/MS	By MS/MS	By MS/MS	By MS/MS	By MS/MS	By MS/MS
A0A0U1RP81	A0A0U1RP81	21	2	2			tr|A0A0U1RP81|A0A0U1RP81_MOUSE MICOS complex subunit MIC60 OS=Mus musculus OX=10090 GN=Immt PE=1 SV=1	1	21	2	2	20	19	20	17	20	19	2	2	2	1	2	2	2	2	2	1	2	2	49.2	5.7	5.7	53.717	488	488	2.9	6	4	10			0	22.447	By MS/MS	By MS/MS	By MS/MS	By MS/MS	By MS/MS	By MS/MS
P46664	P46664	20	20	20	Adenylosuccinate synthetase isozyme 2	Adss	sp|P46664|PURA2_MOUSE Adenylosuccinate synthetase isozyme 2 OS=Mus musculus OX=10090 GN=Adss2 PE=1 SV=2	1	20	20	20	16	14	18	18	19	18	16	14	18	18	19	18	16	14	18	18	19	18	48.7	48.7	48.7	50.02	456	456	3.62	94	21	74	40	74	0	169.63	By MS/MS	By MS/MS	By MS/MS	By MS/MS	By MS/MS	By MS/MS
Q6PAL7	Q6PAL7	20	20	20	AT-hook DNA-binding motif-containing protein 1	Ahdc1	sp|Q6PAL7|AHDC1_MOUSE AT-hook DNA-binding motif-containing protein 1 OS=Mus musculus OX=10090 GN=Ahdc1 PE=1 SV=1	1	20	20	20	15	12	18	5	12	6	15	12	18	5	12	6	15	12	18	5	12	6	18.4	18.4	18.4	168.08	1594	1594	3.77	11	29	17	27	7	0	61.431	By MS/MS	By MS/MS	By MS/MS	By MS/MS	By MS/MS	By MS/MS
Q9EQ20;A0A1Y7VJ32	Q9EQ20	20;2	20;2	20;2	Methylmalonate-semialdehyde dehydrogenase [acylating], mitochondrial	Aldh6a1	sp|Q9EQ20|MMSA_MOUSE Methylmalonate-semialdehyde dehydrogenase [acylating], mitochondrial OS=Mus musculus OX=10090 GN=Aldh6a1 PE=1 SV=1	2	20	20	20	18	16	16	5	4	6	18	16	16	5	4	6	18	16	16	5	4	6	53.1	53.1	53.1	57.915	535	535;135	3.66	32	14	9	30	22	0	121.67	By MS/MS	By MS/MS	By MS/MS	By MS/MS	By MS/MS	By MS/MS
Q5XJY5	Q5XJY5	20	20	20	Coatomer subunit delta	Arcn1	sp|Q5XJY5|COPD_MOUSE Coatomer subunit delta OS=Mus musculus OX=10090 GN=Arcn1 PE=1 SV=2	1	20	20	20	14	12	13	13	15	12	14	12	13	13	15	12	14	12	13	13	15	12	41.9	41.9	41.9	57.229	511	511	3.68	51	14	19	30	43	0	77.436	By MS/MS	By MS/MS	By MS/MS	By MS/MS	By MS/MS	By MS/MS
P62814;Q91YH6;A0A0U1RNU9	P62814	20;5;1	20;5;1	20;5;1	V-type proton ATPase subunit B, brain isoform	Atp6v1b2	sp|P62814|VATB2_MOUSE V-type proton ATPase subunit B, brain isoform OS=Mus musculus OX=10090 GN=Atp6v1b2 PE=1 SV=1	3	20	20	20	13	15	14	14	10	14	13	15	14	14	10	14	13	15	14	14	10	14	48.7	48.7	48.7	56.55	511	511;513;215	3.56	66	1	15	44	41	0	91.757	By MS/MS	By MS/MS	By MS/MS	By MS/MS	By MS/MS	By MS/MS
P28658	P28658	20	20	20	Ataxin-10	Atxn10	sp|P28658|ATX10_MOUSE Ataxin-10 OS=Mus musculus OX=10090 GN=Atxn10 PE=1 SV=2	1	20	20	20	17	20	18	18	18	16	17	20	18	18	18	16	17	20	18	18	18	16	45.1	45.1	45.1	53.706	475	475	3.39	90	37	42	22	65	0	104.68	By MS/MS	By MS/MS	By MS/MS	By MS/MS	By MS/MS	By MS/MS
O88379;G3UWZ0;G3UWK3	O88379;G3UWZ0	20;20;2	20;20;2	20;20;2	Bromodomain adjacent to zinc finger domain protein 1A	Baz1a	sp|O88379|BAZ1A_MOUSE Bromodomain adjacent to zinc finger domain protein 1A OS=Mus musculus OX=10090 GN=Baz1a PE=1 SV=3;tr|G3UWZ0|G3UWZ0_MOUSE Bromodomain adjacent to zinc finger domain protein 1A OS=Mus musculus OX=10090 GN=Baz1a PE=1 SV=1	3	20	20	20	8	6	6	11	15	14	8	6	6	11	15	14	8	6	6	11	15	14	16.6	16.6	16.6	178.46	1555	1555;1552;79	4.41		17	21	15	15	0	41.559	By MS/MS	By MS/MS	By MS/MS	By MS/MS	By MS/MS	By MS/MS
Q91VK1;A0A1Y7VKZ4;A0A1Y7VJ43;A0A1Y7VIU9;A0A1Y7VM24;A0A1Y7VM47	Q91VK1	20;8;6;5;3;3	20;8;6;5;3;3	18;7;5;4;3;3	Basic leucine zipper and W2 domain-containing protein 2	Bzw2	sp|Q91VK1|BZW2_MOUSE Basic leucine zipper and W2 domain-containing protein 2 OS=Mus musculus OX=10090 GN=Bzw2 PE=1 SV=1	6	20	20	18	13	19	18	18	15	14	13	19	18	18	15	14	11	17	16	16	13	12	40.6	40.6	37.2	48.063	419	419;200;208;177;74;113	3.51	64	11	58	46	28	0	71.678	By MS/MS	By MS/MS	By MS/MS	By MS/MS	By MS/MS	By MS/MS
A2AJK6;A0A0R4J1U9;E9PV74;A0A1Y7VIV0	A2AJK6	20;2;2;1	13;2;2;1	12;2;2;1	Chromodomain-helicase-DNA-binding protein 7	Chd7	sp|A2AJK6|CHD7_MOUSE Chromodomain-helicase-DNA-binding protein 7 OS=Mus musculus OX=10090 GN=Chd7 PE=1 SV=1	4	20	13	12	10	8	13	8	16	14	6	3	6	3	9	9	5	3	6	3	8	8	8.1	5.9	5.4	334.06	2986	2986;631;941;194	4.76	1	7	6	13	14	0	29.381	By MS/MS	By MS/MS	By MS/MS	By MS/MS	By MS/MS	By MS/MS
Q8CGZ0;G5E8I8;A0A1D5RL92	Q8CGZ0;G5E8I8;A0A1D5RL92	20;20;20	20;20;20	20;20;20	Calcium homeostasis endoplasmic reticulum protein	Cherp	sp|Q8CGZ0|CHERP_MOUSE Calcium homeostasis endoplasmic reticulum protein OS=Mus musculus OX=10090 GN=Cherp PE=1 SV=1;tr|G5E8I8|G5E8I8_MOUSE Calcium homeostasis endoplasmic reticulum protein OS=Mus musculus OX=10090 GN=Cherp PE=1 SV=2;tr|A0A1D5RL92|A0A1D5RL9	3	20	20	20	16	16	16	13	18	15	16	16	16	13	18	15	16	16	16	13	18	15	24.8	24.8	24.8	106.17	936	936;949;938	3.75	60	29	24	47	54	0	105.07	By MS/MS	By MS/MS	By MS/MS	By MS/MS	By MS/MS	By MS/MS
Q99LI7	Q99LI7	20	20	20	Cleavage stimulation factor subunit 3	Cstf3	sp|Q99LI7|CSTF3_MOUSE Cleavage stimulation factor subunit 3 OS=Mus musculus OX=10090 GN=Cstf3 PE=1 SV=1	1	20	20	20	16	18	16	17	13	14	16	18	16	17	13	14	16	18	16	17	13	14	37	37	37	82.876	717	717	3.87	48	10	35	49	41	0	112.01	By MS/MS	By MS/MS	By MS/MS	By MS/MS	By MS/MS	By MS/MS
P70698	P70698	20	20	18	CTP synthase 1	Ctps1	sp|P70698|PYRG1_MOUSE CTP synthase 1 OS=Mus musculus OX=10090 GN=Ctps1 PE=1 SV=2	1	20	20	18	12	13	15	19	16	18	12	13	15	19	16	18	11	11	13	17	15	17	40.6	40.6	36.2	66.682	591	591	3.84	52	4	23	13	61	0	66.011	By MS/MS	By MS/MS	By MS/MS	By MS/MS	By MS/MS	By MS/MS
Q9WTX6;Q3TPM3;D3Z2H3;A0A0N4SUW1	Q9WTX6;Q3TPM3	20;17;4;2	20;17;4;2	20;17;4;2	Cullin-1	Cul1	sp|Q9WTX6|CUL1_MOUSE Cullin-1 OS=Mus musculus OX=10090 GN=Cul1 PE=1 SV=1;tr|Q3TPM3|Q3TPM3_MOUSE Cullin-1 (Fragment) OS=Mus musculus OX=10090 GN=Cul1 PE=1 SV=1	4	20	20	20	14	15	18	16	16	17	14	15	18	16	16	17	14	15	18	16	16	17	26.7	26.7	26.7	89.69	776	776;699;110;51	3.78	34	24	49	15	38	0	78.457	By MS/MS	By MS/MS	By MS/MS	By MS/MS	By MS/MS	By MS/MS
Q9D4H8;E0CYT5;A0A3Q4EBZ1;H7BX52;A0A3Q4EI83	Q9D4H8;E0CYT5	20;11;3;2;1	20;11;3;2;1	20;11;3;2;1	Cullin-2	Cul2	sp|Q9D4H8|CUL2_MOUSE Cullin-2 OS=Mus musculus OX=10090 GN=Cul2 PE=1 SV=2;tr|E0CYT5|E0CYT5_MOUSE Cullin-2 (Fragment) OS=Mus musculus OX=10090 GN=Cul2 PE=1 SV=1	5	20	20	20	10	14	11	18	14	13	10	14	11	18	14	13	10	14	11	18	14	13	30.2	30.2	30.2	86.876	745	745;582;111;90;49	3.67	51	17	30	13	52	0	97.441	By MS/MS	By MS/MS	By MS/MS	By MS/MS	By MS/MS	By MS/MS
Q9CWR8;D3YUQ4	Q9CWR8	20;8	20;8	20;8	DNA (cytosine-5)-methyltransferase 3-like	Dnmt3l	sp|Q9CWR8|DNM3L_MOUSE DNA (cytosine-5)-methyltransferase 3-like OS=Mus musculus OX=10090 GN=Dnmt3l PE=1 SV=1	2	20	20	20	18	17	20	15	18	18	18	17	20	15	18	18	18	17	20	15	18	18	50.8	50.8	50.8	47.992	421	421;126	3.54	116	37	34	99	63	0	161.42	By MS/MS	By MS/MS	By MS/MS	By MS/MS	By MS/MS	By MS/MS
Q8R2M2	Q8R2M2	20	20	20	Deoxynucleotidyltransferase terminal-interacting protein 2	Dnttip2	sp|Q8R2M2|TDIF2_MOUSE Deoxynucleotidyltransferase terminal-interacting protein 2 OS=Mus musculus OX=10090 GN=Dnttip2 PE=1 SV=1	1	20	20	20	15	16	17	18	16	14	15	16	17	18	16	14	15	16	17	18	16	14	28.6	28.6	28.6	84.276	758	758	3.46	42	28	34	19	27	0	94.457	By MS/MS	By MS/MS	By MS/MS	By MS/MS	By MS/MS	By MS/MS
Q03173;A0A0A6YW06;J3QNM3;E9QKQ9;E9QLZ9;E9QKR1;A0A0A6YXC8;P70429	Q03173;A0A0A6YW06;J3QNM3;E9QKQ9;E9QLZ9;E9QKR1;A0A0A6YXC8	20;20;20;20;20;19;18;1	20;20;20;20;20;19;18;1	20;20;20;20;20;19;18;1	Protein enabled homolog	Enah	sp|Q03173|ENAH_MOUSE Protein enabled homolog OS=Mus musculus OX=10090 GN=Enah PE=1 SV=2;tr|A0A0A6YW06|A0A0A6YW06_MOUSE Protein enabled homolog OS=Mus musculus OX=10090 GN=Enah PE=1 SV=1;tr|J3QNM3|J3QNM3_MOUSE Protein enabled homolog OS=Mus musculus OX=1009	8	20	20	20	15	17	18	15	16	15	15	17	18	15	16	15	15	17	18	15	16	15	31.8	31.8	31.8	85.843	802	802;785;789;789;804;562;524;414	3.19	86	23	27	56	25	0	128.69	By MS/MS	By MS/MS	By MS/MS	By MS/MS	By MS/MS	By MS/MS
Q6DYE8;A0A1W2P763;Q91VZ7;A0A1W2P751;A0A1W2P8G4	Q6DYE8	20;5;4;2;2	20;5;4;2;2	20;5;4;2;2	Ectonucleotide pyrophosphatase/phosphodiesterase family member 3;Alkaline phosphodiesterase I;Nucleotide pyrophosphatase	Enpp3	sp|Q6DYE8|ENPP3_MOUSE Ectonucleotide pyrophosphatase/phosphodiesterase family member 3 OS=Mus musculus OX=10090 GN=Enpp3 PE=1 SV=2	5	20	20	20	16	12	20	6	7	6	16	12	20	6	7	6	16	12	20	6	7	6	32.4	32.4	32.4	98.661	874	874;281;195;64;140	3.97	48		28	27	56	0	155.86	By MS/MS	By MS/MS	By MS/MS	By MS/MS	By MS/MS	By MS/MS
B2RWS6;A0A087WPR8	B2RWS6	20;1	13;1	13;1	Histone acetyltransferase p300	Ep300	sp|B2RWS6|EP300_MOUSE Histone acetyltransferase p300 OS=Mus musculus OX=10090 GN=Ep300 PE=1 SV=2	2	20	13	13	11	12	17	11	11	10	7	6	11	6	7	6	7	6	11	6	7	6	11	7.8	7.8	263.3	2412	2412;187	3.91	5	16	13	14	6	0	33.639	By MS/MS	By MS/MS	By MS/MS	By MS/MS	By MS/MS	By MS/MS
P34914;A8JYK8	P34914;A8JYK8	20;16	20;16	20;16	Bifunctional epoxide hydrolase 2;Cytosolic epoxide hydrolase 2;Lipid-phosphate phosphatase	Ephx2	sp|P34914|HYES_MOUSE Bifunctional epoxide hydrolase 2 OS=Mus musculus OX=10090 GN=Ephx2 PE=1 SV=2;tr|A8JYK8|A8JYK8_MOUSE Bifunctional epoxide hydrolase 2 OS=Mus musculus OX=10090 GN=Ephx2 PE=1 SV=1	2	20	20	20	19	20	20	9	11	10	19	20	20	9	11	10	19	20	20	9	11	10	52	52	52	62.515	554	554;488	3.28	68	23	51	30	27	0	313.93	By MS/MS	By MS/MS	By MS/MS	By MS/MS	By MS/MS	By MS/MS
Q8K368;F7ALG5;F2Z414;D3YVC7;A0A0U1RQ89;A0A0U1RQ41	Q8K368	20;9;4;2;2;1	20;9;4;2;2;1	20;9;4;2;2;1	Fanconi anemia group I protein homolog	Fanci	sp|Q8K368|FANCI_MOUSE Fanconi anemia group I protein homolog OS=Mus musculus OX=10090 GN=Fanci PE=1 SV=2	6	20	20	20	11	14	10	11	11	7	11	14	10	11	11	7	11	14	10	11	11	7	18.3	18.3	18.3	149.32	1330	1330;850;300;73;78;111	4.12	3	34	8	4	24	0	51.642	By MS/MS	By MS/MS	By MS/MS	By MS/MS	By MS/MS	By MS/MS
P11276;A0A087WS56;Q3UHL6;A0A087WR50;B7ZNJ1;B9EHT6;A0A087WSN6;A0A087WSU6;A0A087WS99;Q4KL80;A0A087WQE0	P11276;A0A087WS56;Q3UHL6;A0A087WR50;B7ZNJ1;B9EHT6;A0A087WSN6	20;20;20;20;18;18;18;2;2;2;1	20;20;20;20;18;18;18;2;2;2;1	20;20;20;20;18;18;18;2;2;2;1	Fibronectin;Anastellin	Fn1	sp|P11276|FINC_MOUSE Fibronectin OS=Mus musculus OX=10090 GN=Fn1 PE=1 SV=4;tr|A0A087WS56|A0A087WS56_MOUSE Fibronectin OS=Mus musculus OX=10090 GN=Fn1 PE=1 SV=1;tr|Q3UHL6|Q3UHL6_MOUSE Fibronectin OS=Mus musculus OX=10090 GN=Fn1 PE=1 SV=1;tr|A0A087WR50|A0A08	11	20	20	20	10	7	17	5	6	10	10	7	17	5	6	10	10	7	17	5	6	10	12.8	12.8	12.8	272.53	2477	2477;2266;2361;2386;2176;2271;2296;67;200;383;71	4.4	5	8	26	6	22	0	76.822	By MS/MS	By MS/MS	By MS/MS	By MS/MS	By MS/MS	By MS/MS
Q8BHN3	Q8BHN3	20	20	20	Neutral alpha-glucosidase AB	Ganab	sp|Q8BHN3|GANAB_MOUSE Neutral alpha-glucosidase AB OS=Mus musculus OX=10090 GN=Ganab PE=1 SV=1	1	20	20	20	9	18	18	14	7	6	9	18	18	14	7	6	9	18	18	14	7	6	34.9	34.9	34.9	106.91	944	944	3.2	70	10	3	14	46	0	89.795	By MS/MS	By MS/MS	By MS/MS	By MS/MS	By MS/MS	By MS/MS
Q8K0D5	Q8K0D5	20	20	20	Elongation factor G, mitochondrial	Gfm1	sp|Q8K0D5|EFGM_MOUSE Elongation factor G, mitochondrial OS=Mus musculus OX=10090 GN=Gfm1 PE=1 SV=1	1	20	20	20	12	12	15	16	15	12	12	12	15	16	15	12	12	12	15	16	15	12	32	32	32	83.549	751	751	3.22	57	18	32	20	25	0	67.498	By MS/MS	By MS/MS	By MS/MS	By MS/MS	By MS/MS	By MS/MS
Q9Z2Z9	Q9Z2Z9	20	20	17	Glutamine--fructose-6-phosphate aminotransferase [isomerizing] 2	Gfpt2	sp|Q9Z2Z9|GFPT2_MOUSE Glutamine--fructose-6-phosphate aminotransferase [isomerizing] 2 OS=Mus musculus OX=10090 GN=Gfpt2 PE=1 SV=3	1	20	20	17	10	11	14	19	16	13	10	11	14	19	16	13	9	10	12	16	14	11	35.5	35.5	30.9	77.008	682	682	3.57	49	23	34	28	35	0	93.424	By MS/MS	By MS/MS	By MS/MS	By MS/MS	By MS/MS	By MS/MS
Q9DB00;E9Q507;K4DI71;A0A1D5RM47	Q9DB00;E9Q507;K4DI71	20;20;20;2	20;20;20;2	19;19;19;1	GON-4-like protein	Gon4l	sp|Q9DB00|GON4L_MOUSE GON-4-like protein OS=Mus musculus OX=10090 GN=Gon4l PE=1 SV=3;tr|E9Q507|E9Q507_MOUSE GON-4-like protein OS=Mus musculus OX=10090 GN=Gon4l PE=1 SV=1;tr|K4DI71|K4DI71_MOUSE GON-4-like protein OS=Mus musculus OX=10090 GN=Gon4l PE=1 SV=1	4	20	20	19	9	4	11	10	16	13	9	4	11	10	16	13	9	4	11	9	16	13	14.9	14.9	14.6	248.74	2260	2260;2242;2243;502	4.15	4	23	26	9	19	0	67.845	By MS/MS	By MS/MS	By MS/MS	By MS/MS	By MS/MS	By MS/MS
Q8R050	Q8R050	20	20	9	Eukaryotic peptide chain release factor GTP-binding subunit ERF3A	Gspt1	sp|Q8R050|ERF3A_MOUSE Eukaryotic peptide chain release factor GTP-binding subunit ERF3A OS=Mus musculus OX=10090 GN=Gspt1 PE=1 SV=2	1	20	20	9	18	17	17	16	18	17	18	17	17	16	18	17	9	9	8	8	9	8	42.1	42.1	27.2	68.625	636	636	3.6	113	27	46	53	91	0	157.1	By MS/MS	By MS/MS	By MS/MS	By MS/MS	By MS/MS	By MS/MS
Q6PAV2;A0A1W2P735	Q6PAV2	20;1	20;1	20;1	Probable E3 ubiquitin-protein ligase HERC4	Herc4	sp|Q6PAV2|HERC4_MOUSE Probable E3 ubiquitin-protein ligase HERC4 OS=Mus musculus OX=10090 GN=Herc4 PE=1 SV=2	2	20	20	20	15	18	20	13	16	13	15	18	20	13	16	13	15	18	20	13	16	13	33.1	33.1	33.1	118.41	1057	1057;79	3.95	60		19	52	59	0	179.46	By MS/MS	By MS/MS	By MS/MS	By MS/MS	By MS/MS	By MS/MS
Q8VDM6	Q8VDM6	20	20	20	Heterogeneous nuclear ribonucleoprotein U-like protein 1	Hnrnpul1	sp|Q8VDM6|HNRL1_MOUSE Heterogeneous nuclear ribonucleoprotein U-like protein 1 OS=Mus musculus OX=10090 GN=Hnrnpul1 PE=1 SV=1	1	20	20	20	18	14	18	10	11	13	18	14	18	10	11	13	18	14	18	10	11	13	30.7	30.7	30.7	96.001	859	859	3.27	49	38	25	19	26	0	133.05	By MS/MS	By MS/MS	By MS/MS	By MS/MS	By MS/MS	By MS/MS
P16125;A0A6I8MX27;D3Z7F0;A0A0N4SVV8	P16125;A0A6I8MX27;D3Z7F0	20;20;12;7	18;18;10;5	18;18;10;5	L-lactate dehydrogenase B chain;L-lactate dehydrogenase	Ldhb	sp|P16125|LDHB_MOUSE L-lactate dehydrogenase B chain OS=Mus musculus OX=10090 GN=Ldhb PE=1 SV=2;tr|A0A6I8MX27|A0A6I8MX27_MOUSE L-lactate dehydrogenase B chain OS=Mus musculus OX=10090 GN=Ldhb PE=4 SV=1;tr|D3Z7F0|D3Z7F0_MOUSE L-lactate dehydrogenase (Fragme	4	20	18	18	18	18	19	18	17	17	17	16	17	16	15	15	17	16	17	16	15	15	58.7	56.9	56.9	36.572	334	334;341;198;193	3.67	115	46	78	67	95	0	243.81	By MS/MS	By MS/MS	By MS/MS	By MS/MS	By MS/MS	By MS/MS
P48678;D3YUF7	P48678	20;4	20;4	20;4	Prelamin-A/C;Lamin-A/C	Lmna	sp|P48678|LMNA_MOUSE Prelamin-A/C OS=Mus musculus OX=10090 GN=Lmna PE=1 SV=2	2	20	20	20	16	14	13	11	16	13	16	14	13	11	16	13	16	14	13	11	16	13	39.2	39.2	39.2	74.237	665	665;117	3.84	23	13	41	45	8	0	77.079	By MS/MS	By MS/MS	By MS/MS	By MS/MS	By MS/MS	By MS/MS
Q9CRC8;A0A0R4J0W6;F6RDA7;D6RHB1;F6RGS7;D6RFC5;A0A0G2JGC9	Q9CRC8;A0A0R4J0W6	20;20;3;3;2;1;1	20;20;3;3;2;1;1	20;20;3;3;2;1;1	Leucine-rich repeat-containing protein 40	Lrrc40	sp|Q9CRC8|LRC40_MOUSE Leucine-rich repeat-containing protein 40 OS=Mus musculus OX=10090 GN=Lrrc40 PE=1 SV=2;tr|A0A0R4J0W6|A0A0R4J0W6_MOUSE Leucine-rich repeat-containing protein 40 OS=Mus musculus OX=10090 GN=Lrrc40 PE=1 SV=1	7	20	20	20	14	16	17	16	16	15	14	16	17	16	16	15	14	16	17	16	16	15	38.9	38.9	38.9	68.075	602	602;602;114;131;68;54;54	3.84	42	6	34	35	36	0	73.146	By MS/MS	By MS/MS	By MS/MS	By MS/MS	By MS/MS	By MS/MS
P63085;A0A338P736;A0A338P781;Q61532;Q6P5G0;E9PXX5;E9Q3I6	P63085	20;6;4;1;1;1;1	20;6;4;1;1;1;1	15;6;4;0;0;0;0	Mitogen-activated protein kinase 1	Mapk1	sp|P63085|MK01_MOUSE Mitogen-activated protein kinase 1 OS=Mus musculus OX=10090 GN=Mapk1 PE=1 SV=3	7	20	20	15	17	16	19	16	15	16	17	16	19	16	15	16	13	12	15	13	12	13	64.8	64.8	51.1	41.275	358	358;134;108;720;583;193;233	3.3	96	26	59	36	47	0	238.61	By MS/MS	By MS/MS	By MS/MS	By MS/MS	By MS/MS	By MS/MS
Q61166	Q61166	20	20	17	Microtubule-associated protein RP/EB family member 1	Mapre1	sp|Q61166|MARE1_MOUSE Microtubule-associated protein RP/EB family member 1 OS=Mus musculus OX=10090 GN=Mapre1 PE=1 SV=3	1	20	20	17	17	14	17	18	18	18	17	14	17	18	18	18	14	11	14	15	15	16	68.3	68.3	61.6	30.016	268	268	3.33	67	54	31	14	49	0	323.31	By MS/MS	By MS/MS	By MS/MS	By MS/MS	By MS/MS	By MS/MS
P08249;A0A0G2JF23;A0A0G2JGY4	P08249	20;9;4	20;9;4	20;9;4	Malate dehydrogenase, mitochondrial	Mdh2	sp|P08249|MDHM_MOUSE Malate dehydrogenase, mitochondrial OS=Mus musculus OX=10090 GN=Mdh2 PE=1 SV=3	3	20	20	20	17	20	19	18	18	18	17	20	19	18	18	18	17	20	19	18	18	18	64.5	64.5	64.5	35.611	338	338;199;153	3.66	143	53	81	87	115	0	323.31	By MS/MS	By MS/MS	By MS/MS	By MS/MS	By MS/MS	By MS/MS
Q9EQQ9;A0A494B913	Q9EQQ9	20;5	20;5	20;5	Protein O-GlcNAcase	Mgea5	sp|Q9EQQ9|OGA_MOUSE Protein O-GlcNAcase OS=Mus musculus OX=10090 GN=Oga PE=1 SV=2	2	20	20	20	12	13	15	15	17	17	12	13	15	15	17	17	12	13	15	15	17	17	30.5	30.5	30.5	103.16	916	916;182	3.57	45	17	27	18	36	0	70.713	By MS/MS	By MS/MS	By MS/MS	By MS/MS	By MS/MS	By MS/MS
Q3UHU5;H3BL83;B8JJI7;A2ACV6;E1U8D0	Q3UHU5;H3BL83;B8JJI7	20;17;16;1;1	20;17;16;1;1	19;16;15;0;0	Microtubule cross-linking factor 1	Mtcl1	sp|Q3UHU5|MTCL1_MOUSE Microtubule cross-linking factor 1 OS=Mus musculus OX=10090 GN=Mtcl1 PE=1 SV=1;tr|H3BL83|H3BL83_MOUSE Microtubule cross-linking factor 1 OS=Mus musculus OX=10090 GN=Mtcl1 PE=1 SV=1;tr|B8JJI7|B8JJI7_MOUSE Microtubule cross-linking fact	5	20	20	19	17	3	14	5	10	11	17	3	14	5	10	11	17	3	13	5	10	10	14.2	14.2	13.8	213.86	1945	1945;1590;1496;1654;1418	4.56	3	15	8	26	19	0	54.028	By MS/MS	By MS/MS	By MS/MS	By MS/MS	By MS/MS	By MS/MS
P46735;E9QNH6;E9Q580;Q7TQD7;D3YV80	P46735;E9QNH6;E9Q580;Q7TQD7	20;20;20;20;7	20;20;20;20;7	17;17;17;17;4	Unconventional myosin-Ib	Myo1b	sp|P46735|MYO1B_MOUSE Unconventional myosin-Ib OS=Mus musculus OX=10090 GN=Myo1b PE=1 SV=3;tr|E9QNH6|E9QNH6_MOUSE Unconventional myosin-Ib OS=Mus musculus OX=10090 GN=Myo1b PE=1 SV=1;tr|E9Q580|E9Q580_MOUSE Unconventional myosin-Ib OS=Mus musculus OX=10090	5	20	20	17	16	15	18	14	11	11	16	15	18	14	11	11	13	12	15	11	9	9	23.8	23.8	20	128.56	1107	1107;1078;1084;1136;299	4.08	31	7	25	37	37	0	111.78	By MS/MS	By MS/MS	By MS/MS	By MS/MS	By MS/MS	By MS/MS
Q9JIH2	Q9JIH2	20	20	20	Nuclear pore complex protein Nup50	Nup50	sp|Q9JIH2|NUP50_MOUSE Nuclear pore complex protein Nup50 OS=Mus musculus OX=10090 GN=Nup50 PE=1 SV=3	1	20	20	20	15	15	19	16	19	17	15	15	19	16	19	17	15	15	19	16	19	17	61.2	61.2	61.2	49.485	466	466	3.43	81	14	28	31	54	0	241.82	By MS/MS	By MS/MS	By MS/MS	By MS/MS	By MS/MS	By MS/MS
Q8CIN4;A3KGC3;A3KGC4;A3KGC5	Q8CIN4	20;3;3;3	20;3;3;3	14;0;0;0	Serine/threonine-protein kinase PAK 2;PAK-2p27;PAK-2p34	Pak2	sp|Q8CIN4|PAK2_MOUSE Serine/threonine-protein kinase PAK 2 OS=Mus musculus OX=10090 GN=Pak2 PE=1 SV=1	4	20	20	14	19	19	17	19	19	19	19	19	17	19	19	19	13	13	11	13	13	13	49.6	49.6	37.6	57.93	524	524;155;195;366	3.34	82	32	45	38	41	0	189.02	By MS/MS	By MS/MS	By MS/MS	By MS/MS	By MS/MS	By MS/MS
Q9EQ61;Q5SQ20	Q9EQ61;Q5SQ20	20;20	20;20	20;20	Pescadillo homolog	Pes1	sp|Q9EQ61|PESC_MOUSE Pescadillo homolog OS=Mus musculus OX=10090 GN=Pes1 PE=1 SV=1;tr|Q5SQ20|Q5SQ20_MOUSE Pescadillo homolog OS=Mus musculus OX=10090 GN=Pes1 PE=1 SV=1	2	20	20	20	12	16	16	14	16	14	12	16	16	14	16	14	12	16	16	14	16	14	36.1	36.1	36.1	67.795	584	584;588	3.3	83	12	28	9	59	0	138.59	By MS/MS	By MS/MS	By MS/MS	By MS/MS	By MS/MS	By MS/MS
P67778;Q5SQG5	P67778;Q5SQG5	20;14	20;14	20;14	Prohibitin	Phb	sp|P67778|PHB_MOUSE Prohibitin OS=Mus musculus OX=10090 GN=Phb PE=1 SV=1;tr|Q5SQG5|Q5SQG5_MOUSE Prohibitin (Fragment) OS=Mus musculus OX=10090 GN=Phb PE=1 SV=1	2	20	20	20	16	17	19	16	17	17	16	17	19	16	17	17	16	17	19	16	17	17	71.7	71.7	71.7	29.82	272	272;207	3.48	115	50	51	53	80	0	147.65	By MS/MS	By MS/MS	By MS/MS	By MS/MS	By MS/MS	By MS/MS
Q9WVF7;E9QAP5;E9QAP6	Q9WVF7	20;5;3	20;5;3	20;5;3	DNA polymerase epsilon catalytic subunit A	Pole	sp|Q9WVF7|DPOE1_MOUSE DNA polymerase epsilon catalytic subunit A OS=Mus musculus OX=10090 GN=Pole PE=1 SV=3	3	20	20	20	13	13	12	8	13	11	13	13	12	8	13	11	13	13	12	8	13	11	12.9	12.9	12.9	262.1	2283	2283;193;407	4.15	21	8	15	20	33	0	68.706	By MS/MS	By MS/MS	By MS/MS	By MS/MS	By MS/MS	By MS/MS
Q8CIH9	Q8CIH9	20	20	20	Amidophosphoribosyltransferase	Ppat	tr|Q8CIH9|Q8CIH9_MOUSE Amidophosphoribosyltransferase OS=Mus musculus OX=10090 GN=Ppat PE=1 SV=1	1	20	20	20	14	16	16	16	12	12	14	16	16	16	12	12	14	16	16	16	12	12	44.1	44.1	44.1	57.402	517	517	3.45	82	22	12	21	67	0	150.4	By MS/MS	By MS/MS	By MS/MS	By MS/MS	By MS/MS	By MS/MS
Q9WVJ2;E9Q5I9;E9Q0U1;F6ZQQ3;F6PXS6;E9PY93	Q9WVJ2;E9Q5I9;E9Q0U1	20;17;10;9;4;1	20;17;10;9;4;1	20;17;10;9;4;1	26S proteasome non-ATPase regulatory subunit 13	Psmd13	sp|Q9WVJ2|PSD13_MOUSE 26S proteasome non-ATPase regulatory subunit 13 OS=Mus musculus OX=10090 GN=Psmd13 PE=1 SV=1;tr|E9Q5I9|E9Q5I9_MOUSE 26S proteasome non-ATPase regulatory subunit 13 OS=Mus musculus OX=10090 GN=Psmd13 PE=1 SV=1;tr|E9Q0U1|E9Q0U1_MOUSE 26	6	20	20	20	14	19	18	19	15	13	14	19	18	19	15	13	14	19	18	19	15	13	60.9	60.9	60.9	42.809	376	376;349;241;206;96;72	3.64	75	21	57	47	54	0	104.06	By MS/MS	By MS/MS	By MS/MS	By MS/MS	By MS/MS	By MS/MS
Q60972	Q60972	20	20	13	Histone-binding protein RBBP4	Rbbp4	sp|Q60972|RBBP4_MOUSE Histone-binding protein RBBP4 OS=Mus musculus OX=10090 GN=Rbbp4 PE=1 SV=5	1	20	20	13	15	17	16	18	16	13	15	17	16	18	16	13	11	11	11	12	10	8	70.6	70.6	62.8	47.655	425	425	3.62	117	24	39	72	87	0	323.31	By MS/MS	By MS/MS	By MS/MS	By MS/MS	By MS/MS	By MS/MS
Q60973;A2AFI9;A2AFJ1;F6ZLC6;F6U539	Q60973;A2AFI9;A2AFJ1	20;19;19;9;3	13;12;12;7;1	13;12;12;7;1	Histone-binding protein RBBP7	Rbbp7	sp|Q60973|RBBP7_MOUSE Histone-binding protein RBBP7 OS=Mus musculus OX=10090 GN=Rbbp7 PE=1 SV=1;tr|A2AFI9|A2AFI9_MOUSE Histone-binding protein RBBP7 OS=Mus musculus OX=10090 GN=Rbbp7 PE=1 SV=1;tr|A2AFJ1|A2AFJ1_MOUSE Histone-binding protein RBBP7 OS=Mus mus	5	20	13	13	12	17	18	16	17	14	8	11	13	10	11	9	8	11	13	10	11	9	70.4	60.9	60.9	47.789	425	425;386;416;235;76	3.46	77	18	38	41	45	0	181.5	By MS/MS	By MS/MS	By MS/MS	By MS/MS	By MS/MS	By MS/MS
Q6NXI6;A0A0G2JFW6;A0A0G2JFN1	Q6NXI6;A0A0G2JFW6;A0A0G2JFN1	20;19;10	20;19;10	20;19;10	Regulation of nuclear pre-mRNA domain-containing protein 2	Rprd2	sp|Q6NXI6|RPRD2_MOUSE Regulation of nuclear pre-mRNA domain-containing protein 2 OS=Mus musculus OX=10090 GN=Rprd2 PE=1 SV=1;tr|A0A0G2JFW6|A0A0G2JFW6_MOUSE Regulation of nuclear pre-mRNA domain-containing protein 2 (Fragment) OS=Mus musculus OX=10090 GN=Rp	3	20	20	20	16	13	16	11	14	13	16	13	16	11	14	13	16	13	16	11	14	13	24.4	24.4	24.4	156.58	1469	1469;1386;473	4.15	22	10	19	27	33	0	115.7	By MS/MS	By MS/MS	By MS/MS	By MS/MS	By MS/MS	By MS/MS
Q8BVY0;A0A2R8VHW2	Q8BVY0	20;7	20;7	20;7	Ribosomal L1 domain-containing protein 1	Rsl1d1	sp|Q8BVY0|RL1D1_MOUSE Ribosomal L1 domain-containing protein 1 OS=Mus musculus OX=10090 GN=Rsl1d1 PE=1 SV=1	2	20	20	20	18	18	19	19	18	18	18	18	19	19	18	18	18	18	19	19	18	18	54.6	54.6	54.6	50.421	452	452;238	3.35	148	67	41	31	111	0	323.31	By MS/MS	By MS/MS	By MS/MS	By MS/MS	By MS/MS	By MS/MS
A2ADB1;A2ADB0	A2ADB1;A2ADB0	20;20	20;20	2;2		Spen	tr|A2ADB1|A2ADB1_MOUSE Msx2-interacting protein OS=Mus musculus OX=10090 GN=Spen PE=1 SV=1;tr|A2ADB0|A2ADB0_MOUSE Msx2-interacting protein OS=Mus musculus OX=10090 GN=Spen PE=1 SV=1	2	20	20	2	15	9	15	9	7	12	15	9	15	9	7	12	2	0	2	1	1	2	10	10	0.8	395.98	3620	3620;3643	4.49	3	6	28	30	12	0	72.529	By MS/MS	By MS/MS	By MS/MS	By MS/MS	By MS/MS	By MS/MS
P32067;A2AR07;D6RI87;F6SXM5	P32067;A2AR07;D6RI87	20;14;10;4	20;14;10;4	20;14;10;4	Lupus La protein homolog	Ssb	sp|P32067|LA_MOUSE Lupus La protein homolog OS=Mus musculus OX=10090 GN=Ssb PE=1 SV=1;tr|A2AR07|A2AR07_MOUSE Lupus La protein homolog (Fragment) OS=Mus musculus OX=10090 GN=Ssb PE=1 SV=1;tr|D6RI87|D6RI87_MOUSE Lupus La protein homolog OS=Mus musculus OX=10	4	20	20	20	17	18	18	20	16	14	17	18	18	20	16	14	17	18	18	20	16	14	38.6	38.6	38.6	47.756	415	415;184;159;230	3.7	121	29	58	72	102	0	165.67	By MS/MS	By MS/MS	By MS/MS	By MS/MS	By MS/MS	By MS/MS
Q93092;A0A1B0GR11	Q93092;A0A1B0GR11	20;20	20;20	20;20	Transaldolase	Taldo1	sp|Q93092|TALDO_MOUSE Transaldolase OS=Mus musculus OX=10090 GN=Taldo1 PE=1 SV=2;tr|A0A1B0GR11|A0A1B0GR11_MOUSE Transaldolase OS=Mus musculus OX=10090 GN=Taldo1 PE=1 SV=1	2	20	20	20	14	18	16	18	20	18	14	18	16	18	20	18	14	18	16	18	20	18	45.7	45.7	45.7	37.387	337	337;382	3.59	98	30	33	52	77	0	87.689	By MS/MS	By MS/MS	By MS/MS	By MS/MS	By MS/MS	By MS/MS
Q9CXF4	Q9CXF4	20	20	20	TBC1 domain family member 15	Tbc1d15	sp|Q9CXF4|TBC15_MOUSE TBC1 domain family member 15 OS=Mus musculus OX=10090 GN=Tbc1d15 PE=1 SV=1	1	20	20	20	16	18	17	12	18	16	16	18	17	12	18	16	16	18	17	12	18	16	35	35	35	76.526	671	671	3.52	59	33	39	21	47	0	163.98	By MS/MS	By MS/MS	By MS/MS	By MS/MS	By MS/MS	By MS/MS
Q9R1X4;H7BX89;E9Q302	Q9R1X4	20;7;1	20;7;1	20;7;1	Protein timeless homolog	Timeless	sp|Q9R1X4|TIM_MOUSE Protein timeless homolog OS=Mus musculus OX=10090 GN=Timeless PE=1 SV=3	3	20	20	20	12	16	18	14	14	13	12	16	18	14	14	13	12	16	18	14	14	13	22.4	22.4	22.4	137.5	1197	1197;534;122	4.09	45	4	21	34	60	0	161.39	By MS/MS	By MS/MS	By MS/MS	By MS/MS	By MS/MS	By MS/MS
Q1PSW8	Q1PSW8	20	20	20	E3 ubiquitin-protein ligase TRIM71	Trim71	sp|Q1PSW8|LIN41_MOUSE E3 ubiquitin-protein ligase TRIM71 OS=Mus musculus OX=10090 GN=Trim71 PE=1 SV=1	1	20	20	20	15	13	18	12	15	15	15	13	18	12	15	15	15	13	18	12	15	15	34.6	34.6	34.6	92.053	855	855	3.63	47	11	28	31	33	0	89.542	By MS/MS	By MS/MS	By MS/MS	By MS/MS	By MS/MS	By MS/MS
Q3TPW2	Q3TPW2	20	20	1		Ttk	tr|Q3TPW2|Q3TPW2_MOUSE Dual-specificity protein kinase TTK OS=Mus musculus OX=10090 GN=Ttk PE=1 SV=1	1	20	20	1	12	11	20	16	16	13	12	11	20	16	16	13	1	1	1	1	1	1	39.2	39.2	1.7	86.986	773	773	3.99	19	26	30	38	22	0	243.07	By MS/MS	By MS/MS	By MS/MS	By MS/MS	By MS/MS	By MS/MS
P52479;G3X9U6	P52479	20;4	20;4	20;4	Ubiquitin carboxyl-terminal hydrolase 10	Usp10	sp|P52479|UBP10_MOUSE Ubiquitin carboxyl-terminal hydrolase 10 OS=Mus musculus OX=10090 GN=Usp10 PE=1 SV=3	2	20	20	20	14	12	15	13	19	15	14	12	15	13	19	15	14	12	15	13	19	15	41	41	41	87.021	792	792;114	3.21	59	35	25	18	31	0	133.43	By MS/MS	By MS/MS	By MS/MS	By MS/MS	By MS/MS	By MS/MS
Q9JMA1;E9PYI8	Q9JMA1;E9PYI8	20;19	20;19	20;19	Ubiquitin carboxyl-terminal hydrolase 14;Ubiquitin carboxyl-terminal hydrolase	Usp14	sp|Q9JMA1|UBP14_MOUSE Ubiquitin carboxyl-terminal hydrolase 14 OS=Mus musculus OX=10090 GN=Usp14 PE=1 SV=3;tr|E9PYI8|E9PYI8_MOUSE Ubiquitin carboxyl-terminal hydrolase OS=Mus musculus OX=10090 GN=Usp14 PE=1 SV=1	2	20	20	20	18	16	18	20	18	18	18	16	18	20	18	18	18	16	18	20	18	18	52.9	52.9	52.9	56.001	493	493;458	3.28	112	24	76	40	51	0	323.31	By MS/MS	By MS/MS	By MS/MS	By MS/MS	By MS/MS	By MS/MS
Q80U87;A2AI52	Q80U87;A2AI52	20;20	20;20	20;20	Ubiquitin carboxyl-terminal hydrolase 8;Ubiquitin carboxyl-terminal hydrolase	Usp8	sp|Q80U87|UBP8_MOUSE Ubiquitin carboxyl-terminal hydrolase 8 OS=Mus musculus OX=10090 GN=Usp8 PE=1 SV=2;tr|A2AI52|A2AI52_MOUSE Ubiquitin carboxyl-terminal hydrolase 8 OS=Mus musculus OX=10090 GN=Usp8 PE=1 SV=1	2	20	20	20	13	11	17	12	9	10	13	11	17	12	9	10	13	11	17	12	9	10	23.1	23.1	23.1	122.61	1080	1080;1091	3.92	18	12	28	32	13	0	45.306	By MS/MS	By MS/MS	By MS/MS	By MS/MS	By MS/MS	By MS/MS
S4R2I9;Q6NXK2;S4R1H5;A0A494BBA0;S4R2M5;S4R2T9;S4R2D8;A0A494BAA7;A0A494BA12	S4R2I9;Q6NXK2;S4R1H5	20;14;13;2;2;2;2;2;1	20;14;13;2;2;2;2;2;1	19;14;13;2;2;2;2;2;1	Zinc finger protein 532	Zfp532;Znf532	tr|S4R2I9|S4R2I9_MOUSE Zinc finger protein 532 OS=Mus musculus OX=10090 GN=Zfp532 PE=1 SV=1;sp|Q6NXK2|ZN532_MOUSE Zinc finger protein 532 OS=Mus musculus OX=10090 GN=Znf532 PE=1 SV=1;tr|S4R1H5|S4R1H5_MOUSE Zinc finger protein 532 (Fragment) OS=Mus musculus	9	20	20	19	19	13	18	10	13	15	19	13	18	10	13	15	18	13	18	9	12	15	22.3	22.3	21.6	141.38	1304	1304;1036;779;160;170;174;219;230;75	3.97	22	27	15	19	35	0	103.79	By MS/MS	By MS/MS	By MS/MS	By MS/MS	By MS/MS	By MS/MS
P68134;P68033;P62737;P63268;D3Z2K3;A0A494B9T3;D3YZY0;A0A1D5RM20;A0A0U1RQ96	P68134;P68033;P62737;P63268;D3Z2K3;A0A494B9T3;D3YZY0;A0A1D5RM20	19;19;18;17;11;11;11;10;6	4;4;4;3;2;2;2;2;2	4;4;4;3;2;2;2;2;2	Actin, alpha skeletal muscle;Actin, alpha cardiac muscle 1;Actin, aortic smooth muscle;Actin, gamma-enteric smooth muscle	Acta1;Actc1;Acta2;Actg2	sp|P68134|ACTS_MOUSE Actin, alpha skeletal muscle OS=Mus musculus OX=10090 GN=Acta1 PE=1 SV=1;sp|P68033|ACTC_MOUSE Actin, alpha cardiac muscle 1 OS=Mus musculus OX=10090 GN=Actc1 PE=1 SV=1;sp|P62737|ACTA_MOUSE Actin, aortic smooth muscle OS=Mus musculus OX	9	19	4	4	14	16	17	15	17	13	1	1	3	2	2	1	1	1	3	2	2	1	48.5	18.8	18.8	42.051	377	377;377;377;376;195;214;221;151;195	4.52	67	2	13	105	131	0	71.083	By MS/MS	By MS/MS	By MS/MS	By MS/MS	By MS/MS	By MS/MS
P97384;D3Z7U0	P97384;D3Z7U0	19;12	19;12	19;12	Annexin A11;Annexin	Anxa11	sp|P97384|ANX11_MOUSE Annexin A11 OS=Mus musculus OX=10090 GN=Anxa11 PE=1 SV=2;tr|D3Z7U0|D3Z7U0_MOUSE Annexin OS=Mus musculus OX=10090 GN=Anxa11 PE=1 SV=1	2	19	19	19	14	18	18	13	13	10	14	18	18	13	13	10	14	18	18	13	13	10	41.2	41.2	41.2	54.079	503	503;447	3.78	57	8	22	31	55	0	127.2	By MS/MS	By MS/MS	By MS/MS	By MS/MS	By MS/MS	By MS/MS
Q91X20;E9PU93;D3YYA0;D6RI55;D6RET1	Q91X20;E9PU93;D3YYA0	19;19;15;7;6	19;19;15;7;6	19;19;15;7;6	Set1/Ash2 histone methyltransferase complex subunit ASH2	Ash2l	sp|Q91X20|ASH2L_MOUSE Set1/Ash2 histone methyltransferase complex subunit ASH2 OS=Mus musculus OX=10090 GN=Ash2l PE=1 SV=1;tr|E9PU93|E9PU93_MOUSE Set1/Ash2 histone methyltransferase complex subunit ASH2 OS=Mus musculus OX=10090 GN=Ash2l PE=1 SV=1;tr|D3YYA0	5	19	19	19	15	18	17	15	17	17	15	18	17	15	17	17	15	18	17	15	17	17	37.2	37.2	37.2	68.249	623	623;534;501;346;352	3.75	85	2	54	57	67	0	289.26	By MS/MS	By MS/MS	By MS/MS	By MS/MS	By MS/MS	By MS/MS
Q7TT18;A0A087WR75;A0A087WR39;A0A0N4SVP5;A0A087WQB3;A0A0N4SVA8;A0A087WNQ2;A0A087WPT6	Q7TT18;A0A087WR75	19;16;8;7;3;2;2;1	19;16;8;7;3;2;2;1	19;16;8;7;3;2;2;1	Activating transcription factor 7-interacting protein 1	Atf7ip	sp|Q7TT18|MCAF1_MOUSE Activating transcription factor 7-interacting protein 1 OS=Mus musculus OX=10090 GN=Atf7ip PE=1 SV=1;tr|A0A087WR75|A0A087WR75_MOUSE Activating transcription factor 7-interacting protein 1 (Fragment) OS=Mus musculus OX=10090 GN=Atf7ip	8	19	19	19	13	10	14	13	17	14	13	10	14	13	17	14	13	10	14	13	17	14	26.7	26.7	26.7	138.59	1306	1306;969;559;345;157;73;107;46	3.39	35	39	30	21	18	0	81.53	By MS/MS	By MS/MS	By MS/MS	By MS/MS	By MS/MS	By MS/MS
Q9EPE9;A0A571BD32	Q9EPE9	19;2	19;2	19;2	Manganese-transporting ATPase 13A1	Atp13a1	sp|Q9EPE9|AT131_MOUSE Manganese-transporting ATPase 13A1 OS=Mus musculus OX=10090 GN=Atp13a1 PE=1 SV=2	2	19	19	19	14	10	19	11	10	12	14	10	19	11	10	12	14	10	19	11	10	12	21	21	21	132.39	1200	1200;69	4.28	19	1	49	24	35	0	72.035	By MS/MS	By MS/MS	By MS/MS	By MS/MS	By MS/MS	By MS/MS
G5E829;A0A1W2P7C7;Q9R0K7;Q3UHH0;F8WHB1;A0A1W2P867;A0A1W2P7R3;S4R1C4;A0A1W2P772	G5E829	19;8;4;4;4;3;3;3;2	19;8;4;4;4;3;3;3;2	12;5;1;1;1;2;3;0;2	Plasma membrane calcium-transporting ATPase 1	Atp2b1	sp|G5E829|AT2B1_MOUSE Plasma membrane calcium-transporting ATPase 1 OS=Mus musculus OX=10090 GN=Atp2b1 PE=1 SV=1	9	19	19	12	13	15	16	12	13	10	13	15	16	12	13	10	7	9	10	8	6	6	22.1	22.1	14.3	134.75	1220	1220;430;1198;1194;1243;175;212;1154;317	3.5	26	20	42	8	17	0	60.318	By MS/MS	By MS/MS	By MS/MS	By MS/MS	By MS/MS	By MS/MS
Q9Z1S0	Q9Z1S0	19	19	19	Mitotic checkpoint serine/threonine-protein kinase BUB1 beta	Bub1b	sp|Q9Z1S0|BUB1B_MOUSE Mitotic checkpoint serine/threonine-protein kinase BUB1 beta OS=Mus musculus OX=10090 GN=Bub1b PE=1 SV=2	1	19	19	19	17	7	16	11	15	14	17	7	16	11	15	14	17	7	16	11	15	14	25.5	25.5	25.5	118.39	1052	1052	4.01	19	29	21	17	35	0	103.83	By MS/MS	By MS/MS	By MS/MS	By MS/MS	By MS/MS	By MS/MS
Q9CQC6;A0A087WQS2;A0A087WPF9;A0A087WS48	Q9CQC6;A0A087WQS2;A0A087WPF9	19;19;12;1	17;17;11;1	17;17;11;1	Basic leucine zipper and W2 domain-containing protein 1	Bzw1	sp|Q9CQC6|BZW1_MOUSE Basic leucine zipper and W2 domain-containing protein 1 OS=Mus musculus OX=10090 GN=Bzw1 PE=1 SV=1;tr|A0A087WQS2|A0A087WQS2_MOUSE Basic leucine zipper and W2 domain-containing protein 1 OS=Mus musculus OX=10090 GN=Bzw1 PE=1 SV=1;tr|A0A	4	19	17	17	16	18	17	16	16	16	14	16	15	14	14	14	14	16	15	14	14	14	40.1	36.8	36.8	48.043	419	419;451;253;105	3.69	86	17	54	62	63	0	116.66	By MS/MS	By MS/MS	By MS/MS	By MS/MS	By MS/MS	By MS/MS
Q9CXW3;A0A0A6YY29	Q9CXW3	19;7	19;7	19;7	Calcyclin-binding protein	Cacybp	sp|Q9CXW3|CYBP_MOUSE Calcyclin-binding protein OS=Mus musculus OX=10090 GN=Cacybp PE=1 SV=1	2	19	19	19	12	16	17	19	17	18	12	16	17	19	17	18	12	16	17	19	17	18	64.6	64.6	64.6	26.51	229	229;135	3.56	114	37	77	89	61	0	323.31	By MS/MS	By MS/MS	By MS/MS	By MS/MS	By MS/MS	By MS/MS
Q80VC9	Q80VC9	19	19	19	Calmodulin-regulated spectrin-associated protein 3	Camsap3	sp|Q80VC9|CAMP3_MOUSE Calmodulin-regulated spectrin-associated protein 3 OS=Mus musculus OX=10090 GN=Camsap3 PE=1 SV=1	1	19	19	19	13	9	12	13	17	18	13	9	12	13	17	18	13	9	12	13	17	18	23.6	23.6	23.6	135.17	1252	1252	4.19	11	15	35	43	14	0	65.46	By MS/MS	By MS/MS	By MS/MS	By MS/MS	By MS/MS	By MS/MS
P24788;A2A9P6;Q64434	P24788;A2A9P6	19;18;1	19;18;1	19;18;1	Cyclin-dependent kinase 11B	Cdk11b	sp|P24788|CD11B_MOUSE Cyclin-dependent kinase 11B OS=Mus musculus OX=10090 GN=Cdk11b PE=1 SV=2;tr|A2A9P6|A2A9P6_MOUSE Cyclin-dependent kinase 11B OS=Mus musculus OX=10090 GN=Cdk11b PE=1 SV=1	3	19	19	19	15	15	17	17	17	15	15	15	17	17	17	15	15	15	17	17	17	15	26.7	26.7	26.7	91.512	784	784;750;451	3.64	62	10	17	23	56	0	68.59	By MS/MS	By MS/MS	By MS/MS	By MS/MS	By MS/MS	By MS/MS
Q8K327	Q8K327	19	19	19	Chromosome alignment-maintaining phosphoprotein 1	Champ1	sp|Q8K327|CHAP1_MOUSE Chromosome alignment-maintaining phosphoprotein 1 OS=Mus musculus OX=10090 GN=Champ1 PE=1 SV=1	1	19	19	19	15	13	15	10	12	13	15	13	15	10	12	13	15	13	15	10	12	13	28.7	28.7	28.7	87.56	802	802	3.69	28	27	25	32	19	0	55.86	By MS/MS	By MS/MS	By MS/MS	By MS/MS	By MS/MS	By MS/MS
Q8BMK4	Q8BMK4	19	19	19	Cytoskeleton-associated protein 4	Ckap4	sp|Q8BMK4|CKAP4_MOUSE Cytoskeleton-associated protein 4 OS=Mus musculus OX=10090 GN=Ckap4 PE=1 SV=2	1	19	19	19	14	14	18	11	14	13	14	14	18	11	14	13	14	14	18	11	14	13	40.7	40.7	40.7	63.691	575	575	3.99	33	2	34	40	30	0	148.87	By MS/MS	By MS/MS	By MS/MS	By MS/MS	By MS/MS	By MS/MS
P39061;E9QPX1;A0A1W2P6N8	P39061;E9QPX1	19;19;1	19;19;1	19;19;1	Collagen alpha-1(XVIII) chain;Endostatin	Col18a1	sp|P39061|COIA1_MOUSE Collagen alpha-1(XVIII) chain OS=Mus musculus OX=10090 GN=Col18a1 PE=1 SV=4;tr|E9QPX1|E9QPX1_MOUSE Collagen alpha-1(XVIII) chain OS=Mus musculus OX=10090 GN=Col18a1 PE=1 SV=1	3	19	19	19	15	18	15	8	7	9	15	18	15	8	7	9	15	18	15	8	7	9	14.7	14.7	14.7	182.17	1774	1774;1774;225	3.75	41	14	35	30	34	0	173.77	By MS/MS	By MS/MS	By MS/MS	By MS/MS	By MS/MS	By MS/MS
Q7TSG2;E0CZ13	Q7TSG2	19;1	19;1	19;1	RNA polymerase II subunit A C-terminal domain phosphatase	Ctdp1	sp|Q7TSG2|CTDP1_MOUSE RNA polymerase II subunit A C-terminal domain phosphatase OS=Mus musculus OX=10090 GN=Ctdp1 PE=1 SV=1	2	19	19	19	15	12	16	11	17	13	15	12	16	11	17	13	15	12	16	11	17	13	32.7	32.7	32.7	104.55	960	960;172	3.96	29	17	27	36	31	0	99.265	By MS/MS	By MS/MS	By MS/MS	By MS/MS	By MS/MS	By MS/MS
Q80Y44	Q80Y44	19	19	19	Probable ATP-dependent RNA helicase DDX10	Ddx10	sp|Q80Y44|DDX10_MOUSE Probable ATP-dependent RNA helicase DDX10 OS=Mus musculus OX=10090 GN=Ddx10 PE=1 SV=2	1	19	19	19	10	13	15	14	11	12	10	13	15	14	11	12	10	13	15	14	11	12	29.4	29.4	29.4	100.74	875	875	4	27	6	20	23	32	0	103.67	By MS/MS	By MS/MS	By MS/MS	By MS/MS	By MS/MS	By MS/MS
Q3UH60;Q8BWT5;F8WI56;D3Z7D3	Q3UH60	19;2;2;2	19;2;2;2	4;0;0;0	Disco-interacting protein 2 homolog B	Dip2b	sp|Q3UH60|DIP2B_MOUSE Disco-interacting protein 2 homolog B OS=Mus musculus OX=10090 GN=Dip2b PE=1 SV=1	4	19	19	4	13	11	17	7	6	8	13	11	17	7	6	8	4	2	4	1	3	4	17.5	17.5	3.9	171.12	1574	1574;1523;1562;1572	4.53	4	13	14	20	22	0	59.358	By MS/MS	By MS/MS	By MS/MS	By MS/MS	By MS/MS	By MS/MS
Q8BMF4	Q8BMF4	19	19	19	Dihydrolipoyllysine-residue acetyltransferase component of pyruvate dehydrogenase complex, mitochondrial	Dlat	sp|Q8BMF4|ODP2_MOUSE Dihydrolipoyllysine-residue acetyltransferase component of pyruvate dehydrogenase complex, mitochondrial OS=Mus musculus OX=10090 GN=Dlat PE=1 SV=2	1	19	19	19	17	15	17	14	17	17	17	15	17	14	17	17	17	15	17	14	17	17	31.3	31.3	31.3	67.941	642	642	3.28	81	29	45	39	34	0	117.42	By MS/MS	By MS/MS	By MS/MS	By MS/MS	By MS/MS	By MS/MS
P54103;E9Q9H3;E9Q9H2;Q3TRX6	P54103;E9Q9H3;E9Q9H2	19;17;16;7	19;17;16;7	19;17;16;7	DnaJ homolog subfamily C member 2;DnaJ homolog subfamily C member 2, N-terminally processed	Dnajc2	sp|P54103|DNJC2_MOUSE DnaJ homolog subfamily C member 2 OS=Mus musculus OX=10090 GN=Dnajc2 PE=1 SV=2;tr|E9Q9H3|E9Q9H3_MOUSE DnaJ homolog subfamily C member 2 OS=Mus musculus OX=10090 GN=Dnajc2 PE=1 SV=1;tr|E9Q9H2|E9Q9H2_MOUSE DnaJ homolog subfamily C membe	4	19	19	19	17	16	15	14	19	17	17	16	15	14	19	17	17	16	15	14	19	17	36.7	36.7	36.7	71.721	621	621;619;547;191	3.08	70	34	27	35	19	0	119.94	By MS/MS	By MS/MS	By MS/MS	By MS/MS	By MS/MS	By MS/MS
A0A0R4IZY9;Q91XI1	A0A0R4IZY9;Q91XI1	19;17	19;17	19;17	tRNA-dihydrouridine(47) synthase [NAD(P)(+)]-like	Dus3l	tr|A0A0R4IZY9|A0A0R4IZY9_MOUSE tRNA-dihydrouridine(47) synthase [NAD(P)(+)] OS=Mus musculus OX=10090 GN=Dus3l PE=1 SV=1;sp|Q91XI1|DUS3L_MOUSE tRNA-dihydrouridine(47) synthase [NAD(P)(+)]-like OS=Mus musculus OX=10090 GN=Dus3l PE=1 SV=1	2	19	19	19	12	7	16	12	16	14	12	7	16	12	16	14	12	7	16	12	16	14	36.6	36.6	36.6	71.15	637	637;637	3.27	39	26	13	9	26	0	106.68	By MS/MS	By MS/MS	By MS/MS	By MS/MS	By MS/MS	By MS/MS
Q8C0D5;D3Z1V3;A0A140LHB7	Q8C0D5	19;3;2	19;3;2	19;3;2	Elongation factor Tu GTP-binding domain-containing protein 1	Eftud1	sp|Q8C0D5|EFL1_MOUSE Elongation factor-like GTPase 1 OS=Mus musculus OX=10090 GN=Efl1 PE=1 SV=1	3	19	19	19	14	10	10	15	14	13	14	10	10	15	14	13	14	10	10	15	14	13	24.1	24.1	24.1	125.78	1127	1127;234;103	4.12	20	11	20	26	29	0	86.608	By MS/MS	By MS/MS	By MS/MS	By MS/MS	By MS/MS	By MS/MS
P10630;Q8BTU6;E9Q561;A0A338P6X5	P10630;Q8BTU6;E9Q561;A0A338P6X5	19;18;15;15	4;3;3;3	4;3;3;3	Eukaryotic initiation factor 4A-II;Eukaryotic initiation factor 4A-II, N-terminally processed	Eif4a2	sp|P10630|IF4A2_MOUSE Eukaryotic initiation factor 4A-II OS=Mus musculus OX=10090 GN=Eif4a2 PE=1 SV=2;tr|Q8BTU6|Q8BTU6_MOUSE RNA helicase OS=Mus musculus OX=10090 GN=Eif4a2 PE=1 SV=1;tr|E9Q561|E9Q561_MOUSE Eukaryotic initiation factor 4A-II OS=Mus musculus	4	19	4	4	12	19	17	19	17	16	2	4	4	4	3	4	2	4	4	4	3	4	42.8	13.3	13.3	46.402	407	407;362;312;322	3.5	8	1	17	8		0	36.597	By MS/MS	By MS/MS	By MS/MS	By MS/MS	By MS/MS	By MS/MS
P70372	P70372	19	19	19	ELAV-like protein 1	Elavl1	sp|P70372|ELAV1_MOUSE ELAV-like protein 1 OS=Mus musculus OX=10090 GN=Elavl1 PE=1 SV=2	1	19	19	19	16	17	16	16	17	16	16	17	16	16	17	16	16	17	16	16	17	16	66	66	66	36.169	326	326	3.13	110	33	31	44	45	0	137.64	By MS/MS	By MS/MS	By MS/MS	By MS/MS	By MS/MS	By MS/MS
A2AUK7;A2AUK8;Q9Z2H5;A2AUK5;A0A2R8VHB6	A2AUK7;A2AUK8;Q9Z2H5;A2AUK5	19;19;18;18;5	19;19;18;18;5	1;1;0;0;1	Band 4.1-like protein 1	Epb4.1l1;Epb41l1	tr|A2AUK7|A2AUK7_MOUSE Band 4.1-like protein 1 OS=Mus musculus OX=10090 GN=Epb41l1 PE=1 SV=1;tr|A2AUK8|A2AUK8_MOUSE Band 4.1-like protein 1 OS=Mus musculus OX=10090 GN=Epb41l1 PE=1 SV=1;sp|Q9Z2H5|E41L1_MOUSE Band 4.1-like protein 1 OS=Mus musculus OX=10090	5	19	19	1	13	15	16	7	10	11	13	15	16	7	10	11	1	1	1	1	0	1	34.1	34.1	1.5	81.89	730	730;867;879;879;213	4.3	13	18	25	37	28	0	90.711	By MS/MS	By MS/MS	By MS/MS	By MS/MS	By MS/MS	By MS/MS
O35382;Q8C391;Q9CXE1	O35382	19;9;8	19;9;8	19;9;8	Exocyst complex component 4	Exoc4	sp|O35382|EXOC4_MOUSE Exocyst complex component 4 OS=Mus musculus OX=10090 GN=Exoc4 PE=1 SV=2	3	19	19	19	9	13	10	11	13	14	9	13	10	11	13	14	9	13	10	11	13	14	25.1	25.1	25.1	110.54	975	975;506;522	4.2	16	21	5	27	31	0	58.658	By MS/MS	By MS/MS	By MS/MS	By MS/MS	By MS/MS	By MS/MS
Q6P5B5	Q6P5B5	19	17	1		Fxr2	tr|Q6P5B5|Q6P5B5_MOUSE Fragile X mental retardation syndrome-related protein 2 OS=Mus musculus OX=10090 GN=Fxr2 PE=1 SV=1	1	19	17	1	14	13	19	14	17	17	12	11	17	12	15	15	0	0	1	0	1	1	38	35.6	1.9	74.252	674	674	3.32	43	19	43	34	7	0	144.21	By MS/MS	By MS/MS	By MS/MS	By MS/MS	By MS/MS	By MS/MS
P97855	P97855	19	17	17	Ras GTPase-activating protein-binding protein 1	G3bp1	sp|P97855|G3BP1_MOUSE Ras GTPase-activating protein-binding protein 1 OS=Mus musculus OX=10090 GN=G3bp1 PE=1 SV=1	1	19	17	17	17	15	16	18	17	17	15	13	14	16	15	15	15	13	14	16	15	15	47.1	44.5	44.5	51.828	465	465	3.65	117	17	29	71	92	0	235.38	By MS/MS	By MS/MS	By MS/MS	By MS/MS	By MS/MS	By MS/MS
Q6DFZ1;H3BLN1;A0A668KLD0	Q6DFZ1	19;3;1	19;3;1	19;3;1		Gbf1	tr|Q6DFZ1|Q6DFZ1_MOUSE Golgi-specific brefeldin A-resistance factor 1 OS=Mus musculus OX=10090 GN=Gbf1 PE=1 SV=1	3	19	19	19	7	9	11	9	10	9	7	9	11	9	10	9	7	9	11	9	10	9	14.3	14.3	14.3	206.78	1861	1861;117;187	4.67	5	12	3	18	26	0	60.709	By MS/MS	By MS/MS	By MS/MS	By MS/MS	By MS/MS	By MS/MS
Q99LH1;B1ASC2	Q99LH1	19;3	19;3	19;3	Nucleolar GTP-binding protein 2	Gnl2	sp|Q99LH1|NOG2_MOUSE Nucleolar GTP-binding protein 2 OS=Mus musculus OX=10090 GN=Gnl2 PE=1 SV=2	2	19	19	19	13	11	14	13	18	17	13	11	14	13	18	17	13	11	14	13	18	17	32.7	32.7	32.7	83.345	728	728;100	3.79	53	15	18	29	55	0	91.912	By MS/MS	By MS/MS	By MS/MS	By MS/MS	By MS/MS	By MS/MS
Q99LD4;G3UXW9;Q3MIA8;A0A140LJB7;B1ATU4	Q99LD4;G3UXW9;Q3MIA8;A0A140LJB7;B1ATU4	19;19;19;18;18	19;19;19;18;18	19;19;19;18;18	COP9 signalosome complex subunit 1	Gps1	sp|Q99LD4|CSN1_MOUSE COP9 signalosome complex subunit 1 OS=Mus musculus OX=10090 GN=Gps1 PE=1 SV=1;tr|G3UXW9|G3UXW9_MOUSE COP9 signalosome complex subunit 1 OS=Mus musculus OX=10090 GN=Gps1 PE=1 SV=1;tr|Q3MIA8|Q3MIA8_MOUSE COP9 signalosome complex subunit	5	19	19	19	15	16	15	13	13	14	15	16	15	13	13	14	15	16	15	13	13	14	45	45	45	53.442	471	471;526;487;486;490	4.12	56		9	33	78	0	67.918	By MS/MS	By MS/MS	By MS/MS	By MS/MS	By MS/MS	By MS/MS
Q69ZR2;F8WIE5	Q69ZR2;F8WIE5	19;19	19;19	19;19	E3 ubiquitin-protein ligase HECTD1	Hectd1	sp|Q69ZR2|HECD1_MOUSE E3 ubiquitin-protein ligase HECTD1 OS=Mus musculus OX=10090 GN=Hectd1 PE=1 SV=2;tr|F8WIE5|F8WIE5_MOUSE HECT-type E3 ubiquitin transferase OS=Mus musculus OX=10090 GN=Hectd1 PE=1 SV=1	2	19	19	19	10	7	10	10	14	17	10	7	10	10	14	17	10	7	10	10	14	17	10.4	10.4	10.4	290.08	2618	2618;2610	4.85	3	2	25	19	29	0	53.238	By MS/MS	By MS/MS	By MS/MS	By MS/MS	By MS/MS	By MS/MS
Q5SF07;A6X8Z3	Q5SF07;A6X8Z3	19;15	18;14	18;14	Insulin-like growth factor 2 mRNA-binding protein 2	Igf2bp2	sp|Q5SF07|IF2B2_MOUSE Insulin-like growth factor 2 mRNA-binding protein 2 OS=Mus musculus OX=10090 GN=Igf2bp2 PE=1 SV=1;tr|A6X8Z3|A6X8Z3_MOUSE Insulin-like growth factor 2 mRNA-binding protein 2 OS=Mus musculus OX=10090 GN=Igf2bp2 PE=1 SV=1	2	19	18	18	17	11	16	17	17	16	16	10	15	16	16	15	16	10	15	16	16	15	37.7	35.5	35.5	65.583	592	592;524	4.25	20	18	26	32	40	0	84.398	By MS/MS	By MS/MS	By MS/MS	By MS/MS	By MS/MS	By MS/MS
Q9Z1M8;A0A494BAW7	Q9Z1M8	19;4	19;4	19;4	Protein Red	Ik	sp|Q9Z1M8|RED_MOUSE Protein Red OS=Mus musculus OX=10090 GN=Ik PE=1 SV=2	2	19	19	19	9	8	13	10	12	13	9	8	13	10	12	13	9	8	13	10	12	13	37.3	37.3	37.3	65.615	557	557;133	3.71	24	30	26	22	22	0	79.321	By MS/MS	By MS/MS	By MS/MS	By MS/MS	By MS/MS	By MS/MS
Q6P4S8;K3W4P2;A0A0G2JH17;A0A0G2JFR3;A0A0G2JDG8	Q6P4S8;K3W4P2;A0A0G2JH17	19;19;19;3;3	19;19;19;3;3	19;19;19;3;3	Integrator complex subunit 1	Ints1	sp|Q6P4S8|INT1_MOUSE Integrator complex subunit 1 OS=Mus musculus OX=10090 GN=Ints1 PE=1 SV=2;tr|K3W4P2|K3W4P2_MOUSE Integrator complex subunit 1 OS=Mus musculus OX=10090 GN=Ints1 PE=1 SV=2;tr|A0A0G2JH17|A0A0G2JH17_MOUSE Integrator complex subunit 1 OS=Mus	5	19	19	19	9	14	10	9	9	8	9	14	10	9	9	8	9	14	10	9	9	8	11.3	11.3	11.3	245.16	2195	2195;2220;2222;137;175	4.91	5	1	15	27	30	0	52.617	By MS/MS	By MS/MS	By MS/MS	By MS/MS	By MS/MS	By MS/MS
Q8CIM8;A0A0U1RPX1	Q8CIM8	19;1	19;1	19;1	Integrator complex subunit 4	Ints4	sp|Q8CIM8|INT4_MOUSE Integrator complex subunit 4 OS=Mus musculus OX=10090 GN=Ints4 PE=1 SV=1	2	19	19	19	10	11	15	10	11	11	10	11	15	10	11	11	10	11	15	10	11	11	28.2	28.2	28.2	108.19	964	964;63	4.69	15	2	9	25	44	0	86.115	By MS/MS	By MS/MS	By MS/MS	By MS/MS	By MS/MS	By MS/MS
Q3UQ44	Q3UQ44	19	16	16	Ras GTPase-activating-like protein IQGAP2	Iqgap2	sp|Q3UQ44|IQGA2_MOUSE Ras GTPase-activating-like protein IQGAP2 OS=Mus musculus OX=10090 GN=Iqgap2 PE=1 SV=2	1	19	16	16	11	7	10	4	5	9	9	5	8	2	3	6	9	5	8	2	3	6	14.8	13	13	180.53	1575	1575	4.15	6	1	17	7	9	0	37.299	By MS/MS	By MS/MS	By MS/MS	By MS/MS	By MS/MS	By MS/MS
Q02257	Q02257	19	16	16	Junction plakoglobin	Jup	sp|Q02257|PLAK_MOUSE Junction plakoglobin OS=Mus musculus OX=10090 GN=Jup PE=1 SV=3	1	19	16	16	11	12	16	8	11	10	8	11	13	6	10	8	8	11	13	6	10	8	30.1	25.9	25.9	81.8	745	745	3.73	17	20	17	12	18	0	52.704	By MS/MS	By MS/MS	By MS/MS	By MS/MS	By MS/MS	By MS/MS
E9PUA5;G3UX22	E9PUA5	19;2	2;0	2;0	Kinesin-like protein	Kifc5b	tr|E9PUA5|E9PUA5_MOUSE Kinesin-like protein OS=Mus musculus OX=10090 GN=Kifc5b PE=1 SV=1	2	19	2	2	13	11	14	8	10	14	1	0	2	0	0	1	1	0	2	0	0	1	34.1	6.1	6.1	73.681	672	672;79	2	3			1		0.00069626	3.296	By matching	By matching	By MS/MS	By matching	By matching	By MS/MS
Q9WTX8	Q9WTX8	19	19	19	Mitotic spindle assembly checkpoint protein MAD1	Mad1l1	sp|Q9WTX8|MD1L1_MOUSE Mitotic spindle assembly checkpoint protein MAD1 OS=Mus musculus OX=10090 GN=Mad1l1 PE=1 SV=1	1	19	19	19	16	15	17	18	15	14	16	15	17	18	15	14	16	15	17	18	15	14	31.4	31.4	31.4	83.54	717	717	3.63	31	32	34	48	10	0	65.051	By MS/MS	By MS/MS	By MS/MS	By MS/MS	By MS/MS	By MS/MS
Q8BI84;A0A0R4J2D3	Q8BI84;A0A0R4J2D3	19;11	19;11	11;11	Melanoma inhibitory activity protein 3	Mia3	sp|Q8BI84|TGO1_MOUSE Transport and Golgi organization protein 1 homolog OS=Mus musculus OX=10090 GN=Mia3 PE=1 SV=2;tr|A0A0R4J2D3|A0A0R4J2D3_MOUSE Transport and Golgi organization protein 1 homolog (Fragment) OS=Mus musculus OX=10090 GN=Mia3 PE=1 SV=2	2	19	19	11	12	12	11	9	13	13	12	12	11	9	13	13	6	6	6	4	7	6	13.2	13.2	7.7	213.67	1930	1930;1008	3.82	5	21	30	22		0	59.275	By MS/MS	By MS/MS	By MS/MS	By MS/MS	By MS/MS	By MS/MS
Q9D0F1;A0A3B2WAS6;A0A3B2WDB5	Q9D0F1;A0A3B2WAS6	19;18;2	19;18;2	19;18;2	Kinetochore protein NDC80 homolog	Ndc80	sp|Q9D0F1|NDC80_MOUSE Kinetochore protein NDC80 homolog OS=Mus musculus OX=10090 GN=Ndc80 PE=1 SV=1;tr|A0A3B2WAS6|A0A3B2WAS6_MOUSE Kinetochore protein Hec1 OS=Mus musculus OX=10090 GN=Ndc80 PE=1 SV=1	3	19	19	19	11	7	15	15	17	17	11	7	15	15	17	17	11	7	15	15	17	17	34.9	34.9	34.9	73.961	642	642;629;60	4.24	19	16	23	27	38	0	66.302	By MS/MS	By MS/MS	By MS/MS	By MS/MS	By MS/MS	By MS/MS
Q01768	Q01768	19	1	1	Nucleoside diphosphate kinase B	Nme2	sp|Q01768|NDKB_MOUSE Nucleoside diphosphate kinase B OS=Mus musculus OX=10090 GN=Nme2 PE=1 SV=1	1	19	1	1	15	19	18	18	18	17	1	1	1	1	1	1	1	1	1	1	1	1	96.1	11.2	11.2	17.363	152	152	1	6					0.002038	2.8635	By MS/MS	By MS/MS	By MS/MS	By MS/MS	By MS/MS	By MS/MS
Q61937;Q5SQB0;Q9DAY9;Q5SQB5	Q61937;Q5SQB0;Q9DAY9;Q5SQB5	19;18;16;16	19;18;16;16	19;18;16;16	Nucleophosmin	Npm1	sp|Q61937|NPM_MOUSE Nucleophosmin OS=Mus musculus OX=10090 GN=Npm1 PE=1 SV=1;tr|Q5SQB0|Q5SQB0_MOUSE Nucleophosmin OS=Mus musculus OX=10090 GN=Npm1 PE=1 SV=1;tr|Q9DAY9|Q9DAY9_MOUSE Nucleophosmin OS=Mus musculus OX=10090 GN=Npm1 PE=1 SV=1;tr|Q5SQB5|Q5SQB5_MO	4	19	19	19	15	19	16	17	16	16	15	19	16	17	16	16	15	19	16	17	16	16	60.6	60.6	60.6	32.56	292	292;264;257;285	3.52	281	97	195	172	167	0	323.31	By MS/MS	By MS/MS	By MS/MS	By MS/MS	By MS/MS	By MS/MS
Q5F2E7	Q5F2E7	19	19	19	Nuclear fragile X mental retardation-interacting protein 2	Nufip2	sp|Q5F2E7|NUFP2_MOUSE Nuclear fragile X mental retardation-interacting protein 2 OS=Mus musculus OX=10090 GN=Nufip2 PE=1 SV=1	1	19	19	19	17	15	19	17	19	18	17	15	19	17	19	18	17	15	19	17	19	18	37.1	37.1	37.1	75.656	692	692	3.26	80	46	62	57	17	0	323.31	By MS/MS	By MS/MS	By MS/MS	By MS/MS	By MS/MS	By MS/MS
Q9Z1N2	Q9Z1N2	19	19	19	Origin recognition complex subunit 1	Orc1	sp|Q9Z1N2|ORC1_MOUSE Origin recognition complex subunit 1 OS=Mus musculus OX=10090 GN=Orc1 PE=1 SV=2	1	19	19	19	15	14	16	11	12	13	15	14	16	11	12	13	15	14	16	11	12	13	28.7	28.7	28.7	95.102	840	840	4.31	19	6	28	41	30	0	98.819	By MS/MS	By MS/MS	By MS/MS	By MS/MS	By MS/MS	By MS/MS
P63005;Q5SW16	P63005	19;7	19;7	19;7	Platelet-activating factor acetylhydrolase IB subunit alpha	Pafah1b1	sp|P63005|LIS1_MOUSE Platelet-activating factor acetylhydrolase IB subunit alpha OS=Mus musculus OX=10090 GN=Pafah1b1 PE=1 SV=2	2	19	19	19	16	16	16	15	17	15	16	16	16	15	17	15	16	16	16	15	17	15	45.6	45.6	45.6	46.67	410	410;97	3.54	39	38	36	42	17	0	73.513	By MS/MS	By MS/MS	By MS/MS	By MS/MS	By MS/MS	By MS/MS
P58501;F6YY19	P58501	19;8	19;8	19;8	PAX3- and PAX7-binding protein 1	Paxbp1	sp|P58501|PAXB1_MOUSE PAX3- and PAX7-binding protein 1 OS=Mus musculus OX=10090 GN=Paxbp1 PE=1 SV=3	2	19	19	19	13	10	16	13	12	10	13	10	16	13	12	10	13	10	16	13	12	10	24	24	24	104.83	919	919;450	4.25	8	27	18	6	34	0	65.792	By MS/MS	By MS/MS	By MS/MS	By MS/MS	By MS/MS	By MS/MS
P17918	P17918	19	19	19	Proliferating cell nuclear antigen	Pcna	sp|P17918|PCNA_MOUSE Proliferating cell nuclear antigen OS=Mus musculus OX=10090 GN=Pcna PE=1 SV=2	1	19	19	19	14	16	17	16	17	16	14	16	17	16	17	16	14	16	17	16	17	16	77.8	77.8	77.8	28.785	261	261	3.73	112	45	71	79	96	0	244.41	By MS/MS	By MS/MS	By MS/MS	By MS/MS	By MS/MS	By MS/MS
Q9DBJ1;O70250	Q9DBJ1	19;4	19;4	19;4	Phosphoglycerate mutase 1	Pgam1	sp|Q9DBJ1|PGAM1_MOUSE Phosphoglycerate mutase 1 OS=Mus musculus OX=10090 GN=Pgam1 PE=1 SV=3	2	19	19	19	12	16	16	17	16	16	12	16	16	17	16	16	12	16	16	17	16	16	68.1	68.1	68.1	28.832	254	254;253	3.79	133	40	50	107	119	0	323.31	By MS/MS	By MS/MS	By MS/MS	By MS/MS	By MS/MS	By MS/MS
Q9DCD0	Q9DCD0	19	19	19	6-phosphogluconate dehydrogenase, decarboxylating	Pgd	sp|Q9DCD0|6PGD_MOUSE 6-phosphogluconate dehydrogenase, decarboxylating OS=Mus musculus OX=10090 GN=Pgd PE=1 SV=3	1	19	19	19	14	17	17	17	15	16	14	17	17	17	15	16	14	17	17	17	15	16	45.5	45.5	45.5	53.247	483	483	3.46	87	11	28	43	54	0	161.82	By MS/MS	By MS/MS	By MS/MS	By MS/MS	By MS/MS	By MS/MS
Q8BWW9;G3UXH4;G3UZM9;G3UYD6;Q8K045	Q8BWW9;G3UXH4;G3UZM9	19;19;18;5;1	19;19;18;5;1	18;18;17;5;0	Serine/threonine-protein kinase N2	Pkn2	sp|Q8BWW9|PKN2_MOUSE Serine/threonine-protein kinase N2 OS=Mus musculus OX=10090 GN=Pkn2 PE=1 SV=3;tr|G3UXH4|G3UXH4_MOUSE Protein kinase C OS=Mus musculus OX=10090 GN=Pkn2 PE=1 SV=1;tr|G3UZM9|G3UZM9_MOUSE Protein kinase C OS=Mus musculus OX=10090 GN=Pkn2 P	5	19	19	18	14	10	15	7	13	11	14	10	15	7	13	11	13	9	14	6	12	10	23.9	23.9	23.1	111.61	983	983;935;967;210;878	3.92	7	29	20	23	10	0	66.716	By MS/MS	By MS/MS	By MS/MS	By MS/MS	By MS/MS	By MS/MS
Q6ZQB6;E9Q9J4;A0A087WPZ7;A2ARP1;F6VU93	Q6ZQB6;E9Q9J4	19;18;3;2;1	19;18;3;2;1	19;18;3;2;1	Inositol hexakisphosphate and diphosphoinositol-pentakisphosphate kinase 2	Ppip5k2	sp|Q6ZQB6|VIP2_MOUSE Inositol hexakisphosphate and diphosphoinositol-pentakisphosphate kinase 2 OS=Mus musculus OX=10090 GN=Ppip5k2 PE=1 SV=3;tr|E9Q9J4|E9Q9J4_MOUSE Inositol hexakisphosphate and diphosphoinositol-pentakisphosphate kinase OS=Mus musculus OX	5	19	19	19	15	12	9	8	8	8	15	12	9	8	8	8	15	12	9	8	8	8	23.3	23.3	23.3	128.43	1129	1129;1242;92;1436;118	4.65	5		32	15	25	0	57.192	By MS/MS	By MS/MS	By MS/MS	By MS/MS	By MS/MS	By MS/MS
P62141;A0A0J9YUU8;A0A0J9YUG2	P62141	19;4;3	9;2;1	8;2;1	Serine/threonine-protein phosphatase PP1-beta catalytic subunit	Ppp1cb	sp|P62141|PP1B_MOUSE Serine/threonine-protein phosphatase PP1-beta catalytic subunit OS=Mus musculus OX=10090 GN=Ppp1cb PE=1 SV=3	3	19	9	8	17	17	18	17	18	16	8	8	9	8	9	8	7	7	8	7	8	7	79.5	48.6	45.3	37.186	327	327;100;59	3.17	43	17	5	7	28	0	48.973	By MS/MS	By MS/MS	By MS/MS	By MS/MS	By MS/MS	By MS/MS
Q9R1C7;A0A1B0GRU8;A2AQW6;A0A1B0GSF1	Q9R1C7;A0A1B0GRU8	19;18;1;1	19;18;1;1	18;17;1;1	Pre-mRNA-processing factor 40 homolog A	Prpf40a	sp|Q9R1C7|PR40A_MOUSE Pre-mRNA-processing factor 40 homolog A OS=Mus musculus OX=10090 GN=Prpf40a PE=1 SV=1;tr|A0A1B0GRU8|A0A1B0GRU8_MOUSE Pre-mRNA-processing factor 40 homolog A OS=Mus musculus OX=10090 GN=Prpf40a PE=1 SV=1	4	19	19	18	16	16	17	14	16	14	16	16	17	14	16	14	15	15	16	13	15	14	22.4	22.4	21.1	108.48	953	953;926;100;129	3.32	76	13	43	34	35	0	136.08	By MS/MS	By MS/MS	By MS/MS	By MS/MS	By MS/MS	By MS/MS
Q99K85;Q3U6K9;E9Q6P1	Q99K85;Q3U6K9	19;17;9	19;17;9	19;17;9	Phosphoserine aminotransferase	Psat1	sp|Q99K85|SERC_MOUSE Phosphoserine aminotransferase OS=Mus musculus OX=10090 GN=Psat1 PE=1 SV=1;tr|Q3U6K9|Q3U6K9_MOUSE Phosphoserine aminotransferase OS=Mus musculus OX=10090 GN=Psat1 PE=1 SV=1	3	19	19	19	14	13	13	17	18	19	14	13	13	17	18	19	14	13	13	17	18	19	63	63	63	40.472	370	370;367;157	3.69	78	20	41	38	70	0	301.51	By MS/MS	By MS/MS	By MS/MS	By MS/MS	By MS/MS	By MS/MS
P62334	P62334	19	19	19	26S protease regulatory subunit 10B	Psmc6	sp|P62334|PRS10_MOUSE 26S proteasome regulatory subunit 10B OS=Mus musculus OX=10090 GN=Psmc6 PE=1 SV=1	1	19	19	19	14	14	16	12	17	16	14	14	16	12	17	16	14	14	16	12	17	16	48.3	48.3	48.3	44.172	389	389	3.52	87	6	41	66	42	0	100.93	By MS/MS	By MS/MS	By MS/MS	By MS/MS	By MS/MS	By MS/MS
Q8BU03	Q8BU03	19	19	19	Periodic tryptophan protein 2 homolog	Pwp2	sp|Q8BU03|PWP2_MOUSE Periodic tryptophan protein 2 homolog OS=Mus musculus OX=10090 GN=Pwp2 PE=1 SV=1	1	19	19	19	7	14	8	13	11	8	7	14	8	13	11	8	7	14	8	13	11	8	27.2	27.2	27.2	102.91	919	919	3.91	27	9	14	11	35	0	76.038	By MS/MS	By MS/MS	By MS/MS	By MS/MS	By MS/MS	By MS/MS
A0A338P6K9;A2BIE1;A0A5F8MPS4	A0A338P6K9;A2BIE1	19;18;1	19;18;1	19;18;1		Qser1	tr|A0A338P6K9|A0A338P6K9_MOUSE Glutamine and serine-rich 1 OS=Mus musculus OX=10090 GN=Qser1 PE=1 SV=1;tr|A2BIE1|A2BIE1_MOUSE Glutamine and serine-rich 1 OS=Mus musculus OX=10090 GN=Qser1 PE=1 SV=2	3	19	19	19	13	11	15	14	14	12	13	11	15	14	14	12	13	11	15	14	14	12	15.5	15.5	15.5	194.47	1788	1788;1698;118	3.72	20	39	15	29	18	0	76.158	By MS/MS	By MS/MS	By MS/MS	By MS/MS	By MS/MS	By MS/MS
Q8C796;A0A0R4J1I0;D3YUX3	Q8C796;A0A0R4J1I0	19;19;1	19;19;1	17;17;1	REST corepressor 2	Rcor2	sp|Q8C796|RCOR2_MOUSE REST corepressor 2 OS=Mus musculus OX=10090 GN=Rcor2 PE=1 SV=1;tr|A0A0R4J1I0|A0A0R4J1I0_MOUSE REST corepressor 2 OS=Mus musculus OX=10090 GN=Rcor2 PE=1 SV=1	3	19	19	17	18	11	18	11	16	14	18	11	18	11	16	14	16	9	16	10	14	13	51.4	51.4	48.6	57.907	523	523;479;76	3.78	40	10	29	43	27	0	202.98	By MS/MS	By MS/MS	By MS/MS	By MS/MS	By MS/MS	By MS/MS
Q9D706	Q9D706	19	19	19	RNA polymerase II-associated protein 3	Rpap3	sp|Q9D706|RPAP3_MOUSE RNA polymerase II-associated protein 3 OS=Mus musculus OX=10090 GN=Rpap3 PE=1 SV=1	1	19	19	19	14	10	13	14	15	12	14	10	13	14	15	12	14	10	13	14	15	12	34.8	34.8	34.8	74.095	660	660	3.54	32	13	43	28	11	0	73.381	By MS/MS	By MS/MS	By MS/MS	By MS/MS	By MS/MS	By MS/MS
Q6ZWV3;I7HLV2	Q6ZWV3;I7HLV2	19;18	19;18	2;1	60S ribosomal protein L10	Rpl10	sp|Q6ZWV3|RL10_MOUSE 60S ribosomal protein L10 OS=Mus musculus OX=10090 GN=Rpl10 PE=1 SV=3;tr|I7HLV2|I7HLV2_MOUSE 60S ribosomal protein L10 (Fragment) OS=Mus musculus OX=10090 GN=Rpl10 PE=1 SV=1	2	19	19	2	12	18	18	19	18	18	12	18	18	19	18	18	1	2	2	2	2	2	69.6	69.6	10.7	24.604	214	214;201	3.02	209	23	38	76	79	0	276.15	By MS/MS	By MS/MS	By MS/MS	By MS/MS	By MS/MS	By MS/MS
P86048;A0A1B0GXC3	P86048	19;8	2;0	2;0	60S ribosomal protein L10-like	Rpl10l	sp|P86048|RL10L_MOUSE 60S ribosomal protein L10-like OS=Mus musculus OX=10090 GN=Rpl10l PE=2 SV=1	2	19	2	2	13	18	18	19	18	18	2	2	2	2	2	2	2	2	2	2	2	2	67.8	8.9	8.9	24.558	214	214;166	2.97	12	6	6	1	5	0	5.9571	By MS/MS	By MS/MS	By MS/MS	By MS/MS	By MS/MS	By MS/MS
P12970;V9GX35	P12970	19;3	19;3	19;3	60S ribosomal protein L7a	Rpl7a	sp|P12970|RL7A_MOUSE 60S ribosomal protein L7a OS=Mus musculus OX=10090 GN=Rpl7a PE=1 SV=2	2	19	19	19	15	18	17	18	18	16	15	18	17	18	18	16	15	18	17	18	18	16	56.8	56.8	56.8	29.976	266	266;225	3.48	142	44	54	89	84	0	308.88	By MS/MS	By MS/MS	By MS/MS	By MS/MS	By MS/MS	By MS/MS
P62281;A0A1B0GRR3;A0A1B0GSE8	P62281;A0A1B0GRR3;A0A1B0GSE8	19;16;11	19;16;11	19;16;11	40S ribosomal protein S11	Rps11	sp|P62281|RS11_MOUSE 40S ribosomal protein S11 OS=Mus musculus OX=10090 GN=Rps11 PE=1 SV=3;tr|A0A1B0GRR3|A0A1B0GRR3_MOUSE 40S ribosomal protein S11 OS=Mus musculus OX=10090 GN=Rps11 PE=1 SV=1;tr|A0A1B0GSE8|A0A1B0GSE8_MOUSE 40S ribosomal protein S11 (Fragme	3	19	19	19	14	18	17	18	19	17	14	18	17	18	19	17	14	18	17	18	19	17	70.9	70.9	70.9	18.431	158	158;130;135	2.78	139	19	33	36	38	0	130.11	By MS/MS	By MS/MS	By MS/MS	By MS/MS	By MS/MS	By MS/MS
P62242	P62242	19	19	19	40S ribosomal protein S8	Rps8	sp|P62242|RS8_MOUSE 40S ribosomal protein S8 OS=Mus musculus OX=10090 GN=Rps8 PE=1 SV=2	1	19	19	19	16	17	19	19	19	18	16	17	19	19	19	18	16	17	19	19	19	18	62.5	62.5	62.5	24.205	208	208	3.21	157	27	53	87	56	0	272.42	By MS/MS	By MS/MS	By MS/MS	By MS/MS	By MS/MS	By MS/MS
Q9CY58;Q3UMP4	Q9CY58;Q3UMP4	19;18	19;18	2;1	Plasminogen activator inhibitor 1 RNA-binding protein	Serbp1	sp|Q9CY58|PAIRB_MOUSE Plasminogen activator inhibitor 1 RNA-binding protein OS=Mus musculus OX=10090 GN=Serbp1 PE=1 SV=2;tr|Q3UMP4|Q3UMP4_MOUSE Plasminogen activator inhibitor 1 RNA-binding protein OS=Mus musculus OX=10090 GN=Serbp1 PE=1 SV=1	2	19	19	2	16	17	15	15	16	16	16	17	15	15	16	16	2	2	2	2	2	2	49.4	49.4	10.3	44.714	407	407;401	2.81	125	74	79	33	14	0	218.61	By MS/MS	By MS/MS	By MS/MS	By MS/MS	By MS/MS	By MS/MS
P10852;A0A0U1RP98;A0A0U1RPK4;A0A0U1RPL8;A0A0U1RPG5;A0A0U1RP32;A0A0U1RPQ7	P10852;A0A0U1RP98	19;11;8;5;3;3;2	19;11;8;5;3;3;2	19;11;8;5;3;3;2	4F2 cell-surface antigen heavy chain	Slc3a2	sp|P10852|4F2_MOUSE 4F2 cell-surface antigen heavy chain OS=Mus musculus OX=10090 GN=Slc3a2 PE=1 SV=1;tr|A0A0U1RP98|A0A0U1RP98_MOUSE 4F2 cell-surface antigen heavy chain (Fragment) OS=Mus musculus OX=10090 GN=Slc3a2 PE=1 SV=1	7	19	19	19	16	16	18	14	18	17	16	16	18	14	18	17	16	16	18	14	18	17	39.7	39.7	39.7	58.336	526	526;231;303;80;109;113;126	3.25	70	31	26	13	45	0	125.54	By MS/MS	By MS/MS	By MS/MS	By MS/MS	By MS/MS	By MS/MS
P57784;G5E883;A0A0U1RNZ6	P57784	19;8;3	19;8;3	19;8;3	U2 small nuclear ribonucleoprotein A	Snrpa1	sp|P57784|RU2A_MOUSE U2 small nuclear ribonucleoprotein A OS=Mus musculus OX=10090 GN=Snrpa1 PE=1 SV=2	3	19	19	19	15	18	18	17	19	15	15	18	18	17	19	15	15	18	18	17	19	15	63.1	63.1	63.1	28.357	255	255;154;101	2.76	103	17	22	26	28	0	134.43	By MS/MS	By MS/MS	By MS/MS	By MS/MS	By MS/MS	By MS/MS
Q62504	Q62504	19	1	1	Msx2-interacting protein	Spen	sp|Q62504|MINT_MOUSE Msx2-interacting protein OS=Mus musculus OX=10090 GN=Spen PE=1 SV=2	1	19	1	1	14	9	13	8	6	10	1	0	0	0	0	0	1	0	0	0	0	0	9.5	0.4	0.4	398.75	3644	3644	4			1			0.0063446	2.1686	By MS/MS	By matching	By matching	By matching	By matching	By matching
P14576	P14576	19	19	2	Signal recognition particle 54 kDa protein	Srp54	sp|P14576|SRP54_MOUSE Signal recognition particle 54 kDa protein OS=Mus musculus OX=10090 GN=Srp54 PE=1 SV=2	1	19	19	2	17	11	14	11	16	16	17	11	14	11	16	16	2	2	2	2	2	2	40.5	40.5	4.2	55.72	504	504	3.58	43	25	45	33	25	0	139.6	By MS/MS	By MS/MS	By MS/MS	By MS/MS	By MS/MS	By MS/MS
Q6PDM2;H7BX95;F7AI47;F6QXN3	Q6PDM2;H7BX95	19;19;8;2	19;19;8;2	18;18;8;2	Serine/arginine-rich splicing factor 1	Srsf1	sp|Q6PDM2|SRSF1_MOUSE Serine/arginine-rich splicing factor 1 OS=Mus musculus OX=10090 GN=Srsf1 PE=1 SV=3;tr|H7BX95|H7BX95_MOUSE Serine/arginine-rich splicing factor 1 OS=Mus musculus OX=10090 GN=Srsf1 PE=1 SV=1	4	19	19	18	14	17	16	15	18	16	14	17	16	15	18	16	14	16	15	14	17	15	62.9	62.9	60.1	27.744	248	248;253;106;58	3.63	92	27	39	67	64	0	102.29	By MS/MS	By MS/MS	By MS/MS	By MS/MS	By MS/MS	By MS/MS
Q91WM1;A2BH82;A2BH83	Q91WM1	19;3;2	16;3;2	16;3;2	Spermatid perinuclear RNA-binding protein	Strbp	sp|Q91WM1|STRBP_MOUSE Spermatid perinuclear RNA-binding protein OS=Mus musculus OX=10090 GN=Strbp PE=1 SV=1	3	19	16	16	16	12	16	15	15	14	13	10	13	12	12	12	13	10	13	12	12	12	29.5	24.4	24.4	73.704	672	672;167;128	4.23	18	9	18	20	33	0	75.041	By MS/MS	By MS/MS	By MS/MS	By MS/MS	By MS/MS	By MS/MS
Q9Z2I8;A0A0N4SWD1	Q9Z2I8	19;3	19;3	19;3	Succinyl-CoA ligase [GDP-forming] subunit beta, mitochondrial	Suclg2	sp|Q9Z2I8|SUCB2_MOUSE Succinate--CoA ligase [GDP-forming] subunit beta, mitochondrial OS=Mus musculus OX=10090 GN=Suclg2 PE=1 SV=3	2	19	19	19	15	14	18	14	16	17	15	14	18	14	16	17	15	14	18	14	16	17	49	49	49	46.839	433	433;83	3.57	55	34	30	25	46	0	114.25	By MS/MS	By MS/MS	By MS/MS	By MS/MS	By MS/MS	By MS/MS
Q9CX34	Q9CX34	19	19	19	Suppressor of G2 allele of SKP1 homolog	Sugt1	sp|Q9CX34|SGT1_MOUSE Protein SGT1 homolog OS=Mus musculus OX=10090 GN=Sugt1 PE=1 SV=3	1	19	19	19	16	16	16	17	17	17	16	16	16	17	17	17	16	16	16	17	17	17	69.6	69.6	69.6	38.158	336	336	3.26	88	40	63	31	40	0	319.52	By MS/MS	By MS/MS	By MS/MS	By MS/MS	By MS/MS	By MS/MS
Q9WVA4;A0A0A6YXG6	Q9WVA4	19;7	19;7	17;6	Transgelin-2	Tagln2	sp|Q9WVA4|TAGL2_MOUSE Transgelin-2 OS=Mus musculus OX=10090 GN=Tagln2 PE=1 SV=4	2	19	19	17	17	17	19	16	16	15	17	17	19	16	16	15	15	15	17	14	14	13	86.9	86.9	86.9	22.395	199	199;90	3.3	115	10	56	58	48	0	323.31	By MS/MS	By MS/MS	By MS/MS	By MS/MS	By MS/MS	By MS/MS
Q61029	Q61029	19	7	7	Lamina-associated polypeptide 2, isoforms beta/delta/epsilon/gamma	Tmpo	sp|Q61029|LAP2B_MOUSE Lamina-associated polypeptide 2, isoforms beta/delta/epsilon/gamma OS=Mus musculus OX=10090 GN=Tmpo PE=1 SV=4	1	19	7	7	16	16	18	14	14	15	5	6	7	6	4	5	5	6	7	6	4	5	45.4	17.9	17.9	50.372	452	452	2.84	29	9	15		11	0	22.742	By MS/MS	By MS/MS	By MS/MS	By MS/MS	By MS/MS	By MS/MS
E9Q450;E9Q448;S4R2U0	E9Q450;E9Q448;S4R2U0	19;14;11	2;2;0	0;0;0		Tpm1	tr|E9Q450|E9Q450_MOUSE Tropomyosin alpha-1 chain OS=Mus musculus OX=10090 GN=Tpm1 PE=1 SV=1;tr|E9Q448|E9Q448_MOUSE Tropomyosin alpha-1 chain OS=Mus musculus OX=10090 GN=Tpm1 PE=1 SV=1;tr|S4R2U0|S4R2U0_MOUSE Tropomyosin alpha-1 chain OS=Mus musculus OX=1009	3	19	2	0	8	13	12	16	15	17	0	0	0	2	1	2	0	0	0	0	0	0	51.8	9.9	0	32.848	284	284;284;157	2.4	2	2	1			0	7.408	By matching	By matching	By matching	By MS/MS	By MS/MS	By MS/MS
Q8BP43	Q8BP43	19	13	0		Tpm1	tr|Q8BP43|Q8BP43_MOUSE Tropomyosin alpha-1 chain OS=Mus musculus OX=10090 GN=Tpm1 PE=1 SV=1	1	19	13	0	10	14	14	16	16	17	8	8	9	11	11	11	0	0	0	0	0	0	52.1	37.7	0	32.819	284	284	3.24	36	12	43	24	3	0	65.274	By MS/MS	By MS/MS	By MS/MS	By MS/MS	By MS/MS	By MS/MS
E9Q7Q3;D3Z6I8;D3YVR0	E9Q7Q3;D3Z6I8	19;17;3	19;17;3	5;5;0		Tpm3	tr|E9Q7Q3|E9Q7Q3_MOUSE Tropomyosin alpha-3 chain OS=Mus musculus OX=10090 GN=Tpm3 PE=1 SV=1;tr|D3Z6I8|D3Z6I8_MOUSE Tropomyosin alpha-3 chain OS=Mus musculus OX=10090 GN=Tpm3 PE=1 SV=1	3	19	19	5	14	18	18	18	18	19	14	18	18	18	18	19	5	5	5	5	5	5	55.6	55.6	14.1	28.734	248	248;247;71	3.12	93	42	56	56	17	0	135.85	By MS/MS	By MS/MS	By MS/MS	By MS/MS	By MS/MS	By MS/MS
Q8BHN1	Q8BHN1	19	19	15	Gamma-taxilin	Txlng	sp|Q8BHN1|TXLNG_MOUSE Gamma-taxilin OS=Mus musculus OX=10090 GN=Txlng PE=1 SV=1	1	19	19	15	16	14	15	13	15	13	16	14	15	13	15	13	13	11	12	10	11	10	43.3	43.3	35.3	60.308	524	524	3.48	40	34	40	39	14	0	184.21	By MS/MS	By MS/MS	By MS/MS	By MS/MS	By MS/MS	By MS/MS
A0A1L1SV73;Q8BY87	A0A1L1SV73;Q8BY87	19;18	19;18	19;18	Ubiquitin carboxyl-terminal hydrolase 47	Usp47	tr|A0A1L1SV73|A0A1L1SV73_MOUSE Ubiquitin carboxyl-terminal hydrolase 47 OS=Mus musculus OX=10090 GN=Usp47 PE=1 SV=1;sp|Q8BY87|UBP47_MOUSE Ubiquitin carboxyl-terminal hydrolase 47 OS=Mus musculus OX=10090 GN=Usp47 PE=1 SV=2	2	19	19	19	11	10	12	8	11	12	11	10	12	8	11	12	11	10	12	8	11	12	16.6	16.6	16.6	157.15	1376	1376;1376	4.4	1	14	26	10	17	0	45.538	By MS/MS	By MS/MS	By MS/MS	By MS/MS	By MS/MS	By MS/MS
O88342;A0A0J9YU05	O88342	19;7	19;7	19;7	WD repeat-containing protein 1	Wdr1	sp|O88342|WDR1_MOUSE WD repeat-containing protein 1 OS=Mus musculus OX=10090 GN=Wdr1 PE=1 SV=3	2	19	19	19	13	16	17	17	17	15	13	16	17	17	17	15	13	16	17	17	17	15	50.2	50.2	50.2	66.406	606	606;333	3.41	81	13	24	34	51	0	310.5	By MS/MS	By MS/MS	By MS/MS	By MS/MS	By MS/MS	By MS/MS
Q3U821;D3Z504	Q3U821	19;1	19;1	19;1		Wdr75	sp|Q3U821|WDR75_MOUSE WD repeat-containing protein 75 OS=Mus musculus OX=10090 GN=Wdr75 PE=1 SV=1	2	19	19	19	13	16	16	14	16	14	13	16	16	14	16	14	13	16	16	14	16	14	28.2	28.2	28.2	94.036	830	830;151	3.76	44	1	35	38	30	0	90.58	By MS/MS	By MS/MS	By MS/MS	By MS/MS	By MS/MS	By MS/MS
P63101;A0A2I3BQ03;D3YXN6;D3YXF4	P63101;A0A2I3BQ03	19;16;7;3	17;15;6;3	17;15;6;3	14-3-3 protein zeta/delta	Ywhaz	sp|P63101|1433Z_MOUSE 14-3-3 protein zeta/delta OS=Mus musculus OX=10090 GN=Ywhaz PE=1 SV=1;tr|A0A2I3BQ03|A0A2I3BQ03_MOUSE 14-3-3 protein zeta/delta (Fragment) OS=Mus musculus OX=10090 GN=Ywhaz PE=1 SV=1	4	19	17	17	16	17	18	17	18	17	14	15	16	15	16	15	14	15	16	15	16	15	69	64.9	64.9	27.771	245	245;166;88;44	3.42	160	69	194	122	42	0	323.31	By MS/MS	By MS/MS	By MS/MS	By MS/MS	By MS/MS	By MS/MS
Q9CYA6;A0A0G2JFE4;A0A0G2JDI6;A0A0G2JH09;A0A0G2JGW3	Q9CYA6	19;5;4;3;2	19;5;4;3;2	19;5;4;3;2	Zinc finger CCHC domain-containing protein 8	Zcchc8	sp|Q9CYA6|ZCHC8_MOUSE Zinc finger CCHC domain-containing protein 8 OS=Mus musculus OX=10090 GN=Zcchc8 PE=1 SV=3	5	19	19	19	15	10	17	15	15	14	15	10	17	15	15	14	15	10	17	15	15	14	44.9	44.9	44.9	78.025	709	709;173;107;105;103	4.28	49	9	10	38	86	0	181.91	By MS/MS	By MS/MS	By MS/MS	By MS/MS	By MS/MS	By MS/MS
Q62384;F8WHU9	Q62384;F8WHU9	19;18	19;18	19;18	Zinc finger protein ZPR1	Zpr1	sp|Q62384|ZPR1_MOUSE Zinc finger protein ZPR1 OS=Mus musculus OX=10090 GN=Zpr1 PE=1 SV=1;tr|F8WHU9|F8WHU9_MOUSE Zinc finger protein ZPR1 (Fragment) OS=Mus musculus OX=10090 GN=Zpr1 PE=1 SV=1	2	19	19	19	16	16	16	17	18	18	16	16	16	17	18	18	16	16	16	17	18	18	56.2	56.2	56.2	50.714	459	459;386	4.12	55	13	26	70	68	0	147.17	By MS/MS	By MS/MS	By MS/MS	By MS/MS	By MS/MS	By MS/MS
A0A0U1RPA0;S4R190;A0A1L1SV63;A0A1L1SU82;S4R243	A0A0U1RPA0	19;4;3;3;2	19;4;3;3;2	3;0;3;3;0			tr|A0A0U1RPA0|A0A0U1RPA0_MOUSE Pleckstrin homology domain-containing family A member 7 (Fragment) OS=Mus musculus OX=10090 GN=Plekha7 PE=1 SV=1	5	19	19	3	18	11	16	13	15	15	18	11	16	13	15	15	2	2	2	2	2	2	21.2	21.2	3.2	137.12	1212	1212;207;98;124;176	4.36	15	17	13	35	34	0	60.978	By MS/MS	By MS/MS	By MS/MS	By MS/MS	By MS/MS	By MS/MS
P42209;A0A0U1RQA1;D3Z3V3;D3YVG1;A0A0U1RPA8	P42209;A0A0U1RQA1;D3Z3V3;D3YVG1;A0A0U1RPA8	18;17;17;10;9	18;17;17;10;9	18;17;17;10;9	Septin-1	1-Sep	sp|P42209|SEPT1_MOUSE Septin-1 OS=Mus musculus OX=10090 GN=Septin1 PE=1 SV=2;tr|A0A0U1RQA1|A0A0U1RQA1_MOUSE Septin-1 (Fragment) OS=Mus musculus OX=10090 GN=Septin1 PE=1 SV=2;tr|D3Z3V3|D3Z3V3_MOUSE Septin-1 OS=Mus musculus OX=10090 GN=Septin1 PE=1 SV=1;tr|D	5	18	18	18	14	13	16	12	12	12	14	13	16	12	12	12	14	13	16	12	12	12	59.3	59.3	59.3	42.019	366	366;328;338;186;145	3.38	59	32	17	28	37	0	71.245	By MS/MS	By MS/MS	By MS/MS	By MS/MS	By MS/MS	By MS/MS
P09242;E9Q7P8;B1AXF5;B1AXF6	P09242	18;7;6;2	18;7;6;2	18;7;6;2	Alkaline phosphatase, tissue-nonspecific isozyme	Alpl	sp|P09242|PPBT_MOUSE Alkaline phosphatase, tissue-nonspecific isozyme OS=Mus musculus OX=10090 GN=Alpl PE=1 SV=2	4	18	18	18	13	14	17	13	11	10	13	14	17	13	11	10	13	14	17	13	11	10	33.8	33.8	33.8	57.514	524	524;216;157;98	3.9	67	24	28	46	77	0	170.23	By MS/MS	By MS/MS	By MS/MS	By MS/MS	By MS/MS	By MS/MS
Q6PAL0;A0A1L1SU50;A0A1L1SSB5	Q6PAL0	18;4;3	18;4;3	18;4;3	BEN domain-containing protein 3	Bend3	sp|Q6PAL0|BEND3_MOUSE BEN domain-containing protein 3 OS=Mus musculus OX=10090 GN=Bend3 PE=1 SV=1	3	18	18	18	6	6	12	9	8	8	6	6	12	9	8	8	6	6	12	9	8	8	32.6	32.6	32.6	94.154	825	825;159;144	4.32	12	6	11	11	26	0	74.407	By MS/MS	By MS/MS	By MS/MS	By MS/MS	By MS/MS	By MS/MS
Q6ZQ73	Q6ZQ73	18	17	17	Cullin-associated NEDD8-dissociated protein 2	Cand2	sp|Q6ZQ73|CAND2_MOUSE Cullin-associated NEDD8-dissociated protein 2 OS=Mus musculus OX=10090 GN=Cand2 PE=1 SV=2	1	18	17	17	10	8	8	9	12	9	9	8	8	9	11	9	9	8	8	9	11	9	17.7	17.1	17.1	135.63	1235	1235	3.97	16	6	14	30	11	0	46.005	By MS/MS	By MS/MS	By MS/MS	By MS/MS	By MS/MS	By MS/MS
P48758;A0A338P684;A0A1B0GRG8	P48758;A0A338P684	18;9;5	18;9;5	17;8;5	Carbonyl reductase [NADPH] 1	Cbr1	sp|P48758|CBR1_MOUSE Carbonyl reductase [NADPH] 1 OS=Mus musculus OX=10090 GN=Cbr1 PE=1 SV=3;tr|A0A338P684|A0A338P684_MOUSE Carbonyl reductase [NADPH] 1 OS=Mus musculus OX=10090 GN=Cbr1 PE=1 SV=1	3	18	18	17	16	18	16	16	17	16	16	18	16	16	17	16	15	17	15	15	16	15	75.8	75.8	72.9	30.641	277	277;134;277	3.38	91	2	30	40	51	0	116.95	By MS/MS	By MS/MS	By MS/MS	By MS/MS	By MS/MS	By MS/MS
Q80TV8;A0A087WQ95;E9QKH0;A0A087WRE8;E9QNY9;A0A087WP42;A0A087WRK0;A0A087WNW8;A0A087WQF1;A0A087WS18;J3QP81;E9Q6L0;A0A087WQ31;A0A0A6YXZ1;A0A0A6YWK1;A0A0N4SVH2;A0A0N4SUT7;A0A087WRU7	Q80TV8;A0A087WQ95;E9QKH0;A0A087WRE8;E9QNY9;A0A087WP42;A0A087WRK0;A0A087WNW8;A0A087WQF1;A0A087WS18;J3QP81;E9Q6L0;A0A087WQ31;A0A0A6YXZ1	18;18;18;18;18;18;18;18;18;18;18;18;18;15;5;2;2;2	15;15;15;15;15;15;15;15;15;15;15;15;15;12;5;2;1;2	15;15;15;15;15;15;15;15;15;15;15;15;15;12;5;2;1;2	CLIP-associating protein 1	Clasp1	sp|Q80TV8|CLAP1_MOUSE CLIP-associating protein 1 OS=Mus musculus OX=10090 GN=Clasp1 PE=1 SV=2;tr|A0A087WQ95|A0A087WQ95_MOUSE CLIP-associating protein 1 OS=Mus musculus OX=10090 GN=Clasp1 PE=1 SV=2;tr|E9QKH0|E9QKH0_MOUSE CLIP-associating protein 1 OS=Mus mu	18	18	15	15	11	10	15	10	9	13	8	7	12	7	6	10	8	7	12	7	6	10	16.4	14	14	169.23	1535	1535;1469;1536;1526;1526;1492;1477;1475;1468;1460;1459;1452;1552;1244;345;177;285;73	4.29	4	7	21	11	12	0	44.856	By MS/MS	By MS/MS	By MS/MS	By MS/MS	By MS/MS	By MS/MS
Q6P9R1	Q6P9R1	18	18	18	ATP-dependent RNA helicase DDX51	Ddx51	sp|Q6P9R1|DDX51_MOUSE ATP-dependent RNA helicase DDX51 OS=Mus musculus OX=10090 GN=Ddx51 PE=1 SV=1	1	18	18	18	17	15	17	15	15	16	17	15	17	15	15	16	17	15	17	15	15	16	31.8	31.8	31.8	70.367	639	639	3.35	59	9	25	18	36	0	97.557	By MS/MS	By MS/MS	By MS/MS	By MS/MS	By MS/MS	By MS/MS
Q9D0R4;Q5SVX2	Q9D0R4;Q5SVX2	18;12	18;12	18;12	Probable ATP-dependent RNA helicase DDX56	Ddx56	sp|Q9D0R4|DDX56_MOUSE Probable ATP-dependent RNA helicase DDX56 OS=Mus musculus OX=10090 GN=Ddx56 PE=2 SV=1;tr|Q5SVX2|Q5SVX2_MOUSE RNA helicase (Fragment) OS=Mus musculus OX=10090 GN=Ddx56 PE=1 SV=1	2	18	18	18	12	12	16	13	14	12	12	12	16	13	14	12	12	12	16	13	14	12	40.8	40.8	40.8	61.211	546	546;237	3.6	57	8	30	17	49	0	82.414	By MS/MS	By MS/MS	By MS/MS	By MS/MS	By MS/MS	By MS/MS
P54823	P54823	18	18	18	Probable ATP-dependent RNA helicase DDX6	Ddx6	sp|P54823|DDX6_MOUSE Probable ATP-dependent RNA helicase DDX6 OS=Mus musculus OX=10090 GN=Ddx6 PE=1 SV=1	1	18	18	18	13	13	16	17	14	14	13	13	16	17	14	14	13	13	16	17	14	14	41.4	41.4	41.4	54.191	483	483	3.38	70	11	51	26	37	0	122.59	By MS/MS	By MS/MS	By MS/MS	By MS/MS	By MS/MS	By MS/MS
Q99KK7;A0A494BBC1;A0A494BA16;A0A494BBB3;A0A494B918	Q99KK7;A0A494BBC1	18;12;4;4;3	18;12;4;4;3	18;12;4;4;3	Dipeptidyl peptidase 3	Dpp3	sp|Q99KK7|DPP3_MOUSE Dipeptidyl peptidase 3 OS=Mus musculus OX=10090 GN=Dpp3 PE=1 SV=2;tr|A0A494BBC1|A0A494BBC1_MOUSE Dipeptidyl peptidase 3 OS=Mus musculus OX=10090 GN=Dpp3 PE=1 SV=1	5	18	18	18	11	15	13	14	16	13	11	15	13	14	16	13	11	15	13	14	16	13	37.8	37.8	37.8	82.897	738	738;455;185;191;153	3.41	50	31	35	24	29	0	323.01	By MS/MS	By MS/MS	By MS/MS	By MS/MS	By MS/MS	By MS/MS
P32233;F7BQ65	P32233	18;3	18;3	18;3	Developmentally-regulated GTP-binding protein 1	Drg1	sp|P32233|DRG1_MOUSE Developmentally-regulated GTP-binding protein 1 OS=Mus musculus OX=10090 GN=Drg1 PE=1 SV=1	2	18	18	18	15	14	15	16	17	17	15	14	15	16	17	17	15	14	15	16	17	17	51.2	51.2	51.2	40.512	367	367;69	3.58	63	25	33	38	45	0	177.14	By MS/MS	By MS/MS	By MS/MS	By MS/MS	By MS/MS	By MS/MS
Q9Z1D1	Q9Z1D1	18	18	18	Eukaryotic translation initiation factor 3 subunit G	Eif3g	sp|Q9Z1D1|EIF3G_MOUSE Eukaryotic translation initiation factor 3 subunit G OS=Mus musculus OX=10090 GN=Eif3g PE=1 SV=2	1	18	18	18	13	12	14	16	15	15	13	12	14	16	15	15	13	12	14	16	15	15	65.6	65.6	65.6	35.638	320	320	2.67	78	56	57	7	6	0	295.45	By MS/MS	By MS/MS	By MS/MS	By MS/MS	By MS/MS	By MS/MS
Q99JX4;A2A702;A2A701	Q99JX4;A2A702	18;10;6	18;10;6	18;10;6	Eukaryotic translation initiation factor 3 subunit M	Eif3m	sp|Q99JX4|EIF3M_MOUSE Eukaryotic translation initiation factor 3 subunit M OS=Mus musculus OX=10090 GN=Eif3m PE=1 SV=1;tr|A2A702|A2A702_MOUSE Eukaryotic translation initiation factor 3 subunit M OS=Mus musculus OX=10090 GN=Eif3m PE=1 SV=1	3	18	18	18	12	13	13	16	14	13	12	13	13	16	14	13	12	13	13	16	14	13	54.5	54.5	54.5	42.516	374	374;242;143	3.99	62	14	9	38	80	0	161.15	By MS/MS	By MS/MS	By MS/MS	By MS/MS	By MS/MS	By MS/MS
Q03145;Q61772;Q62413;A2BDQ4;G1K381;P35991;Q60629;P29319;A2BDW0;Q6PFV6;E9PUQ4;B7ZNN5;Q8BRB1;E9PUQ2;E9PUP9;E9PUQ0	Q03145	18;2;2;2;2;1;1;1;1;1;1;1;1;1;1;1	18;2;2;2;2;1;1;1;1;1;1;1;1;1;1;1	16;0;0;0;0;0;0;0;0;0;0;0;0;0;0;0	Ephrin type-A receptor 2	Epha2	sp|Q03145|EPHA2_MOUSE Ephrin type-A receptor 2 OS=Mus musculus OX=10090 GN=Epha2 PE=1 SV=3	16	18	18	16	14	17	16	13	11	13	14	17	16	13	11	13	12	15	14	11	10	11	18.8	18.8	17.7	108.85	977	977;998;1035;994;1130;659;876;983;483;819;894;983;984;1006;1017;1040	3.89	42	16	24	54	35	0	64.878	By MS/MS	By MS/MS	By MS/MS	By MS/MS	By MS/MS	By MS/MS
Q8BHK9	Q8BHK9	18	18	18	DNA excision repair protein ERCC-6-like	Ercc6l	sp|Q8BHK9|ERC6L_MOUSE DNA excision repair protein ERCC-6-like OS=Mus musculus OX=10090 GN=Ercc6l PE=1 SV=1	1	18	18	18	10	6	10	11	16	14	10	6	10	11	16	14	10	6	10	11	16	14	18.1	18.1	18.1	138.85	1240	1240	4.6	12	1	20	19	35	0	52.528	By MS/MS	By MS/MS	By MS/MS	By MS/MS	By MS/MS	By MS/MS
Q8C0C7;E9PWY9;D6RIJ2	Q8C0C7;E9PWY9	18;18;4	18;18;4	18;18;4	Phenylalanine--tRNA ligase alpha subunit	Farsa	sp|Q8C0C7|SYFA_MOUSE Phenylalanine--tRNA ligase alpha subunit OS=Mus musculus OX=10090 GN=Farsa PE=1 SV=1;tr|E9PWY9|E9PWY9_MOUSE Phenylalanine--tRNA ligase OS=Mus musculus OX=10090 GN=Farsa PE=1 SV=1	3	18	18	18	12	13	15	13	16	14	12	13	15	13	16	14	12	13	15	13	16	14	38.4	38.4	38.4	57.598	508	508;507;105	3.61	89	4	16	24	82	0	142.07	By MS/MS	By MS/MS	By MS/MS	By MS/MS	By MS/MS	By MS/MS
Q5F258;Q68FF6;F7BIK4;D3Z409;F6WV69	Q5F258;Q68FF6	18;17;3;2;2	18;17;3;2;2	15;14;0;0;0	ARF GTPase-activating protein GIT1	Git1	tr|Q5F258|Q5F258_MOUSE ARF GTPase-activating protein GIT1 OS=Mus musculus OX=10090 GN=Git1 PE=1 SV=1;sp|Q68FF6|GIT1_MOUSE ARF GTPase-activating protein GIT1 OS=Mus musculus OX=10090 GN=Git1 PE=1 SV=1	5	18	18	15	16	8	15	9	12	11	16	8	15	9	12	11	13	7	12	8	9	9	31	31	28.9	84.194	761	761;770;631;201;248	4.37	18	6	12	26	35	0	55.714	By MS/MS	By MS/MS	By MS/MS	By MS/MS	By MS/MS	By MS/MS
Q6PGG6;S4R2Q1	Q6PGG6	18;6	18;6	18;6	Guanine nucleotide-binding protein-like 3-like protein	Gnl3l	sp|Q6PGG6|GNL3L_MOUSE Guanine nucleotide-binding protein-like 3-like protein OS=Mus musculus OX=10090 GN=Gnl3l PE=1 SV=1	2	18	18	18	16	15	15	18	14	15	16	15	15	18	14	15	16	15	15	18	14	15	41.8	41.8	41.8	65.194	577	577;164	3.87	38	24	37	43	36	0	119.3	By MS/MS	By MS/MS	By MS/MS	By MS/MS	By MS/MS	By MS/MS
Q8K284;A0A0U1RPD8;A0A0U1RNK8;A0A0U1RP70	Q8K284;A0A0U1RPD8	18;17;1;1	18;17;1;1	18;17;1;1	General transcription factor 3C polypeptide 1	Gtf3c1	sp|Q8K284|TF3C1_MOUSE General transcription factor 3C polypeptide 1 OS=Mus musculus OX=10090 GN=Gtf3c1 PE=1 SV=2;tr|A0A0U1RPD8|A0A0U1RPD8_MOUSE General transcription factor 3C polypeptide 1 OS=Mus musculus OX=10090 GN=Gtf3c1 PE=1 SV=1	4	18	18	18	8	10	10	10	9	10	8	10	10	10	9	10	8	10	10	10	9	10	12	12	12	237.47	2101	2101;2005;193;294	4.08	15	6	16	17	20	0	37.799	By MS/MS	By MS/MS	By MS/MS	By MS/MS	By MS/MS	By MS/MS
Q99JY0;D3YXU1	Q99JY0	18;5	18;5	18;5	Trifunctional enzyme subunit beta, mitochondrial;3-ketoacyl-CoA thiolase	Hadhb	sp|Q99JY0|ECHB_MOUSE Trifunctional enzyme subunit beta, mitochondrial OS=Mus musculus OX=10090 GN=Hadhb PE=1 SV=1	2	18	18	18	10	14	13	12	13	12	10	14	13	12	13	12	10	14	13	12	13	12	44	44	44	51.386	475	475;173	3.54	32	17	34	31	12	0	49.52	By MS/MS	By MS/MS	By MS/MS	By MS/MS	By MS/MS	By MS/MS
P63158;A0A0J9YUD8;A0A0J9YUZ4;D3YZ18;D3YVC6	P63158;A0A0J9YUD8;A0A0J9YUZ4;D3YZ18	18;18;18;9;6	18;18;18;9;6	15;15;15;6;3	High mobility group protein B1	Hmgb1	sp|P63158|HMGB1_MOUSE High mobility group protein B1 OS=Mus musculus OX=10090 GN=Hmgb1 PE=1 SV=2;tr|A0A0J9YUD8|A0A0J9YUD8_MOUSE High mobility group protein B1 OS=Mus musculus OX=10090 GN=Hmgb1 PE=1 SV=1;tr|A0A0J9YUZ4|A0A0J9YUZ4_MOUSE High mobility group pr	5	18	18	15	14	17	16	14	13	12	14	17	16	14	13	12	12	14	14	13	11	10	45.6	45.6	37.7	24.893	215	215;171;211;124;92	3.37	171	6	55	89	87	0	315.66	By MS/MS	By MS/MS	By MS/MS	By MS/MS	By MS/MS	By MS/MS
P49312;Q5EBP8	P49312;Q5EBP8	18;18	17;17	17;17	Heterogeneous nuclear ribonucleoprotein A1;Heterogeneous nuclear ribonucleoprotein A1, N-terminally processed	Hnrnpa1	sp|P49312|ROA1_MOUSE Heterogeneous nuclear ribonucleoprotein A1 OS=Mus musculus OX=10090 GN=Hnrnpa1 PE=1 SV=2;tr|Q5EBP8|Q5EBP8_MOUSE Helix-destabilizing protein OS=Mus musculus OX=10090 GN=Hnrnpa1 PE=1 SV=1	2	18	17	17	15	17	18	16	17	17	15	16	17	16	16	16	15	16	17	16	16	16	53.8	50.9	50.9	34.196	320	320;373	3.36	143	75	41	76	81	0	149.08	By MS/MS	By MS/MS	By MS/MS	By MS/MS	By MS/MS	By MS/MS
[truncated: 5,353 more rows]
[truncated: 39 more columns]

## Sheet: Filtered raw intensities
	E14_Pause1	E14_Pause2	E14_Pause3	E14_WT1	E14_WT2	E14_WT3
Ahnak	48816000	38734000	48325000	44185000	51647000	47314000
[truncated: 5,769 more rows]

## Sheet: DEA results
	logFC	pval	padj	AveExpr	t	B	DE_status	significant
[truncated: 5,770 more rows]

## Sheet: README
Supplemental Table S6 miRNA-protein networks node and edge quantifications
